# Supplementary material for: Structural and Functional Analysis of Transposable Elements Focusing on B Chromosomes of the Cichlid Fish <em>Astatotilapia latifasciata</em>
Source: Preprints.org preprint supplement (doi:10.20944/preprints201803.0145.v1), 2018-03-19
Supplement: Supplementary file 1 [file supplementary]

## Sheet: Brain
Supplementary file 6: Differential expression levels between B- and B+ brain, muscle and male/female gonads.
Element	Family	Class	logFC.-1	unshrunk.logFC.1	logCPM.-1	PValue.1	FDR.-1
AlRepD-1119	L2	LINE	1.48291	1.4832	8.94426	7.77476e-11	2.36664e-07
CR1-28_HM	CR1	LINE	3.28868	3.31846	4.34504	7.67413e-09	9.68846e-06
REX1-3_XT	Rex-Babar	LINE	1.72972	1.73209	6.24121	9.54842e-09	9.68846e-06
GYPSY2-I_CB	Gypsy	LTR	5.2102	5.36547	4.03348	1.79801e-07	0.000136828
AlRepC-299	Unknown	Unknown	1.5748	1.57579	7.2985	3.78862e-07	0.000230651
I-6_AAe	I	LINE	3.66244	3.80957	2.75501	7.23936e-07	0.000367277
L1-6_DR	L1	LINE	-3.86091	-3.94863	3.51195	8.53687e-07	0.000371232
BovBa-1_EF	RTE-BovB	LINE	4.15598	4.28681	3.26614	1.07432e-06	0.000408779
AlRepD-1964	Unknown	Unknown	1.14202	1.1422	9.1239	9.45557e-06	0.00319808
Gypsy-34-I_DR	Gypsy	LTR	4.54479	4.78475	2.84664	1.15224e-05	0.00350741
AlRepD-520	Unknown	Unknown	1.81126	1.81343	6.49022	1.7615e-05	0.00487455
Mariner-1_SP	TcMar-Fot1	DNA	4.01497	4.15813	2.97566	3.02238e-05	0.00766678
ERV1-3N-EC_I-int	ERV1	LTR	2.47317	2.4768	6.48773	6.19767e-05	0.0125756
Gypsy-17-I_DR	Gypsy	LTR	-1.7877	-1.78893	7.22791	5.49628e-05	0.0125756
Gypsy52-I_DR	Gypsy	LTR	5.48456	5.65763	4.05963	6.61004e-05	0.0125756
Tc1-2Eso	TcMar-Tc1	DNA	2.44785	2.45438	5.58546	6.56319e-05	0.0125756
Rex1-52_DR	Rex-Babar	LINE	-3.12199	-3.12452	7.6221	7.38444e-05	0.0132225
Helitron-2_DR	Helitron	RC	-1.23851	-1.23855	11.4316	0.000162416	0.0274663
RMER17C-int	ERVK	LTR	2.66841	2.68975	4.21341	0.00017899	0.0286761
Gypsy-20-I_DR	Gypsy	LTR	-2.11437	-2.11603	7.17855	0.00030706	0.0467345
Gypsy-19-I_DR	Gypsy	LTR	-2.27581	-2.29664	3.65474	0.00038104	0.0543542
LTR18_Cja	ERV1	LTR	-3.52168	-3.56424	3.75321	0.000392836	0.0543542
AlRepE-1110	Unknown	Unknown	1.16719	1.16763	7.90462	0.000434817	0.0575471
Furousha1	hAT-Ac	DNA	2.12973	2.14305	4.26072	0.000561335	0.071196
Gypsy-14-I_DR	Gypsy	LTR	-1.86001	-1.86192	6.70141	0.000698566	0.0799065
REX1-1_DR	Rex-Babar	LINE	0.859546	0.85988	7.8158	0.000708763	0.0799065
Transib-14_HM	CMC-Transib	DNA	-1.95293	-1.96183	4.56683	0.000659119	0.0799065
AlRepD-4141	Unknown	Unknown	-3.12834	-3.15708	4.33149	0.000813665	0.088457
Helitron-N1B_CGi	Helitron	RC	-1.77031	-1.77836	4.49325	0.0011457	0.118451
Zisupton-3_DR	Zisupton	DNA	1.12283	1.12381	6.72688	0.00116739	0.118451
Kiri-2_DTa	L2	LINE	1.1155	1.11674	6.38974	0.0012509	0.12283
DNA-8-22_DR	hAT	DNA	1.46434	1.47336	4.05547	0.00159429	0.151657
AlRepC-239	Unknown	Unknown	-1.41887	-1.41906	9.45457	0.00178941	0.16506
BELPADRE_I-int	Pao	LTR	2.65658	2.6899	3.65481	0.00186916	0.167345
AlRepB-358	hAT-Ac	DNA	0.547292	0.547307	11.572	0.00202863	0.176432
CR1_Ele16	CR1	LINE	-2.18954	-2.20162	4.25429	0.00217057	0.183534
L1-104_DR	L1	LINE	2.02134	2.0332	4.31578	0.00251771	0.207133
AlRepD-2048	Unknown	Unknown	-0.937656	-0.938182	7.27317	0.00352155	0.282095
AlRepD-813	Unknown	Unknown	1.43499	1.43723	5.961	0.00387152	0.302177
RTEX-21_SK	RTE-X	LINE	-1.5946	-1.59952	4.92938	0.00400197	0.30455
Gypsy-22_GA-I	Gypsy	LTR	-2.01068	-2.03243	3.47218	0.00474568	0.321019
Gypsy-24_XT-I	Gypsy	LTR	1.62669	1.63837	3.93831	0.00442259	0.321019
Gypsy38-I_DR	Gypsy	LTR	2.24544	2.28029	3.15756	0.00461242	0.321019
Gypsy4-I_DR	Gypsy	LTR	1.72305	1.73299	4.23076	0.00465649	0.321019
LTR32_Ttr	ERV1	LTR	-1.23549	-1.23831	5.35213	0.00453608	0.321019
hAT-8_DR	hAT-Tip100	DNA	1.63625	1.64682	4.05944	0.00491641	0.325338
hAT-N7_BF	hAT-Ac	DNA	-1.26498	-1.27086	4.3289	0.00543018	0.330589
MuDr-3_HM	MULE-MuDR	DNA	1.09317	1.09522	5.62752	0.00539013	0.330589
Outcast-1_DAn	Jockey	LINE	2.00257	2.0354	2.97817	0.00525441	0.330589
AlRepD-245	Rex-Babar	LINE	-1.24568	-1.24795	5.65423	0.00521896	0.330589
EnSpm-3_DR	CMC-EnSpm	DNA	-1.8095	-1.82004	4.07504	0.00620636	0.370434
Gypsy-25_IS-I	Gypsy	LTR	0.786195	0.786548	7.57182	0.0065304	0.382279
Rex1-1_PM	Rex-Babar	LINE	0.52906	0.529111	9.7772	0.00768545	0.429684
AlRepD-402	Unknown	Unknown	-2.25637	-2.30322	2.89626	0.00776367	0.429684
U14	snRNA	snRNA	2.51838	2.58696	2.58886	0.00761707	0.429684
CR1-2_IS	CR1	LINE	0.956697	0.95762	6.51539	0.00821914	0.446769
L1-97_DR	L1	LINE	1.77826	1.79662	3.48906	0.0097426	0.520289
AlRepD-195	Unknown	Unknown	-0.763177	-0.763845	6.61414	0.0101809	0.525268
Tigger2	TcMar-Tigger	DNA	-1.91713	-1.96465	2.53071	0.0100715	0.525268
AlRepD-1719	L2	LINE	-0.790119	-0.790514	7.41342	0.0112666	0.571594
AlRepC-2352	Unknown	Unknown	-1.9572	-1.99093	2.96407	0.0125139	0.624462
Gypsy124-I_DR	Gypsy	LTR	-1.4678	-1.48663	3.06688	0.0129982	0.628038
Invader4_I-int	Gypsy	LTR	-1.92249	-1.93908	3.59719	0.0128746	0.628038
Crack-2_HM	L2	LINE	1.38816	1.39982	3.63316	0.0135172	0.642914
AlRepE-2243	Unknown	Unknown	-2.11741	-2.13777	3.7489	0.0137848	0.645554
DNA-8-24_DR	hAT	DNA	-1.28457	-1.28905	4.80062	0.0145666	0.671829
7SK	RNA	RNA	-1.3717	-1.37485	5.29623	0.015128	0.687306
hAT-7_PM	hAT-Charlie	DNA	-1.6322	-1.63603	5.41187	0.0157517	0.705122
P-15_HM	P	DNA	-1.81142	-1.81715	4.89106	0.0167027	0.736857
hAT-N68_DR	hAT-Ac	DNA	-1.254	-1.25507	6.72162	0.0174086	0.757027
L1P1	L1	LINE	1.29691	1.3067	3.75017	0.0179671	0.770306
TguLTRL1_I	ERVL	LTR	-1.74237	-1.7639	3.28892	0.0183636	0.776373
Gypsy-27_AMi-LTR	Gypsy	LTR	-1.80961	-1.82269	3.76087	0.0190075	0.781877
SINE2-2_SP	tRNA	SINE	-1.11673	-1.12072	4.64303	0.0188308	0.781877
Gypsy-119_AA-LTR	Gypsy	LTR	0.741332	0.741881	6.85344	0.0193487	0.785299
Daphne-38_HMa	L2	LINE	-0.970671	-0.971097	7.6236	0.0205985	0.793696
EnSpm-19_DR	CMC-EnSpm	DNA	1.70029	1.71181	4.0455	0.0202201	0.793696
ERV4_DR-I	ERV1	LTR	-0.885631	-0.886091	7.39052	0.0205245	0.793696
Gypsy-178_DR-I	Gypsy	LTR	1.31772	1.32691	3.85518	0.0199661	0.793696
ERV1-7_AMi-I	ERV1	LTR	-1.11367	-1.11846	4.4311	0.0214162	0.806806
Gypsy-31_DYa-I	Gypsy	LTR	-1.03199	-1.0347	5.10204	0.0214689	0.806806
Penelope-2_LHu	LINE	LINE	-1.84373	-1.86612	3.07649	0.022043	0.818278
ZFERV_I-int	ERV1	LTR	1.13721	1.14394	4.03355	0.0225876	0.828392
Mariner-5_GA	TcMar-ISRm11	DNA	1.13274	1.13493	5.5633	0.0229114	0.830265
Tx1-18_DR	L1-Tx1	LINE	1.13465	1.13837	4.81729	0.0249213	0.892476
AlRepD-1512	Unknown	Unknown	-1.43936	-1.44599	4.46626	0.0252834	0.894916
Chapaev-4_HMa	CMC-Chapaev-3	DNA	1.43779	1.45268	3.37268	0.0258081	0.902988
hAT-N4_LMi	hAT-Ac	DNA	1.11976	1.12533	4.25016	0.0262781	0.908983
DNA-TTAA0-7_DR	DNA	DNA	1.71479	1.72931	3.72065	0.0266047	0.909939
Copia17-NVi_I-int	Copia	LTR	-1.2899	-1.29969	3.63094	0.0276721	0.919259
hAT-24_DR	hAT-Ac	DNA	-1.86797	-1.88741	3.4395	0.0277831	0.919259
AlRepD-3668	DNA	DNA	0.832841	0.833689	6.40227	0.0272991	0.919259
Gypsy13-I_DR	Gypsy	LTR	-1.14609	-1.14806	5.69508	0.0282534	0.920858
AlRepD-2072	ERV1	LTR	-1.05852	-1.05986	6.13619	0.0284365	0.920858
hAT-3_LCh	DNA	DNA	-1.41761	-1.42397	4.36995	0.0299797	0.960613
AlRepC-659	Unknown	Unknown	0.602591	0.602712	8.72041	0.0305269	0.967957
hAT-N70_DR	hAT	DNA	-0.789234	-0.789509	7.92636	0.0310293	0.973744
Chapaev3-1_AC	CMC-Chapaev-3	DNA	-0.949135	-0.952979	4.45441	0.031677	0.977739
DIRS-5_SP	DIRS	LTR	-1.387	-1.40196	3.33422	0.031799	0.977739
ORTE-1_AAe	RTE-BovB	LINE	1.32505	1.32825	5.31792	0.0323328	0.984211
AlRepE-10970	Unknown	Unknown	-1.04209	-1.0458	4.74107	0.0328775	0.990881
HarbingerN5_DR	PIF-Harbinger	DNA	-1.4268	-1.43406	4.11817	0.0344691	0.995152
hAT-5_LCh	DNA	DNA	-1.03666	-1.0436	3.81077	0.0344035	0.995152
AlRepC-4009	Unknown	Unknown	0.713369	0.713748	7.31249	0.0346538	0.995152
AlRepC-572	Unknown	Unknown	-0.642493	-0.642523	10.7928	0.0345514	0.995152
SAT2pl	Satellite	Satellite	-1.1176	-1.12366	4.03396	0.0341929	0.995152
5S-Sauria	5S-Sauria-RTE	SINE	0.452803	0.455048	4.13205	0.395072	0.999668
7SLRNA	srpRNA	srpRNA	-1.11873	-1.11902	8.41153	0.105955	0.999668
Academ-1_CGi	Academ	DNA	-0.257742	-0.258491	4.79167	0.597736	0.999668
Academ-1_GA	Academ	DNA	-0.00967901	-0.00968279	8.17819	0.973957	0.999668
Academ-1_HM	Academ	DNA	-0.36634	-0.367376	4.97065	0.396762	0.999668
Academ-1_PM	Academ	DNA	-0.344418	-0.345444	4.73962	0.479429	0.999668
Academ-1_SK	Academ	DNA	0.517541	0.518456	5.61137	0.215847	0.999668
Academ-2_BF	Academ	DNA	-0.231101	-0.233694	3.23642	0.759188	0.999668
Academ-3_ADi	Academ2	DNA	0.443702	0.445204	4.64508	0.412964	0.999668
Academ-4_BF	Academ	DNA	0.10611	0.106759	3.48755	0.876379	0.999668
Academ-4_SP	Academ	DNA	-0.24531	-0.245659	5.92618	0.458065	0.999668
Academ-5_SK	Academ	DNA	0.170995	0.171067	7.56914	0.578443	0.999668
Academ-5_SP	Academ	DNA	0.0721462	0.0724575	3.90531	0.901662	0.999668
Academ-N1_DRe	Academ	DNA	0.114585	0.115506	3.47064	0.840647	0.999668
AGAM2	CR1	LINE	0.106928	0.107558	3.43013	0.853302	0.999668
AgaP15	P	DNA	-0.236291	-0.237278	4.36896	0.604626	0.999668
Ag-Jock-1	Jockey	LINE	0.13938	0.139395	9.54537	0.600667	0.999668
ALRY-MAJOR_PT	Y-chromosome	Satellite	0.367327	0.368136	5.26933	0.691427	0.999668
AmnL2-1	L2	LINE	0.50726	0.511432	3.46274	0.445786	0.999668
AmnSINE1	5S-Deu-L2	SINE	-0.387338	-0.390199	3.5799	0.381474	0.999668
AnolisSINE2c	tRNA-Sauria	SINE	-0.239461	-0.239808	5.89968	0.675965	0.999668
BARI_DM	TcMar-Tc1	DNA	-0.410589	-0.410737	7.82423	0.253459	0.999668
BEL-10_CSa-I	Pao	LTR	0.354754	0.357648	3.42555	0.540303	0.999668
BEL-10_DEl-I	Pao	LTR	0.699271	0.703657	3.82115	0.269828	0.999668
BEL-10_GA-I	Pao	LTR	0.368659	0.370952	3.72087	0.48909	0.999668
BEL-10-I_NV	Pao	LTR	-0.415816	-0.416624	5.42016	0.319307	0.999668
BEL-11_GA-I	Pao	LTR	0.597368	0.60237	3.44237	0.339071	0.999668
BEL11-I_DR	Pao	LTR	0.137024	0.13711	6.97333	0.753521	0.999668
BEL-137_AA-LTR	Pao	LTR	-1.35925	-1.36198	5.44444	0.0587875	0.999668
BEL-13_Adi-I	Pao	LTR	-0.111253	-0.112498	3.10345	0.829933	0.999668
BEL-13_DEl-I	Pao	LTR	0.685671	0.688953	4.18266	0.174939	0.999668
BEL-161_AA-I	Pao	LTR	0.145006	0.145443	4.71223	0.828437	0.999668
BEL-17_Adi-I	Pao	LTR	0.0735393	0.0738167	3.69812	0.908898	0.999668
BEL-17_DEl-I	Pao	LTR	-0.811661	-0.81599	3.96161	0.256762	0.999668
BEL-18_CQ-I	Pao	LTR	0.553553	0.557213	3.73236	0.302627	0.999668
BEL18-I_DR	Pao	LTR	-0.0295622	-0.0295916	4.86038	0.95047	0.999668
BEL-192_AA-I	Pao	LTR	-0.130438	-0.130604	6.1159	0.78005	0.999668
BEL19-I_AG	Pao	LTR	0.0794119	0.079536	5.55342	0.873799	0.999668
BEL-1_CQ-I	Pao	LTR	0.275134	0.275475	6.04888	0.406185	0.999668
BEL-1_DAn-I	Pao	LTR	0.0432851	0.0434595	4.07711	0.927174	0.999668
BEL-1_DBp-I	Pao	LTR	1.03912	1.04678	3.70683	0.0873191	0.999668
BEL-1_DWil-I	Pao	LTR	0.410148	0.410506	6.56526	0.408887	0.999668
BEL-1_GA-I	Pao	LTR	0.991354	0.996446	4.24094	0.221119	0.999668
BEL1-I_SM	Pao	LTR	-0.222942	-0.222946	12.0642	0.458974	0.999668
BEL-1-I_XT	Pao	LTR	0.0355693	0.0356734	4.18862	0.963861	0.999668
BEL-1-LTR_NVi	Pao	LTR	0.0542839	0.0543261	6.62728	0.933647	0.999668
BEL-20_AA-I	Pao	LTR	-0.514607	-0.514861	7.38505	0.167109	0.999668
BEL20-I_DR	Pao	LTR	-0.0795354	-0.0803648	3.57386	0.914509	0.999668
BEL-21_DWil-I	Pao	LTR	1.37766	1.39496	3.17296	0.148345	0.999668
BEL-231_AA-I	Pao	LTR	-0.590808	-0.594213	4.05801	0.368785	0.999668
BEL-232_AA-I	Pao	LTR	0.0973757	0.0976061	4.91685	0.849636	0.999668
BEL-236_AA-I	Pao	LTR	0.164533	0.164854	5.32147	0.754463	0.999668
BEL-25_CQ-I	Pao	LTR	-0.375164	-0.379669	3.12518	0.559776	0.999668
BEL25-I_DR	Pao	LTR	0.881639	0.884386	4.84737	0.0749539	0.999668
BEL-26_CQ-I	Pao	LTR	-0.322689	-0.323167	5.77097	0.406015	0.999668
BEL-26_DR-I	Pao	LTR	0.297078	0.298264	4.34888	0.591323	0.999668
BEL-27_CQ-I	Pao	LTR	-0.607003	-0.611885	3.59525	0.279641	0.999668
BEL-2_DSe-I	Pao	LTR	-0.370741	-0.371198	6.02491	0.348309	0.999668
BEL2-I_SP	Pao	LTR	-0.0819055	-0.0820815	5.11809	0.82681	0.999668
BEL-30_CQ-LTR	Pao	LTR	0.298296	0.299015	5.09711	0.468868	0.999668
BEL30-I_DR	Pao	LTR	-0.184834	-0.187231	3.00792	0.834608	0.999668
BEL31-I_DR	Pao	LTR	0.399985	0.400979	5.07783	0.451158	0.999668
BEL31-LTR_DR	Pao	LTR	0.992926	0.998282	4.1165	0.0674916	0.999668
BEL32-I_DR	Pao	LTR	0.0796614	0.0797014	7.31354	0.891581	0.999668
BEL32-LTR_DR	Pao	LTR	0.00395735	0.0039449	5.26441	0.994578	0.999668
BEL-33_AA-I	Pao	LTR	-0.153408	-0.155076	3.22434	0.791314	0.999668
BEL36-I_DR	Pao	LTR	-0.0645456	-0.0646684	5.5298	0.852857	0.999668
BEL-37-I_DR	Pao	LTR	0.376424	0.379433	3.4944	0.574766	0.999668
BEL-37-LTR_DR	Pao	LTR	0.55536	0.560486	3.35741	0.372196	0.999668
BEL-38_CQ-I	Pao	LTR	-0.479521	-0.485369	3.08742	0.396202	0.999668
BEL-39_DRe-I	Pao	LTR	0.59056	0.592227	4.9194	0.234678	0.999668
BEL-3_Adi-I	Pao	LTR	0.0153979	0.0146118	2.70894	0.984777	0.999668
BEL-3_DBp-I	Pao	LTR	-0.401517	-0.405332	3.36874	0.550185	0.999668
BEL-3_DPer-I	Pao	LTR	-0.74779	-0.755078	3.28242	0.270814	0.999668
BEL-3_GA-I	Pao	LTR	0.171252	0.172641	3.3366	0.772936	0.999668
BEL-3-I_XT	Pao	LTR	-1.62715	-1.63686	3.97697	0.0415072	0.999668
BEL-3_PM-I	Pao	LTR	-0.230183	-0.230726	5.22231	0.577397	0.999668
BEL-40_DRe-I	Pao	LTR	0.258851	0.259502	5.00822	0.607113	0.999668
BEL-41_DRe-I	Pao	LTR	-0.0215689	-0.021602	5.38667	0.96509	0.999668
BEL-43_DRe-I	Pao	LTR	0.548165	0.553675	3.21837	0.497027	0.999668
BEL-46_DRe-I	Pao	LTR	0.330475	0.331546	4.67661	0.571894	0.999668
BEL-48_AA-I	Pao	LTR	0.163395	0.163597	6.02924	0.662295	0.999668
BEL-48_DRe-I	Pao	LTR	0.430386	0.432445	4.17415	0.417368	0.999668
BEL-49_DRe-I	Pao	LTR	0.145056	0.145975	3.57731	0.781064	0.999668
BEL-4_CSa-I	Pao	LTR	-0.248143	-0.248322	6.8436	0.390411	0.999668
BEL-4_DBi-I	Pao	LTR	0.497719	0.498783	5.35089	0.182088	0.999668
BEL-4_DWil-I	Pao	LTR	0.742762	0.748414	3.65979	0.149633	0.999668
BEL-4_GA-I	Pao	LTR	-0.896032	-0.901976	3.73596	0.088802	0.999668
BEL4-I_AG	Pao	LTR	-0.394466	-0.397271	3.59686	0.475238	0.999668
BEL-4-I_XT	Pao	LTR	0.322134	0.32381	3.94368	0.51927	0.999668
BEL-4_LH-I	LTR	LTR	0.288049	0.28894	4.75549	0.637221	0.999668
BEL-50_DRe-I	Pao	LTR	0.868235	0.87202	4.36156	0.11165	0.999668
BEL-51_DRe-I	Pao	LTR	0.637149	0.638751	5.08609	0.188383	0.999668
BEL-52_DRe-LTR	Pao	LTR	0.228967	0.229487	5.1973	0.556065	0.999668
BEL-56_AA-I	Pao	LTR	-0.0111422	-0.0112876	3.78791	0.98141	0.999668
BEL-57_CQ-I	Pao	LTR	-0.0205975	-0.0206368	5.36538	0.962345	0.999668
BEL-57_DRe-I	Pao	LTR	0.0220402	0.0222412	3.30879	0.970235	0.999668
BEL-58_DRe-I	Pao	LTR	0.0732976	0.0735145	4.37559	0.894226	0.999668
BEL-592_AA-I	Pao	LTR	-0.336166	-0.338548	3.80396	0.541925	0.999668
BEL-59_DRe-I	Pao	LTR	-0.307202	-0.30759	6.03573	0.369907	0.999668
BEL-5_Adi-I	Pao	LTR	0.130143	0.130214	7.20221	0.792578	0.999668
BEL-5_CQ-I	Pao	LTR	0.488928	0.492229	3.69726	0.465656	0.999668
BEL-5_DAn-LTR	Pao	LTR	-0.849464	-0.860457	3.06562	0.296702	0.999668
BEL5-I_DR	Pao	LTR	0.380321	0.381207	5.155	0.489622	0.999668
BEL-609_AA-I	Pao	LTR	0.386917	0.388954	4.04744	0.472756	0.999668
BEL-60_AA-I	Pao	LTR	-0.268548	-0.269061	5.28431	0.658784	0.999668
BEL-60_DRe-I	Pao	LTR	-0.0164268	-0.0165215	4.07397	0.972942	0.999668
BEL-60_DRe-LTR	Pao	LTR	-0.384617	-0.385695	4.9114	0.371581	0.999668
BEL-618_AA-I	Pao	LTR	-0.0489644	-0.0489855	7.57725	0.869196	0.999668
BEL-61_DRe-I	Pao	LTR	-0.334326	-0.33473	6.04823	0.377959	0.999668
BEL-622_AA-I	Pao	LTR	0.526443	0.529774	3.79469	0.366899	0.999668
BEL-62_CQ-I	Pao	LTR	-0.842453	-0.845794	4.34714	0.183029	0.999668
BEL-633_AA-I	Pao	LTR	0.0584352	0.0585016	2.91348	0.936638	0.999668
BEL-646_AA-I	Pao	LTR	1.19894	1.21996	2.71497	0.155753	0.999668
BEL-65_AA-I	Pao	LTR	-0.195786	-0.195826	8.62306	0.590785	0.999668
BEL-6_Ano-I	Pao	LTR	-1.00206	-1.00899	3.78066	0.1276	0.999668
BEL-6_GA-I	Pao	LTR	0.31736	0.317615	6.72867	0.397817	0.999668
BEL-74_CQ-I	Pao	LTR	0.361371	0.363426	3.94143	0.593714	0.999668
BEL-7_AA-I	Pao	LTR	-0.2103	-0.210877	4.74203	0.684404	0.999668
BEL-7_DPu-I	Pao	LTR	0.111616	0.11226	3.53446	0.855469	0.999668
BEL-7_GA-I	Pao	LTR	0.546493	0.552315	3.2395	0.466063	0.999668
BEL-7_GA-LTR	Pao	LTR	0.31954	0.322821	3.09546	0.620281	0.999668
BEL8-I_DR	Pao	LTR	0.233389	0.233622	6.33897	0.618217	0.999668
BEL-9_DWil-I	Pao	LTR	0.00276889	0.00273269	4.70048	0.995908	0.999668
BEL-9_GA-I	Pao	LTR	0.33637	0.337038	5.36573	0.523442	0.999668
BHIKHARI-4-I_DR	LTR	LTR	-0.692945	-0.699434	3.27605	0.302324	0.999668
BMRP1	Satellite	Satellite	-0.224905	-0.225039	7.14706	0.731981	0.999668
BMSAT1	Satellite	Satellite	0.252208	0.252887	4.96004	0.637161	0.999668
BovB_PMo	RTE-BovB	LINE	-0.652353	-0.653521	5.52	0.122205	0.999668
Bridge1_FR	Penelope	LINE	-0.00841575	-0.00842707	6.13755	0.98155	0.999668
Bridge1_TN	Penelope	LINE	-0.00119239	-0.00119217	9.20046	0.996118	0.999668
Bridge2_Xena_	Penelope	LINE	0.278307	0.278538	6.60877	0.407621	0.999668
BtERVF1_I-int	ERV1	LTR	-0.365842	-0.36943	3.2384	0.546959	0.999668
CASAT_HD	Satellite	Satellite	-0.138437	-0.138458	9.06685	0.559481	0.999668
CATCH1I_DR	Pao	LTR	-0.115521	-0.116062	4.29616	0.853554	0.999668
CATCH2LTR_DR	Pao	LTR	-0.00888268	-0.00888326	10.0931	0.968683	0.999668
CER10-I_CE	Pao	LTR	0.172308	0.174009	3.08088	0.802846	0.999668
CER2-1-LTR_CE	Pao	LTR	-0.177715	-0.177853	6.71371	0.580286	0.999668
CER8-I_CE	Pao	LTR	-0.96196	-0.970489	3.52146	0.113958	0.999668
Chap3a_Cis	hAT-Charlie	DNA	-0.0671278	-0.0672912	5.35882	0.908282	0.999668
Chapaev-10_HM	CMC-Chapaev	DNA	-0.0330708	-0.0331096	5.73323	0.935976	0.999668
Chapaev-19_HM	CMC-Chapaev	DNA	-0.0927265	-0.0939734	3.21885	0.884622	0.999668
Chapaev-1_AA	CMC-Chapaev	DNA	0.0712753	0.0713758	5.7021	0.891709	0.999668
Chapaev-20_HM	CMC-Chapaev-3	DNA	0.23344	0.235034	3.67643	0.723612	0.999668
Chapaev3-1_HR	CMC-Chapaev-3	DNA	-0.0584983	-0.0586936	4.97252	0.878124	0.999668
Chapaev3-2_HR	CMC-Chapaev-3	DNA	-0.0692959	-0.069746	4.04581	0.905009	0.999668
Chapaev3-2_PM	CMC-Chapaev-3	DNA	0.267126	0.267357	6.55084	0.596867	0.999668
Chapaev3-3_PM	CMC-Chapaev-3	DNA	0.79915	0.806059	3.46538	0.235824	0.999668
Chapaev3-5_PM	CMC-Chapaev-3	DNA	-1.02389	-1.03469	3.31335	0.167925	0.999668
Chapaev3-6_HM	CMC-Chapaev-3	DNA	-0.987374	-0.994864	3.43408	0.282103	0.999668
Chapaev-3A_HM	CMC-Chapaev	DNA	0.116988	0.117072	6.76179	0.74628	0.999668
Chapaev-3_HM	CMC-Chapaev	DNA	0.162224	0.162581	5.1515	0.752467	0.999668
Chapaev-3_NV	CMC-Chapaev	DNA	-0.117207	-0.117337	6.06527	0.743014	0.999668
Chapaev-4_HM	CMC-Chapaev	DNA	0.704409	0.708171	4.09451	0.194964	0.999668
Chapaev-6_HM	CMC-Chapaev	DNA	-0.275643	-0.276476	4.85259	0.47596	0.999668
Chapaev-7_HM	CMC-Chapaev	DNA	-0.381188	-0.385046	3.35597	0.505973	0.999668
Chapaev-8_HM	CMC-Chapaev	DNA	0.0563919	0.0564359	6.62662	0.873074	0.999668
Chapaev-N5_AAe	CMC-Chapaev	DNA	0.0330865	0.0332727	3.91383	0.944681	0.999668
Chaplin1_DR	hAT-Charlie	DNA	0.305962	0.307459	4.07517	0.523408	0.999668
Chaplin1_FR	hAT-Charlie	DNA	0.641877	0.645498	3.96782	0.209631	0.999668
Chaplin4_FR	hAT-Charlie	DNA	0.159051	0.159187	6.52639	0.644634	0.999668
Chaplin5_FR	hAT-Charlie	DNA	0.0767603	0.0773876	3.21441	0.916064	0.999668
Chaplin6_FR	hAT-Charlie	DNA	0.569386	0.571661	4.4376	0.332796	0.999668
Chaplin7a_FR	hAT-Charlie	DNA	0.00316108	0.0030577	3.84903	0.996713	0.999668
Chaplin8_FR	hAT-Charlie	DNA	0.0898498	0.0900745	5.1887	0.817099	0.999668
Charlie1	hAT-Charlie	DNA	-0.336023	-0.338483	3.75283	0.545716	0.999668
Charlie12_Rodent	hAT-Charlie	DNA	-0.219212	-0.219768	4.93347	0.664821	0.999668
Charlie17b	hAT-Charlie	DNA	-0.177046	-0.178935	3.36619	0.781904	0.999668
Charlie3_Xt	hAT-Charlie	DNA	0.512612	0.514744	4.34803	0.317948	0.999668
Ci000012	Unknown	Unknown	0.0506645	0.0507896	4.49844	0.921962	0.999668
CoeEFV-I	LTR	LTR	0.464933	0.468559	3.49797	0.388762	0.999668
Copia-11H_DR-LTR	Gypsy	LTR	-0.295959	-0.296004	9.06934	0.192004	0.999668
Copia11-NVi_I-int	Copia	LTR	0.673007	0.679729	3.21134	0.323376	0.999668
Copia-14_LH-I	LTR	LTR	0.137393	0.13754	6.25588	0.700383	0.999668
Copia16-NVi_I-int	Copia	LTR	0.437074	0.43961	3.90855	0.559628	0.999668
Copia-17_CQ-I	Copia	LTR	-0.195691	-0.196374	4.61662	0.764455	0.999668
Copia-1_AA-I	Copia	LTR	-0.74723	-0.754938	3.22192	0.366294	0.999668
Copia-1_AC-I	Copia	LTR	-0.977183	-0.978079	6.53402	0.1034	0.999668
Copia-1_Ano-I	Copia	LTR	0.691357	0.697345	3.4151	0.346473	0.999668
Copia-1_DSim-I	Copia	LTR	-0.223976	-0.224105	7.11923	0.688745	0.999668
Copia1-I_DR	Copia	LTR	-0.607639	-0.608253	6.33488	0.232899	0.999668
Copia-1-I_HS	Copia	LTR	-0.108703	-0.108766	7.21378	0.737538	0.999668
Copia1-I_XT	Copia	LTR	-0.287205	-0.289343	3.7446	0.628072	0.999668
Copia1-LTR_AG	Copia	LTR	0.732347	0.73867	3.42866	0.357099	0.999668
Copia-1_SI-I	Copia	LTR	0.584339	0.588922	3.54448	0.439524	0.999668
Copia-21_DPu-I	Copia	LTR	0.121319	0.121684	4.71512	0.879228	0.999668
Copia-27_DPu-I	Copia	LTR	0.0240185	0.0240292	5.28221	0.955213	0.999668
Copia-34_DPu-I	Copia	LTR	0.330707	0.334441	3.09223	0.608117	0.999668
Copia-3_CGi-I	Copia	LTR	0.592184	0.596875	3.49022	0.252744	0.999668
Copia-3_GA-I	Copia	LTR	0.9991	1.00068	5.82385	0.0404016	0.999668
Copia3-I_DR	Copia	LTR	-0.159634	-0.159674	8.3174	0.567756	0.999668
Copia-45_AA-LTR	Copia	LTR	-1.0631	-1.07002	3.94652	0.0540249	0.999668
Copia5-I_DR	Copia	LTR	-0.157709	-0.157763	7.88793	0.576352	0.999668
Copia-7_Ano-I	Copia	LTR	0.366767	0.368387	4.21516	0.504289	0.999668
Copia-7-I_DR	Gypsy	LTR	-0.187946	-0.188945	4.19175	0.713027	0.999668
Copia-9_Ano-I	Copia	LTR	0.65474	0.659612	3.61691	0.233181	0.999668
Copia9-NVi_I-int	Copia	LTR	0.588106	0.589186	5.52138	0.239527	0.999668
CR1-10D_AMi	CR1	LINE	-0.590301	-0.594201	3.88135	0.432448	0.999668
CR1-10_DR	L2	LINE	0.170941	0.171226	5.58587	0.664044	0.999668
CR1-110_AAe	CR1	LINE	0.300936	0.301628	5.1452	0.576148	0.999668
CR1-12_CGi	CR1-Zenon	LINE	-0.349291	-0.35133	3.97086	0.502436	0.999668
CR1-12_DR	L2	LINE	-0.338031	-0.338326	6.53227	0.299159	0.999668
CR1-1_AG	L2	LINE	0.148551	0.148766	5.79104	0.827972	0.999668
CR1-1b_Lch	LINE	LINE	0.708852	0.715421	3.38323	0.377095	0.999668
CR1-1_CPB	CR1	LINE	0.295445	0.295565	7.6507	0.449832	0.999668
CR1-1_DRh	CR1	LINE	-0.337492	-0.339536	4.00587	0.645066	0.999668
CR1-1_DVi	CR1	LINE	0.232255	0.232454	6.56825	0.533435	0.999668
CR1-1_IS	CR1	LINE	-0.317265	-0.320491	3.14515	0.557664	0.999668
CR1-20_CQ	CR1	LINE	-0.57876	-0.580814	4.66386	0.35812	0.999668
CR1-20_HM	L2	LINE	0.925762	0.935492	3.21991	0.15722	0.999668
CR1-20_NV	CR1	LINE	0.50483	0.505325	6.39831	0.108781	0.999668
CR1-22_DR	L2	LINE	-0.547864	-0.547989	8.49897	0.162029	0.999668
CR1-24_DR	L2	LINE	-0.0654009	-0.0655038	5.87688	0.854727	0.999668
CR1-25_CQ	CR1	LINE	-0.0161582	-0.0162081	4.9542	0.973289	0.999668
CR1-26_BF	CR1-Zenon	LINE	0.66274	0.667683	3.59097	0.324488	0.999668
CR1-26_HM	L2	LINE	0.351125	0.35197	5.14838	0.642093	0.999668
CR1-29_BF	CR1-Zenon	LINE	0.0356199	0.0357737	4.99211	0.945177	0.999668
CR1-2_CQ	CR1	LINE	-0.449246	-0.450186	5.35285	0.243836	0.999668
CR1-2_DAn	CR1	LINE	-0.665891	-0.674582	2.9605	0.349027	0.999668
CR1-2_DRh	CR1	LINE	-0.0158832	-0.0160801	4.09571	0.974832	0.999668
CR1-2_FR	Rex-Babar	LINE	0.0520702	0.0520766	9.34075	0.8203	0.999668
CR1-2_LCh	LINE	LINE	-0.327345	-0.329632	3.77777	0.545788	0.999668
CR1-2_TCa	L2	LINE	-0.124184	-0.124474	4.96759	0.805972	0.999668
CR1-37_DR	L2	LINE	-0.207947	-0.20799	8.60605	0.502857	0.999668
CR1-3c_LCh	LINE	LINE	0.162442	0.16315	4.25725	0.825109	0.999668
CR1-3_DWi	CR1	LINE	0.0139504	0.0140119	4.52494	0.975162	0.999668
CR1-3_FR	Rex-Babar	LINE	0.148526	0.148554	8.74938	0.549031	0.999668
CR1-3_NV	CR1	LINE	0.0959362	0.0975001	2.81276	0.90789	0.999668
CR1-42_DR	L2	LINE	-0.201066	-0.202631	3.58271	0.747908	0.999668
CR1-42_HM	L2	LINE	0.77572	0.783368	3.21963	0.2185	0.999668
CR1-44_DR	L2	LINE	0.211021	0.21146	5.29215	0.637908	0.999668
CR1-46_HM	L2-Hydra	LINE	-0.792511	-0.800105	3.19083	0.273825	0.999668
CR1-49_BF	CR1	LINE	0.228533	0.231331	2.82521	0.728719	0.999668
CR1-49_DR	L2	LINE	-0.0560055	-0.0560889	6.00997	0.883836	0.999668
CR1-4_HM	L2	LINE	-0.455134	-0.457082	4.30472	0.393918	0.999668
CR1-50_HM	CR1	LINE	-0.897749	-0.908669	3.12659	0.1676	0.999668
CR1-51_DR	L2	LINE	0.457366	0.459125	4.54247	0.383655	0.999668
CR1-53_BF	CR1-Zenon	LINE	0.587053	0.58919	4.58557	0.202383	0.999668
CR1-59_AAe	CR1	LINE	0.104759	0.105457	3.17272	0.873254	0.999668
CR1-5_CGi	CR1-Zenon	LINE	0.13672	0.137516	3.67044	0.843114	0.999668
CR1-5_DT	CR1	LINE	0.561202	0.564762	3.84101	0.414749	0.999668
CR1-62_HM	CR1	LINE	-0.751323	-0.753234	5.01396	0.213993	0.999668
CR1-66_HM	L2	LINE	0.162095	0.162674	4.66996	0.681769	0.999668
CR1-69_HM	CR1	LINE	-0.0104422	-0.0104831	5.38232	0.983702	0.999668
CR1-76_HM	CR1	LINE	0.478978	0.483104	3.36299	0.408343	0.999668
CR1-79_HM	L2	LINE	0.0847078	0.0847324	8.12819	0.750832	0.999668
CR1-7_CQ	CR1	LINE	0.291157	0.293788	3.31092	0.690341	0.999668
CR1-80_HM	L2	LINE	0.124799	0.125009	5.57162	0.770724	0.999668
CR1-86_HM	L2	LINE	0.187366	0.188605	3.45478	0.728178	0.999668
CR1-89_HM	CR1	LINE	-0.176298	-0.176569	5.79927	0.751625	0.999668
CR1-9_DTa	CR1	LINE	-0.138437	-0.139826	3.42023	0.814452	0.999668
CR1-C3	CR1	LINE	-0.0438297	-0.0442564	3.78658	0.949935	0.999668
CR1_Ele24	CR1	LINE	-0.0120905	-0.0122535	4.15572	0.982742	0.999668
CR1_Ele33	CR1	LINE	0.256793	0.257747	4.46859	0.633406	0.999668
CR1_Ele42	CR1	LINE	-0.430634	-0.430805	7.68381	0.195139	0.999668
CR1_Ele7	CR1	LINE	-0.352516	-0.352965	6.05024	0.284337	0.999668
CR1-L2_Tgu	CR1	LINE	0.00321269	0.00321057	4.46566	0.995562	0.999668
Crack-17_AAe	L2	LINE	0.43877	0.440773	4.20524	0.391726	0.999668
Crack-1_DR	L2	LINE	-0.107619	-0.108015	4.69534	0.848831	0.999668
Crack-1_PM	L2	LINE	-0.160206	-0.16106	4.19506	0.775006	0.999668
Crack-23_BF	L2	LINE	-0.0473166	-0.0473788	4.89015	0.929865	0.999668
Crack-26_AAe	L2	LINE	0.0954678	0.0958434	4.33722	0.867307	0.999668
Crack-28_AAe	L2	LINE	0.378011	0.380996	3.4893	0.633011	0.999668
Crack-29_BF	L2	LINE	-0.412534	-0.41342	5.19918	0.351193	0.999668
Crack-2_SP	L2	LINE	-0.209943	-0.210364	5.26176	0.61398	0.999668
Crack-3_AAe	L2	LINE	0.0173089	0.0173409	3.61693	0.972653	0.999668
Crack-3_CQ	L2	LINE	1.05326	1.06476	3.19339	0.0915367	0.999668
Crack-3_DR	L2	LINE	0.0923302	0.0923522	8.38816	0.714329	0.999668
Crack-7_HM	L2	LINE	0.562298	0.562861	6.38773	0.0965904	0.999668
Crypton-7_CGi	Crypton	DNA	-0.102516	-0.102693	5.74439	0.820011	0.999668
CryptonA-1N2_OL	Crypton	DNA	1.20237	1.21135	3.73696	0.0822021	0.999668
CryptonV-1_DR	Crypton-V	DNA	0.128576	0.128619	7.8921	0.716594	0.999668
CryptonV-2_DR	Crypton-V	DNA	-0.254526	-0.254688	6.99645	0.400434	0.999668
CryptonV-3_DR	Crypton-V	DNA	0.323131	0.323253	7.76531	0.262358	0.999668
CSINE2	tRNA-C	SINE	-0.223344	-0.224911	3.69804	0.699576	0.999668
CSINE3A	tRNA-C	SINE	0.626639	0.63256	3.3194	0.341458	0.999668
Dada-1_BF	Dada	DNA	-0.0333564	-0.0333643	8.49031	0.914982	0.999668
Dada-1_CI	Dada	DNA	0.798111	0.804829	3.49321	0.225475	0.999668
Dada-1_GM	Dada	DNA	-0.211372	-0.212555	4.1333	0.712666	0.999668
Dada-1_NV	Dada	DNA	0.464253	0.466228	4.33907	0.398184	0.999668
Dada-1_ON	Dada	DNA	0.127357	0.127697	4.86584	0.813055	0.999668
Dada-tA_OL	Dada	DNA	0.1522	0.152251	7.94215	0.579333	0.999668
Dada-tL_DR	Dada	DNA	0.0194832	0.0194865	9.04882	0.936568	0.999668
Dada-U1A_DR	Dada	DNA	0.028788	0.0287847	3.99715	0.956254	0.999668
Dada-U1B_DR	Dada	DNA	-0.724001	-0.726165	4.78634	0.177311	0.999668
Dada-U6_DR	Dada	DNA	-0.192468	-0.192881	5.35207	0.651297	0.999668
Dada-U6_GA	Dada	DNA	0.114064	0.114366	4.83049	0.81804	0.999668
Dada-U6_OL	Dada	DNA	-0.201899	-0.202935	4.02001	0.697337	0.999668
Dada-U6_SS	Dada	DNA	0.207612	0.207728	7.14098	0.530747	0.999668
DANA	tRNA-V	SINE	0.591276	0.594862	3.88372	0.261203	0.999668
Daphne-16_HMa	L2	LINE	0.678347	0.686459	3.07472	0.39185	0.999668
Daphne-18_HM	L2	LINE	0.0178514	0.017853	9.68874	0.948051	0.999668
Daphne-19_SP	L2	LINE	1.0128	1.02107	3.5875	0.0566048	0.999668
Daphne-1_SK	L2	LINE	0.5792	0.583027	3.73127	0.238973	0.999668
Daphne-21_SPu	L2	LINE	0.0794589	0.0800349	3.6955	0.882402	0.999668
Daphne-27_DRe	L2	LINE	0.431897	0.431941	9.64777	0.0563388	0.999668
Daphne-52_HMa	L2	LINE	-0.312947	-0.31402	4.48973	0.627138	0.999668
Daphne-65_HMa	L2	LINE	0.170632	0.17247	3.03571	0.813892	0.999668
Daphne-73_HMa	L2	LINE	-0.20656	-0.206588	9.20942	0.436143	0.999668
DIRS-11_XT	DIRS	LTR	-0.46931	-0.471216	4.39033	0.271613	0.999668
DIRS-12_ACar	DIRS	LTR	0.267781	0.269781	3.50868	0.696352	0.999668
DIRS-12_DR	DIRS	LTR	0.0234509	0.0234781	5.04858	0.963924	0.999668
DIRS-13B_XT	DIRS	LTR	-0.387821	-0.388187	6.40674	0.483677	0.999668
DIRS-13_DR	DIRS	LTR	0.0106921	0.0106939	9.08523	0.963929	0.999668
DIRS-15B_DR	Ngaro	LTR	0.0730136	0.0730427	7.63207	0.79895	0.999668
DIRS-15_DR	Ngaro	LTR	0.0418565	0.0418747	7.66698	0.883707	0.999668
DIRS-17_XT	DIRS	LTR	-0.130084	-0.130914	3.18474	0.890556	0.999668
DIRS-1C-LTR_DR	Ngaro	LTR	0.806939	0.815347	3.21003	0.265464	0.999668
DIRS-1D-I_DR	Ngaro	LTR	0.0800605	0.0807848	3.67799	0.895099	0.999668
DIRS-1_DPu	DIRS	LTR	-0.303632	-0.304415	4.88163	0.529156	0.999668
DIRS-1E-LTR_DR	Ngaro	LTR	0.230289	0.230371	7.80815	0.449149	0.999668
DIRS-1F-LTR_DR	Ngaro	LTR	0.390213	0.391249	4.9609	0.310699	0.999668
DIRS1_FR	DIRS	LTR	0.284822	0.284934	7.69688	0.597	0.999668
DIRS-1-LTR_DR	Ngaro	LTR	0.481766	0.48268	5.49751	0.210787	0.999668
DIRS-22_ACar	DIRS	LTR	-0.530846	-0.533089	4.22092	0.334967	0.999668
DIRS-26_XT	DIRS	LTR	0.0833955	0.0836313	5.01244	0.853391	0.999668
DIRS-2E_CPB	DIRS	LTR	0.632345	0.636094	3.89012	0.236138	0.999668
DIRS-36A_XT	DIRS	LTR	0.314607	0.315414	5.03116	0.600132	0.999668
DIRS-36_XT	DIRS	LTR	0.253175	0.254886	3.73021	0.697775	0.999668
DIRS-49_XT	DIRS	LTR	1.25871	1.27215	3.28203	0.1479	0.999668
DIRS-4_DR	Ngaro	LTR	-0.225906	-0.226483	4.92838	0.58575	0.999668
DIRS-4N2_DR	Ngaro	LTR	0.35356	0.355776	3.84525	0.483224	0.999668
DIRS-4N3_DR	Ngaro	LTR	0.0233435	0.0233923	4.66113	0.967116	0.999668
DIRS-4_SP	DIRS	LTR	-0.32242	-0.326231	3.20332	0.602007	0.999668
DIRS-52_XT	DIRS	LTR	-0.0226409	-0.0232173	3.30025	0.967407	0.999668
DIRS-5_DR	Ngaro	LTR	0.691354	0.69395	4.55141	0.238178	0.999668
DIRS-8A_XT	DIRS	LTR	-0.125303	-0.12557	5.20333	0.780284	0.999668
DIRS-8B_DR	Ngaro	LTR	-0.17483	-0.174861	8.81801	0.571372	0.999668
DIRS-8_DR	Ngaro	LTR	-0.00410917	-0.00410864	7.37839	0.990365	0.999668
DIRS-9B_DR	Ngaro	LTR	-0.0232583	-0.0233615	4.96946	0.963303	0.999668
DIRS-9_NV	DIRS	LTR	0.583524	0.587548	3.68876	0.311672	0.999668
DIRS-N3_DR	Ngaro	LTR	1.02118	1.03421	3.05079	0.218131	0.999668
DNA-11_CGi	DNA	DNA	0.122387	0.122446	7.35723	0.820941	0.999668
DNA-1-1_DR	PIF-Harbinger	DNA	0.318379	0.31937	4.71741	0.540851	0.999668
DNA-1-2_DR	DNA	DNA	-0.175773	-0.176573	4.40489	0.712065	0.999668
DNA-1-7_DR	PIF-Harbinger	DNA	0.0983615	0.0984159	7.26136	0.773432	0.999668
DNA-1-8_DR	DNA	DNA	-0.0352135	-0.0352265	7.79215	0.901185	0.999668
DNA-1-9_DR	PIF-Harbinger	DNA	0.927857	0.937838	3.19065	0.194339	0.999668
DNA1c_Lch	DNA	DNA	-0.0517249	-0.0519707	4.35489	0.911013	0.999668
DNA-1_CQ	DNA	DNA	0.237882	0.239182	3.88754	0.696154	0.999668
DNA-1_Gav	DNA	DNA	-0.378075	-0.378483	6.21891	0.340401	0.999668
DNA2-10_CGi	DNA	DNA	-0.0737995	-0.0738253	7.83881	0.78384	0.999668
DNA2-10_DR	DNA	DNA	0.106698	0.106771	6.85513	0.735734	0.999668
DNA-2-12_DR	CMC-EnSpm	DNA	0.219439	0.219669	6.27051	0.638433	0.999668
DNA-2-13_DR	DNA	DNA	-0.45198	-0.454852	3.73416	0.436183	0.999668
DNA2-13_DR	DNA	DNA	-0.0924302	-0.0930302	3.99731	0.878661	0.999668
DNA-2-14_DR	CMC-EnSpm	DNA	0.106819	0.107333	3.55264	0.846819	0.999668
DNA2-14_DR	DNA	DNA	-0.487938	-0.48891	5.4736	0.426169	0.999668
DNA-2-15_DR	DNA	DNA	-0.0251087	-0.0251158	7.76709	0.935148	0.999668
DNA2-16_DR	DNA	DNA	0.0412771	0.0412857	8.49565	0.884461	0.999668
DNA2-18_CGi	TcMar-Tc2	DNA	-0.819363	-0.822939	4.41379	0.132244	0.999668
DNA-2-18_DR	CMC-EnSpm	DNA	-0.727518	-0.72844	6.03927	0.0515672	0.999668
DNA-2-1_DR	CMC-EnSpm	DNA	0.800662	0.804732	4.14228	0.14448	0.999668
DNA2-1_DR	CMC-EnSpm	DNA	-0.0880083	-0.0883625	4.66955	0.855177	0.999668
DNA-2-20_DR	CMC-EnSpm	DNA	0.311325	0.311403	8.36233	0.279106	0.999668
DNA-2-24B_DR	DNA	DNA	-0.0839023	-0.0839801	6.35946	0.810662	0.999668
DNA-2-24_DR	DNA	DNA	0.250749	0.251647	4.49836	0.68245	0.999668
DNA2-27_CGi	DNA	DNA	-0.150744	-0.150821	7.25188	0.634972	0.999668
DNA2-2_CQ	hAT-Tip100	DNA	0.00613751	0.00610517	3.95085	0.99118	0.999668
DNA-2-30B_DR	DNA	DNA	-0.181011	-0.181852	4.24985	0.770136	0.999668
DNA-2-30_DR	DNA	DNA	0.0233239	0.0233619	5.00165	0.956996	0.999668
DNA-2-31_DR	TcMar-ISRm11	DNA	0.514826	0.515226	6.75697	0.37594	0.999668
DNA-2-32_DR	DNA	DNA	-0.215861	-0.216205	5.76738	0.619368	0.999668
DNA-2-34_DR	TcMar-ISRm11	DNA	-0.11351	-0.113887	4.51257	0.795877	0.999668
DNA-2-3_DR	TcMar-ISRm11	DNA	0.263246	0.2634	7.14206	0.417943	0.999668
DNA2-3_DR	hAT	DNA	-0.00521441	-0.00521425	7.42728	0.985437	0.999668
DNA2-5_DR	hAT-Ac	DNA	-0.0727526	-0.0727615	9.36303	0.756865	0.999668
DNA2-6_DR	DNA	DNA	0.355002	0.356061	4.84224	0.384309	0.999668
DNA2-7_CGi	DNA	DNA	0.0348604	0.0349087	5.5002	0.936987	0.999668
DNA2-7_DR	DNA	DNA	0.00496048	0.00496015	6.84913	0.990073	0.999668
DNA2c_Lch	DNA	DNA	0.183803	0.183994	6.26183	0.641057	0.999668
DNA3-10_CGi	DNA	DNA	0.525536	0.526671	5.27091	0.224921	0.999668
DNA3-1_CGi	CMC-EnSpm	DNA	-0.0393289	-0.0393582	6.62237	0.92302	0.999668
DNA3-20_CGi	DNA	DNA	0.274193	0.276655	3.49875	0.654876	0.999668
DNA-3-5_DR	DNA	DNA	0.212281	0.212389	7.29388	0.598096	0.999668
DNA4-22_CGi	DNA	DNA	0.664342	0.668725	3.81149	0.156436	0.999668
DNA4-24_CGi	DNA	DNA	-0.382984	-0.383077	8.37779	0.285999	0.999668
DNA-4-3_DR	DNA	DNA	-0.144494	-0.144547	7.80515	0.581479	0.999668
DNA-4-5_DR	DNA	DNA	-0.109048	-0.109462	4.63439	0.870782	0.999668
DNA-5-2B_DR	hAT-Tip100	DNA	0.148598	0.148804	5.841	0.684157	0.999668
DNA5-4_CGi	DNA	DNA	0.0315558	0.0315781	6.63505	0.955015	0.999668
DNA-5-4_DR	DNA	DNA	0.401246	0.402011	5.43682	0.434418	0.999668
DNA5_Lch	DNA	DNA	0.372337	0.374875	3.63384	0.470585	0.999668
DNA6-10_DR	DNA	DNA	0.516682	0.517526	5.67956	0.290106	0.999668
DNA6-13B_CGi	DNA	DNA	0.0181654	0.0181687	4.65626	0.973137	0.999668
DNA6-1_DR	hAT-hAT5	DNA	-0.260795	-0.262656	3.76902	0.674971	0.999668
DNA6-2_DR	DNA	DNA	1.08658	1.09287	4.04377	0.0504998	0.999668
DNA6-4_DR	DNA	DNA	-0.0361629	-0.0361742	7.74019	0.907506	0.999668
DNA6-6_DR	DNA	DNA	-0.00237449	-0.00237467	9.67381	0.991981	0.999668
DNA-6-N2_DR	DNA	DNA	0.08744	0.0874736	7.73	0.760522	0.999668
DNA-6-N5_DR	DNA	DNA	-0.242306	-0.242469	6.92974	0.389516	0.999668
DNA-6-N7_DR	TcMar	DNA	0.412864	0.414299	4.60588	0.48562	0.999668
DNA7_Lch	DNA	DNA	-0.342891	-0.346338	3.22996	0.629165	0.999668
DNA7-N1_DR	DNA	DNA	0.190006	0.190038	8.92377	0.504419	0.999668
DNA7-N2_DR	hAT-hAT6	DNA	0.327214	0.328179	4.84418	0.552798	0.999668
DNA-7_NV	DNA	DNA	0.323352	0.326303	3.36879	0.609105	0.999668
DNA8-10_CGi	DNA	DNA	0.475508	0.475911	6.59631	0.186741	0.999668
DNA8-10_DR	hAT-Ac	DNA	-0.0787109	-0.0787426	7.60802	0.773621	0.999668
DNA-8-13_DR	hAT	DNA	0.27651	0.276724	6.70428	0.486967	0.999668
DNA8-14_DR	DNA	DNA	0.36325	0.363967	5.40315	0.501137	0.999668
DNA8-15_CQ	DNA	DNA	0.120629	0.120752	6.24976	0.702624	0.999668
DNA8-17_DR	DNA	DNA	-0.0701852	-0.0702076	7.91177	0.823105	0.999668
DNA-8-18_DR	hAT	DNA	0.0902038	0.0902163	9.16024	0.767023	0.999668
DNA8-1_DR	hAT-Ac	DNA	0.437618	0.441864	3.21787	0.534412	0.999668
DNA-8-21_DR	hAT-Ac	DNA	0.15518	0.155881	4.1343	0.798061	0.999668
DNA8-21_DR	Merlin	DNA	0.257465	0.25752	8.57242	0.286717	0.999668
DNA8-23_DR	DNA	DNA	0.259016	0.259248	6.5045	0.430347	0.999668
DNA-8-25_DR	hAT-Ac	DNA	0.268466	0.268525	8.51306	0.399901	0.999668
DNA8-25_DR	DNA	DNA	0.1374	0.137432	8.42028	0.689087	0.999668
DNA-8-26_DR	hAT-Tip100	DNA	-1.22845	-1.232	4.91261	0.0699547	0.999668
DNA8-26_DR	DNA	DNA	-0.0454497	-0.0454541	9.71748	0.847516	0.999668
DNA-8-27_DR	hAT-Ac	DNA	-0.0766133	-0.0766586	7.03537	0.796388	0.999668
DNA8-2_CQ	DNA	DNA	-0.221864	-0.225776	2.65027	0.768446	0.999668
DNA8-2_DR	hAT-Tip100	DNA	0.116004	0.116127	6.36473	0.746378	0.999668
DNA8-2_PBa	DNA	DNA	0.121167	0.121212	7.72709	0.740779	0.999668
DNA-8-32_DR	hAT	DNA	0.148094	0.148225	6.43496	0.638629	0.999668
DNA-8-34_DR	hAT-Tip100	DNA	-0.327737	-0.328835	4.56496	0.464259	0.999668
DNA-8-3_DR	DNA	DNA	0.270028	0.27007	9.0318	0.345523	0.999668
DNA-8-3_HM	DNA	DNA	-0.293765	-0.293868	7.8346	0.413996	0.999668
DNA8-4A_DR	hAT-Charlie	DNA	-0.342002	-0.342197	7.12766	0.396526	0.999668
DNA-8-4_DR	hAT	DNA	-0.987555	-0.997403	3.40809	0.125397	0.999668
DNA-8-5_DR	hAT	DNA	-0.0739116	-0.0739154	10.6453	0.733263	0.999668
DNA8-5_DR	hAT-Ac	DNA	-0.424675	-0.424718	9.64765	0.243986	0.999668
DNA8-7_CQ	DNA	DNA	0.471914	0.47602	3.38306	0.40632	0.999668
DNA-8-9_DR	hAT-Ac	DNA	-0.46919	-0.469411	7.45778	0.151327	0.999668
DNA9-2_AAe	MULE-MuDR	DNA	-0.0725515	-0.0727307	5.2525	0.893989	0.999668
DNA9-3_DR	DNA	DNA	0.144887	0.144903	9.57879	0.57714	0.999668
DNA9-5_DR	DNA	DNA	-0.235867	-0.236047	6.70819	0.466927	0.999668
DNA9TA1_DR	CMC-EnSpm	DNA	-0.212491	-0.212554	8.11117	0.441549	0.999668
DNA-AT-2_DR	DNA	DNA	-0.374266	-0.375081	5.28262	0.310131	0.999668
DNA-N4_DR	DNA	DNA	0.383716	0.383889	7.49967	0.181937	0.999668
DNA-TA-12_CQ	DNA	DNA	0.383625	0.384145	5.9859	0.316404	0.999668
DNA-TA-4_DR	TcMar	DNA	0.0650983	0.0653495	3.88432	0.91282	0.999668
DNA-TA-4_NV	TcMar-Tc2	DNA	0.0134438	0.0134456	3.43451	0.981175	0.999668
DNA-TA-5_DR	TcMar-Tigger	DNA	-0.0514505	-0.0514587	8.90695	0.834557	0.999668
DNA-TA-6_NV	TcMar-Pogo	DNA	0.588519	0.593656	3.40128	0.35683	0.999668
DNA-TTAA0-1_DR	DNA	DNA	-0.0804836	-0.080583	6.14432	0.82377	0.999668
DNA-TTAA0-5_DR	DNA	DNA	-0.348065	-0.348494	6.08669	0.272999	0.999668
DNA-X-11_DR	DNA	DNA	-1.20089	-1.21152	3.40038	0.0997931	0.999668
DNA-X-12_DR	DNA	DNA	0.159069	0.159097	8.81628	0.574958	0.999668
DNA-X-13_DR	DNA	DNA	0.417491	0.418961	4.6091	0.513177	0.999668
DNA-X-16_DR	DNA	DNA	-0.266257	-0.26628	9.90153	0.473353	0.999668
DNAX-23_DR	DNA	DNA	0.0568181	0.0568551	6.80807	0.874206	0.999668
DNAX-24B_DR	DNA	DNA	0.17857	0.17872	6.58681	0.552888	0.999668
DNAX-24_DR	PIF-Harbinger	DNA	0.131221	0.131321	6.73971	0.704568	0.999668
DNAX-25_DR	Zisupton	DNA	-0.233272	-0.233613	5.81104	0.514655	0.999668
DNA-X-3_DR	DNA	DNA	0.0236427	0.0238917	3.09993	0.972219	0.999668
DNA-X-6_DR	DNA	DNA	0.0892604	0.0893816	6.08418	0.789697	0.999668
Dong2_FR	Dong-R4	LINE	0.026516	0.026517	11.0765	0.901156	0.999668
Dong_FR	Dong-R4	LINE	0.180652	0.180658	11.3374	0.395525	0.999668
EnSpm-10_DR	CMC-EnSpm	DNA	-0.0876012	-0.0876906	6.40234	0.867973	0.999668
EnSpm-10_HM	CMC-EnSpm	DNA	-0.267449	-0.267751	6.11416	0.545422	0.999668
EnSpm-10N1_DR	CMC-EnSpm	DNA	0.482423	0.482695	7.23276	0.194554	0.999668
EnSpm-11_DR	CMC-EnSpm	DNA	0.297916	0.297989	8.3871	0.371623	0.999668
EnSpm-12_DR	CMC-EnSpm	DNA	-0.109881	-0.110451	3.41625	0.832326	0.999668
EnSpm-13_DR	CMC-EnSpm	DNA	0.500782	0.501549	5.78041	0.343324	0.999668
EnSpm-14_DR	CMC-EnSpm	DNA	0.63035	0.630892	6.61836	0.0558614	0.999668
EnSpm-14_HM	CMC-EnSpm	DNA	-0.126857	-0.127085	5.62428	0.856195	0.999668
EnSpm-14N1_DR	CMC-EnSpm	DNA	-0.0575083	-0.0575368	7.21023	0.86704	0.999668
EnSpm-15_DR	CMC-EnSpm	DNA	0.261983	0.262085	7.70981	0.442444	0.999668
EnSpm-15_HM	CMC-EnSpm	DNA	-0.0972522	-0.0978071	4.16813	0.886383	0.999668
EnSpm-16_DR	CMC-EnSpm	DNA	-0.871615	-0.872408	6.53351	0.0597524	0.999668
EnSpm-16_HM	CMC-EnSpm	DNA	0.305295	0.306224	4.78039	0.615478	0.999668
EnSpm-17_DR	CMC-EnSpm	DNA	0.533916	0.536083	4.40274	0.288549	0.999668
EnSpm-17_HM	CMC-EnSpm	DNA	0.0260835	0.0260874	9.00121	0.916474	0.999668
EnSpm-18_DR	CMC-EnSpm	DNA	0.206092	0.206383	5.84289	0.694487	0.999668
EnSpm-1_BF	CMC-EnSpm	DNA	0.122972	0.123963	3.14926	0.828456	0.999668
EnSpm-1_HM	CMC-EnSpm	DNA	0.23486	0.234987	7.23872	0.702255	0.999668
EnSpm-1_NV	CMC-EnSpm	DNA	0.0336211	0.0337171	4.13889	0.951021	0.999668
EnSpm-1_PM	CMC-EnSpm	DNA	-0.252252	-0.252363	7.51723	0.394028	0.999668
EnSpm-21_HMa	CMC-EnSpm	DNA	-0.588662	-0.591085	4.45863	0.213176	0.999668
EnSpm-22_HMa	CMC-EnSpm	DNA	0.170985	0.171267	5.58802	0.694363	0.999668
EnSpm-2_DR	CMC-EnSpm	DNA	0.420957	0.421569	5.84291	0.440352	0.999668
EnSpm-2_HM	CMC-EnSpm	DNA	-0.591196	-0.593388	4.62136	0.406804	0.999668
EnSpm-3_NVe	CMC-EnSpm	DNA	0.471132	0.472787	4.59769	0.362677	0.999668
EnSpm-4_ADi	CMC-EnSpm	DNA	0.160233	0.160445	5.87952	0.756352	0.999668
EnSpm-4_DR	CMC-EnSpm	DNA	-0.382974	-0.384944	4.18483	0.61157	0.999668
EnSpm-4_HM	CMC-EnSpm	DNA	-0.0812453	-0.0812706	8.02329	0.767587	0.999668
EnSpm-5_DR	CMC-EnSpm	DNA	-0.31729	-0.317349	8.76174	0.338427	0.999668
EnSpm-5_HM	CMC-EnSpm	DNA	0.127202	0.12721	10.3342	0.560223	0.999668
ENSPM-6_DR	CMC-EnSpm	DNA	-0.0505472	-0.0505494	10.8085	0.816443	0.999668
EnSpm-6_HM	CMC-EnSpm	DNA	0.0496105	0.0496289	7.69128	0.894248	0.999668
EnSpm-6N1_DR	CMC-EnSpm	DNA	-0.0545968	-0.0546378	6.95181	0.855315	0.999668
EnSpm-7_DR	CMC-EnSpm	DNA	-0.178654	-0.17868	9.07242	0.468873	0.999668
EnSpm-7_HM	CMC-EnSpm	DNA	0.156336	0.156405	7.51364	0.752655	0.999668
EnSpm-8_DR	CMC-EnSpm	DNA	0.591459	0.592627	5.43111	0.246576	0.999668
EnSpm-9_DR	CMC-EnSpm	DNA	0.0296857	0.0296864	11.6369	0.888851	0.999668
EnSpm-9_HM	CMC-EnSpm	DNA	0.049705	0.0497623	6.0147	0.927344	0.999668
EnSpm-N10_DR	CMC-EnSpm	DNA	-0.113042	-0.113063	8.70736	0.683153	0.999668
EnSpm-N11_DR	CMC-EnSpm	DNA	-0.0534151	-0.0534325	7.97798	0.836829	0.999668
EnSpm-N13_DR	CMC-EnSpm	DNA	0.0650182	0.0650195	12.0077	0.800131	0.999668
EnSpm-N14_DR	CMC-EnSpm	DNA	-0.0442558	-0.0442612	9.28498	0.858409	0.999668
EnSpm-N15_DR	CMC-EnSpm	DNA	0.442864	0.445373	3.96917	0.441084	0.999668
EnSpm-N17_DR	TcMar	DNA	-0.484841	-0.485264	6.54022	0.180348	0.999668
EnSpm-N18_DR	CMC-EnSpm	DNA	-0.391217	-0.395899	3.20271	0.565226	0.999668
EnSpm-N1_CGi	CMC-EnSpm	DNA	0.163381	0.164195	4.02317	0.811777	0.999668
EnSpmN1_DR	CMC-EnSpm	DNA	0.650097	0.651368	5.44914	0.0679507	0.999668
EnSpm-N20_DR	CMC-EnSpm	DNA	0.386334	0.388002	4.26414	0.490623	0.999668
EnSpm-N2_BF	CMC-EnSpm	DNA	0.504071	0.505477	4.93917	0.418301	0.999668
EnSpm-N2_DR	CMC-EnSpm	DNA	-0.154491	-0.154711	5.95353	0.731903	0.999668
ERV1-10_DR-I	ERV1	LTR	-0.835698	-0.837726	5.06398	0.154088	0.999668
ERV1-1-EC_I-int	ERV1	LTR	-0.0593121	-0.0594955	5.04852	0.903581	0.999668
ERV1-1_Gav-I	ERV1	LTR	-0.320482	-0.321396	4.90323	0.403585	0.999668
ERV1-1-I_BT	ERV1	LTR	-0.492869	-0.49895	3.05691	0.448656	0.999668
ERV1-1-I_DR	ERV1	LTR	-0.687548	-0.687982	7.05423	0.0889987	0.999668
ERV1-1-I_Lch	LTR	LTR	-0.409334	-0.410601	4.7687	0.383413	0.999668
ERV1-1_OPr-I	ERV1	LTR	-0.0795092	-0.0795593	6.92136	0.81159	0.999668
ERV1-1_PVa-I	ERV1	LTR	0.485907	0.487162	5.05646	0.510738	0.999668
ERV1-1_SSc-I	ERV1	LTR	-0.0387566	-0.0387582	10.9544	0.858595	0.999668
ERV1-2_Gav-I	ERV1	LTR	0.025169	0.0251887	6.14609	0.946199	0.999668
ERV1-3_Crp-I	ERV1	LTR	-1.12953	-1.13531	4.23613	0.0569014	0.999668
ERV1-3-I_DR	ERV1	LTR	0.0494025	0.0494376	6.71891	0.922827	0.999668
ERV13_MD_I-int	ERV1	LTR	-0.217523	-0.217925	5.58982	0.669003	0.999668
ERV1-5-EC_I-int	ERVL	LTR	-1.08065	-1.08644	4.20559	0.201958	0.999668
ERV1-7_DR-I	ERV1	LTR	0.111898	0.112819	3.67757	0.831851	0.999668
ERV1-9N-I_ML	ERV1	LTR	0.0951385	0.0951407	11.839	0.807787	0.999668
ERV-1_CPB-LTR	ERV1	LTR	-0.143128	-0.143317	5.80652	0.72141	0.999668
ERV1_MD_I-int	ERVK	LTR	-0.0799204	-0.0803354	3.63471	0.89692	0.999668
ERV1-N3-I_DR	ERV	LTR	-0.0296187	-0.0296223	9.19471	0.904724	0.999668
ERV1-N6-I_DR	ERV1	LTR	0.195624	0.195707	7.58082	0.553147	0.999668
ERV1-N7-I_DR	ERV1	LTR	-0.214141	-0.214238	7.52627	0.636629	0.999668
ERV2-1_ET-I	ERVK	LTR	0.11463	0.115209	3.72952	0.843524	0.999668
ERV2-1_OG-I	ERVK	LTR	-0.140816	-0.142284	3.48343	0.808675	0.999668
ERV2-1_TSy-I	ERVK	LTR	0.112857	0.113078	5.51839	0.760672	0.999668
ERV2-2_Opr-I	ERVK	LTR	0.0758473	0.0761339	3.95752	0.894667	0.999668
ERV2-3_CPo-I	ERVK	LTR	-0.118644	-0.119679	3.26057	0.845905	0.999668
ERV2-3_FC-I	ERVK	LTR	-0.0688839	-0.0693499	4.03495	0.89936	0.999668
ERV23_MD_I-int	ERVK	LTR	-0.496035	-0.496717	5.87122	0.283653	0.999668
ERV24_MD_I-int	ERV1	LTR	-0.415086	-0.41585	5.53793	0.243149	0.999668
ERV24_Prim-int	ERV1	LTR	-1.45029	-1.47314	2.94285	0.0954028	0.999668
ERV2-4_TSy-I	ERVK	LTR	0.403532	0.406087	3.86253	0.519575	0.999668
ERV25a_MD_LTR	ERV1	LTR	-0.00954352	-0.00975575	3.68418	0.986066	0.999668
ERV2-5_Pca-I	ERVK	LTR	0.53136	0.534043	4.10562	0.353483	0.999668
ERV2B-CPo_I-int	ERVK	LTR	0.363332	0.364187	5.18444	0.459821	0.999668
ERV-2B_Crp-LTR	ERV1	LTR	-0.26758	-0.267595	10.5053	0.278303	0.999668
ERV-2_CPB-I	ERV1	LTR	-0.849006	-0.854132	3.93026	0.155452	0.999668
ERV-2_Crp-LTR	ERV1	LTR	-0.920778	-0.926101	3.98481	0.0429624	0.999668
ERV2N1-Mim_I-int	ERVK	LTR	-0.276958	-0.278494	4.07984	0.63494	0.999668
ERV2-N1_Opr-I	ERVK	LTR	0.746022	0.749347	4.32802	0.184789	0.999668
ERV3-1_CJ-I	ERVL	LTR	0.0757121	0.0763021	3.57495	0.907085	0.999668
ERV3-1-EC_I-int	ERVL	LTR	0.0354144	0.0354661	5.40978	0.94487	0.999668
ERV3-1-I_XT	ERVL	LTR	-1.00873	-1.01445	3.90004	0.145472	0.999668
ERV36_MD_I-int	ERVK	LTR	-0.390055	-0.391399	4.62571	0.347062	0.999668
ERV37_MD_I-int	ERV1	LTR	0.0766069	0.0770163	3.29928	0.891707	0.999668
ERV38_MD-int	ERV1	LTR	-0.295202	-0.295349	7.34797	0.284002	0.999668
ERV-3_AMi-LTR	ERV1	LTR	-0.260352	-0.261179	4.74011	0.584241	0.999668
ERV-3_LCh-I	LTR	LTR	-0.108881	-0.109475	3.88022	0.841562	0.999668
ERV-3_LCh-LTR	LTR	LTR	0.00680454	0.00660484	3.04417	0.994059	0.999668
ERV40_MD_I-int	ERV1	LTR	-0.237155	-0.237438	6.0941	0.535047	0.999668
ERV43_MD_I-int	ERVK	LTR	-1.0506	-1.0558	4.31391	0.156714	0.999668
ERV46_MD_I-int	ERVK	LTR	0.976123	0.983035	3.80366	0.245285	0.999668
ERV6B-MD_I-int	ERV1	LTR	0.303424	0.303862	5.81743	0.538718	0.999668
ERV-6_CPB-I	ERV1	LTR	-0.593805	-0.600142	3.1858	0.365159	0.999668
ERV-6_LCh-I	LTR	LTR	-0.0220384	-0.022407	3.44177	0.966819	0.999668
ERV6_MD_I-int	ERV1	LTR	-1.04665	-1.05159	4.19265	0.0859668	0.999668
ERV7_MD_I-int	ERVK	LTR	-0.237661	-0.238049	5.62892	0.60352	0.999668
ERV8N_MD_I-int	ERV1	LTR	0.120261	0.120336	7.11524	0.760175	0.999668
ERVB3_1-I_MM	ERVK	LTR	-0.859894	-0.864344	3.99911	0.145616	0.999668
Expander	RTE	LINE	0.0753057	0.075309	10.8371	0.728361	0.999668
EXPANDER1_DR	RTE	LINE	0.0965798	0.0965899	9.60085	0.667238	0.999668
Expander2	RTE	LINE	0.133049	0.133076	8.60039	0.604522	0.999668
FB4_DM	TcMar-Tc1	DNA	-0.770333	-0.77611	3.45435	0.342793	0.999668
FUGUREP2	Unknown	Unknown	0.131211	0.131215	11.374	0.561568	0.999668
FUGUREP4b	Unknown	Unknown	0.330937	0.332257	4.37696	0.530519	0.999668
Furousha2	hAT-Ac	DNA	-0.429519	-0.429927	6.41138	0.193963	0.999668
Galileo_DW	P	DNA	-0.558198	-0.559566	5.00279	0.348596	0.999668
GarnAlu3B	Alu	SINE	0.194233	0.195312	3.94028	0.783982	0.999668
GibRV1	ERVK	LTR	-0.42362	-0.427252	3.53959	0.456549	0.999668
Ginger1-10_HM	Ginger	DNA	-0.0784105	-0.0790886	3.87136	0.908552	0.999668
Ginger1-1_AC	Ginger	DNA	0.0199132	0.0199146	10.1908	0.928641	0.999668
Ginger1-1_DR	Ginger	DNA	0.568083	0.569402	5.18439	0.253814	0.999668
Ginger1-2_DR	Ginger	DNA	-0.107246	-0.107272	8.38844	0.675131	0.999668
Ginger1-2_HM	Ginger	DNA	0.404247	0.405388	4.88127	0.438779	0.999668
Ginger1-5_HM	Ginger	DNA	0.058323	0.0583313	9.16241	0.807003	0.999668
Ginger1-6_HM	Ginger	DNA	-0.203102	-0.203193	7.5337	0.65567	0.999668
Ginger1-7_HM	Ginger	DNA	-0.00726941	-0.00735398	3.43195	0.9902	0.999668
Ginger1-N1_DR	Ginger	DNA	0.285896	0.286236	6.09224	0.366807	0.999668
Ginger2-1_LS	Ginger	DNA	0.223583	0.224226	4.83656	0.752321	0.999668
Ginger2-N2_AP	Ginger	DNA	0.71029	0.719581	3.00414	0.253979	0.999668
Gyps2_I-int	Gypsy	LTR	-0.142189	-0.142321	6.3347	0.773649	0.999668
GYPSM1_I-int	Gypsy	LTR	-0.764947	-0.766031	5.88256	0.0856169	0.999668
GypsOL-int	Gypsy	LTR	0.245723	0.246366	5.02158	0.676984	0.999668
Gypsy-100_CQ-I	Gypsy	LTR	0.236116	0.237806	3.90334	0.676584	0.999668
Gypsy-101_AA-LTR	Gypsy	LTR	0.177055	0.177561	5.0021	0.689018	0.999668
Gypsy102-I_DR	Gypsy	LTR	-0.376082	-0.376535	6.14666	0.617888	0.999668
Gypsy-10_CGi-I	Gypsy	LTR	0.274889	0.275091	6.80046	0.588583	0.999668
Gypsy-10_CPB-I	Gypsy	LTR	0.506381	0.508174	4.61918	0.364866	0.999668
Gypsy-10_OD-I	Gypsy	LTR	-0.212965	-0.214144	3.86229	0.688344	0.999668
Gypsy-10_PBa-I	LTR	LTR	-0.634675	-0.641478	3.03559	0.321294	0.999668
Gypsy-110_DR-I	Gypsy	LTR	0.447785	0.448212	6.45232	0.272222	0.999668
Gypsy117-I_DR	Gypsy	LTR	1.10389	1.11213	3.72144	0.164016	0.999668
Gypsy118-LTR_DR	Gypsy	LTR	-0.0309309	-0.0309378	8.66762	0.908192	0.999668
Gypsy119-I_DR	Gypsy	LTR	-0.471129	-0.472677	4.64293	0.299184	0.999668
Gypsy-11_DPu-I	Gypsy	LTR	0.707374	0.713043	3.53951	0.314745	0.999668
Gypsy-11_DTa-LTR	Gypsy	LTR	-0.292291	-0.292877	5.30382	0.496063	0.999668
Gypsy-11_GA-I	Gypsy	LTR	0.0964873	0.0970324	3.9717	0.881899	0.999668
Gypsy11-I_DR	Gypsy	LTR	-0.746831	-0.749315	4.62057	0.168325	0.999668
Gypsy-11_IS-I	Gypsy	LTR	-0.59705	-0.600452	4.06271	0.464837	0.999668
Gypsy11-NVi_I-int	Gypsy	LTR	0.230295	0.230622	5.81782	0.61317	0.999668
Gypsy120-I_DR	Gypsy	LTR	0.033573	0.0336524	4.38171	0.950947	0.999668
Gypsy120-LTR_DR	Gypsy	LTR	-0.116305	-0.116328	8.70372	0.645551	0.999668
Gypsy122-I_DR	Gypsy	LTR	0.520591	0.52399	3.75149	0.440183	0.999668
Gypsy122-LTR_DR	Gypsy	LTR	0.0247893	0.0248467	5.69778	0.946289	0.999668
Gypsy-124_AA-LTR	Gypsy	LTR	-0.513602	-0.513866	7.3117	0.254254	0.999668
Gypsy-126_DR-LTR	Gypsy	LTR	0.487346	0.489483	4.297	0.377123	0.999668
Gypsy127-I_DR	Gypsy	LTR	0.324849	0.325174	6.36579	0.562315	0.999668
Gypsy-128_AA-I	Gypsy	LTR	0.681147	0.685745	3.79228	0.28561	0.999668
Gypsy-12_Adi-I	Gypsy	LTR	0.300289	0.302707	3.41561	0.681905	0.999668
Gypsy-12_CPB-I	Gypsy	LTR	0.481493	0.487603	2.91394	0.555125	0.999668
Gypsy-12_DWil-I	Gypsy	LTR	-0.11809	-0.118444	4.55648	0.817907	0.999668
Gypsy12-I_Dpse	Gypsy	LTR	-0.106503	-0.10667	5.76479	0.844263	0.999668
Gypsy-132_AA-I	Gypsy	LTR	-0.649339	-0.654276	3.54002	0.405328	0.999668
Gypsy132-I_DR	Gypsy	LTR	0.328436	0.330115	4.04154	0.593455	0.999668
Gypsy133-I_DR	Gypsy	LTR	-0.790938	-0.795703	3.78773	0.279802	0.999668
Gypsy134-LTR_DR	Gypsy	LTR	-1.57552	-1.58065	4.76525	0.0507407	0.999668
Gypsy136-I_DR	Gypsy	LTR	-0.239437	-0.240683	4.21868	0.70389	0.999668
Gypsy-137_AA-I	Gypsy	LTR	-1.12334	-1.12657	4.92386	0.0415475	0.999668
Gypsy138-I_DR	Gypsy	LTR	-0.068009	-0.0693035	3.13683	0.913456	0.999668
Gypsy-13_CFl-I	LTR	LTR	-0.111783	-0.113551	2.9252	0.855199	0.999668
Gypsy-13_LCh-I	LTR	LTR	0.865968	0.871047	3.9798	0.258903	0.999668
Gypsy-13_PBa-I	LTR	LTR	0.197546	0.199282	3.23797	0.737638	0.999668
Gypsy141-I_DR	Gypsy	LTR	0.405548	0.405834	6.86448	0.174281	0.999668
Gypsy144-I_DR	Gypsy	LTR	-0.409048	-0.412338	3.60582	0.559643	0.999668
Gypsy146-I_DR	Gypsy	LTR	0.483164	0.487935	3.21547	0.456706	0.999668
Gypsy147-I_DR	Gypsy	LTR	-0.611598	-0.611928	7.29821	0.29958	0.999668
Gypsy149-I_DR	Gypsy	LTR	0.20097	0.202298	3.64641	0.746371	0.999668
Gypsy-14_CPB-I	Gypsy	LTR	-0.141965	-0.142497	4.67405	0.785713	0.999668
Gypsy-14_DWil-I	Gypsy	LTR	0.261574	0.263032	3.94454	0.57088	0.999668
Gypsy-14-I_HM	Gypsy	LTR	-0.478479	-0.479439	5.38964	0.267511	0.999668
Gypsy14-I_SP	Gypsy	LTR	-0.399723	-0.403132	3.23083	0.564171	0.999668
Gypsy-14_LCh-I	LTR	LTR	0.056752	0.0570375	4.4607	0.908546	0.999668
Gypsy14-LTR_Dpse	Gypsy	LTR	-0.660322	-0.662174	4.88174	0.248161	0.999668
Gypsy14-NVi_I-int	Gypsy	LTR	-0.0420807	-0.0421706	5.45694	0.899369	0.999668
Gypsy153-I_DR	Gypsy	LTR	-0.018058	-0.0184569	3.74638	0.973121	0.999668
Gypsy158-I_DR	Gypsy	LTR	-0.741883	-0.743883	4.97762	0.116104	0.999668
Gypsy-15_DBp-LTR	Gypsy	LTR	1.1369	1.15118	3.0247	0.0950297	0.999668
Gypsy-15_DEl-I	Gypsy	LTR	-0.820616	-0.824957	4.13894	0.264819	0.999668
Gypsy-15-I_DR	Gypsy	LTR	-0.493495	-0.495288	4.54462	0.437534	0.999668
Gypsy-15_PBa-I	LTR	LTR	-1.27859	-1.2988	2.68714	0.0569495	0.999668
Gypsy-15_XT-I	Gypsy	LTR	-0.175648	-0.177164	3.59546	0.809478	0.999668
Gypsy160-I_DR	Gypsy	LTR	0.464125	0.465314	5.04823	0.322345	0.999668
Gypsy163-I_DR	Gypsy	LTR	0.728342	0.732216	4.05359	0.184056	0.999668
Gypsy-165-I_DR	Gypsy	LTR	0.158161	0.158965	3.85348	0.757848	0.999668
Gypsy-16_Adi-I	Gypsy	LTR	-0.1544	-0.155137	4.3675	0.780191	0.999668
Gypsy-16_DBp-I	Gypsy	LTR	-0.400193	-0.402682	3.85691	0.481865	0.999668
Gypsy-16_GA-I	Gypsy	LTR	0.494829	0.497266	4.1545	0.480771	0.999668
Gypsy16-I_AG	Gypsy	LTR	-1.18857	-1.19604	3.79061	0.102563	0.999668
Gypsy-16-I_DR	Gypsy	LTR	0.395937	0.398119	4.06975	0.366875	0.999668
Gypsy-16_PBa-LTR	LTR	LTR	-0.632005	-0.641728	2.88514	0.442722	0.999668
Gypsy-171_DR-I	Gypsy	LTR	0.638198	0.63863	6.9722	0.111613	0.999668
Gypsy-173_DR-I	Gypsy	LTR	0.20264	0.203868	3.80503	0.69666	0.999668
Gypsy-176_DR-I	Gypsy	LTR	-0.178833	-0.179917	3.56727	0.770625	0.999668
Gypsy-179_DR-I	Gypsy	LTR	-0.00867648	-0.00873099	4.96481	0.986702	0.999668
Gypsy-17_AA-I	Gypsy	LTR	0.45098	0.455405	3.18973	0.41265	0.999668
Gypsy-17_DAn-I	Gypsy	LTR	0.192438	0.192741	5.67787	0.623073	0.999668
Gypsy-17_GA-I	Gypsy	LTR	0.470469	0.472048	4.64499	0.366507	0.999668
Gypsy-17-I_XT	Gypsy	LTR	-0.187809	-0.188269	5.12752	0.757824	0.999668
Gypsy-17_XT-I	Gypsy	LTR	-1.04112	-1.04477	4.53293	0.236134	0.999668
Gypsy-180_AA-I	Gypsy	LTR	0.146098	0.147253	3.3903	0.789594	0.999668
Gypsy-182_AA-I	Gypsy	LTR	-0.0899062	-0.0911363	3.00256	0.888201	0.999668
Gypsy-182_DR-I	Gypsy	LTR	0.102034	0.10213	6.35413	0.781896	0.999668
Gypsy-188_DR-I	Gypsy	LTR	0.626027	0.628053	4.80028	0.32546	0.999668
Gypsy-18B_PBa-I	LTR	LTR	0.271178	0.271199	10.0214	0.25395	0.999668
Gypsy-18_Crp-I	Gypsy	LTR	0.481403	0.483485	4.30721	0.395458	0.999668
Gypsy-18-I_DR	Gypsy	LTR	-1.21661	-1.22106	4.68134	0.0775174	0.999668
Gypsy18-I_Dya	Gypsy	LTR	0.356891	0.357587	5.38704	0.460332	0.999668
Gypsy-18_LCh-I	LTR	LTR	-0.122648	-0.12276	6.37969	0.767671	0.999668
Gypsy-18_PBa-I	LTR	LTR	0.500973	0.503407	4.14733	0.382468	0.999668
Gypsy-190_DR-I	Gypsy	LTR	0.698514	0.703443	3.71659	0.328945	0.999668
Gypsy-192_DR-I	Gypsy	LTR	-0.199636	-0.200939	3.68436	0.749698	0.999668
Gypsy-198_DR-I	Gypsy	LTR	0.482588	0.487718	3.17034	0.429948	0.999668
Gypsy-19_Ano-I	Gypsy	LTR	0.368766	0.372123	3.26269	0.550551	0.999668
Gypsy-19_CGi-I	Gypsy	LTR	0.718175	0.718986	6.23997	0.0381702	0.999668
Gypsy-19_CPB-I	Gypsy	LTR	0.471074	0.473992	3.82882	0.465486	0.999668
Gypsy-19_CSa-I	LTR	LTR	0.391594	0.392072	6.09211	0.476976	0.999668
Gypsy-19_GA-I	Gypsy	LTR	0.639065	0.643475	3.70371	0.225327	0.999668
Gypsy-1_AC-I	Gypsy	LTR	-0.0643393	-0.0643499	8.89031	0.816582	0.999668
Gypsy-1_FR-I	Gypsy	LTR	0.151388	0.151616	5.71769	0.656023	0.999668
Gypsy-1_HAS-LTR	Gypsy	LTR	-0.0610286	-0.0618722	3.45151	0.906202	0.999668
Gypsy1-I_GA	Gypsy	LTR	-0.83645	-0.848502	2.85157	0.236035	0.999668
Gypsy1-NVi_I-int	Gypsy	LTR	-1.10802	-1.1102	5.41976	0.0852981	0.999668
Gypsy-1_XT-I	Gypsy	LTR	0.189434	0.190554	3.54677	0.739176	0.999668
Gypsy-201_DR-I	Gypsy	LTR	0.0826036	0.0828402	4.45386	0.882161	0.999668
Gypsy-201_DR-LTR	Gypsy	LTR	-1.55438	-1.5672	3.43495	0.0653699	0.999668
Gypsy-206_DR-I	Gypsy	LTR	0.105506	0.105537	8.02111	0.711481	0.999668
Gypsy-207_DR-I	Gypsy	LTR	-0.37084	-0.373714	3.61078	0.640471	0.999668
Gypsy-208_DR-I	Gypsy	LTR	0.0173685	0.0175244	4.55333	0.97002	0.999668
Gypsy-20_CPB-I	Gypsy	LTR	0.405414	0.407108	4.35944	0.549031	0.999668
Gypsy-20_GA-I	Gypsy	LTR	0.547674	0.550322	4.18137	0.393321	0.999668
Gypsy-20_IS-I	Gypsy	LTR	-0.357063	-0.358362	4.62396	0.546213	0.999668
Gypsy-210_DR-I	Gypsy	LTR	-0.0812297	-0.0813475	5.78699	0.873255	0.999668
Gypsy-213_AA-I	Gypsy	LTR	-0.819891	-0.823458	4.2175	0.221262	0.999668
Gypsy-217_AA-I	Gypsy	LTR	0.0377037	0.0378079	4.33611	0.941462	0.999668
Gypsy-217_DR-I	Gypsy	LTR	0.86619	0.875111	3.2477	0.215796	0.999668
Gypsy-219_DR-I	Gypsy	LTR	0.870366	0.875124	4.08134	0.259807	0.999668
Gypsy-21_GA-I	Gypsy	LTR	-0.790061	-0.791932	5.12089	0.198835	0.999668
Gypsy-21_Gav-I	Gypsy	LTR	0.541639	0.545353	3.70073	0.428775	0.999668
Gypsy-21-I_DR	Gypsy	LTR	-0.333517	-0.335165	4.21859	0.529877	0.999668
Gypsy-21_LCh-I	LTR	LTR	0.474518	0.475791	4.97151	0.342129	0.999668
Gypsy-21_PBa-LTR	LTR	LTR	-0.651194	-0.65273	5.16604	0.133364	0.999668
Gypsy-224_DR-LTR	Gypsy	LTR	-0.111345	-0.111643	4.9252	0.831756	0.999668
Gypsy-225_DR-LTR	Gypsy	LTR	0.0471506	0.0472395	3.8317	0.935161	0.999668
Gypsy-226_DR-I	Gypsy	LTR	0.437957	0.438351	6.52269	0.263513	0.999668
Gypsy-226_DR-LTR	Gypsy	LTR	0.0531829	0.0531933	8.63491	0.884069	0.999668
Gypsy-22_DWil-I	Gypsy	LTR	-0.0052601	-0.00526247	7.82275	0.99365	0.999668
Gypsy-22_DY-I	Gypsy	LTR	-0.432816	-0.43432	4.69697	0.368011	0.999668
Gypsy-22_GA-LTR	Gypsy	LTR	-0.776533	-0.780202	4.14238	0.13712	0.999668
Gypsy-230_AA-I	Gypsy	LTR	-0.0931108	-0.0932453	5.75275	0.836613	0.999668
Gypsy-233_DR-I	Gypsy	LTR	0.587689	0.589414	4.85714	0.231294	0.999668
Gypsy-238_AA-I	Gypsy	LTR	-0.750716	-0.753197	4.59949	0.215285	0.999668
Gypsy-23_DEl-I	Gypsy	LTR	-0.355844	-0.355999	7.53453	0.351488	0.999668
Gypsy-23_GA-I	Gypsy	LTR	1.03669	1.04672	3.40956	0.26104	0.999668
Gypsy-23-I_DR	Gypsy	LTR	0.0970643	0.0972966	4.90282	0.85565	0.999668
Gypsy-23-I_NVi	Gypsy	LTR	-0.45357	-0.454763	5.02226	0.234385	0.999668
Gypsy-246_AA-I	Gypsy	LTR	-0.192343	-0.19404	3.36702	0.784061	0.999668
Gypsy-24_DEl-I	Gypsy	LTR	0.0593469	0.0594133	6.05856	0.911085	0.999668
Gypsy24-I_Dpse	Gypsy	LTR	-0.331366	-0.334459	3.40777	0.587284	0.999668
Gypsy-25_CGi-I	Gypsy	LTR	-0.968321	-0.972887	4.16671	0.0874652	0.999668
Gypsy25-I_AG	Gypsy	LTR	0.241127	0.241267	7.13489	0.653068	0.999668
Gypsy-25_LH-LTR	LTR	LTR	-0.873215	-0.874577	5.72117	0.159065	0.999668
Gypsy-25-LTR_DR	Gypsy	LTR	0.449053	0.449456	6.51948	0.190808	0.999668
Gypsy-25_PM-I	Gypsy	LTR	-0.976591	-0.983671	3.65174	0.137096	0.999668
Gypsy-26_Adi-I	LTR	LTR	-0.433195	-0.435436	3.95587	0.446245	0.999668
Gypsy-26_Adi-LTR	Gypsy	LTR	0.268232	0.268387	7.12438	0.525786	0.999668
Gypsy-26B_AMi-LTR	Gypsy	LTR	0.192986	0.195	3.02952	0.773321	0.999668
Gypsy-26_CSa-I	Gypsy	LTR	-0.312693	-0.312908	6.94032	0.357221	0.999668
Gypsy-26_GA-I	Gypsy	LTR	-0.810017	-0.811181	5.86521	0.102472	0.999668
Gypsy-27_DP-I	Gypsy	LTR	-0.315887	-0.316845	4.79269	0.571191	0.999668
Gypsy-27_GA-I	Gypsy	LTR	0.122004	0.122276	5.15918	0.81981	0.999668
Gypsy27-I_AG	Gypsy	LTR	0.361171	0.362092	5.01684	0.473086	0.999668
Gypsy-28_DPu-I	Gypsy	LTR	0.833237	0.844187	2.92554	0.208171	0.999668
Gypsy-29_DPu-I	Gypsy	LTR	0.576355	0.580875	3.59062	0.477126	0.999668
Gypsy-29_GA-I	Gypsy	LTR	-0.0901906	-0.0903168	5.86546	0.794336	0.999668
Gypsy-29-I_DR	Gypsy	LTR	0.0509238	0.0511118	3.87215	0.924406	0.999668
Gypsy-2_DEl-I	Gypsy	LTR	-1.05444	-1.06342	3.38024	0.226375	0.999668
Gypsy-2_GA-I	Gypsy	LTR	-0.503664	-0.508733	3.19453	0.364923	0.999668
Gypsy-2_LCh-I	LTR	LTR	-0.32848	-0.332001	3.23786	0.623348	0.999668
Gypsy-2_PPc-I	Gypsy	LTR	0.585488	0.588366	4.16886	0.31077	0.999668
Gypsy-30_CGi-I	Gypsy	LTR	0.413892	0.414741	5.33105	0.414937	0.999668
Gypsy-30_CPB-I	Gypsy	LTR	-0.229588	-0.229658	8.0443	0.657538	0.999668
Gypsy-30_GA-I	ERV1	LTR	0.173074	0.173622	4.68346	0.749845	0.999668
Gypsy-30-I_DR	Gypsy	LTR	0.682111	0.686166	3.90793	0.223626	0.999668
Gypsy-31_GA-I	Gypsy	LTR	1.06742	1.07769	3.41245	0.0736015	0.999668
Gypsy-31-I_DR	Gypsy	LTR	0.412874	0.414986	4.10366	0.559872	0.999668
Gypsy3-1-I_Lch	LTR	LTR	0.335389	0.337033	4.10239	0.572411	0.999668
Gypsy-31-LTR_DR	Gypsy	LTR	-0.41923	-0.419303	8.86847	0.167801	0.999668
Gypsy-31_SI-I	LTR	LTR	-0.54971	-0.551407	4.80718	0.163749	0.999668
Gypsy-32_CPB-I	Gypsy	LTR	-0.284318	-0.286753	3.4368	0.685909	0.999668
Gypsy-33_GA-I	Gypsy	LTR	-0.0569909	-0.0570044	8.46253	0.825667	0.999668
Gypsy-34_DEl-I	Gypsy	LTR	-0.165829	-0.165957	6.65299	0.667455	0.999668
Gypsy-34_GA-I	Gypsy	LTR	0.215005	0.215305	5.82659	0.607442	0.999668
Gypsy-34_GA-LTR	Gypsy	LTR	0.429885	0.430698	5.47928	0.307045	0.999668
Gypsy-34_NVi-I	Gypsy	LTR	0.129411	0.129459	7.78193	0.774446	0.999668
Gypsy-35_GA-I	Gypsy	LTR	-0.487293	-0.491381	3.50163	0.453364	0.999668
Gypsy35-I_DR	Gypsy	LTR	1.06971	1.08219	3.14611	0.155205	0.999668
Gypsy-36_DAn-I	Gypsy	LTR	-0.0292	-0.0292119	7.72052	0.931276	0.999668
Gypsy-36_DPu-I	Gypsy	LTR	0.0181379	0.0181814	4.55887	0.965208	0.999668
Gypsy-36_GA-I	Gypsy	LTR	-0.77887	-0.779928	5.93285	0.10021	0.999668
Gypsy-36_OD-I	Gypsy	LTR	0.249628	0.250951	4.03578	0.59491	0.999668
Gypsy-37_AA-LTR	Gypsy	LTR	0.0912248	0.0913212	6.17005	0.863179	0.999668
Gypsy-37_CQ-I	Gypsy	LTR	0.600126	0.60151	5.22043	0.206399	0.999668
Gypsy37-I_AG	Gypsy	LTR	-0.136314	-0.136404	6.81604	0.725895	0.999668
Gypsy37-I_DR	Gypsy	LTR	0.399424	0.401257	4.17791	0.412643	0.999668
Gypsy-38_DWil-I	Gypsy	LTR	0.775131	0.782493	3.3401	0.228248	0.999668
Gypsy-38_GA-I	Gypsy	LTR	0.130805	0.131615	3.38719	0.820917	0.999668
Gypsy-38_NVi-LTR	Gypsy	LTR	-0.14592	-0.14597	7.86554	0.600581	0.999668
Gypsy-39_CQ-I	Gypsy	LTR	0.0809301	0.0809877	6.6966	0.809372	0.999668
Gypsy-39_GA-I	Gypsy	LTR	-1.06327	-1.06775	4.32732	0.098799	0.999668
Gypsy39-I_DR	Gypsy	LTR	-0.369373	-0.372212	3.66196	0.562008	0.999668
Gypsy-3_DGri-I	Gypsy	LTR	-0.307032	-0.308372	4.29796	0.494437	0.999668
GYPSY3-I_CB	Gypsy	LTR	0.37901	0.379529	5.952	0.418154	0.999668
Gypsy3-LTR_AP	Gypsy	LTR	-0.285708	-0.28842	3.4562	0.682704	0.999668
Gypsy-3_PBa-I	LTR	LTR	0.189198	0.18922	9.40687	0.432831	0.999668
Gypsy-40_GA-I	Gypsy	LTR	0.216767	0.219045	3.03541	0.78645	0.999668
Gypsy40-I_DR	Gypsy	LTR	-0.261325	-0.262947	3.97022	0.633389	0.999668
Gypsy-41_GA-I	Gypsy	LTR	0.0502322	0.0503926	4.59832	0.919671	0.999668
Gypsy-42_GA-I	Gypsy	LTR	-0.200494	-0.200525	9.01802	0.401845	0.999668
Gypsy-43_CGi-I	Gypsy	LTR	-0.7396	-0.746895	3.27753	0.307046	0.999668
Gypsy-43_DWil-I	Gypsy	LTR	-0.434862	-0.435508	5.76538	0.362818	0.999668
Gypsy44-LTR_DR	Gypsy	LTR	0.299163	0.299561	5.96864	0.425715	0.999668
Gypsy-46_GA-I	Gypsy	LTR	-0.192598	-0.193388	4.36599	0.721242	0.999668
Gypsy-47_DWil-I	Gypsy	LTR	-0.17093	-0.171282	5.42643	0.665691	0.999668
Gypsy47-I_DR	Gypsy	LTR	0.200482	0.200555	7.81559	0.465226	0.999668
Gypsy-49_CGi-I	Gypsy	LTR	0.539619	0.541782	4.38959	0.295933	0.999668
Gypsy-49_DEl-I	Gypsy	LTR	-0.629373	-0.629792	6.94229	0.216296	0.999668
Gypsy49-I_DR	Gypsy	LTR	0.495045	0.498985	3.44439	0.437759	0.999668
Gypsy-4_DSim-I	Gypsy	LTR	-0.233486	-0.237302	2.85701	0.739388	0.999668
Gypsy-4_GA-I	Gypsy	LTR	-0.162699	-0.163532	4.09926	0.770096	0.999668
Gypsy-4_OD-I	Gypsy	LTR	-0.441251	-0.442323	5.06657	0.281001	0.999668
Gypsy-4_XT-I	Gypsy	LTR	0.365236	0.369606	2.9422	0.616023	0.999668
Gypsy-50_DWil-I	Gypsy	LTR	0.220036	0.22097	4.30887	0.676824	0.999668
Gypsy-50_GA-LTR	Gypsy	LTR	-0.105418	-0.105525	6.31647	0.762732	0.999668
Gypsy-51_GA-LTR	Gypsy	LTR	-0.379941	-0.380113	7.4857	0.322934	0.999668
Gypsy51-I_DR	Gypsy	LTR	0.519075	0.519988	5.57622	0.365611	0.999668
Gypsy-52_DWil-I	Gypsy	LTR	0.489348	0.490638	4.99335	0.267748	0.999668
Gypsy-52_GA-I	Gypsy	LTR	0.319073	0.321737	3.40593	0.592187	0.999668
Gypsy-53_PM-LTR	Gypsy	LTR	-0.640866	-0.645228	3.54695	0.357397	0.999668
Gypsy-54_GA-I	Gypsy	LTR	0.464634	0.465709	5.18008	0.371504	0.999668
Gypsy-55_CGi-I	Gypsy	LTR	-0.412297	-0.412582	6.8677	0.270126	0.999668
Gypsy55-I_DR	Gypsy	LTR	-0.302374	-0.302968	5.47002	0.461907	0.999668
Gypsy-55-I_NV	Gypsy	LTR	-0.108072	-0.108086	9.30937	0.651756	0.999668
Gypsy-56_GA-I	Gypsy	LTR	-0.181337	-0.181683	5.51131	0.807005	0.999668
Gypsy56-I_DR	Gypsy	LTR	0.337604	0.337896	6.57214	0.510985	0.999668
Gypsy57-I_AG	Gypsy	LTR	-0.440823	-0.442947	4.13097	0.422474	0.999668
Gypsy57-I_DR	Gypsy	LTR	-0.00570133	-0.00618552	3.30538	0.991413	0.999668
Gypsy58-I_DR	Gypsy	LTR	-0.842105	-0.846503	4.07538	0.113506	0.999668
Gypsy-5_AA-LTR	Gypsy	LTR	-0.0845906	-0.0849569	4.555	0.865279	0.999668
Gypsy-5_DBp-I	Gypsy	LTR	-0.166327	-0.166513	6.19185	0.597405	0.999668
Gypsy-5_DEl-I	Gypsy	LTR	0.157003	0.157605	4.41281	0.771587	0.999668
Gypsy-5_DGri-I	Gypsy	LTR	1.26543	1.27451	3.85714	0.0599708	0.999668
Gypsy5_I-int	Gypsy	LTR	-0.110454	-0.111304	3.47882	0.883923	0.999668
Gypsy5-I_SP	Gypsy	LTR	1.27979	1.29965	2.85307	0.139094	0.999668
Gypsy-614_AA-I	Gypsy	LTR	0.395908	0.397001	4.91185	0.453258	0.999668
Gypsy-61_CGi-I	Gypsy	LTR	-0.315774	-0.317923	3.81223	0.546316	0.999668
Gypsy61-I_AG	Gypsy	LTR	0.0784578	0.0784935	7.5086	0.78696	0.999668
Gypsy61-I_DR	Gypsy	LTR	0.130817	0.131431	3.95276	0.850306	0.999668
Gypsy-624_AA-I	Gypsy	LTR	1.23996	1.25221	3.38649	0.0418997	0.999668
Gypsy-62_CQ-I	Gypsy	LTR	-0.242277	-0.242605	5.83469	0.630687	0.999668
Gypsy-62_DWil-I	Gypsy	LTR	0.442388	0.446362	3.32517	0.527612	0.999668
Gypsy-63_CQ-I	Gypsy	LTR	-0.0932986	-0.0938122	4.05021	0.863428	0.999668
Gypsy63-I_DR	Gypsy	LTR	0.55063	0.552595	4.56915	0.271889	0.999668
Gypsy64-I_DR	Gypsy	LTR	-0.941489	-0.94719	3.80391	0.169939	0.999668
Gypsy-66_AA-I	Gypsy	LTR	0.79205	0.793559	5.56053	0.061637	0.999668
Gypsy68-I_AG	Gypsy	LTR	0.00350854	0.00350867	6.83684	0.99078	0.999668
Gypsy-69_PM-I	Gypsy	LTR	1.08739	1.09457	3.90345	0.144428	0.999668
Gypsy-6_AA-I	Gypsy	LTR	0.596255	0.597027	6.03846	0.307364	0.999668
Gypsy-6_AEc-LTR	LTR	LTR	-0.198853	-0.19891	8.1539	0.476468	0.999668
Gypsy-6_AMi-I	Gypsy	LTR	0.307669	0.310809	3.19555	0.584805	0.999668
Gypsy-6_BM-I	Gypsy	LTR	1.22651	1.23979	3.2551	0.0698868	0.999668
Gypsy-6_DBp-I	Gypsy	LTR	0.0273987	0.0274246	4.77283	0.960801	0.999668
Gypsy-6_DGri-I	Gypsy	LTR	0.056052	0.0561723	4.72955	0.914062	0.999668
Gypsy-6_GA-I	ERV1	LTR	0.333962	0.334651	5.30973	0.418703	0.999668
Gypsy6-I_DR	Gypsy	LTR	0.515996	0.519021	3.90602	0.412046	0.999668
Gypsy-6_IS-I	Gypsy	LTR	-0.740659	-0.74642	3.51586	0.231018	0.999668
Gypsy-6_LCh-I	LTR	LTR	0.582519	0.585537	4.07278	0.246731	0.999668
Gypsy70-I_DR	Gypsy	LTR	0.167486	0.16848	3.65402	0.803075	0.999668
Gypsy-71_CGi-I	Gypsy	LTR	-1.25102	-1.26072	3.5725	0.0497079	0.999668
Gypsy-71_CQ-LTR	Gypsy	LTR	-0.236039	-0.238322	3.37411	0.70711	0.999668
Gypsy71-I_DR	Gypsy	LTR	-0.29084	-0.291388	5.4989	0.634365	0.999668
Gypsy73-I_DR	Gypsy	LTR	0.132561	0.133001	4.48993	0.820383	0.999668
Gypsy75-I_DR	Gypsy	LTR	0.362389	0.363149	5.34618	0.615987	0.999668
Gypsy-78-I_NV	Gypsy	LTR	0.685488	0.693592	3.01791	0.320721	0.999668
Gypsy-7_DAn-I	Gypsy	LTR	0.395796	0.40024	3.04322	0.466241	0.999668
Gypsy-7_DEl-I	Gypsy	LTR	0.0827398	0.0827989	6.76642	0.861899	0.999668
Gypsy7-I_DR	Gypsy	LTR	0.514537	0.51838	3.57422	0.40021	0.999668
Gypsy-7-I_XT	Gypsy	LTR	-0.0226748	-0.0233703	3.27863	0.971759	0.999668
Gypsy-7_PPc-I	Gypsy	LTR	0.0371087	0.0371757	3.99119	0.940905	0.999668
Gypsy80-I_DR	Gypsy	LTR	0.232801	0.233452	4.88442	0.594665	0.999668
Gypsy-82_CQ-I	Gypsy	LTR	-0.031166	-0.0311817	6.71161	0.923546	0.999668
Gypsy82-LTR_Dr	Gypsy	LTR	0.200436	0.200474	8.73495	0.470589	0.999668
Gypsy85-I_DR	Gypsy	LTR	0.18498	0.185324	5.4786	0.715977	0.999668
Gypsy-87_AA-I	Gypsy	LTR	-0.390905	-0.393133	4.04142	0.478147	0.999668
Gypsy-87_CQ-I	Gypsy	LTR	0.226601	0.226666	8.16596	0.398621	0.999668
Gypsy-88_AA-I	Gypsy	LTR	0.413996	0.416105	4.07907	0.395425	0.999668
Gypsy-88_CQ-I	Gypsy	LTR	-1.61689	-1.62928	3.59189	0.0692236	0.999668
Gypsy89-I_DR	Gypsy	LTR	-0.241672	-0.243676	3.62592	0.678042	0.999668
Gypsy-8_AA-I	Gypsy	LTR	0.307105	0.310074	3.14817	0.590221	0.999668
Gypsy-8_AMi-I	Gypsy	LTR	0.147649	0.148604	3.9444	0.804955	0.999668
Gypsy-8_AMi-LTR	Gypsy	LTR	0.258511	0.259224	4.90726	0.65151	0.999668
Gypsy-8_DAn-I	Gypsy	LTR	-0.280417	-0.280839	5.72358	0.493816	0.999668
Gypsy-8_DAn-LTR	Gypsy	LTR	0.116078	0.11649	4.69458	0.79061	0.999668
Gypsy-8_DPer-LTR	Gypsy	LTR	-0.695689	-0.699686	3.88947	0.279355	0.999668
Gypsy-8_DVir-I	Gypsy	LTR	0.110285	0.110545	4.99822	0.831492	0.999668
Gypsy8-I_Dpse	Gypsy	LTR	0.212424	0.21256	7.01256	0.528375	0.999668
Gypsy-90_CQ-I	Gypsy	LTR	0.0299416	0.0299929	4.04696	0.95846	0.999668
Gypsy92-I_DR	Gypsy	LTR	0.793004	0.794868	5.20978	0.140329	0.999668
Gypsy94-I_DR	Gypsy	LTR	-0.461498	-0.462773	4.9446	0.33583	0.999668
Gypsy98-I_Dr	Gypsy	LTR	0.176048	0.177267	3.53261	0.744836	0.999668
Gypsy-9_AC-I	Gypsy	LTR	-0.125045	-0.126101	3.70534	0.839588	0.999668
Gypsy-9_CFl-I	LTR	LTR	-0.387458	-0.390959	3.50136	0.591851	0.999668
Gypsy-9_Crp-I	Gypsy	LTR	-0.0835154	-0.0840248	3.81976	0.909638	0.999668
Gypsy-9_CSa-I	Gypsy	LTR	-0.22372	-0.224683	4.36101	0.72996	0.999668
Gypsy-9_DAn-I	Gypsy	LTR	0.0139277	0.0139215	4.50872	0.979247	0.999668
Gypsy-9_GA-I	Gypsy	LTR	-0.315048	-0.315418	6.12756	0.401779	0.999668
Gypsy9-I_SP	Gypsy	LTR	0.0927087	0.0928882	5.2237	0.86577	0.999668
Gypsy9-LTR_DR	Gypsy	LTR	0.666243	0.669819	4.04875	0.306694	0.999668
Gypsy-9_OD-I	Gypsy	LTR	0.500551	0.501958	4.90896	0.307739	0.999668
Gypsy-9_OD-LTR	Gypsy	LTR	0.0159326	0.0159407	6.9098	0.976028	0.999668
HAL1-2a_MD	L1	LINE	0.620959	0.627248	3.1946	0.367221	0.999668
HAL1-3A_ME	L1	LINE	0.428817	0.430443	4.46213	0.421884	0.999668
HAL1-3C_Cpo	L1	LINE	-0.196063	-0.196733	4.51692	0.662256	0.999668
HAL1-3_ME	L1	LINE	0.0936438	0.0937866	5.6417	0.807777	0.999668
HAL1ME	L1	LINE	-0.00386224	-0.00393947	4.58406	0.993785	0.999668
Harbinger-1_ADi	PIF-Harbinger	DNA	-0.347277	-0.349417	3.9356	0.541723	0.999668
Harbinger-1_DR	PIF-Harbinger	DNA	-0.131284	-0.131316	8.40711	0.637399	0.999668
Harbinger1_DR	PIF-Harbinger	DNA	0.542503	0.546041	3.74694	0.308015	0.999668
Harbinger-1_GA	PIF-Harbinger	DNA	0.297233	0.297316	8.18867	0.255195	0.999668
Harbinger-1_LMi	PIF-Harbinger	DNA	-0.113368	-0.114943	3.02026	0.85392	0.999668
Harbinger-1_XT	PIF-Harbinger	DNA	-0.11673	-0.117305	4.34071	0.872909	0.999668
Harbinger-2C_CPB	Harbinger	DNA	0.226195	0.226893	4.70713	0.643883	0.999668
Harbinger-2_DR	PIF-Harbinger	DNA	0.476296	0.478304	4.32814	0.381517	0.999668
Harbinger-2_GA	PIF-Harbinger	DNA	0.762111	0.769975	3.19178	0.285118	0.999668
Harbinger-2_LCh	DNA	DNA	-0.222838	-0.22323	5.66167	0.670462	0.999668
Harbinger-2N1_DR	PIF-Harbinger	DNA	0.0810098	0.0810242	8.84127	0.746425	0.999668
Harbinger-2_XT	PIF-Harbinger	DNA	0.059707	0.059753	6.57813	0.907096	0.999668
Harbinger-3_DR	PIF-Harbinger	DNA	0.823464	0.828577	3.93316	0.161337	0.999668
Harbinger-3N2_DR	PIF-Harbinger	DNA	-0.0131936	-0.0135612	3.01375	0.983388	0.999668
Harbinger-4_BF	PIF-Harbinger	DNA	-0.593965	-0.596229	4.36253	0.343029	0.999668
Harbinger-4_LCh	DNA	DNA	0.360769	0.360971	7.19169	0.416971	0.999668
Harbinger-6_DR	PIF-Harbinger	DNA	-0.213021	-0.214696	3.11786	0.777525	0.999668
Harbinger-6_LCh	DNA	DNA	-0.608728	-0.615578	3.18178	0.281451	0.999668
Harbinger-8_CGi	PIF-Harbinger	DNA	-0.420068	-0.421956	4.14629	0.417178	0.999668
Harbinger-8_DR	PIF-Harbinger	DNA	0.0790868	0.0791297	7.13488	0.84489	0.999668
Harbinger-N13B_DR	PIF-Harbinger	DNA	0.0207582	0.0207698	7.47589	0.945603	0.999668
Harbinger-N16_DR	PIF-Harbinger	DNA	-0.0109493	-0.0109591	7.09517	0.977595	0.999668
HarbingerN4_DR	PIF-Harbinger	DNA	-0.0361332	-0.0362094	5.47384	0.935182	0.999668
hAT-10_DR	hAT-Tip100	DNA	0.269956	0.270501	5.33205	0.583089	0.999668
hAT-10_XT	hAT-Ac	DNA	-1.22768	-1.23429	4.0616	0.0597476	0.999668
hAT-11_AMi	hAT-Ac	DNA	0.759941	0.766129	3.53171	0.358274	0.999668
hAT-11_CPB	hAT-Charlie	DNA	0.897593	0.9087	3.00304	0.186141	0.999668
hAT-11_LCh	DNA	DNA	0.202565	0.202784	6.22164	0.610391	0.999668
hAT-13_CPB	hAT-Tip100	DNA	-0.555685	-0.560479	3.46621	0.382487	0.999668
hAT-13_DR	hAT-Tip100	DNA	0.128234	0.128314	6.97092	0.701644	0.999668
hAT-14_DR	hAT-Ac	DNA	-0.0291264	-0.0293942	3.87385	0.960672	0.999668
hAT-14_HM	hAT-Ac	DNA	-0.271547	-0.271666	7.53915	0.314319	0.999668
hAT-15_Crp	hAT-Charlie	DNA	0.711907	0.717565	3.53489	0.248695	0.999668
hAT-15_DR	hAT-Ac	DNA	-0.866958	-0.868943	5.21545	0.084975	0.999668
hAT-16_DR	hAT-Ac	DNA	0.0684141	0.0685481	5.35765	0.861157	0.999668
hAT-17B_Croc	hAT-Ac	DNA	-0.110285	-0.110695	4.75134	0.833838	0.999668
hAT-17_DR	hAT-Ac	DNA	0.243984	0.244781	4.556	0.628149	0.999668
hAT-17_LCh	DNA	DNA	-0.451684	-0.453286	4.48641	0.420782	0.999668
hAT-1960_Ami	hAT-Charlie	DNA	-0.0273537	-0.0273641	7.93379	0.929162	0.999668
hAT-19_SM	hAT-Charlie	DNA	-0.507642	-0.510095	4.12053	0.459258	0.999668
hAT-1B_PM	hAT-Charlie	DNA	0.496158	0.496699	6.25221	0.153033	0.999668
hAT-1_DK	hAT-Ac	DNA	-0.386845	-0.389518	3.78653	0.514064	0.999668
HAT1_DR	hAT-Ac	DNA	0.0148979	0.0149072	7.18509	0.960478	0.999668
hAT1_Laf	hAT-Tip100	DNA	0.443604	0.443815	7.46298	0.18615	0.999668
hAT-1_LCh	DNA	DNA	0.536716	0.537274	6.33905	0.193975	0.999668
hAT-1_LMi	hAT-Tip100	DNA	-0.570153	-0.571271	5.35536	0.309737	0.999668
hAT-1_Mam	hAT-Tag1	DNA	0.188309	0.189779	3.2606	0.776403	0.999668
HAT1N_DR	hAT	DNA	0.126024	0.127381	3.11681	0.876066	0.999668
hAT-208_Ami	hAT-Blackjack	DNA	-0.15294	-0.153085	6.28185	0.682847	0.999668
hAT-20_DR	hAT-Ac	DNA	0.454922	0.456724	4.41002	0.372775	0.999668
hAT-21_CPB	hAT-Charlie	DNA	0.108112	0.108132	8.7545	0.681648	0.999668
hAT-21N2_LMi	hAT-Tip100	DNA	-0.0754398	-0.0758945	4.15053	0.885924	0.999668
hAT-22_DR	hAT-Charlie	DNA	-0.381349	-0.382611	4.64565	0.453859	0.999668
hAT-22_HM	hAT-Tip100	DNA	-0.383844	-0.384424	5.71481	0.367618	0.999668
hAT-23_DR	hAT-Tip100	DNA	0.528185	0.53052	4.28384	0.387266	0.999668
hAT-23_LCh	DNA	DNA	0.449209	0.452802	3.47521	0.50022	0.999668
hAT-24_LMi	hAT-Tip100	DNA	0.306459	0.308275	3.81963	0.561401	0.999668
hAT-24N1_DR	hAT-Ac	DNA	0.137526	0.137669	6.22358	0.765843	0.999668
hAT-25_DR	hAT-Charlie	DNA	0.428703	0.431901	3.58002	0.536774	0.999668
hAT-25_LCh	DNA	DNA	0.397211	0.399227	4.13483	0.623457	0.999668
hAT-25N1_DR	hAT-Charlie	DNA	-0.218852	-0.219491	4.66104	0.68121	0.999668
hAT-26_DR	hAT-Ac	DNA	-0.177146	-0.177205	7.94685	0.497289	0.999668
hAT-26_LCh	DNA	DNA	-0.114695	-0.115762	3.64288	0.899687	0.999668
hAT-27_HM	hAT-Ac	DNA	0.738451	0.742437	4.06468	0.165096	0.999668
hAT-27_LCh	DNA	DNA	-0.49604	-0.497054	5.43947	0.386545	0.999668
hAT-28_LCh	DNA	DNA	-0.219431	-0.220942	3.7542	0.726524	0.999668
hAT-29_DR	hAT-Ac	DNA	-0.0566845	-0.0567954	5.594	0.912301	0.999668
hAT-2_AC	hAT-Charlie	DNA	-0.00596122	-0.00599655	4.3203	0.989087	0.999668
hAT-2B_PM	hAT-Charlie	DNA	0.127079	0.127556	4.63622	0.817012	0.999668
hAT-2_DR	hAT-Charlie	DNA	0.122528	0.12254	9.65949	0.614486	0.999668
hAT-2_HM	hAT-Tag1	DNA	0.458745	0.458868	8.26181	0.12134	0.999668
hAT-2N1_AC	hAT-Charlie	DNA	0.00851472	0.00851358	4.4957	0.98814	0.999668
hAT-2n1_DR	hAT-Charlie	DNA	-0.00928881	-0.00928958	10.1756	0.968205	0.999668
hAT-2_SM	hAT-Charlie	DNA	-0.181424	-0.181781	5.37267	0.634428	0.999668
hAT-30_LCh	DNA	DNA	-0.166906	-0.167747	4.2541	0.729478	0.999668
hAT-30_SM	hAT-Tip100	DNA	0.682332	0.684804	4.62018	0.187682	0.999668
hAT-310_Ami	hAT-Charlie	DNA	-0.0192575	-0.0192692	7.26589	0.94701	0.999668
hAT-31_DR	hAT-Ac	DNA	-0.0585625	-0.0592085	3.24563	0.92745	0.999668
hAT-32_HM	hAT-Tag1	DNA	0.4607	0.467919	2.74583	0.558655	0.999668
hAT-32N1_DR	hAT-Charlie	DNA	0.190104	0.192135	3.17601	0.753976	0.999668
hAT-34_HM	hAT-Tip100	DNA	0.29391	0.296453	3.33794	0.68818	0.999668
HAT3_CI	hAT-Charlie	DNA	0.579212	0.581396	4.51927	0.217101	0.999668
hAT-3_DRh	hAT-hobo	DNA	0.0755825	0.0756273	7.18199	0.848351	0.999668
hAT-40_HM	hAT-Tip100	DNA	-0.1985	-0.19898	5.2352	0.642072	0.999668
hAT-41_SM	hAT-Charlie	DNA	-0.0057007	-0.00617666	3.0056	0.993259	0.999668
hAT-42_HM	hAT-Tip100	DNA	-0.136774	-0.136901	6.5339	0.726434	0.999668
hAT-42_Lch	DNA	DNA	-0.0367785	-0.0367955	7.58175	0.901854	0.999668
hAT-43_Lch	DNA	DNA	-0.0675008	-0.0676045	5.78611	0.860355	0.999668
hAT-44_Lch	DNA	DNA	-0.174607	-0.177175	3.02041	0.801436	0.999668
hAT-4_ACar	hAT-Ac	DNA	0.212267	0.212603	5.68153	0.599783	0.999668
hAT-4B_ACar	hAT-Ac	DNA	-0.0447361	-0.0449117	4.56829	0.923969	0.999668
hAT-4B_AMi	hAT-Ac	DNA	0.156372	0.156431	7.78038	0.571746	0.999668
hAT-4_BF	hAT-Tip100	DNA	-0.148298	-0.148786	4.65003	0.729313	0.999668
HAT4_CI	hAT-Ac	DNA	0.068588	0.0687404	5.50103	0.874756	0.999668
hAT-4_DK	hAT-hobo	DNA	-0.798213	-0.809472	2.83843	0.267379	0.999668
hAT-4_DR	hAT-Ac	DNA	0.103601	0.104012	4.45287	0.826825	0.999668
hAT-4_ML	hAT-Charlie	DNA	-0.367692	-0.369119	4.56551	0.516406	0.999668
hAT-4_PBa	DNA	DNA	0.0399693	0.0399705	11.4603	0.857212	0.999668
hAT-50_HM	hAT-Tip100	DNA	-0.387139	-0.387272	7.88745	0.227153	0.999668
hAT-51_HM	hAT-Tip100	DNA	0.486092	0.486759	5.91446	0.263239	0.999668
hAT-54_HM	hAT-Tip100	DNA	0.280883	0.281877	4.54737	0.664107	0.999668
hAT-57_HM	hAT-hATm	DNA	0.367051	0.369125	3.91148	0.5027	0.999668
hAT-5N1_DK	hAT-hobo	DNA	-0.273986	-0.274566	5.33966	0.602302	0.999668
hAT5-N1_GA	hAT-hAT5	DNA	-0.667948	-0.670724	4.32393	0.343291	0.999668
hAT6-2N1_SP	hAT-Blackjack	DNA	0.217407	0.218134	4.67619	0.65125	0.999668
hAT6-2_NV	hAT-Blackjack	DNA	-0.697429	-0.702745	3.5424	0.150137	0.999668
hAT6-2_SP	hAT-Blackjack	DNA	0.0467287	0.0467421	8.16754	0.865058	0.999668
hAT-6_BF	hAT-Tip100	DNA	-0.351762	-0.353596	3.92522	0.548334	0.999668
hAT-6B_PM	hAT-Charlie	DNA	0.397767	0.397987	7.20227	0.175337	0.999668
hAT-6_Crp	hAT-Charlie	DNA	0.409136	0.410644	4.54627	0.563152	0.999668
hAT-6_GA	hAT-Charlie	DNA	-0.050709	-0.0507235	8.12479	0.844016	0.999668
hAT-6_SM	hAT-Charlie	DNA	-0.665722	-0.667938	4.72388	0.145824	0.999668
hAT-6_XT	hAT-Charlie	DNA	0.491595	0.491736	8.16977	0.0664158	0.999668
hAT-7_AMi	hAT-Charlie	DNA	0.231042	0.23296	3.2591	0.726538	0.999668
hAT-7N2_PM	hAT-Charlie	DNA	-0.349581	-0.35271	3.39285	0.614824	0.999668
hAT-80_HM	hAT-Tip100	DNA	0.162379	0.162818	4.90083	0.769836	0.999668
hAT-8_CPB	hAT-Charlie	DNA	0.28763	0.290222	3.2498	0.709183	0.999668
hAT-8_PM	hAT-Charlie	DNA	-0.0671352	-0.0671865	6.50558	0.841879	0.999668
hAT-9_DR	hAT-Charlie	DNA	-0.045968	-0.0461488	4.47079	0.942958	0.999668
hAT-9_LMi	hAT-Charlie	DNA	-0.638831	-0.642664	3.79547	0.19373	0.999668
hATm-19_HM	hAT-hATm	DNA	-1.38731	-1.39492	4.02898	0.0405372	0.999668
hATm-31_HM	hAT-hATm	DNA	0.268865	0.270145	4.13477	0.634329	0.999668
hATm-39_HM	hAT-hATm	DNA	0.0429694	0.0430431	6.06209	0.920864	0.999668
hATm-3_AA	hAT-hATm	DNA	-0.556404	-0.558224	4.62577	0.291619	0.999668
hATm-52_HM	hAT-hATm	DNA	0.126066	0.126952	3.99729	0.83674	0.999668
hAT-N101_DR	hAT-Ac	DNA	-0.156182	-0.158543	2.98513	0.812539	0.999668
hAT-N103_DR	hAT-Charlie	DNA	0.0967734	0.0976689	3.24269	0.871474	0.999668
hAT-N106_DR	hAT	DNA	-0.326605	-0.326825	6.9002	0.306854	0.999668
hAT-N108_DR	hAT-Ac	DNA	0.236375	0.236762	5.62524	0.533058	0.999668
hAT-N10_ACar	hAT-Charlie	DNA	-0.218736	-0.220363	3.76669	0.725002	0.999668
hAT-N10_CPB	hAT-Ac	DNA	1.14452	1.15621	3.31399	0.0500275	0.999668
hAT-N112_DR	hAT-Ac	DNA	0.757449	0.764165	3.40068	0.196312	0.999668
hAT-N116_DR	hAT-Ac	DNA	-0.0700188	-0.0701952	5.27019	0.878136	0.999668
HATN11B_DR	hAT	DNA	0.138575	0.138617	8.01743	0.622761	0.999668
HATN11_DR	hAT	DNA	-0.181047	-0.181085	8.57379	0.565105	0.999668
hAT-N126_DR	hAT-Ac	DNA	-0.517099	-0.519015	4.41084	0.339671	0.999668
hAT-N127_DR	hAT-Charlie	DNA	-0.780105	-0.780488	7.41702	0.0886388	0.999668
HATN12_DR	hAT-Ac	DNA	-0.169759	-0.170132	5.27688	0.731894	0.999668
hAT-N12_LMi	hAT-Ac	DNA	0.471299	0.472109	5.6719	0.351534	0.999668
hAT-N131_DR	hAT-Ac	DNA	-0.0139683	-0.0139715	8.12642	0.95749	0.999668
hAT-N136_DR	hAT-Ac	DNA	-0.119382	-0.119748	4.93388	0.812476	0.999668
hAT-N137_DR	hAT-Tol2	DNA	0.288271	0.28866	5.88413	0.446616	0.999668
hAT-N138_DR	hAT-Tol2	DNA	0.239227	0.239598	5.79172	0.534609	0.999668
hAT-N13_AMi	hAT-Blackjack	DNA	-0.146411	-0.146557	6.4104	0.639973	0.999668
hAT-N141_DR	hAT-Charlie	DNA	0.186015	0.186502	4.90223	0.709371	0.999668
hAT-N144_DR	hAT	DNA	-0.125726	-0.125729	11.7446	0.633756	0.999668
hAT-N145_DR	hAT-Tol2	DNA	0.223253	0.223312	8.26244	0.383806	0.999668
hAT-N150_DR	hAT	DNA	0.475958	0.480838	3.13752	0.4607	0.999668
HATN15_DR	hAT	DNA	0.317973	0.318542	5.51656	0.541907	0.999668
hAT-N16_Crp	hAT-Charlie	DNA	0.264521	0.265079	5.27544	0.624456	0.999668
HATN16_DR	hAT-Charlie	DNA	0.171024	0.171126	7.07263	0.707295	0.999668
HATN17_DR	hAT	DNA	-0.343933	-0.344193	6.79412	0.318971	0.999668
hAT-N1_CSa	hAT-Charlie	DNA	0.197817	0.197922	7.27069	0.502686	0.999668
hAT-N1_FR	hAT-Charlie	DNA	0.451174	0.452543	4.88176	0.306104	0.999668
hAT-N21B_CPB	hAT-Charlie	DNA	-0.188613	-0.18878	6.51082	0.540632	0.999668
hAT-N21B_DR	hAT-Ac	DNA	0.172278	0.173393	3.65155	0.750799	0.999668
hAT-N21_DR	hAT-Charlie	DNA	-0.20511	-0.205394	5.97335	0.692564	0.999668
hAT-N23_DR	hAT-Ac	DNA	0.89106	0.897392	3.71644	0.176359	0.999668
hAT-N24_Crp	hAT-Charlie	DNA	-0.55511	-0.55643	5.20661	0.190602	0.999668
hAT-N25B_DR	hAT-Ac	DNA	0.825249	0.832959	3.40114	0.232382	0.999668
hAT-N26_DR	hAT	DNA	-0.299506	-0.300057	5.43792	0.461553	0.999668
hATN-28_DRe	hAT-Charlie	DNA	-0.335135	-0.336145	4.70224	0.504645	0.999668
hAT-N29_DR	hAT	DNA	-0.194984	-0.196804	3.50136	0.6847	0.999668
hAT-N2A_XT	hAT-Ac	DNA	-0.620777	-0.621376	6.46919	0.108314	0.999668
hAT-N31_DR	hAT	DNA	0.584706	0.587969	4.04405	0.246277	0.999668
hAT-N35B_DR	hAT-Ac	DNA	-0.00206327	-0.00208136	5.36492	0.995485	0.999668
hAT-N35C_DR	hAT-Ac	DNA	-0.453733	-0.453883	7.94501	0.26441	0.999668
hAT-N36B_DR	hAT	DNA	0.57362	0.578851	3.29773	0.38785	0.999668
hAT-N36C_DR	hAT	DNA	0.887998	0.894757	3.62019	0.102503	0.999668
hAT-N36_DR	hAT	DNA	-0.222214	-0.223998	3.66415	0.687527	0.999668
hAT-N44_DR	hAT-Tip100	DNA	-0.4743	-0.475907	4.72355	0.476296	0.999668
hAT-N45B_DR	hAT	DNA	0.110171	0.110178	10.2486	0.654009	0.999668
hAT-N45_DR	hAT	DNA	-0.0716349	-0.0731419	2.8844	0.915941	0.999668
hAT-N47B_DR	hAT	DNA	-0.294688	-0.295103	5.86237	0.460813	0.999668
hAT-N49_DR	hAT-Ac	DNA	-0.162384	-0.163071	4.48818	0.767417	0.999668
hATN-4_ACar	hAT-Charlie	DNA	0.456786	0.456922	8.13311	0.0972684	0.999668
hAT-N50B_DR	hAT-Ac	DNA	0.148401	0.148436	8.38593	0.564594	0.999668
hAT-N50_DR	hAT-Ac	DNA	0.330929	0.333854	3.28917	0.61447	0.999668
hAT-N52B_DR	hAT-Ac	DNA	0.279708	0.280496	5.00808	0.597913	0.999668
hAT-N53B_DR	hAT-Ac	DNA	0.139803	0.140588	3.6496	0.804489	0.999668
hAT-N53_DR	hAT-Ac	DNA	-0.023497	-0.0235002	9.08686	0.924398	0.999668
hAT-N59B_DR	hAT-Tip100	DNA	0.81636	0.823983	3.34208	0.141314	0.999668
hAT-N59_DR	hAT-Tip100	DNA	0.978383	0.988534	3.22818	0.0689515	0.999668
hAT-N5_ACar	hAT-Tip100	DNA	0.323307	0.32393	5.41969	0.493781	0.999668
hAT-N60_DR	hAT-Ac	DNA	0.168252	0.169358	3.50265	0.743227	0.999668
hAT-N67_DR	hAT	DNA	-0.440074	-0.441827	4.34777	0.505696	0.999668
hAT-N6_ACar	hAT-Charlie	DNA	0.0493764	0.0494279	6.0704	0.906523	0.999668
hAT-N71_DR	Zisupton	DNA	0.133778	0.133803	8.7269	0.574365	0.999668
hAT-N74_DR	hAT-Ac	DNA	-0.239469	-0.239575	7.51203	0.476907	0.999668
HATN7_DR	hAT	DNA	0.993151	1.00715	2.92577	0.147455	0.999668
hAT-N81_DR	hAT-Charlie	DNA	-0.0911095	-0.0911509	7.44451	0.737397	0.999668
hAT-N82_DR	hAT-Ac	DNA	-0.00571343	-0.00564876	4.54689	0.990254	0.999668
hAT-N83_DR	hAT-Charlie	DNA	-0.547455	-0.550624	3.90304	0.401726	0.999668
hAT-N91_DR	hAT-Ac	DNA	0.385136	0.385856	5.43535	0.373818	0.999668
hAT-N93_DR	hAT-Ac	DNA	-0.127669	-0.127782	6.43113	0.694539	0.999668
hAT-N95_DR	hAT	DNA	0.737777	0.745697	3.13529	0.262081	0.999668
hAT-N99_DR	hAT	DNA	0.374021	0.374862	5.18234	0.389771	0.999668
hATw-1_HM	hAT-hATw	DNA	-0.073333	-0.0735744	4.4725	0.910674	0.999668
hATx-1_SM	hAT-hATx	DNA	-0.0763808	-0.07648	5.84456	0.832944	0.999668
HE1_DR1	tRNA-V	SINE	0.263702	0.264185	5.47427	0.590037	0.999668
HE1_HJ	tRNA-V-CR1	SINE	0.146505	0.146872	4.93014	0.76766	0.999668
HE1_MM	tRNA-V-CR1	SINE	-0.391354	-0.392388	5.01215	0.365319	0.999668
HE1_SINE	tRNA-V-CR1	SINE	-0.130228	-0.130299	7.16377	0.673085	0.999668
HEL	Helitron	RC	0.758981	0.76485	3.53452	0.159825	0.999668
Helitron-1_AC	Helitron	RC	-0.12781	-0.128019	5.67611	0.735445	0.999668
Helitron1_CE	Helitron	RC	-0.0465735	-0.0466421	5.07564	0.916704	0.999668
Helitron-1_CGi	Helitron	RC	0.561297	0.56314	4.7236	0.2015	0.999668
Helitron-1_DBp	Helitron	RC	0.107106	0.107189	6.79567	0.781543	0.999668
Helitron-1_DEu	Helitron	RC	-0.262357	-0.265263	3.28817	0.688704	0.999668
Helitron-1_DR	Helitron	RC	0.225301	0.225456	6.90578	0.504238	0.999668
Helitron-1_HM	Helitron	RC	0.201088	0.201096	11.0722	0.504924	0.999668
Helitron-1_NV	Helitron	RC	0.0253055	0.025332	3.67442	0.962879	0.999668
Helitron2_CE	Helitron	RC	0.405592	0.406359	5.45915	0.440914	0.999668
Helitron-2_DVir	Helitron	RC	-0.408341	-0.408732	6.41042	0.281509	0.999668
Helitron-2_HM	Helitron	RC	-0.140136	-0.140347	5.86182	0.78505	0.999668
Helitron-3_DR	Helitron	RC	0.0170675	0.0171106	5.71597	0.962487	0.999668
Helitron-3N3_PM	Helitron	RC	-0.138474	-0.138573	6.83673	0.651315	0.999668
Helitron-3_PM	Helitron	RC	1.24062	1.24683	4.26301	0.0477776	0.999668
Helitron-4_DR	Helitron	RC	-0.267829	-0.26791	8.04491	0.378406	0.999668
Helitron-6_CGi	Helitron	RC	0.0641144	0.0641468	7.37131	0.836162	0.999668
Helitron-7_CGi	Helitron	RC	0.689392	0.691785	4.6727	0.257473	0.999668
Helitron-7_DRh	Helitron	RC	-0.318809	-0.322892	2.9477	0.640655	0.999668
Helitron-7_NVi	Helitron	RC	0.105642	0.106871	3.27514	0.854387	0.999668
Helitron-9_CGi	Helitron	RC	0.352656	0.35274	8.43598	0.475103	0.999668
Helitron-N18_CGi	Helitron	RC	-0.559122	-0.560606	4.88903	0.357691	0.999668
HelitronN-1_DPe	Helitron	RC	-0.173591	-0.173684	7.24045	0.683307	0.999668
Helitron-N1_HSal	DNA	DNA	0.345063	0.346429	4.3642	0.516121	0.999668
Helitron-N1_PBa	DNA	DNA	0.322754	0.322862	7.93079	0.267788	0.999668
Helitron-N26_CGi	Helitron	RC	-0.00698701	-0.00698788	8.65777	0.981527	0.999668
Helitron-N2_DR	Helitron	RC	0.107874	0.10791	7.96978	0.724921	0.999668
Helitron-N2_Gav	Helitron	RC	-0.151815	-0.153056	3.38865	0.785776	0.999668
Helitron-N32_CGi	Helitron	RC	0.577247	0.579037	4.79778	0.26253	0.999668
Helitron-N34_CGi	Helitron	RC	-0.225456	-0.226231	4.7087	0.721979	0.999668
Helitron-N35_CGi	Helitron	RC	-0.420261	-0.420587	6.72232	0.223865	0.999668
Helitron-N3_DR	Helitron	RC	-0.924006	-0.928113	4.22745	0.13018	0.999668
Helitron-N3_DT	Helitron	RC	0.0843584	0.084368	9.44469	0.776968	0.999668
Helitron-N46_CGi	Helitron	RC	-0.420661	-0.420875	7.32908	0.194329	0.999668
HER_LINE	CR1	LINE	0.560832	0.561661	5.82399	0.221578	0.999668
HERO-1_BF	R2-Hero	LINE	-0.131312	-0.131825	4.33492	0.828835	0.999668
HERO-2_BF	R2-Hero	LINE	0.848576	0.852369	4.33422	0.136751	0.999668
HERO-2_DR	R2-Hero	LINE	0.452432	0.453681	4.93658	0.373497	0.999668
HERODr	R2-Hero	LINE	0.9784	0.986297	3.60306	0.0663382	0.999668
HEROFr	R2-Hero	LINE	0.552142	0.552929	5.88833	0.279494	0.999668
HEROTn	R2-Hero	LINE	-0.1316	-0.132058	4.81096	0.810767	0.999668
HERV16-int	ERVL	LTR	-0.0683669	-0.0691107	3.28361	0.914884	0.999668
HERVE-int	ERV1	LTR	-0.387703	-0.388798	4.96696	0.491042	0.999668
HERVIP10B3-int	ERV1	LTR	0.551891	0.552917	5.50813	0.287072	0.999668
HERVK14-int	ERVK	LTR	0.835639	0.843279	3.38154	0.161347	0.999668
HERVK22-int	ERVK	LTR	0.391763	0.392854	4.90908	0.467859	0.999668
HERVL66-int	ERVL	LTR	0.446916	0.447662	5.65802	0.462434	0.999668
HERVL-int	ERVL	LTR	0.287611	0.287941	6.15729	0.409098	0.999668
HERVS71-int	ERV1	LTR	-0.753822	-0.755911	4.89298	0.165883	0.999668
HeT-A3_DVi	Jockey	LINE	0.355672	0.358114	3.57262	0.549583	0.999668
HET-A_DV	Jockey	LINE	0.620515	0.622661	4.65058	0.261184	0.999668
HMSBEAGLE_I-int	Gypsy	LTR	-0.0458651	-0.0459657	5.49041	0.947442	0.999668
HOMER	hAT-hobo	DNA	0.769211	0.772716	4.29206	0.168373	0.999668
Homo6	hAT-Pegasus	DNA	0.068203	0.0682287	7.79563	0.805814	0.999668
HPAI	tRNA-L2	SINE	0.396801	0.397188	6.404	0.362286	0.999668
I-1_DP	I	LINE	-0.822996	-0.82934	3.51241	0.159405	0.999668
I-1_DR	I	LINE	0.00184897	0.00181886	4.46698	0.996654	0.999668
I-3_AC	I	LINE	0.0431271	0.0431846	5.09042	0.917261	0.999668
I-3_CQ	I	LINE	-0.101828	-0.102509	4.00799	0.849364	0.999668
I-3_DBi	I	LINE	-0.371625	-0.371896	6.77393	0.413306	0.999668
I-3_DR	I	LINE	0.280078	0.283363	3.16437	0.6188	0.999668
I-69_AAe	I	LINE	0.0150153	0.0150281	5.31626	0.976881	0.999668
I-7B_AAe	I	LINE	-0.167384	-0.167768	5.26873	0.755335	0.999668
I-7_DBp	I	LINE	0.619631	0.620272	6.36577	0.103394	0.999668
I_Ele22	I	LINE	-0.135552	-0.137305	3.23899	0.824512	0.999668
I_Ele8	I	LINE	-0.334857	-0.334894	9.52601	0.37756	0.999668
IMPB_01	Satellite	Satellite	-0.200704	-0.200733	9.11017	0.37765	0.999668
IMPB_02	Satellite	Satellite	-0.789117	-0.790637	5.41055	0.143061	0.999668
INV2j_DB	Unknown	Unknown	0.403981	0.405012	5.04311	0.33515	0.999668
Invader6_I-int	Gypsy	LTR	0.434036	0.434236	7.47767	0.214591	0.999668
IS3EU-1_DR	IS3EU	DNA	0.306863	0.306978	7.74815	0.289688	0.999668
IS3EU-1N1_DR	IS3EU	DNA	0.372393	0.372502	8.12662	0.395436	0.999668
IS3EU-2_CGi	IS3EU	DNA	-0.387467	-0.387957	5.96556	0.40245	0.999668
IS3EU-2_DR	IS3EU	DNA	0.0849681	0.0851322	5.44886	0.85041	0.999668
IS3EU-4_DR	IS3EU	DNA	-0.0906448	-0.0906735	7.97422	0.745152	0.999668
IS3EU-5_DR	IS3EU	DNA	0.233876	0.234361	5.33738	0.576601	0.999668
IS3EU-N1_CGi	IS3EU	DNA	0.242964	0.243741	4.69596	0.649588	0.999668
IS4EU-1_BF	PIF-ISL2EU	DNA	-0.521192	-0.525383	3.34071	0.393253	0.999668
IS4EU-2_DR	PIF-ISL2EU	DNA	0.014756	0.0147703	4.00012	0.979607	0.999668
ISFUN1	Helitron	RC	-0.417485	-0.417644	7.7434	0.235744	0.999668
ISL2EU-11_CGi	PIF-ISL2EU	DNA	-0.240428	-0.240816	5.71684	0.503351	0.999668
ISL2EU-15_CGi	PIF-ISL2EU	DNA	0.480771	0.484073	3.67151	0.348507	0.999668
ISL2EU-18_CGi	PIF-ISL2EU	DNA	-0.584712	-0.585012	7.32113	0.135359	0.999668
ISL2EU-1_ADi	PIF-ISL2EU	DNA	-0.146536	-0.147986	3.43596	0.838924	0.999668
ISL2EU-1_CS	PIF-ISL2EU	DNA	0.0532023	0.0534355	4.37701	0.902523	0.999668
ISL2EU-1_DR	PIF-ISL2EU	DNA	0.265206	0.265943	4.9116	0.629205	0.999668
ISL2EU-1_LHu	DNA	DNA	-0.205977	-0.206078	7.3507	0.514227	0.999668
ISL2EU-1_SK	PIF-ISL2EU	DNA	-0.28455	-0.284726	7.01376	0.45747	0.999668
ISL2EU-3_CFl	DNA	DNA	-0.308866	-0.309057	7.01197	0.439364	0.999668
ISL2EU-3N1_CFl	DNA	DNA	0.0602851	0.0603026	8.18153	0.821814	0.999668
ISL2EU-7_CFl	DNA	DNA	0.476546	0.479937	3.64388	0.477525	0.999668
ISL2EU-7_CGi	PIF-ISL2EU	DNA	-0.361474	-0.363101	4.33834	0.513598	0.999668
ISL2EU-8_CGi	PIF-ISL2EU	DNA	-0.123486	-0.123595	6.38382	0.760445	0.999668
JAM1C_AAe	RTE-BovB	LINE	0.323172	0.324305	4.59453	0.595862	0.999668
Jockey-11_DF	Jockey	LINE	-0.441603	-0.442623	5.14822	0.288145	0.999668
Jockey-12_DAn	Jockey	LINE	-0.168366	-0.170275	3.13937	0.789431	0.999668
Jockey-13_AAe	Jockey	LINE	-0.172729	-0.172979	5.91473	0.657074	0.999668
Jockey-13_DBp	Jockey	LINE	-0.288145	-0.290067	3.69975	0.540677	0.999668
Jockey-14_DBp	Jockey	LINE	1.55598	1.56157	4.88461	0.0752944	0.999668
Jockey-15_DBp	Jockey	LINE	0.156342	0.157265	3.5607	0.786304	0.999668
Jockey-1_DBp	Jockey	LINE	-0.689862	-0.69102	5.6288	0.11014	0.999668
Jockey-2_DGri	Jockey	LINE	-0.165294	-0.165488	6.08412	0.626397	0.999668
Jockey-3_DAn	Jockey	LINE	0.042343	0.0424184	5.59971	0.903405	0.999668
Jockey-3_DGri	Jockey	LINE	-0.0866316	-0.0866487	8.70655	0.757322	0.999668
Jockey-3_DPer	Jockey	LINE	0.0238265	0.0238487	6.00417	0.963713	0.999668
Jockey-4B_DVi	Jockey	LINE	-0.369459	-0.370183	5.40054	0.324141	0.999668
Jockey-6_DK	Jockey	LINE	0.122972	0.123001	8.44783	0.655803	0.999668
Jockey-7_DAn	Jockey	LINE	-0.305607	-0.306403	4.92044	0.615009	0.999668
Jockey-7_DYa	Jockey	LINE	-0.265959	-0.266272	6.16042	0.417429	0.999668
Jockey-9_DAn	Jockey	LINE	-0.509668	-0.516223	2.98318	0.505619	0.999668
Jockey-9_DF	Jockey	LINE	0.664999	0.670495	3.51559	0.346857	0.999668
Jockey-9_DPer	Jockey	LINE	-0.215077	-0.216525	3.80396	0.722104	0.999668
Jockey_Ele3	Jockey	LINE	0.400925	0.404358	3.3452	0.502585	0.999668
KibiFr1	L1	LINE	0.162662	0.16274	7.36578	0.611008	0.999668
Kiri-10_AAe	L2	LINE	-0.13027	-0.130348	7.16687	0.731849	0.999668
Kiri-1_CQ	L2	LINE	-0.0554237	-0.055935	2.90034	0.949796	0.999668
Kiri-1_DBi	L2	LINE	-0.283238	-0.285561	3.63475	0.655469	0.999668
Kiri-2_AAe	L2	LINE	0.338916	0.341924	3.27463	0.537896	0.999668
Kiri-35_AAe	L2	LINE	0.00808651	0.00805785	4.72671	0.988577	0.999668
Kiri-3_AAe	L2	LINE	-0.180753	-0.182189	3.71266	0.724464	0.999668
Kiri-3_CQ	L2	LINE	-0.117255	-0.117331	6.92044	0.747049	0.999668
Kolobok-12_CGi	DNA	DNA	0.0036918	0.00370146	6.45095	0.992393	0.999668
Kolobok-12_HM	Kolobok-Hydra	DNA	-0.192037	-0.193211	4.02851	0.739118	0.999668
Kolobok-14_HM	Kolobok-Hydra	DNA	0.737698	0.745574	3.20771	0.196807	0.999668
Kolobok-18_HM	Kolobok-Hydra	DNA	0.124114	0.12437	5.42786	0.73734	0.999668
Kolobok-1_AP	DNA	DNA	0.321259	0.322785	4.15796	0.527508	0.999668
Kolobok-1_DR	Kolobok-T2	DNA	0.540363	0.543432	3.96081	0.397645	0.999668
Kolobok-1_Ppac	Kolobok-T2	DNA	-0.0283356	-0.028477	4.84298	0.960653	0.999668
Kolobok-2_AA	Kolobok-Hydra	DNA	-0.020416	-0.0204232	7.29912	0.951217	0.999668
Kolobok-2_AP	DNA	DNA	-0.239439	-0.239642	6.61957	0.452161	0.999668
Kolobok-2_Aplcal	Kolobok-Hydra	DNA	0.0854521	0.0856401	5.22773	0.858349	0.999668
Kolobok-2_CGi	Kolobok-T2	DNA	0.156144	0.156436	5.62994	0.695102	0.999668
Kolobok-2_DR	Kolobok-T2	DNA	0.335816	0.336829	4.78886	0.585076	0.999668
Kolobok-2_XT	Kolobok-T2	DNA	0.175272	0.175283	10.353	0.462152	0.999668
Kolobok-3_Aplcal	Kolobok-Hydra	DNA	0.0563054	0.0563107	9.69733	0.80534	0.999668
Kolobok-3_DR	Kolobok-T2	DNA	-0.09142	-0.0914928	6.73139	0.771714	0.999668
Kolobok-4_CGi	Kolobok-Hydra	DNA	0.295514	0.300657	2.56953	0.739657	0.999668
Kolobok-4_DR	Kolobok-T2	DNA	0.329811	0.330462	5.37473	0.531321	0.999668
Kolobok-7_CGi	Kolobok-Hydra	DNA	-0.0927246	-0.0928931	5.51813	0.804768	0.999668
Kolobok-N1_AEc	DNA	DNA	0.0440379	0.0440402	10.564	0.847906	0.999668
Kolobok-N4_DR	Kolobok-T2	DNA	0.119495	0.119579	6.9334	0.734353	0.999668
Kolobok-N4_XT	Kolobok-T2	DNA	0.165539	0.165743	6.06798	0.685677	0.999668
Kolobok-N7_CGi	Kolobok	DNA	-0.35745	-0.361656	3.13677	0.501859	0.999668
Kolobok-N9_DR	Kolobok-T2	DNA	0.572614	0.573381	5.97914	0.243988	0.999668
Kopi1_I-int	Copia	LTR	0.250971	0.25367	2.93593	0.719131	0.999668
Kopi2_I-int	Copia	LTR	0.396374	0.396909	5.94051	0.452741	0.999668
L1-102_DR	L1	LINE	0.383864	0.384079	7.20602	0.163533	0.999668
L1-105_DR	L1	LINE	0.545599	0.546768	5.35249	0.306178	0.999668
L1-107_DR	L1	LINE	0.770448	0.778701	3.22306	0.270276	0.999668
L1-108_DR	L1	LINE	-0.200439	-0.200521	7.62347	0.468489	0.999668
L1-10_DR	L1	LINE	-0.813428	-0.816727	4.38884	0.149132	0.999668
L1-10_LCh	LINE	LINE	-0.389104	-0.390024	5.03059	0.433521	0.999668
L1-111_DR	L1	LINE	0.0561817	0.0565105	4.50661	0.911717	0.999668
L1-11_DR	L1	LINE	0.0162151	0.0162171	9.52595	0.94912	0.999668
L1-12_DR	L1	LINE	-0.148822	-0.14891	7.01151	0.658212	0.999668
L1-13_DR	L1	LINE	-0.277291	-0.279916	3.45103	0.637805	0.999668
L1-13_LCh	LINE	LINE	0.830673	0.838011	3.54471	0.29808	0.999668
L1-14_DR	L1	LINE	0.0414684	0.0415049	6.59339	0.918231	0.999668
L1-16_DR	L1	LINE	-0.607735	-0.608983	5.32938	0.172338	0.999668
L1-17a_Lch	LINE	LINE	-0.0409595	-0.0414452	3.6793	0.93855	0.999668
L1-17b_Lch	LINE	LINE	-0.502141	-0.506149	3.59501	0.441226	0.999668
L1-19_DR	L1	LINE	0.552528	0.556102	3.76879	0.362977	0.999668
L1-1_AFC	L1	LINE	0.0662409	0.0662421	12.1457	0.75162	0.999668
L1-1_AMe	L1	LINE	0.247717	0.247867	7.11354	0.39711	0.999668
L1-1_CPB	L1	LINE	-0.274748	-0.275113	5.85385	0.566397	0.999668
L1-1_DN	L1	LINE	0.335692	0.336282	5.57008	0.385479	0.999668
L1-1_DR	L1	LINE	0.283912	0.284196	6.34302	0.5463	0.999668
L1-1_ME	L1	LINE	-0.00531724	-0.0056261	3.35453	0.992255	0.999668
L1-1_Pca	L1	LINE	0.516026	0.520704	3.33433	0.349443	0.999668
L1-1_Vpa	L1	LINE	0.846539	0.850883	4.16084	0.140777	0.999668
L1-20_DR	L1	LINE	0.288384	0.289585	4.35628	0.598892	0.999668
L1-21_DR	L1	LINE	-0.216339	-0.216967	4.90107	0.62451	0.999668
L1-21_Lch	LINE	LINE	-0.132294	-0.133375	3.68095	0.832551	0.999668
L1-22_DR	L1	LINE	-0.596197	-0.597812	4.92771	0.236056	0.999668
L1-23_DR	L1	LINE	-0.0923572	-0.0939429	3.16444	0.867513	0.999668
L1-24C_ACar	L1	LINE	1.61905	1.63132	3.874	0.145258	0.999668
L1-24_DR	L1	LINE	-0.17593	-0.176001	7.70043	0.588702	0.999668
L1-25_DR	L1	LINE	-0.00281536	-0.00282774	5.5942	0.995116	0.999668
L1-26_DR	L1	LINE	0.117387	0.117505	6.38067	0.742297	0.999668
L1-27_DR	L1	LINE	-0.356599	-0.357316	5.41067	0.437678	0.999668
L1-2B1_Cho	L1	LINE	0.105754	0.105796	7.66285	0.746162	0.999668
L1-2B_Cpo	L1	LINE	-0.121407	-0.121552	6.02234	0.805356	0.999668
L1-2_CPB	L1	LINE	-0.260685	-0.261785	4.46027	0.615265	0.999668
L1-2_DR	L1-Tx1	LINE	1.07009	1.07441	4.55018	0.103175	0.999668
L1-2_Ttr	L1	LINE	0.735377	0.741562	3.49831	0.119985	0.999668
L1-31_DR	L1	LINE	0.274771	0.2753	5.41893	0.463984	0.999668
L1-32_DR	L1	LINE	-0.0725983	-0.0726264	7.6106	0.810091	0.999668
L1-32_XT	L1	LINE	-0.221792	-0.222358	4.98488	0.622239	0.999668
L1-33_AAe	L1	LINE	0.027704	0.0279195	4.4338	0.965929	0.999668
L1-33_ACar	L1	LINE	0.115007	0.115405	4.54948	0.829127	0.999668
L1-33_DR	L1	LINE	-0.386595	-0.388629	4.06053	0.45792	0.999668
L1-34_DR	L1	LINE	0.119259	0.119358	6.57989	0.774002	0.999668
L1-35_DR	L1	LINE	0.373964	0.375183	4.68953	0.523749	0.999668
L1-36_ACar	L1	LINE	0.502644	0.50366	5.40742	0.349322	0.999668
L1-36_DR	L1	LINE	-0.0245752	-0.0245887	5.73161	0.950224	0.999668
L1-37_DR	L1	LINE	-1.50442	-1.51126	4.49518	0.0395182	0.999668
L1-39_DR	L1	LINE	-0.445158	-0.451163	3.0202	0.540678	0.999668
L1-3_CPB	L1	LINE	1.48911	1.49887	4.02116	0.184439	0.999668
L1-40_DR	L1	LINE	-0.52861	-0.528771	8.07399	0.132226	0.999668
L1-42_DR	L1	LINE	-0.034412	-0.0344827	4.96871	0.937702	0.999668
L1-43_ACar	L1	LINE	-0.311006	-0.311941	4.89795	0.588226	0.999668
L1-43_DR	L1	LINE	0.534624	0.535061	6.67818	0.0753789	0.999668
L1-44_DR	L1	LINE	0.156945	0.15729	5.19154	0.730396	0.999668
L1-44_XT	L1	LINE	-1.61589	-1.62914	3.51027	0.0648765	0.999668
L1-45_AAe	L1	LINE	-0.0652255	-0.0653309	5.80576	0.878414	0.999668
L1-45_DR	L1	LINE	-0.405084	-0.405616	5.94569	0.362243	0.999668
L1-46_DR	L1	LINE	1.01931	1.02841	3.45153	0.11764	0.999668
L1-47B_ACar	L1	LINE	0.203779	0.203936	6.7529	0.544513	0.999668
L1-47_DR	L1	LINE	0.0140276	0.0140327	7.78079	0.961429	0.999668
L1-48_DR	L1	LINE	-0.146356	-0.146408	7.80736	0.624144	0.999668
L1-49_DR	L1	LINE	0.739829	0.743439	4.18826	0.185733	0.999668
L1-4B_DR	L1	LINE	1.05979	1.07516	2.91642	0.141105	0.999668
L1-4_CPB	L1	LINE	-0.50459	-0.511473	2.87629	0.451853	0.999668
L1-50_DR	L1	LINE	0.169616	0.169698	7.40137	0.543791	0.999668
L1-51_DR	L1	LINE	0.134253	0.134287	8.28511	0.677693	0.999668
L1-52_DR	L1	LINE	-0.107111	-0.107674	4.31968	0.851974	0.999668
L1-52_XT	L1	LINE	-0.442379	-0.445509	3.5243	0.54786	0.999668
L1-53_DR	L1	LINE	0.185308	0.185339	8.93193	0.503104	0.999668
L1-54_ACar	L1	LINE	0.254822	0.25508	6.36744	0.624622	0.999668
L1-54_DR	L1	LINE	0.436941	0.440079	3.72295	0.464625	0.999668
L1-55_DR	L1	LINE	-0.71146	-0.719746	3.15091	0.278531	0.999668
L1-56_DR	L1	LINE	-0.0291657	-0.0291755	7.98536	0.922717	0.999668
L1-56_XT	L1	LINE	1.29903	1.31523	3.12479	0.119215	0.999668
L1-59_DR	L1	LINE	-0.318019	-0.319279	4.56621	0.582751	0.999668
L1-5_CQ	L1-Tx1	LINE	-0.380737	-0.386294	2.97096	0.554211	0.999668
L1-5_LCh	LINE	LINE	-1.24377	-1.25389	3.48705	0.082755	0.999668
L1-60_ACar	L1	LINE	0.717259	0.71832	5.88131	0.0882204	0.999668
L1-60_DR	L1	LINE	0.919269	0.924598	3.985	0.135484	0.999668
L1-61_ACar	L1	LINE	-0.0942883	-0.0943477	7.08322	0.866291	0.999668
L1-63_DR	L1	LINE	-0.652191	-0.653706	5.19872	0.0807449	0.999668
L1-65_DR	L1	LINE	0.11938	0.119702	4.88116	0.806592	0.999668
L1-66_DR	L1	LINE	-0.243512	-0.243617	7.52379	0.532583	0.999668
L1-67_DR	L1	LINE	-0.0683826	-0.0684537	6.329	0.83813	0.999668
L1-68_DR	L1	LINE	0.307026	0.307295	6.57283	0.425253	0.999668
L1-69_DR	L1	LINE	-0.579417	-0.585451	3.03045	0.425342	0.999668
L1-70_DR	L1-Tx1	LINE	0.356734	0.359421	3.55352	0.654905	0.999668
L1-71_DR	L1	LINE	-0.434633	-0.436406	4.32233	0.379095	0.999668
L1-72_DR	L1	LINE	0.0773659	0.0776026	4.48752	0.881377	0.999668
L1-74_DR	L1-Tx1	LINE	-0.0351728	-0.0352239	6.26802	0.918929	0.999668
L1-75_DR	L1	LINE	0.5119	0.512361	6.53745	0.0936174	0.999668
L1-78_DR	L1	LINE	-0.97692	-0.977619	6.88115	0.231842	0.999668
L1-79_DR	L1	LINE	-0.957095	-0.961814	4.23422	0.157191	0.999668
L1-7_LCh	LINE	LINE	0.299526	0.301592	3.53019	0.607692	0.999668
L1-81_ACar	L1	LINE	-0.225462	-0.226124	4.76891	0.588004	0.999668
L1-82_ACar	L1	LINE	0.175384	0.175933	4.66774	0.751725	0.999668
L1-82_DR	L1	LINE	-0.0920757	-0.0927747	3.75234	0.87985	0.999668
L1-83_DR	L1	LINE	0.270511	0.271103	5.21335	0.657706	0.999668
L1-85_DR	L1-Tx1	LINE	0.27182	0.272349	5.38703	0.599212	0.999668
L1-87_DR	L1	LINE	0.616247	0.617195	5.78696	0.202695	0.999668
L1-88_DR	L1	LINE	0.268656	0.269328	5.06474	0.658939	0.999668
L1-89_DR	L1	LINE	0.247637	0.248114	5.37965	0.503438	0.999668
L1-8_DR	L1	LINE	-0.0966925	-0.0967421	7.27131	0.73228	0.999668
L1-90_DR	L1	LINE	-0.216715	-0.21943	3.10503	0.740758	0.999668
L1-91_DR	L1	LINE	0.35417	0.354836	5.44937	0.482312	0.999668
L1-92_DR	L1	LINE	0.132954	0.133262	5.14611	0.7443	0.999668
L1-94_DR	L1	LINE	0.273215	0.273368	7.19274	0.390211	0.999668
L1-95_DR	L1	LINE	-0.237888	-0.238213	5.91747	0.473126	0.999668
L1-98_DR	L1	LINE	-0.365662	-0.367305	4.12424	0.527936	0.999668
L1-99_DR	L1	LINE	0.313454	0.314605	4.49433	0.545546	0.999668
L1A-2_MD	L1	LINE	0.636841	0.640213	4.05904	0.286235	0.999668
L1_AC_7	L1	LINE	-0.0552911	-0.0554212	4.86112	0.894114	0.999668
L1A_Oc	L1	LINE	-0.104321	-0.104845	4.36789	0.871843	0.999668
L1B_SS	L1	LINE	0.05594	0.0560869	4.44069	0.921649	0.999668
L1_Cf	L1	LINE	-0.0900459	-0.0902851	5.1282	0.860578	0.999668
L1_Ele5	L1	LINE	-0.894682	-0.904907	3.13818	0.130527	0.999668
L1M2	L1	LINE	0.233075	0.234847	3.50016	0.769983	0.999668
L1M3e	L1	LINE	-0.0806437	-0.0814286	3.44648	0.904788	0.999668
L1_Mars1b	L1	LINE	-0.106909	-0.107077	5.46273	0.838961	0.999668
L1MdGf_I	L1	LINE	-0.653763	-0.65802	3.6569	0.36724	0.999668
L1MdMus_II	L1	LINE	0.148709	0.148986	5.57548	0.751352	0.999668
L1_Mur1	L1	LINE	0.200311	0.200674	5.4733	0.713475	0.999668
L1_Opos3	L1	LINE	-0.597095	-0.604057	2.96033	0.29208	0.999668
L1PA14	L1	LINE	-0.0788552	-0.0796868	3.27714	0.915426	0.999668
L2-10_LCh	LINE	LINE	0.14262	0.143343	3.87724	0.78277	0.999668
L2-11_DRe	L2	LINE	-0.0466722	-0.0466992	6.97623	0.873376	0.999668
L2-12a_Lch	LINE	LINE	-0.525583	-0.527888	4.32277	0.210677	0.999668
L2-12b_Lch	LINE	LINE	0.0554504	0.0554845	6.89728	0.866616	0.999668
L2-13B_DRe	L2	LINE	0.214502	0.215879	3.69032	0.764212	0.999668
L2-13b_Lch	LINE	LINE	0.189112	0.190627	3.36413	0.756214	0.999668
L2-14_DRe	L2	LINE	0.0754366	0.0754693	7.46666	0.801482	0.999668
L2-16_DRe	Rex-Babar	LINE	0.172407	0.172549	6.58005	0.563203	0.999668
L2-16_NVe	L2	LINE	-0.673532	-0.678973	3.59907	0.287644	0.999668
L2-17_DRe	L2	LINE	0.00319794	0.00318677	5.73617	0.994913	0.999668
L2-17_NV	L2	LINE	-0.387642	-0.390397	3.73281	0.488938	0.999668
L2-1c_Cis	L2	LINE	0.0509677	0.0510276	6.18758	0.899253	0.999668
L2-1_Croc	L2	LINE	-0.128719	-0.129312	3.81652	0.789845	0.999668
L2-1_DR	L2	LINE	-0.164208	-0.164262	7.94452	0.562349	0.999668
L2-1_FR1	L2	LINE	-0.211192	-0.211235	8.64027	0.381691	0.999668
L2-1_LCh	LINE	LINE	-0.195943	-0.196763	4.37665	0.683121	0.999668
L2-1_PM	L2	LINE	0.18538	0.185421	8.51111	0.458632	0.999668
L2-1_SIn	LINE	LINE	0.159301	0.159609	5.54824	0.683318	0.999668
L2-23_ACar	L2	LINE	-0.545285	-0.546096	5.75996	0.27705	0.999668
L2-25_ACar	L2	LINE	-0.950701	-0.95124	7.23599	0.0636467	0.999668
L2-2_NVi	L2	LINE	0.205466	0.206181	4.47299	0.706318	0.999668
L2-32_DRe	L2	LINE	0.191627	0.191747	7.00926	0.526162	0.999668
L2-33_DRe	L2	LINE	-1.08217	-1.08792	4.20387	0.16577	0.999668
L2-34_DR	L2	LINE	-0.293501	-0.293603	7.86337	0.479451	0.999668
L2-35_DRe	L2	LINE	-0.551094	-0.552893	4.65404	0.221726	0.999668
L2-36_DRe	L2	LINE	0.288974	0.29184	3.17818	0.617884	0.999668
L2-3_DRe	L2	LINE	-0.0166204	-0.0166235	8.86368	0.945501	0.999668
L2-41_DRe	L2	LINE	-0.18748	-0.187484	11.7538	0.342084	0.999668
L2-42_DRe	L2	LINE	-0.028416	-0.028426	7.80935	0.918386	0.999668
L2-43_DR	L2	LINE	0.114147	0.114162	9.22643	0.63267	0.999668
L2-44_DR	L2	LINE	0.165088	0.165157	7.56274	0.582488	0.999668
L2-45_DR	L2	LINE	0.308693	0.308812	7.71311	0.456339	0.999668
L2-46_DR	L2	LINE	0.183844	0.183893	8.25085	0.471933	0.999668
L2-47_DR	L2	LINE	0.0240808	0.024126	4.60702	0.964102	0.999668
L2-49_DR	L2	LINE	-0.528821	-0.529775	5.53097	0.162773	0.999668
L2-4_DRe	L2	LINE	0.30842	0.309212	5.01732	0.461188	0.999668
L2-4_LCh	LINE	LINE	0.324395	0.324946	5.581	0.388896	0.999668
L2-50_DR	L2	LINE	0.888929	0.894909	3.80086	0.191517	0.999668
L2-51_DR	L2	LINE	-0.371705	-0.371802	8.28151	0.151803	0.999668
L2-53_DR	L2	LINE	-0.26064	-0.260724	7.95396	0.374456	0.999668
L2-54_DR	L2	LINE	0.117445	0.117456	9.76947	0.619064	0.999668
L2-56_DR	L2	LINE	0.315881	0.317365	4.10923	0.559865	0.999668
L2-5_DRe	L2	LINE	0.243009	0.243718	4.78095	0.625935	0.999668
L2-5_LCh	LINE	LINE	0.251581	0.252056	5.41826	0.643894	0.999668
L2-5_NVi	L2	LINE	-0.483619	-0.484889	4.9215	0.338151	0.999668
L2-5_PM	L2	LINE	-0.010181	-0.0102062	5.9651	0.978693	0.999668
L2-5_XT	L2	LINE	0.169286	0.170322	3.60058	0.779323	0.999668
L2-68_HMa	L2	LINE	0.221055	0.222447	3.6939	0.720133	0.999668
L2-6_DRe	L2	LINE	-0.435804	-0.436173	6.63988	0.23932	0.999668
L2-6_LCh	LINE	LINE	0.669517	0.673137	4.03064	0.189642	0.999668
L2-6_XT	L2	LINE	0.0172055	0.0172168	6.11635	0.977178	0.999668
L2-7_DRe	L2	LINE	0.0640529	0.0640889	7.13702	0.8218	0.999668
L2-8_DR	L2	LINE	0.206091	0.206455	5.46642	0.615886	0.999668
L2-8_LCh	LINE	LINE	-0.219156	-0.219632	5.3439	0.555139	0.999668
L2-8_NVi	L2	LINE	0.0499935	0.0500226	7.08567	0.866306	0.999668
L2-9_AAe	L2	LINE	0.135972	0.136646	4.01605	0.794733	0.999668
L2-9_DRe	L2	LINE	1.0391	1.04809	3.51836	0.137229	0.999668
L2-9_LCh	LINE	LINE	0.185328	0.185759	5.04082	0.655442	0.999668
L2_AC_11	L2	LINE	0.216853	0.217087	6.2238	0.67176	0.999668
L2_AC_14	L2	LINE	0.178258	0.178349	7.32026	0.637434	0.999668
L2_AC_15	L2	LINE	-0.289323	-0.29177	3.59435	0.640875	0.999668
L2_AC_2	L2	LINE	-0.828967	-0.838787	3.13466	0.14604	0.999668
L2_AC_6	L2	LINE	-0.297083	-0.297512	5.74541	0.48384	0.999668
L2B-2_AAe	L2	LINE	0.54257	0.54336	5.87796	0.188022	0.999668
L2B-4_AAe	L2	LINE	-0.209532	-0.210253	4.4521	0.677914	0.999668
L2B-4B_AAe	L2	LINE	-0.0769869	-0.0770338	7.05292	0.806833	0.999668
L2B-5_AAe	L2	LINE	0.418416	0.420028	4.56568	0.325129	0.999668
L2_Plat1i	L2	LINE	-0.322767	-0.325416	3.59357	0.577929	0.999668
LatiHarb1-1	DNA	DNA	-0.253595	-0.254031	5.47141	0.568752	0.999668
LatiHarb1-2	DNA	DNA	0.159311	0.159372	7.70873	0.593516	0.999668
LIN11_SM	R2	LINE	-0.201748	-0.204037	3.17976	0.778116	0.999668
LIN4b_SM	R2	LINE	-0.0471714	-0.0471979	7.2667	0.872815	0.999668
LINE1E_OC	L1	LINE	-0.444962	-0.448497	3.33527	0.41505	0.999668
LINEX-1_DR	Retroposon	Retroposon	0.0645073	0.0645145	9.47173	0.784757	0.999668
LINEX-2_DR	Retroposon	Retroposon	0.370983	0.371846	5.22261	0.289724	0.999668
LmeSINE1e	SINE	SINE	0.581544	0.585623	3.65724	0.351341	0.999668
Loa-1_LHu	LINE	LINE	0.121186	0.121343	5.92589	0.792925	0.999668
LOOPERN2_DR	Kolobok-T2	DNA	-0.0528095	-0.0528207	8.50809	0.856517	0.999668
LOOPERN3B_DR	Kolobok-T2	DNA	0.18661	0.186807	6.3456	0.597791	0.999668
LOOPERN3_DR	Kolobok-T2	DNA	0.575019	0.581007	3.2076	0.388362	0.999668
LOOPERN6_DR	PiggyBac	DNA	-0.198179	-0.198823	4.79102	0.650239	0.999668
LSU-rRNA_Hsa	rRNA	rRNA	-0.228449	-0.228875	5.4275	0.529571	0.999668
LT46E_AMi-LTR	ERV4	LTR	-0.185816	-0.186752	4.01761	0.741658	0.999668
LTR11a_MD	ERV1	LTR	-0.478214	-0.478981	5.64094	0.274437	0.999668
LTR11_Ami	Gypsy	LTR	-0.0314741	-0.0314812	8.31314	0.919156	0.999668
LTR-12A_Crp	ERV1	LTR	0.335231	0.335382	7.51325	0.359571	0.999668
LTR-12B1_Crp	ERV1	LTR	0.281326	0.28191	5.32254	0.59814	0.999668
LTR-12B_Crp	ERV1	LTR	0.310869	0.314097	3.0841	0.656897	0.999668
LTR-12D_Crp	ERV1	LTR	0.658225	0.66483	3.18385	0.295774	0.999668
LTR-12D_Gav	ERV1	LTR	0.053031	0.0530409	8.73604	0.824833	0.999668
LTR13B_EE	ERVK	LTR	1.14089	1.15111	3.45982	0.0560663	0.999668
LTR-13_Crp	ERV4	LTR	-0.273775	-0.275813	3.70581	0.654617	0.999668
LTR-14A1_Crp	Gypsy	LTR	0.186115	0.186385	5.7768	0.747294	0.999668
LTR14D_SS	ERVK	LTR	-0.132264	-0.133584	3.59284	0.826428	0.999668
LTR-14_Gav	ERV4	LTR	0.148438	0.148863	4.7834	0.7804	0.999668
LTR-1525_AMi	Gypsy	LTR	0.14549	0.145635	6.33606	0.790918	0.999668
LTR160B_MD	ERV1	LTR	0.229011	0.229527	5.14142	0.653785	0.999668
LTR16D_ML	ERVK	LTR	-0.14855	-0.148694	6.43373	0.715368	0.999668
LTR16F_ML	ERVK	LTR	0.487503	0.493345	2.96653	0.540097	0.999668
LTR176A3_MD	ERV1	LTR	0.232363	0.234088	3.68748	0.722037	0.999668
LTR18F_ML	ERV1	LTR	0.0661746	0.066247	6.08391	0.905226	0.999668
LTR1B2_OG	ERV1	LTR	-0.250643	-0.251002	5.79126	0.530074	0.999668
LTR1B4b_Cho	ERVL-MaLR	LTR	-0.233179	-0.235445	3.50446	0.729588	0.999668
LTR-1B_NV	LTR	LTR	-0.38798	-0.388777	5.30342	0.346005	0.999668
LTR21_MD	ERV1	LTR	-0.012783	-0.0127931	6.78207	0.965288	0.999668
LTR24_Sar	ERVK	LTR	0.155328	0.155339	10.0651	0.559883	0.999668
LTR2B_ML	ERV1	LTR	0.0805975	0.0810652	3.53975	0.890859	0.999668
LTR2C_Opr	ERVK	LTR	-0.248685	-0.248831	7.10828	0.37488	0.999668
LTR-3_PBa-LTR	LTR	LTR	0.310939	0.311522	5.42939	0.537564	0.999668
LTR42_MD	ERV1	LTR	0.760717	0.76766	3.38102	0.235242	0.999668
LTR44B_MD	ERV1	LTR	-0.0527122	-0.0530255	4.13836	0.923885	0.999668
LTR4_Str	ERVK	LTR	0.0212684	0.0214911	4.36995	0.969924	0.999668
LTR-57C_Gav	Gypsy	LTR	0.329185	0.329801	5.42196	0.4462	0.999668
LTR5B	ERVK	LTR	1.0745	1.07772	4.95472	0.0607998	0.999668
LTR75B_EC	ERV1	LTR	0.0302117	0.0302547	4.9155	0.954021	0.999668
LTR80_MD	ERV1	LTR	0.125987	0.126019	8.35216	0.676146	0.999668
LTR93_MD	ERVK	LTR	0.0343928	0.0345214	4.25775	0.956632	0.999668
LTRX1-I_XT	Copia	LTR	-0.273161	-0.273195	9.34218	0.469256	0.999668
MamGyp-int	Gypsy	LTR	-0.0514114	-0.0519369	3.80839	0.922419	0.999668
Mariner-101_HSal	DNA	DNA	-0.719956	-0.720887	6.04062	0.0550681	0.999668
Mariner-10_DR	TcMar-Tc1	DNA	0.45753	0.458601	5.17586	0.22949	0.999668
Mariner-11_DR	TcMar-Tc1	DNA	-0.0594228	-0.0594718	6.72836	0.847008	0.999668
Mariner-11_LCh	DNA	DNA	-0.202196	-0.203653	3.74557	0.720662	0.999668
Mariner-13_SIn	DNA	DNA	0.52015	0.522686	4.15673	0.337198	0.999668
Mariner-14_CGi	TcMar-Tc1	DNA	0.323743	0.325158	4.27968	0.551616	0.999668
Mariner-14_LCh	DNA	DNA	-0.0193918	-0.0193945	9.30821	0.944273	0.999668
Mariner-14_SIn	DNA	DNA	0.474297	0.474759	6.41813	0.350492	0.999668
Mariner-15_SIn	DNA	DNA	-0.0973512	-0.0973774	8.17332	0.716398	0.999668
Mariner-16_SIn	DNA	DNA	0.573588	0.574291	6.10209	0.124745	0.999668
Mariner-17_AEc	DNA	DNA	0.0478225	0.0478359	8.25349	0.857711	0.999668
Mariner-18_HSal	DNA	DNA	0.0163255	0.0163286	8.80374	0.947581	0.999668
Mariner-18_SIn	DNA	DNA	-0.0036115	-0.0036099	6.79059	0.990898	0.999668
Mariner-19_HSal	DNA	DNA	0.08338	0.0836024	5.16241	0.844551	0.999668
Mariner-1_BF	TcMar-Tc1	DNA	-0.0702667	-0.0704917	4.16675	0.897672	0.999668
Mariner-1_DR	TcMar-Tc1	DNA	-0.0680294	-0.0680354	9.82466	0.762521	0.999668
Mariner1_DYa	TcMar-Mariner	DNA	0.294732	0.295557	4.88197	0.643333	0.999668
Mariner-1_OL	TcMar-ISRm11	DNA	-0.197272	-0.197414	6.87763	0.553382	0.999668
Mariner-21N3_CGi	TcMar-m44	DNA	-0.0109269	-0.010933	7.65853	0.976284	0.999668
Mariner-21_SIn	DNA	DNA	0.1195	0.119553	7.46636	0.680759	0.999668
Mariner-23_AEc	DNA	DNA	0.605286	0.609681	3.61357	0.299247	0.999668
Mariner-23_LCh	DNA	DNA	0.0265952	0.0266164	5.96012	0.942411	0.999668
Mariner-25_LCh	DNA	DNA	0.0360658	0.0362264	3.55008	0.946979	0.999668
Mariner-26_SM	TcMar-Tigger	DNA	-0.273041	-0.273368	6.07023	0.45495	0.999668
Mariner-29_AEc	DNA	DNA	-0.635636	-0.63588	7.7626	0.0577684	0.999668
Mariner-29_HM	TcMar-Fot1	DNA	-0.0318418	-0.0318608	7.27506	0.938552	0.999668
Mariner-2_DR	TcMar-Tc1	DNA	-0.126174	-0.126476	5.13703	0.756917	0.999668
Mariner-2_GA	TcMar-ISRm11	DNA	-0.198492	-0.19869	6.29363	0.612686	0.999668
Mariner-2_HM	TcMar-Fot1	DNA	-0.0949432	-0.0949682	8.22735	0.766227	0.999668
Mariner-2_OL	TcMar-ISRm11	DNA	0.594461	0.595776	5.27064	0.234712	0.999668
Mariner-30_HM	TcMar-Fot1	DNA	-0.0826971	-0.0827783	6.25678	0.802947	0.999668
Mariner-31_HM	TcMar-Fot1	DNA	0.687849	0.690148	4.69266	0.18198	0.999668
Mariner-34_SM	TcMar-Pogo	DNA	0.392667	0.395193	3.79664	0.557562	0.999668
Mariner-35_SM	TcMar-Pogo	DNA	0.927262	0.935908	3.40191	0.124365	0.999668
Mariner-36_HM	TcMar-Fot1	DNA	-1.16624	-1.17651	3.37468	0.0931982	0.999668
Mariner-38B_SIn	DNA	DNA	-0.0356028	-0.0356438	5.9408	0.915533	0.999668
Mariner-38_HM	TcMar-Fot1	DNA	-0.160659	-0.161456	4.28689	0.836275	0.999668
Mariner-39_HM	TcMar-Fot1	DNA	-0.130484	-0.130648	6.11388	0.720753	0.999668
Mariner-3_DBi	TcMar-Tc1	DNA	0.0962844	0.0969588	3.35758	0.860167	0.999668
Mariner-3_DR	TcMar-ISRm11	DNA	0.802406	0.807868	3.79132	0.200645	0.999668
Mariner-3_GA	TcMar-ISRm11	DNA	-0.338586	-0.338848	6.75727	0.286134	0.999668
Mariner-3_OL	TcMar-ISRm11	DNA	0.0762961	0.0763805	6.2775	0.825168	0.999668
Mariner-4_DAn	TcMar-Tc1	DNA	-0.0107284	-0.0108695	3.81566	0.985964	0.999668
Mariner-4_DR	TcMar-Tc1	DNA	0.0320653	0.0320663	11.2942	0.883903	0.999668
Mariner-4_LHu	DNA	DNA	-0.236859	-0.238839	3.3341	0.63066	0.999668
Mariner-52_HSal	DNA	DNA	-0.117638	-0.117663	8.55102	0.657618	0.999668
Mariner-52N1_HSal	DNA	DNA	0.151136	0.151255	6.65131	0.678042	0.999668
Mariner-59N1_HSal	DNA	DNA	0.161891	0.162022	6.62279	0.604332	0.999668
Mariner-5_CFl	DNA	DNA	-0.190982	-0.191143	6.63086	0.636415	0.999668
Mariner-5_DBp	TcMar-Tc1	DNA	0.417324	0.418171	5.37747	0.300162	0.999668
Mariner-5_XT	TcMar-Tc2	DNA	0.00117519	0.00117603	7.7126	0.99664	0.999668
Mariner-62_HSal	DNA	DNA	-0.0149798	-0.0149807	10.2842	0.949448	0.999668
Mariner-68_HSal	DNA	DNA	-0.232843	-0.232932	7.68843	0.495817	0.999668
Mariner-6_DF	TcMar-Mariner	DNA	-0.173012	-0.173042	8.86042	0.577411	0.999668
Mariner-6_DR	TcMar-Tc1	DNA	-0.178834	-0.178852	9.63615	0.414297	0.999668
Mariner-79B_HSal	DNA	DNA	-0.11168	-0.111731	7.53715	0.729538	0.999668
Mariner-79_HSal	DNA	DNA	0.290351	0.290652	6.30284	0.580769	0.999668
Mariner-7_DR	TcMar-Tc1	DNA	-0.349861	-0.35039	5.83132	0.505021	0.999668
Mariner-7_XT	DNA	DNA	0.0511173	0.0511587	6.43553	0.88475	0.999668
Mariner-801_AMi	TcMar-Tigger	DNA	0.385375	0.386859	4.43288	0.501713	0.999668
Mariner-87N1_HSal	DNA	DNA	0.772895	0.775265	4.86669	0.22584	0.999668
Mariner-8_DR	TcMar-Tc1	DNA	0.22806	0.22963	3.70543	0.721976	0.999668
Mariner-8_LCh	DNA	DNA	0.365106	0.365299	7.28858	0.481754	0.999668
Mariner-91_HSal	DNA	DNA	-0.216996	-0.219836	3.14149	0.744746	0.999668
Mariner-9_DF	TcMar-Tc1	DNA	0.0456813	0.0459513	3.35059	0.941157	0.999668
Mariner-9_DR	TcMar-Tc1	DNA	0.366075	0.366514	6.09659	0.460549	0.999668
Mariner-9_HM	TcMar-Fot1	DNA	0.149634	0.149734	6.96557	0.659041	0.999668
Mariner-N10_HSal	DNA	DNA	-0.859791	-0.860152	7.66326	0.0964101	0.999668
Mariner-N10_SIn	DNA	DNA	0.152746	0.153099	5.22286	0.687945	0.999668
Mariner-N13_DR	TcMar-Tc1	DNA	0.0153449	0.0153452	11.9534	0.942204	0.999668
Mariner-N13_HSal	DNA	DNA	-0.0405878	-0.0405897	10.6938	0.852484	0.999668
Mariner-N14_DR	TcMar-Tigger	DNA	0.0188455	0.0188474	9.5309	0.935208	0.999668
Mariner-N22_HSal	DNA	DNA	-0.268133	-0.268235	7.72626	0.43926	0.999668
Mariner-N27_HSal	DNA	DNA	-0.496914	-0.497279	6.791	0.294633	0.999668
MarinerN2_AG	TcMar-Tc1	DNA	0.539359	0.54604	2.98468	0.458633	0.999668
Mariner-N2_DR	TcMar	DNA	-0.374483	-0.375455	4.98665	0.334104	0.999668
Mariner-N39_HSal	DNA	DNA	0.0264923	0.0265571	4.03927	0.965245	0.999668
Mariner-N3_CFl	DNA	DNA	-0.931394	-0.934508	4.68465	0.0568613	0.999668
Mariner-N3_DR	CMC-EnSpm	DNA	0.0897378	0.0902775	3.57042	0.866874	0.999668
Mariner-N41_HSal	DNA	DNA	-0.170918	-0.171031	6.96018	0.566306	0.999668
Mariner-N5_DR	TcMar	DNA	0.185535	0.186229	4.34866	0.755539	0.999668
Mariner-N5_HSal	DNA	DNA	0.0893425	0.0893658	8.32344	0.737054	0.999668
Maui	L2	LINE	0.0189733	0.0189735	13.4968	0.928101	0.999668
Mdo2LTR2b-int	ERV1	LTR	-0.709678	-0.714609	3.6131	0.21707	0.999668
MdoERV2-int	ERV1	LTR	0.969559	0.97352	4.48936	0.0883058	0.999668
MdoLTR2-int	ERV1	LTR	0.107679	0.107977	4.90921	0.814464	0.999668
MdoLTR4-int	ERV1	LTR	0.272646	0.27481	3.3348	0.632654	0.999668
Meg_PVa	5S	SINE	0.137557	0.138052	4.38496	0.822569	0.999668
MER31-int	ERV1	LTR	0.948425	0.951089	5.03247	0.057496	0.999668
MER41-int	ERV1	LTR	0.633778	0.638558	3.67217	0.211444	0.999668
MER4-int	ERV1	LTR	-0.199087	-0.199612	5.07557	0.730996	0.999668
MER50-int	ERV1	LTR	0.258477	0.258864	5.78517	0.625811	0.999668
MER51D	ERV1	LTR	-0.486973	-0.488088	5.16843	0.292607	0.999668
MER6	TcMar-Tigger	DNA	-0.0676772	-0.0677012	7.75663	0.80924	0.999668
MER6A	TcMar-Tigger	DNA	0.101765	0.101953	5.48082	0.794398	0.999668
MER83A-int	ERV1	LTR	0.187149	0.187613	5.03027	0.725834	0.999668
Merlin-1_DR	Merlin	DNA	-0.0139161	-0.0139169	10.275	0.950598	0.999668
MINIME_DN	Unknown	Unknown	-0.327344	-0.327419	8.493	0.186813	0.999668
MinoAg1	R1	LINE	-0.0228429	-0.022877	6.04242	0.947629	0.999668
MIRAGE1	CMC-Mirage	DNA	-0.0089253	-0.00852059	3.39341	0.991784	0.999668
MIR_Aves1	MIR	SINE	0.164446	0.165136	4.29386	0.680047	0.999668
MIR_Aves2	MIR	SINE	-0.373422	-0.375826	3.63152	0.517776	0.999668
MMERVK9C_I-int	ERVK	LTR	0.202967	0.20451	3.74608	0.708479	0.999668
MMERVK9E_I-int	ERVK	LTR	-0.293765	-0.296044	3.72683	0.667867	0.999668
MMSAT4	Satellite	Satellite	-0.301873	-0.302191	6.25884	0.363486	0.999668
Mon1a8	MIR	SINE	0.200166	0.200803	4.83758	0.60548	0.999668
MonoRep204	Segmental	Segmental	0.037736	0.0379634	3.91711	0.934487	0.999668
MOSAT-2_DR	Satellite	Satellite	-0.329191	-0.331105	3.99762	0.543279	0.999668
Mothra_OL	TcMar-Tc1	DNA	-0.256095	-0.256641	5.33055	0.451515	0.999668
MRE1_OL	Unknown	Unknown	-0.901756	-0.903875	5.12968	0.129737	0.999668
MSAT_MG	Satellite	Satellite	-0.421181	-0.422173	5.07021	0.360626	0.999668
MuDr-1_BF	MULE-NOF	DNA	0.475403	0.477555	4.26536	0.377422	0.999668
MuDR-1_DR	MULE-NOF	DNA	0.37194	0.373356	4.52673	0.375534	0.999668
MuDR-1_NV	MULE-MuDR	DNA	0.408754	0.411085	3.91682	0.465558	0.999668
MuDR-1_SIn	DNA	DNA	0.102949	0.103054	6.33322	0.757708	0.999668
MuDr-1x_AP	MULE-MuDR	DNA	0.365851	0.366009	7.55528	0.287573	0.999668
MuDr-1x_SP	MULE-MuDR	DNA	-0.0838484	-0.0839859	5.48	0.845048	0.999668
MuLV-int	ERV1	LTR	0.0114864	0.0114172	3.4184	0.986597	0.999668
MurERV4_19-int	ERVK	LTR	0.0927309	0.0928054	6.64054	0.792309	0.999668
Mutsu-1_SK	L1-Tx1	LINE	0.255616	0.25638	4.85348	0.520761	0.999668
Nematis_Cr	Penelope	LINE	0.691239	0.69582	3.74244	0.190303	0.999668
Neptune_Hyd	Penelope	LINE	0.198295	0.19835	8.17139	0.458412	0.999668
NERV5_MD_I-int	ERV1	LTR	0.17814	0.178723	4.63625	0.778125	0.999668
Ngaro1_DR	Ngaro	LTR	0.200825	0.201152	5.57863	0.636151	0.999668
nhAT-1_EF	hAT-Charlie	DNA	0.17458	0.174899	5.53422	0.623085	0.999668
nhAT-3_EF	hAT-Charlie	DNA	-0.371052	-0.374678	3.21143	0.519352	0.999668
Nimb-12_DR	I	LINE	-1.97645	-1.98841	3.9426	0.0480559	0.999668
Nimb-14_DR	I	LINE	-0.0128008	-0.0128047	8.04592	0.960361	0.999668
Nimb-15_DR	I	LINE	0.450384	0.451708	4.83491	0.291924	0.999668
Nimb-16_DR	I	LINE	-0.171983	-0.172327	5.44711	0.750664	0.999668
Nimb-1_DR	I	LINE	-0.74119	-0.74202	6.19469	0.150261	0.999668
Nimb-2_DR	I	LINE	0.398007	0.399948	4.10578	0.417609	0.999668
Nimb-4_DR	I	LINE	0.11696	0.117005	7.65784	0.711672	0.999668
Nimb-8_DR	I	LINE	-0.271198	-0.271522	6.04441	0.566267	0.999668
Nimb-9_DR	I	LINE	0.380656	0.383328	3.66819	0.476035	0.999668
Nimbus	I	LINE	-0.0212483	-0.0215359	3.88828	0.968014	0.999668
NonLTR-1C_DR	Retroposon	Retroposon	0.469361	0.470119	5.6932	0.359553	0.999668
NonLTR-1_DR	Retroposon	Retroposon	-0.697505	-0.70117	4.01521	0.28474	0.999668
OK	tRNA-Core	SINE	-0.370051	-0.370702	5.62211	0.403239	0.999668
ONSATB	Satellite	Satellite	0.406674	0.407014	6.64985	0.237282	0.999668
OSSINE1	5S-Deu-L2	SINE	0.159703	0.160737	3.70245	0.752575	0.999668
P-11_HM	P	DNA	0.651733	0.653722	4.82935	0.113239	0.999668
P-19_HM	P	DNA	0.570009	0.572834	4.11617	0.274378	0.999668
P-1_DR	P	DNA	0.698373	0.70063	4.77624	0.205972	0.999668
P-24_HM	P	DNA	-0.121389	-0.121548	5.88388	0.807521	0.999668
P-26_HM	P	DNA	-0.502493	-0.504829	4.30744	0.474601	0.999668
P-27_HM	P	DNA	0.86193	0.862519	6.98734	0.0691726	0.999668
P-29_HM	P	DNA	-0.0143738	-0.0143863	6.0639	0.964112	0.999668
P-2_HM	P	DNA	0.20503	0.205429	5.3629	0.677478	0.999668
P-2_PBa	DNA	DNA	0.587822	0.59015	4.46992	0.353391	0.999668
P-30_HM	P	DNA	0.468589	0.46896	6.70878	0.196507	0.999668
P-34_HM	P	DNA	0.259515	0.259629	7.53682	0.58706	0.999668
P-35_HM	P	DNA	0.0723211	0.0723387	8.35537	0.871865	0.999668
PALTTTAAA3	DNA	DNA	0.548457	0.550855	4.31289	0.3436	0.999668
PAO_LTR	Pao	LTR	-0.170169	-0.171271	3.8985	0.759179	0.999668
P_DB	P	DNA	0.32726	0.328251	4.79554	0.556523	0.999668
Penelope-12_HM	Penelope	LINE	0.0729676	0.0729811	8.73157	0.831443	0.999668
Penelope-12_XT	Penelope	LINE	0.51457	0.515768	5.18293	0.323696	0.999668
Penelope-13_HM	Penelope	LINE	-0.092346	-0.0923815	7.65954	0.792301	0.999668
Penelope-1_ADi	Penelope	LINE	-0.510271	-0.515529	3.25934	0.497075	0.999668
Penelope-1_AFC	Penelope	LINE	0.0499635	0.0499642	12.5384	0.811858	0.999668
Penelope-1_DR	Penelope	LINE	0.157419	0.15746	8.27099	0.550601	0.999668
Penelope1D_XT	Penelope	LINE	0.369716	0.370497	5.2889	0.491561	0.999668
Penelope-1_Gav	Penelope	LINE	0.0645751	0.0647771	4.2881	0.896279	0.999668
Penelope-1_OL	Penelope	LINE	0.10139	0.101777	4.59088	0.847442	0.999668
Penelope-1_SIn	LINE	LINE	0.0917956	0.092252	3.9129	0.898888	0.999668
Penelope-2_DR	Penelope	LINE	0.363567	0.36519	4.31886	0.649035	0.999668
Penelope-5_NV	Penelope	LINE	0.00378668	0.00367306	3.24108	0.995757	0.999668
Penelope-5_XT	Penelope	LINE	0.142594	0.142605	10.033	0.598914	0.999668
Penelope-6_XT	Penelope	LINE	0.294236	0.294494	6.52842	0.486113	0.999668
Penelope-7_XT	Penelope	LINE	0.729679	0.733049	4.28307	0.181289	0.999668
Penelope-8_NV	Penelope	LINE	0.244791	0.24619	3.8682	0.713393	0.999668
Penelope_Ele2	Penelope	LINE	0.414972	0.416137	4.90558	0.458107	0.999668
Perere-3	RTE	LINE	0.251852	0.254666	2.94266	0.71105	0.999668
piggyBac-1_AMi	PiggyBac	DNA	-0.21774	-0.218853	4.22348	0.737923	0.999668
piggyBac-1_BF	PiggyBac	DNA	-0.206506	-0.206845	5.72929	0.552292	0.999668
piggyBac-1_DR	PiggyBac	DNA	0.386336	0.386473	7.87874	0.180506	0.999668
piggyBac-20_SM	PiggyBac	DNA	-0.451244	-0.454211	3.59575	0.468249	0.999668
piggyBac-2_SM	PiggyBac	DNA	-1.35821	-1.3659	3.95108	0.0510172	0.999668
piggyBac-2_XT	PiggyBac	DNA	-0.577516	-0.577649	8.48677	0.169395	0.999668
piggyBac-4_CGi	PiggyBac	DNA	0.37918	0.381256	4.01073	0.485505	0.999668
piggyBac-5_CGi	PiggyBac	DNA	0.0601145	0.0602614	3.30867	0.918758	0.999668
piggyBac-9_SM	PiggyBac	DNA	-0.287976	-0.288531	5.3393	0.501019	0.999668
piggyBac-N10_DR	PiggyBac	DNA	0.244354	0.245798	3.80279	0.687177	0.999668
piggyBac-N11_DR	PiggyBac	DNA	-0.134528	-0.134697	5.98044	0.693241	0.999668
piggyBac-N12_DR	PiggyBac	DNA	-0.253302	-0.25338	8.06414	0.342859	0.999668
piggyBac-N13_DR	PiggyBac	DNA	0.169865	0.171317	3.36383	0.758188	0.999668
piggyBac-N2A_XT	PiggyBac	DNA	0.397667	0.399331	4.35595	0.558607	0.999668
piggyBac-N4_NV	PiggyBac	DNA	-0.0595724	-0.0600221	3.86946	0.922693	0.999668
piggyBac-N5_DR	PiggyBac	DNA	0.663891	0.665499	5.14925	0.180568	0.999668
piggyBac-N6_DR	PiggyBac	DNA	-0.0346122	-0.0346565	5.87236	0.919676	0.999668
PIGGYB_SM	PiggyBac	DNA	-0.44122	-0.442909	4.42503	0.458665	0.999668
Pigibakku	PiggyBac	DNA	0.0694645	0.0694803	8.44088	0.779793	0.999668
PlatLTR35b	ERVL	LTR	-0.357737	-0.358416	5.41954	0.401697	0.999668
PlatSat2A	Satellite	Satellite	-0.233506	-0.233962	5.50922	0.632509	0.999668
POLINTN1_SM	DNA	DNA	-0.394671	-0.397609	3.41692	0.538143	0.999668
Polinton-1_AMi	Maverick	DNA	0.348828	0.351703	3.36518	0.599066	0.999668
Polinton-1_CGi	Maverick	DNA	-0.974546	-0.97927	4.11485	0.103783	0.999668
Polinton-1_CPB	Maverick	DNA	0.791423	0.793799	4.94279	0.0865942	0.999668
Polinton-1_DGr	Maverick	DNA	0.227788	0.229818	3.21567	0.742839	0.999668
Polinton-1_DPe	Maverick	DNA	-0.510088	-0.517052	2.95272	0.445875	0.999668
Polinton-1_DR	Maverick	DNA	-0.00354832	-0.00354843	10.7548	0.98771	0.999668
Polinton-1_LCh	DNA	DNA	0.722095	0.723336	5.63446	0.099769	0.999668
Polinton-1N1_DR	Maverick	DNA	0.0863914	0.0864369	7.31483	0.778321	0.999668
Polinton-1_NVi	Maverick	DNA	0.1707	0.171242	4.68989	0.674739	0.999668
Polinton-1_PBa	DNA	DNA	-0.549082	-0.555545	3.18385	0.331828	0.999668
Polinton-1_SM	Maverick	DNA	0.27988	0.280435	5.37723	0.600461	0.999668
Polinton1_SM	Maverick	DNA	0.180831	0.180891	7.95082	0.569934	0.999668
Polinton-1_SP	Maverick	DNA	0.0634155	0.0634239	9.22392	0.803268	0.999668
Polinton-1_SPU	Maverick	DNA	-0.0461695	-0.0466902	3.85827	0.932549	0.999668
Polinton-2_AMi	Maverick	DNA	0.417116	0.417643	6.07485	0.2528	0.999668
Polinton-2A_NV	Maverick	DNA	0.209842	0.209885	8.62003	0.505658	0.999668
Polinton-2_CI	Maverick	DNA	-0.0342653	-0.0343416	4.43262	0.943917	0.999668
Polinton-2_DR	Maverick	DNA	-0.377923	-0.378274	6.45151	0.265099	0.999668
Polinton-2_HM	Maverick	DNA	-0.456489	-0.456649	7.86504	0.242909	0.999668
Polinton-2_NV	Maverick	DNA	-0.875493	-0.87823	4.76921	0.103849	0.999668
Polinton-2_PBa	DNA	DNA	0.395002	0.395185	7.46992	0.380632	0.999668
Polinton-2_XT	Maverick	DNA	0.299167	0.301906	3.2002	0.597479	0.999668
Polinton-3_HM	Maverick	DNA	0.556291	0.561416	3.31998	0.403969	0.999668
Polinton-3_SP	Maverick	DNA	-1.16375	-1.16907	4.25508	0.0527112	0.999668
Polinton-3_TC	Maverick	DNA	0.886222	0.892829	3.64402	0.143778	0.999668
Polinton-4_NV	Maverick	DNA	-0.15871	-0.158812	6.98106	0.638706	0.999668
Polinton-5_NV	Maverick	DNA	-0.430836	-0.43331	3.97498	0.471464	0.999668
Polinton-5_NVi	Maverick	DNA	0.0348937	0.0349048	8.09304	0.937861	0.999668
Polinton-5_SP	Maverick	DNA	-1.00512	-1.0202	2.8634	0.125224	0.999668
Polinton-7_NVi	Maverick	DNA	0.313279	0.313552	6.56022	0.536644	0.999668
Polinton-8_NVi	Maverick	DNA	0.155095	0.155215	6.63855	0.6704	0.999668
Polinton-9_NVi	Maverick	DNA	-0.126973	-0.127055	6.92382	0.75507	0.999668
Poseidon-1C_PM	Penelope	LINE	0.348162	0.349152	4.91656	0.469491	0.999668
PRIMA4-int	ERV1	LTR	-0.180655	-0.180755	7.16261	0.567001	0.999668
PRIMAX-int	ERV1	LTR	0.00519838	0.00518862	3.83593	0.994394	0.999668
Proto2-6_CS1	Proto2	LINE	-0.169355	-0.169584	6.00152	0.766522	0.999668
Proto2-7_CS1	Proto2	LINE	-0.040054	-0.0400783	7.20731	0.885863	0.999668
PTERV2b-int	ERV1	LTR	0.0958569	0.095894	7.71106	0.804739	0.999668
PVSAT	Satellite	Satellite	0.0411231	0.0412453	4.33773	0.941597	0.999668
R1-18_DWi	R1	LINE	-0.146171	-0.147125	3.97547	0.783941	0.999668
R1-2_DEl	R1	LINE	0.0548508	0.0554118	3.93215	0.929946	0.999668
R1-3_DEl	R1	LINE	0.524316	0.528187	3.57995	0.448508	0.999668
R1-4_DWi	R1	LINE	0.130517	0.130792	5.48375	0.751589	0.999668
R1-5_BM	R1	LINE	-0.215912	-0.216772	4.38308	0.611307	0.999668
R1_DEr	R1	LINE	0.376933	0.3792	3.84775	0.543208	0.999668
R1_DYa	R1	LINE	-0.00824806	-0.00824946	8.42044	0.979998	0.999668
R1_Ele4	R1	LINE	0.27426	0.275381	4.26744	0.613092	0.999668
R2-N2_Gav	R2	LINE	0.82906	0.833435	4.12267	0.179502	0.999668
R7Ag2	R1	LINE	-0.275584	-0.275803	6.63313	0.516904	0.999668
RatERVL-int	ERVL	LTR	-0.234265	-0.2368	2.92578	0.747391	0.999668
RC123	Satellite	Satellite	0.362147	0.363037	5.06756	0.478038	0.999668
Rehavkus-1_CS	MULE-NOF	DNA	-0.364265	-0.366282	3.81929	0.527215	0.999668
Rehavkus-2_NVi	MULE-NOF	DNA	0.00228323	0.00227942	6.3906	0.99431	0.999668
REP131	DNA	DNA	0.793192	0.79895	3.70453	0.232967	0.999668
REP-13_CPB	Unknown	Unknown	0.556177	0.561382	3.28795	0.409664	0.999668
REP-1_DEl	Unknown	Unknown	-0.106681	-0.107278	4.29079	0.848121	0.999668
REP-2_CPB	Unknown	Unknown	-0.16443	-0.165399	4.1282	0.762549	0.999668
REP-4_CQ	Unknown	Unknown	-0.409937	-0.412397	4.00983	0.470464	0.999668
REP-4_PBa	Unknown	Unknown	0.0184262	0.0184267	11.458	0.936632	0.999668
REP-6_CPB	Unknown	Unknown	-0.514356	-0.515764	4.87089	0.272792	0.999668
Rex1-1_ACar	Rex-Babar	LINE	0.72915	0.729732	6.76722	0.101499	0.999668
REX1-1_AFC	Rex-Babar	LINE	0.122039	0.122044	10.873	0.575399	0.999668
Rex1-1B_FR	Rex-Babar	LINE	-0.155965	-0.155979	9.87105	0.548266	0.999668
Rex1-1_FR	Rex-Babar	LINE	0.318136	0.318237	8.03978	0.226082	0.999668
REX1-1_GA	Rex-Babar	LINE	-0.178843	-0.178959	6.99342	0.535145	0.999668
REX1-1_XT	Rex-Babar	LINE	-0.198788	-0.198801	10.3307	0.445388	0.999668
Rex1-21_DRe	Rex-Babar	LINE	0.513193	0.513691	6.43059	0.328345	0.999668
Rex1-23_DRe	Rex-Babar	LINE	0.115585	0.115752	5.90135	0.753978	0.999668
Rex1-23_NV	Rex-Babar	LINE	0.974877	0.983734	3.46314	0.179563	0.999668
Rex1-26_DRe	Rex-Babar	LINE	-0.00815847	-0.00816031	8.26475	0.975399	0.999668
Rex1-28_DRe	Rex-Babar	LINE	-0.560681	-0.564136	3.75746	0.392915	0.999668
Rex1-29_DRe	Rex-Babar	LINE	0.157911	0.158067	6.30081	0.68267	0.999668
REX1-2_AFC	Rex-Babar	LINE	-0.0409593	-0.0409613	10.6667	0.849754	0.999668
REX1-2_DR	Rex-Babar	LINE	0.243623	0.24394	5.94823	0.483216	0.999668
Rex1-2_FR	Rex-Babar	LINE	-0.0806297	-0.0806766	7.04696	0.778108	0.999668
Rex1-2_PM	Rex-Babar	LINE	-0.531797	-0.532467	6.03462	0.141391	0.999668
REX1-2_XT	Rex-Babar	LINE	-0.336558	-0.336621	8.76383	0.223488	0.999668
Rex1-30_DRe	Rex-Babar	LINE	-0.474786	-0.479977	3.02538	0.452901	0.999668
Rex1-31_DRe	Rex-Babar	LINE	0.0818213	0.0818261	10.4476	0.71814	0.999668
REX1-3_AFC	Rex-Babar	LINE	-0.0868279	-0.0868317	10.8361	0.690393	0.999668
Rex1-3_FR	Rex-Babar	LINE	0.0375073	0.0375206	7.75501	0.888749	0.999668
Rex1-40_DRe	Rex-Babar	LINE	-0.029226	-0.029261	6.10925	0.926851	0.999668
REX1-4_AFC	Rex-Babar	LINE	-0.0701249	-0.0701288	10.5123	0.748564	0.999668
REX1-4_DR	Rex-Babar	LINE	-0.379434	-0.37989	6.05256	0.364815	0.999668
REX1-4_XT	Rex-Babar	LINE	0.0208944	0.0209097	6.14291	0.953686	0.999668
REX1-5_DR	Rex-Babar	LINE	-0.149952	-0.150051	6.92958	0.598803	0.999668
REX1-5_XT	Rex-Babar	LINE	0.346722	0.34676	9.53466	0.347399	0.999668
Rex1-6_DR	Rex-Babar	LINE	0.0353904	0.0354254	6.73204	0.925668	0.999668
REX1-6_XT	Rex-Babar	LINE	0.115262	0.115301	7.93402	0.660749	0.999668
REX1-7_DR	Rex-Babar	LINE	-0.170456	-0.170524	7.63769	0.611392	0.999668
REX1-7_XT	Rex-Babar	LINE	0.0397385	0.0397567	7.58052	0.884147	0.999668
REX1-8_DR	Rex-Babar	LINE	-0.227051	-0.228151	4.15293	0.595563	0.999668
REX1-8_XT	Rex-Babar	LINE	0.594959	0.598936	3.89532	0.294976	0.999668
REX1-9_DR	Rex-Babar	LINE	0.625336	0.627807	4.48732	0.14925	0.999668
REX1-9_XT	Rex-Babar	LINE	-0.435267	-0.441181	2.98046	0.581576	0.999668
REX1_CY	Rex-Babar	LINE	-0.105689	-0.105813	6.04075	0.771673	0.999668
REX1_FS	Rex-Babar	LINE	0.0193131	0.0193044	3.48587	0.972482	0.999668
Rex1_FurC	Rex-Babar	LINE	-0.0499289	-0.0499339	9.65963	0.823638	0.999668
REX3_XM	RTE	LINE	-0.094583	-0.094599	8.86389	0.705909	0.999668
REX5	L2	LINE	0.145726	0.14577	8.05243	0.583816	0.999668
RLTR14-int	ERV1	LTR	-0.316201	-0.316911	5.15306	0.540931	0.999668
RLTR17B_Mm	ERVK	LTR	0.201815	0.202546	4.49643	0.75377	0.999668
RLTR19-int	ERVK	LTR	-0.377488	-0.377902	6.19614	0.288004	0.999668
RLTR20A4	ERVK	LTR	-0.0225232	-0.0225297	8.17656	0.92881	0.999668
RLTR20C1_MM	ERVK	LTR	-0.194717	-0.194777	8.0323	0.466684	0.999668
RLTR20C2_MM	ERVK	LTR	0.159712	0.15993	5.9749	0.648508	0.999668
RLTR32_Rn	ERVK	LTR	-0.532923	-0.532948	10.7776	0.156327	0.999668
RLTR45-int	ERVK	LTR	-0.147065	-0.147518	4.93129	0.780559	0.999668
RLTR51A_Mm	ERVK	LTR	-0.17853	-0.179968	3.30399	0.771295	0.999668
RLTR9A3A	ERVK	LTR	-0.450319	-0.455675	3.11329	0.431511	0.999668
RMER12C	ERVK	LTR	-0.125211	-0.125913	4.24602	0.827452	0.999668
RMER16_Mm	ERVK	LTR	-0.235279	-0.235426	6.98784	0.565014	0.999668
AlRepA-102	TcMar-Tc1	DNA	0.00598679	0.00598682	13.83	0.977273	0.999668
AlRepA-115	DNA	DNA	0.032701	0.0327013	13.1664	0.876208	0.999668
AlRepA-125	PiggyBac	DNA	0.102245	0.102249	11.0944	0.632691	0.999668
AlRepA-208	hAT-Charlie	DNA	0.0704282	0.0704313	10.8388	0.740409	0.999668
AlRepA-21	L2	LINE	-0.0332715	-0.0332722	11.8983	0.875801	0.999668
AlRepA-24	MIR	SINE	-0.00520646	-0.00520654	12.4107	0.980458	0.999668
AlRepA-297	Unknown	Unknown	0.0297915	0.0297925	11.1817	0.89342	0.999668
AlRepA-386	Ngaro	LTR	-0.0345483	-0.0345491	11.7271	0.870892	0.999668
AlRepA-4	hAT-Charlie	DNA	0.0516201	0.0516208	12.5834	0.811505	0.999668
AlRepA-485	tRNA-Core	SINE	0.0075893	0.00758954	11.1975	0.971792	0.999668
AlRepA-51	Unknown	Unknown	0.00427975	0.00427977	14.0277	0.983806	0.999668
AlRepA-66	hAT-Ac	DNA	0.0446128	0.0446146	10.9185	0.836491	0.999668
AlRepA-93	L2	LINE	-0.0081495	-0.00814958	12.9842	0.969097	0.999668
AlRepB-103	RTE-BovB	LINE	-0.0423479	-0.0423482	13.1034	0.839835	0.999668
AlRepB-11	DNA	DNA	0.111413	0.111419	10.4689	0.644856	0.999668
AlRepB-112	Unknown	Unknown	0.00655754	0.00655762	12.8608	0.975148	0.999668
AlRepB-114	Ngaro	LTR	0.162512	0.163445	3.60813	0.751654	0.999668
AlRepB-124	DNA	DNA	0.0878337	0.0878356	11.8344	0.67783	0.999668
AlRepB-126	hAT-Ac	DNA	0.133035	0.133046	9.91006	0.558369	0.999668
AlRepB-127	DNA	DNA	0.0770506	0.0770521	12.0768	0.717987	0.999668
AlRepB-128	Unknown	Unknown	0.182891	0.182901	10.6786	0.429301	0.999668
AlRepB-13	Ngaro	LTR	0.0935323	0.0935376	10.4973	0.667473	0.999668
AlRepB-136	Unknown	Unknown	0.0364278	0.0364319	9.41642	0.894896	0.999668
AlRepB-14	Rex-Babar	LINE	-0.00433926	-0.00434038	8.85048	0.98579	0.999668
AlRepB-148	Unknown	Unknown	0.179452	0.179475	9.30574	0.430344	0.999668
AlRepB-157	Satellite	Satellite	-1.01875	-1.02266	4.60387	0.104767	0.999668
AlRepB-160	L2	LINE	-0.277176	-0.277219	9.01758	0.266918	0.999668
AlRepB-161	RTE-BovB	LINE	0.00760666	0.0076069	11.1994	0.972507	0.999668
AlRepB-1625	Unknown	Unknown	0.114959	0.114986	8.39163	0.687951	0.999668
AlRepB-173	Retroposon	Retroposon	-0.0637685	-0.063772	10.5299	0.781356	0.999668
AlRepB-180	hAT-Ac	DNA	0.00767744	0.00767764	11.5592	0.971142	0.999668
AlRepB-185	DNA	DNA	0.0683779	0.0683812	10.7142	0.748334	0.999668
AlRepB-193	Penelope	LINE	0.0434963	0.0434972	12.0505	0.836854	0.999668
AlRepB-2	hAT-Ac	DNA	0.185025	0.185036	10.4405	0.377399	0.999668
AlRepB-200	Unknown	Unknown	0.0926698	0.0926744	10.6562	0.666211	0.999668
AlRepB-221	Unknown	Unknown	0.0219736	0.021975	10.3441	0.919352	0.999668
AlRepB-234	PiggyBac	DNA	0.0369306	0.0369329	10.3541	0.869643	0.999668
AlRepB-250	DNA	DNA	-0.0678317	-0.0678352	10.6187	0.751588	0.999668
AlRepB-26	L2	LINE	0.0259415	0.0259419	12.5753	0.903498	0.999668
AlRepB-269	Unknown	Unknown	-0.0138611	-0.0138621	10.3622	0.950358	0.999668
AlRepB-304	Unknown	Unknown	0.15686	0.156875	9.75852	0.484534	0.999668
AlRepB-351	TcMar-Tc1	DNA	0.0731608	0.0731629	11.4679	0.740245	0.999668
AlRepB-356	Unknown	Unknown	-0.276357	-0.276409	8.77547	0.285596	0.999668
AlRepB-365	Unknown	Unknown	0.31128	0.31133	8.98517	0.198868	0.999668
AlRepB-383	TcMar-Tc1	DNA	0.316498	0.316607	7.89343	0.25763	0.999668
AlRepB-392	hAT-Charlie	DNA	0.0982529	0.0982622	9.72246	0.687481	0.999668
AlRepB-420	Unknown	Unknown	0.176394	0.176397	12.279	0.392425	0.999668
AlRepB-429	hAT-Ac	DNA	-0.0431477	-0.0431536	9.26747	0.864912	0.999668
AlRepB-438	hAT-Charlie	DNA	0.122197	0.122199	12.0461	0.554208	0.999668
AlRepB-44	TcMar-Tc1	DNA	0.0634179	0.0634187	12.7134	0.764396	0.999668
AlRepB-45	SINE	SINE	-0.226499	-0.226534	9.01475	0.408148	0.999668
AlRepB-450	Unknown	Unknown	-0.853011	-0.855151	5.06021	0.090446	0.999668
AlRepB-473	hAT	DNA	0.171135	0.171145	10.3831	0.5175	0.999668
AlRepB-517	TcMar-Tc1	DNA	0.00520636	0.00520664	10.5994	0.98075	0.999668
AlRepB-569	Unknown	Unknown	0.0191675	0.019168	11.6491	0.929383	0.999668
AlRepB-59	hAT-Tip100	DNA	0.132674	0.132699	8.7592	0.748706	0.999668
AlRepB-60	DNA	DNA	0.13469	0.134695	11.1237	0.523973	0.999668
AlRepB-65	Unknown	Unknown	-0.0460288	-0.046031	10.6797	0.830926	0.999668
AlRepB-727	hAT-Ac	DNA	-0.0225496	-0.0225505	11.0202	0.91617	0.999668
AlRepB-731	TcMar-Tc2	DNA	0.0748158	0.0748179	11.4263	0.722393	0.999668
AlRepB-738	hAT-Ac	DNA	-0.0878759	-0.0878797	10.8498	0.678445	0.999668
AlRepB-767	Unknown	Unknown	-0.310431	-0.310497	8.57351	0.271414	0.999668
AlRepB-773	hAT-Charlie	DNA	-0.0380279	-0.0380329	9.24974	0.868305	0.999668
AlRepB-784	hAT-Ac	DNA	0.113647	0.11365	11.5016	0.599249	0.999668
AlRepB-923	hAT-Charlie	DNA	0.0388751	0.0388768	10.8369	0.856069	0.999668
AlRepB-964	hAT-Tip100	DNA	0.0836451	0.0836485	10.9369	0.704696	0.999668
AlRepB-99	hAT	DNA	0.00802731	0.00802758	11.2935	0.973834	0.999668
AlRepC-102	TcMar-Tc1	DNA	-0.246417	-0.246514	7.69904	0.361844	0.999668
AlRepC-1020	Unknown	Unknown	0.0996448	0.099676	8.05928	0.705578	0.999668
AlRepC-1023	DNA	DNA	0.023991	0.0239936	9.49182	0.927152	0.999668
AlRepC-1033	PIF-Harbinger	DNA	0.00327286	0.00327317	9.31976	0.989116	0.999668
AlRepC-1036	Unknown	Unknown	-0.153817	-0.153848	8.61786	0.582934	0.999668
AlRepC-1068	hAT-Tip100	DNA	-0.198285	-0.198552	5.95492	0.552519	0.999668
AlRepC-1083	hAT-Tip100	DNA	-0.0235671	-0.0235697	9.59695	0.920283	0.999668
AlRepC-1084	Rex-Babar	LINE	0.0698224	0.0698512	7.57463	0.795802	0.999668
AlRepC-1114	CMC-EnSpm	DNA	-0.0758677	-0.0758794	9.10021	0.788496	0.999668
AlRepC-1119	hAT-Charlie	DNA	-0.0207133	-0.0207151	9.77868	0.928662	0.999668
AlRepC-1121	Unknown	Unknown	0.128846	0.128874	8.51948	0.645076	0.999668
AlRepC-1154	RTE-BovB	LINE	0.108252	0.108257	10.6158	0.619932	0.999668
AlRepC-1169	CMC-EnSpm	DNA	0.643757	0.645743	4.82988	0.111925	0.999668
AlRepC-1227	Unknown	Unknown	0.0183555	0.0183557	13.1007	0.930969	0.999668
AlRepC-1250	Unknown	Unknown	-0.0941818	-0.0941942	9.28612	0.681806	0.999668
AlRepC-1255	PiggyBac	DNA	-0.113656	-0.113669	9.51432	0.621714	0.999668
AlRepC-1270	Unknown	Unknown	-0.433866	-0.434012	7.92186	0.117891	0.999668
AlRepC-128	hAT	DNA	0.0760943	0.0760962	11.6433	0.728881	0.999668
AlRepC-1280	PIF-Harbinger	DNA	0.407572	0.407756	7.50716	0.179728	0.999668
AlRepC-1282	hAT	DNA	-0.291101	-0.29125	7.35561	0.350142	0.999668
AlRepC-1285	Unknown	Unknown	0.176979	0.177032	8.06787	0.529239	0.999668
AlRepC-1286	hAT-Ac	DNA	0.298097	0.298143	9.05621	0.312924	0.999668
AlRepC-1293	Unknown	Unknown	-0.0887909	-0.088817	8.13014	0.743514	0.999668
AlRepC-1298	Unknown	Unknown	0.0405869	0.0405893	10.4161	0.871431	0.999668
AlRepC-13	Rex-Babar	LINE	-0.240212	-0.240227	10.3575	0.333405	0.999668
AlRepC-1303	Unknown	Unknown	0.0846601	0.0846822	8.21327	0.776656	0.999668
AlRepC-132	DNA	DNA	-0.175282	-0.175406	6.81122	0.564038	0.999668
AlRepC-1351	hAT-Ac	DNA	0.105369	0.105397	8.19388	0.738115	0.999668
AlRepC-136	hAT-Ac	DNA	0.0797522	0.0797679	8.68732	0.739556	0.999668
AlRepC-1388	Unknown	Unknown	-0.042914	-0.0429171	10.187	0.846298	0.999668
AlRepC-1390	Unknown	Unknown	0.127362	0.127394	8.26702	0.638171	0.999668
AlRepC-14	Unknown	Unknown	-0.00679453	-0.0067964	8.63975	0.978139	0.999668
AlRepC-1412	Unknown	Unknown	0.292529	0.292559	9.62804	0.224624	0.999668
AlRepC-143	Unknown	Unknown	0.0394009	0.0394025	10.9256	0.857575	0.999668
AlRepC-1432	Unknown	Unknown	-0.105316	-0.105367	7.44582	0.722898	0.999668
AlRepC-1433	hAT-Charlie	DNA	0.0794561	0.0794736	8.47742	0.761131	0.999668
AlRepC-144	Penelope	LINE	0.0686995	0.0687081	9.2937	0.796292	0.999668
AlRepC-146	hAT-Ac	DNA	-0.0709321	-0.0709455	8.69077	0.778169	0.999668
AlRepC-1508	hAT-Charlie	DNA	0.127342	0.127374	8.31596	0.638847	0.999668
[truncated: 1,046 more rows]

## Sheet: Muscle
Element	Family	Class	logFC.-1	unshrunk.logFC.1	logCPM.-1	PValue.1	FDR.-1
AlRepC-299	Unknown	Unknown	7.52284	7.55373	8.33257	1.20199e-10	2.62995e-07
AlRepB-358	hAT-Ac	DNA	3.18825	3.18878	11.8044	1.43267e-06	0.00156735
Mariner-1_SP	TcMar-Fot1	DNA	11.0098	1.44269e+08	5.20571	2.77958e-06	0.00202724
AlRepD-1119	L2	LINE	3.24489	3.25171	8.19661	0.000124143	0.067906
7SK	RNA	RNA	-2.1027	-2.13554	5.11327	0.293925	0.997806
7SLRNA	srpRNA	srpRNA	-0.339997	-0.340138	10.2098	0.817004	0.997806
Academ-1_CGi	Academ	DNA	0.490453	0.503467	4.80909	0.855238	0.997806
Academ-1_GA	Academ	DNA	0.268571	0.269234	7.72125	0.784516	0.997806
Academ-1_PM	Academ	DNA	-1.24554	-1.26623	5.02862	0.634328	0.997806
Academ-3_BF	Academ	DNA	0.325989	0.328821	5.58029	0.886695	0.997806
Academ-5_SK	Academ	DNA	3.60366	3.69479	5.1094	0.115047	0.997806
AGAM2	CR1	LINE	-3.16093	-3.23475	5.36551	0.216738	0.997806
Ag-Jock-1	Jockey	LINE	-0.155147	-0.15522	9.85471	0.829647	0.997806
AnolisSINE2c	tRNA-Sauria	SINE	-0.100759	-0.113522	5.98446	0.947792	0.997806
BARI_DM	TcMar-Tc1	DNA	1.22604	1.23042	7.64471	0.353816	0.997806
BEL-10_DEl-I	Pao	LTR	-2.59891	-2.65054	5.2153	0.15961	0.997806
BEL-10_GA-I	Pao	LTR	4.30676	4.54766	4.57693	0.112821	0.997806
BEL-10-I_NV	Pao	LTR	1.5883	1.85238	4.45666	0.61121	0.997806
BEL11-I_DR	Pao	LTR	2.93931	3.07924	4.28704	0.321154	0.997806
BEL-122_AA-I	Pao	LTR	1.56922	1.53854	4.76629	0.542289	0.997806
BEL-132_AA-I	Pao	LTR	-4.03199	-4.13375	5.238	0.0847814	0.997806
BEL-13_Adi-I	Pao	LTR	0.941042	0.948318	4.47875	0.734142	0.997806
BEL14-I_DR	Pao	LTR	-0.0927676	-0.339021	4.04942	0.925446	0.997806
BEL15-I_DR	Pao	LTR	-3.15931	-3.35363	4.49183	0.290987	0.997806
BEL-166_AA-I	Pao	LTR	3.7591	3.89569	4.56536	0.146098	0.997806
BEL-17_DEl-I	Pao	LTR	-1.83865	-1.8679	6.06214	0.246789	0.997806
BEL18-I_DR	Pao	LTR	0.37122	0.383395	4.70785	0.887026	0.997806
BEL-192_AA-I	Pao	LTR	0.470366	0.472929	6.18883	0.74534	0.997806
BEL-1_DAn-I	Pao	LTR	-0.796257	-0.806911	5.71005	0.646082	0.997806
BEL-1_DBp-I	Pao	LTR	5.97116	6.46914	4.31347	0.0414232	0.997806
BEL-1_DWil-I	Pao	LTR	2.05023	2.07285	4.8527	0.409459	0.997806
BEL-1_GA-I	Pao	LTR	-1.9513	-1.96865	6.37499	0.129557	0.997806
BEL1-I_SM	Pao	LTR	-2.42781	-2.42796	13.1237	0.00327941	0.997806
BEL-1-LTR_NVi	Pao	LTR	-0.477297	-0.49077	5.6185	0.824511	0.997806
BEL-1_PBa-I	LTR	LTR	-0.884188	-0.891207	6.352	0.481516	0.997806
BEL-20_AA-I	Pao	LTR	-0.360918	-0.360994	11.2209	0.6352	0.997806
BEL-228_AA-I	Pao	LTR	1.33512	1.40585	4.65657	0.628033	0.997806
BEL-22_DAn-I	Pao	LTR	-1.53031	-1.53235	8.37005	0.132695	0.997806
BEL-236_AA-I	Pao	LTR	-2.7516	-2.82317	5.10786	0.298095	0.997806
BEL-26_CQ-I	Pao	LTR	1.82527	1.87558	4.75776	0.4796	0.997806
BEL-2_GA-I	Pao	LTR	2.53128	2.57562	4.9213	0.375381	0.997806
BEL2-I_SP	Pao	LTR	1.30932	1.47145	4.63511	0.564022	0.997806
BEL-30_CQ-LTR	Pao	LTR	-0.272305	-0.277552	5.04583	0.884371	0.997806
BEL30-I_DR	Pao	LTR	1.50578	1.51222	7.04581	0.353404	0.997806
BEL-31_AA-I	Pao	LTR	-5.91914	-1.44269e+08	4.24679	0.0722158	0.997806
BEL31-LTR_DR	Pao	LTR	0.431032	0.4411	5.06467	0.881565	0.997806
BEL32-I_DR	Pao	LTR	1.56718	1.57663	6.31728	0.337788	0.997806
BEL-39_DRe-I	Pao	LTR	0.35211	0.356918	5.88017	0.845698	0.997806
BEL-41_DRe-I	Pao	LTR	-1.3512	-1.37491	5.57864	0.448431	0.997806
BEL-46_AA-I	Pao	LTR	0.224463	0.224499	11.7382	0.850209	0.997806
BEL-48_AA-I	Pao	LTR	-1.01814	-1.02135	7.29988	0.369145	0.997806
BEL-4_DWil-I	Pao	LTR	-0.791283	-0.796468	6.22492	0.624821	0.997806
BEL4-I_AG	Pao	LTR	1.01676	1.05382	4.71801	0.646374	0.997806
BEL-4-I_XT	Pao	LTR	0.18121	0.154587	4.75068	0.953116	0.997806
BEL-50_DRe-I	Pao	LTR	0.744729	0.784205	5.32971	0.762276	0.997806
BEL-51_DRe-I	Pao	LTR	-1.91732	-1.93248	6.14407	0.249292	0.997806
BEL-57_CQ-I	Pao	LTR	-0.295425	-0.297392	7.81105	0.750639	0.997806
BEL-59_DRe-I	Pao	LTR	0.538334	0.566788	4.71885	0.815474	0.997806
BEL5-I_DR	Pao	LTR	-0.555805	-0.558196	4.80893	0.81198	0.997806
BEL-610_AA-I	Pao	LTR	0.635126	0.635602	9.38452	0.420608	0.997806
BEL-61_DRe-I	Pao	LTR	0.215184	0.215939	6.93884	0.872894	0.997806
BEL-645_AA-I	Pao	LTR	1.90211	1.96239	4.74461	0.442782	0.997806
BEL-6_GA-I	Pao	LTR	1.56759	1.54476	4.6076	0.592835	0.997806
BEL-71_AA-I	Pao	LTR	-2.30444	-2.42232	4.65902	0.366063	0.997806
BEL-7_AA-I	Pao	LTR	1.39542	1.50956	4.50476	0.663579	0.997806
BEL-7_GA-I	Pao	LTR	4.25701	4.37765	5.61542	0.0311356	0.997806
BEL-7_GA-LTR	Pao	LTR	-4.62024	-5.05676	4.47714	0.0952336	0.997806
BEL-8_DMo-I	Pao	LTR	-2.70288	-2.84024	5.21141	0.298324	0.997806
BEL8-I_DR	Pao	LTR	-0.583401	-0.586133	7.63602	0.552228	0.997806
BEL-9_DWil-I	Pao	LTR	-0.896248	-0.928143	4.76585	0.755198	0.997806
BovB_PMo	RTE-BovB	LINE	5.32597	1.44269e+08	3.84848	0.121169	0.997806
Bridge1_FR	Penelope	LINE	-3.45998	-3.58495	4.71498	0.190947	0.997806
Bridge1_TN	Penelope	LINE	0.0155612	0.0155675	9.88173	0.980397	0.997806
Bridge2_Xena_	Penelope	LINE	-1.11434	-1.14739	4.85612	0.591021	0.997806
BtERVF1_I-int	ERV1	LTR	-5.44672	-1.44269e+08	4.42406	0.0297467	0.997806
CarERV2-int	ERV1	LTR	-2.19365	-2.20802	6.42339	0.164914	0.997806
CASAT_HD	Satellite	Satellite	-0.0630186	-0.0633517	7.12152	0.951002	0.997806
CATCH2LTR_DR	Pao	LTR	0.283529	0.283781	9.16981	0.731285	0.997806
CER2-1-LTR_CE	Pao	LTR	-0.168708	-0.169605	7.02713	0.893211	0.997806
Chapaev-10_HM	CMC-Chapaev	DNA	-1.68266	-1.70429	5.83299	0.355374	0.997806
Chapaev-1_AA	CMC-Chapaev	DNA	0.930028	0.957867	4.80079	0.710575	0.997806
Chapaev3-1_AC	CMC-Chapaev-3	DNA	-2.07447	-2.10325	4.75163	0.49011	0.997806
Chapaev3-1_HR	CMC-Chapaev-3	DNA	-0.845022	-0.871465	4.77384	0.671565	0.997806
Chapaev3-2_PM	CMC-Chapaev-3	DNA	-0.989923	-1.00026	5.69234	0.569839	0.997806
Chapaev3-4_HM	CMC-Chapaev-3	DNA	2.99084	3.10133	4.94074	0.192687	0.997806
Chapaev-3_ACa	CMC-Chapaev	DNA	1.67627	1.80618	3.951	0.620433	0.997806
Chapaev-3_NV	CMC-Chapaev	DNA	0.544636	0.551576	5.51971	0.815488	0.997806
Chapaev-6_HM	CMC-Chapaev	DNA	-2.02308	-2.38888	4.25074	0.513115	0.997806
Chapaev-8_HM	CMC-Chapaev	DNA	1.83687	1.84762	6.60791	0.172989	0.997806
Chaplin1_DR	hAT-Charlie	DNA	3.12628	3.149	6.45098	0.0436124	0.997806
Chaplin4_FR	hAT-Charlie	DNA	-1.38444	-1.39128	6.7047	0.245655	0.997806
Chaplin8_FR	hAT-Charlie	DNA	-0.354187	-0.355396	6.93644	0.769354	0.997806
Charlie3_Xt	hAT-Charlie	DNA	0.914632	0.907548	5.14136	0.673566	0.997806
Chompy-4_Crp	PIF-Harbinger	DNA	-0.861913	-0.884666	5.65826	0.627955	0.997806
Copia-11H_DR-LTR	Gypsy	LTR	-0.738149	-0.759122	4.7842	0.740406	0.997806
Copia11-NVi_I-int	Copia	LTR	4.22092	4.43386	5.32453	0.0306475	0.997806
Copia-132_AA-I	Copia	LTR	-2.2857	-2.36028	4.89652	0.29403	0.997806
Copia-17_CQ-I	Copia	LTR	-0.975938	-0.984417	6.69325	0.487347	0.997806
Copia-18_SI-I	Copia	LTR	1.56649	1.7216	4.49113	0.60832	0.997806
Copia-1_AC-I	Copia	LTR	-1.14139	-1.1422	8.18028	0.449824	0.997806
Copia1-I_DR	Copia	LTR	0.742842	0.746593	6.57538	0.569969	0.997806
Copia-1-I_HS	Copia	LTR	-1.68251	-1.69631	6.02014	0.276385	0.997806
Copia-27_DPu-I	Copia	LTR	-0.113598	-0.115424	5.85219	0.951927	0.997806
Copia-3_DWil-I	Copia	LTR	1.41735	1.50582	4.19857	0.574928	0.997806
Copia-3_GA-I	Copia	LTR	-3.67892	-3.73866	5.61162	0.0431477	0.997806
Copia3-I_DR	Copia	LTR	-0.590521	-0.591216	8.7167	0.516613	0.997806
Copia3-I_XT	Copia	LTR	0.294747	0.262537	5.27834	0.893519	0.997806
Copia5-I_DR	Copia	LTR	-1.51416	-1.52516	6.58498	0.332946	0.997806
Copia-7_Ano-I	Copia	LTR	-0.960075	-0.971608	6.35259	0.602088	0.997806
Copia-7-I_DR	Gypsy	LTR	-4.49079	-4.62273	5.09669	0.0173873	0.997806
Copia-9_Ano-I	Copia	LTR	0.167781	0.16817	7.70827	0.866964	0.997806
CR1-10_NV	Rex-Babar	LINE	-2.85759	-2.95802	4.85872	0.266836	0.997806
CR1-12_DR	L2	LINE	2.50132	2.51995	6.33463	0.106728	0.997806
CR1-1_AG	L2	LINE	0.591065	0.604568	5.25764	0.820467	0.997806
CR1-1_CPB	CR1	LINE	1.83499	1.83573	10.273	0.0192039	0.997806
CR1-1_IS	CR1	LINE	1.74811	1.77186	5.41601	0.427976	0.997806
CR1-22_DR	L2	LINE	-0.891115	-0.895418	7.03793	0.399415	0.997806
CR1-24_DR	L2	LINE	-0.161329	-0.16076	6.80692	0.919709	0.997806
CR1-28_BF	CR1-Zenon	LINE	-0.529327	-0.547605	6.07282	0.78337	0.997806
CR1-29_BF	CR1-Zenon	LINE	-0.148997	-0.150255	4.51875	0.950236	0.997806
CR1-2_CQ	CR1	LINE	0.59534	0.609138	5.11735	0.770442	0.997806
CR1-2_DAn	CR1	LINE	4.40917	4.48537	5.56186	0.0564827	0.997806
CR1-2_FR	Rex-Babar	LINE	-0.433573	-0.433954	9.11253	0.55893	0.997806
CR1-2_IS	CR1	LINE	4.08949	4.18798	5.13115	0.0269463	0.997806
CR1-2_LCh	LINE	LINE	-0.663407	-0.673406	5.17411	0.742268	0.997806
CR1-35_HM	L2	LINE	-2.52998	-2.98428	4.70121	0.372482	0.997806
CR1-37_DR	L2	LINE	0.832012	0.835201	6.83146	0.453458	0.997806
CR1-3c_LCh	LINE	LINE	-1.45083	-1.46762	5.59428	0.435559	0.997806
CR1-3_FR	Rex-Babar	LINE	-0.690126	-0.691232	8.38352	0.403049	0.997806
CR1-44_DR	L2	LINE	1.97196	2.01895	5.40783	0.47386	0.997806
CR1-49_DR	L2	LINE	-6.27722	-1.44269e+08	3.91803	0.0328875	0.997806
CR1-53_BF	CR1-Zenon	LINE	-2.05576	-2.15354	4.71104	0.439562	0.997806
CR1-55_AAe	CR1	LINE	0.168434	0.168652	8.18104	0.870328	0.997806
CR1-61_HM	L2	LINE	-6.583	-1.44269e+08	6.09799	0.0182459	0.997806
CR1-66_HM	L2	LINE	1.70404	1.74654	4.96046	0.429575	0.997806
CR1-69_HM	CR1	LINE	0.618295	0.62891	5.29898	0.771722	0.997806
CR1-79_HM	L2	LINE	-0.156616	-0.158398	5.95835	0.927732	0.997806
CR1-89_HM	CR1	LINE	-1.00044	-1.00331	7.39203	0.369361	0.997806
CR1-8_SP	L2	LINE	-0.69394	-0.696027	7.34265	0.525749	0.997806
CR1-E	CR1	LINE	-6.23614	-6.5	7.37853	0.0048508	0.997806
CR1_Ele24	CR1	LINE	-0.923406	-0.931813	6.52174	0.546534	0.997806
Crack-1_PM	L2	LINE	-1.05268	-1.08578	4.88064	0.601685	0.997806
Crack-26_AAe	L2	LINE	2.77062	2.82289	5.4068	0.243906	0.997806
Crack-28_AAe	L2	LINE	0.413228	0.418978	4.87908	0.871119	0.997806
Crack-28_BF	L2	LINE	-0.288179	-0.288545	8.36126	0.800572	0.997806
Crack-3_DR	L2	LINE	0.159298	0.159551	7.85376	0.865763	0.997806
Crypton-6N1_CGi	Crypton	DNA	0.28956	0.289678	10.1401	0.679308	0.997806
CryptonV-1_DR	Crypton-V	DNA	0.0768809	0.0767998	8.67698	0.915711	0.997806
CryptonV-2_DR	Crypton-V	DNA	1.44312	1.44857	7.07827	0.163568	0.997806
CryptonV-3_DR	Crypton-V	DNA	0.595515	0.596141	9.19812	0.397638	0.997806
CSINE3A	tRNA-C	SINE	-2.53633	-2.69244	4.39735	0.409409	0.997806
Dada-1_BF	Dada	DNA	-0.94449	-0.966752	5.41633	0.618724	0.997806
Dada-1_NV	Dada	DNA	4.3022	4.51753	4.92513	0.0412095	0.997806
Dada-1_ON	Dada	DNA	1.27005	1.32621	4.39843	0.639338	0.997806
Dada-tL_DR	Dada	DNA	-0.811362	-0.812805	8.19153	0.385275	0.997806
Dada-U1B_DR	Dada	DNA	-0.0342834	-0.0342492	7.27745	0.978233	0.997806
Dada-U6_DR	Dada	DNA	-1.50856	-1.54319	5.05158	0.595715	0.997806
Dada-U6_GA	Dada	DNA	-0.444738	-0.444737	4.79653	0.826208	0.997806
Dada-U6_OL	Dada	DNA	0.722766	0.709502	4.85824	0.784512	0.997806
Dada-U6_SS	Dada	DNA	0.431364	0.437142	5.70334	0.800999	0.997806
Daphne-14_NV	L2	LINE	2.9866	3.34571	4.25026	0.255965	0.997806
Daphne-18_HM	L2	LINE	0.0690764	0.0691051	7.64164	0.946132	0.997806
Daphne-21_SPu	L2	LINE	1.05212	1.058	6.07329	0.493202	0.997806
Daphne-27_DRe	L2	LINE	1.15654	1.15732	9.55813	0.0984012	0.997806
Daphne-38_HMa	L2	LINE	0.852464	0.869327	5.98408	0.518004	0.997806
Daphne-73_HMa	L2	LINE	-0.643638	-0.645213	7.68429	0.606782	0.997806
DIRS-12_ACar	DIRS	LTR	-5.5301	-1.44269e+08	4.63666	0.068298	0.997806
DIRS-12_DR	DIRS	LTR	-3.51225	-3.58629	5.20861	0.117328	0.997806
DIRS-13B_XT	DIRS	LTR	-0.39213	-0.39197	9.174	0.840983	0.997806
DIRS-13C_XT	DIRS	LTR	0.38052	0.388971	5.32088	0.844776	0.997806
DIRS-13_DR	DIRS	LTR	0.37928	0.379866	8.19932	0.698174	0.997806
DIRS-15B_DR	Ngaro	LTR	-0.0136488	-0.0138137	8.2973	0.98857	0.997806
DIRS-15_DR	Ngaro	LTR	1.49304	1.50592	6.01613	0.392073	0.997806
DIRS-1E-LTR_DR	Ngaro	LTR	-0.788614	-0.791706	7.07052	0.544424	0.997806
DIRS-1F-LTR_DR	Ngaro	LTR	2.45806	2.52456	4.91638	0.273628	0.997806
DIRS1_FR	DIRS	LTR	-2.07629	-2.08823	6.69295	0.221763	0.997806
DIRS-1-LTR_DR	Ngaro	LTR	-1.96632	-1.98923	5.70957	0.335672	0.997806
DIRS-22_ACar	DIRS	LTR	-2.0044	-2.04318	5.40933	0.214383	0.997806
DIRS-3_DR	DIRS	LTR	0.719325	0.722992	7.07363	0.593639	0.997806
DIRS-4_DR	Ngaro	LTR	0.766275	0.774501	5.88017	0.691208	0.997806
DIRS-4N3_DR	Ngaro	LTR	-1.03195	-1.04988	5.87271	0.611244	0.997806
DIRS-52_XT	DIRS	LTR	1.87957	1.94133	5.34267	0.246427	0.997806
DIRS-8B_DR	Ngaro	LTR	1.22175	1.23357	6.1686	0.337411	0.997806
DIRS-8_DR	Ngaro	LTR	1.64728	1.65552	6.67011	0.145487	0.997806
DIRS-9_CPB	DIRS	LTR	-2.36374	-2.37392	7.10402	0.0978822	0.997806
DIRS-N4_DR	Ngaro	LTR	-3.34418	-3.42243	5.38226	0.106432	0.997806
DNA-1-2_DR	DNA	DNA	-1.22079	-1.25994	4.31946	0.613941	0.997806
DNA-1-7_DR	PIF-Harbinger	DNA	-0.149554	-0.151513	5.35387	0.937677	0.997806
DNA-1-8_DR	DNA	DNA	-0.732263	-0.733367	8.5571	0.44144	0.997806
DNA1c_Lch	DNA	DNA	3.00204	3.12521	4.63244	0.277068	0.997806
DNA-1_Gav	DNA	DNA	0.536515	0.539424	6.48376	0.722495	0.997806
DNA2-10_CGi	DNA	DNA	1.6968	1.72362	5.49868	0.415555	0.997806
DNA2-10_DR	DNA	DNA	0.0501484	0.0508853	5.74707	0.973491	0.997806
DNA-2-12_DR	CMC-EnSpm	DNA	0.289841	0.302707	5.58495	0.858345	0.997806
DNA-2-14_DR	CMC-EnSpm	DNA	1.3686	1.39809	4.62747	0.65285	0.997806
DNA-2-15_DR	DNA	DNA	0.172871	0.179648	5.03458	0.930129	0.997806
DNA2-16_DR	DNA	DNA	0.259375	0.259536	9.38106	0.706743	0.997806
DNA-2-18_DR	CMC-EnSpm	DNA	1.83027	1.83736	7.19192	0.138772	0.997806
DNA-2-1_DR	CMC-EnSpm	DNA	2.14535	2.18779	5.1467	0.282895	0.997806
DNA2-1_DR	CMC-EnSpm	DNA	1.94837	2.03824	4.42547	0.559073	0.997806
DNA-2-20_DR	CMC-EnSpm	DNA	-0.0210486	-0.0212248	6.50106	0.988451	0.997806
DNA-2-24B_DR	DNA	DNA	-0.781791	-0.787572	5.65573	0.6852	0.997806
DNA-2-27_DR	DNA	DNA	0.311794	0.312517	7.73713	0.763239	0.997806
DNA-2-31_DR	TcMar-ISRm11	DNA	4.01349	4.16494	4.80234	0.130641	0.997806
DNA-2-3_DR	TcMar-ISRm11	DNA	-3.17996	-3.38638	4.19142	0.287482	0.997806
DNA2-3_DR	hAT	DNA	2.33537	2.34132	7.67049	0.0615785	0.997806
DNA2-5_DR	hAT-Ac	DNA	1.22833	1.23024	8.23861	0.193586	0.997806
DNA2-5_TCa	DNA	DNA	-0.868821	-0.899681	4.27692	0.757954	0.997806
DNA2-7_CGi	DNA	DNA	1.90416	1.92008	6.00517	0.243776	0.997806
DNA2-7_DR	DNA	DNA	0.130021	0.131368	5.89797	0.933181	0.997806
DNA2c_Lch	DNA	DNA	-0.838169	-0.842507	6.20418	0.520853	0.997806
DNA3-10_CGi	DNA	DNA	0.0956402	0.0990731	6.52482	0.955919	0.997806
DNA-3-10_NV	DNA	DNA	2.02126	2.15207	5.18048	0.401448	0.997806
DNA4-24_CGi	DNA	DNA	-0.423901	-0.426108	6.94089	0.678887	0.997806
DNA-4-3_DR	DNA	DNA	-1.12039	-1.12552	6.936	0.353578	0.997806
DNA-4-5_DR	DNA	DNA	1.12983	1.13372	5.55788	0.518854	0.997806
DNA-5-4_DR	DNA	DNA	1.58406	1.61945	4.9191	0.48497	0.997806
DNA5_Lch	DNA	DNA	-1.40522	-1.42919	5.65037	0.525342	0.997806
DNA6-10_DR	DNA	DNA	0.721413	0.735056	5.25398	0.74194	0.997806
DNA6-1B_DR	hAT-hAT5	DNA	0.879948	0.922325	4.42791	0.779401	0.997806
DNA6-1_DR	hAT-hAT5	DNA	-2.52944	-2.63863	4.64398	0.328102	0.997806
DNA6-2_DR	DNA	DNA	1.2929	1.30448	5.86828	0.476307	0.997806
DNA6-4_DR	DNA	DNA	2.79107	2.80654	6.81684	0.0386048	0.997806
DNA6-6_DR	DNA	DNA	0.0394678	0.0395505	8.86708	0.955395	0.997806
DNA-6-N5_DR	DNA	DNA	0.453726	0.457361	5.9856	0.801435	0.997806
DNA-6-N7_DR	TcMar	DNA	0.658939	0.692964	4.69026	0.777885	0.997806
DNA-6-N9_DR	DNA	DNA	-4.02195	-4.06184	6.28354	0.102929	0.997806
DNA7_Lch	DNA	DNA	2.7222	2.80127	5.12399	0.277091	0.997806
DNA7-N1_DR	DNA	DNA	-1.46053	-1.46354	7.91622	0.130224	0.997806
DNA7-N2_DR	hAT-hAT6	DNA	1.37912	1.39794	4.88456	0.596057	0.997806
DNA8-10_DR	hAT-Ac	DNA	1.4541	1.45919	7.23884	0.256471	0.997806
DNA-8-13_DR	hAT	DNA	-0.111705	-0.111856	7.68263	0.933697	0.997806
DNA8-14_DR	DNA	DNA	-0.235098	-0.235984	6.04335	0.902477	0.997806
DNA8-15_CQ	DNA	DNA	4.76713	4.89212	5.59007	0.0160036	0.997806
DNA8-17_DR	DNA	DNA	3.89074	3.92471	6.54644	0.0122693	0.997806
DNA-8-18_DR	hAT	DNA	-0.720127	-0.720519	9.48985	0.354534	0.997806
DNA8-21_DR	Merlin	DNA	0.552147	0.554848	6.73908	0.651922	0.997806
DNA-8-22_DR	hAT	DNA	2.22399	2.27956	4.99555	0.267048	0.997806
DNA8-23_DR	DNA	DNA	-2.56971	-2.59001	6.39501	0.180561	0.997806
DNA-8-25_DR	hAT-Ac	DNA	-0.514324	-0.515941	7.43036	0.612843	0.997806
DNA8-25_DR	DNA	DNA	0.847699	0.851307	6.93442	0.553421	0.997806
DNA8-26_DR	DNA	DNA	0.535425	0.535743	9.60926	0.44538	0.997806
DNA-8-27_DR	hAT-Ac	DNA	0.556693	0.587744	4.32153	0.817267	0.997806
DNA8-2_DR	hAT-Tip100	DNA	-1.07934	-1.08959	5.8481	0.539435	0.997806
DNA8-39_AP	DNA	DNA	-2.41947	-2.85445	4.29453	0.408439	0.997806
DNA-8-3_DR	DNA	DNA	-0.272646	-0.274599	7.5849	0.791863	0.997806
DNA-8-3_HM	DNA	DNA	1.4703	1.4712	9.4976	0.153012	0.997806
DNA8-4A_DR	hAT-Charlie	DNA	-2.09477	-2.10544	6.85471	0.130065	0.997806
DNA-8-5_DR	hAT	DNA	-0.18264	-0.182998	8.19499	0.809634	0.997806
DNA8-7_CQ	DNA	DNA	2.71991	2.88904	4.99943	0.295014	0.997806
DNA-8-7_DR	hAT	DNA	0.919091	0.919155	12.758	0.114457	0.997806
DNA-8-9_DR	hAT-Ac	DNA	1.03854	1.05898	5.75605	0.579791	0.997806
DNA9-2_AAe	MULE-MuDR	DNA	-2.20177	-2.2199	6.11801	0.268673	0.997806
DNA9-3_DR	DNA	DNA	-0.363492	-0.363626	10.4257	0.557732	0.997806
DNA9-5_DR	DNA	DNA	-1.58524	-1.58632	9.4871	0.103051	0.997806
DNA9TA1_DR	CMC-EnSpm	DNA	-0.174963	-0.17504	9.77864	0.822534	0.997806
DNA-N4_DR	DNA	DNA	0.0981372	0.0980532	9.66236	0.8992	0.997806
DNA-TA-5_DR	TcMar-Tigger	DNA	0.282162	0.282633	8.08499	0.738085	0.997806
DNA-TA-7_CQ	DNA	DNA	1.00772	1.02152	5.68475	0.634034	0.997806
DNA-TTAA0-1_DR	DNA	DNA	0.703685	0.69012	5.39302	0.731271	0.997806
DNA-TTAA0-3_DR	DNA	DNA	5.74227	5.92186	5.22835	0.0731474	0.997806
DNA-X-12_DR	DNA	DNA	-0.620912	-0.621175	10.0342	0.333471	0.997806
DNA-X-16_DR	DNA	DNA	-0.499261	-0.500377	8.043	0.535786	0.997806
DNAX-23_DR	DNA	DNA	2.81685	2.84896	5.78214	0.134993	0.997806
DNAX-24B_DR	DNA	DNA	1.05575	1.06105	5.1862	0.674428	0.997806
DNAX-25_DR	Zisupton	DNA	1.22484	1.26098	4.94357	0.65584	0.997806
Dong2_FR	Dong-R4	LINE	0.174394	0.174441	11.1056	0.752116	0.997806
Dong_FR	Dong-R4	LINE	0.512397	0.512546	11.0714	0.374492	0.997806
EnSpm-10_DR	CMC-EnSpm	DNA	2.21376	2.24445	6.04189	0.260038	0.997806
EnSpm-10_HM	CMC-EnSpm	DNA	-1.42902	-1.45214	5.43924	0.453829	0.997806
EnSpm-10N1_DR	CMC-EnSpm	DNA	-0.904549	-0.905136	9.16998	0.415158	0.997806
EnSpm-11_DR	CMC-EnSpm	DNA	-2.76248	-2.79562	6.03908	0.0559906	0.997806
EnSpm-14_DR	CMC-EnSpm	DNA	2.58232	2.59248	7.2004	0.0340021	0.997806
EnSpm-14N1_DR	CMC-EnSpm	DNA	0.899417	0.980719	4.20165	0.732593	0.997806
EnSpm-15_DR	CMC-EnSpm	DNA	-0.17288	-0.173365	7.85566	0.846818	0.997806
EnSpm-16_DR	CMC-EnSpm	DNA	2.14879	2.15448	7.60742	0.0592054	0.997806
EnSpm-17_HM	CMC-EnSpm	DNA	-0.602219	-0.604339	7.55971	0.56444	0.997806
EnSpm-18_DR	CMC-EnSpm	DNA	-0.619445	-0.666453	4.87294	0.806064	0.997806
EnSpm-1_HM	CMC-EnSpm	DNA	1.92529	1.97409	4.9022	0.460499	0.997806
EnSpm-1_NV	CMC-EnSpm	DNA	-1.45716	-1.50482	5.08553	0.585999	0.997806
EnSpm-1_PM	CMC-EnSpm	DNA	0.887044	0.888515	8.20476	0.325768	0.997806
EnSpm-21_HMa	CMC-EnSpm	DNA	-1.03209	-1.05154	5.5605	0.55687	0.997806
EnSpm-22_HMa	CMC-EnSpm	DNA	-0.502629	-0.501178	6.39407	0.698209	0.997806
EnSpm-2_DR	CMC-EnSpm	DNA	-0.0282277	-0.0284176	6.37761	0.988724	0.997806
EnSpm-2_HM	CMC-EnSpm	DNA	-0.15246	-0.158696	5.48765	0.931932	0.997806
EnSpm-3_DR	CMC-EnSpm	DNA	0.532943	0.544655	5.69919	0.772106	0.997806
EnSpm-4_DR	CMC-EnSpm	DNA	2.62181	2.69501	5.24011	0.216262	0.997806
EnSpm-4_HM	CMC-EnSpm	DNA	-1.03859	-1.04024	8.12625	0.320511	0.997806
EnSpm-5_DR	CMC-EnSpm	DNA	0.39467	0.394936	9.58442	0.54934	0.997806
EnSpm-5_HM	CMC-EnSpm	DNA	0.418468	0.418479	14.0273	0.451159	0.997806
ENSPM-6_DR	CMC-EnSpm	DNA	-0.0750384	-0.0750631	9.54928	0.910242	0.997806
EnSpm-6N1_DR	CMC-EnSpm	DNA	-0.729118	-0.732108	6.76865	0.545489	0.997806
EnSpm-7_DR	CMC-EnSpm	DNA	-0.21687	-0.217056	9.11569	0.76318	0.997806
EnSpm-7_HM	CMC-EnSpm	DNA	0.651601	0.675163	4.47617	0.847709	0.997806
EnSpm-8_DR	CMC-EnSpm	DNA	0.281373	0.295819	4.74819	0.889287	0.997806
EnSpm-9_DR	CMC-EnSpm	DNA	0.0991459	0.0991752	10.2593	0.871289	0.997806
EnSpm-N10_DR	CMC-EnSpm	DNA	-0.206595	-0.207142	7.5703	0.832565	0.997806
EnSpm-N11_DR	CMC-EnSpm	DNA	0.111613	0.113922	7.01089	0.940139	0.997806
EnSpm-N13_DR	CMC-EnSpm	DNA	-0.0202216	-0.0202521	8.39399	0.980321	0.997806
EnSpm-N14_DR	CMC-EnSpm	DNA	-0.162637	-0.162808	8.91205	0.87867	0.997806
EnSpm-N17_DR	TcMar	DNA	0.886421	0.891162	6.88508	0.516994	0.997806
EnSpm-N20_DR	CMC-EnSpm	DNA	3.31496	3.44081	4.67898	0.200758	0.997806
EnSpm-N2_DR	CMC-EnSpm	DNA	-0.0155379	-0.0332364	5.24544	0.988758	0.997806
EnSpm-N8_DR	CMC-EnSpm	DNA	-0.234449	-0.256768	4.71574	0.941329	0.997806
ERV1-1B_CPB-I	ERV1	LTR	0.205418	0.258676	4.7333	0.9192	0.997806
ERV1-1-I_DR	ERV1	LTR	-0.062172	-0.0632497	6.9629	0.96596	0.997806
ERV1-1-I_Lch	LTR	LTR	-0.41872	-0.423817	5.81103	0.788451	0.997806
ERV1-1_OPr-I	ERV1	LTR	0.827034	0.82901	7.65636	0.371945	0.997806
ERV1-1_SSc-I	ERV1	LTR	-0.430126	-0.432484	7.17947	0.714374	0.997806
ERV1-1_TSy-I	ERV1	LTR	-1.68961	-1.71806	5.70099	0.359166	0.997806
ERV1-2_Gav-I	ERV1	LTR	0.903547	0.910074	6.1615	0.464066	0.997806
ERV1-2-I_Lch	LTR	LTR	-2.39792	-2.45548	4.5659	0.315308	0.997806
ERV1-2_SSc-I	ERV1	LTR	-0.507419	-0.510827	6.44242	0.718978	0.997806
ERV1-3-I_DR	ERV1	LTR	-0.370121	-0.372333	6.73304	0.832863	0.997806
ERV13_MD_I-int	ERV1	LTR	1.22967	1.26366	4.49095	0.690741	0.997806
ERV1-3N-EC_I-int	ERV1	LTR	2.7204	2.79053	4.87462	0.346508	0.997806
ERV1-7_DR-I	ERV1	LTR	-0.344582	-0.353541	5.12334	0.863911	0.997806
ERV1-9N-I_ML	ERV1	LTR	1.22903	1.23139	8.36747	0.346766	0.997806
ERV-1_CPB-LTR	ERV1	LTR	1.24843	1.24975	8.73763	0.164633	0.997806
ERV1-N3-I_DR	ERV	LTR	0.940104	0.941179	8.68777	0.250991	0.997806
ERV1-N6-I_DR	ERV1	LTR	-0.244706	-0.242338	5.92645	0.885426	0.997806
ERV1-N7-I_DR	ERV1	LTR	-5.77538	-5.92579	5.45047	0.00808404	0.997806
ERV2-1_TSy-I	ERVK	LTR	5.7447	5.93231	5.01225	0.022477	0.997806
ERV2-3_FC-I	ERVK	LTR	0.461055	0.464465	5.70727	0.822232	0.997806
ERV23_MD_I-int	ERVK	LTR	0.312975	0.315259	6.75507	0.851191	0.997806
ERV2-3_Tbel_I-int	ERVK	LTR	1.98595	2.01309	6.12809	0.343878	0.997806
ERV2B-CPo_I-int	ERVK	LTR	-0.466197	-0.467597	7.07614	0.705024	0.997806
ERV-2B_Crp-LTR	ERV1	LTR	-0.163774	-0.163792	12.0686	0.79708	0.997806
ERV-2_CPB-I	ERV1	LTR	4.09643	4.23198	4.87476	0.114356	0.997806
ERV2N1-Mim_I-int	ERVK	LTR	1.49546	1.50625	6.32772	0.469177	0.997806
ERV3-1_ET-I	ERVL	LTR	-0.452217	-0.470453	4.63226	0.854913	0.997806
ERV3-1-I_XT	ERVL	LTR	-0.836177	-1.03596	5.27768	0.705386	0.997806
ERV38_MD-int	ERV1	LTR	0.272665	0.274706	6.07754	0.851235	0.997806
ERV-3_AMi-LTR	ERV1	LTR	-2.26923	-2.68373	4.12406	0.45986	0.997806
ERV40_MD_I-int	ERV1	LTR	-2.00406	-2.04149	5.4455	0.300354	0.997806
ERV43_MD_I-int	ERVK	LTR	2.72815	2.86626	4.89143	0.235125	0.997806
ERV4_DR-I	ERV1	LTR	0.0620613	0.0657447	6.7562	0.962807	0.997806
ERV6B-MD_I-int	ERV1	LTR	-1.22987	-1.23323	7.74354	0.231687	0.997806
ERV8N_MD_I-int	ERV1	LTR	-0.31521	-0.315697	7.73944	0.777404	0.997806
Expander	RTE	LINE	0.0545163	0.0545403	9.77992	0.933612	0.997806
EXPANDER1_DR	RTE	LINE	-0.678783	-0.679606	8.63807	0.417562	0.997806
Expander2	RTE	LINE	-1.64368	-1.64736	7.97326	0.102927	0.997806
FUGUREP1	Unknown	Unknown	-1.12913	-1.13317	5.1174	0.534525	0.997806
FUGUREP2	Unknown	Unknown	0.523021	0.523124	11.286	0.408971	0.997806
Furousha2	hAT-Ac	DNA	-0.537285	-0.547281	5.85102	0.73356	0.997806
Galileo_DW	P	DNA	-0.768493	-0.778217	5.52321	0.723885	0.997806
GibRV1	ERVK	LTR	0.484006	0.510419	4.92362	0.86905	0.997806
Ginger1-11_HM	Ginger	DNA	1.77942	1.79377	5.80772	0.37539	0.997806
Ginger1-1_AC	Ginger	DNA	0.5305	0.530941	8.94223	0.499674	0.997806
Ginger1-1_DR	Ginger	DNA	2.49569	2.59329	4.4565	0.428482	0.997806
Ginger1-2_DR	Ginger	DNA	0.519376	0.520782	7.35777	0.589578	0.997806
Ginger1-2_HM	Ginger	DNA	-1.10833	-1.12515	5.89513	0.567178	0.997806
Ginger1-5_HM	Ginger	DNA	1.06216	1.0648	7.63106	0.365385	0.997806
Ginger1-6_HM	Ginger	DNA	-0.986283	-1.01483	5.70439	0.597102	0.997806
Ginger1-N1_DR	Ginger	DNA	3.45555	3.49106	6.0125	0.0641641	0.997806
Ginger2-1_LS	Ginger	DNA	2.4487	2.48875	5.19031	0.172912	0.997806
Gyps2_I-int	Gypsy	LTR	-1.55443	-1.54779	6.93417	0.322689	0.997806
Gypsy-101_AA-LTR	Gypsy	LTR	-2.08827	-2.10776	6.3717	0.169203	0.997806
Gypsy102-I_DR	Gypsy	LTR	-3.90107	-4.02067	5.1509	0.11714	0.997806
Gypsy107-I_Dr	Gypsy	LTR	2.83448	2.97841	5.18769	0.300205	0.997806
Gypsy-10_CPB-I	Gypsy	LTR	0.922333	0.928655	6.36422	0.547595	0.997806
Gypsy-10_OD-I	Gypsy	LTR	1.34754	1.35064	7.94723	0.199295	0.997806
Gypsy-110_DR-I	Gypsy	LTR	0.998287	1.00186	7.20681	0.54047	0.997806
Gypsy118-LTR_DR	Gypsy	LTR	-0.779719	-0.783269	6.82778	0.472969	0.997806
Gypsy119-I_DR	Gypsy	LTR	-1.77063	-1.78685	6.39881	0.223987	0.997806
Gypsy11-I_DR	Gypsy	LTR	2.97249	3.11623	4.78158	0.206876	0.997806
Gypsy11-NVi_I-int	Gypsy	LTR	0.744357	0.767897	4.63444	0.749679	0.997806
Gypsy-11_XT-I	Gypsy	LTR	-1.10873	-1.13085	5.78232	0.573808	0.997806
Gypsy120-LTR_DR	Gypsy	LTR	-0.454195	-0.455781	7.18447	0.675844	0.997806
Gypsy122-LTR_DR	Gypsy	LTR	-1.35527	-1.41693	4.55362	0.542395	0.997806
Gypsy-124_AA-LTR	Gypsy	LTR	-0.740758	-0.750322	6.42095	0.635348	0.997806
Gypsy127-I_DR	Gypsy	LTR	-1.88905	-1.92203	5.20925	0.361265	0.997806
Gypsy-128_AA-I	Gypsy	LTR	2.86286	2.924	5.70361	0.265828	0.997806
Gypsy-12_Adi-I	Gypsy	LTR	0.655527	0.662361	4.83543	0.810713	0.997806
Gypsy-12_DWil-I	Gypsy	LTR	0.506629	0.508384	7.10012	0.616525	0.997806
Gypsy133-I_DR	Gypsy	LTR	7.11938	7.35129	6.13694	0.00644624	0.997806
Gypsy13-I_DR	Gypsy	LTR	1.47067	1.51044	5.08634	0.534712	0.997806
Gypsy-13_LCh-I	LTR	LTR	1.57799	1.61274	4.87454	0.495191	0.997806
Gypsy141-I_DR	Gypsy	LTR	1.67631	1.68602	6.2832	0.292478	0.997806
Gypsy147-I_DR	Gypsy	LTR	1.64777	1.69092	6.02147	0.444039	0.997806
Gypsy149-I_DR	Gypsy	LTR	-0.167305	-0.19889	4.4416	0.940604	0.997806
Gypsy-14_CPB-I	Gypsy	LTR	0.183912	0.191405	4.1424	0.957524	0.997806
Gypsy-14_DWil-I	Gypsy	LTR	-2.56906	-2.67873	4.3556	0.308372	0.997806
Gypsy-14-I_DR	Gypsy	LTR	0.302552	0.316783	4.75958	0.913633	0.997806
Gypsy-14-I_HM	Gypsy	LTR	-3.22075	-3.275	5.70473	0.129173	0.997806
Gypsy-14_LCh-LTR	LTR	LTR	-0.0345729	-0.0357061	5.7271	0.985831	0.997806
Gypsy14-NVi_I-int	Gypsy	LTR	0.693437	0.703675	6.07536	0.603764	0.997806
Gypsy157-I_DR	Gypsy	LTR	-0.370773	-0.527599	4.7134	0.838321	0.997806
Gypsy158-I_DR	Gypsy	LTR	-1.199	-1.28274	5.0924	0.542817	0.997806
Gypsy-15_DBp-LTR	Gypsy	LTR	-0.612085	-0.627616	4.86308	0.824274	0.997806
Gypsy-15_DEl-I	Gypsy	LTR	3.83847	3.90789	6.49807	0.096443	0.997806
Gypsy-15-I_DR	Gypsy	LTR	0.915926	0.948665	4.49876	0.726784	0.997806
Gypsy15-I_SP	Gypsy	LTR	0.50059	0.500574	6.04258	0.813068	0.997806
Gypsy-166_AA-LTR	Gypsy	LTR	-0.401236	-0.363278	4.48755	0.907225	0.997806
Gypsy-16_Adi-I	Gypsy	LTR	-0.386939	-0.44165	4.84138	0.869032	0.997806
Gypsy-16_CPB-I	Gypsy	LTR	-1.67001	-1.70151	5.20415	0.433454	0.997806
Gypsy16-I_AG	Gypsy	LTR	-1.10322	-1.11535	5.71357	0.593651	0.997806
Gypsy-16-I_DR	Gypsy	LTR	4.12949	4.28193	5.85247	0.0519074	0.997806
Gypsy-171_DR-I	Gypsy	LTR	-0.619406	-0.620777	7.94076	0.633523	0.997806
Gypsy-17_GA-I	Gypsy	LTR	-1.6307	-1.94419	4.53757	0.486571	0.997806
Gypsy-17-I_DR	Gypsy	LTR	0.543912	0.550639	5.96861	0.841605	0.997806
Gypsy-17_XT-I	Gypsy	LTR	-3.36001	-3.45604	5.21479	0.165025	0.997806
Gypsy-182_DR-I	Gypsy	LTR	2.54669	2.55975	6.78409	0.0552695	0.997806
Gypsy-18-I_DR	Gypsy	LTR	-3.01846	-3.24165	4.41448	0.28566	0.997806
Gypsy18-I_Dya	Gypsy	LTR	-2.50737	-2.51149	8.4007	0.137785	0.997806
Gypsy-18_LCh-I	LTR	LTR	-1.10814	-1.10743	5.423	0.593614	0.997806
Gypsy-19_CGi-I	Gypsy	LTR	-0.114191	-0.113939	7.44327	0.910099	0.997806
Gypsy-19_GA-I	Gypsy	LTR	3.34783	3.48271	4.68862	0.272218	0.997806
Gypsy-19_SI-I	Gypsy	LTR	-3.9099	-4.38618	4.32764	0.18528	0.997806
Gypsy-1_AC-I	Gypsy	LTR	-0.290996	-0.291127	9.94002	0.767009	0.997806
Gypsy-1_FR-I	Gypsy	LTR	-3.06634	-3.13359	5.32385	0.17539	0.997806
Gypsy1-NVi_I-int	Gypsy	LTR	0.124902	0.125253	7.40578	0.917549	0.997806
Gypsy1-SM_LTR	Gypsy	LTR	0.0386008	0.0386729	4.79632	0.988556	0.997806
Gypsy-206_DR-I	Gypsy	LTR	-0.253336	-0.25395	6.93106	0.880017	0.997806
Gypsy-207_DR-I	Gypsy	LTR	2.49446	2.67433	4.76227	0.427953	0.997806
Gypsy-208_DR-I	Gypsy	LTR	0.516576	0.528629	4.70585	0.842197	0.997806
Gypsy-20-I_DR	Gypsy	LTR	0.68727	0.722402	4.50034	0.774681	0.997806
Gypsy-213_DR-LTR	Gypsy	LTR	3.27907	3.38844	4.66845	0.205115	0.997806
Gypsy-216_DR-I	Gypsy	LTR	0.525195	0.525267	11.7079	0.487956	0.997806
Gypsy-219_DR-I	Gypsy	LTR	4.68911	1.44269e+08	4.36401	0.122103	0.997806
Gypsy-21_GA-I	Gypsy	LTR	1.322	1.57796	5.22249	0.547928	0.997806
Gypsy-21_Gav-I	Gypsy	LTR	-0.312703	-0.316167	5.61503	0.864502	0.997806
Gypsy-21-I_NVi	Gypsy	LTR	-1.87053	-1.89931	5.48181	0.436729	0.997806
Gypsy-21_PBa-LTR	LTR	LTR	-2.275	-2.32029	5.1927	0.340044	0.997806
Gypsy-228_AA-I	Gypsy	LTR	-0.232937	-0.237693	5.07791	0.914763	0.997806
Gypsy-22_DWil-I	Gypsy	LTR	3.84189	4.00704	4.46131	0.204694	0.997806
Gypsy-22_GA-I	Gypsy	LTR	-2.13444	-2.15266	6.35964	0.250998	0.997806
Gypsy-22_GA-LTR	Gypsy	LTR	-1.39159	-1.40268	6.00637	0.415938	0.997806
Gypsy-23_CPB-I	Gypsy	LTR	0.559224	0.582224	5.64913	0.774317	0.997806
Gypsy-23_DEl-I	Gypsy	LTR	-2.67971	-2.71738	5.46779	0.19027	0.997806
Gypsy-23-I_NVi	Gypsy	LTR	-2.08736	-2.129	4.95671	0.458541	0.997806
Gypsy-246_AA-I	Gypsy	LTR	-0.924193	-0.928904	6.64792	0.482009	0.997806
Gypsy-24_DEl-I	Gypsy	LTR	0.601813	0.602148	9.74767	0.442138	0.997806
Gypsy24-I_Dpse	Gypsy	LTR	1.30011	1.30917	6.33915	0.455089	0.997806
Gypsy-24_XT-I	Gypsy	LTR	-0.939446	-0.982125	4.42098	0.769837	0.997806
Gypsy-25_IS-I	Gypsy	LTR	-0.27389	-0.274496	10.0898	0.841199	0.997806
Gypsy-25_LH-LTR	LTR	LTR	3.66662	3.70078	6.15855	0.0315095	0.997806
Gypsy-26_Adi-I	LTR	LTR	-2.02546	-2.08705	4.61523	0.302593	0.997806
Gypsy-26B_AMi-LTR	Gypsy	LTR	2.45631	2.56687	4.45482	0.395412	0.997806
Gypsy-26_GA-I	Gypsy	LTR	-1.09417	-1.10068	6.98333	0.577727	0.997806
Gypsy27-I_AG	Gypsy	LTR	0.448043	0.463953	4.75811	0.809199	0.997806
Gypsy-29_DPu-I	Gypsy	LTR	-0.476262	-0.485218	5.53832	0.812893	0.997806
Gypsy-29_GA-I	Gypsy	LTR	1.68499	1.7051	6.12379	0.467692	0.997806
Gypsy29-I_AG	Gypsy	LTR	4.92315	5.38596	4.1126	0.120923	0.997806
Gypsy-29-I_DR	Gypsy	LTR	-4.68961	-4.77988	5.45856	0.0213612	0.997806
Gypsy-2_DKi-I	Gypsy	LTR	-1.39756	-1.43953	4.71897	0.633417	0.997806
Gypsy-2_LCh-I	LTR	LTR	0.830487	0.858115	4.4985	0.773685	0.997806
Gypsy-30_CPB-I	Gypsy	LTR	-0.286025	-0.286062	11.8022	0.72895	0.997806
Gypsy-30_GA-I	ERV1	LTR	0.769519	0.773683	5.27999	0.757298	0.997806
Gypsy-31_DYa-I	Gypsy	LTR	-2.28576	-1.44269e+08	5.12589	0.213765	0.997806
Gypsy-31-I_DR	Gypsy	LTR	1.11169	1.15408	4.94891	0.625247	0.997806
Gypsy-31-LTR_DR	Gypsy	LTR	-0.0830902	-0.0831651	10.0432	0.911635	0.997806
Gypsy-33_GA-I	Gypsy	LTR	0.289531	0.29008	8.83757	0.768905	0.997806
Gypsy-34_DEl-I	Gypsy	LTR	-0.886899	-0.933944	5.04591	0.715397	0.997806
Gypsy-34_GA-I	Gypsy	LTR	1.14455	1.18366	4.66338	0.624997	0.997806
Gypsy-34_GA-LTR	Gypsy	LTR	-0.940738	-0.948488	6.31761	0.446944	0.997806
Gypsy-34_NVi-I	Gypsy	LTR	1.85457	1.9101	4.7985	0.467011	0.997806
Gypsy-35_CGi-I	Gypsy	LTR	0.217262	0.21774	7.7574	0.864363	0.997806
Gypsy-36_DAn-I	Gypsy	LTR	0.47657	0.473876	4.62732	0.841733	0.997806
Gypsy-36_DPu-I	Gypsy	LTR	-3.86406	-4.04198	4.60056	0.173979	0.997806
Gypsy-36_GA-I	Gypsy	LTR	-0.161801	-0.16162	6.11699	0.917896	0.997806
Gypsy-37_AA-LTR	Gypsy	LTR	-1.51091	-1.51335	8.28117	0.13507	0.997806
Gypsy37-I_AG	Gypsy	LTR	0.836134	0.846163	5.97274	0.623346	0.997806
Gypsy-38_DWil-I	Gypsy	LTR	-0.147633	-0.139677	4.55193	0.961327	0.997806
Gypsy-39_GA-I	Gypsy	LTR	1.97465	2.05331	5.6543	0.30728	0.997806
Gypsy-42_GA-I	Gypsy	LTR	-0.415186	-0.416046	7.93675	0.651514	0.997806
Gypsy-43_DEl-I	Gypsy	LTR	-0.481719	-0.482601	8.39384	0.640625	0.997806
Gypsy-43_DWil-I	Gypsy	LTR	0.128741	0.129144	6.83607	0.921029	0.997806
Gypsy44-LTR_DR	Gypsy	LTR	0.486401	0.49233	5.17592	0.791369	0.997806
Gypsy-46_GA-I	Gypsy	LTR	-1.52194	-1.54292	5.44805	0.38318	0.997806
Gypsy47-I_DR	Gypsy	LTR	-0.202525	-0.202442	7.16917	0.866134	0.997806
Gypsy-49_CGi-I	Gypsy	LTR	-1.27312	-1.3129	4.90432	0.520817	0.997806
Gypsy-49_DEl-I	Gypsy	LTR	-0.0547296	-0.0545714	7.85395	0.962618	0.997806
Gypsy-4_GA-I	Gypsy	LTR	0.363555	0.364185	8.09927	0.691777	0.997806
Gypsy4-I_DR	Gypsy	LTR	0.528809	0.508523	4.57439	0.868165	0.997806
Gypsy-4_OD-I	Gypsy	LTR	3.09506	3.22637	4.49256	0.197971	0.997806
Gypsy-50_GA-LTR	Gypsy	LTR	0.94429	0.950948	6.21863	0.557603	0.997806
Gypsy-51_GA-LTR	Gypsy	LTR	0.156321	0.163072	5.83056	0.921994	0.997806
Gypsy51-I_DR	Gypsy	LTR	2.30333	2.35356	5.11473	0.299873	0.997806
Gypsy-54_DEl-I	Gypsy	LTR	-0.902477	-0.930385	4.7127	0.705808	0.997806
Gypsy-54_GA-I	Gypsy	LTR	-0.384983	-0.38539	9.05901	0.627273	0.997806
Gypsy-55_CGi-I	Gypsy	LTR	-0.551107	-0.555208	6.30455	0.754051	0.997806
Gypsy-55_DWil-I	Gypsy	LTR	-1.32562	-1.34938	5.07081	0.591946	0.997806
Gypsy55-I_DR	Gypsy	LTR	-1.60497	-1.60757	8.40643	0.161979	0.997806
Gypsy-55-I_NV	Gypsy	LTR	-0.0347647	-0.035443	5.94344	0.986298	0.997806
Gypsy-56_GA-I	Gypsy	LTR	0.383525	0.428913	5.09508	0.88086	0.997806
Gypsy56-I_DR	Gypsy	LTR	-2.10124	-2.10919	7.55759	0.048607	0.997806
Gypsy-5_AA-LTR	Gypsy	LTR	2.43222	2.57573	4.85871	0.291038	0.997806
Gypsy-5_DGri-I	Gypsy	LTR	-1.65338	-1.74726	4.84316	0.502059	0.997806
Gypsy5_I-int	Gypsy	LTR	-1.38748	-1.39018	7.99567	0.396091	0.997806
Gypsy61-I_AG	Gypsy	LTR	-0.727507	-0.729002	8.15097	0.484267	0.997806
Gypsy-63_CQ-I	Gypsy	LTR	3.74255	3.88636	5.51764	0.0572828	0.997806
Gypsy63-I_DR	Gypsy	LTR	-2.16899	-2.24614	4.667	0.380197	0.997806
Gypsy64-I_DR	Gypsy	LTR	1.57219	1.602	5.40168	0.431122	0.997806
Gypsy-66_AA-I	Gypsy	LTR	-0.297603	-0.303127	5.87813	0.838955	0.997806
Gypsy-67-I_NV	Gypsy	LTR	-0.246679	-0.278179	4.12955	0.939023	0.997806
Gypsy68-I_AG	Gypsy	LTR	-1.03358	-1.03601	7.09639	0.41412	0.997806
Gypsy-69_CGi-I	Gypsy	LTR	-0.84721	-0.848739	7.95498	0.46121	0.997806
Gypsy-69_PM-I	Gypsy	LTR	-0.343466	-0.322123	5.44159	0.884449	0.997806
Gypsy-6_AA-I	Gypsy	LTR	-0.24496	-0.245106	6.94716	0.851829	0.997806
Gypsy-6_AEc-LTR	LTR	LTR	-0.263089	-0.263836	7.58795	0.779507	0.997806
Gypsy-6_CFl-I	LTR	LTR	-2.01925	-2.05238	5.47322	0.272702	0.997806
Gypsy-6_GA-I	ERV1	LTR	0.728201	0.734812	5.37105	0.700834	0.997806
Gypsy-6_LCh-I	LTR	LTR	0.472234	0.463832	4.96062	0.851871	0.997806
Gypsy-6_LH-I	LTR	LTR	-2.16607	-2.25232	5.21249	0.376475	0.997806
Gypsy-6_PBa-I	LTR	LTR	-3.10964	-3.30549	6.23457	0.0540473	0.997806
Gypsy-70_CGi-I	Gypsy	LTR	-0.143836	-0.144739	7.9342	0.922819	0.997806
Gypsy-71_CQ-LTR	Gypsy	LTR	2.27721	2.53742	4.55096	0.400731	0.997806
Gypsy71-I_DR	Gypsy	LTR	-3.57743	-3.63317	5.65647	0.0915605	0.997806
Gypsy-75_CQ-I	Gypsy	LTR	0.822541	0.855692	4.88748	0.717474	0.997806
Gypsy75-I_DR	Gypsy	LTR	1.64679	1.67265	5.25962	0.343739	0.997806
Gypsy76-I_DR	Gypsy	LTR	-1.21927	-1.22803	6.53896	0.459701	0.997806
Gypsy-7_AC-I	Gypsy	LTR	-1.18982	-1.19176	8.29058	0.255322	0.997806
Gypsy-7_CPB-I	Gypsy	LTR	1.47979	1.48583	6.96377	0.187003	0.997806
Gypsy7-LTR_DR	Gypsy	LTR	2.90739	2.96261	5.40159	0.178928	0.997806
Gypsy-7_PPc-I	Gypsy	LTR	4.89637	1.44269e+08	5.21583	0.0441702	0.997806
Gypsy-82_CQ-I	Gypsy	LTR	-2.35045	-2.43393	5.50094	0.301376	0.997806
Gypsy82-LTR_Dr	Gypsy	LTR	1.2605	1.26274	8.09163	0.165219	0.997806
Gypsy83-I_DR	Gypsy	LTR	-4.82892	-5.11272	4.47776	0.119508	0.997806
Gypsy-86_CQ-I	Gypsy	LTR	0.845881	0.847043	8.66455	0.452322	0.997806
Gypsy-87_AA-I	Gypsy	LTR	-2.43505	-2.46384	5.82696	0.152986	0.997806
Gypsy-8_AMi-I	Gypsy	LTR	-0.884572	-0.888948	6.08135	0.599448	0.997806
Gypsy-8_AMi-LTR	Gypsy	LTR	0.0867144	0.08441	4.91994	0.969749	0.997806
Gypsy-8_CPB-I	Gypsy	LTR	-1.80623	-1.86038	6.7427	0.284336	0.997806
Gypsy-8_DAn-I	Gypsy	LTR	-0.941251	-0.944821	7.54993	0.376087	0.997806
Gypsy-8_DVir-I	Gypsy	LTR	-0.735521	-0.742388	6.2129	0.671354	0.997806
Gypsy8-I_Dpse	Gypsy	LTR	0.128195	0.12823	8.08555	0.891652	0.997806
Gypsy-9_Crp-I	Gypsy	LTR	-2.03203	-2.05824	5.38579	0.307743	0.997806
Gypsy-9_CSa-I	Gypsy	LTR	2.2564	2.32097	5.72154	0.202167	0.997806
Gypsy-9_DAn-I	Gypsy	LTR	-1.78209	-1.83641	4.51235	0.583288	0.997806
Gypsy-9_OD-I	Gypsy	LTR	1.94211	1.97946	5.77584	0.263909	0.997806
HAL1-2a_MD	L1	LINE	1.4836	1.55166	4.24148	0.605366	0.997806
HAL1-3A_ME	L1	LINE	-0.564503	-0.580382	4.60372	0.830409	0.997806
HAL1-3_ME	L1	LINE	-3.2294	-3.39352	4.83111	0.215974	0.997806
HAL1ME	L1	LINE	7.07833	7.54698	4.93989	0.00626603	0.997806
Harbinger-1_DR	PIF-Harbinger	DNA	0.224607	0.224788	8.19012	0.795306	0.997806
Harbinger-1_GA	PIF-Harbinger	DNA	0.0812769	0.0814303	7.84374	0.922355	0.997806
Harbinger-1_XT	PIF-Harbinger	DNA	1.29493	1.31543	5.63519	0.553715	0.997806
Harbinger2-2_NV	PIF-Harbinger	DNA	0.273809	0.274555	5.79361	0.855144	0.997806
Harbinger-2N1_DR	PIF-Harbinger	DNA	-0.89114	-0.891977	9.03234	0.317658	0.997806
Harbinger-2_XT	PIF-Harbinger	DNA	-0.629845	-0.652322	5.12263	0.823646	0.997806
Harbinger-6N1B_CGi	PIF-Harbinger	DNA	1.08729	1.09613	5.9094	0.53713	0.997806
Harbinger-N16_DR	PIF-Harbinger	DNA	0.812481	0.817919	6.31911	0.630254	0.997806
hAT-10_DR	hAT-Tip100	DNA	3.13782	3.21202	5.28358	0.19452	0.997806
hAT-11_AMi	hAT-Ac	DNA	-1.29362	-1.31555	5.73966	0.528708	0.997806
hAT-11_LCh	DNA	DNA	-0.759145	-0.770359	5.4543	0.715326	0.997806
hAT-11_XT	hAT-Charlie	DNA	2.3062	2.35346	4.85789	0.376078	0.997806
hAT-13_DR	hAT-Tip100	DNA	2.21607	2.30431	4.3498	0.424304	0.997806
hAT-14_HM	hAT-Ac	DNA	-0.0547157	-0.0548262	7.53186	0.953851	0.997806
hAT-15_DR	hAT-Ac	DNA	-0.327723	-0.334607	5.18217	0.885597	0.997806
hAT-16_DR	hAT-Ac	DNA	1.41685	1.46121	4.75127	0.636144	0.997806
hAT-16_LMi	hAT-Blackjack	DNA	0.296594	0.296743	9.06235	0.729118	0.997806
hAT-17B_Croc	hAT-Ac	DNA	-1.44588	-1.45781	6.60021	0.259924	0.997806
hAT-17_Croc	hAT-Ac	DNA	-1.69013	-1.7302	5.22485	0.425456	0.997806
hAT-17_DR	hAT-Ac	DNA	0.451889	0.462978	4.84768	0.875784	0.997806
hAT-18_Crp	hAT-Charlie	DNA	-0.049267	-0.111869	4.57024	0.964086	0.997806
hAT-1960_Ami	hAT-Charlie	DNA	-0.579608	-0.58959	5.29289	0.807817	0.997806
hAT-1B_PM	hAT-Charlie	DNA	-2.03186	-2.08299	4.88758	0.45703	0.997806
HAT1_DR	hAT-Ac	DNA	0.764161	0.774983	6.47823	0.640274	0.997806
hAT1_Laf	hAT-Tip100	DNA	-0.744585	-0.753798	5.51308	0.745828	0.997806
hAT-1_LMi	hAT-Tip100	DNA	0.456237	0.45798	7.40091	0.758906	0.997806
hAT-208_Ami	hAT-Blackjack	DNA	0.721611	0.724484	6.97687	0.481924	0.997806
hAT-21_CPB	hAT-Charlie	DNA	-0.388509	-0.389153	8.23439	0.603819	0.997806
hAT-22_DR	hAT-Charlie	DNA	4.35454	4.47402	5.55642	0.029605	0.997806
hAT-22_HM	hAT-Tip100	DNA	0.308611	0.311194	5.638	0.860682	0.997806
hAT-24_LMi	hAT-Tip100	DNA	-0.143413	-0.149305	4.42652	0.959867	0.997806
hAT-26_DR	hAT-Ac	DNA	-1.26165	-1.26534	7.46579	0.244635	0.997806
hAT-27_HM	hAT-Ac	DNA	-3.15984	-3.29838	4.87056	0.166251	0.997806
hAT-27_LCh	DNA	DNA	1.2953	1.374	4.80598	0.517608	0.997806
hAT-28_LCh	DNA	DNA	-2.70416	-2.72318	6.3198	0.0381834	0.997806
hAT-29_DR	hAT-Ac	DNA	1.26588	1.30679	4.99991	0.565873	0.997806
hAT-2B_PM	hAT-Charlie	DNA	4.39237	4.59277	4.63836	0.0592667	0.997806
hAT-2_DR	hAT-Charlie	DNA	2.13221	2.17741	5.05007	0.30288	0.997806
hAT-2_HM	hAT-Tag1	DNA	2.3994	2.455	5.19422	0.30233	0.997806
hAT-2n1_DR	hAT-Charlie	DNA	-0.484728	-0.486395	7.28871	0.702992	0.997806
hAT-310_Ami	hAT-Charlie	DNA	2.26418	2.2828	6.02683	0.154086	0.997806
hAT-37_SM	hAT-Tip100	DNA	2.76577	2.80995	5.53801	0.172423	0.997806
hAT-3_LCh	DNA	DNA	-2.81173	-2.86048	5.35576	0.161056	0.997806
hAT-40_HM	hAT-Tip100	DNA	1.06393	1.0828	5.27702	0.611499	0.997806
hAT-42_HM	hAT-Tip100	DNA	-2.0355	-2.04131	7.57576	0.124962	0.997806
hAT-42_Lch	DNA	DNA	-0.106035	-0.101991	5.38112	0.959503	0.997806
hAT-4B_ACar	hAT-Ac	DNA	-0.207285	-0.210994	5.00221	0.911995	0.997806
hAT-4B_AMi	hAT-Ac	DNA	-0.976259	-0.979019	7.49788	0.384267	0.997806
HAT4_CI	hAT-Ac	DNA	0.509879	0.514136	6.29616	0.768419	0.997806
hAT-4_PBa	DNA	DNA	-0.113301	-0.113207	11.5913	0.892545	0.997806
hAT-50_HM	hAT-Tip100	DNA	-0.433621	-0.434711	7.6186	0.620616	0.997806
hAT-51_HM	hAT-Tip100	DNA	2.22544	2.26273	5.19877	0.19703	0.997806
hAT-54_HM	hAT-Tip100	DNA	0.611243	0.63932	4.56263	0.8147	0.997806
hAT-56_HM	hAT-Tip100	DNA	0.674782	0.690033	5.29302	0.733443	0.997806
hAT-5_LCh	DNA	DNA	-0.0380345	-0.0376714	5.1495	0.985663	0.997806
hAT-5N1_DK	hAT-hobo	DNA	-0.921604	-0.935541	5.30572	0.662423	0.997806
hAT5-N1_GA	hAT-hAT5	DNA	3.06286	3.21649	4.5275	0.296948	0.997806
HAT5N_CI	hAT-Ac	DNA	-1.63006	-1.66599	5.107	0.385477	0.997806
hAT6-2_NV	hAT-Blackjack	DNA	-0.214106	-0.218398	4.96799	0.926855	0.997806
hAT6-2_SP	hAT-Blackjack	DNA	-0.11809	-0.118116	10.5342	0.851632	0.997806
hAT-6B_PM	hAT-Charlie	DNA	0.0368527	0.0368734	7.55518	0.968493	0.997806
hAT-6_GA	hAT-Charlie	DNA	0.0326964	0.0328941	7.23236	0.977901	0.997806
hAT-6_XT	hAT-Charlie	DNA	-0.363695	-0.364479	7.79544	0.675111	0.997806
hAT-7_AMi	hAT-Charlie	DNA	-0.0840466	-0.0850788	5.88984	0.956343	0.997806
hAT-8_CPB	hAT-Charlie	DNA	-1.24641	-1.25206	7.01002	0.481543	0.997806
hAT-8_PM	hAT-Charlie	DNA	-1.37367	-1.38165	6.51448	0.452491	0.997806
hAT-9_DR	hAT-Charlie	DNA	6.09985	1.44269e+08	5.19879	0.078103	0.997806
hATm-19_HM	hAT-hATm	DNA	-0.323383	-0.326421	5.83	0.824361	0.997806
hATm-3_AA	hAT-hATm	DNA	-2.3895	-2.45526	4.76913	0.272118	0.997806
hATm-5_HM	hAT-hATm	DNA	-0.149492	-0.14998	9.11101	0.852302	0.997806
hAT-N106_DR	hAT	DNA	0.925693	0.937973	5.39326	0.573036	0.997806
hAT-N108_DR	hAT-Ac	DNA	0.448486	0.459981	4.81608	0.859403	0.997806
HATN11B_DR	hAT	DNA	0.537248	0.539726	6.71386	0.649257	0.997806
HATN11_DR	hAT	DNA	-2.72863	-2.74629	6.55751	0.0450523	0.997806
hAT-N122_DR	hAT-Ac	DNA	-1.99588	-2.23119	4.45252	0.524855	0.997806
hAT-N126_DR	hAT-Ac	DNA	0.68968	0.702655	4.97688	0.792003	0.997806
hAT-N127_DR	hAT-Charlie	DNA	-0.434779	-0.436251	6.88174	0.733398	0.997806
hAT-N12_LMi	hAT-Ac	DNA	-0.440815	-0.444777	5.70116	0.833552	0.997806
hAT-N131_DR	hAT-Ac	DNA	-0.841475	-0.843024	8.02551	0.338734	0.997806
hAT-N137_DR	hAT-Tol2	DNA	0.913679	0.919526	6.52672	0.432582	0.997806
hAT-N138_DR	hAT-Tol2	DNA	-3.10041	-3.19344	4.7268	0.18883	0.997806
hAT-N13_AMi	hAT-Blackjack	DNA	0.275084	0.275627	7.09635	0.849826	0.997806
hAT-N141_DR	hAT-Charlie	DNA	-3.0321	-3.13935	4.73407	0.272036	0.997806
hAT-N144_DR	hAT	DNA	0.490308	0.490525	9.94082	0.42134	0.997806
hAT-N145_DR	hAT-Tol2	DNA	-0.0611357	-0.0666934	5.19359	0.981454	0.997806
hAT-N147_DR	hAT-Charlie	DNA	0.335782	0.336679	8.51917	0.737672	0.997806
hAT-N16_Crp	hAT-Charlie	DNA	-1.08434	-1.11732	4.92159	0.708666	0.997806
HATN17_DR	hAT	DNA	-2.32194	-2.48045	4.56323	0.340683	0.997806
hAT-N1_CSa	hAT-Charlie	DNA	-0.234183	-0.234293	5.31322	0.890911	0.997806
hAT-N1_FR	hAT-Charlie	DNA	2.57585	2.59833	6.05303	0.109971	0.997806
hAT-N21B_CPB	hAT-Charlie	DNA	0.874164	0.88311	6.21093	0.520823	0.997806
hAT-N21_DR	hAT-Charlie	DNA	-1.57695	-1.5856	6.56109	0.232207	0.997806
hAT-N24_Crp	hAT-Charlie	DNA	-0.116761	-0.0876601	4.38345	0.974337	0.997806
hAT-N25B_DR	hAT-Ac	DNA	-0.335904	-0.343672	5.07793	0.899714	0.997806
hAT-N26_DR	hAT	DNA	3.76704	3.93161	4.53657	0.232933	0.997806
hATN-28_DRe	hAT-Charlie	DNA	-3.89126	-4.00552	4.9503	0.106503	0.997806
hAT-N2A_XT	hAT-Ac	DNA	-1.4483	-1.45199	8.12747	0.194069	0.997806
hAT-N35B_DR	hAT-Ac	DNA	-0.837094	-0.838503	8.24678	0.402932	0.997806
hAT-N35C_DR	hAT-Ac	DNA	0.434287	0.436261	7.61204	0.712007	0.997806
hAT-N36_DR	hAT	DNA	-4.52762	-4.78236	4.55781	0.0903729	0.997806
hAT-N37_DR	hAT-Charlie	DNA	-1.94103	-1.44269e+08	4.08275	0.337701	0.997806
hAT-N45B_DR	hAT	DNA	-0.620028	-0.642966	4.93892	0.831299	0.997806
hAT-N45_DR	hAT	DNA	1.87179	1.89914	5.34593	0.40465	0.997806
hAT-N47B_DR	hAT	DNA	0.425697	0.433342	5.64339	0.805547	0.997806
hAT-N49_DR	hAT-Ac	DNA	5.56829	6.08141	3.96795	0.117911	0.997806
hAT-N50B_DR	hAT-Ac	DNA	-0.395191	-0.39587	7.86927	0.639617	0.997806
hAT-N52B_DR	hAT-Ac	DNA	1.22295	1.2233	10.9981	0.293649	0.997806
hAT-N53_DR	hAT-Ac	DNA	-0.0404504	-0.0405299	9.529	0.955494	0.997806
hAT-N5_ACar	hAT-Tip100	DNA	5.55372	5.78308	4.68105	0.059033	0.997806
hAT-N68_DR	hAT-Ac	DNA	-1.60509	-1.66744	4.61857	0.477743	0.997806
hAT-N6_ACar	hAT-Charlie	DNA	0.263903	0.28987	4.59883	0.915403	0.997806
hAT-N6_ASi	hAT-Ac	DNA	0.248074	0.248626	4.83286	0.90411	0.997806
hAT-N70_DR	hAT	DNA	0.457859	0.461359	6.29189	0.697551	0.997806
hAT-N71_DR	Zisupton	DNA	0.249913	0.250091	7.014	0.80331	0.997806
hAT-N74_DR	hAT-Ac	DNA	-1.36881	-1.37355	7.49341	0.277109	0.997806
HATN7_DR	hAT	DNA	0.486109	0.503134	5.02509	0.857148	0.997806
hAT-N81_DR	hAT-Charlie	DNA	-0.823816	-0.834346	5.73961	0.615787	0.997806
hAT-N91_DR	hAT-Ac	DNA	-2.11416	-2.16173	4.93287	0.344205	0.997806
hAT-N93_DR	hAT-Ac	DNA	0.739337	0.74683	6.27628	0.647325	0.997806
hAT-N97_DR	hAT-Ac	DNA	-2.71979	-2.75718	5.67894	0.135163	0.997806
hATw-2_BF	hAT-hATw	DNA	-2.74741	-2.83903	4.81728	0.291703	0.997806
HE1_DR1	tRNA-V	SINE	-0.588573	-0.592072	6.40935	0.682852	0.997806
HE1_MM	tRNA-V-CR1	SINE	1.31952	1.34541	5.25344	0.513837	0.997806
HE1_SINE	tRNA-V-CR1	SINE	0.703679	0.707616	6.86872	0.612546	0.997806
HEL	Helitron	RC	-0.258677	-0.276538	4.44804	0.917449	0.997806
Helitron-1_AC	Helitron	RC	-1.42041	-1.51003	5.08922	0.54731	0.997806
Helitron-1_AP	Helitron	RC	3.54255	3.65918	4.76299	0.100133	0.997806
Helitron-1_DR	Helitron	RC	0.798969	0.801666	5.19045	0.672197	0.997806
Helitron-1_HM	Helitron	RC	-2.11363	-2.15437	4.68042	0.446424	0.997806
Helitron2_CE	Helitron	RC	4.6318	5.05065	4.63843	0.108749	0.997806
Helitron-2_DR	Helitron	RC	-0.875156	-0.875398	10.5235	0.311605	0.997806
Helitron-2_DVir	Helitron	RC	1.45433	1.5022	4.611	0.525682	0.997806
Helitron-3N3_PM	Helitron	RC	0.886354	0.890026	7.04756	0.468652	0.997806
Helitron-4_DR	Helitron	RC	1.56981	1.57244	8.20337	0.129615	0.997806
Helitron-6_CGi	Helitron	RC	0.818381	0.820007	7.95421	0.365693	0.997806
Helitron-9_CGi	Helitron	RC	0.0791857	0.0671979	5.58977	0.977603	0.997806
Helitron-N18_CGi	Helitron	RC	-1.54951	-1.57827	4.98245	0.387563	0.997806
Helitron-N1B_CGi	Helitron	RC	-0.388225	-0.398068	5.03664	0.872593	0.997806
HelitronN-1_DPe	Helitron	RC	-2.50232	-2.56859	4.99594	0.420692	0.997806
Helitron-N1_HSal	DNA	DNA	-1.05943	-1.05667	5.50128	0.574983	0.997806
Helitron-N1_PBa	DNA	DNA	-0.913189	-0.915612	7.56996	0.413097	0.997806
Helitron-N26_CGi	Helitron	RC	-0.362067	-0.362105	12.1642	0.51288	0.997806
Helitron-N2_DR	Helitron	RC	0.704801	0.715637	5.17048	0.749529	0.997806
HER_LINE	CR1	LINE	1.78712	1.79211	7.75891	0.0933459	0.997806
HERO-1_BF	R2-Hero	LINE	1.81597	1.88221	4.69346	0.477888	0.997806
HERO-2_DR	R2-Hero	LINE	3.87366	3.94344	5.38474	0.0610066	0.997806
HERO-3_DR	R2-Hero	LINE	-1.14587	-1.18104	4.71039	0.690152	0.997806
HEROFr	R2-Hero	LINE	-0.239549	-0.240978	7.51907	0.848921	0.997806
HERVE-int	ERV1	LTR	-0.303813	-0.305829	5.96459	0.831618	0.997806
HERVIP10B3-int	ERV1	LTR	-0.404003	-0.407946	6.26037	0.824282	0.997806
HERVK22-int	ERVK	LTR	0.10913	0.105235	6.13414	0.937985	0.997806
HERVL66-int	ERVL	LTR	0.125204	0.120264	6.02075	0.945569	0.997806
HERVL-int	ERVL	LTR	0.239677	0.242094	6.52513	0.881669	0.997806
HERVS71-int	ERV1	LTR	-4.74758	-1.44269e+08	5.34417	0.0338837	0.997806
Hoana6	hAT-Ac	DNA	-0.600174	-0.692976	4.79254	0.810805	0.997806
Homo6	hAT-Pegasus	DNA	0.84417	0.872084	5.68798	0.726449	0.997806
I-3_AC	I	LINE	-2.71622	-2.8326	4.91981	0.230227	0.997806
I-3_DR	I	LINE	2.16935	2.25666	5.24249	0.32958	0.997806
I-4_AC	I	LINE	1.27186	1.27297	8.90844	0.25208	0.997806
I-5_DR	I	LINE	3.77848	3.85273	5.83511	0.0568529	0.997806
I_Ele8	I	LINE	4.80998	4.93632	5.60021	0.0283007	0.997806
IMPB_01	Satellite	Satellite	-0.470715	-0.471396	8.48222	0.605936	0.997806
IMPB_02	Satellite	Satellite	-3.28341	-3.34784	5.33219	0.12789	0.997806
IS3EU-1_DR	IS3EU	DNA	-0.235084	-0.235826	7.33289	0.818155	0.997806
IS3EU-2_DR	IS3EU	DNA	0.739656	0.754571	4.60418	0.806728	0.997806
IS3EU-4_DR	IS3EU	DNA	-0.172858	-0.173482	6.96411	0.858724	0.997806
IS3EU-5_DR	IS3EU	DNA	3.16554	3.28941	4.72772	0.220102	0.997806
ISL2EU-11_CGi	PIF-ISL2EU	DNA	0.780387	0.78763	5.87141	0.695293	0.997806
ISL2EU-18_CGi	PIF-ISL2EU	DNA	-0.983325	-0.998951	5.10627	0.6043	0.997806
ISL2EU-1_ADi	PIF-ISL2EU	DNA	-1.11837	-1.13711	5.38554	0.65138	0.997806
ISL2EU-1_DR	PIF-ISL2EU	DNA	-0.350638	-0.350358	4.99171	0.878	0.997806
ISL2EU-1_SK	PIF-ISL2EU	DNA	0.971023	0.979933	6.03312	0.558991	0.997806
ISL2EU-3_CFl	DNA	DNA	0.648656	0.660546	5.43914	0.722707	0.997806
ISL2EU-3N1_CFl	DNA	DNA	-0.397276	-0.397845	8.95067	0.713539	0.997806
ISL2EU-7_CGi	PIF-ISL2EU	DNA	-0.122497	-0.112497	5.026	0.962999	0.997806
ISL2EU-8_CGi	PIF-ISL2EU	DNA	2.96514	2.97429	7.71137	0.00979046	0.997806
ISL2EU-N1_CGi	PIF-ISL2EU	DNA	-1.06698	-1.14704	4.63465	0.678405	0.997806
Jockey-11_DF	Jockey	LINE	-3.06203	-3.09644	5.81847	0.0622732	0.997806
Jockey-14_DBp	Jockey	LINE	-0.938495	-0.941563	8.07931	0.504096	0.997806
Jockey-2_DGri	Jockey	LINE	-1.30581	-1.32797	5.52871	0.437635	0.997806
Jockey-3_DGri	Jockey	LINE	-0.0936476	-0.0940632	7.72253	0.916536	0.997806
Jockey-3_DPer	Jockey	LINE	-0.918142	-0.921018	7.67021	0.327348	0.997806
Jockey-3_DRh	LTR	LTR	-1.11822	-1.1355	5.65274	0.732533	0.997806
Jockey-6_DK	Jockey	LINE	-0.726906	-0.729517	7.92183	0.477587	0.997806
KibiFr1	L1	LINE	-0.894524	-0.89466	11.5291	0.235541	0.997806
Kiri-10_AAe	L2	LINE	3.1768	3.263	4.74271	0.185719	0.997806
Kiri-2_AAe	L2	LINE	-3.83378	-4.09588	4.79966	0.127346	0.997806
Kiri-2_DTa	L2	LINE	-5.01916	-1.44269e+08	5.9087	0.0350734	0.997806
Kiri-31_AAe	L2	LINE	2.32675	2.35063	6.47652	0.184721	0.997806
Kiri-3_CQ	L2	LINE	-0.388107	-0.401702	5.49701	0.843089	0.997806
Kolobok-12_CGi	DNA	DNA	-1.24121	-1.24681	7.15372	0.349502	0.997806
Kolobok-18_HM	Kolobok-Hydra	DNA	-1.13528	-1.15081	6.36669	0.564748	0.997806
Kolobok-1_DR	Kolobok-T2	DNA	1.93089	1.95497	5.53856	0.339197	0.997806
Kolobok-1_Ppac	Kolobok-T2	DNA	0.555374	0.558282	6.63057	0.630556	0.997806
Kolobok-2_AA	Kolobok-Hydra	DNA	-4.69465	-4.84758	4.83346	0.0669525	0.997806
Kolobok-2_AP	DNA	DNA	-2.5568	-2.71697	5.1242	0.169574	0.997806
Kolobok-2_Aplcal	Kolobok-Hydra	DNA	-0.295306	-0.31587	4.66387	0.905824	0.997806
Kolobok-2_CGi	Kolobok-T2	DNA	1.40444	1.43497	4.96786	0.536434	0.997806
Kolobok-2_XT	Kolobok-T2	DNA	-0.52688	-0.52731	9.2392	0.496899	0.997806
Kolobok-3_Aplcal	Kolobok-Hydra	DNA	1.53709	1.54356	6.91283	0.186479	0.997806
Kolobok-3_DR	Kolobok-T2	DNA	0.655269	0.661111	5.99802	0.639323	0.997806
Kolobok-7_CGi	Kolobok-Hydra	DNA	1.7285	1.74726	5.86649	0.489467	0.997806
Kolobok-N1_AEc	DNA	DNA	0.559817	0.560677	9.07571	0.559086	0.997806
Kolobok-N4_XT	Kolobok-T2	DNA	-0.476166	-0.487942	6.00652	0.795998	0.997806
Kolobok-N7_CGi	Kolobok	DNA	-0.520996	-0.5202	6.07744	0.745168	0.997806
L1-102_DR	L1	LINE	1.18241	1.19448	5.77976	0.433977	0.997806
L1-105_DR	L1	LINE	-0.991246	-1.01086	4.77097	0.659918	0.997806
L1-108_DR	L1	LINE	-1.0356	-1.03959	6.83764	0.479779	0.997806
L1-10_DR	L1	LINE	4.16968	4.50189	4.26001	0.143848	0.997806
L1-11_DR	L1	LINE	0.398882	0.399739	7.9088	0.67873	0.997806
L1-12_DR	L1	LINE	0.445824	0.452749	5.85487	0.821972	0.997806
L1-14_DR	L1	LINE	0.763347	0.794127	5.0191	0.69138	0.997806
L1-16_DR	L1	LINE	-1.0276	-1.03037	7.56601	0.32616	0.997806
L1-17a_Lch	LINE	LINE	1.6096	1.64755	4.69954	0.491472	0.997806
L1-1A_Cpo	L1	LINE	-0.11317	-0.112933	8.94708	0.905209	0.997806
L1-1_AFC	L1	LINE	-0.222211	-0.222229	12.6711	0.722494	0.997806
L1-1B_Opr	L1	LINE	-2.40275	-2.62015	4.23907	0.546629	0.997806
L1-1_CPB	L1	LINE	-0.289521	-0.304509	5.48595	0.865115	0.997806
L1-1_DN	L1	LINE	1.13049	1.13942	6.05698	0.540263	0.997806
L1-1_DR	L1	LINE	-2.80831	-2.84232	5.93233	0.152676	0.997806
L1-1_ME	L1	LINE	1.56789	1.63828	5.14108	0.430848	0.997806
L1-1_OP	L1	LINE	0.422895	0.428719	5.60883	0.80032	0.997806
L1-1_Pca	L1	LINE	0.56517	0.573819	4.28087	0.855966	0.997806
L1-21_Lch	LINE	LINE	2.24229	2.30354	5.04594	0.29528	0.997806
L1-24_DR	L1	LINE	-0.747025	-0.748929	7.60865	0.469259	0.997806
L1-25_DR	L1	LINE	-0.324877	-0.343971	5.19588	0.868879	0.997806
L1-26_DR	L1	LINE	2.34268	2.37272	5.86151	0.160351	0.997806
L1-27_DR	L1	LINE	2.36915	2.40016	5.58596	0.195571	0.997806
L1-2_LCh	LINE	LINE	-1.00779	-1.01531	6.18512	0.561161	0.997806
L1-31_DR	L1	LINE	0.137627	0.137331	6.51176	0.937773	0.997806
L1-32_DR	L1	LINE	1.88175	1.89157	6.96914	0.195154	0.997806
L1-33_ACar	L1	LINE	-0.150624	-0.149536	6.71867	0.939868	0.997806
L1-34_DR	L1	LINE	-2.82693	-2.85896	6.23102	0.101169	0.997806
L1-36_ACar	L1	LINE	1.75555	1.77013	6.38565	0.217248	0.997806
L1-37_DR	L1	LINE	-2.66642	-3.10186	4.86253	0.243075	0.997806
L1-3_PVa	L1	LINE	1.31373	1.32448	5.55023	0.593064	0.997806
L1-3_TS	L1	LINE	-3.16174	-3.22574	5.32581	0.318031	0.997806
L1-40_DR	L1	LINE	-0.855343	-0.856066	9.05543	0.348867	0.997806
L1-42_DR	L1	LINE	1.96123	2.00933	5.71487	0.290032	0.997806
L1-43_DR	L1	LINE	-1.80686	-1.8885	4.9016	0.498612	0.997806
L1-44_DR	L1	LINE	-0.743562	-0.751522	5.55446	0.70883	0.997806
L1-45_DR	L1	LINE	-2.34124	-2.36022	6.37517	0.129991	0.997806
L1-47B_ACar	L1	LINE	-0.104741	-0.105029	7.9241	0.896782	0.997806
L1-47_DR	L1	LINE	-0.0380613	-0.0390636	6.483	0.975437	0.997806
L1-48_DR	L1	LINE	0.296737	0.298809	6.36489	0.8352	0.997806
L1-49_DR	L1	LINE	-1.65282	-1.73259	4.37046	0.604996	0.997806
L1-4_Cho	L1	LINE	1.41976	1.61022	4.1014	0.668999	0.997806
L1-50_DR	L1	LINE	1.16211	1.16907	6.67648	0.351184	0.997806
L1-51_DR	L1	LINE	-0.580616	-0.582907	6.72213	0.631218	0.997806
L1-53_DR	L1	LINE	1.80601	1.81426	6.8052	0.211707	0.997806
L1-56_DR	L1	LINE	0.213659	0.214392	7.1568	0.865383	0.997806
L1-58_ACar	L1	LINE	-2.79388	-2.87831	4.6625	0.27431	0.997806
L1-59_DR	L1	LINE	-0.179955	-0.178556	5.35758	0.931741	0.997806
L1-60_ACar	L1	LINE	1.16655	1.17835	5.77837	0.457592	0.997806
L1-61_ACar	L1	LINE	-2.02026	-2.07137	6.26818	0.239692	0.997806
L1-63_DR	L1	LINE	1.11639	1.14936	4.83908	0.560325	0.997806
L1-64_DR	L1	LINE	-0.0495894	-0.0498569	8.12157	0.967468	0.997806
L1-65_DR	L1	LINE	0.46263	0.473944	5.25406	0.826251	0.997806
L1-66_DR	L1	LINE	-1.23361	-1.24404	5.82966	0.569012	0.997806
L1-67_DR	L1	LINE	1.27925	1.29148	5.9328	0.336859	0.997806
L1-68_DR	L1	LINE	-0.276954	-0.279049	6.18326	0.886651	0.997806
L1-72_DR	L1	LINE	-4.38251	-4.73523	4.73763	0.168976	0.997806
L1-74_DR	L1-Tx1	LINE	1.27326	1.28256	6.3	0.418399	0.997806
L1-75_DR	L1	LINE	2.42457	2.44863	6.15411	0.0726189	0.997806
L1-78_DR	L1	LINE	0.763461	0.776153	4.76569	0.800026	0.997806
L1-81_DR	L1	LINE	-5.02033	-5.29614	4.31674	0.0388231	0.997806
L1-83_DR	L1	LINE	3.11594	3.28277	4.37998	0.245614	0.997806
L1-85_DR	L1-Tx1	LINE	2.26242	2.28636	5.9851	0.282636	0.997806
L1-87_DR	L1	LINE	0.664349	0.909872	4.01787	0.797939	0.997806
L1-88_DR	L1	LINE	0.56874	0.586336	5.66624	0.785591	0.997806
L1-8_DR	L1	LINE	1.37438	1.39775	5.99658	0.382371	0.997806
L1-92_DR	L1	LINE	-1.21636	-1.23387	5.17538	0.517519	0.997806
L1-94_DR	L1	LINE	1.83045	1.85965	5.96413	0.322786	0.997806
L1-95_DR	L1	LINE	-1.38713	-1.42084	4.75955	0.50365	0.997806
L1-98_DR	L1	LINE	-0.085789	-0.0867416	6.18934	0.95868	0.997806
L1_AC_7	L1	LINE	2.86845	2.96249	4.7462	0.133258	0.997806
L1A_Oc	L1	LINE	-1.4694	-1.50272	5.87869	0.411686	0.997806
L1_Cf	L1	LINE	-4.00327	-4.2933	4.31077	0.149157	0.997806
L1_Ele3	L1	LINE	0.418857	0.419172	9.76954	0.524748	0.997806
L1_Ele5	L1	LINE	1.44147	1.46578	5.58143	0.37798	0.997806
L1M4c	L1	LINE	2.50946	2.56354	5.99394	0.196996	0.997806
L1_Mars1b	L1	LINE	-0.659865	-0.678164	5.40368	0.665236	0.997806
L1MdMus_II	L1	LINE	1.99702	2.02905	5.23149	0.284577	0.997806
L2-11_DRe	L2	LINE	-1.11181	-1.11984	5.56208	0.573328	0.997806
L2-12a_Lch	LINE	LINE	1.23188	1.27209	4.50682	0.577365	0.997806
L2-12b_Lch	LINE	LINE	-0.362012	-0.363825	6.65903	0.75573	0.997806
L2-14_DRe	L2	LINE	-0.893265	-0.897473	6.65733	0.571487	0.997806
L2-16_DRe	Rex-Babar	LINE	0.11684	0.117184	6.79145	0.928975	0.997806
L2-16_NVe	L2	LINE	0.202049	0.202122	9.96789	0.844508	0.997806
L2-17_DRe	L2	LINE	0.0691238	0.0678168	5.37569	0.974956	0.997806
L2-1c_Cis	L2	LINE	4.86282	5.27001	4.81151	0.0654704	0.997806
L2-1_DPu	L2	LINE	1.33226	1.3775	4.93657	0.670277	0.997806
L2-1_DR	L2	LINE	-0.13372	-0.13428	7.36781	0.894676	0.997806
L2-1_FR1	L2	LINE	0.221872	0.22238	7.49691	0.823946	0.997806
L2-1_LCh	LINE	LINE	1.41826	1.4333	6.03507	0.523683	0.997806
L2-1_PM	L2	LINE	-0.347953	-0.350114	6.10994	0.84019	0.997806
L2-1_SIn	LINE	LINE	3.25697	3.29004	5.96914	0.0408801	0.997806
L2-21_ACar	L2	LINE	1.20836	1.25405	5.14701	0.584677	0.997806
L2-25_ACar	L2	LINE	-1.04905	-1.05109	7.18531	0.379899	0.997806
L2-32_DRe	L2	LINE	-0.456154	-0.465554	5.59281	0.794477	0.997806
L2-34_DR	L2	LINE	-1.7133	-1.71798	7.52812	0.0877658	0.997806
L2-3_DRe	L2	LINE	0.515065	0.515899	8.57599	0.552117	0.997806
L2-41_DRe	L2	LINE	-0.483879	-0.484132	9.84065	0.460088	0.997806
L2-42_DRe	L2	LINE	1.77608	1.79337	6.20265	0.290271	0.997806
L2-43_DR	L2	LINE	-0.315025	-0.315179	9.93265	0.618211	0.997806
L2-44_DR	L2	LINE	-0.840702	-0.845882	6.39255	0.534485	0.997806
L2-45_DR	L2	LINE	-0.778235	-0.781738	6.91261	0.486819	0.997806
L2-46_DR	L2	LINE	0.838074	0.838851	9.08432	0.304834	0.997806
L2-47_DR	L2	LINE	2.11159	2.14996	5.10763	0.31395	0.997806
L2-49_DR	L2	LINE	-0.261335	-0.261987	7.63154	0.83481	0.997806
L2-4_DRe	L2	LINE	1.8794	1.91556	5.30173	0.344917	0.997806
L2-4_LCh	LINE	LINE	-0.716332	-0.717149	5.8701	0.638859	0.997806
L2-51_DR	L2	LINE	-1.00084	-1.0026	8.22732	0.361322	0.997806
L2-53_DR	L2	LINE	0.629361	0.631161	7.52282	0.56271	0.997806
L2-54_DR	L2	LINE	-0.56124	-0.562025	8.43845	0.467538	0.997806
L2-56_DR	L2	LINE	-4.44122	-4.57658	5.07827	0.0644366	0.997806
L2-5_DRe	L2	LINE	2.77627	2.88941	4.56649	0.359752	0.997806
L2-5_NVi	L2	LINE	-5.59341	-5.87088	4.9737	0.0845065	0.997806
L2-5_PM	L2	LINE	-1.50648	-1.61574	4.14418	0.637586	0.997806
L2-68_HMa	L2	LINE	-1.84294	-1.91554	4.5145	0.440438	0.997806
L2-6_DRe	L2	LINE	0.339229	0.345222	5.23099	0.872694	0.997806
L2-7_DRe	L2	LINE	1.83872	1.8719	5.48188	0.275023	0.997806
L2-8_LCh	LINE	LINE	0.474327	0.467545	4.7278	0.851225	0.997806
L2-9_LCh	LINE	LINE	2.28362	2.30736	5.77391	0.108059	0.997806
L2_AC_11	L2	LINE	2.85562	2.8582	9.40677	0.0148004	0.997806
L2_AC_14	L2	LINE	-0.875179	-0.883425	5.96175	0.529069	0.997806
L2_AC_6	L2	LINE	-2.53508	-2.60336	4.89608	0.40557	0.997806
L2B-1_CP	L2	LINE	0.33043	0.325645	5.26257	0.891294	0.997806
L2B-5_AAe	L2	LINE	-0.774172	-0.78069	6.33331	0.569741	0.997806
LatiHarb1-1	DNA	DNA	1.40184	1.4206	5.34485	0.387945	0.997806
LatiHarb1-2	DNA	DNA	-0.13183	-0.131994	9.42052	0.876828	0.997806
LIN4b_SM	R2	LINE	-1.38378	-1.39814	5.56505	0.445059	0.997806
LINEX-1_DR	Retroposon	Retroposon	0.0876163	0.0879046	7.23199	0.95295	0.997806
LINEX-2_DR	Retroposon	Retroposon	-0.16475	-0.171816	5.18504	0.914955	0.997806
LmeSINE1e	SINE	SINE	6.29434	1.44269e+08	4.67739	0.0128922	0.997806
Loa-1_DPs	LOA	LINE	-2.30172	-1.44269e+08	3.85822	0.305644	0.997806
Loa-1_LHu	LINE	LINE	-0.817183	-0.818099	8.85091	0.31667	0.997806
LOA-5_CQ	LOA	LINE	-0.91979	-1.07598	4.31776	0.734166	0.997806
LOA_Ele2B_AAe	LOA	LINE	0.246665	0.21872	4.57271	0.942918	0.997806
LOOPERN2_DR	Kolobok-T2	DNA	0.0971193	0.0973042	8.36748	0.910399	0.997806
LOOPERN6_DR	PiggyBac	DNA	-1.70914	-1.76408	4.63704	0.526774	0.997806
LSU-rRNA_Hsa	rRNA	rRNA	-1.64144	-1.65514	5.9569	0.26514	0.997806
LTR11_Ami	Gypsy	LTR	-1.10292	-1.12036	5.20992	0.527909	0.997806
LTR-12B1_Crp	ERV1	LTR	0.236801	0.239842	5.27402	0.888433	0.997806
LTR12B_Tbel	ERV1	LTR	-0.215008	-0.2337	4.35105	0.94273	0.997806
LTR-12D_Crp	ERV1	LTR	-2.40022	-2.46584	4.86186	0.353102	0.997806
LTR12D_EE	ERVK	LTR	0.22578	0.226405	7.75213	0.845923	0.997806
LTR-12D_Gav	ERV1	LTR	-0.958208	-0.961929	7.21733	0.349536	0.997806
LTR-13_Crp	ERV4	LTR	0.992072	1.03736	4.41696	0.712786	0.997806
LTR-14A1_Crp	Gypsy	LTR	0.512463	0.515876	6.39749	0.646977	0.997806
LTR14D_SS	ERVK	LTR	-4.20903	-4.43029	4.56946	0.19815	0.997806
LTR-14_Gav	ERV4	LTR	3.54448	3.65906	5.65955	0.112774	0.997806
LTR18_Cja	ERV1	LTR	1.81126	1.85986	4.89373	0.436942	0.997806
LTR1A2_OG	ERV1	LTR	-0.169048	-0.16401	5.26855	0.926305	0.997806
LTR1B2_OG	ERV1	LTR	0.542125	0.517902	4.62299	0.850543	0.997806
LTR-1B_NV	LTR	LTR	-0.795163	-0.797341	7.55058	0.466522	0.997806
LTR21_MD	ERV1	LTR	2.15573	2.21599	5.00517	0.372353	0.997806
LTR24_Sar	ERVK	LTR	-0.0233659	-0.0233624	11.4371	0.972112	0.997806
LTR2C_Opr	ERVK	LTR	0.977604	0.980594	7.24126	0.37984	0.997806
LTR32_Ttr	ERV1	LTR	-1.88501	-1.92259	6.18265	0.27689	0.997806
LTR44B_MD	ERV1	LTR	0.917199	0.953236	4.57619	0.717049	0.997806
LTR4_Str	ERVK	LTR	0.434953	0.44645	5.51948	0.800005	0.997806
LTR-522_AMi	Gypsy	LTR	4.84911	5.17345	4.84884	0.0493495	0.997806
LTR-57C_Gav	Gypsy	LTR	-0.17194	-0.178542	4.75781	0.939559	0.997806
LTR5B	ERVK	LTR	0.744083	0.766663	5.90568	0.662638	0.997806
LTR-67_Gav	Gypsy	LTR	-0.237692	-0.238058	8.77612	0.785411	0.997806
LTR-83_Gav	ERV1	LTR	-2.78172	-2.81587	5.86402	0.11667	0.997806
LTR93_MD	ERVK	LTR	-1.05109	-1.05398	8.10053	0.369912	0.997806
LTRX1-I_XT	Copia	LTR	-0.585416	-0.586018	8.8802	0.562056	0.997806
MamGyp-int	Gypsy	LTR	0.37547	0.377383	7.1402	0.832526	0.997806
Mariner-101_HSal	DNA	DNA	-1.61083	-1.75398	4.23529	0.612482	0.997806
Mariner-10_DR	TcMar-Tc1	DNA	-0.491921	-0.496916	5.43616	0.79011	0.997806
Mariner-10_DRh	TcMar-Tc1	DNA	0.951691	0.95204	10.3331	0.293125	0.997806
Mariner-11_DR	TcMar-Tc1	DNA	0.619803	0.623212	6.72123	0.690538	0.997806
Mariner-11_SIn	DNA	DNA	0.690625	0.698828	5.91896	0.74584	0.997806
Mariner-13_SIn	DNA	DNA	1.69486	1.75663	4.77257	0.50347	0.997806
Mariner-14_LCh	DNA	DNA	2.50891	2.52612	6.50508	0.118536	0.997806
Mariner-14_SIn	DNA	DNA	0.604391	0.611746	5.5666	0.761227	0.997806
Mariner-15_SIn	DNA	DNA	0.407837	0.408739	8.00076	0.694575	0.997806
Mariner-16_SIn	DNA	DNA	0.742766	0.746577	6.60865	0.664915	0.997806
Mariner-17_AEc	DNA	DNA	0.690859	0.692958	7.49078	0.47895	0.997806
Mariner-18_HSal	DNA	DNA	0.307548	0.307661	8.84284	0.702579	0.997806
Mariner-18_SIn	DNA	DNA	3.08863	3.15056	5.31106	0.0702744	0.997806
Mariner-19_HSal	DNA	DNA	-1.87003	-2.22111	4.36547	0.44936	0.997806
Mariner-1_DR	TcMar-Tc1	DNA	-0.155072	-0.155182	9.23938	0.833973	0.997806
Mariner-1_OL	TcMar-ISRm11	DNA	-0.790775	-0.800635	5.90216	0.591174	0.997806
Mariner-21N3_CGi	TcMar-m44	DNA	0.984243	0.99829	5.44313	0.676089	0.997806
Mariner-21_SIn	DNA	DNA	-0.649428	-0.651505	7.54534	0.592483	0.997806
Mariner-23_AEc	DNA	DNA	-0.86061	-0.887256	4.70627	0.738999	0.997806
Mariner-23_LCh	DNA	DNA	-0.724238	-0.737887	5.23872	0.725054	0.997806
Mariner-24_HM	TcMar-Fot1	DNA	-6.89403	-1.44269e+08	4.16739	0.0215594	0.997806
Mariner-26_SM	TcMar-Tigger	DNA	-0.3762	-0.377183	6.81241	0.760245	0.997806
Mariner-28_HM	TcMar-Fot1	DNA	-3.96447	-4.10357	4.67078	0.0651781	0.997806
Mariner-29_AEc	DNA	DNA	0.895181	0.906292	5.60212	0.596543	0.997806
Mariner-29_HM	TcMar-Fot1	DNA	-0.559737	-0.601913	4.75697	0.839272	0.997806
Mariner-2_DR	TcMar-Tc1	DNA	-1.78606	-1.84807	4.96917	0.439989	0.997806
Mariner-2_GA	TcMar-ISRm11	DNA	0.535739	0.536689	8.38268	0.540981	0.997806
Mariner-2_HM	TcMar-Fot1	DNA	0.434813	0.435165	8.09561	0.705835	0.997806
Mariner-30_HM	TcMar-Fot1	DNA	0.035585	0.0356533	7.18082	0.973112	0.997806
Mariner-31_HM	TcMar-Fot1	DNA	0.0879443	0.0844889	5.86683	0.968956	0.997806
Mariner-34_SM	TcMar-Pogo	DNA	-0.55772	-0.58187	4.81356	0.837322	0.997806
Mariner-38B_SIn	DNA	DNA	0.956112	0.983217	5.55166	0.688807	0.997806
Mariner-39_HM	TcMar-Fot1	DNA	-1.4749	-1.49706	5.58948	0.433663	0.997806
Mariner-3_DR	TcMar-ISRm11	DNA	3.04604	3.07252	6.20972	0.104066	0.997806
Mariner-3_GA	TcMar-ISRm11	DNA	-0.886992	-0.952101	5.25597	0.637151	0.997806
Mariner-3_NV	TcMar-ISRm11	DNA	-0.60803	-0.620458	4.97942	0.793876	0.997806
Mariner-3_OL	TcMar-ISRm11	DNA	-0.644853	-0.649975	6.02034	0.640181	0.997806
Mariner-4_DR	TcMar-Tc1	DNA	0.107186	0.107205	11.3652	0.860831	0.997806
Mariner-52_HSal	DNA	DNA	0.0668502	0.0668772	9.78417	0.923959	0.997806
Mariner-52N1_HSal	DNA	DNA	0.429314	0.434022	5.60475	0.794882	0.997806
Mariner5_CB	TcMar-Mariner	DNA	0.370297	0.376346	6.63724	0.864951	0.997806
Mariner-5_Crp	TcMar-Mariner	DNA	0.391662	0.392291	8.38579	0.676128	0.997806
Mariner-5_GA	TcMar-ISRm11	DNA	2.31167	2.33279	6.20899	0.138039	0.997806
Mariner-5_SIn	DNA	DNA	-0.631223	-0.633877	5.33661	0.738125	0.997806
Mariner-5_XT	TcMar-Tc2	DNA	0.673387	0.676159	7.1017	0.501507	0.997806
Mariner-62_HSal	DNA	DNA	0.484338	0.48478	9.08417	0.503229	0.997806
Mariner-68_HSal	DNA	DNA	-0.150274	-0.150329	9.55608	0.868853	0.997806
Mariner-6_DF	TcMar-Mariner	DNA	2.49135	2.50244	7.00118	0.131308	0.997806
Mariner-6_DR	TcMar-Tc1	DNA	-0.205557	-0.205833	8.51282	0.810081	0.997806
Mariner-6_XT	TcMar-Tc2	DNA	3.50188	1.44269e+08	4.39709	0.198571	0.997806
Mariner-79B_HSal	DNA	DNA	-0.925386	-0.928282	7.52522	0.302144	0.997806
Mariner-79_HSal	DNA	DNA	-0.493314	-0.495276	7.10504	0.670496	0.997806
Mariner-7_XT	DNA	DNA	-0.889099	-0.907744	5.85789	0.65488	0.997806
Mariner-801_AMi	TcMar-Tigger	DNA	-4.60467	-4.89491	4.45004	0.088289	0.997806
Mariner-8_LCh	DNA	DNA	0.066753	0.067654	5.99554	0.962804	0.997806
Mariner-91_HSal	DNA	DNA	-0.620477	-0.692547	4.75598	0.779796	0.997806
Mariner-9_DR	TcMar-Tc1	DNA	-0.111958	-0.112183	8.77725	0.890522	0.997806
Mariner-N10_DR	TcMar-Tc2	DNA	1.8236	1.86007	6.04601	0.269163	0.997806
Mariner-N11_DR	TcMar-Fot1	DNA	-1.65287	-1.68092	5.0906	0.288158	0.997806
Mariner-N12_DR	TcMar-Tc1	DNA	0.649257	0.650548	7.59738	0.608135	0.997806
Mariner-N13_DR	TcMar-Tc1	DNA	-0.127891	-0.127907	11.86	0.823421	0.997806
Mariner-N13_HSal	DNA	DNA	-0.510185	-0.510892	7.50354	0.655847	0.997806
Mariner-N14_DR	TcMar-Tigger	DNA	-0.986083	-0.988541	7.65842	0.319867	0.997806
Mariner-N27_HSal	DNA	DNA	-0.642532	-0.642913	9.71956	0.437748	0.997806
Mariner-N2_DR	TcMar	DNA	-1.73715	-1.77706	4.71998	0.478564	0.997806
Mariner-N3_CFl	DNA	DNA	2.81173	2.85648	5.17381	0.272807	0.997806
Mariner-N3_DR	CMC-EnSpm	DNA	-0.199034	-0.183316	4.8013	0.956005	0.997806
Mariner-N5_HSal	DNA	DNA	0.0383759	0.0541816	5.45364	0.977534	0.997806
Maui	L2	LINE	0.119299	0.119306	12.7767	0.818578	0.997806
Mdo2LTR2b-int	ERV1	LTR	1.42262	1.48869	4.65474	0.562852	0.997806
MdoERV2-int	ERV1	LTR	0.314953	0.31551	8.09212	0.752775	0.997806
MER31-int	ERV1	LTR	-3.68245	-1.44269e+08	4.44723	0.133001	0.997806
MER4-int	ERV1	LTR	0.948554	0.956078	6.35562	0.46636	0.997806
MER6	TcMar-Tigger	DNA	0.615276	0.61714	7.68801	0.512232	0.997806
MER6A	TcMar-Tigger	DNA	-1.77187	-1.78549	6.39517	0.228633	0.997806
Merlin-1_DR	Merlin	DNA	-0.242529	-0.242704	9.86316	0.747287	0.997806
Mf3_MF	Unknown	Unknown	-1.40697	-1.42002	5.60791	0.457719	0.997806
MinoAg1	R1	LINE	1.58021	1.59914	5.63362	0.402561	0.997806
MIRAGE1	CMC-Mirage	DNA	0.240434	0.238771	5.04633	0.923754	0.997806
MIR_Aves1	MIR	SINE	-1.51224	-1.52826	5.78826	0.309909	0.997806
MLT1X6_LA	ERVL-MaLR	LTR	-1.80465	-1.81834	5.88748	0.335689	0.997806
MMERVK9C_I-int	ERVK	LTR	0.754472	0.765799	5.49839	0.68603	0.997806
MMERVK9E_I-int	ERVK	LTR	0.616549	0.631929	4.30447	0.841146	0.997806
MMSAT4	Satellite	Satellite	-0.389882	-0.393639	5.87181	0.811399	0.997806
MonoRep204	Segmental	Segmental	2.96638	3.07516	4.41922	0.250138	0.997806
Mothra_OL	TcMar-Tc1	DNA	-2.5646	-2.59612	5.67485	0.144568	0.997806
MRE1_OL	Unknown	Unknown	-0.923182	-0.933588	5.65036	0.574895	0.997806
MuDr-1_BF	MULE-NOF	DNA	-0.826845	-0.850408	4.58358	0.712957	0.997806
MuDR-1_DR	MULE-NOF	DNA	0.0424657	0.042215	6.59213	0.976456	0.997806
MuDR-1_NV	MULE-MuDR	DNA	-1.1317	-1.14956	5.8022	0.565211	0.997806
MuDr-1x_AP	MULE-MuDR	DNA	1.42304	1.43099	6.63486	0.341501	0.997806
MuDr-1x_SP	MULE-MuDR	DNA	-0.758942	-0.757756	5.59588	0.68563	0.997806
MuDr-3_HM	MULE-MuDR	DNA	0.876313	0.890682	5.25915	0.629841	0.997806
MurERV4_19-int	ERVK	LTR	0.550719	0.665636	4.56997	0.817931	0.997806
Nematis_Cr	Penelope	LINE	-3.5284	-3.65124	4.47255	0.118252	0.997806
Neptune_Hyd	Penelope	LINE	-2.06996	-2.08624	6.93839	0.108459	0.997806
Ngaro1_DR	Ngaro	LTR	-0.599899	-0.608782	6.08219	0.774912	0.997806
Nimb-12_DR	I	LINE	-2.41815	-2.50246	4.77428	0.339281	0.997806
Nimb-14_DR	I	LINE	0.966078	0.969718	7.04002	0.412478	0.997806
Nimb-15_DR	I	LINE	1.2143	1.2299	5.4741	0.439696	0.997806
Nimb-16_DR	I	LINE	-0.571701	-0.576548	5.67794	0.751849	0.997806
Nimb-1_DR	I	LINE	-0.178009	-0.180985	7.19623	0.865174	0.997806
Nimb-4_DR	I	LINE	1.3833	1.39992	5.59502	0.55116	0.997806
Nimb-8_DR	I	LINE	-0.779922	-0.789983	5.45261	0.641162	0.997806
Nimb-9_DR	I	LINE	6.99281	7.51105	4.61157	0.0470453	0.997806
NonLTR-1C_DR	Retroposon	Retroposon	-1.59611	-1.61207	5.99236	0.341036	0.997806
NonLTR-1_DR	Retroposon	Retroposon	-1.19462	-1.22151	5.06309	0.617623	0.997806
ONSATB	Satellite	Satellite	0.256945	0.287602	5.58765	0.866441	0.997806
OSSINE1	5S-Deu-L2	SINE	-0.627199	-0.635657	4.98066	0.789222	0.997806
Outcast-1_DAn	Jockey	LINE	0.105901	0.112121	5.95154	0.948279	0.997806
P-11_HM	P	DNA	-1.97982	-2.09307	4.57262	0.407806	0.997806
P-24_HM	P	DNA	-2.9611	-2.99985	5.80841	0.0948668	0.997806
P-26_HM	P	DNA	-2.57904	-3.01971	4.36761	0.395539	0.997806
P-27_HM	P	DNA	1.02757	1.0289	8.22913	0.563027	0.997806
P-29_HM	P	DNA	-0.737803	-0.738516	7.31533	0.58878	0.997806
P-30_HM	P	DNA	-0.334784	-0.338974	5.87777	0.856231	0.997806
P-35_HM	P	DNA	0.696612	0.699668	6.65117	0.603875	0.997806
P_DB	P	DNA	-0.192984	-0.177209	4.59738	0.938356	0.997806
Penelope-13_HM	Penelope	LINE	-0.558821	-0.559558	8.59585	0.51513	0.997806
Penelope-1_AFC	Penelope	LINE	0.133615	0.133627	12.299	0.789805	0.997806
Penelope-1_DR	Penelope	LINE	-1.15603	-1.17297	5.82858	0.56763	0.997806
Penelope1D_XT	Penelope	LINE	-1.227	-1.24608	5.47394	0.446643	0.997806
Penelope-1_Gav	Penelope	LINE	-1.57865	-1.61628	4.95586	0.479935	0.997806
Penelope-1_SIn	LINE	LINE	-0.0684499	-0.0785608	5.00522	0.976243	0.997806
Penelope-5_XT	Penelope	LINE	-0.24879	-0.249001	9.11122	0.758351	0.997806
Penelope-6_XT	Penelope	LINE	-2.57687	-2.61946	5.55712	0.250258	0.997806
Penelope_Ele2	Penelope	LINE	1.03885	1.06978	5.06873	0.721302	0.997806
Perere-3	RTE	LINE	4.4365	4.83821	4.4805	0.058406	0.997806
piggyBac-1_BF	PiggyBac	DNA	1.23568	1.23766	8.21693	0.199197	0.997806
piggyBac-1_DR	PiggyBac	DNA	-0.119077	-0.119461	8.13317	0.888421	0.997806
piggyBac-2_XT	PiggyBac	DNA	0.71032	0.712334	7.44268	0.580738	0.997806
piggyBac-4_CGi	PiggyBac	DNA	-8.52563	-1.44269e+08	4.11304	0.0231948	0.997806
piggyBac-8_SM	PiggyBac	DNA	0.143558	0.0908183	4.59191	0.976178	0.997806
piggyBac-N11_DR	PiggyBac	DNA	2.20992	2.23944	5.6655	0.188536	0.997806
piggyBac-N12_DR	PiggyBac	DNA	0.682594	0.683956	7.88791	0.542667	0.997806
piggyBac-N5_DR	PiggyBac	DNA	5.9415	6.48285	4.99205	0.00864154	0.997806
piggyBac-N6_DR	PiggyBac	DNA	-0.224176	-0.225914	6.34886	0.880383	0.997806
PIGGYB_SM	PiggyBac	DNA	-0.514408	-0.521051	5.38496	0.824417	0.997806
Pigibakku	PiggyBac	DNA	1.32406	1.32815	7.29042	0.227705	0.997806
Polinton-1_AMi	Maverick	DNA	-1.96579	-2.07775	4.03314	0.496901	0.997806
Polinton-1_CGi	Maverick	DNA	-2.64299	-2.8425	4.67693	0.232003	0.997806
Polinton-1_DAn	Maverick	DNA	-6.30659	-6.57546	5.24158	0.0062566	0.997806
Polinton-1_DR	Maverick	DNA	0.394843	0.395124	9.37992	0.576594	0.997806
Polinton-1_LCh	DNA	DNA	-1.3539	-1.36272	6.44451	0.409673	0.997806
Polinton-1N1_DR	Maverick	DNA	2.13534	2.14647	6.69919	0.140778	0.997806
Polinton-1_PBa	DNA	DNA	1.11576	1.14952	4.48636	0.663187	0.997806
Polinton-1_SP	Maverick	DNA	-0.655715	-0.657184	7.75212	0.467501	0.997806
Polinton-1_SPU	Maverick	DNA	1.14211	1.16312	5.00424	0.623837	0.997806
Polinton-2_AMi	Maverick	DNA	0.7932	0.806607	5.62971	0.653885	0.997806
Polinton-2A_NV	Maverick	DNA	0.304567	0.304914	7.3962	0.75626	0.997806
Polinton-2_DR	Maverick	DNA	1.23677	1.25412	5.55559	0.475522	0.997806
Polinton-2_HM	Maverick	DNA	-0.80576	-0.808326	8.04637	0.349596	0.997806
Polinton-2_NV	Maverick	DNA	-2.23314	-2.27214	5.45598	0.321586	0.997806
Polinton-2_PBa	DNA	DNA	-0.911638	-0.915231	7.04563	0.42852	0.997806
Polinton-3_HM	Maverick	DNA	-2.34727	-2.39225	5.15181	0.291232	0.997806
Polinton-3_NV	Maverick	DNA	3.2442	3.30284	5.15969	0.0760278	0.997806
Polinton-3_TC	Maverick	DNA	3.88718	3.96064	5.86527	0.0463349	0.997806
Polinton-4_NV	Maverick	DNA	4.8276	4.88138	6.51211	0.00431387	0.997806
Polinton-5_NV	Maverick	DNA	-0.664389	-0.655772	4.99908	0.788557	0.997806
Polinton-5_NVi	Maverick	DNA	-1.18281	-1.18299	11.5809	0.277012	0.997806
Polinton-7_NVi	Maverick	DNA	1.02229	1.03233	6.16713	0.555637	0.997806
Polinton-9_NVi	Maverick	DNA	-1.53593	-1.54639	6.63891	0.218749	0.997806
PRIMA4-int	ERV1	LTR	-2.7304	-2.78115	5.33198	0.24881	0.997806
Proto2-7_CS1	Proto2	LINE	0.384935	0.387441	6.19214	0.800624	0.997806
R1-2_DEl	R1	LINE	-1.69419	-1.73104	5.9101	0.287476	0.997806
R1-4_DWi	R1	LINE	3.24278	3.27363	6.12584	0.0217584	0.997806
R1-5_BM	R1	LINE	0.920541	0.931101	5.80088	0.551267	0.997806
R1_DYa	R1	LINE	-0.249351	-0.249482	9.81708	0.804843	0.997806
R7Ag2	R1	LINE	1.26254	1.27899	5.3822	0.468091	0.997806
RC123	Satellite	Satellite	4.35086	4.77825	4.39933	0.140802	0.997806
Rehavkus-2_NVi	MULE-NOF	DNA	-2.1128	-2.12328	6.9095	0.0977271	0.997806
REP131	DNA	DNA	1.94788	2.00883	4.48094	0.39364	0.997806
REP-4_CQ	Unknown	Unknown	4.34285	4.59604	4.61913	0.164	0.997806
REP-4_PBa	Unknown	Unknown	0.191379	0.191428	10.7252	0.755335	0.997806
REP-6_CPB	Unknown	Unknown	-0.777455	-0.781096	6.43148	0.647068	0.997806
Rex1-1_ACar	Rex-Babar	LINE	-0.0797031	-0.0808877	6.19605	0.963651	0.997806
REX1-1_AFC	Rex-Babar	LINE	0.0162638	0.016263	10.4878	0.976525	0.997806
Rex1-1B_FR	Rex-Babar	LINE	-0.0175346	-0.0174663	8.65521	0.982993	0.997806
REX1-1_DR	Rex-Babar	LINE	0.758441	0.76095	7.31174	0.421519	0.997806
Rex1-1_FR	Rex-Babar	LINE	0.857807	0.859709	7.77225	0.346904	0.997806
REX1-1_GA	Rex-Babar	LINE	1.55093	1.56174	6.57563	0.224653	0.997806
Rex1-1_PM	Rex-Babar	LINE	0.858679	0.859352	9.29108	0.216135	0.997806
REX1-1_XT	Rex-Babar	LINE	-0.760268	-0.760499	10.6663	0.244913	0.997806
Rex1-21_DRe	Rex-Babar	LINE	-0.322847	-0.32504	7.15008	0.738339	0.997806
Rex1-26_DRe	Rex-Babar	LINE	-0.340237	-0.342481	6.58089	0.799373	0.997806
Rex1-29_DRe	Rex-Babar	LINE	-0.919749	-0.938378	5.44309	0.676213	0.997806
REX1-2_AFC	Rex-Babar	LINE	0.162465	0.16255	10.3344	0.778059	0.997806
REX1-2_DR	Rex-Babar	LINE	-2.11522	-2.16358	5.10188	0.27282	0.997806
Rex1-2_FR	Rex-Babar	LINE	0.256057	0.256975	6.96592	0.794155	0.997806
Rex1-2_PM	Rex-Babar	LINE	1.85968	1.88129	5.65627	0.334196	0.997806
REX1-2_XT	Rex-Babar	LINE	-0.0811267	-0.0812946	7.97926	0.929548	0.997806
Rex1-31_DRe	Rex-Babar	LINE	0.38507	0.385371	9.29264	0.588543	0.997806
REX1-3_AFC	Rex-Babar	LINE	-0.108303	-0.108329	10.7875	0.850698	0.997806
Rex1-3_FR	Rex-Babar	LINE	0.687297	0.689897	8.054	0.462438	0.997806
REX1-3_XT	Rex-Babar	LINE	-0.290317	-0.291859	5.18155	0.873659	0.997806
Rex1-40_DRe	Rex-Babar	LINE	-0.275567	-0.276178	7.56805	0.780295	0.997806
REX1-4_AFC	Rex-Babar	LINE	-0.0684348	-0.0684521	10.4732	0.909573	0.997806
REX1-4_DR	Rex-Babar	LINE	-0.135483	-0.138258	7.38882	0.903451	0.997806
REX1-4_XT	Rex-Babar	LINE	-1.28793	-1.30591	5.91606	0.375205	0.997806
Rex1-52_DR	Rex-Babar	LINE	-2.55443	-2.57731	6.34397	0.180753	0.997806
REX1-5_DR	Rex-Babar	LINE	-0.172426	-0.173753	5.72527	0.91085	0.997806
REX1-5_XT	Rex-Babar	LINE	-1.31185	-1.32022	6.78378	0.38308	0.997806
Rex1-6_DR	Rex-Babar	LINE	2.01922	2.03978	8.67252	0.270681	0.997806
REX1-6_XT	Rex-Babar	LINE	0.205138	0.205727	7.47096	0.833477	0.997806
REX1-7_DR	Rex-Babar	LINE	-0.36536	-0.367	6.25241	0.767673	0.997806
REX1-7_XT	Rex-Babar	LINE	-0.0713446	-0.0715731	6.7201	0.957405	0.997806
REX1-9_DR	Rex-Babar	LINE	-1.26493	-1.27022	7.74833	0.307176	0.997806
REX1_CY	Rex-Babar	LINE	-0.0301867	-0.0367243	5.70182	0.980881	0.997806
Rex1_FurC	Rex-Babar	LINE	0.0317265	0.0317451	9.45169	0.962807	0.997806
REX3_XM	RTE	LINE	0.540919	0.541893	8.51857	0.50604	0.997806
REX5	L2	LINE	0.999561	1.00612	6.82306	0.476909	0.997806
RLTR14-int	ERV1	LTR	1.52892	1.5344	7.39769	0.223105	0.997806
RLTR19-int	ERVK	LTR	-0.907332	-0.914294	6.25652	0.497779	0.997806
RLTR20A4	ERVK	LTR	1.22059	1.22238	8.39462	0.109671	0.997806
RLTR20C1_MM	ERVK	LTR	0.230227	0.231298	7.33931	0.844797	0.997806
RLTR20C2_MM	ERVK	LTR	0.546429	0.556784	5.49796	0.731222	0.997806
RLTR32_Rn	ERVK	LTR	0.11598	0.115996	10.7135	0.856319	0.997806
RLTR51A_Mm	ERVK	LTR	0.232906	0.295134	4.83951	0.906778	0.997806
RLTR9A3A	ERVK	LTR	0.80725	0.838456	4.63371	0.754448	0.997806
AlRepA-102	TcMar-Tc1	DNA	-0.261045	-0.261054	13.803	0.549193	0.997806
AlRepA-115	DNA	DNA	-0.220133	-0.220146	13.1361	0.677215	0.997806
AlRepA-125	PiggyBac	DNA	-0.721476	-0.721605	11.3813	0.265223	0.997806
AlRepA-208	hAT-Charlie	DNA	0.441309	0.441415	11.1407	0.564814	0.997806
AlRepA-21	L2	LINE	-0.0620593	-0.0620744	11.1656	0.914523	0.997806
AlRepA-24	MIR	SINE	0.408022	0.408056	12.5984	0.478775	0.997806
AlRepA-297	Unknown	Unknown	0.489743	0.489895	10.5623	0.411341	0.997806
AlRepA-386	Ngaro	LTR	0.45549	0.45554	12.0728	0.372724	0.997806
AlRepA-4	hAT-Charlie	DNA	-0.475308	-0.47534	12.765	0.330168	0.997806
AlRepA-485	tRNA-Core	SINE	-0.211823	-0.21187	10.6485	0.721117	0.997806
AlRepA-51	Unknown	Unknown	0.0167678	0.0167684	13.8079	0.972888	0.997806
AlRepA-66	hAT-Ac	DNA	-0.925306	-0.925701	10.1806	0.133318	0.997806
AlRepA-93	L2	LINE	0.174083	0.174096	12.6399	0.729311	0.997806
AlRepB-103	RTE-BovB	LINE	-0.33102	-0.331043	12.7102	0.482528	0.997806
AlRepB-11	DNA	DNA	0.185668	0.185703	11.3309	0.757374	0.997806
AlRepB-112	Unknown	Unknown	-0.260083	-0.260107	12.3293	0.595268	0.997806
AlRepB-124	DNA	DNA	0.530549	0.530662	11.116	0.381111	0.997806
AlRepB-126	hAT-Ac	DNA	0.0579165	0.057956	10.8039	0.926592	0.997806
AlRepB-127	DNA	DNA	-0.894834	-0.894949	11.7599	0.142992	0.997806
AlRepB-128	Unknown	Unknown	-0.0215838	-0.0215945	10.8867	0.973944	0.997806
AlRepB-13	Ngaro	LTR	-0.270363	-0.270422	11.0951	0.639023	0.997806
AlRepB-136	Unknown	Unknown	-0.714724	-0.715598	8.27918	0.461734	0.997806
AlRepB-14	Rex-Babar	LINE	-0.41826	-0.418683	8.64834	0.60123	0.997806
AlRepB-148	Unknown	Unknown	0.0379432	0.037941	8.425	0.960882	0.997806
AlRepB-157	Satellite	Satellite	2.69973	2.73682	5.47362	0.236234	0.997806
AlRepB-160	L2	LINE	-0.0536394	-0.0536384	10.8031	0.933739	0.997806
AlRepB-161	RTE-BovB	LINE	0.224326	0.224437	9.87603	0.732209	0.997806
AlRepB-1625	Unknown	Unknown	-0.603752	-0.605876	7.19896	0.590968	0.997806
AlRepB-173	Retroposon	Retroposon	0.0457778	0.0457848	11.6582	0.938511	0.997806
AlRepB-180	hAT-Ac	DNA	0.627706	0.627786	11.8721	0.250217	0.997806
AlRepB-185	DNA	DNA	0.398166	0.398387	9.71053	0.52392	0.997806
AlRepB-193	Penelope	LINE	-0.0603559	-0.0603573	13.6522	0.910478	0.997806
AlRepB-2	hAT-Ac	DNA	0.793537	0.794045	9.48359	0.220551	0.997806
AlRepB-200	Unknown	Unknown	0.254951	0.255021	10.6064	0.670329	0.997806
AlRepB-221	Unknown	Unknown	-0.808186	-0.808619	9.81389	0.264259	0.997806
AlRepB-234	PiggyBac	DNA	0.124312	0.124362	10.2081	0.829771	0.997806
AlRepB-250	DNA	DNA	-0.514176	-0.51436	10.3744	0.43144	0.997806
AlRepB-26	L2	LINE	-0.155334	-0.155347	12.197	0.786632	0.997806
AlRepB-269	Unknown	Unknown	-0.190788	-0.190871	10.0716	0.779944	0.997806
AlRepB-304	Unknown	Unknown	-0.0107882	-0.0107903	10.9844	0.986808	0.997806
AlRepB-351	TcMar-Tc1	DNA	0.240798	0.240844	11.3711	0.666526	0.997806
AlRepB-356	Unknown	Unknown	0.150269	0.15034	9.77898	0.824286	0.997806
AlRepB-365	Unknown	Unknown	-0.558874	-0.560083	7.80603	0.521779	0.997806
AlRepB-383	TcMar-Tc1	DNA	0.977236	0.980326	7.63202	0.254886	0.997806
AlRepB-392	hAT-Charlie	DNA	0.343645	0.343936	9.38102	0.601895	0.997806
AlRepB-420	Unknown	Unknown	0.219188	0.219234	11.4021	0.720557	0.997806
AlRepB-429	hAT-Ac	DNA	1.01781	1.01863	9.23319	0.144093	0.997806
AlRepB-438	hAT-Charlie	DNA	-0.245256	-0.245308	11.1707	0.671381	0.997806
AlRepB-44	TcMar-Tc1	DNA	-1.4631	-1.46324	12.4095	0.0625392	0.997806
AlRepB-45	SINE	SINE	-0.512483	-0.512887	9.41278	0.452362	0.997806
AlRepB-473	hAT	DNA	-0.577606	-0.579336	7.45556	0.603208	0.997806
AlRepB-517	TcMar-Tc1	DNA	0.284792	0.284841	11.4259	0.611238	0.997806
AlRepB-569	Unknown	Unknown	0.554972	0.555032	12.1032	0.377829	0.997806
AlRepB-59	hAT-Tip100	DNA	0.540806	0.541414	8.39373	0.551212	0.997806
AlRepB-60	DNA	DNA	0.308944	0.309056	10.3652	0.620824	0.997806
AlRepB-65	Unknown	Unknown	-0.056859	-0.0568844	9.92945	0.923608	0.997806
AlRepB-727	hAT-Ac	DNA	0.206493	0.206579	10.2735	0.73323	0.997806
AlRepB-731	TcMar-Tc2	DNA	0.0762186	0.0762353	11.0315	0.896037	0.997806
AlRepB-738	hAT-Ac	DNA	0.29063	0.290648	12.9058	0.649654	0.997806
AlRepB-767	Unknown	Unknown	0.550576	0.551649	8.00524	0.593879	0.997806
AlRepB-773	hAT-Charlie	DNA	0.209314	0.20952	9.25862	0.756644	0.997806
AlRepB-784	hAT-Ac	DNA	0.330478	0.330534	11.4584	0.562264	0.997806
AlRepB-923	hAT-Charlie	DNA	-0.508792	-0.509054	9.84771	0.448052	0.997806
AlRepB-964	hAT-Tip100	DNA	0.275546	0.275613	11.0773	0.619386	0.997806
AlRepB-99	hAT	DNA	0.484678	0.484821	10.6557	0.451201	0.997806
AlRepC-102	TcMar-Tc1	DNA	0.208335	0.208266	7.24312	0.8706	0.997806
AlRepC-1020	Unknown	Unknown	1.8824	1.89609	6.37126	0.178067	0.997806
AlRepC-1023	DNA	DNA	-0.241587	-0.241797	9.60413	0.748932	0.997806
AlRepC-1033	PIF-Harbinger	DNA	-0.0567452	-0.0569275	9.528	0.949249	0.997806
AlRepC-1036	Unknown	Unknown	-0.904589	-0.904832	10.7848	0.269496	0.997806
AlRepC-1068	hAT-Tip100	DNA	0.92314	0.926632	6.97319	0.460414	0.997806
AlRepC-1083	hAT-Tip100	DNA	-0.20494	-0.205075	9.49271	0.750615	0.997806
AlRepC-1084	Rex-Babar	LINE	-0.271086	-0.271801	7.40856	0.826492	0.997806
AlRepC-1114	CMC-EnSpm	DNA	-0.153171	-0.153297	9.7779	0.828509	0.997806
AlRepC-1119	hAT-Charlie	DNA	-0.52916	-0.529842	8.54934	0.517107	0.997806
AlRepC-1121	Unknown	Unknown	1.70482	1.70619	9.34801	0.158987	0.997806
AlRepC-1154	RTE-BovB	LINE	0.794806	0.794954	11.3172	0.219223	0.997806
AlRepC-1227	Unknown	Unknown	-0.0235736	-0.0235752	12.4861	0.970019	0.997806
AlRepC-1250	Unknown	Unknown	0.432417	0.432978	8.67704	0.531611	0.997806
AlRepC-1255	PiggyBac	DNA	0.667776	0.668237	9.53309	0.31607	0.997806
AlRepC-1270	Unknown	Unknown	1.31471	1.32018	6.89883	0.366016	0.997806
AlRepC-128	hAT	DNA	0.0189388	0.0189419	10.791	0.973838	0.997806
AlRepC-1280	PIF-Harbinger	DNA	1.75238	1.77093	6.52996	0.163949	0.997806
AlRepC-1282	hAT	DNA	-1.14064	-1.14733	6.61653	0.292547	0.997806
AlRepC-1285	Unknown	Unknown	1.30932	1.3114	8.43206	0.0978309	0.997806
AlRepC-1286	hAT-Ac	DNA	0.740091	0.741466	7.90542	0.426482	0.997806
AlRepC-1293	Unknown	Unknown	0.554651	0.557009	7.37022	0.602575	0.997806
AlRepC-1298	Unknown	Unknown	0.405353	0.405638	9.53631	0.615865	0.997806
AlRepC-13	Rex-Babar	LINE	0.577487	0.577771	10.0201	0.339839	0.997806
AlRepC-1303	Unknown	Unknown	1.24471	1.24803	7.58826	0.2779	0.997806
AlRepC-132	DNA	DNA	-1.11761	-1.13146	5.47478	0.542131	0.997806
AlRepC-1351	hAT-Ac	DNA	0.83903	0.8412	7.53153	0.506594	0.997806
AlRepC-136	hAT-Ac	DNA	0.575091	0.575956	8.42791	0.512725	0.997806
AlRepC-1388	Unknown	Unknown	0.282924	0.283087	9.40727	0.70568	0.997806
AlRepC-14	Unknown	Unknown	-0.175173	-0.175511	8.00876	0.852934	0.997806
AlRepC-1412	Unknown	Unknown	-0.219023	-0.21908	10.8169	0.700575	0.997806
AlRepC-143	Unknown	Unknown	-0.0950865	-0.0951164	11.0772	0.879459	0.997806
AlRepC-1432	Unknown	Unknown	1.66001	1.66586	7.10598	0.142403	0.997806
AlRepC-1433	hAT-Charlie	DNA	-0.156439	-0.156673	8.26582	0.860909	0.997806
AlRepC-144	Penelope	LINE	0.623709	0.62507	7.8905	0.580096	0.997806
AlRepC-1442	hAT-Ac	DNA	-0.553706	-0.555315	7.66908	0.61838	0.997806
AlRepC-146	hAT-Ac	DNA	-0.168348	-0.168401	10.5278	0.797515	0.997806
AlRepC-1508	hAT-Charlie	DNA	1.03174	1.03244	9.41042	0.148048	0.997806
AlRepC-1543	IS3EU	DNA	-0.607823	-0.608064	10.3974	0.391634	0.997806
AlRepC-1547	L2	LINE	0.190259	0.190992	7.1513	0.856845	0.997806
AlRepC-1568	Unknown	Unknown	1.07939	1.08035	9.10088	0.255719	0.997806
AlRepC-1574	Unknown	Unknown	1.47522	1.48013	7.47159	0.204111	0.997806
AlRepC-1586	Unknown	Unknown	-0.235451	-0.235475	11.8848	0.716004	0.997806
AlRepC-159	L2	LINE	0.532949	0.533533	8.75532	0.52695	0.997806
AlRepC-160	hAT-Ac	DNA	-0.661001	-0.663604	7.28329	0.486514	0.997806
AlRepC-162	MIR	SINE	0.714164	0.714341	10.9779	0.343044	0.997806
AlRepC-1638	Unknown	Unknown	-1.25856	-1.26512	6.60992	0.361499	0.997806
AlRepC-1646	hAT	DNA	1.91539	1.92078	7.59067	0.144945	0.997806
AlRepC-1672	hAT-Ac	DNA	0.173856	0.173953	8.89235	0.842659	0.997806
AlRepC-169	Unknown	Unknown	-2.59593	-2.63509	5.5137	0.202213	0.997806
AlRepC-17	Unknown	Unknown	-0.0692569	-0.0692616	12.8518	0.895177	0.997806
AlRepC-1720	Unknown	Unknown	3.05135	3.08051	6.16312	0.111778	0.997806
AlRepC-1745	CMC-EnSpm	DNA	0.0328422	0.0329166	8.07593	0.968542	0.997806
AlRepC-18	hAT	DNA	-0.279228	-0.279535	8.71691	0.707154	0.997806
AlRepC-1805	rRNA	rRNA	-2.39237	-2.4468	4.92932	0.360173	0.997806
AlRepC-1837	L2	LINE	0.330115	0.330189	11.0146	0.555573	0.997806
AlRepC-1878	DNA	DNA	-0.57709	-0.577207	11.2197	0.39779	0.997806
AlRepC-1885	hAT	DNA	0.513854	0.51534	7.46232	0.63963	0.997806
AlRepC-190	DNA	DNA	0.945811	0.950191	7.5791	0.406663	0.997806
AlRepC-1946	Unknown	Unknown	-0.199385	-0.199579	8.81408	0.81981	0.997806
AlRepC-195	Unknown	Unknown	-0.330651	-0.330971	8.91761	0.658113	0.997806
AlRepC-1957	RTE-BovB	LINE	-0.625389	-0.625902	9.67235	0.440715	0.997806
AlRepC-20	hAT-Charlie	DNA	-0.726476	-0.727404	8.68041	0.340244	0.997806
AlRepC-212	Unknown	Unknown	-0.821041	-0.821979	8.6559	0.300508	0.997806
AlRepC-2120	hAT-Ac	DNA	-1.35525	-1.35578	10.2699	0.058253	0.997806
AlRepC-213	DNA	DNA	-0.0502227	-0.0502603	8.70328	0.94568	0.997806
AlRepC-2145	hAT-Ac	DNA	0.482507	0.484281	6.94324	0.64914	0.997806
AlRepC-2154	hAT-Ac	DNA	0.592628	0.59518	7.19397	0.566367	0.997806
AlRepC-216	Unknown	Unknown	0.0556651	0.0557502	9.21367	0.937392	0.997806
AlRepC-2165	Unknown	Unknown	-0.224817	-0.22487	10.8717	0.702958	0.997806
AlRepC-22	Unknown	Unknown	0.818369	0.818894	9.54513	0.216879	0.997806
AlRepC-223	ERV1	LTR	0.915953	0.91652	9.65026	0.200386	0.997806
AlRepC-2318	Unknown	Unknown	-1.29975	-1.30223	8.15922	0.22125	0.997806
AlRepC-234	hAT	DNA	0.706036	0.707659	7.78161	0.509077	0.997806
AlRepC-235	Unknown	Unknown	-0.484246	-0.484655	9.32713	0.503783	0.997806
AlRepC-2359	Unknown	Unknown	-0.387713	-0.387819	10.7326	0.560249	0.997806
AlRepC-238	Rex-Babar	LINE	-2.92418	-2.96734	5.41346	0.158994	0.997806
AlRepC-239	Unknown	Unknown	-1.84915	-1.85184	8.4489	0.0194161	0.997806
AlRepC-247	Unknown	Unknown	-0.643575	-0.643807	10.3748	0.273377	0.997806
AlRepC-258	Unknown	Unknown	0.98915	0.989933	9.25667	0.199995	0.997806
AlRepC-2606	Unknown	Unknown	1.83443	1.83673	8.95693	0.0145268	0.997806
AlRepC-269	TcMar-Tc1	DNA	-0.023789	-0.0232623	7.88644	0.984614	0.997806
AlRepC-27	L2	LINE	0.345153	0.346408	7.76932	0.709379	0.997806
AlRepC-270	Unknown	Unknown	-1.08752	-1.09203	6.98882	0.342208	0.997806
AlRepC-2704	hAT-Tip100	DNA	0.185784	0.185817	11.2443	0.748987	0.997806
AlRepC-2717	Rex-Babar	LINE	0.535216	0.538758	6.2396	0.659873	0.997806
AlRepC-281	TcMar-Tc1	DNA	0.952595	0.95362	8.73405	0.314014	0.997806
AlRepC-282	Unknown	Unknown	0.81333	0.81355	10.8789	0.197515	0.997806
AlRepC-286	hAT-Ac	DNA	-2.44181	-2.45222	7.24768	0.0523016	0.997806
AlRepC-2883	Unknown	Unknown	1.49329	1.49588	8.16987	0.071907	0.997806
AlRepC-30	hAT	DNA	0.7428	0.747992	6.16603	0.667582	0.997806
AlRepC-300	Unknown	Unknown	-0.568209	-0.571374	6.80791	0.671096	0.997806
AlRepC-3064	Unknown	Unknown	1.85284	1.86666	6.11554	0.238409	0.997806
AlRepC-308	TcMar-Tc1	DNA	0.445876	0.449505	6.10995	0.744442	0.997806
AlRepC-312	TcMar-Tc1	DNA	0.059445	0.0594553	11.2161	0.916365	0.997806
AlRepC-32	hAT	DNA	-0.690421	-0.69102	9.22285	0.391463	0.997806
AlRepC-3203	Unknown	Unknown	0.027376	0.0273988	11.3459	0.970009	0.997806
AlRepC-326	Unknown	Unknown	0.341575	0.342489	7.45574	0.779412	0.997806
AlRepC-328	Unknown	Unknown	-0.0802617	-0.0802874	10.2585	0.896447	0.997806
AlRepC-3303	Unknown	Unknown	-0.0846013	-0.084654	9.66868	0.90114	0.997806
AlRepC-335	Unknown	Unknown	-1.84392	-1.8466	8.47147	0.0177132	0.997806
AlRepC-345	Gypsy	LTR	-0.866235	-0.867088	8.01236	0.354739	0.997806
AlRepC-346	L2	LINE	-1.21071	-1.21184	8.92295	0.226389	0.997806
AlRepC-349	Unknown	Unknown	-0.297381	-0.297814	8.72337	0.703245	0.997806
AlRepC-358	Unknown	Unknown	-2.14698	-2.15142	8.03547	0.0915857	0.997806
AlRepC-365	Unknown	Unknown	-0.249431	-0.249457	12.168	0.664706	0.997806
AlRepC-373	Unknown	Unknown	0.12741	0.12742	12.462	0.814614	0.997806
AlRepC-374	Unknown	Unknown	1.81554	1.82024	7.57613	0.0848055	0.997806
AlRepC-382	Unknown	Unknown	0.768977	0.77041	8.08771	0.338943	0.997806
AlRepC-394	hAT-Tol2	DNA	-0.105751	-0.105777	10.9375	0.857182	0.997806
AlRepC-4009	Unknown	Unknown	2.82444	2.83951	6.79786	0.0454008	0.997806
AlRepC-4030	DNA	DNA	-0.234561	-0.234788	9.20577	0.749037	0.997806
AlRepC-43	Unknown	Unknown	1.30406	1.30881	6.95935	0.427602	0.997806
AlRepC-436	hAT-Ac	DNA	-0.571924	-0.572567	8.73436	0.548928	0.997806
AlRepC-4392	Rex-Babar	LINE	-0.4488	-0.449899	7.568	0.662184	0.997806
AlRepC-457	hAT-Charlie	DNA	0.58075	0.580985	10.2075	0.348983	0.997806
AlRepC-46	Unknown	Unknown	0.0960602	0.0961738	8.18112	0.912741	0.997806
AlRepC-469	L2	LINE	0.147457	0.147491	10.537	0.814778	0.997806
AlRepC-488	DNA	DNA	-0.234195	-0.234338	9.74241	0.752204	0.997806
AlRepC-501	Rex-Babar	LINE	-0.182333	-0.182929	7.53618	0.842926	0.997806
AlRepC-505	hAT-Charlie	DNA	-0.312878	-0.313215	8.77324	0.743763	0.997806
AlRepC-508	L2	LINE	0.0991085	0.09914	10.5978	0.854936	0.997806
AlRepC-513	PIF-ISL2EU	DNA	-0.196438	-0.196724	8.61759	0.782718	0.997806
AlRepC-521	Retroposon	Retroposon	-0.0124286	-0.0124076	9.98482	0.985185	0.997806
AlRepC-53	Unknown	Unknown	-0.434175	-0.451019	5.82476	0.794044	0.997806
AlRepC-532	hAT	DNA	1.09077	1.09531	6.9787	0.391177	0.997806
AlRepC-536	hAT-Ac	DNA	-0.410768	-0.412331	7.01635	0.736023	0.997806
AlRepC-538	TcMar-Tigger	DNA	-1.56624	-1.57618	6.56449	0.252302	0.997806
AlRepC-539	Unknown	Unknown	-1.44397	-1.45351	6.90458	0.365241	0.997806
AlRepC-550	Unknown	Unknown	2.04618	2.11681	4.43971	0.426768	0.997806
AlRepC-555	PiggyBac	DNA	0.843348	0.844292	8.86437	0.324894	0.997806
AlRepC-558	TcMar-Fot1	DNA	-0.0685597	-0.0685769	12.0484	0.902503	0.997806
AlRepC-560	Unknown	Unknown	-1.02136	-1.02209	9.52398	0.129571	0.997806
AlRepC-563	TcMar-Tc1	DNA	-0.039408	-0.0393349	9.21649	0.968841	0.997806
AlRepC-57	DNA	DNA	-0.263351	-0.263703	9.19733	0.750116	0.997806
AlRepC-572	Unknown	Unknown	-0.0978051	-0.0978368	10.9402	0.876854	0.997806
AlRepC-580	Unknown	Unknown	0.0636148	0.0636205	12.139	0.910802	0.997806
AlRepC-589	Unknown	Unknown	-0.216961	-0.21842	7.64611	0.852006	0.997806
AlRepC-595	P	DNA	-0.300153	-0.300359	9.44709	0.680352	0.997806
AlRepC-61	Unknown	Unknown	-0.467411	-0.467535	10.6	0.458007	0.997806
AlRepC-625	TcMar-Tc2	DNA	-0.747488	-0.750189	7.38659	0.552858	0.997806
AlRepC-631	TcMar-Tc1	DNA	-0.0540629	-0.0540674	12.6831	0.92117	0.997806
AlRepC-637	LINE	LINE	1.45769	1.46458	6.85087	0.342131	0.997806
AlRepC-64	Unknown	Unknown	0.10436	0.104444	9.90003	0.890114	0.997806
AlRepC-643	Unknown	Unknown	0.405141	0.405631	8.69541	0.586641	0.997806
AlRepC-65	PIF-Harbinger	DNA	1.0788	1.08188	7.46744	0.271521	0.997806
AlRepC-659	Unknown	Unknown	0.679783	0.681164	7.93765	0.430368	0.997806
AlRepC-66	PIF-Harbinger	DNA	1.6044	1.6062	8.78779	0.0714612	0.997806
AlRepC-670	Unknown	Unknown	-0.200997	-0.201112	9.70312	0.762047	0.997806
AlRepC-687	Unknown	Unknown	-1.37844	-1.37849	13.6901	0.133218	0.997806
AlRepC-690	Unknown	Unknown	0.886905	0.88839	8.19891	0.355282	0.997806
AlRepC-692	Unknown	Unknown	-0.188659	-0.188678	12.1538	0.695813	0.997806
AlRepC-693	Unknown	Unknown	0.104992	0.105025	11.2629	0.855824	0.997806
AlRepC-696	CMC-EnSpm	DNA	-0.155397	-0.155596	8.54847	0.848164	0.997806
AlRepC-702	Unknown	Unknown	1.05204	1.05437	7.72823	0.405705	0.997806
AlRepC-71	Unknown	Unknown	-0.400965	-0.401382	9.30241	0.568052	0.997806
AlRepC-73	Unknown	Unknown	0.170892	0.170932	11.026	0.779478	0.997806
AlRepC-733	hAT-Ac	DNA	0.144706	0.144896	7.81609	0.89407	0.997806
AlRepC-735	Unknown	Unknown	0.267108	0.267187	10.5856	0.649884	0.997806
AlRepC-736	PIF-Harbinger	DNA	-0.578129	-0.578396	10.0406	0.422367	0.997806
AlRepC-743	L2	LINE	0.0365286	0.0366047	8.55955	0.967395	0.997806
AlRepC-753	Rex-Babar	LINE	0.714318	0.715543	8.1243	0.430607	0.997806
AlRepC-754	DNA	DNA	0.540342	0.54054	10.6282	0.365472	0.997806
AlRepC-767	Unknown	Unknown	-0.60331	-0.603657	9.52305	0.413006	0.997806
AlRepC-769	Unknown	Unknown	0.888265	0.889551	8.48449	0.330422	0.997806
AlRepC-800	LTR	LTR	-0.544165	-0.544761	8.35035	0.513329	0.997806
AlRepC-845	PIF-Harbinger	DNA	0.317782	0.318108	9.07911	0.691701	0.997806
AlRepC-847	Unknown	Unknown	1.10793	1.10974	8.15522	0.260046	0.997806
AlRepC-849	Rex-Babar	LINE	0.0171421	0.0171647	9.13765	0.981152	0.997806
AlRepC-87	Unknown	Unknown	0.441854	0.442144	9.54286	0.475313	0.997806
AlRepC-891	L1	LINE	-2.58629	-2.59336	7.75289	0.0234566	0.997806
AlRepC-895	TcMar-Tc1	DNA	-0.894125	-0.894539	10.0106	0.190783	0.997806
AlRepC-905	Unknown	Unknown	-0.00988786	-0.00988837	12.7898	0.983943	0.997806
AlRepC-91	TcMar-Tc2	DNA	1.22712	1.23252	6.88461	0.350239	0.997806
AlRepC-911	Rex-Babar	LINE	-0.191276	-0.191437	9.27405	0.788107	0.997806
AlRepC-927	hAT-Ac	DNA	0.431592	0.432085	8.82284	0.588953	0.997806
AlRepC-942	Unknown	Unknown	0.0873646	0.0873751	11.9027	0.873108	0.997806
AlRepC-946	TcMar-Tc1	DNA	-1.21658	-1.21684	11.2554	0.0956427	0.997806
AlRepC-959	hAT-Ac	DNA	0.552062	0.552337	8.4732	0.517952	0.997806
AlRepC-962	Unknown	Unknown	-0.222865	-0.222904	11.7973	0.685828	0.997806
AlRepC-968	Unknown	Unknown	0.128966	0.129011	10.3779	0.818162	0.997806
AlRepC-969	Unknown	Unknown	-0.0633049	-0.0633681	9.37788	0.926901	0.997806
AlRepC-98	Unknown	Unknown	-1.40861	-1.40898	10.9009	0.04078	0.997806
AlRepC-987	TcMar-Tc1	DNA	-0.0133125	-0.0133231	9.85338	0.982393	0.997806
AlRepD-100	Unknown	Unknown	-1.13121	-1.1389	6.50587	0.472588	0.997806
AlRepD-1005	Unknown	Unknown	-0.604118	-0.604438	9.51581	0.444855	0.997806
AlRepD-1010	Unknown	Unknown	-1.94915	-1.95653	7.31961	0.179958	0.997806
AlRepD-1014	CMC-EnSpm	DNA	0.0513126	0.0512469	7.20122	0.964658	0.997806
AlRepD-1017	DNA	DNA	0.492966	0.496087	6.43997	0.729806	0.997806
AlRepD-1020	L1	LINE	-0.851325	-0.858391	5.97416	0.543189	0.997806
AlRepD-1024	Unknown	Unknown	0.752292	0.753285	8.44247	0.323761	0.997806
AlRepD-1030	hAT-Ac	DNA	0.908229	0.920348	6.06121	0.62197	0.997806
AlRepD-1040	RTE-BovB	LINE	-0.485643	-0.486249	8.46689	0.59823	0.997806
AlRepD-1055	ERV1	LTR	0.441599	0.442248	8.56355	0.567299	0.997806
AlRepD-1079	TcMar-Tc1	DNA	-1.09914	-1.09946	10.6969	0.116772	0.997806
AlRepD-1103	Unknown	Unknown	1.19588	1.21336	5.37417	0.479782	0.997806
AlRepD-111	Unknown	Unknown	-0.275686	-0.275737	11.3189	0.606976	0.997806
AlRepD-1117	L2	LINE	2.43195	2.43793	7.83645	0.0245213	0.997806
AlRepD-1120	Unknown	Unknown	2.41635	2.43585	6.12935	0.100686	0.997806
AlRepD-1127	L1	LINE	0.462966	0.464061	7.12846	0.693522	0.997806
AlRepD-114	Unknown	Unknown	-0.0169358	-0.0169819	8.13177	0.985487	0.997806
AlRepD-1147	Unknown	Unknown	0.944548	0.946851	7.54947	0.543075	0.997806
AlRepD-1165	L2	LINE	-0.0164401	-0.0164414	12.8353	0.97321	0.997806
AlRepD-11767	PiggyBac	DNA	2.4112	2.44359	5.83603	0.12764	0.997806
AlRepD-1177	Unknown	Unknown	1.38965	1.39337	7.64405	0.211518	0.997806
AlRepD-1181	L2	LINE	-1.03831	-1.04243	7.01673	0.511574	0.997806
AlRepD-11942	Unknown	Unknown	-0.961798	-0.976297	5.76665	0.585527	0.997806
AlRepD-1203	Unknown	Unknown	-2.64297	-2.64686	8.55454	0.011043	0.997806
AlRepD-1209	L2	LINE	0.0279099	0.0274574	6.63223	0.982175	0.997806
AlRepD-12181	Unknown	Unknown	0.443181	0.446831	5.71041	0.828593	0.997806
AlRepD-1221	Rex-Babar	LINE	0.268408	0.269598	7.26646	0.794558	0.997806
AlRepD-12292	Unknown	Unknown	0.231159	0.234201	5.65228	0.89974	0.997806
AlRepD-1230	Unknown	Unknown	0.0394936	0.0395109	8.59505	0.963889	0.997806
AlRepD-1235	Unknown	Unknown	0.845682	0.845944	10.6808	0.169407	0.997806
AlRepD-1254	hAT-Ac	DNA	-0.201923	-0.202331	8.12173	0.847169	0.997806
AlRepD-1256	DNA	DNA	-1.00102	-1.00612	6.65356	0.460226	0.997806
AlRepD-1257	L2	LINE	1.00807	1.01229	6.74455	0.340097	0.997806
AlRepD-1273	PIF-Harbinger	DNA	-0.377013	-0.377299	9.15788	0.630351	0.997806
AlRepD-1283	ERV1	LTR	-0.0949359	-0.0949667	10.6859	0.923115	0.997806
AlRepD-1284	ERV1	LTR	-0.179791	-0.179834	9.87895	0.890993	0.997806
AlRepD-1286	TcMar-Tigger	DNA	0.725799	0.727812	7.73846	0.613495	0.997806
AlRepD-1291	Unknown	Unknown	-0.405118	-0.410129	6.26237	0.765256	0.997806
AlRepD-1296	Unknown	Unknown	0.548488	0.561	5.23621	0.803309	0.997806
AlRepD-1307	Pao	LTR	-0.683642	-0.776655	4.34277	0.785044	0.997806
AlRepD-1318	TcMar-Tc1	DNA	2.75119	2.78623	5.82529	0.151355	0.997806
AlRepD-132	Unknown	Unknown	-0.920721	-0.922241	8.58162	0.540157	0.997806
AlRepD-1337	Unknown	Unknown	0.454721	0.45486	10.6053	0.447647	0.997806
AlRepD-1339	TcMar-Tc2	DNA	-0.285715	-0.286288	7.87541	0.838078	0.997806
AlRepD-134	Unknown	Unknown	-0.604458	-0.604593	11.1025	0.376618	0.997806
AlRepD-1346	L2	LINE	1.09497	1.1028	6.27113	0.468769	0.997806
AlRepD-1353	PiggyBac	DNA	0.0466385	0.0470281	7.02419	0.973821	0.997806
AlRepD-1356	MIR	SINE	-1.12471	-1.1257	8.90616	0.199128	0.997806
AlRepD-1357	Unknown	Unknown	-1.49713	-1.49748	11.0843	0.087353	0.997806
AlRepD-1370	Unknown	Unknown	-0.659002	-0.660921	7.64108	0.605477	0.997806
AlRepD-1371	Unknown	Unknown	-0.605367	-0.606825	7.57047	0.601623	0.997806
AlRepD-1378	CMC-EnSpm	DNA	1.59066	1.63538	5.0024	0.461755	0.997806
AlRepD-1383	Gypsy	LTR	0.551275	0.552578	8.14539	0.602906	0.997806
AlRepD-1385	Unknown	Unknown	2.35619	2.37085	6.51331	0.0599718	0.997806
AlRepD-1389	Unknown	Unknown	2.20216	2.21361	6.84847	0.0997299	0.997806
AlRepD-1390	Unknown	Unknown	0.849192	0.858191	6.54154	0.507266	0.997806
AlRepD-140	Unknown	Unknown	0.378038	0.386429	5.63269	0.834355	0.997806
AlRepD-1402	hAT-Ac	DNA	0.293795	0.294055	7.85276	0.786424	0.997806
AlRepD-1406	Unknown	Unknown	0.0413793	0.0414723	8.97618	0.95923	0.997806
AlRepD-1411	Unknown	Unknown	1.24834	1.27573	5.13788	0.551397	0.997806
AlRepD-1421	Unknown	Unknown	-1.06372	-1.06451	9.30766	0.43862	0.997806
AlRepD-143	Unknown	Unknown	5.04573	5.13038	5.52699	0.0324465	0.997806
AlRepD-1439	SINE	SINE	0.38757	0.388161	8.281	0.650534	0.997806
AlRepD-1441	Unknown	Unknown	0.40803	0.400496	6.11852	0.783689	0.997806
AlRepD-1446	Unknown	Unknown	0.098851	0.0990217	8.03808	0.913739	0.997806
AlRepD-146	Unknown	Unknown	-0.528349	-0.531132	6.83503	0.707715	0.997806
AlRepD-1474	Unknown	Unknown	-0.884493	-0.885721	8.4181	0.467452	0.997806
AlRepD-148	Unknown	Unknown	2.9722	3.02592	5.45001	0.136712	0.997806
AlRepD-1491	Unknown	Unknown	0.361617	0.361913	9.21077	0.660094	0.997806
AlRepD-1512	Unknown	Unknown	0.512191	0.325741	4.78158	0.914413	0.997806
AlRepD-1546	L1	LINE	-0.428448	-0.428812	8.44727	0.657938	0.997806
AlRepD-1554	L2	LINE	-1.43103	-1.43761	6.87735	0.342394	0.997806
AlRepD-157	Unknown	Unknown	0.736972	0.740893	6.54189	0.536848	0.997806
AlRepD-1571	Rex-Babar	LINE	0.304062	0.315718	4.5789	0.887346	0.997806
AlRepD-1575	hAT	DNA	-1.05832	-1.06791	6.10289	0.41522	0.997806
AlRepD-1576	Unknown	Unknown	0.396425	0.396964	8.45099	0.647044	0.997806
AlRepD-1578	Unknown	Unknown	-2.27251	-2.3258	5.52797	0.257426	0.997806
AlRepD-159	Unknown	Unknown	0.0275541	0.0296681	6.8557	0.981213	0.997806
AlRepD-1607	Unknown	Unknown	0.7459	0.745951	12.7456	0.152482	0.997806
AlRepD-1609	Unknown	Unknown	-0.359196	-0.3594	9.7067	0.57211	0.997806
AlRepD-1610	Unknown	Unknown	1.51215	1.5156	7.77181	0.243958	0.997806
AlRepD-1612	TcMar-Tc1	DNA	-0.806506	-0.807551	8.51864	0.405512	0.997806
AlRepD-1627	Unknown	Unknown	-0.388723	-0.389476	8.44005	0.634016	0.997806
AlRepD-163	Unknown	Unknown	-0.0684238	-0.0687194	7.62512	0.944144	0.997806
AlRepD-1636	Unknown	Unknown	0.757176	0.777055	4.83007	0.760071	0.997806
AlRepD-1644	Unknown	Unknown	0.0913461	0.0913467	7.85994	0.930529	0.997806
AlRepD-1658	Unknown	Unknown	-0.738246	-0.738401	11.1632	0.2229	0.997806
AlRepD-1672	L1	LINE	-2.8991	-2.9117	7.10577	0.0105208	0.997806
AlRepD-1712	Unknown	Unknown	-0.988696	-0.993516	6.98075	0.467457	0.997806
AlRepD-1713	tRNA-Core	SINE	0.189835	0.190272	8.48744	0.800971	0.997806
AlRepD-1715	Unknown	Unknown	0.734527	0.736131	7.8561	0.46822	0.997806
AlRepD-1716	Gypsy	LTR	0.244267	0.245766	7.19941	0.825466	0.997806
AlRepD-1719	L2	LINE	-0.750443	-0.752373	7.81966	0.422362	0.997806
AlRepD-1738	Unknown	Unknown	-0.062739	-0.0627726	10.4773	0.919926	0.997806
AlRepD-175	Unknown	Unknown	1.21028	1.21759	6.64176	0.360607	0.997806
AlRepD-1760	Unknown	Unknown	1.43892	1.46778	5.00681	0.519421	0.997806
AlRepD-1783	Unknown	Unknown	0.629158	0.660337	5.46669	0.720511	0.997806
AlRepD-1784	L2	LINE	-2.71262	-2.76278	5.13479	0.138869	0.997806
AlRepD-1787	Unknown	Unknown	0.316374	0.316676	9.10533	0.71318	0.997806
AlRepD-1790	Unknown	Unknown	1.68504	1.69406	6.51743	0.14078	0.997806
AlRepD-1793	Unknown	Unknown	-0.272309	-0.272334	12.325	0.587809	0.997806
AlRepD-1798	Unknown	Unknown	-0.0882204	-0.0882269	10.3225	0.888193	0.997806
AlRepD-180	Unknown	Unknown	-1.72873	-1.73842	6.8441	0.164871	0.997806
AlRepD-1812	Unknown	Unknown	1.54621	1.56901	5.80824	0.401832	0.997806
AlRepD-1816	Unknown	Unknown	0.36737	0.36808	7.66389	0.713692	0.997806
AlRepD-182	tRNA	SINE	0.656182	0.657553	7.90398	0.515643	0.997806
AlRepD-183	DNA	DNA	-0.45728	-0.457732	8.87442	0.559251	0.997806
AlRepD-1830	Gypsy	LTR	-0.430206	-0.431702	7.83041	0.669538	0.997806
AlRepD-1832	Unknown	Unknown	0.0201172	0.0202015	6.82184	0.988726	0.997806
AlRepD-1833	Unknown	Unknown	0.32893	0.330078	7.49138	0.808599	0.997806
AlRepD-1840	Unknown	Unknown	-0.114936	-0.116819	5.10338	0.956363	0.997806
AlRepD-1852	Copia	LTR	-0.501051	-0.501151	11.2038	0.487671	0.997806
AlRepD-189	Unknown	Unknown	0.337538	0.337659	10.4492	0.639778	0.997806
AlRepD-1895	Unknown	Unknown	-0.246872	-0.246975	10.131	0.669924	0.997806
AlRepD-1905	Unknown	Unknown	-1.3612	-1.36303	8.56395	0.182494	0.997806
AlRepD-192	Unknown	Unknown	0.745483	0.745772	10.2465	0.290433	0.997806
AlRepD-1921	TcMar-Tc2	DNA	-0.199486	-0.200759	6.56259	0.914361	0.997806
AlRepD-1926	TcMar-Tc2	DNA	-0.321625	-0.323283	5.49762	0.838948	0.997806
AlRepD-194	CMC-EnSpm	DNA	-0.507991	-0.537362	4.38546	0.881461	0.997806
AlRepD-1948	hAT-hAT5	DNA	-0.952763	-0.959441	6.5639	0.445193	0.997806
AlRepD-195	Unknown	Unknown	-1.38546	-1.38862	7.88156	0.107617	0.997806
AlRepD-1964	Unknown	Unknown	0.348123	0.349553	7.47972	0.743081	0.997806
AlRepD-1965	Unknown	Unknown	0.248008	0.248575	8.38402	0.778177	0.997806
AlRepD-1969	Rex-Babar	LINE	-0.311006	-0.313053	6.57214	0.855037	0.997806
AlRepD-1976	Unknown	Unknown	-0.326198	-0.326486	9.27556	0.650926	0.997806
AlRepD-1981	Unknown	Unknown	-0.537065	-0.537183	10.8729	0.465909	0.997806
AlRepD-199	DNA	DNA	-0.143199	-0.143282	9.69287	0.854151	0.997806
AlRepD-2011	Unknown	Unknown	0.410034	0.410682	8.08264	0.732465	0.997806
AlRepD-2015	Unknown	Unknown	1.55743	1.57327	6.02471	0.291999	0.997806
AlRepD-2017	Unknown	Unknown	1.11356	1.11599	7.91728	0.276977	0.997806
AlRepD-2028	P	DNA	1.17438	1.17774	7.45235	0.272312	0.997806
AlRepD-2030	Unknown	Unknown	0.027773	0.0278996	8.41513	0.976217	0.997806
AlRepD-2046	Unknown	Unknown	1.75757	1.78004	5.92401	0.232698	0.997806
AlRepD-2048	Unknown	Unknown	-0.738887	-0.742969	6.67211	0.606937	0.997806
AlRepD-2057	L2	LINE	1.37406	1.38032	6.88257	0.368586	0.997806
AlRepD-207	Unknown	Unknown	-0.296651	-0.297354	7.3847	0.77924	0.997806
AlRepD-2072	ERV1	LTR	-1.37838	-1.38137	8.45001	0.327876	0.997806
AlRepD-2080	L2	LINE	-0.290985	-0.291935	7.31093	0.747722	0.997806
AlRepD-209	hAT	DNA	-0.215652	-0.216187	8.33342	0.805716	0.997806
AlRepD-2090	Unknown	Unknown	-1.28285	-1.28478	8.32979	0.110002	0.997806
AlRepD-2094	Unknown	Unknown	1.13306	1.15116	5.96394	0.422322	0.997806
AlRepD-210	DIRS	LTR	0.440249	0.442064	6.91384	0.741499	0.997806
AlRepD-2103	RTE-BovB	LINE	0.38195	0.382406	8.96044	0.588845	0.997806
AlRepD-211	Unknown	Unknown	0.642849	0.643517	8.76615	0.4193	0.997806
AlRepD-213	Unknown	Unknown	-0.652126	-0.652801	8.77181	0.410072	0.997806
AlRepD-2135	Unknown	Unknown	0.485134	0.485765	8.34226	0.564814	0.997806
AlRepD-214	Unknown	Unknown	-0.210443	-0.21081	8.15781	0.833639	0.997806
AlRepD-2178	Unknown	Unknown	-3.55668	-3.92027	4.60142	0.130571	0.997806
AlRepD-2186	Unknown	Unknown	-2.63245	-2.66064	5.82531	0.158487	0.997806
AlRepD-2195	Unknown	Unknown	3.80866	3.8345	6.80806	0.00872723	0.997806
AlRepD-2221	Unknown	Unknown	0.110479	0.110497	11.6499	0.842018	0.997806
AlRepD-2225	Rex-Babar	LINE	-0.655706	-0.657068	8.08978	0.482257	0.997806
AlRepD-2251	Dada	DNA	0.318139	0.318437	9.31611	0.627406	0.997806
AlRepD-2258	hAT-Ac	DNA	-0.542432	-0.543794	6.9084	0.676642	0.997806
AlRepD-2262	Unknown	Unknown	-0.0964066	-0.0972005	7.16118	0.93379	0.997806
AlRepD-2283	Unknown	Unknown	0.196231	0.196558	8.20778	0.853325	0.997806
AlRepD-229	Unknown	Unknown	0.530875	0.531373	9.11839	0.515814	0.997806
AlRepD-2291	Unknown	Unknown	0.631595	0.634021	7.29726	0.533486	0.997806
AlRepD-2292	CMC-EnSpm	DNA	-0.158912	-0.158963	10.6768	0.81447	0.997806
AlRepD-2293	Unknown	Unknown	0.938161	0.939911	8.07728	0.3778	0.997806
AlRepD-2296	Ngaro	LTR	0.684785	0.69842	5.25242	0.763158	0.997806
AlRepD-23	ERVK	LTR	-1.23718	-1.23796	9.59889	0.151129	0.997806
AlRepD-2327	hAT	DNA	-0.75828	-0.759566	8.12369	0.365296	0.997806
AlRepD-2331	Unknown	Unknown	0.0772397	0.0772628	9.87262	0.915798	0.997806
AlRepD-2347	Rex-Babar	LINE	0.345586	0.348081	6.72935	0.780247	0.997806
AlRepD-2352	Unknown	Unknown	-0.744504	-0.745012	9.42466	0.307851	0.997806
AlRepD-2362	Unknown	Unknown	-0.139269	-0.139285	11.9037	0.79338	0.997806
AlRepD-2369	Unknown	Unknown	0.539939	0.54134	7.23186	0.622288	0.997806
AlRepD-2376	Unknown	Unknown	-1.23246	-1.24528	6.02858	0.529642	0.997806
AlRepD-2392	Unknown	Unknown	1.12384	1.16385	4.43114	0.711378	0.997806
AlRepD-2405	L2	LINE	-0.142937	-0.14413	6.10883	0.930692	0.997806
AlRepD-2414	Gypsy	LTR	-0.567713	-0.568668	8.1785	0.494454	0.997806
AlRepD-242	Unknown	Unknown	-0.778394	-0.794944	5.48358	0.662212	0.997806
AlRepD-2440	Unknown	Unknown	-1.70026	-1.70288	8.77234	0.238883	0.997806
AlRepD-2443	Unknown	Unknown	0.45239	0.453183	8.15527	0.579421	0.997806
AlRepD-2446	Unknown	Unknown	-0.177047	-0.17719	9.26166	0.817735	0.997806
AlRepD-245	Rex-Babar	LINE	-0.65896	-0.663503	6.24029	0.677916	0.997806
AlRepD-2459	Rex-Babar	LINE	0.806718	0.807504	9.00294	0.256054	0.997806
AlRepD-2463	Unknown	Unknown	0.47736	0.47965	6.8354	0.705618	0.997806
AlRepD-2481	Unknown	Unknown	-2.6474	-2.67538	5.85106	0.121459	0.997806
AlRepD-2509	Unknown	Unknown	0.185681	0.185747	10.2773	0.757683	0.997806
AlRepD-2514	Unknown	Unknown	1.71647	1.74957	5.64241	0.360744	0.997806
AlRepD-253	Unknown	Unknown	-2.36873	-2.43442	4.79851	0.231805	0.997806
AlRepD-2530	Unknown	Unknown	2.12454	2.13444	6.83825	0.0946101	0.997806
AlRepD-2531	Unknown	Unknown	0.403841	0.411139	5.63857	0.800957	0.997806
AlRepD-2553	Unknown	Unknown	-0.90009	-0.956487	5.00042	0.707106	0.997806
AlRepD-2569	TcMar-Tc2	DNA	-0.576282	-0.576914	6.50358	0.673348	0.997806
AlRepD-2583	Unknown	Unknown	0.0529305	0.0529787	9.73086	0.94147	0.997806
AlRepD-259	PiggyBac	DNA	-2.97635	-3.04424	5.01954	0.12992	0.997806
AlRepD-2599	hAT-Charlie	DNA	0.154571	0.154622	10.2264	0.807025	0.997806
AlRepD-2611	TcMar-Tc1	DNA	-1.69721	-1.71193	6.00926	0.328375	0.997806
AlRepD-2645	Unknown	Unknown	-0.0174395	-0.0174345	10.4277	0.977913	0.997806
AlRepD-2648	Unknown	Unknown	-0.802531	-0.802705	5.80083	0.703682	0.997806
AlRepD-2663	L2	LINE	-1.10987	-1.1135	6.84472	0.400594	0.997806
AlRepD-2665	ERV1	LTR	0.204437	0.205368	7.64284	0.887048	0.997806
AlRepD-2695	Unknown	Unknown	-0.372715	-0.372782	11.3843	0.579882	0.997806
AlRepD-27	Unknown	Unknown	0.242323	0.242726	8.21886	0.774336	0.997806
AlRepD-2705	Unknown	Unknown	0.407253	0.409927	6.34165	0.80493	0.997806
AlRepD-2707	DNA	DNA	0.595709	0.597119	7.69776	0.554227	0.997806
AlRepD-2729	Unknown	Unknown	-0.339516	-0.33991	8.89677	0.680957	0.997806
AlRepD-2733	Unknown	Unknown	0.269755	0.270722	7.49522	0.831033	0.997806
AlRepD-2734	I	LINE	0.476728	0.477675	7.89305	0.557887	0.997806
AlRepD-2742	Unknown	Unknown	-0.511904	-0.511938	6.39573	0.717523	0.997806
AlRepD-2754	P	DNA	4.00205	4.0935	5.47	0.078168	0.997806
AlRepD-2769	CMC-EnSpm	DNA	-0.0515583	-0.0515469	8.01346	0.952001	0.997806
AlRepD-2779	hAT-Ac	DNA	0.330216	0.330742	8.25023	0.684626	0.997806
AlRepD-280	Unknown	Unknown	1.34117	1.34505	7.28281	0.221012	0.997806
AlRepD-2811	Unknown	Unknown	-0.527164	-0.52884	6.78717	0.690797	0.997806
AlRepD-2838	Unknown	Unknown	0.987217	0.989545	7.7048	0.333128	0.997806
AlRepD-2848	L1-Tx1	LINE	0.547143	0.54969	6.49123	0.749639	0.997806
AlRepD-287	Unknown	Unknown	-0.694826	-0.713359	6.05977	0.749159	0.997806
AlRepD-2879	hAT-Ac	DNA	-0.968709	-0.97509	6.39808	0.640592	0.997806
AlRepD-288	L2	LINE	-0.161481	-0.161836	7.95513	0.839039	0.997806
AlRepD-29	Unknown	Unknown	0.252659	0.255756	6.15256	0.860339	0.997806
AlRepD-2913	Unknown	Unknown	2.62308	2.65824	5.87075	0.0808413	0.997806
AlRepD-2923	Unknown	Unknown	3.07357	3.09544	6.42631	0.0457337	0.997806
AlRepD-2942	L2	LINE	-0.077407	-0.0793798	7.20456	0.9605	0.997806
AlRepD-2959	Unknown	Unknown	0.888606	0.891806	7.09241	0.480622	0.997806
AlRepD-2961	Unknown	Unknown	0.313864	0.315034	6.10814	0.815905	0.997806
AlRepD-297	Unknown	Unknown	0.408973	0.41043	6.8537	0.720404	0.997806
AlRepD-2997	hAT	DNA	1.48307	1.48575	8.54919	0.110386	0.997806
AlRepD-30	Unknown	Unknown	0.37695	0.379871	6.67047	0.766646	0.997806
AlRepD-3030	Unknown	Unknown	-0.023676	-0.0238439	7.3316	0.984922	0.997806
AlRepD-3031	Unknown	Unknown	0.35731	0.35786	8.11642	0.664415	0.997806
AlRepD-3038	Rex-Babar	LINE	-0.0161708	-0.0162724	7.18578	0.986965	0.997806
AlRepD-306	PiggyBac	DNA	0.116189	0.11625	10.2334	0.868001	0.997806
AlRepD-3065	Unknown	Unknown	-0.983639	-0.98419	9.7553	0.116667	0.997806
AlRepD-3077	PIF-Harbinger	DNA	2.08193	2.10201	6.35587	0.227661	0.997806
AlRepD-3081	Unknown	Unknown	0.427813	0.430562	6.38666	0.783423	0.997806
AlRepD-3099	Unknown	Unknown	-0.329244	-0.332397	5.53415	0.847978	0.997806
AlRepD-311	Unknown	Unknown	-0.527204	-0.528867	7.55467	0.651943	0.997806
AlRepD-3120	Unknown	Unknown	1.71107	1.77308	4.82324	0.525116	0.997806
AlRepD-3134	Gypsy	LTR	-4.86951	-5.3849	4.23505	0.084233	0.997806
AlRepD-3161	Unknown	Unknown	0.528446	0.531992	6.74754	0.747395	0.997806
AlRepD-3179	Unknown	Unknown	-0.18139	-0.181532	9.16388	0.828587	0.997806
AlRepD-3184	hAT	DNA	0.244925	0.245195	8.60572	0.782076	0.997806
AlRepD-3226	L2	LINE	0.626302	0.629696	6.8148	0.632179	0.997806
AlRepD-3229	ERV1	LTR	0.600795	0.601418	9.06659	0.425867	0.997806
AlRepD-325	Unknown	Unknown	-1.18089	-1.18867	6.39939	0.548268	0.997806
AlRepD-3252	DNA	DNA	-0.0471837	-0.0472009	10.3177	0.935396	0.997806
AlRepD-326	Unknown	Unknown	-0.65651	-0.656962	9.44272	0.355688	0.997806
AlRepD-3275	hAT-Ac	DNA	-0.92905	-0.930602	8.05526	0.320463	0.997806
AlRepD-328	Unknown	Unknown	-1.09388	-1.10551	5.98506	0.433905	0.997806
AlRepD-3287	hAT-hAT5	DNA	0.663423	0.664975	7.67073	0.472617	0.997806
AlRepD-3364	Helitron	RC	-0.463498	-0.464382	7.9525	0.590974	0.997806
AlRepD-337	TcMar-Tc2	DNA	0.294873	0.295345	8.41884	0.713815	0.997806
AlRepD-34	Unknown	Unknown	-0.265838	-0.266298	8.22771	0.77061	0.997806
AlRepD-3423	Unknown	Unknown	1.41404	1.42058	6.84213	0.38667	0.997806
AlRepD-347	Unknown	Unknown	-0.9059	-0.912596	6.64784	0.540874	0.997806
AlRepD-3491	Sola	DNA	0.41342	0.417263	5.96405	0.80636	0.997806
AlRepD-355	Unknown	Unknown	0.765495	0.765703	10.7746	0.190626	0.997806
AlRepD-3550	Unknown	Unknown	-0.459142	-0.459716	8.1864	0.604155	0.997806
AlRepD-3570	Unknown	Unknown	-0.496116	-0.502438	5.97271	0.830689	0.997806
AlRepD-3586	Unknown	Unknown	2.22856	2.26544	5.73313	0.165236	0.997806
AlRepD-360	Unknown	Unknown	-1.41087	-1.41748	6.77932	0.23687	0.997806
AlRepD-3604	Unknown	Unknown	-0.612687	-0.612957	10.0412	0.404829	0.997806
AlRepD-363	Gypsy	LTR	0.555042	0.555874	8.86313	0.536351	0.997806
AlRepD-3650	Unknown	Unknown	0.0891444	0.0892009	9.23058	0.898651	0.997806
AlRepD-366	Unknown	Unknown	-3.55809	-3.63386	5.235	0.087781	0.997806
AlRepD-3668	DNA	DNA	0.690275	0.70072	6.72572	0.576639	0.997806
AlRepD-3684	TcMar-ISRm11	DNA	0.639286	0.653112	4.76631	0.824944	0.997806
AlRepD-371	Unknown	Unknown	0.893771	0.898257	6.56719	0.586953	0.997806
AlRepD-3782	Rex-Babar	LINE	1.88693	2.02181	4.35128	0.604427	0.997806
AlRepD-3787	Unknown	Unknown	-3.95546	-4.00943	6.85098	0.0581796	0.997806
AlRepD-381	TcMar-Tigger	DNA	-0.550022	-0.552984	6.76145	0.678261	0.997806
AlRepD-3818	Unknown	Unknown	0.159452	0.159853	7.93785	0.874649	0.997806
AlRepD-382	DNA	DNA	-1.37142	-1.37594	7.43317	0.16081	0.997806
AlRepD-3826	Unknown	Unknown	-0.781575	-0.793374	5.61302	0.63477	0.997806
AlRepD-383	Unknown	Unknown	1.16017	1.16497	6.97434	0.402011	0.997806
AlRepD-3833	Unknown	Unknown	-2.38009	-2.45006	4.81174	0.377365	0.997806
AlRepD-386	Unknown	Unknown	0.0577825	0.0578002	10.7389	0.919736	0.997806
AlRepD-389	L2	LINE	0.0233149	0.0232711	9.35575	0.978417	0.997806
AlRepD-3916	Unknown	Unknown	0.449075	0.461742	5.24284	0.789647	0.997806
AlRepD-392	Unknown	Unknown	-1.23026	-1.23691	7.04965	0.425921	0.997806
AlRepD-4	Unknown	Unknown	1.16677	1.16918	7.95845	0.205418	0.997806
AlRepD-4002	Unknown	Unknown	-0.348842	-0.353618	5.67767	0.850912	0.997806
AlRepD-4032	hAT-Ac	DNA	1.13653	1.14407	6.75184	0.387676	0.997806
AlRepD-4040	DNA	DNA	-0.319289	-0.319602	8.7508	0.684131	0.997806
AlRepD-412	Unknown	Unknown	0.10109	0.101173	9.51012	0.874965	0.997806
AlRepD-4130	hAT-Ac	DNA	0.539977	0.541719	7.24321	0.60445	0.997806
AlRepD-4248	hAT-Ac	DNA	1.48094	1.48696	7.19905	0.247173	0.997806
AlRepD-4270	L2	LINE	-0.756336	-0.757318	8.62745	0.352277	0.997806
AlRepD-4279	Unknown	Unknown	0.578114	0.579709	7.94433	0.53353	0.997806
AlRepD-4348	Unknown	Unknown	0.717938	0.719041	8.18626	0.395193	0.997806
AlRepD-435	Unknown	Unknown	-0.200429	-0.200653	8.69381	0.798491	0.997806
AlRepD-4371	Unknown	Unknown	2.13122	2.22598	4.24761	0.488057	0.997806
AlRepD-4379	RTE-BovB	LINE	-1.53336	-1.53601	8.18655	0.128237	0.997806
AlRepD-44	Unknown	Unknown	2.87867	2.8832	8.52398	0.0125346	0.997806
AlRepD-440	Unknown	Unknown	-0.271126	-0.271411	8.36928	0.717378	0.997806
AlRepD-4541	Rex-Babar	LINE	-0.270444	-0.270944	7.15752	0.797388	0.997806
AlRepD-4565	MULE-MuDR	DNA	0.0258081	0.0251601	7.99255	0.978939	0.997806
AlRepD-4584	Unknown	Unknown	-0.348499	-0.349192	7.74485	0.708137	0.997806
AlRepD-46	Unknown	Unknown	0.262433	0.26311	7.63119	0.84526	0.997806
AlRepD-4606	Unknown	Unknown	1.06249	1.06611	7.08141	0.340473	0.997806
AlRepD-4614	L2	LINE	0.177593	0.177597	6.83674	0.864535	0.997806
AlRepD-463	Unknown	Unknown	0.438312	0.438576	9.92605	0.526204	0.997806
AlRepD-467	Helitron	RC	-2.15752	-2.16516	7.32431	0.0653775	0.997806
AlRepD-4675	Unknown	Unknown	-1.18281	-1.23983	4.40159	0.687012	0.997806
AlRepD-469	Unknown	Unknown	0.941722	0.943137	8.3211	0.225021	0.997806
AlRepD-4703	Unknown	Unknown	0.135604	0.135661	9.45872	0.84921	0.997806
AlRepD-484	Unknown	Unknown	0.131204	0.131235	9.75293	0.851258	0.997806
AlRepD-487	hAT-Ac	DNA	2.32505	2.33907	6.44002	0.0889711	0.997806
AlRepD-488	Unknown	Unknown	1.94022	1.96657	5.67141	0.253401	0.997806
AlRepD-4889	Unknown	Unknown	0.78754	0.789264	7.82952	0.427045	0.997806
AlRepD-491	Unknown	Unknown	-0.603514	-0.607497	6.31048	0.70448	0.997806
AlRepD-497	Unknown	Unknown	0.679916	0.683879	6.34859	0.655144	0.997806
AlRepD-499	Unknown	Unknown	1.11197	1.11969	6.25832	0.420725	0.997806
AlRepD-4997	Unknown	Unknown	0.722551	0.725922	6.76735	0.622364	0.997806
AlRepD-5020	hAT-Ac	DNA	0.247378	0.248042	7.8019	0.792439	0.997806
AlRepD-5038	CMC-EnSpm	DNA	1.34123	1.37608	5.58442	0.476184	0.997806
AlRepD-5045	Unknown	Unknown	-0.174141	-0.177607	6.65007	0.888957	0.997806
AlRepD-508	Unknown	Unknown	0.137078	0.137927	6.79063	0.933759	0.997806
AlRepD-5093	hAT-Charlie	DNA	-0.403659	-0.407095	6.01602	0.797613	0.997806
AlRepD-5194	MIR	SINE	0.813377	0.814075	9.13748	0.219471	0.997806
AlRepD-520	Unknown	Unknown	2.01841	2.04584	6.35948	0.155122	0.997806
AlRepD-5228	SINE	SINE	-3.91741	-4.26794	4.05637	0.172254	0.997806
AlRepD-5264	Unknown	Unknown	1.56206	1.56886	7.00854	0.253818	0.997806
AlRepD-528	Helitron	RC	-1.40863	-1.41427	7.00602	0.24548	0.997806
AlRepD-531	Unknown	Unknown	0.303993	0.304422	7.81521	0.764914	0.997806
AlRepD-5346	Unknown	Unknown	3.53435	3.66064	4.52679	0.225848	0.997806
AlRepD-5347	Unknown	Unknown	-0.762923	-0.769863	6.30842	0.543091	0.997806
AlRepD-5353	hAT-Charlie	DNA	0.207407	0.207728	8.27118	0.799046	0.997806
AlRepD-542	Unknown	Unknown	1.74842	1.78206	5.46623	0.356704	0.997806
AlRepD-5449	Unknown	Unknown	-0.0518575	-0.0518804	9.9205	0.94115	0.997806
AlRepD-546	Unknown	Unknown	-0.361048	-0.361384	9.00329	0.677647	0.997806
AlRepD-5487	PiggyBac	DNA	0.087379	0.0877171	7.59015	0.946342	0.997806
AlRepD-5500	Unknown	Unknown	1.76323	1.79433	5.87254	0.280497	0.997806
AlRepD-5518	Unknown	Unknown	8.09091	1.44269e+08	4.56278	0.00551856	0.997806
AlRepD-5624	Unknown	Unknown	0.0161336	0.0161645	10.4123	0.979703	0.997806
AlRepD-5654	Unknown	Unknown	-0.851529	-0.862412	5.44852	0.634933	0.997806
AlRepD-57	Unknown	Unknown	-0.732885	-0.733264	9.912	0.262604	0.997806
AlRepD-5726	Unknown	Unknown	0.138908	0.139554	7.67194	0.898834	0.997806
AlRepD-573	Unknown	Unknown	-0.150736	-0.150837	10.1714	0.826789	0.997806
AlRepD-577	Unknown	Unknown	1.5203	1.52816	6.6595	0.270544	0.997806
AlRepD-580	Unknown	Unknown	0.4864	0.486595	10.2108	0.539196	0.997806
AlRepD-583	Unknown	Unknown	-0.7825	-0.783184	9.05058	0.28208	0.997806
AlRepD-5842	Rex-Babar	LINE	-0.742893	-0.725527	5.52631	0.73348	0.997806
AlRepD-586	Rex-Babar	LINE	-1.60058	-1.6074	6.96213	0.213467	0.997806
AlRepD-5893	Unknown	Unknown	0.798448	0.800396	8.28594	0.409022	0.997806
AlRepD-590	Unknown	Unknown	1.12829	1.13032	8.33531	0.230555	0.997806
AlRepD-591	Unknown	Unknown	-0.204707	-0.20534	7.42537	0.899969	0.997806
AlRepD-5953	Unknown	Unknown	1.23481	1.24528	6.26469	0.484342	0.997806
AlRepD-606	Unknown	Unknown	0.475372	0.476448	8.13762	0.59537	0.997806
AlRepD-609	Unknown	Unknown	0.274031	0.27534	7.16009	0.799425	0.997806
AlRepD-611	hAT-hobo	DNA	0.844137	0.844207	12.6339	0.200032	0.997806
AlRepD-618	Unknown	Unknown	0.248153	0.248911	7.59585	0.814832	0.997806
AlRepD-623	I-Nimb	LINE	0.821415	0.826919	6.39203	0.538519	0.997806
AlRepD-6245	Unknown	Unknown	-1.42552	-1.42935	7.63062	0.191259	0.997806
AlRepD-6292	TcMar-Tc1	DNA	0.358616	0.358951	8.96941	0.65139	0.997806
AlRepD-6317	Unknown	Unknown	-1.97884	-2.00524	6.00762	0.251044	0.997806
AlRepD-641	TcMar-ISRm11	DNA	1.8827	1.91315	5.3152	0.275611	0.997806
AlRepD-645	hAT-Ac	DNA	-0.613223	-0.616608	6.38293	0.641263	0.997806
AlRepD-6450	L2	LINE	0.995386	0.996201	9.14167	0.218727	0.997806
AlRepD-6552	Unknown	Unknown	-0.796432	-0.807506	5.6404	0.617835	0.997806
AlRepD-6553	Unknown	Unknown	-0.337878	-0.338037	9.08989	0.675082	0.997806
AlRepD-657	hAT-Tol2	DNA	1.38788	1.38955	8.71744	0.0848569	0.997806
AlRepD-677	Unknown	Unknown	0.271606	0.272429	7.32107	0.810756	0.997806
AlRepD-6835	Unknown	Unknown	0.423695	0.424777	7.48786	0.701266	0.997806
AlRepD-685	Unknown	Unknown	-0.993882	-0.994055	11.6239	0.181743	0.997806
AlRepD-687	TcMar-Tc1	DNA	0.338834	0.338695	7.81479	0.776653	0.997806
AlRepD-688	Unknown	Unknown	-0.662511	-0.663473	8.38885	0.446028	0.997806
AlRepD-697	hAT-Blackjack	DNA	-1.19364	-1.2083	5.69021	0.529608	0.997806
AlRepD-6972	Unknown	Unknown	1.16506	1.16546	10.4885	0.108191	0.997806
AlRepD-7076	Unknown	Unknown	-0.718087	-0.724523	5.85269	0.677881	0.997806
AlRepD-716	hAT-Ac	DNA	-0.0883468	-0.0865371	6.39825	0.963446	0.997806
AlRepD-727	hAT-Ac	DNA	0.984936	0.990352	6.81909	0.413817	0.997806
AlRepD-728	Unknown	Unknown	-0.56126	-0.565991	5.86676	0.773762	0.997806
AlRepD-74	PIF-Harbinger	DNA	-0.175812	-0.176062	8.55109	0.82417	0.997806
AlRepD-755	Unknown	Unknown	-0.603955	-0.604462	9.09322	0.461303	0.997806
AlRepD-756	Unknown	Unknown	-0.802412	-0.805461	7.36193	0.465019	0.997806
AlRepD-7574	Unknown	Unknown	-0.977188	-0.990995	5.33575	0.660159	0.997806
AlRepD-762	Unknown	Unknown	0.31868	0.319391	7.31381	0.757953	0.997806
AlRepD-763	TcMar-ISRm11	DNA	4.96357	5.19832	4.92562	0.0263302	0.997806
AlRepD-772	DNA	DNA	-0.837476	-0.838687	8.37958	0.343865	0.997806
AlRepD-775	Unknown	Unknown	-0.931075	-0.933068	8.57225	0.373304	0.997806
AlRepD-779	Unknown	Unknown	-0.380037	-0.380422	8.96795	0.609809	0.997806
AlRepD-783	Unknown	Unknown	0.165535	0.165951	6.97851	0.882426	0.997806
AlRepD-79	TcMar-Tc1	DNA	1.07928	1.0989	5.41126	0.585527	0.997806
AlRepD-7900	R2-Hero	LINE	3.34463	3.35057	8.5964	0.0102083	0.997806
AlRepD-807	Rex-Babar	LINE	0.37824	0.382214	6.12586	0.802049	0.997806
AlRepD-808	PIF-Harbinger	DNA	-1.19194	-1.19797	6.97555	0.310976	0.997806
AlRepD-8121	L2	LINE	2.8309	2.88083	6.23239	0.0634972	0.997806
AlRepD-813	Unknown	Unknown	3.17689	3.31956	5.89552	0.135877	0.997806
AlRepD-816	PiggyBac	DNA	0.849958	0.854411	6.65072	0.466699	0.997806
AlRepD-818	Unknown	Unknown	-1.22377	-1.22931	6.80658	0.299111	0.997806
AlRepD-8195	Unknown	Unknown	-1.45903	-1.46055	8.67495	0.0671553	0.997806
AlRepD-82	L1	LINE	1.93139	1.94904	6.50019	0.358356	0.997806
AlRepD-826	DNA	DNA	1.95008	1.96203	6.80309	0.210007	0.997806
AlRepD-837	TcMar-Tc1	DNA	-0.252252	-0.25249	9.05493	0.713416	0.997806
AlRepD-842	Unknown	Unknown	0.2718	0.278464	5.38264	0.876329	0.997806
AlRepD-843	Unknown	Unknown	0.800736	0.806448	6.49051	0.52948	0.997806
AlRepD-847	L2	LINE	-0.121258	-0.121293	10.3169	0.901807	0.997806
AlRepD-8475	hAT-Ac	DNA	-0.838262	-0.847483	5.90844	0.676393	0.997806
AlRepD-850	Rex-Babar	LINE	1.00824	1.01166	6.72934	0.38671	0.997806
AlRepD-856	Rex-Babar	LINE	-1.19369	-1.19529	8.50421	0.157781	0.997806
AlRepD-859	hAT-Charlie	DNA	0.269201	0.269442	9.04455	0.702314	0.997806
AlRepD-870	Unknown	Unknown	0.116776	0.11685	9.47749	0.858478	0.997806
AlRepD-873	Unknown	Unknown	-0.202619	-0.202837	9.21224	0.809198	0.997806
AlRepD-880	Unknown	Unknown	-0.329914	-0.330264	8.9737	0.676127	0.997806
AlRepD-886	Unknown	Unknown	0.46994	0.470306	9.28691	0.526675	0.997806
AlRepD-892	hAT-Ac	DNA	1.91555	1.94288	5.96626	0.270623	0.997806
AlRepD-908	Unknown	Unknown	0.502698	0.504034	7.56877	0.695278	0.997806
AlRepD-91	Unknown	Unknown	2.1153	2.20104	5.20951	0.293353	0.997806
AlRepD-916	Unknown	Unknown	-3.48706	-3.84627	4.97378	0.124701	0.997806
AlRepD-92	Unknown	Unknown	0.677712	0.678147	10.153	0.325718	0.997806
AlRepD-934	Unknown	Unknown	-0.247765	-0.248516	7.22245	0.816526	0.997806
AlRepD-94	Unknown	Unknown	-1.78476	-1.79426	7.09671	0.229777	0.997806
AlRepD-946	Unknown	Unknown	0.209177	0.209441	8.71052	0.76373	0.997806
AlRepD-956	PIF-Harbinger	DNA	0.616292	0.616953	8.78836	0.510018	0.997806
AlRepD-970	L2	LINE	-0.670781	-0.671135	9.81148	0.467379	0.997806
AlRepD-974	Unknown	Unknown	0.196633	0.196716	10.0763	0.787128	0.997806
AlRepD-984	Unknown	Unknown	0.658457	0.659434	8.70347	0.558603	0.997806
AlRepD-987	Unknown	Unknown	-0.72312	-0.723194	12.2422	0.283334	0.997806
AlRepD-990	ERV1	LTR	-0.909856	-0.909888	13.5154	0.139922	0.997806
AlRepD-991	Unknown	Unknown	-1.49858	-1.49965	9.42464	0.0841616	0.997806
AlRepD-992	L1	LINE	2.52809	2.53826	7.14027	0.0236109	0.997806
AlRepE-1008	Unknown	Unknown	1.79666	1.80988	6.15786	0.33049	0.997806
AlRepE-1024	Retroposon	Retroposon	-2.01224	-2.02292	6.61867	0.225581	0.997806
AlRepE-1026	Unknown	Unknown	-0.089829	-0.089855	10.0106	0.879911	0.997806
AlRepE-1027	DNA	DNA	1.11063	1.11438	7.18825	0.248775	0.997806
AlRepE-1044	Unknown	Unknown	-0.773603	-0.775052	8.0472	0.316986	0.997806
AlRepE-1056	Unknown	Unknown	-0.47081	-0.473048	5.78695	0.829546	0.997806
AlRepE-10970	Unknown	Unknown	-0.379787	-0.392444	5.15437	0.85107	0.997806
AlRepE-1110	Unknown	Unknown	2.51927	2.52989	7.30397	0.025866	0.997806
AlRepE-1134	Unknown	Unknown	0.0763015	0.0763576	7.22101	0.949846	0.997806
AlRepE-1139	Unknown	Unknown	-0.633321	-0.641702	6.12171	0.668832	0.997806
AlRepE-11422	Unknown	Unknown	-0.158529	-0.157794	6.06728	0.924969	0.997806
AlRepE-118	PIF-Harbinger	DNA	-0.97882	-0.980527	8.22289	0.253054	0.997806
AlRepE-1201	Unknown	Unknown	0.134093	0.134241	8.55498	0.867404	0.997806
AlRepE-1208	Unknown	Unknown	-1.00286	-1.01272	5.70741	0.594711	0.997806
AlRepE-1213	L2	LINE	0.882464	0.884956	7.44937	0.370814	0.997806
AlRepE-1220	Rex-Babar	LINE	-1.22326	-1.25694	5.50151	0.53023	0.997806
AlRepE-1229	TcMar-Tc1	DNA	0.0964877	0.0965204	9.57235	0.880727	0.997806
AlRepE-12676	Unknown	Unknown	1.27191	1.30976	4.84456	0.637641	0.997806
AlRepE-12844	Rex-Babar	LINE	-1.0591	-1.06595	6.25531	0.564829	0.997806
AlRepE-130	Gypsy	LTR	1.35984	1.36895	6.05383	0.373307	0.997806
AlRepE-1331	ERV1	LTR	1.66408	1.66733	8.12584	0.100762	0.997806
AlRepE-134	DNA	DNA	2.55439	2.61154	4.89166	0.311102	0.997806
AlRepE-1352	Unknown	Unknown	-0.78013	-0.80554	5.4429	0.718537	0.997806
AlRepE-1373	Unknown	Unknown	1.7519	1.76603	6.07016	0.257186	0.997806
AlRepE-1423	Unknown	Unknown	-0.927169	-0.929175	7.87768	0.279833	0.997806
AlRepE-1425	Unknown	Unknown	0.254359	0.25496	7.24273	0.799403	0.997806
AlRepE-1436	hAT-Blackjack	DNA	-0.487989	-0.488354	9.04461	0.528655	0.997806
AlRepE-1442	Unknown	Unknown	-1.97972	-1.99732	6.08365	0.193565	0.997806
AlRepE-1471	Unknown	Unknown	1.12013	1.12157	8.55506	0.229515	0.997806
AlRepE-1478	CMC-EnSpm	DNA	-0.424464	-0.425584	7.77467	0.6843	0.997806
AlRepE-1501	Unknown	Unknown	0.887761	0.892458	6.82091	0.493761	0.997806
AlRepE-1530	Unknown	Unknown	2.50532	2.55773	5.34535	0.170189	0.997806
AlRepE-1560	hAT	DNA	0.442493	0.443505	6.00789	0.786718	0.997806
AlRepE-1561	Pao	LTR	2.97709	3.06254	5.34824	0.139366	0.997806
AlRepE-1600	L1-Tx1	LINE	0.531273	0.533973	6.68321	0.710335	0.997806
AlRepE-1615	CMC-EnSpm	DNA	0.453273	0.456093	5.99074	0.789039	0.997806
AlRepE-1640	Unknown	Unknown	-0.169853	-0.170239	7.59517	0.860397	0.997806
AlRepE-1657	Unknown	Unknown	0.501454	0.502955	7.3875	0.670902	0.997806
AlRepE-1661	ERV1	LTR	-1.10795	-1.10957	8.39657	0.357874	0.997806
AlRepE-1678	L2	LINE	0.697526	0.708825	5.10442	0.761552	0.997806
AlRepE-1681	Unknown	Unknown	-0.402079	-0.402475	8.72669	0.65886	0.997806
AlRepE-1737	Unknown	Unknown	-2.74468	-2.83149	5.22508	0.185636	0.997806
AlRepE-174	ERV1	LTR	-0.0819764	-0.0827366	5.84602	0.952971	0.997806
AlRepE-1780	Unknown	Unknown	0.140425	0.146384	4.94028	0.943657	0.997806
AlRepE-179	Helitron	RC	-0.327564	-0.32767	5.49286	0.896454	0.997806
AlRepE-180	Unknown	Unknown	0.416108	0.417924	7.40692	0.676474	0.997806
AlRepE-182	Unknown	Unknown	-0.0971126	-0.09819	6.80565	0.930015	0.997806
AlRepE-1831	Unknown	Unknown	-1.53525	-1.54302	6.69189	0.154541	0.997806
AlRepE-1839	Unknown	Unknown	-0.861868	-0.864362	7.18647	0.508868	0.997806
AlRepE-1897	L2	LINE	-1.19062	-1.21447	5.4083	0.609845	0.997806
AlRepE-193	Unknown	Unknown	0.0869488	0.0834419	6.08053	0.957434	0.997806
AlRepE-199	Unknown	Unknown	-1.45231	-1.45335	9.42903	0.0352456	0.997806
AlRepE-2032	Unknown	Unknown	3.48306	3.51726	6.06386	0.0183953	0.997806
AlRepE-2033	Unknown	Unknown	-1.73047	-1.77056	5.01699	0.417595	0.997806
AlRepE-205	Unknown	Unknown	-1.54738	-1.56337	5.71143	0.31779	0.997806
AlRepE-2094	Unknown	Unknown	4.58935	4.74366	5.72497	0.0196632	0.997806
AlRepE-2095	Unknown	Unknown	1.52367	1.52695	7.84459	0.0756474	0.997806
AlRepE-2096	Unknown	Unknown	0.585765	0.586941	8.22958	0.621056	0.997806
AlRepE-2097	hAT-Tip100	DNA	-0.910149	-0.951422	4.95911	0.705205	0.997806
AlRepE-2127	Unknown	Unknown	0.287662	0.289128	6.94213	0.832716	0.997806
AlRepE-2129	Unknown	Unknown	1.38974	1.39672	6.38865	0.399532	0.997806
AlRepE-2134	Unknown	Unknown	-1.14708	-1.15017	7.61746	0.284283	0.997806
AlRepE-2149	Unknown	Unknown	1.6395	1.66306	5.31268	0.535182	0.997806
AlRepE-217	Unknown	Unknown	-0.279513	-0.279874	8.77988	0.714302	0.997806
AlRepE-2236	Unknown	Unknown	-0.215063	-0.216185	4.65777	0.943494	0.997806
AlRepE-2243	Unknown	Unknown	3.15332	3.18497	5.89796	0.195994	0.997806
AlRepE-2280	Unknown	Unknown	0.679442	0.699672	4.64035	0.785556	0.997806
AlRepE-233	DNA	DNA	-0.841955	-0.871094	5.19968	0.74444	0.997806
AlRepE-2339	Unknown	Unknown	0.529246	0.529503	9.90387	0.411828	0.997806
AlRepE-2341	L2	LINE	0.111949	0.112012	9.67072	0.865069	0.997806
AlRepE-235	Unknown	Unknown	-1.26153	-1.26581	7.43874	0.410829	0.997806
AlRepE-2361	Unknown	Unknown	-0.155202	-0.156132	6.80151	0.927936	0.997806
AlRepE-2393	hAT-Charlie	DNA	-0.306314	-0.306511	9.33648	0.649617	0.997806
AlRepE-2401	PIF-Harbinger	DNA	0.45147	0.452084	8.56722	0.535303	0.997806
AlRepE-2431	Unknown	Unknown	-2.85041	-2.89972	5.24278	0.14491	0.997806
AlRepE-246	Rex-Babar	LINE	0.368691	0.369512	7.59522	0.719662	0.997806
AlRepE-2537	PiggyBac	DNA	0.393018	0.394012	7.23986	0.759495	0.997806
AlRepE-2550	Unknown	Unknown	-3.74286	-3.82247	5.24691	0.0706173	0.997806
AlRepE-2559	TcMar-Tc1	DNA	2.39699	2.42141	5.83872	0.126732	0.997806
AlRepE-257	TcMar-ISRm11	DNA	1.11055	1.11202	9.5661	0.175587	0.997806
AlRepE-2572	Unknown	Unknown	0.0170127	0.0170185	12.4846	0.97899	0.997806
AlRepE-2606	Unknown	Unknown	-0.0260644	-0.029417	5.80752	0.989141	0.997806
AlRepE-2619	Unknown	Unknown	0.908999	0.931839	4.76665	0.737444	0.997806
AlRepE-262	hAT-Tip100	DNA	-0.916181	-0.920259	6.98075	0.519537	0.997806
AlRepE-2621	IS3EU	DNA	1.14018	1.16149	5.94556	0.462022	0.997806
AlRepE-2629	RTE-BovB	LINE	-1.09267	-1.10482	5.70778	0.491241	0.997806
AlRepE-2642	RTE-BovB	LINE	2.66786	1.44269e+08	3.90633	0.273823	0.997806
AlRepE-2666	Unknown	Unknown	-0.954385	-0.961826	6.00339	0.581102	0.997806
AlRepE-2717	Unknown	Unknown	-2.3976	-2.42121	5.91951	0.193652	0.997806
AlRepE-2742	Unknown	Unknown	4.69059	4.8619	5.10347	0.047621	0.997806
AlRepE-2751	Unknown	Unknown	0.770348	0.773294	7.29737	0.498691	0.997806
AlRepE-277	Unknown	Unknown	0.605043	0.606156	8.03513	0.532129	0.997806
AlRepE-2778	CMC-EnSpm	DNA	-2.51021	-2.53756	6.47717	0.0425441	0.997806
AlRepE-2826	Unknown	Unknown	0.206953	0.206975	11.0428	0.741142	0.997806
AlRepE-2838	hAT-Tol2	DNA	-0.519775	-0.520172	9.27903	0.453588	0.997806
AlRepE-284	Unknown	Unknown	1.66205	1.66417	8.77524	0.0599732	0.997806
AlRepE-2863	Unknown	Unknown	-1.75243	-1.79321	5.40353	0.361388	0.997806
AlRepE-2882	Unknown	Unknown	-1.02809	-1.03618	5.78685	0.58513	0.997806
AlRepE-294	Unknown	Unknown	0.398437	0.39935	7.93218	0.650578	0.997806
AlRepE-2962	Unknown	Unknown	-1.38984	-1.39409	7.38515	0.19788	0.997806
AlRepE-299	Unknown	Unknown	0.523214	0.524064	9.65538	0.601487	0.997806
AlRepE-2999	Unknown	Unknown	-2.53981	-2.59039	5.43726	0.152247	0.997806
AlRepE-3023	Unknown	Unknown	0.732911	0.73593	7.33972	0.449724	0.997806
AlRepE-3028	CMC-EnSpm	DNA	-2.90668	-2.95974	5.44294	0.16019	0.997806
AlRepE-3031	TcMar-Tc1	DNA	1.1032	1.10661	7.24013	0.343864	0.997806
AlRepE-3032	hAT-Blackjack	DNA	-0.180196	-0.179721	6.03749	0.931314	0.997806
AlRepE-305	Unknown	Unknown	0.720227	0.719949	6.54146	0.639474	0.997806
AlRepE-307	Unknown	Unknown	-0.903163	-0.907626	6.69399	0.448497	0.997806
AlRepE-3082	hAT-Charlie	DNA	-2.08579	-2.10437	6.02076	0.294525	0.997806
AlRepE-3131	DNA	DNA	-0.0207857	-0.0209762	8.36951	0.979582	0.997806
AlRepE-3165	Unknown	Unknown	-1.31165	-1.32638	5.74124	0.609237	0.997806
AlRepE-3269	rRNA	rRNA	0.699984	0.700981	8.44198	0.447562	0.997806
AlRepE-3325	Unknown	Unknown	0.442392	0.447719	5.28226	0.775138	0.997806
AlRepE-3334	PIF-Harbinger	DNA	3.41831	3.54769	4.48089	0.167234	0.997806
AlRepE-3342	Unknown	Unknown	0.56525	0.568178	6.67749	0.740332	0.997806
AlRepE-3364	Unknown	Unknown	0.388062	0.383232	5.112	0.822762	0.997806
AlRepE-3388	Unknown	Unknown	3.20638	3.41018	4.62417	0.129849	0.997806
AlRepE-3482	Helitron	RC	0.472319	0.472985	8.4066	0.536718	0.997806
AlRepE-351	L2	LINE	1.51924	1.52556	5.47568	0.530255	0.997806
AlRepE-3564	L1	LINE	-1.49796	-1.53038	5.5083	0.430618	0.997806
AlRepE-3576	LTR	LTR	2.82129	2.82314	9.68932	0.0639651	0.997806
AlRepE-3579	Unknown	Unknown	1.30352	1.33428	5.62605	0.445807	0.997806
AlRepE-3597	Unknown	Unknown	-0.0516499	-0.0514271	7.92656	0.969067	0.997806
AlRepE-3612	Unknown	Unknown	0.204045	0.204174	9.69735	0.750333	0.997806
AlRepE-3661	Unknown	Unknown	1.02379	1.0257	8.05662	0.272699	0.997806
AlRepE-368	Unknown	Unknown	-0.286765	-0.287884	6.22061	0.833206	0.997806
AlRepE-3776	DNA	DNA	0.0579558	0.0572229	6.58325	0.963879	0.997806
AlRepE-385	Unknown	Unknown	-1.97633	-1.98995	6.88413	0.190293	0.997806
AlRepE-3882	Unknown	Unknown	-1.349	-1.38111	4.72753	0.58109	0.997806
AlRepE-3921	Unknown	Unknown	-0.708467	-0.72996	4.7416	0.808146	0.997806
AlRepE-395	Unknown	Unknown	-3.5217	-3.59176	5.3498	0.047571	0.997806
AlRepE-3962	hAT-Ac	DNA	3.27876	3.30258	6.44698	0.0279639	0.997806
AlRepE-4	Unknown	Unknown	0.816813	0.818405	7.9442	0.31377	0.997806
AlRepE-4080	Unknown	Unknown	-0.0344155	-0.0344277	11.8178	0.947809	0.997806
AlRepE-4155	Unknown	Unknown	0.324264	0.324553	9.00429	0.690394	0.997806
AlRepE-4191	Unknown	Unknown	1.19276	1.2011	6.40777	0.386735	0.997806
AlRepE-42	Unknown	Unknown	-0.137318	-0.13743	9.86084	0.825924	0.997806
AlRepE-421	Unknown	Unknown	-1.12647	-1.12782	8.54939	0.341137	0.997806
AlRepE-431	L2	LINE	-0.410029	-0.410329	8.89895	0.670118	0.997806
AlRepE-436	Unknown	Unknown	1.85305	1.86951	6.26256	0.315183	0.997806
AlRepE-4384	Rex-Babar	LINE	-2.98528	-2.995	7.48011	0.0113384	0.997806
AlRepE-4385	Unknown	Unknown	-2.19249	-2.20372	6.87142	0.113791	0.997806
AlRepE-445	Unknown	Unknown	1.08439	1.09457	5.79922	0.44854	0.997806
AlRepE-4614	Unknown	Unknown	1.12036	1.12318	8.04834	0.492367	0.997806
AlRepE-463	Unknown	Unknown	-0.163963	-0.169196	4.9261	0.941532	0.997806
AlRepE-474	Unknown	Unknown	2.02571	2.04253	6.24257	0.328562	0.997806
AlRepE-4744	Unknown	Unknown	0.20317	0.20311	8.63337	0.824895	0.997806
AlRepE-481	Unknown	Unknown	-1.65655	-1.67746	5.49992	0.384198	0.997806
AlRepE-4827	Unknown	Unknown	-1.44522	-1.48483	5.08187	0.442444	0.997806
AlRepE-50	Unknown	Unknown	0.0926433	0.0928323	8.15252	0.906117	0.997806
AlRepE-5054	Unknown	Unknown	-0.20365	-0.204038	7.56942	0.829968	0.997806
AlRepE-5091	Unknown	Unknown	-0.545687	-0.546402	9.02241	0.502709	0.997806
AlRepE-528	Unknown	Unknown	4.94962	5.37696	4.57894	0.0979897	0.997806
AlRepE-541	Unknown	Unknown	0.105607	0.10674	7.3057	0.927766	0.997806
AlRepE-5440	L1	LINE	2.01636	2.03478	5.98856	0.302646	0.997806
AlRepE-5455	L1-Tx1	LINE	0.305082	0.305856	7.61536	0.775797	0.997806
AlRepE-5457	Unknown	Unknown	0.631056	0.633152	7.39911	0.57928	0.997806
AlRepE-5532	Unknown	Unknown	-0.175697	-0.179705	6.14869	0.908749	0.997806
AlRepE-554	Unknown	Unknown	0.2508	0.250942	6.47884	0.842208	0.997806
AlRepE-5547	Rex-Babar	LINE	0.357551	0.358012	8.49087	0.677062	0.997806
AlRepE-5617	Unknown	Unknown	0.426038	0.426409	9.20664	0.614265	0.997806
AlRepE-5654	Unknown	Unknown	-4.45973	-4.6222	4.78906	0.0514364	0.997806
AlRepE-5764	hAT-Charlie	DNA	-1.58639	-1.63571	5.36144	0.497387	0.997806
AlRepE-584	Unknown	Unknown	3.04592	3.0763	6.17873	0.0454442	0.997806
AlRepE-5869	Unknown	Unknown	-2.49893	-2.55415	5.11412	0.284062	0.997806
AlRepE-588	Unknown	Unknown	-1.23791	-1.24863	6.40009	0.370951	0.997806
AlRepE-60	Unknown	Unknown	0.0374844	0.03741	7.38527	0.971453	0.997806
AlRepE-6016	Unknown	Unknown	0.439769	0.439395	6.34568	0.794589	0.997806
AlRepE-6034	L2	LINE	0.647626	0.671637	5.72639	0.709465	0.997806
AlRepE-6108	L2	LINE	-1.35731	-1.36021	7.87509	0.168842	0.997806
AlRepE-6122	Unknown	Unknown	-2.08189	-2.13407	4.80907	0.342937	0.997806
AlRepE-6137	Unknown	Unknown	0.176617	0.176661	11.0346	0.767087	0.997806
AlRepE-6153	Unknown	Unknown	2.14844	2.15947	6.82708	0.16389	0.997806
AlRepE-6157	Unknown	Unknown	-1.39284	-1.39765	7.11836	0.318494	0.997806
AlRepE-65	Unknown	Unknown	-0.129031	-0.129103	9.3537	0.878275	0.997806
AlRepE-659	TcMar-Tc1	DNA	0.938658	0.942337	5.98065	0.645823	0.997806
AlRepE-6760	Unknown	Unknown	2.86847	2.90522	5.66243	0.11021	0.997806
AlRepE-6770	Unknown	Unknown	1.3779	1.407	5.23874	0.617175	0.997806
AlRepE-684	Gypsy	LTR	-1.03052	-1.03606	6.85911	0.530785	0.997806
AlRepE-6871	RTE-BovB	LINE	3.34952	3.41417	5.42653	0.0919382	0.997806
AlRepE-6985	DNA	DNA	-0.224474	-0.226192	7.41009	0.827789	0.997806
AlRepE-715	Unknown	Unknown	-0.559047	-0.566555	5.21331	0.760119	0.997806
AlRepE-7227	Unknown	Unknown	-3.48344	-3.51661	6.05716	0.0984763	0.997806
AlRepE-7251	Unknown	Unknown	1.06126	1.0705	5.97767	0.42825	0.997806
AlRepE-7292	Unknown	Unknown	-0.314909	-0.321167	5.874	0.863541	0.997806
AlRepE-737	Unknown	Unknown	-0.610027	-0.613384	6.58164	0.689766	0.997806
AlRepE-7416	Gypsy	LTR	3.26309	3.33569	5.96587	0.0710024	0.997806
AlRepE-747	ERVK	LTR	-0.835192	-0.837194	7.45987	0.453027	0.997806
AlRepE-7493	Unknown	Unknown	1.89474	1.90766	6.49197	0.182857	0.997806
AlRepE-7565	Unknown	Unknown	-0.463844	-0.485196	5.27809	0.797362	0.997806
AlRepE-79	L2	LINE	0.828029	0.831275	5.21757	0.723898	0.997806
AlRepE-7955	Unknown	Unknown	0.135505	0.135274	7.12891	0.914042	0.997806
AlRepE-819	Unknown	Unknown	-2.081	-2.10787	5.36012	0.38471	0.997806
AlRepE-843	CMC-EnSpm	DNA	-2.07273	-2.09434	5.8606	0.304991	0.997806
AlRepE-8693	hAT-Tip100	DNA	0.394259	0.395037	8.0069	0.666311	0.997806
AlRepE-891	Unknown	Unknown	-3.62464	-3.72535	5.19261	0.0541784	0.997806
AlRepE-920	Unknown	Unknown	-0.18332	-0.183957	7.17842	0.863938	0.997806
AlRepE-95	Unknown	Unknown	2.12595	2.14542	6.14624	0.247652	0.997806
AlRepE-968	Unknown	Unknown	-1.411	-1.42824	4.54219	0.598507	0.997806
AlRepE-98	Unknown	Unknown	1.5863	1.60359	5.59367	0.344722	0.997806
AlRepE-983	R2-Hero	LINE	-1.77201	-1.78043	6.76637	0.152049	0.997806
AlRepE-993	Unknown	Unknown	-0.246163	-0.246258	10.1634	0.760083	0.997806
RNLTR11-int	ERVK	LTR	-1.24956	-1.46192	4.33671	0.663427	0.997806
RNLTR2d	ERVK	LTR	-0.668728	-0.670453	7.68536	0.459851	0.997806
RNNICER3-int	ERV1	LTR	-0.743807	-0.760348	4.69974	0.709079	0.997806
Ronin2_I-int	Gypsy	LTR	0.536187	0.538211	7.25784	0.708655	0.997806
Ronin3_I-int	Gypsy	LTR	0.68753	0.688301	8.76362	0.433921	0.997806
ROO_I-int	Pao	LTR	-0.888577	-1.28138	4.71175	0.651489	0.997806
RP5S	rRNA	rRNA	-0.0970867	-0.0988211	6.49968	0.935028	0.997806
RT1	R1	LINE	-0.801802	-0.80516	7.16635	0.412969	0.997806
[truncated: 189 more rows]

## Sheet: Male Gonad
Element	Family	Class	logFC.0	unshrunk.logFC.0	logCPM.-1	PValue.1	FDR.0
AlRepD-4130	hAT-Ac	DNA	2.74313	2.74493	8.31647	5.31506e-07	0.00140583
HEROTn	R2-Hero	LINE	-6.42465	-1.44269e+08	6.87537	3.37359e-06	0.00446157
7SLRNA	srpRNA	srpRNA	3.45125	3.45671	8.14732	7.36395e-06	0.00649255
P-27_HM	P	DNA	-2.5097	-2.51471	7.44394	1.66249e-05	0.0109932
AgaP15	P	DNA	-5.83136	-1.44269e+08	5.07891	3.64475e-05	0.0137775
Charlie16	hAT-Charlie	DNA	-5.72271	-1.44269e+08	6.92215	3.64622e-05	0.0137775
AlRepE-134	DNA	DNA	-2.93912	-2.98529	6.29664	3.43457e-05	0.0137775
ERV-4_CPB-I	ERV1	LTR	-2.90067	-2.98745	9.00618	9.29384e-05	0.0307278
Gypsy-10_GA-LTR	Gypsy	LTR	-2.60095	-2.6573	8.59956	0.000127742	0.0337877
AlRepE-2243	Unknown	Unknown	3.69899	3.73834	4.92755	0.000115176	0.0337877
CR1-20_CQ	CR1	LINE	-2.92966	-3.00509	7.67288	0.000165803	0.039868
Dada-1_ON	Dada	DNA	-3.17552	-3.30531	7.29024	0.000190824	0.0420608
Copia3-I_XT	Copia	LTR	-5.64427	-1.44269e+08	4.39307	0.000219778	0.0435563
AlRepD-3555	Unknown	Unknown	-4.58546	-5.0725	4.32486	0.000230544	0.0435563
Kiri-1_CQ	L2	LINE	-5.81299	-1.44269e+08	4.09101	0.000296311	0.0522495
TC1_XL	TcMar-Tc1	DNA	3.65765	3.74247	4.45162	0.000352455	0.0582652
Helitron-8_CGi	Helitron	RC	-2.40512	-2.43147	10.5271	0.000515394	0.0801892
hAT-9A_XT	hAT-Ac	DNA	-3.83077	-4.31046	6.96435	0.000652979	0.0863564
I-5B_AAe	I	LINE	-3.41491	-3.43409	11.6788	0.000596079	0.0863564
L1-15a_Lch	LINE	LINE	-5.02106	-1.44269e+08	5.17974	0.000645339	0.0863564
Chapaev-10_HM	CMC-Chapaev	DNA	-1.75018	-1.76482	7.5974	0.00089876	0.103357
Gypsy-87_AA-I	Gypsy	LTR	-1.66666	-1.67041	9.37629	0.000829569	0.103357
L1-33_ACar	L1	LINE	3.60215	3.68473	4.78998	0.00087477	0.103357
Mariner-N7_PBa	DNA	DNA	-3.03914	-3.28515	7.89377	0.00128306	0.141404
U3	snRNA	snRNA	-2.38444	-2.39863	5.4099	0.00144495	0.152876
hAT-3_LCh	DNA	DNA	-2.96958	-3.01211	4.80203	0.00162236	0.165044
CEMUDR2	MULE-MuDR	DNA	-6.1335	-1.44269e+08	3.99596	0.00168735	0.165298
Gypsy-8_CPB-I	Gypsy	LTR	5.21024	1.44269e+08	4.83136	0.00177359	0.167541
PTERV2b-int	ERV1	LTR	-4.62062	-1.44269e+08	6.21902	0.00188795	0.172194
Kolobok-2_Aplcal	Kolobok-Hydra	DNA	-5.65582	-1.44269e+08	4.14459	0.0019682	0.17353
BEL-1_CQ-I	Pao	LTR	-1.81979	-1.84109	7.13435	0.00222622	0.189947
DNA-3-5_DR	DNA	DNA	4.47131	4.92682	4.28999	0.00242014	0.191386
I-3_AC	I	LINE	-3.20819	-3.31756	5.09501	0.00260402	0.191386
MER50-int	ERV1	LTR	-2.45609	-2.49768	6.8655	0.00251886	0.191386
AlRepE-1110	Unknown	Unknown	1.35245	1.35257	10.5112	0.00260487	0.191386
Zisupton-3_DR	Zisupton	DNA	1.92909	1.93236	6.82712	0.00245746	0.191386
Tigger17	TcMar-Tigger	DNA	-4.62071	-1.44269e+08	4.06825	0.00336868	0.240815
L1-43_ACar	L1	LINE	-1.87926	-1.88992	6.57863	0.00387441	0.256195
NonLTR-1_DR	Retroposon	Retroposon	5.91368	1.44269e+08	3.6123	0.00384978	0.256195
AlRepC-299	Unknown	Unknown	2.44124	2.44811	6.45553	0.00380282	0.256195
HERV16-int	ERVL	LTR	-4.48007	-1.44269e+08	4.66686	0.00427129	0.26899
Mariner-6_CPB	TcMar-Tigger	DNA	-5.24139	-1.44269e+08	4.08774	0.00421611	0.26899
AlRepD-484	Unknown	Unknown	1.19294	1.19297	12.615	0.00448542	0.275906
TE-X-10_DR	TcMar-Tc1	DNA	3.32321	3.37848	5.14553	0.00483647	0.290738
Gypsy-28_DWil-I	Gypsy	LTR	-4.58485	-1.44269e+08	5.6614	0.00559285	0.326271
Helitron-2_DR	Helitron	RC	-1.00791	-1.00797	11.7463	0.00567427	0.326271
CR1-J2_Pass	CR1	LINE	-4.45759	-1.44269e+08	4.8247	0.00724133	0.399027
SFV1-15_AMi-I	ERV4	LTR	1.32627	1.32923	7.12146	0.00722094	0.399027
CR1-4_DK	CR1	LINE	3.98512	4.43059	4.01669	0.0077991	0.404483
DNA8-2_DR	hAT-Tip100	DNA	-3.16422	-3.40638	4.60401	0.00760818	0.404483
L1-79_DR	L1	LINE	-2.91412	-3.03209	4.34558	0.00776053	0.404483
Kolobok-2_AA	Kolobok-Hydra	DNA	-3.22276	-3.31075	4.00089	0.00898592	0.432141
L2-3_Cis	L2	LINE	-4.36155	-1.44269e+08	3.94134	0.00852807	0.432141
RMER17C-int	ERVK	LTR	-2.19133	-2.28354	7.80546	0.00874203	0.432141
AlRepE-8693	hAT-Tip100	DNA	-1.11755	-1.11935	8.83692	0.00891339	0.432141
BEL-622_AA-I	Pao	LTR	-1.80887	-1.84761	8.2593	0.010199	0.448436
CR1-5_DT	CR1	LINE	-5.01472	-1.44269e+08	3.91697	0.0112513	0.448436
CR1_Ele33	CR1	LINE	-2.73191	-2.83605	5.12523	0.0113219	0.448436
CR1-Y_Pass	CR1	LINE	1.93758	1.97168	5.62089	0.0104735	0.448436
DNA9TA1_DR	CMC-EnSpm	DNA	1.5245	1.52823	6.53733	0.0113593	0.448436
Gypsy-1_TCa-I	Gypsy	LTR	2.3053	2.32282	4.61956	0.0101649	0.448436
Gypsy34-I_AG	Gypsy	LTR	-4.91745	-1.44269e+08	3.74865	0.00971225	0.448436
Helitron-2_DVir	Helitron	RC	-4.27356	-1.44269e+08	5.67686	0.0105012	0.448436
Jockey-7_DAn	Jockey	LINE	-4.88511	-1.44269e+08	4.02274	0.0104903	0.448436
AlRepC-743	L2	LINE	-0.935472	-0.935815	9.00276	0.0108492	0.448436
AlRepD-1474	Unknown	Unknown	-0.926078	-0.926997	8.3484	0.0109614	0.448436
AlRepE-130	Gypsy	LTR	-1.34203	-1.34422	11.3238	0.0108061	0.448436
Gypsy-23-I_XT	Gypsy	LTR	-3.41387	-3.55898	4.38868	0.0118909	0.453613
hAT-9_LMi	hAT-Charlie	DNA	-1.59714	-1.60865	6.32977	0.0120049	0.453613
U2	snRNA	snRNA	-1.13809	-1.1387	7.88566	0.0119674	0.453613
L2_AC_11	L2	LINE	2.24966	2.25511	6.30158	0.0122515	0.45641
Dada-1_TN	Dada	DNA	2.83045	2.94507	5.332	0.013569	0.491643
HEL	Helitron	RC	-2.65482	-2.72802	5.5608	0.0134873	0.491643
BEL-621_AA-I	Pao	LTR	4.4186	1.44269e+08	3.72979	0.0154817	0.497524
DNA-2-32_DR	DNA	DNA	2.10539	2.12556	5.59132	0.0153576	0.497524
EnSpm-N3B_DR	CMC-EnSpm	DNA	1.49853	1.49937	7.93987	0.0149054	0.497524
Gypsy-92_AA-I	Gypsy	LTR	-3.66593	-3.93651	4.33658	0.0143792	0.497524
ISL2EU-8_CGi	PIF-ISL2EU	DNA	1.12196	1.12408	7.68752	0.0149274	0.497524
L1-53_DR	L1	LINE	-1.04103	-1.04144	10.5814	0.0142384	0.497524
Penelope-4_HM	Penelope	LINE	-3.14542	-3.60769	4.80078	0.015283	0.497524
AlRepE-1897	L2	LINE	1.98448	2.01861	5.08852	0.0140419	0.497524
AlRepE-968	Unknown	Unknown	-1.67828	-1.68943	5.73001	0.0156123	0.497524
TguLTRL2a7	ERVL	LTR	1.93327	1.9488	5.2207	0.0151877	0.497524
BEL-3_DTa-I	Pao	LTR	-4.5123	-1.44269e+08	5.23268	0.0166155	0.511821
Chaplin8_FR	hAT-Charlie	DNA	2.18056	2.20524	4.65707	0.0164377	0.511821
U8	snRNA	snRNA	-4.27403	-4.56153	3.69518	0.0166414	0.511821
hAT-2_SM	hAT-Charlie	DNA	-1.74215	-1.7509	6.09342	0.0173265	0.524439
hAT-8_DR	hAT-Tip100	DNA	1.85764	1.87299	4.9394	0.0174881	0.524439
Helitron-2N_DW	Helitron	RC	-2.93593	-3.18418	4.08805	0.0176465	0.524439
Crack-1_IS	L2	LINE	-4.06407	-1.44269e+08	4.93166	0.0190358	0.527163
DIRS-4N3_DR	Ngaro	LTR	-3.86676	-4.03817	3.56707	0.0188039	0.527163
DNA2-27_CGi	DNA	DNA	-2.38712	-2.61499	6.97695	0.0190839	0.527163
Gypsy-6_LH-I	LTR	LTR	4.96759	1.44269e+08	3.63592	0.0185734	0.527163
HelitronN-1_DPe	Helitron	RC	-1.27156	-1.27484	6.67448	0.0193326	0.527163
ISL2EU-7_CGi	PIF-ISL2EU	DNA	-2.44439	-2.53028	4.45805	0.0181825	0.527163
AlRepB-45	SINE	SINE	1.05073	1.05082	11.5146	0.0186835	0.527163
Sola1-4_CGi	Sola	DNA	3.32014	3.54831	5.00916	0.0191674	0.527163
CR1-20_NV	CR1	LINE	2.54165	2.57247	4.93389	0.0199474	0.530497
I-1_DP	I	LINE	3.76486	3.99707	4.78515	0.0197323	0.530497
AlRepD-3031	Unknown	Unknown	-1.0336	-1.03421	8.11271	0.0204577	0.530497
AlRepE-7623	hAT-Ac	DNA	-2.3075	-2.33942	4.81274	0.0202349	0.530497
TC1_FR3	TcMar-Tc1	DNA	0.764981	0.765002	12.7664	0.0203865	0.530497
ERV1-N6-I_DR	ERV1	LTR	0.91089	0.911333	7.99119	0.0210552	0.540691
BEL-37-LTR_DR	Pao	LTR	-3.63053	-3.72549	3.91987	0.0214878	0.541903
DNA8-23_DR	DNA	DNA	1.37516	1.3784	7.20558	0.022011	0.541903
AlRepD-945	hAT-Charlie	DNA	-2.10653	-2.125	4.78877	0.0220947	0.541903
RNERV14-int	ERVK	LTR	-3.00029	-3.25224	4.49925	0.0215745	0.541903
Tx1-5_FR	L1-Tx1	LINE	2.20129	2.2341	4.44648	0.0221269	0.541903
AlRepD-463	Unknown	Unknown	0.782038	0.782129	10.3281	0.0228018	0.55331
Gypsy-29_DPu-I	Gypsy	LTR	-2.29961	-2.38176	5.12741	0.0232906	0.560033
DNA6-4_DR	DNA	DNA	1.11086	1.11334	7.15368	0.0235839	0.561976
CR1-16_BF	CR1	LINE	-3.81598	-1.44269e+08	4.20924	0.0247521	0.577705
Kolobok-3_DR	Kolobok-T2	DNA	0.846101	0.846306	8.99976	0.0248992	0.577705
Mariner-59N1_HSal	DNA	DNA	-1.16335	-1.16796	6.43435	0.02482	0.577705
ERV1-2-I_BT	ERV1	LTR	-3.76932	-1.44269e+08	3.85831	0.0256666	0.579339
L1-3_LCh	LINE	LINE	-2.36847	-2.44331	4.28593	0.0260169	0.579339
LTR-14_Gav	ERV4	LTR	-1.93476	-1.95801	5.84569	0.0260648	0.579339
REX1-1_XT	Rex-Babar	LINE	0.982423	0.982652	10.7601	0.025961	0.579339
RTE-5_LCh	LINE	LINE	2.97619	3.0958	3.68646	0.0258322	0.579339
AlRepD-467	Helitron	RC	0.962637	0.963017	8.56932	0.0264866	0.583808
AlRepD-4889	Unknown	Unknown	-1.00832	-1.0096	8.13132	0.0272491	0.595652
Tx1-18_Lch	LINE	LINE	1.11105	1.11308	7.12825	0.0276663	0.599815
Gypsy-12_LH-I	LTR	LTR	2.98341	3.07921	5.55209	0.0293025	0.630123
Jockey-9_DPer	Jockey	LINE	1.63031	1.63917	5.64802	0.0303487	0.647357
HAT4_CI	hAT-Ac	DNA	-1.1073	-1.11161	8.281	0.0306369	0.648276
AlRepC-2883	Unknown	Unknown	-0.888437	-0.889058	8.33004	0.0312748	0.656522
Gypsy-8_AMi-LTR	Gypsy	LTR	-1.42845	-1.43836	6.11943	0.0318224	0.662758
CER15-1-I_CE	Pao	LTR	-3.40889	-1.44269e+08	4.76647	0.0336865	0.670533
ERV1-5_DR-I	ERV1	LTR	-4.06715	-1.44269e+08	3.9765	0.0341975	0.670533
ERV38_MD-int	ERV1	LTR	0.904996	0.906243	7.76255	0.0345779	0.670533
Gypsy-49_CGi-I	Gypsy	LTR	1.74126	1.75565	5.07101	0.0326134	0.670533
Mariner-13_SIn	DNA	DNA	1.71877	1.7272	5.87138	0.0346836	0.670533
MuDR-1_DR	MULE-NOF	DNA	-1.48081	-1.48662	6.64449	0.0330863	0.670533
AlRepD-1719	L2	LINE	-1.016	-1.01752	7.04539	0.034144	0.670533
AlRepD-4565	MULE-MuDR	DNA	-1.13986	-1.1436	6.26493	0.0343322	0.670533
AlRepE-1560	hAT	DNA	1.36626	1.36783	7.03203	0.0347308	0.670533
AlRepE-2717	Unknown	Unknown	-1.90852	-1.93226	5.12455	0.0329985	0.670533
AlRepD-1887	Unknown	Unknown	-2.44928	-2.48579	4.17879	0.0352337	0.675313
L1-47_DR	L1	LINE	-1.0289	-1.03067	8.39744	0.0359261	0.68363
Gypsy-23_CPB-I	Gypsy	LTR	1.25782	1.25976	6.44501	0.0364386	0.685028
Kiri-2_AAe	L2	LINE	1.72862	1.74344	6.02315	0.0365176	0.685028
Tx1-9_DR	L1-Tx1	LINE	-2.20831	-2.29078	6.24753	0.0369026	0.687376
BovBa-1_EF	RTE-BovB	LINE	2.7385	2.80374	3.88871	0.0390786	0.688225
Copia-11H_DR-LTR	Gypsy	LTR	-1.60376	-1.6142	7.15189	0.0377095	0.688225
DNA-1-7_DR	PIF-Harbinger	DNA	-1.68544	-1.72177	5.69354	0.0382665	0.688225
Gypsy-19_GA-I	Gypsy	LTR	-2.89003	-2.91865	4.61245	0.0389969	0.688225
IS3EU-5_DR	IS3EU	DNA	-1.60854	-1.61384	5.61924	0.0373162	0.688225
AlRepD-7574	Unknown	Unknown	-2.16024	-2.19248	4.24164	0.0384766	0.688225
tRNA-Pro-CCA	tRNA	tRNA	2.7988	2.91952	4.1814	0.0391157	0.688225
TUB1	tRNA	SINE	1.6861	1.69887	4.89407	0.0381837	0.688225
Tx1-45_DR	L1-Tx1	LINE	-2.36085	-2.43727	5.32689	0.03929	0.688225
BEL32-I_DR	Pao	LTR	1.65004	1.65571	6.03964	0.0401738	0.689129
Gypsy-124_AA-LTR	Gypsy	LTR	-1.49568	-1.51645	7.6814	0.039977	0.689129
Gypsy-13_DBi-I	Gypsy	LTR	2.43826	2.84343	6.13123	0.0406443	0.689129
Gypsy-21_DAn-LTR	Gypsy	LTR	2.45005	2.66452	4.24961	0.0403884	0.689129
hAT5-N1_GA	hAT-hAT5	DNA	-2.65672	-2.7304	4.42861	0.0396166	0.689129
Gypsy-101_AA-LTR	Gypsy	LTR	1.46919	1.49016	5.88294	0.0415334	0.699719
AlRepB-358	hAT-Ac	DNA	1.11507	1.11534	9.4435	0.0423944	0.705241
RTEX-19_CGi	RTE-X	LINE	-1.42279	-1.43461	5.61595	0.0422936	0.705241
BEL-3-I_XT	Pao	LTR	1.32883	1.3368	6.33085	0.0449081	0.705659
BEL-48_DRe-I	Pao	LTR	-2.6438	-2.72871	4.23865	0.0481749	0.705659
Chapaev-3_ACa	CMC-Chapaev	DNA	-2.47357	-2.52386	4.20911	0.0476299	0.705659
Daphne-19_SP	L2	LINE	-2.53159	-2.59473	5.36024	0.0485558	0.705659
GibRV1	ERVK	LTR	1.97454	1.99085	4.76711	0.0448387	0.705659
Gypsy-20-I_DR	Gypsy	LTR	-1.37685	-1.37798	7.46107	0.0462956	0.705659
Gypsy-34_DEl-I	Gypsy	LTR	-2.22311	-2.33469	5.16251	0.0432924	0.705659
Gypsy80-I_DR	Gypsy	LTR	3.74844	1.44269e+08	4.26126	0.0469507	0.705659
Kolobok-9_CGi	Kolobok-Hydra	DNA	-3.13283	-1.44269e+08	5.97962	0.0470136	0.705659
L1-32_XT	L1	LINE	-1.00835	-1.01134	7.27618	0.0481029	0.705659
L2-8_DR	L2	LINE	-2.13794	-2.16225	4.46647	0.0474934	0.705659
Mariner-35_SM	TcMar-Pogo	DNA	-1.89667	-1.98328	5.41138	0.0452543	0.705659
Mariner-N14_DR	TcMar-Tigger	DNA	0.802215	0.802621	8.17396	0.0447641	0.705659
MER4-int	ERV1	LTR	1.25778	1.26451	6.0796	0.0463282	0.705659
Polinton3_SM	Maverick	DNA	-3.38436	-1.44269e+08	3.75085	0.045386	0.705659
AlRepD-1283	ERV1	LTR	-1.06737	-1.06746	10.7492	0.0480552	0.705659
AlRepD-5518	Unknown	Unknown	-1.45707	-1.47025	6.92155	0.0484277	0.705659
AlRepE-277	Unknown	Unknown	-0.81135	-0.812236	8.30267	0.0435182	0.705659
AlRepE-3131	DNA	DNA	0.882349	0.882874	9.03817	0.0477492	0.705659
AlRepE-368	Unknown	Unknown	2.04877	2.07217	4.66833	0.0469421	0.705659
AlRepE-7955	Unknown	Unknown	-0.987575	-0.98948	7.75994	0.0444459	0.705659
Transib-6_AAe	CMC-Transib	DNA	0.975285	0.977859	8.18576	0.0447671	0.705659
tRNA-Ile-ATA	tRNA	tRNA	3.39707	1.44269e+08	4.53793	0.0427193	0.705659
BEL5-I_DR	Pao	LTR	1.66417	1.67274	5.59806	0.0489152	0.7069
AlRepD-2135	Unknown	Unknown	0.959817	0.960717	7.33806	0.049244	0.7069
AlRepE-3847	Unknown	Unknown	-1.079	-1.08484	6.64707	0.0494429	0.7069
AlRepE-5532	Unknown	Unknown	1.25856	1.26118	6.29732	0.0500854	0.712235
Copia-23_DPu-I	Copia	LTR	2.43095	2.47242	3.72093	0.0507818	0.713004
Gypsy-17_XT-I	Gypsy	LTR	-2.99126	-3.06372	3.79676	0.051156	0.713004
Gypsy6-I_DR	Gypsy	LTR	1.92674	1.9718	7.93968	0.0512177	0.713004
AlRepE-10970	Unknown	Unknown	-1.1953	-1.20008	6.24244	0.050863	0.713004
AlRepE-2094	Unknown	Unknown	-1.63572	-1.64004	5.89178	0.0516467	0.715212
BEL-41_AA-I	Pao	LTR	3.16889	1.44269e+08	5.54883	0.052539	0.715391
Chapaev3-2_PM	CMC-Chapaev-3	DNA	1.09851	1.10044	6.82039	0.0521664	0.715391
AlRepE-7416	Gypsy	LTR	-1.7938	-1.81897	5.02824	0.0525367	0.715391
RTEX-9_SK	RTE-X	LINE	-2.79198	-2.95172	3.57113	0.0527415	0.715391
BEL-40_DRe-I	Pao	LTR	2.21377	2.24069	4.63418	0.0535327	0.722418
piggyBac-N12_DR	PiggyBac	DNA	-1.1498	-1.15175	7.06767	0.0546846	0.734218
CR1-3_DWi	CR1	LINE	-3.56908	-1.44269e+08	3.84443	0.0574879	0.734567
ERV-6_LCh-I	LTR	LTR	-1.44662	-1.46562	6.28347	0.0550691	0.734567
Gypsy152-I_DR	Gypsy	LTR	-1.99049	-2.0095	5.03119	0.0567222	0.734567
Kolobok-7_CGi	Kolobok-Hydra	DNA	1.73734	1.81566	5.91953	0.056965	0.734567
L1-2B_Cpo	L1	LINE	-0.982968	-0.987338	8.61147	0.056442	0.734567
L1-60_DR	L1	LINE	3.18779	3.27333	4.53368	0.0562203	0.734567
AlRepC-1885	hAT	DNA	-0.975094	-0.978076	6.42294	0.0571442	0.734567
AlRepC-382	Unknown	Unknown	0.84926	0.849428	9.48337	0.0574728	0.734567
AlRepD-2942	L2	LINE	2.09864	2.12242	4.90653	0.0571536	0.734567
AlRepE-2999	Unknown	Unknown	-1.06969	-1.07616	6.95882	0.0555708	0.734567
BEL15-I_DR	Pao	LTR	-2.97713	-3.07467	3.66696	0.0581367	0.736306
hAT6-2N1_SP	hAT-Blackjack	DNA	-2.57437	-3.0076	4.22209	0.0581807	0.736306
EnSpm-22_HMa	CMC-EnSpm	DNA	-1.29416	-1.30119	6.15796	0.0591263	0.739111
Gypsy-36_DAn-I	Gypsy	LTR	-2.00135	-2.04505	4.99758	0.0589782	0.739111
Mariner-16_SIn	DNA	DNA	-1.80219	-1.8415	5.89834	0.0592407	0.739111
BEL-11_GA-I	Pao	LTR	-2.37916	-2.50587	3.92948	0.0597286	0.741701
L1-27_DR	L1	LINE	-1.57713	-1.58722	4.84636	0.0608258	0.751796
Jockey_Ele2	Jockey	LINE	2.1408	2.15529	4.81296	0.0612609	0.753651
BEL-647_AA-I	Pao	LTR	-3.04433	-1.44269e+08	4.42501	0.0615841	0.754121
BEL-2-LTR_XT	Pao	LTR	2.05293	2.06619	4.68394	0.064227	0.762905
Crack-1_DR	L2	LINE	-3.10699	-3.21282	3.56216	0.0630824	0.762905
DNA6-6_DR	DNA	DNA	0.656625	0.656797	9.38319	0.0637464	0.762905
L2-1_SIn	LINE	LINE	-1.08089	-1.0849	6.55347	0.0636042	0.762905
L2-47_DR	L2	LINE	2.17503	2.19544	4.49012	0.0646771	0.762905
LTR11a_MD	ERV1	LTR	1.81407	1.91506	6.50979	0.0646365	0.762905
Mariner-94_HSal	DNA	DNA	1.72374	1.74527	4.45691	0.0651858	0.762905
REX1_FS	Rex-Babar	LINE	2.04156	2.06896	4.03005	0.0629484	0.762905
AlRepD-984	Unknown	Unknown	-0.818674	-0.819814	8.91721	0.0646634	0.762905
AlRepE-1325	Unknown	Unknown	2.14909	2.1767	4.16261	0.0650882	0.762905
Gypsy-36_GA-I	Gypsy	LTR	-0.906454	-0.908432	9.00808	0.0662949	0.772467
SINE3_AFC	tRNA-Mermaid	SINE	0.715483	0.715924	9.92365	0.0675212	0.783305
Gypsy8-I_Dpse	Gypsy	LTR	0.996059	0.997976	7.7134	0.0680682	0.786203
BEL-48_AA-I	Pao	LTR	0.828504	0.828969	7.95514	0.0701682	0.786404
HAL1-2a_MD	L1	LINE	-2.98299	-3.0872	3.97246	0.0701724	0.786404
LINEX-2_DR	Retroposon	Retroposon	-1.99778	-2.04305	3.78965	0.0693631	0.786404
R1-4_DWi	R1	LINE	-1.03415	-1.03793	6.56817	0.0704642	0.786404
AlRepC-1672	hAT-Ac	DNA	-0.718758	-0.719573	9.50533	0.0702101	0.786404
AlRepD-4141	Unknown	Unknown	1.60758	1.61348	5.55261	0.0691969	0.786404
AlRepE-920	Unknown	Unknown	0.857502	0.859141	7.04214	0.068994	0.786404
TDR3	hAT-Charlie	DNA	0.821348	0.822592	7.20381	0.0694861	0.786404
AlRepE-1229	TcMar-Tc1	DNA	-0.642603	-0.642821	11.0414	0.0708884	0.787815
LTR14D_SS	ERVK	LTR	2.19039	2.22096	4.3757	0.0720914	0.797832
AlRepC-4009	Unknown	Unknown	1.69431	1.70374	5.16325	0.0738795	0.814214
BEL-30_CQ-LTR	Pao	LTR	1.69076	1.72341	5.39961	0.0753704	0.827198
Gypsy-68_AA-LTR	Gypsy	LTR	-2.46293	-2.51892	4.50691	0.0766261	0.827545
Gypsy-8_DPer-LTR	Gypsy	LTR	-1.86376	-1.90798	4.62923	0.0772793	0.827545
hAT-18_Crp	hAT-Charlie	DNA	1.65426	1.66605	5.34657	0.0766982	0.827545
Helitron-1_DR	Helitron	RC	1.91633	1.9477	4.83766	0.076009	0.827545
L1-17b_Lch	LINE	LINE	1.28734	1.29524	5.77775	0.0771467	0.827545
AlRepA-115	DNA	DNA	0.530436	0.530448	13.4892	0.0766613	0.827545
G4_DM	Jockey	LINE	2.61363	2.76728	4.90523	0.077741	0.829133
CR1-110_AAe	CR1	LINE	-1.6708	-1.69647	4.95545	0.0812284	0.832749
DNA-8-7_DR	hAT	DNA	-1.48244	-1.491	4.79135	0.0808345	0.832749
Gypsy-23-I_NVi	Gypsy	LTR	1.26367	1.27442	5.6175	0.0799706	0.832749
Gypsy-246_AA-I	Gypsy	LTR	0.684366	0.684785	8.46754	0.0796617	0.832749
Gypsy-71_CGi-I	Gypsy	LTR	1.25113	1.26046	5.74304	0.0797003	0.832749
Kiri-2_DTa	L2	LINE	-2.90861	-3.01226	3.87047	0.0807132	0.832749
L2-49_DR	L2	LINE	1.64262	1.65192	4.98029	0.0802436	0.832749
AlRepD-29	Unknown	Unknown	-0.723846	-0.724724	9.2592	0.0786977	0.832749
AlRepD-807	Rex-Babar	LINE	-0.9703	-0.972798	7.83269	0.080987	0.832749
AlRepE-1213	L2	LINE	0.882536	0.883747	7.285	0.0804743	0.832749
CryptonV-2_DR	Crypton-V	DNA	1.01909	1.02314	6.64513	0.0823737	0.841229
CR1-37_DR	L2	LINE	-0.957098	-0.964133	9.4614	0.0837281	0.84427
Harbinger-1_DR	PIF-Harbinger	DNA	0.693929	0.694373	8.0347	0.0830465	0.84427
AlRepD-1554	L2	LINE	-1.07759	-1.08143	5.76186	0.0840946	0.84427
AlRepD-2414	Gypsy	LTR	-0.763655	-0.764898	7.34997	0.0842674	0.84427
Tc1-13_Xt	TcMar-Tc1	DNA	-0.714654	-0.715089	8.75803	0.0838289	0.84427
BEL-176_AA-I	Pao	LTR	-1.51274	-1.56899	7.82307	0.0861067	0.847161
Gypsy105-I_Dr	Gypsy	LTR	-3.01032	-1.44269e+08	4.11593	0.0855048	0.847161
Gypsy-38_CGi-I	Gypsy	LTR	1.88652	1.93649	4.59272	0.0855489	0.847161
AlRepD-808	PIF-Harbinger	DNA	-0.985248	-0.987378	6.17668	0.0848801	0.847161
AlRepE-3364	Unknown	Unknown	1.44677	1.45859	5.32351	0.0864777	0.847161
SAT-7_DR	Satellite	Satellite	0.69501	0.695578	8.84223	0.0861689	0.847161
DNA8-15_CQ	DNA	DNA	0.984992	0.988542	6.92247	0.0871742	0.850834
AlRepE-1471	Unknown	Unknown	-0.847586	-0.848575	7.67799	0.0888254	0.863761
Mariner-9_DF	TcMar-Tc1	DNA	2.31165	2.34204	4.15436	0.0904892	0.865643
AlRepB-124	DNA	DNA	0.494835	0.494846	12.7691	0.0906552	0.865643
AlRepD-8121	L2	LINE	1.55128	1.5582	5.47435	0.0902145	0.865643
AlRepE-431	L2	LINE	-0.798664	-0.800372	7.25687	0.0905041	0.865643
Tx1-8_SK	L1-Tx1	LINE	2.45867	2.56451	3.84359	0.090544	0.865643
AlRepD-57	Unknown	Unknown	0.755487	0.755883	8.7424	0.0912475	0.868164
AlRepD-990	ERV1	LTR	-0.85507	-0.855152	10.9823	0.0927839	0.879618
Gypsy-10_Crp-I	Gypsy	LTR	2.78909	1.44269e+08	3.89145	0.0973302	0.887181
Gypsy-17_DAn-I	Gypsy	LTR	1.63154	1.65142	4.85946	0.0969116	0.887181
Jockey-3_DGri	Jockey	LINE	0.739667	0.740069	8.63025	0.0959682	0.887181
L1-14_DR	L1	LINE	-1.70682	-1.72148	4.34569	0.0957043	0.887181
L2-3_DRe	L2	LINE	0.882338	0.882554	9.44449	0.0970272	0.887181
Nimb-2_DR	I	LINE	-1.19476	-1.2093	5.3928	0.095108	0.887181
Outcast-1_DT	Jockey	LINE	2.23566	2.37225	4.66472	0.0972576	0.887181
Rex1-53_DR	Rex-Babar	LINE	-2.28796	-2.70313	5.17866	0.0949582	0.887181
AlRepD-1575	hAT	DNA	0.794424	0.797611	7.25725	0.0964514	0.887181
AlRepE-2127	Unknown	Unknown	-0.70008	-0.700662	8.38992	0.0968011	0.887181
Sola2-5_HM	Sola	DNA	2.10381	2.13175	4.07388	0.0976067	0.887181
TZF28	TcMar-Tc1	DNA	1.25897	1.27444	6.0371	0.0945936	0.887181
Gypsy-16_AMi-LTR	Gypsy	LTR	-1.13151	-1.13655	6.13931	0.0991726	0.894809
L1-32_DR	L1	LINE	1.14484	1.14817	6.30226	0.0994608	0.894809
AlRepD-1636	Unknown	Unknown	0.946142	0.946845	7.44204	0.0992181	0.894809
BEL-6_GA-LTR	Pao	LTR	1.82582	1.84912	3.83443	0.101917	0.901572
DNA-8-3_DR	DNA	DNA	-0.684246	-0.684867	8.23963	0.101735	0.901572
AlRepD-850	Rex-Babar	LINE	-0.736657	-0.73767	6.96743	0.101315	0.901572
AlRepE-2537	PiggyBac	DNA	1.31208	1.3202	5.11758	0.100652	0.901572
SINEU-3B_Croc	U	SINE	-1.89642	-1.90728	4.87237	0.101517	0.901572
TART_DV	Jockey	LINE	0.827795	0.828108	8.79586	0.10243	0.903095
Gypsy-180_AA-I	Gypsy	LTR	-2.3069	-2.72145	4.32988	0.10391	0.913092
DNA-TA-4_NV	TcMar-Tc2	DNA	-2.46703	-2.88798	3.96968	0.104846	0.913395
AlRepD-2327	hAT	DNA	-0.589641	-0.590056	9.11087	0.104631	0.913395
AlRepD-2733	Unknown	Unknown	-0.783768	-0.784719	7.94528	0.10498	0.913395
BEL-38_CQ-I	Pao	LTR	-2.08697	-2.11651	3.98929	0.107	0.924889
PRIMA4-int	ERV1	LTR	0.899725	0.901128	6.86094	0.106872	0.924889
Gypsy-33_GA-I	Gypsy	LTR	0.655025	0.656533	7.77227	0.107514	0.9263
Academ-2_SK	Academ	DNA	1.20971	1.22323	5.13165	0.108448	0.931315
AlRepD-3038	Rex-Babar	LINE	0.735093	0.735974	7.53791	0.109095	0.933841
hATm-2_SM	hAT-hATm	DNA	-2.22689	-2.45011	3.81558	0.10983	0.936328
L1-61_ACar	L1	LINE	1.26195	1.27683	4.98539	0.110094	0.936328
LatiHarb1-2	DNA	DNA	0.794733	0.795347	7.62837	0.111596	0.944027
piggyBac-N11_DR	PiggyBac	DNA	1.81715	1.84001	4.2778	0.111713	0.944027
Chapaev-1_NV	CMC-Chapaev	DNA	1.94002	1.9667	4.21224	0.113004	0.945868
LatiHarb1-1	DNA	DNA	1.22541	1.2363	5.10604	0.112818	0.945868
Mariner-7_DR	TcMar-Tc1	DNA	2.79125	2.8489	4.27689	0.112618	0.945868
BEL-199_AA-I	Pao	LTR	1.81147	1.85917	4.82931	0.113552	0.947461
L1-43_DR	L1	LINE	2.03399	2.05056	4.57854	0.116135	0.952478
AlRepD-195	Unknown	Unknown	-0.800281	-0.801582	7.02523	0.116314	0.952478
AlRepD-4584	Unknown	Unknown	-0.644452	-0.644983	10.7772	0.114962	0.952478
AlRepE-983	R2-Hero	LINE	1.53135	1.54313	4.82979	0.115544	0.952478
SAT-1_AMi	Satellite	Satellite	0.531062	0.531098	11.6811	0.114862	0.952478
Tx1-8_BF	L1-Tx1	LINE	-2.02642	-2.42595	5.60755	0.115736	0.952478
Polinton-2_NV	Maverick	DNA	-1.43842	-1.45553	5.28736	0.1172	0.953826
AlRepD-580	Unknown	Unknown	1.08826	1.09365	5.45591	0.117032	0.953826
7SK	RNA	RNA	1.50967	1.51494	5.33632	0.119116	0.954736
Gypsy-9_Crp-I	Gypsy	LTR	1.11153	1.11893	5.60977	0.119097	0.954736
MER31-int	ERV1	LTR	-0.778552	-0.781177	9.24856	0.117885	0.954736
REX5	L2	LINE	-0.789024	-0.790357	6.70725	0.118788	0.954736
AlRepC-71	Unknown	Unknown	-0.663681	-0.664346	8.56199	0.118335	0.954736
AlRepE-1352	Unknown	Unknown	-1.13828	-1.14497	6.40887	0.120108	0.956887
Tigger10	TcMar-Tigger	DNA	1.36973	1.37876	4.54579	0.120036	0.956887
BEL-9_LH-I	LTR	LTR	-1.70637	-1.84068	5.88422	0.120645	0.958277
hAT-22_HM	hAT-Tip100	DNA	-1.45952	-1.51431	5.81184	0.122629	0.963535
hAT-2n1_DR	hAT-Charlie	DNA	0.661765	0.66277	7.43032	0.122764	0.963535
hAT-8_PM	hAT-Charlie	DNA	-0.877511	-0.878511	7.11691	0.121801	0.963535
AlRepD-677	Unknown	Unknown	0.695208	0.696468	7.19092	0.122438	0.963535
BEL-4_DBi-I	Pao	LTR	-1.76497	-1.81575	4.50153	0.124887	0.964236
BEL-62_CQ-I	Pao	LTR	-1.67415	-1.70076	4.76536	0.127073	0.964236
CSINE3A	tRNA-C	SINE	-1.21402	-1.22944	5.2902	0.126539	0.964236
Dada-U6_SS	Dada	DNA	-0.832043	-0.834743	7.11042	0.124774	0.964236
DNA-X-12_DR	DNA	DNA	-0.587705	-0.587772	10.3103	0.130511	0.964236
DNA-X-16_DR	DNA	DNA	-0.6514	-0.652152	8.65636	0.125254	0.964236
EnSpm-5_DR	CMC-EnSpm	DNA	0.607528	0.6079	9.72327	0.124534	0.964236
Gypsy-11_DTa-LTR	Gypsy	LTR	0.731264	0.733701	7.10484	0.127534	0.964236
Gypsy122-I_DR	Gypsy	LTR	-2.05652	-2.20534	3.87829	0.130698	0.964236
Gypsy15-I_SP	Gypsy	LTR	-1.36192	-1.3819	5.77049	0.128538	0.964236
hAT-30_SM	hAT-Tip100	DNA	-1.56105	-1.57556	4.52664	0.128276	0.964236
I-3_CQ	I	LINE	1.89964	1.93063	4.53259	0.124194	0.964236
L1-1_ME	L1	LINE	2.12259	2.22145	4.90258	0.130367	0.964236
LTRX1-I_XT	Copia	LTR	-0.736844	-0.737107	11.6249	0.130874	0.964236
AlRepC-3303	Unknown	Unknown	-0.653905	-0.654169	8.77419	0.126151	0.964236
AlRepC-46	Unknown	Unknown	-0.631257	-0.632099	8.99411	0.130416	0.964236
AlRepD-1439	SINE	SINE	0.615356	0.615856	8.02238	0.129519	0.964236
AlRepE-2393	hAT-Charlie	DNA	-0.651977	-0.652631	8.29804	0.12842	0.964236
AlRepE-3882	Unknown	Unknown	-0.899437	-0.900108	7.41622	0.123559	0.964236
AlRepE-528	Unknown	Unknown	1.17885	1.18481	6.61385	0.130089	0.964236
TDR8C	DNA	DNA	-1.14676	-1.15502	5.82122	0.128535	0.964236
TguERV1_LTR1c	ERV1	LTR	2.04994	2.09752	3.99369	0.128773	0.964236
BEL-18_CQ-I	Pao	LTR	1.36369	1.36914	5.27346	0.132027	0.964481
DIRS-1E-LTR_DR	Ngaro	LTR	0.712634	0.713923	7.23026	0.13584	0.964481
DNA2-18_CGi	TcMar-Tc2	DNA	1.979	1.99827	4.5626	0.132308	0.964481
ERV13_MD_I-int	ERV1	LTR	-1.37191	-1.37582	5.85125	0.135339	0.964481
ERV-2_Crp-LTR	ERV1	LTR	-0.977418	-0.984945	5.71534	0.145269	0.964481
Expander2	RTE	LINE	0.740333	0.741513	7.79574	0.140127	0.964481
Gypsy149-I_DR	Gypsy	LTR	-1.93558	-1.95638	4.35374	0.139518	0.964481
Gypsy19-I_SP	Gypsy	LTR	-2.2262	-2.64061	3.9903	0.144418	0.964481
Gypsy-23-I_DR	Gypsy	LTR	-1.8661	-1.89883	5.82794	0.134466	0.964481
Gypsy-24_PBa-I	LTR	LTR	1.72776	1.76032	4.19672	0.146222	0.964481
Gypsy-2B_Gav-LTR	Gypsy	LTR	1.11328	1.11646	5.5964	0.139282	0.964481
Gypsy-46_GA-I	Gypsy	LTR	0.95228	0.955363	6.56025	0.141289	0.964481
Gypsy-63_CQ-I	Gypsy	LTR	-0.877126	-0.880207	6.62806	0.145988	0.964481
Gypsy-9_GA-I	Gypsy	LTR	-1.5354	-1.54773	4.58604	0.142158	0.964481
Harbinger-N2_NV	PIF-Harbinger	DNA	-1.51288	-1.55119	5.10685	0.132642	0.964481
hAT-N108_DR	hAT-Ac	DNA	1.08435	1.08939	5.17254	0.142699	0.964481
HATN16_DR	hAT-Charlie	DNA	-1.66047	-1.68935	3.99337	0.141933	0.964481
hATN-4_ACar	hAT-Charlie	DNA	1.23	1.24585	6.21246	0.143985	0.964481
hAT-N68_DR	hAT-Ac	DNA	0.853878	0.857115	7.24652	0.140846	0.964481
Helitron-N18_CGi	Helitron	RC	1.13758	1.14386	5.46382	0.144612	0.964481
ISL2EU-1_LHu	DNA	DNA	-1.04217	-1.05853	5.6263	0.133313	0.964481
L1-33_DR	L1	LINE	-1.71919	-1.74658	4.23075	0.141817	0.964481
L1-67_DR	L1	LINE	1.272	1.27682	5.43947	0.145321	0.964481
MSAT_MG	Satellite	Satellite	1.06095	1.06876	6.19691	0.138387	0.964481
PiggyBac-1_HM	PiggyBac	DNA	2.05965	2.107	3.32926	0.145244	0.964481
REX1-8_DR	Rex-Babar	LINE	-1.35674	-1.38266	5.37672	0.132989	0.964481
AlRepC-1250	Unknown	Unknown	-0.537252	-0.537421	10.0561	0.144926	0.964481
AlRepC-513	PIF-ISL2EU	DNA	-0.636309	-0.636406	9.71004	0.139154	0.964481
AlRepD-143	Unknown	Unknown	-1.13529	-1.14485	4.72413	0.139554	0.964481
AlRepD-1571	Rex-Babar	LINE	-1.08785	-1.10164	5.5495	0.143433	0.964481
AlRepD-1644	Unknown	Unknown	0.734458	0.735541	7.46644	0.132475	0.964481
AlRepD-297	Unknown	Unknown	0.84535	0.847184	6.25459	0.137746	0.964481
AlRepD-3287	hAT-hAT5	DNA	-0.811269	-0.812291	7.16544	0.14172	0.964481
AlRepD-508	Unknown	Unknown	-0.552547	-0.553382	9.43718	0.136936	0.964481
AlRepD-816	PiggyBac	DNA	0.834826	0.837413	5.80705	0.137947	0.964481
AlRepD-92	Unknown	Unknown	0.705655	0.705933	9.61553	0.138527	0.964481
RTAg4	R1	LINE	0.604161	0.604245	10.8922	0.135043	0.964481
Tigger6	TcMar-Tigger	DNA	-0.647794	-0.648275	9.57361	0.138914	0.964481
TOL2_OL	hAT-Ac	DNA	-1.6451	-1.70554	4.08351	0.137959	0.964481
Transib-6_DRh	CMC-Transib	DNA	1.35159	1.35652	5.21298	0.136863	0.964481
Tx1-1C_CPB	L1-Tx1	LINE	-0.733394	-0.734359	8.89269	0.142724	0.964481
Zisupton-4_DR	Zisupton	DNA	1.18632	1.19282	5.54925	0.145664	0.964481
AlRepB-304	Unknown	Unknown	-0.513782	-0.513891	10.6539	0.147521	0.970631
Copia-132_AA-I	Copia	LTR	-0.913408	-0.918075	7.23086	0.14843	0.973896
DIRS-11_XT	DIRS	LTR	-1.43582	-1.45446	5.0076	0.14949	0.973896
L1-54_DR	L1	LINE	1.34924	1.35752	4.6589	0.149088	0.973896
RLTR20C2_MM	ERVK	LTR	1.00954	1.01531	5.94704	0.149135	0.973896
TX1_FR1	L1	LINE	-0.789763	-0.791574	9.06937	0.150836	0.980252
Polinton-1_PBa	DNA	DNA	1.03266	1.03382	6.94594	0.152128	0.981759
AlRepC-845	PIF-Harbinger	DNA	0.549918	0.549955	10.8398	0.152316	0.981759
Tc1DR3_Xt	TcMar-Tc1	DNA	-1.22858	-1.23913	6.09979	0.152553	0.981759
Tx1-25_DR	L1-Tx1	LINE	1.08823	1.09692	5.08962	0.151673	0.981759
BTLTR1J4	ERVK	LTR	2.54402	2.66012	3.39832	0.159711	0.983923
Copia9-NVi_I-int	Copia	LTR	-0.660052	-0.660989	7.61084	0.161781	0.983923
CR1-2_DRh	CR1	LINE	-2.18868	-2.41833	4.46376	0.15497	0.983923
Dada-U1B_DR	Dada	DNA	-0.828993	-0.834583	7.00208	0.157629	0.983923
DIRS-13D_CPB	DIRS	LTR	1.6666	1.69381	3.71036	0.16167	0.983923
DNA2-14_DR	DNA	DNA	-1.54789	-1.56607	4.23319	0.155242	0.983923
DNA7-N2_DR	hAT-hAT6	DNA	0.985892	0.991713	6.12275	0.159848	0.983923
Gypsy-128_AA-I	Gypsy	LTR	-0.847047	-0.85032	7.30423	0.160525	0.983923
Gypsy-36_DPu-I	Gypsy	LTR	-1.3567	-1.36471	5.17255	0.161817	0.983923
L1-1_Pca	L1	LINE	1.35406	1.36283	5.45387	0.153812	0.983923
LTR16D_ML	ERVK	LTR	3.04675	3.26121	3.4116	0.156355	0.983923
Mariner-18_SIn	DNA	DNA	-1.47196	-1.48991	4.2774	0.157155	0.983923
Mariner-26_HSal	DNA	DNA	-1.29436	-1.32591	6.75185	0.153901	0.983923
Rex1-2_PM	Rex-Babar	LINE	-1.54741	-1.56662	4.51123	0.157834	0.983923
AlRepB-450	Unknown	Unknown	1.04368	1.0498	4.87936	0.160701	0.983923
AlRepD-3161	Unknown	Unknown	-0.879908	-0.882896	5.73813	0.161143	0.983923
AlRepD-488	Unknown	Unknown	1.82912	1.84951	4.85255	0.154215	0.983923
AlRepE-2377	CMC-EnSpm	DNA	1.68829	1.72555	3.91977	0.158286	0.983923
AlRepE-65	Unknown	Unknown	0.520255	0.520476	9.69192	0.157769	0.983923
AlRepE-715	Unknown	Unknown	-0.921832	-0.922566	7.41209	0.156234	0.983923
AlRepE-734	TcMar-ISRm11	DNA	-1.27356	-1.28533	4.58385	0.156424	0.983923
RTE-6_AMi	RTE-BovB	LINE	2.24623	2.33849	3.83102	0.154409	0.983923
Tx1-12_CGi	L1-Tx1	LINE	2.33643	1.44269e+08	4.28725	0.158475	0.983923
TZSAT	Satellite	Satellite	1.90301	1.93318	3.64169	0.159094	0.983923
CR1-29_BF	CR1-Zenon	LINE	1.63861	1.65847	3.98066	0.162623	0.985138
DIRS-1C_CPB	DIRS	LTR	-1.86837	-2.07689	4.54687	0.162762	0.985138
MuDr-1x_AP	MULE-MuDR	DNA	0.68834	0.689535	6.94807	0.164013	0.990447
BEL-232_AA-I	Pao	LTR	-1.52928	-1.57736	4.93845	0.169133	0.992716
Chaplin1_FR	hAT-Charlie	DNA	-2.03724	-2.08232	4.05017	0.167026	0.992716
DIRS-16_DR	Ngaro	LTR	-2.28109	-2.52121	5.54162	0.167826	0.992716
DNA4-32_CGi	DNA	DNA	-2.16475	-2.395	4.42128	0.17006	0.992716
FB4_DM	TcMar-Tc1	DNA	-2.23093	-2.30459	3.26747	0.171434	0.992716
Gypsy75-I_DR	Gypsy	LTR	-1.94821	-1.99309	3.46269	0.167123	0.992716
hAT-15_CPB	hAT-Tip100	DNA	1.62264	1.65517	4.89314	0.168096	0.992716
hAT-N5_ACar	hAT-Tip100	DNA	1.61586	1.63055	4.84524	0.170707	0.992716
HE1_MM	tRNA-V-CR1	SINE	1.53977	1.55618	4.60055	0.167674	0.992716
Helitron-N1_HSal	DNA	DNA	-1.14296	-1.17974	5.59296	0.17152	0.992716
IMPB_02	Satellite	Satellite	-0.962153	-0.967686	6.06811	0.166844	0.992716
L1-12_DR	L1	LINE	-0.869627	-0.872658	5.5745	0.171235	0.992716
Polinton-2_SP	Maverick	DNA	2.75988	2.97065	4.10287	0.166103	0.992716
RLTR20A4	ERVK	LTR	0.54361	0.54397	8.40031	0.171329	0.992716
AlRepB-250	DNA	DNA	0.563256	0.563322	10.4744	0.168676	0.992716
AlRepD-2376	Unknown	Unknown	0.710151	0.711104	7.13831	0.168975	0.992716
AlRepD-4279	Unknown	Unknown	0.719923	0.723769	8.28756	0.170085	0.992716
AlRepE-12844	Rex-Babar	LINE	-0.877935	-0.880542	5.94742	0.171269	0.992716
AlRepE-445	Unknown	Unknown	-0.942788	-0.94646	6.22874	0.171373	0.992716
Daphne-6_SPu	L2	LINE	0.948808	0.951958	5.69702	0.173783	0.99278
DNA2c_Lch	DNA	DNA	-1.25344	-1.26253	4.81694	0.173575	0.99278
hAT-11_DR	hAT-Tip100	DNA	-1.00434	-1.00723	5.53418	0.17317	0.99278
P-19_HM	P	DNA	-1.18652	-1.19626	5.20977	0.173269	0.99278
Polinton-3_HM	Maverick	DNA	1.08817	1.09104	6.5103	0.173523	0.99278
AlRepD-4293	Unknown	Unknown	-1.15735	-1.16801	5.36459	0.173273	0.99278
CR1-62_HM	CR1	LINE	-1.63971	-1.68364	4.29086	0.17998	0.99533
Dada-U6_OL	Dada	DNA	-1.81644	-1.84093	4.47342	0.174977	0.99533
DNA-1-2_DR	DNA	DNA	-0.975649	-0.9834	5.11534	0.179689	0.99533
ERV1-1-I_DR	ERV1	LTR	-0.72084	-0.721168	8.72231	0.175975	0.99533
Gypsy120-I_DR	Gypsy	LTR	1.67992	1.73078	4.43029	0.180251	0.99533
Gypsy-24_DEl-I	Gypsy	LTR	0.707069	0.709067	6.69127	0.177231	0.99533
Gypsy4-LTR_DR	Gypsy	LTR	-1.38043	-1.39075	4.47766	0.176977	0.99533
Gypsy-9_DMoj-LTR	Gypsy	LTR	1.78986	1.80973	4.03916	0.17762	0.99533
hAT-11_LCh	DNA	DNA	-0.990128	-0.994424	5.74577	0.175206	0.99533
Homo6	hAT-Pegasus	DNA	-1.48773	-1.50273	4.30411	0.177184	0.99533
L1-45_AAe	L1	LINE	1.2018	1.21783	5.22235	0.178947	0.99533
L1-59_DR	L1	LINE	-1.34683	-1.35314	5.16696	0.178756	0.99533
Mariner-N22_HSal	DNA	DNA	-0.791427	-0.795573	6.29871	0.179938	0.99533
AlRepD-7900	R2-Hero	LINE	-0.603061	-0.603364	8.07103	0.17574	0.99533
TC1_RP	TcMar-Tc1	DNA	0.538714	0.539051	8.64698	0.17939	0.99533
Tigger12A	TcMar-Tigger	DNA	1.23829	1.24531	4.77585	0.178511	0.99533
Gypsy118-LTR_DR	Gypsy	LTR	-0.73951	-0.741461	6.81686	0.181336	0.995499
Gypsy-217_DR-I	Gypsy	LTR	-2.01737	-2.10949	3.6263	0.18141	0.995499
Transib-16_HM	CMC-Transib	DNA	-1.947	-1.96856	4.08082	0.180907	0.995499
BovB_PMo	RTE-BovB	LINE	1.41181	1.42949	4.21897	0.182218	0.996775
CR1-22_DR	L2	LINE	-0.574445	-0.576093	8.91865	0.185116	0.996775
DNA-8-13_DR	hAT	DNA	-0.615686	-0.616721	8.17532	0.187635	0.996775
Gypsy63-I_DR	Gypsy	LTR	1.03004	1.03589	5.11612	0.185873	0.996775
hAT-4_DK	hAT-hobo	DNA	-1.25697	-1.29304	5.43974	0.185413	0.996775
L2-53_DR	L2	LINE	-0.595763	-0.596186	8.23567	0.18742	0.996775
Mariner-2_HM	TcMar-Fot1	DNA	-0.554352	-0.554833	10.6362	0.186305	0.996775
P-26_HM	P	DNA	-1.52657	-1.6249	5.80664	0.187309	0.996775
Rex1-52_DR	Rex-Babar	LINE	-0.617337	-0.617858	7.24812	0.185113	0.996775
AlRepD-1357	Unknown	Unknown	-0.858488	-0.858937	8.99203	0.185278	0.996775
AlRepD-1370	Unknown	Unknown	0.690696	0.691853	6.95116	0.18384	0.996775
AlRepD-2229	Penelope	LINE	-1.92616	-1.97487	4.51161	0.187673	0.996775
AlRepD-3491	Sola	DNA	1.86234	1.89296	4.18612	0.184822	0.996775
AlRepD-880	Unknown	Unknown	-0.547039	-0.54741	8.56492	0.186776	0.996775
AlRepE-3290	SINE	SINE	1.52708	1.54006	4.18722	0.183503	0.996775
AlRepE-3482	Helitron	RC	0.575561	0.57608	8.40823	0.183393	0.996775
Ag-Jock-1	Jockey	LINE	0.64674	0.647093	8.98797	0.19794	0.998148
Copia-8_CQ-I	Copia	LTR	0.966033	0.968665	5.62222	0.19728	0.998148
DNA2-7_DR	DNA	DNA	0.727994	0.731022	6.74284	0.191979	0.998148
DNA-8-27_DR	hAT-Ac	DNA	-1.08503	-1.10265	4.95857	0.191194	0.998148
EnSpm-16_DR	CMC-EnSpm	DNA	-0.695839	-0.696924	6.62574	0.190424	0.998148
ERV2N1-Mim_I-int	ERVK	LTR	-0.964893	-0.978636	6.74969	0.19446	0.998148
Ginger1-N1_DR	Ginger	DNA	1.22123	1.23306	4.75198	0.192399	0.998148
Gypsy-119_AA-LTR	Gypsy	LTR	1.26765	1.289	6.07732	0.196739	0.998148
Gypsy-69_PM-I	Gypsy	LTR	-0.536792	-0.537967	9.25616	0.190834	0.998148
Gypsy-6_GA-I	ERV1	LTR	-0.842556	-0.843023	7.93323	0.198071	0.998148
hAT-42_HM	hAT-Tip100	DNA	-0.875053	-0.88057	6.16185	0.189982	0.998148
L1-1_CPB	L1	LINE	0.870112	0.874122	5.68915	0.193471	0.998148
MdoLTR4-int	ERV1	LTR	1.21388	1.22471	4.92691	0.19812	0.998148
MuDR-1_SIn	DNA	DNA	-1.20301	-1.2142	4.8138	0.196582	0.998148
Odin-3	Odin	LINE	0.950466	0.953148	5.56598	0.197184	0.998148
Polinton-1_SPU	Maverick	DNA	-1.82045	-1.87313	3.80968	0.197228	0.998148
PVSAT	Satellite	Satellite	1.70493	1.73425	4.03825	0.196985	0.998148
AlRepC-1351	hAT-Ac	DNA	-0.494883	-0.495097	8.36049	0.191908	0.998148
AlRepC-1508	hAT-Charlie	DNA	-0.519924	-0.520269	8.53263	0.193061	0.998148
AlRepD-1609	Unknown	Unknown	-0.594868	-0.595728	8.47221	0.19671	0.998148
AlRepD-23	ERVK	LTR	-0.845659	-0.846952	7.5473	0.195738	0.998148
AlRepD-2446	Unknown	Unknown	-0.601356	-0.603117	7.27413	0.192507	0.998148
AlRepD-453	L1	LINE	-1.8762	-1.9302	3.83947	0.195066	0.998148
AlRepD-5346	Unknown	Unknown	1.45302	1.47277	4.26589	0.191244	0.998148
AlRepE-305	Unknown	Unknown	-0.551438	-0.551678	8.964	0.195991	0.998148
AlRepE-98	Unknown	Unknown	-0.949808	-0.954676	6.31126	0.195892	0.998148
SINE2-2_DR	tRNA-Mermaid	SINE	0.736008	0.737051	7.26767	0.192344	0.998148
CR1-24_DR	L2	LINE	-0.868963	-0.877142	6.06743	0.201227	0.999368
DIRS-13C_XT	DIRS	LTR	1.86632	1.92799	4.27475	0.202365	0.999368
DIRS-15B_DR	Ngaro	LTR	-0.614634	-0.615732	7.33104	0.203208	0.999368
DNA8-10_DR	hAT-Ac	DNA	-0.652232	-0.653233	7.08123	0.202385	0.999368
EnSpm-10_DR	CMC-EnSpm	DNA	-0.846863	-0.847778	6.92226	0.201142	0.999368
Gypsy-15_XT-I	Gypsy	LTR	2.12654	2.16075	3.92178	0.201712	0.999368
L2-1_PM	L2	LINE	-0.506572	-0.507087	9.07368	0.199242	0.999368
LTR2_Tbel	ERVK	LTR	0.553437	0.555255	7.47069	0.202819	0.999368
AlRepC-1068	hAT-Tip100	DNA	-1.41441	-1.42732	4.45988	0.202786	0.999368
AlRepD-5500	Unknown	Unknown	-0.769831	-0.771429	6.51156	0.203336	0.999368
AlRepD-586	Rex-Babar	LINE	-0.777435	-0.778621	6.77142	0.20346	0.999368
AlRepD-691	CR1-Zenon	LINE	-0.971033	-0.974332	5.66375	0.2027	0.999368
AlRepE-395	Unknown	Unknown	1.00723	1.01082	5.38783	0.201273	0.999368
AlRepE-7565	Unknown	Unknown	0.756332	0.757146	7.20746	0.203652	0.999368
5S-Sauria	5S-Sauria-RTE	SINE	0.152197	0.155285	3.93948	0.895862	1
Academ-1_CGi	Academ	DNA	0.0528341	0.0530285	7.10063	0.9111	1
Academ-1_GA	Academ	DNA	0.115275	0.115406	7.26806	0.83661	1
Academ-1_PM	Academ	DNA	-0.412211	-0.414192	6.53406	0.641624	1
Academ-1_SK	Academ	DNA	-0.711609	-0.718509	5.63606	0.405708	1
Academ-4_BF	Academ	DNA	-0.513859	-0.523864	4.06009	0.723004	1
Academ-4_SP	Academ	DNA	0.836125	0.8424	5.3319	0.26173	1
Academ-5_SK	Academ	DNA	0.230356	0.231101	7.32415	0.644925	1
Academ-5_SP	Academ	DNA	0.217936	0.218113	7.96062	0.686634	1
ACCORD2_I-int	Gypsy	LTR	-0.477804	-0.480219	8.25148	0.515968	1
AGAM2	CR1	LINE	-0.174293	-0.175264	4.76211	0.827149	1
AmnL2-1	L2	LINE	0.645432	0.651134	5.32854	0.422091	1
AnolisSINE2c	tRNA-Sauria	SINE	0.723016	0.726664	5.06999	0.360283	1
BARI_DM	TcMar-Tc1	DNA	-0.273948	-0.274985	6.59955	0.670899	1
BEL-10_DEl-I	Pao	LTR	0.535078	0.537146	6.40026	0.389773	1
BEL-10_GA-I	Pao	LTR	0.457339	0.4671	5.41894	0.66143	1
BEL-114_AA-I	Pao	LTR	-0.379981	-0.380438	6.60122	0.623863	1
BEL11-I_DR	Pao	LTR	0.20883	0.209448	5.79056	0.825778	1
BEL-130_AA-I	Pao	LTR	0.491829	0.675221	4.17724	0.744159	1
BEL-137_AA-LTR	Pao	LTR	-0.526833	-0.624306	6.37352	0.668416	1
BEL-13_Adi-I	Pao	LTR	0.463704	0.472672	7.06431	0.517529	1
BEL-13_DEl-I	Pao	LTR	0.614644	0.621964	5.78032	0.406661	1
BEL-13_LH-I	LTR	LTR	0.821331	0.825582	5.23438	0.290216	1
BEL-17_DEl-I	Pao	LTR	-0.58527	-0.587223	6.73894	0.314789	1
BEL18-I_DR	Pao	LTR	-0.694313	-0.695101	6.76407	0.37702	1
BEL-192_AA-I	Pao	LTR	-0.372165	-0.374557	4.91201	0.610709	1
BEL-1_DAn-I	Pao	LTR	-0.329641	-0.332803	4.85455	0.767409	1
BEL-1_DWil-I	Pao	LTR	-0.21683	-0.216933	8.85804	0.571628	1
BEL-1_GA-I	Pao	LTR	-0.807798	-0.809407	6.02663	0.221033	1
BEL1-I_Dya	Pao	LTR	0.605418	0.607817	5.19379	0.567332	1
BEL1-I_SM	Pao	LTR	-0.0313941	-0.0313954	12.5704	0.925955	1
BEL-1-I_XT	Pao	LTR	-0.549641	-0.555077	3.92973	0.667995	1
BEL-1_PBa-I	LTR	LTR	0.799548	0.810003	3.96224	0.512912	1
BEL-20_AA-I	Pao	LTR	0.276345	0.276438	9.13532	0.688555	1
BEL-214_AA-I	Pao	LTR	-0.239045	-0.240052	4.97521	0.812615	1
BEL25-I_DR	Pao	LTR	-0.128521	-0.129536	4.74277	0.903517	1
BEL-26_CQ-I	Pao	LTR	-0.512508	-0.518017	4.78514	0.592547	1
BEL27-I_DR	Pao	LTR	-0.0743595	-0.0746517	4.76807	0.927483	1
BEL-2_DEl-I	Pao	LTR	0.166574	0.166909	6.02006	0.776771	1
BEL31-I_DR	Pao	LTR	-0.872169	-0.87845	4.54196	0.455863	1
BEL31-LTR_DR	Pao	LTR	0.186979	0.187978	6.21245	0.779047	1
BEL32-LTR_DR	Pao	LTR	0.446028	0.447654	5.49421	0.726368	1
BEL-33_AA-I	Pao	LTR	0.190578	0.196801	4.24754	0.86089	1
BEL34-I_DR	Pao	LTR	0.293104	0.29516	4.37088	0.749211	1
BEL35-I_DR	Pao	LTR	0.33709	0.33897	4.59592	0.758097	1
BEL36-I_DR	Pao	LTR	0.281549	0.282763	5.07223	0.802404	1
BEL-37-I_DR	Pao	LTR	-0.371335	-0.374188	4.18564	0.757763	1
BEL-39_DRe-I	Pao	LTR	0.788594	0.792841	4.93254	0.36434	1
BEL-3_DBp-I	Pao	LTR	-0.435988	-0.489082	3.95541	0.810074	1
BEL-3_DPer-I	Pao	LTR	0.569247	0.588798	3.35901	0.802687	1
BEL-3_PM-I	Pao	LTR	-0.636498	-0.640446	4.50129	0.476909	1
BEL-40_AA-I	Pao	LTR	-1.00944	-1.02378	4.60966	0.302003	1
BEL-41_DRe-I	Pao	LTR	-0.566747	-0.567613	6.45694	0.462595	1
BEL-42_DRe-I	Pao	LTR	-1.34022	-1.36751	3.28463	0.379637	1
BEL-46_DRe-I	Pao	LTR	0.120296	0.121065	6.37535	0.87056	1
BEL-47_DRe-I	Pao	LTR	0.270351	0.272157	6.27593	0.650734	1
BEL-48_CQ-I	Pao	LTR	-0.309688	-0.310263	6.27092	0.684805	1
BEL-4_CSa-I	Pao	LTR	-0.864891	-0.903982	5.32636	0.496446	1
BEL-4_DTa-I	Pao	LTR	-0.553513	-0.562466	3.41908	0.647654	1
BEL-4_DWil-I	Pao	LTR	-0.70476	-0.70683	6.97347	0.290148	1
BEL-4_GA-I	Pao	LTR	0.41964	0.421494	5.22495	0.611109	1
BEL4-I_AG	Pao	LTR	0.327661	0.329303	5.58082	0.662581	1
BEL-50_CQ-I	Pao	LTR	-1.08704	-1.09813	4.58364	0.206705	1
BEL-50_DRe-I	Pao	LTR	-0.960596	-0.974208	4.95615	0.327895	1
BEL-51_DRe-I	Pao	LTR	0.331228	0.331278	9.73954	0.458903	1
BEL-57_CQ-I	Pao	LTR	-0.282498	-0.283204	8.34688	0.500354	1
BEL-57_DRe-I	Pao	LTR	-1.35707	-1.39793	3.46432	0.427165	1
BEL-58_DRe-I	Pao	LTR	0.0331292	0.0332012	6.14273	0.965998	1
BEL-592_AA-I	Pao	LTR	0.926749	0.947883	5.15425	0.493102	1
BEL-593_AA-I	Pao	LTR	-0.242875	-0.247414	5.72184	0.786389	1
BEL-59_DRe-I	Pao	LTR	0.00443107	0.0043907	5.81731	0.995335	1
BEL-5_DAn-LTR	Pao	LTR	-0.0998458	-0.102391	4.94083	0.941971	1
BEL-5_GA-I	Pao	LTR	0.108989	0.109703	4.52262	0.900733	1
BEL-609_AA-I	Pao	LTR	0.225086	0.225781	6.02631	0.714657	1
BEL-60_AA-I	Pao	LTR	-0.31334	-0.31508	6.09749	0.63954	1
BEL-60_DRe-I	Pao	LTR	-0.838597	-0.843798	4.67183	0.428473	1
BEL-611_AA-I	Pao	LTR	-1.07595	-1.09052	3.65206	0.454779	1
BEL-618_AA-I	Pao	LTR	0.455692	0.456657	6.08484	0.469331	1
BEL-61_DRe-I	Pao	LTR	1.1235	1.13355	4.73934	0.299782	1
BEL-645_AA-I	Pao	LTR	-0.692392	-0.709679	3.11218	0.679323	1
BEL-64_CQ-I	Pao	LTR	-0.667878	-0.682108	3.63302	0.665392	1
BEL-65_DRe-I	Pao	LTR	-0.453513	-0.46239	3.4602	0.758226	1
BEL-67_AA-I	Pao	LTR	1.43147	1.51432	3.8069	0.421711	1
BEL-6_Ano-I	Pao	LTR	0.0109193	-0.0119819	4.05951	0.9959	1
BEL-6_CGi-I	Pao	LTR	0.288388	0.29511	4.23184	0.843458	1
BEL-6_GA-I	Pao	LTR	0.860095	0.863897	5.10508	0.3314	1
BEL-7_AA-I	Pao	LTR	-0.222111	-0.224078	6.29492	0.719948	1
BEL-7_DPer-I	Pao	LTR	0	0	4.4493	1	1
BEL-7_DPu-I	Pao	LTR	0	0	5.47212	1	1
BEL-83_AA-I	Pao	LTR	1.01554	1.16278	3.75602	0.524535	1
BEL8-I_DR	Pao	LTR	-0.921793	-0.928862	5.75046	0.31073	1
BEL-9_DWil-I	Pao	LTR	-0.609805	-0.613439	7.1879	0.248808	1
BEL-9_GA-I	Pao	LTR	-0.496435	-0.499921	4.69347	0.569643	1
BELPADRE_I-int	Pao	LTR	-0.465317	-0.473496	3.48703	0.799833	1
BMSAT1	Satellite	Satellite	-0.789873	-0.792533	5.27574	0.33606	1
BovB_Gd	RTE-BovB	LINE	0.231717	0.231933	7.13609	0.652899	1
Bridge1_FR	Penelope	LINE	-0.34834	-0.348962	6.38	0.526428	1
Bridge1_TN	Penelope	LINE	0.182537	0.18263	8.15655	0.650317	1
Bridge2_Xena_	Penelope	LINE	-1.05082	-1.05555	5.15119	0.277865	1
BtERVF1_I-int	ERV1	LTR	0.390899	0.394241	6.10467	0.556181	1
CarERV2-int	ERV1	LTR	-0.61083	-0.621124	5.79581	0.55121	1
CASAT_HD	Satellite	Satellite	0.161664	0.161794	7.39211	0.734151	1
CATCH2LTR_DR	Pao	LTR	0.0266752	0.0267014	8.55904	0.952052	1
CER10-I_CE	Pao	LTR	0.978775	0.983072	5.27426	0.306616	1
CER2-1-LTR_CE	Pao	LTR	0.588063	0.589402	6.43153	0.285786	1
CER2-LTR_CE	Gypsy	LTR	0	0	4.041	1	1
Chapaev-11_HM	CMC-Chapaev	DNA	1.05255	1.10179	4.46594	0.367878	1
Chapaev3-1_HR	CMC-Chapaev-3	DNA	0.434388	0.434671	7.74867	0.382108	1
Chapaev-3_HM	CMC-Chapaev	DNA	0.752774	0.776596	3.62907	0.590441	1
Chapaev-3_NV	CMC-Chapaev	DNA	-0.0505114	-0.050635	7.01817	0.941078	1
Chapaev-6_HM	CMC-Chapaev	DNA	0.578433	0.583642	5.87127	0.370308	1
Chapaev-8_HM	CMC-Chapaev	DNA	0.663584	0.665802	6.00012	0.359558	1
Chapaev-N5_AAe	CMC-Chapaev	DNA	-0.307378	-0.311269	3.83085	0.835324	1
Chaplin1a_FR	hAT-Charlie	DNA	0.386841	0.388787	5.76869	0.650164	1
Chaplin1_DR	hAT-Charlie	DNA	-0.395599	-0.399411	4.8279	0.665418	1
Chaplin4_FR	hAT-Charlie	DNA	-0.498553	-0.50062	6.64617	0.396905	1
Chaplin5a_FR	hAT-Charlie	DNA	0.443402	0.449891	3.43004	0.802715	1
Chaplin5_FR	hAT-Charlie	DNA	-0.206828	-0.207677	5.11485	0.81527	1
Charlie17b	hAT-Charlie	DNA	0.188781	0.189194	6.76136	0.823884	1
Charlie8	hAT-Charlie	DNA	0.449803	0.449874	9.46273	0.269454	1
Chompy-1_AMi	PIF-Harbinger	DNA	0.0720065	0.0721719	6.10605	0.907387	1
Chompy-4_Crp	PIF-Harbinger	DNA	0.575348	0.577662	5.25192	0.481933	1
Chouto_I-int	Gypsy	LTR	0.0490433	0.0552316	4.00257	0.974401	1
CoeEFV-I	LTR	LTR	1.69964	1.82153	3.88075	0.313408	1
Copia11-NVi_I-int	Copia	LTR	0.13934	0.142154	4.27992	0.91826	1
Copia-13_CQ-I	Copia	LTR	0.412897	0.416982	7.34223	0.579554	1
Copia16-NVi_I-int	Copia	LTR	-0.616437	-0.628724	4.39703	0.619164	1
Copia-17_CQ-I	Copia	LTR	-0.234039	-0.234803	7.92407	0.601773	1
Copia-1_AC-I	Copia	LTR	0.0730263	0.0731529	8.16129	0.901698	1
Copia-1_Cfl-I	Copia	LTR	-0.197046	-0.200495	3.75591	0.893646	1
Copia-1_DTa-I	Copia	LTR	0.521467	0.528453	4.11647	0.65875	1
Copia1-I_DR	Copia	LTR	-0.451457	-0.463481	3.67747	0.76192	1
Copia-1-I_HS	Copia	LTR	-0.0944187	-0.0947487	7.87419	0.854123	1
Copia-27_DPu-I	Copia	LTR	-0.127845	-0.12835	7.65037	0.828302	1
Copia-2_Ano-I	Copia	LTR	1.37817	1.45869	3.85036	0.349602	1
Copia-2_Deu-I	Copia	LTR	0.646785	0.661067	4.0167	0.698855	1
Copia-3_DWil-I	Copia	LTR	0.102202	0.104713	4.80247	0.916428	1
Copia-3_GA-I	Copia	LTR	0.0545567	0.05471	5.90504	0.94144	1
Copia3-I_DR	Copia	LTR	-0.170455	-0.170749	7.0816	0.709247	1
Copia-45_AA-LTR	Copia	LTR	-0.291705	-0.293726	5.61551	0.744778	1
Copia5-I_DR	Copia	LTR	0.0242542	0.0242777	7.0869	0.960903	1
Copia-7_Ano-I	Copia	LTR	0.147619	0.151041	4.69876	0.902418	1
Copia-7-I_DR	Gypsy	LTR	0.589038	0.591338	8.40845	0.370897	1
Copia-9_Ano-I	Copia	LTR	1.02539	1.04048	5.74777	0.233065	1
CR1-10_DR	L2	LINE	-0.81002	-0.832511	3.72525	0.542039	1
CR1-12_DR	L2	LINE	-0.414027	-0.41542	5.97477	0.475206	1
CR1-18_BF	CR1	LINE	0.15606	0.156315	6.15376	0.829185	1
CR1-18_DR	L2	LINE	-0.0767283	-0.0770842	4.97992	0.947535	1
CR1-1_CPB	CR1	LINE	0.239344	0.239445	8.57788	0.630764	1
CR1-1_DBp	CR1	LINE	0.0835373	0.0830864	4.95629	0.936582	1
CR1-1_DVi	CR1	LINE	0.592057	0.598521	5.29626	0.53669	1
CR1-1_NV	L2	LINE	2.47422	2.70109	3.54366	0.227391	1
CR1-28_BF	CR1-Zenon	LINE	0.0541435	0.0547651	6.73117	0.926552	1
CR1-2_CQ	CR1	LINE	0.183345	0.18358	6.9333	0.763261	1
CR1-2_DAn	CR1	LINE	0.200402	0.201713	5.27959	0.829407	1
CR1-2_FR	Rex-Babar	LINE	-0.358892	-0.3591	7.89895	0.424689	1
CR1-2_IS	CR1	LINE	-0.125331	-0.126211	6.83843	0.850896	1
CR1-2_LCh	LINE	LINE	0.818009	0.852825	4.35367	0.494544	1
CR1-3c_LCh	LINE	LINE	-0.72744	-0.746313	4.3135	0.543451	1
CR1-3_FR	Rex-Babar	LINE	0.0783985	0.0784466	7.92502	0.852436	1
CR1-3_NV	CR1	LINE	0.462185	0.464814	4.48514	0.636403	1
CR1-44_DR	L2	LINE	-0.454619	-0.457828	5.67695	0.549294	1
CR1-46_HM	L2-Hydra	LINE	1.47767	1.49432	4.20638	0.205543	1
CR1-50_HM	CR1	LINE	-0.410989	-0.412546	5.89516	0.5354	1
CR1-51_DR	L2	LINE	0.125577	0.125732	7.27638	0.76803	1
CR1-59_AAe	CR1	LINE	1.25207	1.35454	4.56665	0.330929	1
CR1-5_CGi	CR1-Zenon	LINE	-1.16028	-1.244	6.05126	0.240892	1
CR1-61_HM	L2	LINE	-0.0328536	-0.0330564	4.8509	0.978248	1
CR1-66_HM	L2	LINE	0.758773	0.760774	5.96135	0.370255	1
CR1-69_HM	CR1	LINE	-0.16213	-0.163987	4.73908	0.842278	1
CR1-76_HM	CR1	LINE	-0.746874	-0.772085	4.05523	0.58658	1
CR1-79_HM	L2	LINE	-0.484724	-0.485659	7.56162	0.287635	1
CR1-80_HM	L2	LINE	-0.10761	-0.108024	6.51687	0.84887	1
CR1-89_HM	CR1	LINE	-0.126344	-0.126401	8.03156	0.776331	1
CR1_Ele11	CR1	LINE	0.177631	0.18039	3.5934	0.904239	1
CR1_Ele24	CR1	LINE	0.510085	0.510498	7.73199	0.27671	1
CR1_Ele42	CR1	LINE	-1.21187	-1.23447	3.33312	0.385539	1
CR1_Ele7	CR1	LINE	-0.59011	-0.601313	4.39202	0.686302	1
CR1-Y	CR1	LINE	-0.219142	-0.221131	4.03945	0.832076	1
Crack-1_PM	L2	LINE	0.892877	0.903311	4.3865	0.378298	1
Crack-23_BF	L2	LINE	1.42091	1.4392	3.82212	0.245186	1
Crack-26_AAe	L2	LINE	-1.00365	-1.04266	4.95456	0.352989	1
Crack-28_BF	L2	LINE	0.129499	0.131115	4.17087	0.901234	1
Crack-3_AAe	L2	LINE	-0.641819	-0.647726	5.38256	0.495393	1
Crack-3_DR	L2	LINE	0.403429	0.403711	8.9945	0.315448	1
Crack-7_BF	L2	LINE	-1.89827	-1.44269e+08	3.87862	0.254849	1
CryptonV-1_DR	Crypton-V	DNA	-0.956433	-0.95682	9.85158	0.231952	1
CryptonV-3_DR	Crypton-V	DNA	-0.217265	-0.217343	9.34555	0.558532	1
Dada-1_BF	Dada	DNA	0.315699	0.315972	8.58351	0.603031	1
Dada-1_NV	Dada	DNA	0.323519	0.326214	5.38785	0.742548	1
Dada-tA_OL	Dada	DNA	0.736569	0.73876	5.9545	0.238858	1
Dada-tL_DR	Dada	DNA	-0.149762	-0.149826	8.37863	0.728948	1
Dada-U6_DR	Dada	DNA	-0.209444	-0.21458	5.72737	0.843344	1
Dada-U6_GA	Dada	DNA	0.42662	0.434004	3.57721	0.749965	1
Daphne-18_HM	L2	LINE	0.129811	0.129917	8.20936	0.769877	1
Daphne-21_SPu	L2	LINE	-0.481388	-0.51015	5.55191	0.657065	1
Daphne-27_DRe	L2	LINE	-0.0259483	-0.0259587	8.43614	0.955763	1
Daphne-38_HMa	L2	LINE	0.0893731	0.0894948	7.87723	0.85861	1
Daphne-41_HMa	L2	LINE	-1.25273	-1.27606	4.74269	0.315715	1
Daphne-73_HMa	L2	LINE	0.419768	0.420617	7.40835	0.378979	1
DIRS-12_DR	DIRS	LTR	0.248143	0.251204	4.19507	0.843334	1
DIRS-13B_XT	DIRS	LTR	0.0961086	0.0966716	4.67938	0.926998	1
DIRS-13_DR	DIRS	LTR	0.571956	0.573	7.09668	0.251706	1
DIRS-15_DR	Ngaro	LTR	0.0884644	0.0885611	8.80616	0.815036	1
DIRS-16_NV	DIRS	LTR	1.43265	1.44854	4.67032	0.260796	1
DIRS-17_XT	DIRS	LTR	-0.0639969	-0.0641923	6.76048	0.91012	1
DIRS-1F-LTR_DR	Ngaro	LTR	-1.35794	-1.3773	4.21478	0.207487	1
DIRS1_FR	DIRS	LTR	-0.0290677	-0.029112	5.65695	0.968196	1
DIRS-1-LTR_DR	Ngaro	LTR	-0.246362	-0.247792	5.22637	0.752142	1
DIRS-22_ACar	DIRS	LTR	0.221469	0.221644	7.50665	0.624787	1
DIRS-23_NV	Ngaro	LTR	0.99308	1.06535	4.58496	0.415596	1
DIRS-24_ACar	DIRS	LTR	1.07208	1.07712	5.03449	0.217252	1
DIRS-25_XT	DIRS	LTR	-0.457748	-0.463715	3.7842	0.763362	1
DIRS-26_XT	DIRS	LTR	0.899316	0.939438	4.90922	0.408031	1
DIRS-36_XT	DIRS	LTR	0.00753632	0.00753294	6.77361	0.988144	1
DIRS-47_XT	DIRS	LTR	0.488061	0.491584	4.60942	0.655964	1
DIRS-4_DR	Ngaro	LTR	-0.804521	-0.821884	4.94896	0.410184	1
DIRS-4N2_DR	Ngaro	LTR	1.17245	1.18858	4.05204	0.240324	1
DIRS-4_SP	DIRS	LTR	0.2013	0.201587	6.88911	0.737107	1
DIRS-52_XT	DIRS	LTR	0.435898	0.439706	7.00266	0.539371	1
DIRS-5_DR	Ngaro	LTR	-0.996381	-1.00618	4.36631	0.20808	1
DIRS-8A_XT	DIRS	LTR	-0.113669	-0.114333	6.32003	0.879461	1
DIRS-8B_DR	Ngaro	LTR	-0.0443931	-0.0444267	8.43816	0.933591	1
DIRS-8_DR	Ngaro	LTR	0.082545	0.0826231	7.57302	0.850633	1
DIRS-9_NV	DIRS	LTR	0.436469	0.453639	4.56578	0.764809	1
DIRS-N4_DR	Ngaro	LTR	-0.378661	-0.381184	7.51973	0.52635	1
DNA-1-8_DR	DNA	DNA	0.714894	0.71845	4.8862	0.47891	1
DNA-1_CQ	DNA	DNA	0.0995364	0.100206	4.81239	0.906777	1
DNA-1_Gav	DNA	DNA	0.228508	0.229244	8.24736	0.604675	1
DNA2-10_CGi	DNA	DNA	-0.425645	-0.431271	4.49147	0.649006	1
DNA-2-10_DR	TcMar	DNA	0.643583	0.651486	3.68478	0.660161	1
DNA2-10_DR	DNA	DNA	-0.111819	-0.112483	5.9258	0.855811	1
DNA-2-12_DR	CMC-EnSpm	DNA	-0.506675	-0.511739	6.15335	0.409158	1
DNA-2-13_DR	DNA	DNA	0.0233397	0.0245508	3.9273	0.983866	1
DNA-2-14_DR	CMC-EnSpm	DNA	-0.00291809	-0.00310708	6.6281	0.996534	1
DNA-2-15_DR	DNA	DNA	-0.111211	-0.111666	6.61205	0.836952	1
DNA2-16_DR	DNA	DNA	-0.0567087	-0.0567405	8.86668	0.877588	1
DNA-2-18_DR	CMC-EnSpm	DNA	0.323844	0.325441	5.29077	0.64231	1
DNA-2-1_DR	CMC-EnSpm	DNA	0.848623	0.856605	4.29964	0.478979	1
DNA2-1_DR	CMC-EnSpm	DNA	0.0623041	0.0627028	4.06049	0.964425	1
DNA-2-20_DR	CMC-EnSpm	DNA	0.540505	0.54219	5.84896	0.400341	1
DNA-2-24B_DR	DNA	DNA	0.196798	0.197025	7.05535	0.680014	1
DNA-2-27_DR	DNA	DNA	-1.08792	-1.09518	5.4635	0.231951	1
DNA-2-31_DR	TcMar-ISRm11	DNA	0.346602	0.348639	4.89351	0.716781	1
DNA-2-34_DR	TcMar-ISRm11	DNA	0.972677	0.987858	4.03308	0.438324	1
DNA2-3_DR	hAT	DNA	-0.864854	-0.866364	6.32219	0.213412	1
DNA-2-3_HM	CMC-EnSpm	DNA	-0.305872	-0.314699	8.74286	0.799379	1
DNA2-5_DR	hAT-Ac	DNA	-0.0759873	-0.0760121	9.14785	0.837509	1
DNA2-7_CGi	DNA	DNA	-0.186757	-0.189378	4.18149	0.879909	1
DNA-2-9_DR	CMC-EnSpm	DNA	-0.989826	-1.00693	3.39725	0.474645	1
DNA3-10_CGi	DNA	DNA	-0.207574	-0.212227	6.66063	0.764872	1
DNA3-13B_CGi	PIF-Harbinger	DNA	1.31776	1.35889	3.90748	0.465692	1
DNA3-1_CGi	CMC-EnSpm	DNA	0.401582	0.403395	7.0681	0.510891	1
DNA3-4_CGi	DNA	DNA	0	0	3.76035	1	1
DNA4-17B_CGi	DNA	DNA	-0.260556	-0.263784	3.78684	0.839176	1
DNA4-24_CGi	DNA	DNA	-0.0999417	-0.10017	8.0485	0.86324	1
DNA-4-3_DR	DNA	DNA	0.522589	0.523275	6.84271	0.281453	1
DNA-5-2B_DR	hAT-Tip100	DNA	-0.530867	-0.536297	4.21956	0.650701	1
DNA-5-4_DR	DNA	DNA	0.529979	0.532994	5.30323	0.462379	1
DNA5_Lch	DNA	DNA	-0.423484	-0.426935	5.44718	0.619334	1
DNA-6-N2_DR	DNA	DNA	-0.328432	-0.329637	5.39681	0.670281	1
DNA-6-N5_DR	DNA	DNA	-0.448669	-0.45527	6.46909	0.66104	1
DNA7_Lch	DNA	DNA	-0.926714	-0.933374	4.83811	0.407241	1
DNA7-N1_DR	DNA	DNA	0.178936	0.179079	7.96857	0.662245	1
DNA8-14_DR	DNA	DNA	0.357993	0.358376	7.95437	0.537615	1
DNA8-17_DR	DNA	DNA	0.23443	0.234821	6.53282	0.661844	1
DNA-8-18_DR	hAT	DNA	-0.245109	-0.245268	7.96313	0.602631	1
DNA8-21_DR	Merlin	DNA	-0.162967	-0.163092	8.72899	0.668951	1
DNA-8-25_DR	hAT-Ac	DNA	0.0264017	0.0264725	6.16565	0.962452	1
DNA8-25_DR	DNA	DNA	-0.498258	-0.498788	7.69868	0.228531	1
DNA8-26_DR	DNA	DNA	0.0132607	0.0132663	9.63048	0.971025	1
DNA8-2_CQ	DNA	DNA	0.427996	0.433489	5.66	0.669595	1
DNA-8-32_DR	hAT	DNA	0.712151	0.716569	5.06721	0.344677	1
DNA-8-34_DR	hAT-Tip100	DNA	-0.249444	-0.251318	5.47474	0.735815	1
DNA-8-3_HM	DNA	DNA	-0.675912	-0.678181	7.86803	0.298416	1
DNA8-4A_DR	hAT-Charlie	DNA	-0.276617	-0.276831	7.74992	0.597041	1
DNA8-4_DR	hAT-Charlie	DNA	-0.158069	-0.158571	5.6184	0.795752	1
DNA-8-5_DR	hAT	DNA	0.307456	0.30759	9.2785	0.371027	1
DNA8-7_CQ	DNA	DNA	-0.43043	-0.434013	4.52798	0.648829	1
DNA-8-9_DR	hAT-Ac	DNA	-0.181391	-0.181993	5.78328	0.795865	1
DNA9-2_AAe	MULE-MuDR	DNA	0.219172	0.219983	5.75469	0.749147	1
DNA9-3_DR	DNA	DNA	0.0705196	0.0705723	8.63295	0.852724	1
DNA9-5_DR	DNA	DNA	-0.0544238	-0.0544645	8.47446	0.900836	1
DNA-AT-2_DR	DNA	DNA	-0.342026	-0.346491	3.75629	0.824429	1
DNA-N4_DR	DNA	DNA	0.383307	0.383717	8.13634	0.385318	1
DNA-TA-12_CQ	DNA	DNA	0.0433806	0.0434481	7.26064	0.939847	1
DNA-TA-4_DR	TcMar	DNA	0.248557	0.251318	4.37744	0.833309	1
DNA-TA-5_DR	TcMar-Tigger	DNA	-0.209417	-0.209612	7.34658	0.669131	1
DNA-TTAA0-1_DR	DNA	DNA	0.703885	0.709331	4.81269	0.362475	1
DNA-X-13_DR	DNA	DNA	-0.883229	-0.945885	5.4499	0.437697	1
DNA-X-14_DR	DNA	DNA	-0.576276	-0.598072	4.47662	0.554752	1
DNAX-23_DR	DNA	DNA	-0.232872	-0.23433	5.04768	0.777301	1
DNAX-24B_DR	DNA	DNA	-0.54978	-0.550969	6.39409	0.3679	1
DNAX-24_DR	PIF-Harbinger	DNA	-1.09961	-1.11666	3.87277	0.305603	1
DNAX-25_DR	Zisupton	DNA	0.463218	0.467716	4.3175	0.651786	1
DNA-X-6_DR	DNA	DNA	-1.51686	-1.54005	3.85824	0.229573	1
Dong2_FR	Dong-R4	LINE	0.326336	0.326398	10.8814	0.37066	1
Dong_FR	Dong-R4	LINE	-0.244046	-0.244099	12.1207	0.78598	1
EbuSINE2	tRNA-Deu	SINE	-1.08625	-1.11766	4.44356	0.340481	1
EnSpm-10_HM	CMC-EnSpm	DNA	0.60595	0.609361	5.53695	0.363713	1
EnSpm-11_DR	CMC-EnSpm	DNA	0.241975	0.242314	6.69044	0.660124	1
EnSpm-11_HM	CMC-EnSpm	DNA	-1.22819	-1.23509	4.71664	0.284645	1
EnSpm-12_DR	CMC-EnSpm	DNA	-0.0540713	-0.0543082	4.98635	0.950704	1
EnSpm-13_DR	CMC-EnSpm	DNA	-0.496079	-0.497242	7.70797	0.470799	1
EnSpm-14_DR	CMC-EnSpm	DNA	-0.0790376	-0.0790752	7.96345	0.902464	1
EnSpm-14N1_DR	CMC-EnSpm	DNA	-0.468259	-0.46986	6.24972	0.494046	1
EnSpm-15_DR	CMC-EnSpm	DNA	-0.441885	-0.441979	9.16945	0.333264	1
EnSpm-17_DR	CMC-EnSpm	DNA	-0.265247	-0.266219	5.42057	0.742473	1
EnSpm-17_HM	CMC-EnSpm	DNA	-0.165828	-0.165987	8.06473	0.6877	1
EnSpm-18_DR	CMC-EnSpm	DNA	-0.836966	-0.84008	6.71471	0.218073	1
EnSpm-19_DR	CMC-EnSpm	DNA	0.127522	0.128116	5.00263	0.894177	1
EnSpm-1_BF	CMC-EnSpm	DNA	0.592561	0.602687	6.80906	0.536467	1
EnSpm-1_HM	CMC-EnSpm	DNA	-0.110613	-0.110844	3.94016	0.934506	1
EnSpm-1_PM	CMC-EnSpm	DNA	0.192201	0.192268	8.71728	0.606848	1
EnSpm-21_HMa	CMC-EnSpm	DNA	0.0324539	0.0327285	4.57163	0.975134	1
EnSpm-2_DR	CMC-EnSpm	DNA	-0.429647	-0.429757	8.90685	0.250608	1
EnSpm-2_HM	CMC-EnSpm	DNA	-0.691636	-0.697761	4.84551	0.461115	1
EnSpm-3_DR	CMC-EnSpm	DNA	-0.288523	-0.28913	5.85718	0.669217	1
EnSpm-3_NVe	CMC-EnSpm	DNA	-0.266294	-0.267171	6.00233	0.662433	1
EnSpm-4_ADi	CMC-EnSpm	DNA	-1.83719	-1.44269e+08	6.22924	0.231533	1
EnSpm-4_DR	CMC-EnSpm	DNA	0.104345	0.1045	6.33239	0.850397	1
EnSpm-4_HM	CMC-EnSpm	DNA	0.320291	0.320836	7.81135	0.486341	1
EnSpm-4N2_DR	CMC-EnSpm	DNA	-0.100363	-0.101172	4.61424	0.918827	1
EnSpm-5_HM	CMC-EnSpm	DNA	-0.000504321	-0.00050431	11.5792	0.998803	1
ENSPM-6_DR	CMC-EnSpm	DNA	0.017165	0.0171662	11.1256	0.960609	1
EnSpm-6N1_DR	CMC-EnSpm	DNA	-0.0461599	-0.0463204	6.5779	0.936262	1
EnSpm-7_DR	CMC-EnSpm	DNA	-0.172772	-0.172849	9.1246	0.659424	1
EnSpm-7_HM	CMC-EnSpm	DNA	-0.654298	-0.670888	4.12262	0.549609	1
EnSpm-8_DR	CMC-EnSpm	DNA	0.28743	0.288356	5.79507	0.701299	1
EnSpm-9_DR	CMC-EnSpm	DNA	0.231851	0.231886	11.0116	0.526491	1
EnSpm-N10_DR	CMC-EnSpm	DNA	0.0191841	0.019193	9.30346	0.958083	1
EnSpm-N11_DR	CMC-EnSpm	DNA	-0.162455	-0.163049	5.72874	0.789017	1
EnSpm-N13_DR	CMC-EnSpm	DNA	0.0238422	0.0238582	8.66222	0.952227	1
EnSpm-N14_DR	CMC-EnSpm	DNA	-0.124893	-0.125087	7.65956	0.770791	1
EnSpm-N17_DR	TcMar	DNA	0.149443	0.149621	6.69269	0.759319	1
EnSpm-N1_CGi	CMC-EnSpm	DNA	1.317	1.33805	4.04136	0.285523	1
EnSpm-N2_DR	CMC-EnSpm	DNA	-0.224897	-0.228432	4.44505	0.848238	1
ERV1-10_AMi-I	ERV1	LTR	-0.715396	-0.716182	6.7626	0.262345	1
ERV1-1-EC_I-int	ERV1	LTR	-0.0114303	-0.0114561	5.54116	0.987002	1
ERV1-1_Gav-I	ERV1	LTR	1.09446	1.11053	4.3314	0.444654	1
ERV1-1-I_Lch	LTR	LTR	-0.394153	-0.397992	6.7925	0.669014	1
ERV1-1_LCh-I	LTR	LTR	-0.268113	-0.268705	6.89329	0.719202	1
ERV1-1_OPr-I	ERV1	LTR	0.409339	0.409608	9.52793	0.265468	1
ERV1-1_SSc-I	ERV1	LTR	-0.422048	-0.42281	7.63422	0.382502	1
ERV1-2_Gav-I	ERV1	LTR	-0.314127	-0.315585	6.80247	0.605157	1
ERV1-2-LTR_BT	ERV1	LTR	0.227114	0.227249	7.52833	0.64129	1
ERV1-3_AMi-I	ERV1	LTR	-0.0292971	-0.0293096	7.83591	0.95336	1
ERV1-3_Crp-I	ERV1	LTR	-1.07383	-1.08007	4.71925	0.410732	1
ERV1-3-I_DR	ERV1	LTR	-0.585045	-0.587167	6.06735	0.503237	1
ERV1-3N-EC_I-int	ERV1	LTR	-0.800268	-0.801334	6.57843	0.2458	1
ERV1-4B_Gav-LTR	ERV1	LTR	0.30121	0.301764	6.05324	0.696	1
ERV1-5-EC_I-int	ERVL	LTR	1.13137	1.14593	4.37229	0.446381	1
ERV1-5N-EC_I-int	ERV1	LTR	1.67746	1.44269e+08	4.21275	0.275955	1
ERV1-7_AMi-I	ERV1	LTR	-0.365836	-0.366355	6.52082	0.666938	1
ERV1-7_DR-I	ERV1	LTR	0.00988537	0.0104213	4.71307	0.990878	1
ERV17_MD_I-int	ERVK	LTR	1.20619	1.21295	4.78999	0.263233	1
ERV1-9N-I_ML	ERV1	LTR	-0.417337	-0.417392	9.82138	0.443658	1
ERV1_MD_I-int	ERVK	LTR	1.04785	1.07816	4.01247	0.40067	1
ERV1-N3-I_DR	ERV	LTR	0.0271069	0.0271383	7.74613	0.957206	1
ERV1-N7-I_DR	ERV1	LTR	-0.0527641	-0.0530852	5.10577	0.94835	1
ERV1X1-I_ML	ERV1	LTR	0.660431	0.672586	4.33929	0.653017	1
ERV2-1_ET-I	ERVK	LTR	-0.525741	-0.530139	5.28347	0.563609	1
ERV2-2_CHo-I	ERVK	LTR	0	0	3.62027	1	1
ERV2-2_Tbel_I-int	ERVK	LTR	0.862516	0.865651	5.30007	0.335911	1
ERV2-3_FC-I	ERVK	LTR	0.0883212	0.0890584	5.47956	0.925704	1
ERV23_MD_I-int	ERVK	LTR	-0.434319	-0.434541	8.50771	0.305679	1
ERV2-3_PVa-I	ERVK	LTR	-0.381567	-0.384539	4.2384	0.729933	1
ERV24_MD_I-int	ERV1	LTR	-0.43689	-0.442947	4.04758	0.691823	1
ERV24_Prim-int	ERV1	LTR	-1.05735	-1.06688	4.24832	0.39146	1
ERV25a_MD_LTR	ERV1	LTR	0.497558	0.505792	4.33729	0.755336	1
ERV2-5_Pca-I	ERVK	LTR	0.334169	0.33449	7.24878	0.529121	1
ERV2B-CPo_I-int	ERVK	LTR	0.25712	0.257419	7.21147	0.588996	1
ERV-2B_Crp-LTR	ERV1	LTR	0.16092	0.160967	9.35031	0.637409	1
ERV-2_CPB-I	ERV1	LTR	-0.425827	-0.426124	7.38386	0.464137	1
ERV3-1-EC_I-int	ERVL	LTR	-0.143044	-0.143265	7.61756	0.833508	1
ERV3-1-I_XT	ERVL	LTR	0.54296	0.548131	6.71571	0.48684	1
ERV37_MD_I-int	ERV1	LTR	-1.25912	-1.28677	3.942	0.354086	1
ERV-3_AMi-LTR	ERV1	LTR	1.03715	1.0465	4.18623	0.233147	1
ERV-3_Crp-I	ERV1	LTR	-0.344949	-0.346287	5.96319	0.63408	1
ERV40_MD_I-int	ERV1	LTR	-0.42775	-0.427863	8.8972	0.341588	1
ERV4_DR-I	ERV1	LTR	-0.351781	-0.351817	10.0935	0.445722	1
ERV54-EC_I-int	ERV1	LTR	-0.637016	-0.637497	7.37787	0.299975	1
ERV6B-MD_I-int	ERV1	LTR	-0.159146	-0.159244	8.65008	0.701519	1
ERV6_MD_I-int	ERV1	LTR	-0.247739	-0.248706	5.95051	0.690356	1
ERV-8_CPB-LTR	ERV1	LTR	1.7392	1.77299	3.52666	0.308307	1
ERV8N_MD_I-int	ERV1	LTR	0.0521713	0.0523835	6.8697	0.937361	1
Expander	RTE	LINE	0.0353002	0.0353131	9.56904	0.931299	1
EXPANDER1_DR	RTE	LINE	0.32233	0.322421	9.31717	0.37475	1
FUGUREP2	Unknown	Unknown	-0.123751	-0.123775	10.1427	0.71532	1
Furousha1	hAT-Ac	DNA	-0.549575	-0.552115	6.46702	0.483281	1
Furousha2	hAT-Ac	DNA	0.482958	0.483684	6.38834	0.415655	1
Galileo_DW	P	DNA	-0.377194	-0.381367	5.3974	0.707683	1
Ginger1-1_AC	Ginger	DNA	0.169677	0.169784	9.39481	0.630177	1
Ginger1-1_DR	Ginger	DNA	0.293182	0.296273	4.63864	0.753149	1
Ginger1-2_DR	Ginger	DNA	-0.291651	-0.291818	9.04291	0.457947	1
Ginger1-2_HM	Ginger	DNA	0.719969	0.721856	5.95414	0.346657	1
Ginger1-5_HM	Ginger	DNA	0.223369	0.223446	9.17767	0.534939	1
Ginger1-7_HM	Ginger	DNA	-0.709287	-0.727541	4.13085	0.452446	1
Ginger2-1_LS	Ginger	DNA	0.0510766	0.051108	7.86459	0.932822	1
Gyps2_I-int	Gypsy	LTR	-0.703996	-0.707149	7.37504	0.21588	1
GYPSM1_I-int	Gypsy	LTR	0.686326	0.697624	3.7326	0.681248	1
GypsOL-int	Gypsy	LTR	-0.540436	-0.545057	5.31621	0.549275	1
Gypsy-10_CPB-I	Gypsy	LTR	-0.0923632	-0.0924775	7.95024	0.83125	1
Gypsy-10_DWil-I	Gypsy	LTR	-0.507225	-0.508548	6.48357	0.380653	1
Gypsy10-LTR_DR	Gypsy	LTR	-1.42936	-1.45276	3.64271	0.259807	1
Gypsy-10_OD-I	Gypsy	LTR	-0.272945	-0.275683	5.86819	0.69578	1
Gypsy-110_DR-I	Gypsy	LTR	0.914366	0.92074	5.05962	0.334505	1
Gypsy119-I_DR	Gypsy	LTR	-0.569072	-0.578589	4.72721	0.605666	1
Gypsy-11_GA-I	Gypsy	LTR	0.1421	0.144067	4.19038	0.928753	1
Gypsy11-I_DR	Gypsy	LTR	0.535719	0.53689	7.00075	0.31114	1
Gypsy11-NVi_I-int	Gypsy	LTR	0.0562344	0.056366	5.97082	0.926222	1
Gypsy120-LTR_DR	Gypsy	LTR	0.286737	0.287478	6.56291	0.55652	1
Gypsy122-LTR_DR	Gypsy	LTR	-0.93151	-0.938374	5.78348	0.268004	1
Gypsy124-I_DR	Gypsy	LTR	-0.709483	-0.712727	5.47076	0.381999	1
Gypsy127-I_DR	Gypsy	LTR	-0.384926	-0.38636	6.3585	0.72682	1
Gypsy-12_CPB-I	Gypsy	LTR	-0.745932	-0.756322	4.50363	0.570858	1
Gypsy-12_DWil-I	Gypsy	LTR	-0.0466922	-0.0467838	6.13556	0.945501	1
Gypsy132-I_DR	Gypsy	LTR	0.352691	0.354451	5.01919	0.76456	1
Gypsy-13_GA-I	Gypsy	LTR	-1.23661	-1.28377	3.94455	0.303365	1
Gypsy13-I_DR	Gypsy	LTR	0.135953	0.136315	5.9514	0.867156	1
Gypsy141-I_DR	Gypsy	LTR	0.153218	0.154013	5.99506	0.807378	1
Gypsy144-I_DR	Gypsy	LTR	0.312669	0.314578	4.61279	0.736896	1
Gypsy147-I_DR	Gypsy	LTR	-0.944822	-0.947897	5.45736	0.507677	1
Gypsy148-LTRb_DR	Gypsy	LTR	1.69387	2.04989	4.25427	0.269397	1
Gypsy-14_CPB-I	Gypsy	LTR	-0.362207	-0.364772	4.82875	0.73994	1
Gypsy-14-I_DR	Gypsy	LTR	-0.316693	-0.317861	5.2297	0.714089	1
Gypsy-14-I_HM	Gypsy	LTR	0.169292	0.169421	7.26329	0.761706	1
Gypsy-14_LCh-I	LTR	LTR	0.153096	0.155715	3.17246	0.911007	1
Gypsy14-NVi_I-int	Gypsy	LTR	0.20175	0.202334	6.04907	0.754149	1
Gypsy-14_PBa-I	LTR	LTR	0.339985	0.341277	5.11642	0.687339	1
Gypsy-153_AA-I	Gypsy	LTR	0.149771	0.159462	4.94582	0.890044	1
Gypsy158-I_DR	Gypsy	LTR	-1.06986	-1.08766	5.02764	0.271423	1
Gypsy-15_DEl-I	Gypsy	LTR	-0.153613	-0.156188	4.15391	0.92977	1
Gypsy-15_GA-I	Gypsy	LTR	-0.9649	-0.973261	4.35036	0.315238	1
Gypsy-15-I_DR	Gypsy	LTR	-0.917743	-0.920763	5.42276	0.388457	1
Gypsy-162_AA-I	Gypsy	LTR	0.856649	0.870999	3.45665	0.466541	1
Gypsy-165-I_DR	Gypsy	LTR	0.905	0.920722	3.87771	0.529962	1
Gypsy-166_AA-LTR	Gypsy	LTR	-0.437885	-0.438732	7.21313	0.522144	1
Gypsy-16_Adi-I	Gypsy	LTR	-0.524214	-0.535916	4.55254	0.630179	1
Gypsy-16_DTa-I	Gypsy	LTR	-0.977428	-1.00077	3.8792	0.498471	1
Gypsy16-I_AG	Gypsy	LTR	-0.67049	-0.674183	4.85056	0.355031	1
Gypsy-16-I_DR	Gypsy	LTR	-0.607106	-0.610731	4.75399	0.591106	1
Gypsy-171_DR-I	Gypsy	LTR	-0.380895	-0.381829	5.86531	0.601956	1
Gypsy-176_DR-I	Gypsy	LTR	-0.296059	-0.300655	3.53706	0.867829	1
Gypsy-179_DR-I	Gypsy	LTR	1.01916	1.02977	4.12655	0.398836	1
Gypsy-17-I_DR	Gypsy	LTR	-0.129669	-0.129861	6.45742	0.875553	1
Gypsy-17-I_XT	Gypsy	LTR	0.506135	0.507209	5.93171	0.408092	1
Gypsy-182_DR-I	Gypsy	LTR	0.821689	0.830102	4.07052	0.515022	1
Gypsy-188_DR-I	Gypsy	LTR	-0.896329	-0.912388	3.75361	0.575032	1
Gypsy-18_Ano-I	Gypsy	LTR	1.05923	1.06878	4.05604	0.350617	1
Gypsy-18_Crp-I	Gypsy	LTR	1.50582	1.53807	3.37301	0.321229	1
Gypsy-18-I_DR	Gypsy	LTR	-0.590307	-0.599647	3.87958	0.6873	1
Gypsy18-I_Dya	Gypsy	LTR	-0.272057	-0.272249	8.19943	0.572283	1
Gypsy-18_LCh-I	LTR	LTR	-0.831868	-0.846462	3.68702	0.546044	1
Gypsy-19_Ano-I	Gypsy	LTR	-0.030894	-0.0311679	4.82174	0.980705	1
Gypsy-19_CGi-I	Gypsy	LTR	-0.0250788	-0.025112	8.42556	0.951387	1
Gypsy-19-I_DR	Gypsy	LTR	-0.262991	-0.265354	4.27494	0.823286	1
Gypsy-19_LCh-I	LTR	LTR	-0.618005	-0.62686	3.64159	0.669479	1
Gypsy-1_AC-I	Gypsy	LTR	0.403021	0.404061	6.86083	0.438547	1
Gypsy-1_FR-I	Gypsy	LTR	0.10067	0.100998	5.5253	0.902771	1
Gypsy1-NVi_I-int	Gypsy	LTR	-0.72873	-0.734556	5.39476	0.407151	1
Gypsy-1_PBa-I	LTR	LTR	0.846955	0.861923	4.24964	0.391147	1
Gypsy-1_XT-I	Gypsy	LTR	-0.760879	-0.775518	3.85138	0.646057	1
Gypsy-206_DR-I	Gypsy	LTR	-0.494768	-0.495646	9.19609	0.248822	1
Gypsy-207_DR-I	Gypsy	LTR	-0.0997421	-0.100285	5.64699	0.873401	1
Gypsy-20-I_NV	Gypsy	LTR	1.00825	1.03189	4.07226	0.51783	1
Gypsy-213_AA-I	Gypsy	LTR	-0.141087	-0.141469	6.53463	0.831071	1
Gypsy-213_DR-LTR	Gypsy	LTR	-1.05891	-1.07474	4.10389	0.332766	1
Gypsy-21_Gav-I	Gypsy	LTR	0.35671	0.3598	5.47872	0.631937	1
Gypsy-21-I_DR	Gypsy	LTR	-0.141911	-0.142662	5.50175	0.877592	1
Gypsy-21_PBa-LTR	LTR	LTR	0.747377	0.755042	4.67547	0.377202	1
Gypsy-21_SI-I	Gypsy	LTR	0.296011	0.297792	4.72056	0.745775	1
Gypsy-220_DR-I	Gypsy	LTR	-0.565093	-0.569764	4.7913	0.524893	1
Gypsy-226_DR-I	Gypsy	LTR	0.372772	0.378545	5.40786	0.71426	1
Gypsy-228_AA-I	Gypsy	LTR	0	0	4.9498	1	1
Gypsy-22_DWil-I	Gypsy	LTR	0.482237	0.485364	4.86281	0.606546	1
Gypsy-22_DY-I	Gypsy	LTR	0.930965	0.945898	4.37378	0.429153	1
Gypsy-22_GA-I	Gypsy	LTR	-0.662385	-0.663108	6.99511	0.263886	1
Gypsy-22_GA-LTR	Gypsy	LTR	-0.545522	-0.546822	5.86731	0.446469	1
Gypsy-230_AA-I	Gypsy	LTR	-1.81929	-1.44269e+08	6.49026	0.233455	1
Gypsy-233_DR-I	Gypsy	LTR	0.0258271	0.025865	5.61991	0.967042	1
Gypsy-23_DEl-I	Gypsy	LTR	0.678105	0.678778	7.79481	0.313366	1
Gypsy-23_GA-I	Gypsy	LTR	-0.187966	-0.18974	4.06744	0.880258	1
Gypsy-24_Adi-I	Gypsy	LTR	0.0588612	0.0593177	4.65866	0.949943	1
Gypsy24-I_Dpse	Gypsy	LTR	-0.139143	-0.140266	6.61251	0.842437	1
Gypsy-25_CGi-I	Gypsy	LTR	-0.245296	-0.247838	6.35292	0.760719	1
Gypsy25-I_AG	Gypsy	LTR	-0.0216579	-0.0216984	6.72565	0.976963	1
Gypsy-25_IS-I	Gypsy	LTR	0.2263	0.226611	9.03079	0.634746	1
Gypsy-25_LH-LTR	LTR	LTR	1.02636	1.03432	4.5443	0.268604	1
Gypsy-25_PM-I	Gypsy	LTR	-1.46315	-1.47044	5.0594	0.227407	1
Gypsy-26_GA-I	Gypsy	LTR	-0.485401	-0.486577	5.70874	0.538216	1
Gypsy-27_DP-I	Gypsy	LTR	0.555545	0.563844	3.88205	0.696208	1
Gypsy-27_GA-I	Gypsy	LTR	0.186762	0.188576	5.65354	0.835187	1
Gypsy27-I_AG	Gypsy	LTR	-0.771958	-0.779247	5.65351	0.338227	1
Gypsy-28_Adi-I	Gypsy	LTR	1.79541	1.83754	3.53128	0.213886	1
Gypsy-29_GA-I	Gypsy	LTR	0.520371	0.522781	5.06842	0.65926	1
Gypsy29-I_AG	Gypsy	LTR	0.457456	0.460604	4.64153	0.682687	1
Gypsy-29-I_DR	Gypsy	LTR	0.25102	0.252947	5.75132	0.738225	1
GYPSY2-I_CB	Gypsy	LTR	0.303452	0.304151	5.75828	0.734935	1
Gypsy-2_LCh-I	LTR	LTR	1.26815	1.27829	5.25667	0.234899	1
Gypsy-2_TCa-I	Gypsy	LTR	-0.16387	-0.165144	6.08515	0.822838	1
Gypsy-30_AMi-LTR	Gypsy	LTR	-0.462689	-0.46732	3.93753	0.668952	1
Gypsy-30_CPB-I	Gypsy	LTR	0.599732	0.599845	9.58494	0.216972	1
Gypsy-30_GA-I	ERV1	LTR	-1.27225	-1.28781	5.97081	0.267996	1
Gypsy-30-I_DR	Gypsy	LTR	-0.385005	-0.386658	5.08159	0.743555	1
Gypsy-31-I_DR	Gypsy	LTR	-0.128846	-0.129631	5.41556	0.869924	1
Gypsy3-1-I_Lch	LTR	LTR	1.40241	1.43364	3.9822	0.266739	1
Gypsy-31-LTR_DR	Gypsy	LTR	0.173834	0.173871	10.313	0.667461	1
Gypsy-31_SI-I	LTR	LTR	-1.84493	-1.44269e+08	3.84234	0.248363	1
Gypsy32-I_AG	Gypsy	LTR	-1.0485	-1.06879	5.3554	0.339414	1
Gypsy-34_GA-I	Gypsy	LTR	-0.687776	-0.692486	4.81995	0.467106	1
Gypsy-34_GA-LTR	Gypsy	LTR	-0.434353	-0.435209	6.23447	0.56193	1
Gypsy35-I_DR	Gypsy	LTR	-0.821845	-0.841657	3.22303	0.661368	1
Gypsy-36-I_NV	Gypsy	LTR	1.99638	2.08567	3.7902	0.284748	1
Gypsy-37_AA-LTR	Gypsy	LTR	0.858577	0.861592	5.39209	0.372068	1
Gypsy-37_CQ-I	Gypsy	LTR	-0.889903	-0.912232	4.90122	0.410493	1
Gypsy37-I_AG	Gypsy	LTR	-0.287354	-0.287879	6.66588	0.56758	1
Gypsy37-I_DR	Gypsy	LTR	-0.981139	-1.00827	3.33579	0.623095	1
Gypsy-38_DWil-I	Gypsy	LTR	-0.514063	-0.5243	3.8853	0.720173	1
Gypsy38-I_DR	Gypsy	LTR	-1.14399	-1.29676	4.43041	0.402673	1
Gypsy-39_GA-I	Gypsy	LTR	-0.0540037	-0.0542669	7.31057	0.93736	1
Gypsy-3_PBa-I	LTR	LTR	-0.0524917	-0.0525907	5.99027	0.940036	1
Gypsy-42_GA-I	Gypsy	LTR	0.30646	0.306801	7.13421	0.540925	1
Gypsy-43_DWil-I	Gypsy	LTR	0.216311	0.217015	5.84192	0.747494	1
Gypsy44-LTR_DR	Gypsy	LTR	-0.75746	-0.762202	4.93977	0.386448	1
Gypsy47-I_DR	Gypsy	LTR	0.467015	0.467091	9.64136	0.275147	1
Gypsy-49_DEl-I	Gypsy	LTR	-0.463387	-0.464369	7.70914	0.440411	1
Gypsy-49_GA-I	Gypsy	LTR	0.94164	0.96369	3.588	0.568996	1
Gypsy-4_DSim-I	Gypsy	LTR	-0.845966	-0.863861	4.92162	0.397466	1
Gypsy4-I_DR	Gypsy	LTR	-0.184457	-0.184926	5.60569	0.836732	1
Gypsy-50_GA-LTR	Gypsy	LTR	0.358889	0.359197	8.80863	0.429074	1
Gypsy-51_GA-LTR	Gypsy	LTR	-0.365269	-0.365995	7.20876	0.473848	1
Gypsy-52_GA-I	Gypsy	LTR	-0.490559	-0.495923	4.44133	0.582851	1
Gypsy-54_DWil-I	Gypsy	LTR	-1.68284	-1.7011	4.07422	0.227023	1
Gypsy-54_GA-I	Gypsy	LTR	-0.39309	-0.394023	7.0358	0.399682	1
Gypsy-55_CGi-I	Gypsy	LTR	0.806143	0.812927	5.1957	0.447119	1
Gypsy55-I_DR	Gypsy	LTR	-0.78683	-0.791027	5.02371	0.392678	1
Gypsy-55-I_NV	Gypsy	LTR	-0.61374	-0.616593	5.25058	0.41684	1
Gypsy-56_GA-I	Gypsy	LTR	-0.0816996	-0.0818921	5.71708	0.913884	1
Gypsy56-I_DR	Gypsy	LTR	0.66939	0.669634	9.13436	0.257476	1
Gypsy57-I_AG	Gypsy	LTR	-0.166292	-0.168467	3.86272	0.882651	1
Gypsy57-LTR_DR	Gypsy	LTR	-0.0274442	-0.0275992	4.74638	0.973415	1
Gypsy-5_AA-LTR	Gypsy	LTR	0.0703045	0.0706548	4.4905	0.931288	1
Gypsy-5_DGri-I	Gypsy	LTR	-0.912626	-0.918886	4.67479	0.26522	1
Gypsy-5_DKi-I	Gypsy	LTR	-0.434235	-0.459765	4.90608	0.713573	1
Gypsy5_I-int	Gypsy	LTR	0.738424	0.74142	6.15647	0.260626	1
Gypsy-61_CGi-I	Gypsy	LTR	-1.91336	-1.44269e+08	3.40532	0.266988	1
Gypsy61-I_AG	Gypsy	LTR	-0.0656013	-0.0656093	10.2093	0.851488	1
Gypsy61-I_DR	Gypsy	LTR	0.199233	0.202288	4.37479	0.85864	1
Gypsy-63_CGi-I	Gypsy	LTR	0.027223	0.0273523	4.13787	0.983161	1
Gypsy64-I_DR	Gypsy	LTR	-0.831816	-0.836347	5.91456	0.315044	1
Gypsy-66_AA-I	Gypsy	LTR	-0.648788	-0.673772	5.04084	0.476001	1
Gypsy66-I_DR	Gypsy	LTR	1.84325	1.88792	3.70859	0.351874	1
Gypsy68-I_AG	Gypsy	LTR	0.262479	0.26258	9.31217	0.540154	1
Gypsy-6_AA-I	Gypsy	LTR	0.445038	0.449369	5.47196	0.673608	1
Gypsy-6_AEc-LTR	LTR	LTR	0.178326	0.178568	7.87469	0.689237	1
Gypsy-6_CFl-I	LTR	LTR	-0.201171	-0.203309	4.69592	0.847888	1
Gypsy-6_DEu-I	LTR	LTR	0.210726	0.211612	4.91003	0.784209	1
Gypsy-6_PBa-I	LTR	LTR	0.153968	0.154808	4.82557	0.876251	1
Gypsy70-I_DR	Gypsy	LTR	0.502019	0.511395	4.35374	0.625044	1
Gypsy-71_CQ-LTR	Gypsy	LTR	0.473193	0.474178	7.04566	0.324279	1
Gypsy71-I_DR	Gypsy	LTR	-1.28971	-1.29693	4.86063	0.313314	1
Gypsy-78-I_NV	Gypsy	LTR	0.138181	0.138509	5.91572	0.826103	1
Gypsy-7-I_XT	Gypsy	LTR	-0.41236	-0.415832	4.86086	0.736389	1
Gypsy-7_PPc-I	Gypsy	LTR	0.980944	0.987718	5.44946	0.31449	1
Gypsy-82_CQ-I	Gypsy	LTR	-0.765038	-0.782405	4.25217	0.539355	1
Gypsy82-LTR_Dr	Gypsy	LTR	-0.244838	-0.245156	7.26678	0.598723	1
Gypsy89-I_DR	Gypsy	LTR	0.748346	0.75354	4.65227	0.376107	1
Gypsy-8_AMi-I	Gypsy	LTR	-0.699847	-0.701471	6.32864	0.420146	1
Gypsy-8_DAn-I	Gypsy	LTR	-0.746802	-0.759893	3.90163	0.57196	1
Gypsy-8_DFi-I	LTR	LTR	-1.2008	-1.24624	5.02635	0.292319	1
Gypsy8-I_DR	Gypsy	LTR	-0.178747	-0.179936	4.31657	0.87723	1
Gypsy-90_CQ-I	Gypsy	LTR	-1.45586	-1.47896	4.13753	0.287983	1
Gypsy-9_CSa-I	Gypsy	LTR	0.331837	0.331962	8.23135	0.399702	1
Gypsy-9_DAn-I	Gypsy	LTR	-0.574243	-0.575744	6.69707	0.339002	1
Gypsy9-I_SP	Gypsy	LTR	-0.144098	-0.145393	6.60321	0.916838	1
Gypsy-9_OD-I	Gypsy	LTR	-0.202195	-0.203018	6.3344	0.76879	1
HAL1-2A_Cho	L1	LINE	-0.72585	-0.737199	3.47753	0.578958	1
HAL1-3A_ME	L1	LINE	0.431393	0.432364	6.50871	0.460375	1
HAL1-3_ME	L1	LINE	1.62968	1.66635	3.47486	0.331756	1
HAL1-5_Cho	L1	LINE	-0.662503	-0.666694	4.96664	0.377327	1
HAL1ME	L1	LINE	0.577129	0.581046	4.74037	0.476603	1
Harbinger-1_GA	PIF-Harbinger	DNA	-0.0545368	-0.054567	8.59235	0.888026	1
Harbinger-1_Gav	PIF-Harbinger	DNA	-0.385179	-0.388149	4.18219	0.688043	1
Harbinger-2_DR	PIF-Harbinger	DNA	-0.224467	-0.227234	3.93781	0.863229	1
Harbinger-2_GA	PIF-Harbinger	DNA	-0.513008	-0.520985	3.81564	0.746978	1
Harbinger-2_LCh	DNA	DNA	0.502466	0.506529	5.67915	0.451004	1
Harbinger-2N1_DR	PIF-Harbinger	DNA	-0.396821	-0.397671	6.33321	0.447351	1
Harbinger-2_XT	PIF-Harbinger	DNA	-0.390798	-0.392094	5.82646	0.54826	1
Harbinger-3_Crp	PIF-Harbinger	DNA	-0.386033	-0.392579	5.6569	0.713474	1
Harbinger-3_LCh	DNA	DNA	-0.495061	-0.495688	6.67854	0.378706	1
Harbinger-5_DR	PIF-Harbinger	DNA	0.120063	0.12131	3.93916	0.926586	1
Harbinger-6_DR	PIF-Harbinger	DNA	0.218229	0.221826	5.46601	0.831567	1
Harbinger-6_LCh	DNA	DNA	0.496437	0.550898	4.94461	0.742033	1
Harbinger-8_DR	PIF-Harbinger	DNA	-1.02659	-1.03956	5.24289	0.291446	1
Harbinger-N13B_DR	PIF-Harbinger	DNA	0.496918	0.504997	4.5112	0.610534	1
Harbinger-N16_DR	PIF-Harbinger	DNA	-0.0962266	-0.0964704	5.79926	0.905561	1
HarbingerN4_DR	PIF-Harbinger	DNA	0.525065	0.535822	4.20311	0.629559	1
hAT-10_XT	hAT-Ac	DNA	0.789849	0.796402	4.20973	0.45807	1
hAT-13_CPB	hAT-Tip100	DNA	0.936746	0.942191	4.97499	0.242165	1
hAT-13_DR	hAT-Tip100	DNA	-0.183517	-0.184919	4.97627	0.834652	1
hAT-14_DR	hAT-Ac	DNA	-1.37335	-1.3856	4.39623	0.26484	1
hAT-14_HM	hAT-Ac	DNA	0.0894511	0.0894838	9.35508	0.840041	1
hAT-15_DR	hAT-Ac	DNA	-1.33925	-1.35839	3.96162	0.273828	1
hAT-16_DR	hAT-Ac	DNA	-1.14868	-1.15555	4.98313	0.337705	1
hAT-16_LMi	hAT-Blackjack	DNA	-0.220581	-0.220799	7.32969	0.733984	1
hAT-17B_Croc	hAT-Ac	DNA	0.479447	0.484884	3.95043	0.674966	1
hAT-17_DR	hAT-Ac	DNA	0.781877	0.782605	7.60475	0.241696	1
hAT-17_LCh	DNA	DNA	0.0627813	0.0636376	4.17101	0.952573	1
hAT-1960_Ami	hAT-Charlie	DNA	-0.22009	-0.221777	5.42294	0.721711	1
hAT-19_LMi	hAT-Tip100	DNA	-0.803793	-0.815769	3.50827	0.647138	1
hAT-1B_PM	hAT-Charlie	DNA	0.576315	0.583085	4.19621	0.603333	1
HAT1_DR	hAT-Ac	DNA	-0.146254	-0.146501	7.34017	0.74612	1
hAT-1_LCh	DNA	DNA	-0.627866	-0.63325	4.56728	0.498231	1
hAT-1_LMi	hAT-Tip100	DNA	0.398247	0.398573	8.14502	0.456061	1
hAT-1_NV	hAT-Ac	DNA	-1.30915	-1.34028	3.20632	0.507812	1
hAT-208_Ami	hAT-Blackjack	DNA	-0.0871314	-0.0875959	5.07515	0.903858	1
hAT-20_DR	hAT-Ac	DNA	-0.301803	-0.303071	5.08988	0.723838	1
hAT-21_CPB	hAT-Charlie	DNA	0.0225472	0.0225518	9.67682	0.95088	1
hAT-22_DR	hAT-Charlie	DNA	0.873837	0.891406	4.23831	0.433458	1
hAT-23_DR	hAT-Tip100	DNA	-0.00519732	-0.00505943	6.65422	0.99312	1
hAT-24_LMi	hAT-Tip100	DNA	1.47603	1.51581	5.06826	0.271581	1
hAT-24N1_DR	hAT-Ac	DNA	-0.482995	-0.488001	4.13828	0.717105	1
hAT-26_DR	hAT-Ac	DNA	0.428469	0.429128	8.77541	0.337088	1
hAT-27_HM	hAT-Ac	DNA	0.452659	0.460289	3.66223	0.754184	1
hAT-27_LCh	DNA	DNA	0.468018	0.470151	5.9859	0.461098	1
hAT-28_LCh	DNA	DNA	-0.119876	-0.120081	8.16094	0.787277	1
hAT-29_DR	hAT-Ac	DNA	0.248304	0.250252	4.86695	0.847069	1
hAT-2_AC	hAT-Charlie	DNA	-0.56085	-0.575136	4.57332	0.641018	1
hAT-2_DR	hAT-Charlie	DNA	0.00573238	0.00574277	5.40015	0.994151	1
hAT-2_HM	hAT-Tag1	DNA	0.41667	0.41696	9.5622	0.255466	1
hAT-310_Ami	hAT-Charlie	DNA	0.665225	0.671821	4.79147	0.429395	1
hAT-40_HM	hAT-Tip100	DNA	-1.09853	-1.10851	5.3517	0.205141	1
hAT-42_Lch	DNA	DNA	0.256121	0.256329	8.34388	0.538442	1
hAT-44_Lch	DNA	DNA	-0.550078	-0.551938	6.06014	0.424711	1
hAT-47_HM	hAT-Tip100	DNA	1.41018	1.42272	4.28778	0.211406	1
hAT-4_AMi	hAT-Ac	DNA	1.00567	1.01756	3.86237	0.45782	1
hAT-4B_ACar	hAT-Ac	DNA	-0.0933257	-0.0937385	8.48609	0.831544	1
hAT-4B_AMi	hAT-Ac	DNA	-0.0813316	-0.0814847	7.52549	0.867197	1
hAT-4_DR	hAT-Ac	DNA	0.0532221	0.0536171	4.86876	0.955716	1
hAT-4_PBa	DNA	DNA	0.279085	0.27929	8.40848	0.470055	1
hAT-50_HM	hAT-Tip100	DNA	0.17072	0.170799	8.86456	0.660568	1
hAT-51_HM	hAT-Tip100	DNA	-1.00728	-1.01552	4.69766	0.2322	1
hAT-57_HM	hAT-hATm	DNA	0.218347	0.218587	6.9617	0.640016	1
hAT-5_LCh	DNA	DNA	0.829357	0.838391	4.31502	0.420958	1
hAT5-N2_DR	hAT-hAT5	DNA	1.03679	1.06661	5.43301	0.317469	1
hAT6-2_SP	hAT-Blackjack	DNA	0.0627592	0.0628345	8.58852	0.880269	1
hAT-6B_PM	hAT-Charlie	DNA	-0.386448	-0.386877	8.36737	0.317848	1
hAT-6_DR	hAT-Ac	DNA	-1.18926	-1.22559	4.78671	0.268488	1
hAT-6_GA	hAT-Charlie	DNA	-0.107721	-0.108113	6.54004	0.869286	1
hAT-6_SM	hAT-Charlie	DNA	-0.268191	-0.271427	3.96599	0.838116	1
hAT-6_XT	hAT-Charlie	DNA	0.100831	0.101063	6.45305	0.86997	1
hAT-7_AMi	hAT-Charlie	DNA	0.698684	0.702653	4.60954	0.474094	1
hAT-7_LCh	DNA	DNA	-1.03466	-1.05165	3.49805	0.475841	1
hAT-8_CPB	hAT-Charlie	DNA	0.299877	0.307086	4.30065	0.82976	1
hATm-19_HM	hAT-hATm	DNA	1.21694	1.24204	4.38464	0.340121	1
hATm-27_HM	hAT-hATm	DNA	1.88365	1.9643	3.88628	0.241006	1
hATm-3_AA	hAT-hATm	DNA	1.14155	1.15274	5.33485	0.219702	1
hAT-N106_DR	hAT	DNA	0.78109	0.783912	5.87203	0.257202	1
hAT-N107_DR	hAT-Ac	DNA	1.82288	1.8666	3.61147	0.247217	1
hAT-N10_CPB	hAT-Ac	DNA	0.466967	0.470622	6.65195	0.471728	1
HATN11B_DR	hAT	DNA	-0.0573587	-0.0574651	7.02139	0.905983	1
HATN11_DR	hAT	DNA	-0.0850344	-0.0852432	6.95785	0.878863	1
hAT-N120_DR	hAT-Charlie	DNA	0.670286	0.788342	4.29129	0.634053	1
hAT-N127_DR	hAT-Charlie	DNA	-0.396396	-0.396573	9.48047	0.369469	1
hAT-N131_DR	hAT-Ac	DNA	-0.359274	-0.359859	7.44044	0.437178	1
hAT-N137_DR	hAT-Tol2	DNA	-0.510535	-0.51332	4.96963	0.492139	1
hAT-N138_DR	hAT-Tol2	DNA	0.0335007	0.0335609	6.46477	0.951692	1
hAT-N13_AMi	hAT-Blackjack	DNA	0.245347	0.251322	4.24758	0.849581	1
hAT-N144_DR	hAT	DNA	0.360012	0.360037	11.2579	0.332047	1
hAT-N145_DR	hAT-Tol2	DNA	-0.86024	-0.863213	5.3306	0.244974	1
HATN15_DR	hAT	DNA	-0.815562	-0.826819	4.00478	0.643048	1
hAT-N16_Crp	hAT-Charlie	DNA	-0.701057	-0.704098	5.96674	0.276901	1
HATN17_DR	hAT	DNA	0.579748	0.584375	4.36025	0.580139	1
hAT-N1_CSa	hAT-Charlie	DNA	0.192871	0.194013	4.5685	0.838863	1
hAT-N1_FR	hAT-Charlie	DNA	0.83264	0.849506	3.50488	0.555045	1
hAT-N21B_CPB	hAT-Charlie	DNA	-0.827994	-0.831532	5.33056	0.300559	1
hAT-N21B_DR	hAT-Ac	DNA	0.0796777	0.0803697	4.24397	0.955131	1
hAT-N21_DR	hAT-Charlie	DNA	-0.232402	-0.233379	6.53526	0.668514	1
hAT-N25B_DR	hAT-Ac	DNA	0.26105	0.266557	3.23902	0.880978	1
hAT-N26_DR	hAT	DNA	0.276281	0.278035	6.14145	0.706618	1
hATN-28_DRe	hAT-Charlie	DNA	-0.323091	-0.331861	4.8519	0.781765	1
hAT-N29_DR	hAT	DNA	0.663707	0.672396	3.99231	0.49792	1
hAT-N2A_XT	hAT-Ac	DNA	0.323217	0.323546	7.16544	0.5783	1
hAT-N35B_DR	hAT-Ac	DNA	0.181671	0.181965	7.54839	0.675159	1
hAT-N35C_DR	hAT-Ac	DNA	-0.247486	-0.247768	6.80888	0.733001	1
hAT-N36C_DR	hAT	DNA	-0.0841052	-0.0857546	4.06634	0.947787	1
hAT-N36_DR	hAT	DNA	0.692494	0.701058	4.22555	0.560403	1
hAT-N45B_DR	hAT	DNA	-0.146351	-0.147423	4.76383	0.866635	1
hAT-N47B_DR	hAT	DNA	-0.612504	-0.613201	8.42722	0.455369	1
hAT-N49_DR	hAT-Ac	DNA	0.152392	0.152652	6.18032	0.803442	1
hAT-N4_LMi	hAT-Ac	DNA	0.503162	0.527365	4.09583	0.706619	1
hAT-N50B_DR	hAT-Ac	DNA	-0.0626238	-0.0626866	7.87138	0.884529	1
hAT-N52B_DR	hAT-Ac	DNA	1.19473	1.19999	5.8303	0.260604	1
hAT-N53B_DR	hAT-Ac	DNA	1.52448	1.54463	3.89306	0.339021	1
hAT-N53_DR	hAT-Ac	DNA	0.340764	0.340863	9.53663	0.358487	1
hAT-N67_DR	hAT	DNA	-0.845317	-0.859588	3.76545	0.498773	1
hAT-N6_ACar	hAT-Charlie	DNA	-0.160806	-0.161353	5.26073	0.862071	1
hAT-N70_DR	hAT	DNA	0.454905	0.456065	7.70892	0.343603	1
hAT-N71_DR	Zisupton	DNA	0.374482	0.377392	5.84937	0.618865	1
hAT-N74_DR	hAT-Ac	DNA	-0.93611	-0.939713	5.57217	0.28891	1
hAT-N7_BF	hAT-Ac	DNA	-1.12571	-1.14282	4.62839	0.323834	1
HATN7_DR	hAT	DNA	0.770305	0.786681	3.36063	0.672312	1
hAT-N81_DR	hAT-Charlie	DNA	-0.68616	-0.693814	5.40146	0.39767	1
hAT-N83_DR	hAT-Charlie	DNA	-0.390988	-0.404637	3.09219	0.844701	1
hAT-N91_DR	hAT-Ac	DNA	-0.55655	-0.558135	7.44512	0.281807	1
hAT-N93_DR	hAT-Ac	DNA	0.404607	0.406598	5.07274	0.670268	1
hAT-N97_DR	hAT-Ac	DNA	0.902817	0.910719	4.3873	0.415626	1
hATw-1_HM	hAT-hATw	DNA	-0.910146	-0.932805	3.0606	0.581744	1
HE1_DR1	tRNA-V	SINE	-0.566008	-0.568849	6.47226	0.440184	1
HE1_SINE	tRNA-V-CR1	SINE	-0.139921	-0.141076	5.0369	0.860552	1
HeliNoto	Helitron	RC	0.432972	0.439461	6.80669	0.628968	1
Helitron-1_CGi	Helitron	RC	-0.0231296	-0.0232564	5.84458	0.974781	1
Helitron-1_HM	Helitron	RC	-1.18274	-1.19055	4.72922	0.222185	1
Helitron-1_PBa	DNA	DNA	1.04895	1.06223	3.85745	0.494681	1
Helitron2_CE	Helitron	RC	0.038148	0.0383744	4.57698	0.971878	1
Helitron-3_DR	Helitron	RC	-1.39454	-1.4098	4.09853	0.486809	1
Helitron-3N3_PM	Helitron	RC	0.577293	0.578604	6.25448	0.349763	1
Helitron-4_DR	Helitron	RC	0.235573	0.235654	9.06152	0.565098	1
Helitron-6_CGi	Helitron	RC	0.293411	0.293544	9.25204	0.461882	1
Helitron-9_CGi	Helitron	RC	-0.207301	-0.210667	3.66328	0.902677	1
Helitron-N1B_CGi	Helitron	RC	-0.786916	-0.795747	6.13425	0.412149	1
Helitron-N1_PBa	DNA	DNA	-0.120898	-0.120993	7.77029	0.781752	1
Helitron-N26_CGi	Helitron	RC	0.0407887	0.0407962	10.6388	0.923628	1
Helitron-N2_DR	Helitron	RC	0.446707	0.447257	8.21892	0.329208	1
Helitron-N3_DR	Helitron	RC	-0.655208	-0.661174	4.50508	0.492983	1
Helitron-N3_DT	Helitron	RC	0.928934	0.935097	4.47954	0.333016	1
HERO-2_BF	R2-Hero	LINE	-0.358921	-0.370528	5.33501	0.726977	1
HERO-2_DR	R2-Hero	LINE	-0.780072	-0.789977	5.00065	0.451684	1
HERO-3_DR	R2-Hero	LINE	0.156037	0.15695	4.56199	0.86502	1
HEROFr	R2-Hero	LINE	-0.796213	-0.802297	4.47322	0.425082	1
HERVE_a-int	ERV1	LTR	0.535574	0.540184	4.093	0.575807	1
HERVE-int	ERV1	LTR	0.629081	0.630812	6.84736	0.227064	1
HERVIP10B3-int	ERV1	LTR	-0.0915321	-0.0915829	7.67256	0.873548	1
HERVK22-int	ERVK	LTR	-0.471058	-0.471721	8.90382	0.328061	1
HERVL18-int	ERVL	LTR	0.199201	0.204371	5.93502	0.852936	1
HERVL-int	ERVL	LTR	-0.0541689	-0.0542404	8.70182	0.897853	1
HERVP71A-int	ERV1	LTR	-0.137152	-0.138595	4.16107	0.88527	1
HeT-A3_DVi	Jockey	LINE	-0.917116	-0.925118	5.33519	0.371579	1
Hoana8	hAT-hobo	DNA	-0.663121	-0.679372	3.82119	0.698206	1
HOMER	hAT-hobo	DNA	-0.0541013	-0.0543253	6.01535	0.927113	1
I-1_DR	I	LINE	-1.14981	-1.16696	4.41784	0.265121	1
I-3_DBi	I	LINE	1.0364	1.05275	3.47432	0.374041	1
I-3_DR	I	LINE	0.402651	0.407986	5.95713	0.625469	1
I-5_CQ	I	LINE	0.855751	0.860657	5.09788	0.278769	1
I-7_DBp	I	LINE	0.668697	0.673592	4.3829	0.549408	1
IAPEY4_I-int	ERVK	LTR	0.295895	0.296168	6.92189	0.569154	1
IAPEy-int	ERVK	LTR	0.671172	0.685335	3.73018	0.718095	1
I_Ele8	I	LINE	0.836608	0.837697	6.55118	0.302165	1
IMPB_01	Satellite	Satellite	-0.0561706	-0.0562173	8.55591	0.879871	1
IS3EU-1_DR	IS3EU	DNA	-0.298682	-0.298819	9.32976	0.432035	1
IS3EU-2_DR	IS3EU	DNA	-0.529291	-0.530759	6.50431	0.555624	1
IS3EU-3_DR	IS3EU	DNA	0.656404	0.662328	3.98957	0.622696	1
IS3EU-4_DR	IS3EU	DNA	0.147239	0.147303	8.65845	0.712457	1
IS4EU-1_DR	PIF-ISL2EU	DNA	0.744936	0.755213	3.54459	0.550112	1
IS4EU-2_DR	PIF-ISL2EU	DNA	0.514311	0.516255	5.30209	0.504793	1
ISFUN1	Helitron	RC	0.798549	0.857705	3.86064	0.57817	1
ISL2EU-18_CGi	PIF-ISL2EU	DNA	-0.268302	-0.270487	5.17931	0.763858	1
ISL2EU-1_CS	PIF-ISL2EU	DNA	0.469911	0.471618	7.77918	0.40071	1
ISL2EU-1_DR	PIF-ISL2EU	DNA	0.632197	0.634286	6.64449	0.223556	1
ISL2EU-1_SK	PIF-ISL2EU	DNA	0.286317	0.286842	6.23095	0.669484	1
ISL2EU-3_CFl	DNA	DNA	0.18662	0.188018	4.57334	0.823476	1
ISL2EU-3N1_CFl	DNA	DNA	0.128996	0.129203	7.93346	0.765215	1
ISL2EU-5_CGi	PIF-ISL2EU	DNA	0.926864	0.930006	5.90238	0.345099	1
Jockey-11_DF	Jockey	LINE	-0.458251	-0.459092	6.86769	0.460804	1
Jockey-13_AAe	Jockey	LINE	-0.950829	-0.964884	4.63434	0.429956	1
Jockey-14_DBp	Jockey	LINE	1.30659	1.31075	5.69903	0.215697	1
Jockey-1_DSe	Jockey	LINE	1.64162	1.67517	3.35761	0.270507	1
Jockey-1_DT	Jockey	LINE	0	0	3.55543	1	1
Jockey-2_DGri	Jockey	LINE	0.665718	0.668476	7.30282	0.336677	1
Jockey-3_DF	Jockey	LINE	0	0	5.34252	1	1
Jockey-3_DPer	Jockey	LINE	0.508299	0.509169	7.04694	0.513272	1
Jockey-3_DRh	LTR	LTR	-1.75669	-1.79947	3.66887	0.278089	1
Jockey-6_DK	Jockey	LINE	-0.0620839	-0.0621735	9.24612	0.909951	1
Jockey_Ele3	Jockey	LINE	-0.170393	-0.171654	4.7596	0.883015	1
KibiFr1	L1	LINE	0.243187	0.243262	9.25629	0.502345	1
Kiri-3_CQ	L2	LINE	-0.0706079	-0.0706728	7.75453	0.909043	1
Kolobok-12_CGi	DNA	DNA	-0.0468665	-0.0469312	7.22798	0.923094	1
Kolobok-18_HM	Kolobok-Hydra	DNA	-0.493233	-0.495698	6.04528	0.529613	1
Kolobok-1_DR	Kolobok-T2	DNA	-0.71578	-0.725882	4.39084	0.486423	1
Kolobok-1_Ppac	Kolobok-T2	DNA	0.0965051	0.0967618	7.32313	0.860064	1
Kolobok-2_AP	DNA	DNA	-0.990895	-1.00017	5.87116	0.236922	1
Kolobok-2_CGi	Kolobok-T2	DNA	0.620556	0.624859	6.96695	0.424914	1
Kolobok-2_XT	Kolobok-T2	DNA	-0.0793308	-0.0795404	5.5559	0.89827	1
Kolobok-3_Aplcal	Kolobok-Hydra	DNA	0.638521	0.640106	6.53292	0.296184	1
Kolobok-6_CGi	Kolobok-Hydra	DNA	-0.577025	-0.580124	7.26208	0.259212	1
Kolobok-N1_AEc	DNA	DNA	0.0273275	0.0273744	8.228	0.958519	1
Kolobok-N4_XT	Kolobok-T2	DNA	0.316302	0.316404	9.40975	0.402068	1
Kolobok-N7_CGi	Kolobok	DNA	0.412025	0.432872	4.95016	0.751912	1
L1-102_DR	L1	LINE	-0.816914	-0.820116	5.38374	0.340609	1
L1-105_DR	L1	LINE	0.0190881	0.019134	5.65551	0.9799	1
L1-108_DR	L1	LINE	-0.406826	-0.409852	4.73928	0.718811	1
L1-10_DR	L1	LINE	0.505439	0.51304	4.5591	0.567625	1
L1-111_DR	L1	LINE	0.669631	0.676738	4.64135	0.435633	1
L1-11_DR	L1	LINE	-0.210444	-0.210728	7.96036	0.59983	1
L1-13_LCh	LINE	LINE	-1.52717	-1.54921	3.87623	0.331444	1
L1-14_XT	L1	LINE	0.576677	0.582612	4.04097	0.642324	1
L1-16_DR	L1	LINE	-0.532382	-0.534836	5.20907	0.646149	1
L1-19_DR	L1	LINE	0.432554	0.434727	4.92289	0.662799	1
L1-1_AFC	L1	LINE	0.218057	0.218068	11.6948	0.482092	1
L1-1D_Cpo	L1	LINE	1.33343	1.44611	4.21747	0.26696	1
L1-1_DN	L1	LINE	-0.294464	-0.296168	6.98588	0.640729	1
L1-1_DR	L1	LINE	-0.158389	-0.160061	4.69404	0.852962	1
L1-1_FR	L1	LINE	-0.537129	-0.546151	3.53014	0.728933	1
L1-1_OP	L1	LINE	1.2169	1.22814	4.33038	0.25693	1
L1-1_Vpa	L1	LINE	1.26997	1.29203	4.63703	0.259146	1
L1-1_XT	L1	LINE	1.0339	1.05638	4.68027	0.34582	1
L1-21_DR	L1	LINE	0.422294	0.424402	5.0083	0.600208	1
L1-21_Lch	LINE	LINE	0.768834	0.777082	4.17012	0.518659	1
L1-22_XT	L1	LINE	-0.876907	-0.881875	4.69687	0.378949	1
L1-24_DR	L1	LINE	-0.0876603	-0.0878344	7.27439	0.907984	1
L1-25_DR	L1	LINE	-0.375292	-0.376161	6.21318	0.575897	1
L1-26_DR	L1	LINE	0.761015	0.76944	4.33578	0.4579	1
L1-2_CPB	L1	LINE	-0.718367	-0.729481	4.91224	0.39112	1
L1-2_DR	L1-Tx1	LINE	2.22267	2.2581	4.39328	0.268362	1
L1-31_DR	L1	LINE	-0.720452	-0.726989	4.65622	0.510954	1
L1-34_DR	L1	LINE	0.408556	0.41324	4.37165	0.651754	1
L1-35_DR	L1	LINE	1.42038	1.43884	3.8987	0.207658	1
L1-36_ACar	L1	LINE	-0.442738	-0.443602	6.50814	0.49624	1
L1-37_DR	L1	LINE	-0.821929	-0.832755	4.11439	0.595967	1
L1-3_TS	L1	LINE	0.67637	0.681202	5.43336	0.348543	1
L1-3_XT	L1	LINE	-0.00694271	-0.00557258	5.25182	0.995946	1
L1-40_DR	L1	LINE	0.500206	0.500356	8.7313	0.272873	1
L1-44_DR	L1	LINE	0.412165	0.417279	4.14144	0.682349	1
L1-45_DR	L1	LINE	-0.0499648	-0.0500567	6.9574	0.914896	1
L1-47B_ACar	L1	LINE	-0.0630152	-0.0630451	8.63798	0.874787	1
L1-48_DR	L1	LINE	-0.149849	-0.150171	7.07433	0.799763	1
L1-49_DR	L1	LINE	0.250462	0.252663	4.26246	0.813564	1
L1-50_DR	L1	LINE	0.148897	0.149329	6.24205	0.805165	1
L1-51_DR	L1	LINE	-0.159299	-0.159598	6.45871	0.786124	1
L1-55_DR	L1	LINE	-0.420056	-0.426162	5.54892	0.696097	1
L1-56_DR	L1	LINE	0.0993589	0.0994992	7.05134	0.822493	1
L1-60_ACar	L1	LINE	0.194941	0.195525	6.94469	0.683976	1
L1-62_DR	L1	LINE	-1.46622	-1.48012	4.34856	0.326017	1
L1-63_DR	L1	LINE	-0.0195384	-0.0197023	5.69958	0.982097	1
L1-65_DR	L1	LINE	0.0170109	0.0170783	5.17963	0.988359	1
L1-66_DR	L1	LINE	-0.955476	-0.960071	6.19194	0.290848	1
L1-68_DR	L1	LINE	-0.0863218	-0.0865379	5.99839	0.904085	1
L1-70_DR	L1-Tx1	LINE	-0.405322	-0.409465	4.60122	0.700029	1
L1-72_DR	L1	LINE	1.54215	1.56923	3.84161	0.221789	1
L1-74_DR	L1-Tx1	LINE	-0.477749	-0.478862	6.05082	0.468219	1
L1-75_DR	L1	LINE	0.100574	0.100863	5.77905	0.886	1
L1-81_DR	L1	LINE	-0.492182	-0.502212	3.46083	0.784882	1
L1-82_ACar	L1	LINE	-0.314616	-0.31881	3.71355	0.82924	1
L1-82_DR	L1	LINE	-0.137077	-0.139234	3.98119	0.912114	1
L1-83_DR	L1	LINE	0.0444289	0.0446019	4.99078	0.950426	1
L1-85_DR	L1-Tx1	LINE	-0.8392	-0.842802	5.36169	0.300811	1
L1-89_DR	L1	LINE	-0.240884	-0.242706	5.11177	0.834889	1
L1-8_DR	L1	LINE	0.0153546	0.015398	7.77195	0.972867	1
L1-94_DR	L1	LINE	-0.530386	-0.5345	4.41651	0.63297	1
L1-95_DR	L1	LINE	0.705837	0.709691	5.23189	0.419296	1
L1A_Oc	L1	LINE	0.351573	0.355944	6.06527	0.700644	1
L1_Cf	L1	LINE	0.169547	0.170887	4.31441	0.898215	1
L1Hylob	L1	LINE	0.128323	0.128781	5.23907	0.900694	1
L1M3	L1	LINE	1.05559	1.06866	4.40622	0.353334	1
L1MC4	L1	LINE	0.0411374	0.0412181	5.57521	0.954073	1
L1MdF_II	L1	LINE	0.423208	0.45942	6.27925	0.659564	1
L1MdGf_I	L1	LINE	-0.429766	-0.433877	5.72331	0.635703	1
L1MdMus_II	L1	LINE	-1.39132	-1.42098	3.65494	0.230358	1
L1_Mur1	L1	LINE	0.37669	0.384626	6.74439	0.689881	1
L1PA14	L1	LINE	1.02885	1.05379	3.66153	0.666823	1
L2-11_DRe	L2	LINE	0.666471	0.672251	4.834	0.428833	1
L2-12a_Lch	LINE	LINE	-0.284547	-0.288482	3.63015	0.809691	1
L2-12b_Lch	LINE	LINE	-0.0927893	-0.0928945	8.05556	0.815046	1
L2-13b_Lch	LINE	LINE	-0.0655411	-0.066322	3.8603	0.948117	1
L2-14_DRe	L2	LINE	-0.608052	-0.608796	6.9786	0.22192	1
L2-16_DRe	Rex-Babar	LINE	-0.0128777	-0.0128896	7.19933	0.977323	1
L2-17_DRe	L2	LINE	0.220699	0.221536	5.97728	0.739502	1
L2-17_NV	L2	LINE	-1.00625	-1.01705	5.04188	0.36102	1
L2-1c_Cis	L2	LINE	0.237385	0.238907	5.37593	0.730552	1
L2-1_DR	L2	LINE	0.43402	0.4349	7.14624	0.501181	1
L2-1_FR1	L2	LINE	-0.0901591	-0.0902395	8.82921	0.847544	1
L2-23_ACar	L2	LINE	-0.719689	-0.72811	4.75797	0.422718	1
L2-25_ACar	L2	LINE	0.327149	0.328104	5.93864	0.597751	1
L2-32_DRe	L2	LINE	0.221035	0.221283	7.91622	0.573808	1
L2-34_DR	L2	LINE	0.222762	0.223138	6.51387	0.656998	1
L2-41_DRe	L2	LINE	-0.206439	-0.206474	10.345	0.685687	1
L2-42_DRe	L2	LINE	-0.269605	-0.270501	6.20608	0.616519	1
L2-43_DR	L2	LINE	-0.209686	-0.209749	9.13984	0.581683	1
L2-44_DR	L2	LINE	-0.253113	-0.253682	6.12932	0.670218	1
L2-45_DR	L2	LINE	-0.436574	-0.43756	6.10989	0.513923	1
L2-46_DR	L2	LINE	0.20543	0.20553	8.90088	0.597585	1
L2-4_DRe	L2	LINE	0.829988	0.844491	3.71024	0.571397	1
L2-4_LCh	LINE	LINE	-0.241126	-0.241977	5.5051	0.708107	1
L2-51_DR	L2	LINE	0.0947635	0.0949009	6.91877	0.850515	1
L2-54_DR	L2	LINE	-0.0988676	-0.0989124	8.6278	0.788874	1
L2-5_LCh	LINE	LINE	-0.187604	-0.19299	4.3769	0.856902	1
L2-5_NVi	L2	LINE	-1.07345	-1.0944	4.90322	0.332153	1
L2-5_PM	L2	LINE	0.200819	0.201052	6.9828	0.701226	1
L2-68_HMa	L2	LINE	0.790907	0.799313	4.26474	0.511457	1
L2-6_DRe	L2	LINE	-0.0500247	-0.0501354	7.29701	0.9454	1
L2-7_DRe	L2	LINE	-0.121351	-0.121595	7.12453	0.823668	1
L2-8_LCh	LINE	LINE	-0.987602	-0.996957	4.14099	0.417748	1
L2-9_LCh	LINE	LINE	0.577988	0.579145	6.23971	0.365488	1
L2_AC_14	L2	LINE	0.118518	0.11901	7.24231	0.872037	1
L2B-2_AAe	L2	LINE	-0.235884	-0.239446	5.2399	0.793388	1
L2B-4_AAe	L2	LINE	-0.29691	-0.299314	6.03834	0.691703	1
L2B-4B_AAe	L2	LINE	-0.633049	-0.646085	4.12148	0.621346	1
L2B-5_AAe	L2	LINE	0.0801858	0.0804978	7.02973	0.882015	1
L2_Plat1i	L2	LINE	-0.00427454	-0.0042207	5.1844	0.997427	1
LIN4b_SM	R2	LINE	-0.565489	-0.570613	5.11624	0.477957	1
LINEX-1_DR	Retroposon	Retroposon	0.36433	0.365373	6.09757	0.604598	1
Loa-1_LHu	LINE	LINE	0.129295	0.129391	7.89267	0.75189	1
LOOPERN2_DR	Kolobok-T2	DNA	0.105196	0.105299	8.85161	0.817362	1
LOOPERN3B_DR	Kolobok-T2	DNA	-0.813207	-0.819933	5.57069	0.249402	1
LOOPERN6_DR	PiggyBac	DNA	-0.616524	-0.63143	3.45407	0.720478	1
LOR1-int	ERV1	LTR	-0.444092	-0.447517	4.30886	0.670389	1
LSU-rRNA_Hsa	rRNA	rRNA	0.555342	0.559663	4.98592	0.455167	1
LTR11_Ami	Gypsy	LTR	-0.750119	-0.755928	6.15702	0.270941	1
LTR11B2a2_EE	ERVK	LTR	-0.0138967	-0.0139115	5.37798	0.984275	1
LTR-12A_Crp	ERV1	LTR	0.101829	0.103695	3.85019	0.940573	1
LTR-12B1_Crp	ERV1	LTR	-0.538084	-0.542293	6.52695	0.375889	1
LTR12B_Tbel	ERV1	LTR	-0.300562	-0.301902	5.70756	0.677272	1
LTR-12D_Crp	ERV1	LTR	0.0520477	0.0520394	4.94808	0.967931	1
LTR-12D_Gav	ERV1	LTR	0.568124	0.568711	7.29765	0.221226	1
LTR13B_EE	ERVK	LTR	1.5665	1.59365	3.83946	0.284839	1
LTR-13_Crp	ERV4	LTR	1.2059	1.25777	3.44499	0.524341	1
LTR-14A1_Crp	Gypsy	LTR	0.519365	0.520888	5.8566	0.402534	1
LTR-1525_AMi	Gypsy	LTR	0.159406	0.15986	6.28576	0.772413	1
LTR176A3_MD	ERV1	LTR	-0.790079	-0.805192	4.98238	0.393254	1
LTR18_Cja	ERV1	LTR	-1.55435	-1.59276	3.69601	0.394445	1
LTR1B2_OG	ERV1	LTR	-0.657107	-0.660747	5.20571	0.506723	1
LTR-1B_NV	LTR	LTR	-0.689002	-0.693278	5.77954	0.325579	1
LTR24_Sar	ERVK	LTR	0.45356	0.453672	9.53564	0.256112	1
LTR2C_Opr	ERVK	LTR	0.521357	0.52241	7.81732	0.218592	1
LTR32_Ttr	ERV1	LTR	0.526444	0.530546	6.48413	0.402282	1
LTR34	ERV1	LTR	1.36458	1.5247	5.43608	0.250697	1
LTR4_Str	ERVK	LTR	0.772669	0.778815	5.25805	0.301494	1
LTR-522_AMi	Gypsy	LTR	0.302445	0.306509	6.03514	0.771788	1
LTR5B	ERVK	LTR	-0.138248	-0.141614	5.70223	0.888876	1
LTR-651_AMi	LTR	LTR	0	0	4.33388	1	1
LTR87B_MD	ERV1	LTR	0.924981	0.966789	3.69925	0.57704	1
LTR-882_AMi	ERV1	LTR	1.02747	1.03758	4.80742	0.245284	1
Mariner-101_HSal	DNA	DNA	0.138363	0.142549	3.80549	0.928113	1
Mariner-10_DR	TcMar-Tc1	DNA	0.262917	0.263737	5.95449	0.724829	1
Mariner-11_DR	TcMar-Tc1	DNA	0.81204	0.815041	5.86344	0.22789	1
Mariner-14_LCh	DNA	DNA	0.00460523	0.00461561	5.99471	0.995271	1
Mariner-14_SIn	DNA	DNA	-0.874003	-0.893553	5.87139	0.28678	1
Mariner-15_SIn	DNA	DNA	0.116708	0.116887	7.47124	0.790232	1
Mariner-17_AEc	DNA	DNA	0.403367	0.403638	8.51274	0.298339	1
Mariner-18_HSal	DNA	DNA	-0.122596	-0.122658	8.86589	0.760625	1
Mariner-19_HSal	DNA	DNA	0.249721	0.250888	5.2173	0.774052	1
Mariner-1_DR	TcMar-Tc1	DNA	0.0568368	0.0568985	8.5781	0.903458	1
Mariner-1_DT	TcMar-Tc1	DNA	-1.99482	-2.02489	3.80217	0.233332	1
Mariner-1_OL	TcMar-ISRm11	DNA	0.0823379	0.0823829	7.73905	0.847006	1
Mariner-1_SP	TcMar-Fot1	DNA	1.19584	1.22338	3.29528	0.409578	1
Mariner-21N3_CGi	TcMar-m44	DNA	0.90272	0.90976	5.05214	0.252443	1
Mariner-21_SIn	DNA	DNA	0.0810557	0.0811619	8.26343	0.864367	1
Mariner-23_AEc	DNA	DNA	0.172295	0.173323	5.00504	0.892821	1
Mariner-23_LCh	DNA	DNA	-0.326295	-0.334372	3.71198	0.840265	1
Mariner-25_LCh	DNA	DNA	0.786959	0.796182	5.62263	0.273074	1
Mariner-28_DF	TcMar-Tc1	DNA	-0.502782	-0.521644	5.33006	0.589529	1
Mariner-29_AEc	DNA	DNA	-0.161561	-0.161972	7.14144	0.737418	1
Mariner-2_DR	TcMar-Tc1	DNA	1.04709	1.06005	4.59644	0.323244	1
Mariner-2_GA	TcMar-ISRm11	DNA	-0.496796	-0.497819	7.79592	0.296009	1
Mariner-30_HM	TcMar-Fot1	DNA	-0.403439	-0.404043	7.74113	0.373178	1
Mariner-34_SM	TcMar-Pogo	DNA	-0.707929	-0.712665	7.07038	0.210429	1
Mariner-36_HM	TcMar-Fot1	DNA	-0.964502	-0.978031	3.86454	0.394421	1
Mariner-38B_SIn	DNA	DNA	-0.476144	-0.477772	7.05483	0.344562	1
Mariner-39_HM	TcMar-Fot1	DNA	0.134875	0.135507	7.2238	0.799478	1
Mariner-3_DR	TcMar-ISRm11	DNA	0.632206	0.645763	4.45931	0.523424	1
Mariner-3_GA	TcMar-ISRm11	DNA	-0.367689	-0.369615	5.02881	0.638713	1
Mariner-3_NV	TcMar-ISRm11	DNA	0.951531	0.960826	6.28412	0.221734	1
Mariner-3_OL	TcMar-ISRm11	DNA	0.689089	0.690608	6.18631	0.280598	1
Mariner4_CE	TcMar-Mariner	DNA	-0.301822	-0.30311	5.22145	0.680163	1
Mariner-4_DR	TcMar-Tc1	DNA	-0.220807	-0.220845	10.0776	0.539718	1
Mariner-4_LHu	DNA	DNA	1.26508	1.28603	4.33896	0.29386	1
Mariner-52_HSal	DNA	DNA	0.153147	0.15319	9.78042	0.656558	1
Mariner-52N1_HSal	DNA	DNA	0.755791	0.767073	4.06926	0.506878	1
Mariner-5_CFl	DNA	DNA	-0.0144701	-0.0149216	6.74769	0.984506	1
Mariner-5_GA	TcMar-ISRm11	DNA	1.04163	1.06399	4.21953	0.450364	1
Mariner-5_SIn	DNA	DNA	0.063859	0.0641786	4.89742	0.946819	1
Mariner-5_XT	TcMar-Tc2	DNA	0.108594	0.10907	5.59483	0.885099	1
MARINER60_CB	TcMar-Tc4	DNA	1.82127	2.17935	3.79248	0.213689	1
Mariner-62_HSal	DNA	DNA	0.160508	0.160556	9.78385	0.673262	1
Mariner-68_HSal	DNA	DNA	0.270994	0.272056	6.29751	0.645165	1
Mariner-6_DF	TcMar-Mariner	DNA	-0.0246003	-0.0246434	6.48689	0.975513	1
Mariner-6_DR	TcMar-Tc1	DNA	0.08036	0.0804117	8.23002	0.848407	1
Mariner-79B_HSal	DNA	DNA	0.509684	0.511696	6.75206	0.379076	1
Mariner-79_HSal	DNA	DNA	-0.175425	-0.176404	6.80915	0.769473	1
Mariner-7_XT	DNA	DNA	-0.0124728	-0.0124868	6.51688	0.98427	1
Mariner-801_AMi	TcMar-Tigger	DNA	-0.179924	-0.180851	5.22457	0.853336	1
Mariner-8_DAn	TcMar-Tc1	DNA	-0.207236	-0.208413	4.75626	0.840792	1
Mariner-8_LCh	DNA	DNA	-0.962454	-0.966809	5.91188	0.270292	1
Mariner-9_DR	TcMar-Tc1	DNA	-0.482343	-0.483822	6.17767	0.439356	1
Mariner-N10_DR	TcMar-Tc2	DNA	-0.152979	-0.15422	4.06945	0.883743	1
Mariner-N10_HSal	DNA	DNA	-0.945753	-0.957936	3.83845	0.499992	1
Mariner-N10_SIn	DNA	DNA	-0.0329107	-0.0330534	4.6756	0.974028	1
Mariner-N13_DR	TcMar-Tc1	DNA	0.0896997	0.089703	12.5885	0.771355	1
Mariner-N13_HSal	DNA	DNA	-0.133283	-0.133504	8.82041	0.740968	1
Mariner-N27_HSal	DNA	DNA	0.211012	0.211428	7.01839	0.708638	1
Mariner-N2_DR	TcMar	DNA	0.5163	0.531313	4.04458	0.699631	1
Mariner-N3_DR	CMC-EnSpm	DNA	0.820591	0.835072	3.7941	0.590882	1
Mariner-N41_HSal	DNA	DNA	-0.510378	-0.515273	4.39943	0.644475	1
Mariner-N5_HSal	DNA	DNA	0.466682	0.46991	5.16799	0.547885	1
Maui	L2	LINE	-0.122963	-0.122967	12.5519	0.686788	1
MdoERV2-int	ERV1	LTR	-0.35676	-0.358137	5.36757	0.660755	1
MdoLTR2-int	ERV1	LTR	-0.0395803	-0.0405839	4.20435	0.969725	1
MER101-int	ERV1	LTR	0.270236	0.270252	10.8352	0.585343	1
MER41-int	ERV1	LTR	-0.560598	-0.561591	6.71765	0.363643	1
MER49	ERV1	LTR	-1.04875	-1.08246	6.99649	0.2521	1
MER6	TcMar-Tigger	DNA	-0.106931	-0.107192	6.71144	0.824604	1
MER6A	TcMar-Tigger	DNA	0.184164	0.184744	6.26422	0.812925	1
Merlin-1_DR	Merlin	DNA	0.0976439	0.0976831	9.09594	0.801526	1
MINIME_DN	Unknown	Unknown	-0.0985491	-0.0999668	4.8191	0.8971	1
MinoAg1	R1	LINE	-0.289889	-0.292017	4.79481	0.773158	1
MIRAGE1	CMC-Mirage	DNA	0.198303	0.199791	4.4671	0.854881	1
MIR_Aves1	MIR	SINE	-1.18036	-1.19947	3.74101	0.417065	1
MMERVK10D3_I-int	ERVK	LTR	0.539908	0.548634	5.44325	0.551917	1
MMERVK9C_I-int	ERVK	LTR	0.374549	0.375171	6.58232	0.532578	1
MMERVK9E_I-int	ERVK	LTR	0.671214	0.675401	5.41577	0.448089	1
MMETn-int	ERVK	LTR	0.15953	0.161967	3.44431	0.927543	1
MMSAT4	Satellite	Satellite	-0.410109	-0.41038	9.51556	0.269604	1
MonoRep204	Segmental	Segmental	-0.657428	-0.700597	4.2132	0.650996	1
MOSAT-2_DR	Satellite	Satellite	-0.488969	-0.495878	4.9298	0.62834	1
Mothra_OL	TcMar-Tc1	DNA	-1.29858	-1.33455	3.91391	0.345812	1
MRE1_OL	Unknown	Unknown	0.388536	0.389698	7.591	0.46643	1
MuDr-1_BF	MULE-NOF	DNA	-0.194459	-0.195263	5.43975	0.803106	1
MuDr-1x_SP	MULE-MuDR	DNA	-0.478159	-0.483263	4.84454	0.634749	1
MuDr-3_HM	MULE-MuDR	DNA	-0.222954	-0.224885	4.58322	0.792999	1
MurERV4_19-int	ERVK	LTR	0.00738528	0.00742972	3.83345	0.994857	1
Nematis_Cr	Penelope	LINE	0.796221	0.802599	4.67725	0.382428	1
Neptune3_Ren	Penelope	LINE	0.721473	0.746227	4.19724	0.583017	1
Neptune_Hyd	Penelope	LINE	-0.398212	-0.399251	6.08996	0.531161	1
Ngaro1_DR	Ngaro	LTR	0.111109	0.111362	7.20418	0.845849	1
Nimb-12_DR	I	LINE	-0.16971	-0.169936	7.68938	0.762971	1
Nimb-14_DR	I	LINE	-0.106284	-0.106375	7.62891	0.805443	1
Nimb-15_DR	I	LINE	-0.900295	-0.904212	6.05792	0.284935	1
Nimb-16_DR	I	LINE	-0.265015	-0.265552	6.02758	0.631957	1
Nimb-1_DR	I	LINE	0.108195	0.108534	5.77224	0.862972	1
Nimb-3_DR	I	LINE	-0.424863	-0.436086	3.73447	0.775953	1
Nimb-4_DR	I	LINE	-1.02459	-1.02831	5.76328	0.261192	1
Nimb-8_DR	I	LINE	0.274934	0.275498	7.42511	0.589021	1
Nimb-9_DR	I	LINE	-0.296151	-0.300046	4.23606	0.769127	1
Nimbus	I	LINE	-1.03255	-1.05871	3.41952	0.577436	1
NonLTR-1C_DR	Retroposon	Retroposon	0.108175	0.108718	5.26717	0.915278	1
ONSATB	Satellite	Satellite	1.13578	1.14905	4.31037	0.342524	1
ORTE-1_AAe	RTE-BovB	LINE	0.398594	0.399687	6.74524	0.522834	1
OSSINE1	5S-Deu-L2	SINE	0.695211	0.701087	5.10801	0.490501	1
P-11_HM	P	DNA	-0.093971	-0.0944759	4.82806	0.91537	1
P-15_HM	P	DNA	-0.778954	-0.784571	5.12865	0.455694	1
P-1_DR	P	DNA	-0.101027	-0.101093	7.43766	0.84893	1
P-1_LHu	DNA	DNA	-0.970123	-0.981167	3.85196	0.401451	1
P-24_HM	P	DNA	-0.142157	-0.142636	5.466	0.876025	1
P-28_HM	P	DNA	0.989694	1.01352	5.91674	0.206718	1
P-29_HM	P	DNA	0.416302	0.41646	9.45746	0.334849	1
P-30_HM	P	DNA	-0.279814	-0.280621	5.66737	0.695679	1
P-35_HM	P	DNA	0.767359	0.772413	5.07209	0.454398	1
P-4_HM	P	DNA	0.95581	0.961252	5.25996	0.214202	1
PAO_LTR	Pao	LTR	0.684176	0.691429	4.89649	0.450204	1
P_DB	P	DNA	-1.12771	-1.13684	5.04681	0.312796	1
Penelope-13_HM	Penelope	LINE	-0.264554	-0.264708	9.37114	0.562664	1
Penelope-1_AFC	Penelope	LINE	0.183699	0.183716	10.9626	0.567646	1
Penelope-1_DR	Penelope	LINE	-0.804614	-0.80664	5.86746	0.294516	1
Penelope1D_XT	Penelope	LINE	-0.197215	-0.205081	4.02675	0.897652	1
Penelope-1_Gav	Penelope	LINE	-0.115948	-0.116277	7.05227	0.841078	1
Penelope-1_OL	Penelope	LINE	0.445628	0.452205	5.23434	0.717096	1
Penelope-1_SIn	LINE	LINE	0.386708	0.388989	5.75549	0.608868	1
Penelope-2_DR	Penelope	LINE	-0.96015	-0.966797	4.645	0.355252	1
Penelope-5_XT	Penelope	LINE	-0.405147	-0.405443	8.04384	0.302132	1
Penelope-6_XT	Penelope	LINE	0.510692	0.51676	4.15899	0.645752	1
Penelope_Ele2	Penelope	LINE	-0.123586	-0.124132	7.55105	0.820192	1
piggyBac-1_BF	PiggyBac	DNA	0.64374	0.651327	4.7013	0.460303	1
piggyBac-1_DR	PiggyBac	DNA	-0.263045	-0.263248	8.70281	0.494924	1
piggyBac-1_LCh	DNA	DNA	1.72312	2.08147	4.70183	0.270049	1
piggyBac-2_SM	PiggyBac	DNA	-1.92774	-1.96983	3.34864	0.24043	1
piggyBac-2_XT	PiggyBac	DNA	-0.340664	-0.34385	5.41802	0.76517	1
piggyBac-5_CGi	PiggyBac	DNA	0.740563	0.803992	4.79427	0.511543	1
piggyBac-8_SM	PiggyBac	DNA	0.863447	0.872303	3.99006	0.552979	1
piggyBac-N13_DR	PiggyBac	DNA	1.61153	1.62883	4.11871	0.223079	1
piggyBac-N5_DR	PiggyBac	DNA	0.32744	0.332091	3.80053	0.793925	1
piggyBac-N6_DR	PiggyBac	DNA	-0.312741	-0.315214	5.73379	0.718834	1
PIGGYB_SM	PiggyBac	DNA	-0.999233	-1.03584	5.24212	0.291054	1
Pigibakku	PiggyBac	DNA	-0.218104	-0.218387	8.88413	0.601329	1
PIVE	DNA_virus	Other	0.949877	0.96346	4.49147	0.334696	1
PlatLTR35b	ERVL	LTR	1.2549	1.28236	3.40512	0.461366	1
PlatSat2A	Satellite	Satellite	0.135217	0.136951	4.14686	0.896931	1
POLINTN1_SM	DNA	DNA	-0.782958	-0.790654	4.57982	0.533605	1
Polinton-1_CGi	Maverick	DNA	-0.0934966	-0.0939052	6.32122	0.884069	1
Polinton-1_CPB	Maverick	DNA	-0.125204	-0.125951	5.09103	0.870139	1
Polinton-1_DAn	Maverick	DNA	0.247464	0.252659	3.83016	0.852034	1
Polinton-1_DEu	Maverick	DNA	-0.113297	-0.113687	7.98875	0.829904	1
Polinton-1_DGr	Maverick	DNA	1.95904	2.00072	5.22701	0.218674	1
Polinton-1_DR	Maverick	DNA	0.248877	0.248904	10.8124	0.525085	1
Polinton-1_LCh	DNA	DNA	0.615582	0.617147	7.11539	0.306417	1
Polinton-1N1_DR	Maverick	DNA	-0.198245	-0.198413	7.25714	0.697474	1
Polinton-1_NVi	Maverick	DNA	1.00325	1.02643	3.77599	0.555895	1
Polinton-1_SM	Maverick	DNA	-0.182891	-0.184651	5.18502	0.849597	1
Polinton1_SM	Maverick	DNA	-0.168852	-0.169268	8.00774	0.799415	1
Polinton-1_SP	Maverick	DNA	0.0505617	0.0506483	8.40209	0.902577	1
Polinton-2_AMi	Maverick	DNA	-0.0946181	-0.0949205	6.54006	0.881386	1
Polinton-2A_NV	Maverick	DNA	0.288964	0.289101	9.63508	0.434365	1
Polinton-2_DBi	Maverick	DNA	0.694689	0.754117	4.36538	0.62142	1
Polinton-2_DR	Maverick	DNA	0.659085	0.661237	7.36575	0.345637	1
Polinton-2_HM	Maverick	DNA	-0.100904	-0.100918	10.3674	0.784066	1
Polinton-2_PBa	DNA	DNA	0.874097	0.890076	7.21768	0.258963	1
Polinton-3_TC	Maverick	DNA	-0.0257736	-0.019609	3.97945	0.989996	1
Polinton-5_NV	Maverick	DNA	0.230183	0.231097	6.22417	0.816912	1
Polinton-5_NVi	Maverick	DNA	-0.0515337	-0.0515393	10.6015	0.904507	1
Polinton-5_SP	Maverick	DNA	1.20937	1.22121	4.0949	0.330997	1
Polinton-7_NVi	Maverick	DNA	-1.05036	-1.06126	5.45583	0.266043	1
Polinton-8_NVi	Maverick	DNA	0.904999	0.923488	4.40244	0.45468	1
Polinton-9_NVi	Maverick	DNA	-0.55728	-0.57034	4.18152	0.601649	1
Poseidon-10_HM	Penelope	LINE	0	0	4.51424	1	1
Proto2-7_CS1	Proto2	LINE	0.00324859	0.00322019	5.74201	0.996017	1
Proto2-8_CS1	Proto2	LINE	0.687599	0.696569	4.84242	0.438803	1
R1-2_DEl	R1	LINE	-0.21356	-0.215268	6.28013	0.737785	1
R1-5_BM	R1	LINE	0.880455	0.883723	6.39791	0.250817	1
R1_DPs	R1	LINE	1.9476	2.14374	3.98928	0.256836	1
R1_DYa	R1	LINE	0.148073	0.148548	7.55504	0.764882	1
R2-N2_Gav	R2	LINE	0.996379	1.00214	5.09201	0.256687	1
R7Ag2	R1	LINE	-0.602295	-0.608127	5.00903	0.469233	1
RC123	Satellite	Satellite	-0.73405	-0.746166	3.52456	0.666126	1
Rehavkus-2_NVi	MULE-NOF	DNA	0.097601	0.0977594	7.61666	0.849049	1
REP131	DNA	DNA	0.6234	0.624032	6.90737	0.330916	1
REP-2_CPB	Unknown	Unknown	-0.699569	-0.710544	5.09629	0.576289	1
REP-4_CQ	Unknown	Unknown	0.460184	0.461512	5.88422	0.580999	1
REP-4_PBa	Unknown	Unknown	0.431663	0.431699	10.9458	0.27113	1
REP-6_CPB	Unknown	Unknown	0.404808	0.407005	6.09523	0.469448	1
Rex1-1_ACar	Rex-Babar	LINE	0.126513	0.126927	5.20601	0.874496	1
REX1-1_AFC	Rex-Babar	LINE	-0.0155016	-0.0155046	9.52601	0.967155	1
Rex1-1B_FR	Rex-Babar	LINE	-0.133859	-0.13393	8.06919	0.759057	1
REX1-1_DR	Rex-Babar	LINE	0.135301	0.135441	7.33318	0.777174	1
Rex1-1_FR	Rex-Babar	LINE	0.862047	0.864596	6.27734	0.212915	1
REX1-1_GA	Rex-Babar	LINE	-0.630313	-0.632413	6.43412	0.266245	1
Rex1-1_PM	Rex-Babar	LINE	0.0478294	0.0478517	8.53305	0.90401	1
Rex1-21_DRe	Rex-Babar	LINE	-0.767141	-0.773044	5.52304	0.417459	1
Rex1-23_DRe	Rex-Babar	LINE	0.516218	0.526464	3.23729	0.766476	1
Rex1-26_DRe	Rex-Babar	LINE	0.0204234	0.0204439	6.72084	0.969219	1
REX1-2_AFC	Rex-Babar	LINE	-0.0338327	-0.033843	8.89059	0.921764	1
REX1-2_DR	Rex-Babar	LINE	0.236298	0.237269	5.29186	0.741535	1
Rex1-2_FR	Rex-Babar	LINE	0.336712	0.33772	5.57878	0.628788	1
REX1-2_XT	Rex-Babar	LINE	0.245049	0.245289	7.82598	0.610519	1
Rex1-31_DRe	Rex-Babar	LINE	-0.149022	-0.149072	8.94249	0.678999	1
REX1-3_AFC	Rex-Babar	LINE	-0.239229	-0.239273	9.58543	0.527851	1
Rex1-3_FR	Rex-Babar	LINE	0.0310502	0.0310923	6.87223	0.954329	1
REX1-3_XT	Rex-Babar	LINE	0.0288493	0.0314332	3.97361	0.979967	1
Rex1-40_DRe	Rex-Babar	LINE	0.382479	0.38374	5.95153	0.51369	1
REX1-4_AFC	Rex-Babar	LINE	-0.254612	-0.254665	9.826	0.448459	1
REX1-4_XT	Rex-Babar	LINE	-0.600743	-0.603972	5.73704	0.38694	1
REX1-5_DR	Rex-Babar	LINE	-0.105957	-0.106072	7.02979	0.826857	1
REX1-5_XT	Rex-Babar	LINE	0.380806	0.385675	4.04976	0.73095	1
Rex1-6_DR	Rex-Babar	LINE	0.903851	0.911786	4.67702	0.364723	1
REX1-6_XT	Rex-Babar	LINE	0.240272	0.240523	6.99284	0.639747	1
REX1-7_DR	Rex-Babar	LINE	-0.208993	-0.211942	4.40647	0.813242	1
REX1-7_XT	Rex-Babar	LINE	-0.437708	-0.438262	7.22901	0.373397	1
REX1-8_XT	Rex-Babar	LINE	-0.556413	-0.558117	5.62239	0.638845	1
REX1-9_DR	Rex-Babar	LINE	0.690529	0.694877	5.01656	0.461414	1
REX1-9_XT	Rex-Babar	LINE	0.0624762	0.063498	5.09376	0.951387	1
REX1_CY	Rex-Babar	LINE	0.152847	0.153183	5.96267	0.824836	1
Rex1_FurC	Rex-Babar	LINE	0.344362	0.344585	7.89694	0.385889	1
REX3_XM	RTE	LINE	0.0648603	0.0649127	8.79745	0.868438	1
RLTR14-int	ERV1	LTR	0.38099	0.384561	4.80925	0.696659	1
RLTR19-int	ERVK	LTR	-0.193522	-0.194205	5.70283	0.77461	1
RLTR20C1_MM	ERVK	LTR	-0.291527	-0.29283	7.82358	0.63553	1
RLTR32_Rn	ERVK	LTR	0.222576	0.222633	9.44198	0.553871	1
RLTR45-int	ERVK	LTR	0.501938	0.50379	6.21582	0.472434	1
RLTR9A3A	ERVK	LTR	0.306473	0.317372	4.93132	0.740678	1
RMER16_Mm	ERVK	LTR	-0.587391	-0.591193	6.88207	0.429563	1
AlRepA-102	TcMar-Tc1	DNA	0.00622009	0.00622026	13.1578	0.983555	1
AlRepA-125	PiggyBac	DNA	-0.0260572	-0.0260601	10.6918	0.937038	1
AlRepA-208	hAT-Charlie	DNA	0.00396713	0.00396858	9.43443	0.990638	1
AlRepA-21	L2	LINE	0.0447813	0.0447826	12.1124	0.896589	1
AlRepA-24	MIR	SINE	-0.157482	-0.157505	10.3118	0.630854	1
AlRepA-297	Unknown	Unknown	-0.176567	-0.176584	10.7846	0.675231	1
AlRepA-386	Ngaro	LTR	0.205317	0.205337	11.6223	0.520448	1
AlRepA-4	hAT-Charlie	DNA	-0.256423	-0.256433	12.947	0.385064	1
AlRepA-485	tRNA-Core	SINE	-0.216329	-0.216371	10.1182	0.523957	1
AlRepA-51	Unknown	Unknown	0.0981269	0.0981285	14.0211	0.727814	1
AlRepA-66	hAT-Ac	DNA	0.0819295	0.0819579	8.79415	0.831648	1
AlRepA-93	L2	LINE	0.0167518	0.0167522	12.4664	0.955865	1
AlRepB-103	RTE-BovB	LINE	0.163759	0.163768	12.0693	0.615755	1
AlRepB-11	DNA	DNA	-0.0940803	-0.0940982	10.0072	0.795733	1
AlRepB-112	Unknown	Unknown	-0.0599967	-0.0599995	12.2325	0.847322	1
AlRepB-114	Ngaro	LTR	-0.415093	-0.419657	3.89049	0.737696	1
AlRepB-126	hAT-Ac	DNA	-0.24216	-0.242253	8.78691	0.537258	1
AlRepB-127	DNA	DNA	0.383944	0.383993	10.0892	0.303325	1
AlRepB-128	Unknown	Unknown	-0.015778	-0.0157804	10.727	0.971827	1
AlRepB-13	Ngaro	LTR	-0.0353047	-0.035309	11.0974	0.91249	1
AlRepB-136	Unknown	Unknown	0.088655	0.0887069	8.69289	0.806713	1
AlRepB-14	Rex-Babar	LINE	-0.448499	-0.448755	8.37171	0.248744	1
AlRepB-148	Unknown	Unknown	0.37426	0.374592	7.36403	0.402605	1
AlRepB-157	Satellite	Satellite	0.808311	0.809794	6.1051	0.27577	1
AlRepB-160	L2	LINE	-0.215441	-0.215593	8.69771	0.590035	1
AlRepB-161	RTE-BovB	LINE	-0.0283139	-0.0283205	9.36063	0.939563	1
AlRepB-1625	Unknown	Unknown	0.549532	0.550615	6.66377	0.286603	1
AlRepB-173	Retroposon	Retroposon	0.0346341	0.0346365	11.2601	0.935035	1
AlRepB-180	hAT-Ac	DNA	0.0767954	0.0768041	11.1859	0.818439	1
AlRepB-185	DNA	DNA	0.249965	0.250144	7.81017	0.561178	1
AlRepB-193	Penelope	LINE	-0.0637549	-0.0637617	10.9299	0.843267	1
AlRepB-2	hAT-Ac	DNA	0.0869853	0.08701	9.34803	0.813391	1
AlRepB-200	Unknown	Unknown	0.0212211	0.0212259	9.90094	0.954451	1
AlRepB-221	Unknown	Unknown	0.0392843	0.0392947	9.80524	0.912606	1
AlRepB-234	PiggyBac	DNA	0.228423	0.228447	10.38	0.494204	1
AlRepB-26	L2	LINE	0.419007	0.419029	12.1001	0.247996	1
AlRepB-269	Unknown	Unknown	0.0266813	0.0266887	9.94383	0.940379	1
AlRepB-351	TcMar-Tc1	DNA	-0.0966285	-0.0966369	11.2896	0.765539	1
AlRepB-356	Unknown	Unknown	0.17298	0.173074	7.9542	0.713826	1
AlRepB-365	Unknown	Unknown	0.0184123	0.0184274	7.33338	0.968891	1
AlRepB-383	TcMar-Tc1	DNA	-0.19426	-0.194608	6.48146	0.723395	1
AlRepB-392	hAT-Charlie	DNA	0.251642	0.251689	9.48516	0.49445	1
AlRepB-420	Unknown	Unknown	0.00996375	0.00996472	10.6608	0.976342	1
AlRepB-429	hAT-Ac	DNA	0.0418791	0.041894	8.69604	0.911803	1
AlRepB-438	hAT-Charlie	DNA	-0.0264109	-0.0264159	9.68533	0.940489	1
AlRepB-44	TcMar-Tc1	DNA	-0.0923365	-0.0923462	11.5265	0.764078	1
AlRepB-473	hAT	DNA	0.0895955	0.0898359	6.16259	0.881171	1
AlRepB-517	TcMar-Tc1	DNA	-0.0790385	-0.0790515	10.453	0.816651	1
AlRepB-569	Unknown	Unknown	-0.123435	-0.123446	12.5478	0.688984	1
AlRepB-59	hAT-Tip100	DNA	-0.0393558	-0.0393877	7.40062	0.929611	1
AlRepB-60	DNA	DNA	0.0973052	0.0973277	9.4282	0.829698	1
AlRepB-65	Unknown	Unknown	-0.142905	-0.142932	9.73746	0.667556	1
AlRepB-727	hAT-Ac	DNA	0.247491	0.247543	9.7518	0.515205	1
AlRepB-731	TcMar-Tc2	DNA	0.042749	0.0427555	9.93851	0.910381	1
AlRepB-738	hAT-Ac	DNA	-0.073737	-0.0737505	9.62344	0.859225	1
AlRepB-767	Unknown	Unknown	0.0512648	0.051275	9.33908	0.906051	1
AlRepB-773	hAT-Charlie	DNA	0.315399	0.315669	7.44921	0.519728	1
AlRepB-784	hAT-Ac	DNA	0.116463	0.11648	10.0414	0.730258	1
AlRepB-923	hAT-Charlie	DNA	0.433296	0.433359	9.83921	0.276102	1
AlRepB-964	hAT-Tip100	DNA	0.083368	0.0833921	9.17291	0.808591	1
AlRepB-99	hAT	DNA	-0.247628	-0.247666	10.7559	0.441288	1
AlRepC-102	TcMar-Tc1	DNA	0.499465	0.500119	6.82238	0.414571	1
AlRepC-1020	Unknown	Unknown	-0.242493	-0.243432	6.29525	0.717394	1
AlRepC-1023	DNA	DNA	0.346701	0.34679	9.57209	0.372297	1
AlRepC-1033	PIF-Harbinger	DNA	-0.359575	-0.359932	7.47005	0.383232	1
AlRepC-1036	Unknown	Unknown	0.137743	0.137793	8.67152	0.79162	1
AlRepC-1083	hAT-Tip100	DNA	-0.258885	-0.259216	6.87498	0.626616	1
AlRepC-1084	Rex-Babar	LINE	-0.516622	-0.518044	6.2118	0.360078	1
AlRepC-1114	CMC-EnSpm	DNA	0.462116	0.462224	9.07278	0.286001	1
AlRepC-1119	hAT-Charlie	DNA	-0.00372155	-0.00372569	8.13059	0.994451	1
AlRepC-1121	Unknown	Unknown	0.200223	0.200498	7.93022	0.623348	1
AlRepC-1154	RTE-BovB	LINE	-0.0841989	-0.0842164	9.69669	0.82126	1
AlRepC-1169	CMC-EnSpm	DNA	-0.581965	-0.596321	5.13944	0.489366	1
AlRepC-1227	Unknown	Unknown	-0.0682731	-0.0682761	12.8435	0.820047	1
AlRepC-1255	PiggyBac	DNA	-0.1341	-0.134139	9.92827	0.725232	1
AlRepC-1270	Unknown	Unknown	-0.347953	-0.34834	7.27048	0.465056	1
AlRepC-128	hAT	DNA	-0.11568	-0.115697	11.4088	0.719408	1
AlRepC-1280	PIF-Harbinger	DNA	0.218973	0.219469	6.25484	0.717903	1
AlRepC-1282	hAT	DNA	-0.120131	-0.120453	5.83316	0.841058	1
AlRepC-1285	Unknown	Unknown	0.348191	0.348937	6.42103	0.553529	1
AlRepC-1286	hAT-Ac	DNA	-0.0551121	-0.0551885	7.06795	0.912948	1
AlRepC-1293	Unknown	Unknown	0.0227671	0.0229559	5.03157	0.978352	1
AlRepC-1298	Unknown	Unknown	0.368469	0.368614	9.89514	0.288984	1
AlRepC-13	Rex-Babar	LINE	-0.224432	-0.224483	10.1438	0.505158	1
AlRepC-1303	Unknown	Unknown	-0.0780732	-0.0782563	6.15346	0.889533	1
AlRepC-132	DNA	DNA	-0.607163	-0.609208	5.72049	0.366651	1
AlRepC-136	hAT-Ac	DNA	0.207374	0.20763	6.96071	0.756055	1
AlRepC-1388	Unknown	Unknown	0.161201	0.161251	9.16551	0.657713	1
AlRepC-1390	Unknown	Unknown	0.15676	0.156904	8.01279	0.703239	1
AlRepC-14	Unknown	Unknown	-0.277381	-0.277639	8.30277	0.489038	1
AlRepC-1412	Unknown	Unknown	0.19269	0.192716	11.6983	0.610477	1
AlRepC-143	Unknown	Unknown	-0.110914	-0.110934	11.2891	0.730611	1
AlRepC-1432	Unknown	Unknown	-0.00568348	-0.0057137	5.92301	0.994081	1
AlRepC-1433	hAT-Charlie	DNA	0.0737377	0.073816	7.07969	0.893639	1
AlRepC-144	Penelope	LINE	0.0365414	0.036579	7.87527	0.937212	1
AlRepC-1442	hAT-Ac	DNA	0.305535	0.306074	6.58509	0.548127	1
AlRepC-146	hAT-Ac	DNA	-0.222971	-0.223071	8.61205	0.60059	1
AlRepC-1543	IS3EU	DNA	-0.0090159	-0.00901987	10.7225	0.981318	1
AlRepC-1547	L2	LINE	0.832063	0.83282	7.52664	0.226846	1
AlRepC-1568	Unknown	Unknown	-0.35717	-0.357659	6.73496	0.479176	1
AlRepC-1574	Unknown	Unknown	-0.303653	-0.304004	7.81599	0.454249	1
AlRepC-1586	Unknown	Unknown	0.135952	0.135961	12.0352	0.678944	1
AlRepC-159	L2	LINE	-0.0318936	-0.0319081	9.80485	0.931851	1
AlRepC-160	hAT-Ac	DNA	-0.287705	-0.28799	9.42505	0.453908	1
AlRepC-162	MIR	SINE	0.132554	0.132578	10.3379	0.678693	1
AlRepC-1638	Unknown	Unknown	-0.386297	-0.387286	7.43859	0.481438	1
AlRepC-1646	hAT	DNA	0.103307	0.103751	5.42013	0.896105	1
AlRepC-169	Unknown	Unknown	-1.01065	-1.01619	4.80537	0.309897	1
AlRepC-17	Unknown	Unknown	0.0279053	0.0279061	13.1334	0.924027	1
AlRepC-1720	Unknown	Unknown	0.103679	0.104273	4.68498	0.899488	1
AlRepC-1745	CMC-EnSpm	DNA	0.0621494	0.0621635	9.00085	0.885585	1
AlRepC-18	hAT	DNA	-0.120249	-0.120307	9.87032	0.755498	1
AlRepC-1805	rRNA	rRNA	0.838127	0.8651	3.94037	0.491495	1
AlRepC-1837	L2	LINE	0.320227	0.320247	11.8853	0.341638	1
AlRepC-1878	DNA	DNA	0.028389	0.0283942	10.8255	0.932711	1
AlRepC-190	DNA	DNA	0.311418	0.312756	5.41425	0.709918	1
AlRepC-1946	Unknown	Unknown	-0.0680112	-0.068078	8.18338	0.886895	1
AlRepC-195	Unknown	Unknown	-0.566104	-0.566205	10.6415	0.332275	1
AlRepC-1957	RTE-BovB	LINE	0.125865	0.125913	9.09926	0.748991	1
AlRepC-20	hAT-Charlie	DNA	0.0310223	0.0310391	8.93988	0.932112	1
AlRepC-212	Unknown	Unknown	0.392962	0.393132	10.047	0.277114	1
AlRepC-2120	hAT-Ac	DNA	0.356157	0.356359	9.58881	0.342003	1
AlRepC-213	DNA	DNA	0.437656	0.437813	9.70232	0.332342	1
AlRepC-2145	hAT-Ac	DNA	0.0412806	0.0414016	5.72534	0.954668	1
AlRepC-2154	hAT-Ac	DNA	0.354892	0.355229	7.32249	0.474152	1
AlRepC-216	Unknown	Unknown	0.13476	0.134856	9.15305	0.760263	1
AlRepC-2165	Unknown	Unknown	0.399146	0.399177	11.7152	0.214125	1
AlRepC-22	Unknown	Unknown	0.099193	0.0992484	8.6497	0.799214	1
AlRepC-223	ERV1	LTR	-0.0855745	-0.0856119	8.31778	0.844922	1
AlRepC-2318	Unknown	Unknown	0.164524	0.164593	8.27205	0.735276	1
AlRepC-234	hAT	DNA	0.454691	0.455524	6.45733	0.392434	1
AlRepC-235	Unknown	Unknown	0.183109	0.183189	9.16535	0.621248	1
AlRepC-2352	Unknown	Unknown	0.585213	0.586856	5.5144	0.456474	1
AlRepC-2359	Unknown	Unknown	-0.310661	-0.310768	9.80503	0.469529	1
AlRepC-238	Rex-Babar	LINE	0.0930019	0.0940009	4.12847	0.933268	1
AlRepC-239	Unknown	Unknown	0.157061	0.157063	13.8402	0.724051	1
AlRepC-247	Unknown	Unknown	-0.0267672	-0.0267698	11.9227	0.931406	1
AlRepC-258	Unknown	Unknown	0.163558	0.163633	8.52248	0.680564	1
AlRepC-2606	Unknown	Unknown	0.559829	0.560575	6.89702	0.276062	1
AlRepC-269	TcMar-Tc1	DNA	0.184426	0.184574	7.99594	0.65169	1
AlRepC-27	L2	LINE	-0.64081	-0.643329	7.84082	0.294891	1
AlRepC-270	Unknown	Unknown	-0.120643	-0.120823	6.54993	0.822914	1
AlRepC-2704	hAT-Tip100	DNA	0.164755	0.165135	6.16923	0.767478	1
AlRepC-2717	Rex-Babar	LINE	-0.169241	-0.169587	7.07032	0.749562	1
AlRepC-281	TcMar-Tc1	DNA	-0.0686274	-0.068681	9.36053	0.859551	1
AlRepC-282	Unknown	Unknown	0.176353	0.176368	11.0765	0.663904	1
AlRepC-286	hAT-Ac	DNA	0.454434	0.455489	6.29686	0.478305	1
AlRepC-30	hAT	DNA	-0.0695462	-0.069704	5.67438	0.933166	1
AlRepC-300	Unknown	Unknown	0.2755	0.276501	5.30888	0.760372	1
AlRepC-3064	Unknown	Unknown	0.428853	0.429649	6.49116	0.420248	1
AlRepC-308	TcMar-Tc1	DNA	0.0659627	0.0664099	4.38832	0.936477	1
AlRepC-312	TcMar-Tc1	DNA	-0.0535653	-0.0535707	11.6699	0.877693	1
AlRepC-32	hAT	DNA	-0.316582	-0.316655	10.3539	0.59937	1
AlRepC-3203	Unknown	Unknown	0.159571	0.159627	9.54998	0.665747	1
AlRepC-326	Unknown	Unknown	-0.188579	-0.188833	6.8065	0.781607	1
AlRepC-328	Unknown	Unknown	-0.306896	-0.306968	10.4839	0.385285	1
AlRepC-335	Unknown	Unknown	0.159083	0.159202	8.35804	0.662088	1
AlRepC-345	Gypsy	LTR	0.0150106	0.0150139	9.00042	0.978451	1
AlRepC-346	L2	LINE	0.434707	0.434796	9.44023	0.305821	1
AlRepC-349	Unknown	Unknown	-0.0471329	-0.0471342	12.0643	0.941213	1
AlRepC-358	Unknown	Unknown	-0.367609	-0.368464	6.27771	0.540138	1
AlRepC-365	Unknown	Unknown	0.168196	0.168218	10.5094	0.704398	1
AlRepC-373	Unknown	Unknown	0.137422	0.137426	13.1904	0.64369	1
AlRepC-374	Unknown	Unknown	-0.0104431	-0.0104497	11.539	0.988906	1
AlRepC-394	hAT-Tol2	DNA	0.051951	0.0519542	11.9139	0.884992	1
AlRepC-4030	DNA	DNA	0.175577	0.175624	9.31748	0.609431	1
AlRepC-43	Unknown	Unknown	0.323488	0.324134	6.3836	0.609	1
AlRepC-436	hAT-Ac	DNA	0.300986	0.30103	9.64824	0.499149	1
AlRepC-4392	Rex-Babar	LINE	-0.155791	-0.156136	6.62582	0.803039	1
AlRepC-457	hAT-Charlie	DNA	-0.265571	-0.265606	12.1514	0.428046	1
AlRepC-469	L2	LINE	-0.12768	-0.127698	10.6782	0.705145	1
AlRepC-4748	CMC-EnSpm	DNA	-0.228945	-0.229902	5.32917	0.765221	1
AlRepC-488	DNA	DNA	0.114418	0.11447	8.67707	0.752293	1
AlRepC-501	Rex-Babar	LINE	-0.0365994	-0.0366369	8.67458	0.932551	1
AlRepC-505	hAT-Charlie	DNA	-0.542831	-0.543607	6.67731	0.34364	1
AlRepC-508	L2	LINE	-0.161817	-0.161838	10.5572	0.637887	1
AlRepC-521	Retroposon	Retroposon	0.257995	0.258028	10.767	0.569906	1
AlRepC-53	Unknown	Unknown	0.75102	0.753982	5.3356	0.31699	1
AlRepC-532	hAT	DNA	-0.535776	-0.536763	6.39856	0.286948	1
AlRepC-536	hAT-Ac	DNA	0.306417	0.307358	5.73645	0.626841	1
AlRepC-538	TcMar-Tigger	DNA	-0.1367	-0.136952	6.84344	0.778489	1
AlRepC-539	Unknown	Unknown	-0.166429	-0.166825	6.3534	0.814445	1
AlRepC-549	Unknown	Unknown	0.285446	0.285519	9.19124	0.523259	1
AlRepC-550	Unknown	Unknown	1.78239	1.81259	3.91429	0.204917	1
AlRepC-555	PiggyBac	DNA	-0.166738	-0.167003	6.97086	0.704119	1
AlRepC-558	TcMar-Fot1	DNA	0.239631	0.240082	7.43028	0.590442	1
AlRepC-560	Unknown	Unknown	-0.0773803	-0.077382	12.75	0.849542	1
AlRepC-563	TcMar-Tc1	DNA	0.0508897	0.0509204	8.51786	0.913545	1
AlRepC-57	DNA	DNA	0.358904	0.359065	9.04304	0.341803	1
AlRepC-572	Unknown	Unknown	-0.42221	-0.422241	11.1763	0.376043	1
AlRepC-580	Unknown	Unknown	0.241971	0.241994	11.774	0.481346	1
AlRepC-589	Unknown	Unknown	-0.539716	-0.540047	11.3662	0.209805	1
AlRepC-595	P	DNA	-0.0747901	-0.0748077	9.29156	0.869236	1
AlRepC-61	Unknown	Unknown	0.0121275	0.0121294	10.6731	0.975647	1
AlRepC-625	TcMar-Tc2	DNA	-0.242734	-0.243143	6.629	0.60215	1
AlRepC-631	TcMar-Tc1	DNA	0.209551	0.209571	11.9121	0.502132	1
AlRepC-637	LINE	LINE	-0.19176	-0.191879	8.26114	0.681102	1
AlRepC-64	Unknown	Unknown	0.192313	0.192358	9.78164	0.593042	1
AlRepC-643	Unknown	Unknown	0.295918	0.295995	9.56861	0.438858	1
AlRepC-65	PIF-Harbinger	DNA	-0.0207449	-0.0207477	5.14155	0.980637	1
AlRepC-659	Unknown	Unknown	-0.30289	-0.303216	7.45248	0.493345	1
AlRepC-66	PIF-Harbinger	DNA	-0.25063	-0.250999	6.85894	0.585693	1
AlRepC-670	Unknown	Unknown	0.275035	0.275112	10.2519	0.434318	1
AlRepC-687	Unknown	Unknown	0.285931	0.285963	11.0557	0.43894	1
AlRepC-690	Unknown	Unknown	-0.0668432	-0.0668763	7.99739	0.884764	1
AlRepC-692	Unknown	Unknown	-0.0830917	-0.0830979	11.8964	0.801807	1
AlRepC-693	Unknown	Unknown	0.0617033	0.0617116	10.8683	0.862288	1
AlRepC-696	CMC-EnSpm	DNA	0.570741	0.571315	7.66572	0.291573	1
AlRepC-702	Unknown	Unknown	0.717498	0.71909	6.19733	0.207747	1
AlRepC-73	Unknown	Unknown	0.21902	0.219057	9.79321	0.618671	1
AlRepC-733	hAT-Ac	DNA	-0.520212	-0.520618	8.03061	0.254011	1
AlRepC-735	Unknown	Unknown	0.0735682	0.0735824	10.8598	0.827998	1
AlRepC-736	PIF-Harbinger	DNA	0.0418328	0.0418391	10.4976	0.899453	1
AlRepC-753	Rex-Babar	LINE	-0.0974192	-0.0975047	7.49405	0.846909	1
AlRepC-754	DNA	DNA	0.327911	0.327961	9.94728	0.331768	1
AlRepC-767	Unknown	Unknown	0.29883	0.29898	8.22608	0.465951	1
AlRepC-769	Unknown	Unknown	-0.335749	-0.336223	7.12985	0.519317	1
AlRepC-800	LTR	LTR	0.341023	0.341724	6.61067	0.513745	1
AlRepC-847	Unknown	Unknown	-0.0696486	-0.0696818	8.76579	0.870523	1
AlRepC-849	Rex-Babar	LINE	0.343994	0.344271	7.54301	0.455914	1
AlRepC-87	Unknown	Unknown	0.025532	0.0255389	9.2808	0.939888	1
AlRepC-891	L1	LINE	-0.180168	-0.180699	6.20341	0.755695	1
AlRepC-895	TcMar-Tc1	DNA	0.0562837	0.0562893	10.1496	0.901258	1
AlRepC-905	Unknown	Unknown	-0.0158388	-0.0158398	12.4392	0.957312	1
AlRepC-91	TcMar-Tc2	DNA	0.0960242	0.0962285	6.07442	0.863032	1
AlRepC-911	Rex-Babar	LINE	-0.361692	-0.362076	7.22702	0.534164	1
AlRepC-927	hAT-Ac	DNA	0.200329	0.200452	8.00104	0.643212	1
AlRepC-942	Unknown	Unknown	-0.0384893	-0.0384928	11.4551	0.910337	1
AlRepC-946	TcMar-Tc1	DNA	-0.00742727	-0.00742854	10.7771	0.982053	1
AlRepC-959	hAT-Ac	DNA	0.275973	0.276208	7.36936	0.619821	1
AlRepC-962	Unknown	Unknown	0.207705	0.207735	10.8733	0.543606	1
AlRepC-968	Unknown	Unknown	-0.0904466	-0.0904714	10.03	0.784981	1
AlRepC-969	Unknown	Unknown	0.12357	0.123618	9.84917	0.751037	1
AlRepC-98	Unknown	Unknown	-0.376931	-0.377095	8.99765	0.284084	1
AlRepC-987	TcMar-Tc1	DNA	0.0475266	0.0475436	8.79486	0.898525	1
AlRepD-100	Unknown	Unknown	0.540178	0.541668	5.88892	0.40819	1
AlRepD-1005	Unknown	Unknown	-0.505953	-0.506411	7.48195	0.394053	1
AlRepD-1008	Unknown	Unknown	0.237494	0.239795	7.43655	0.747751	1
AlRepD-1010	Unknown	Unknown	0.896392	0.900115	6.4784	0.242464	1
AlRepD-1014	CMC-EnSpm	DNA	-0.183892	-0.184312	7.57209	0.837688	1
AlRepD-1017	DNA	DNA	0.227024	0.227594	6.49515	0.764245	1
AlRepD-1020	L1	LINE	-0.187685	-0.189376	4.30462	0.869851	1
AlRepD-1024	Unknown	Unknown	0.159462	0.159547	8.22272	0.76508	1
AlRepD-1030	hAT-Ac	DNA	0.68613	0.689113	5.67876	0.375872	1
AlRepD-1040	RTE-BovB	LINE	-0.0331843	-0.0331938	9.08461	0.928049	1
AlRepD-1055	ERV1	LTR	-0.0636248	-0.0636501	8.84015	0.917524	1
AlRepD-1079	TcMar-Tc1	DNA	0.186775	0.186795	11.354	0.615124	1
AlRepD-1103	Unknown	Unknown	0.0108169	0.0108269	6.27864	0.986039	1
AlRepD-111	Unknown	Unknown	0.0378236	0.0378272	11.9169	0.901862	1
AlRepD-1117	L2	LINE	-0.00610194	-0.0061075	7.49142	0.99107	1
AlRepD-1119	L2	LINE	0.443363	0.443665	7.93615	0.41191	1
AlRepD-1120	Unknown	Unknown	0.1742	0.175297	5.69668	0.846272	1
AlRepD-1127	L1	LINE	0.245205	0.246426	5.3748	0.779967	1
AlRepD-114	Unknown	Unknown	-0.0938675	-0.0939241	9.02231	0.803515	1
AlRepD-1147	Unknown	Unknown	0.154337	0.154817	6.0188	0.834276	1
AlRepD-1165	L2	LINE	0.10116	0.101161	13.9169	0.744297	1
AlRepD-11767	PiggyBac	DNA	0.474967	0.477057	7.21864	0.477147	1
AlRepD-1177	Unknown	Unknown	-0.129368	-0.129436	10.7769	0.738418	1
AlRepD-1181	L2	LINE	0.0591553	0.0592483	7.04324	0.911825	1
AlRepD-11942	Unknown	Unknown	-0.130184	-0.130466	6.92707	0.802624	1
AlRepD-1203	Unknown	Unknown	-0.145548	-0.145712	9.32713	0.74122	1
AlRepD-1209	L2	LINE	0.630104	0.630516	7.98197	0.405679	1
AlRepD-12181	Unknown	Unknown	-0.454793	-0.455764	6.53171	0.479513	1
AlRepD-1221	Rex-Babar	LINE	-0.00961822	-0.00962791	7.79936	0.982741	1
AlRepD-12292	Unknown	Unknown	0.341972	0.343835	4.98526	0.693786	1
AlRepD-1230	Unknown	Unknown	-0.714294	-0.714889	8.05722	0.300609	1
AlRepD-1235	Unknown	Unknown	-0.277575	-0.277629	11.1401	0.451541	1
AlRepD-1254	hAT-Ac	DNA	0.413222	0.413621	8.50709	0.36234	1
AlRepD-1256	DNA	DNA	0.192296	0.19307	6.05644	0.743067	1
AlRepD-1257	L2	LINE	0.360113	0.360749	6.72163	0.563927	1
AlRepD-1273	PIF-Harbinger	DNA	0.307808	0.307904	10.8106	0.349553	1
AlRepD-1284	ERV1	LTR	0.48242	0.482812	7.85761	0.417794	1
AlRepD-1286	TcMar-Tigger	DNA	-0.24641	-0.247497	5.2445	0.779459	1
AlRepD-1291	Unknown	Unknown	-0.125558	-0.12591	8.3045	0.774599	1
AlRepD-1296	Unknown	Unknown	-0.775977	-0.779956	5.23606	0.356212	1
AlRepD-1307	Pao	LTR	0.797044	0.803605	5.57126	0.305303	1
AlRepD-1318	TcMar-Tc1	DNA	-0.032407	-0.0324613	6.36978	0.95092	1
AlRepD-132	Unknown	Unknown	0.0862007	0.0862726	8.21724	0.872437	1
AlRepD-1337	Unknown	Unknown	-0.0126842	-0.0126961	9.15586	0.97427	1
AlRepD-1339	TcMar-Tc2	DNA	-0.0162088	-0.0162427	6.30516	0.975778	1
AlRepD-134	Unknown	Unknown	-0.150006	-0.150016	13.8318	0.723157	1
AlRepD-1346	L2	LINE	-0.218944	-0.219093	8.2349	0.622354	1
AlRepD-1353	PiggyBac	DNA	-0.573048	-0.573917	7.19282	0.286737	1
AlRepD-1356	MIR	SINE	0.404507	0.404776	8.48628	0.305743	1
AlRepD-1371	Unknown	Unknown	-0.446688	-0.447552	6.51185	0.464634	1
[truncated: 662 more rows]

## Sheet: Female Gonad
Element	Family	Class	logFC.-1	unshrunk.logFC.1	logCPM.0	PValue.0	FDR.-1
[truncated: 2,645 more rows]
