# Supplementary material for: Structural and Functional Analysis of Transposable Elements Focusing on B Chromosomes of the Cichlid Fish <em>Astatotilapia latifasciata</em>
Source: Preprints.org preprint supplement (doi:10.20944/preprints201803.0145.v1), 2018-03-19
Supplement: Supplementary file 2 [file supplementary]

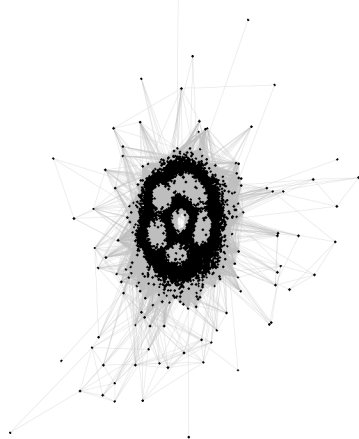

**CL1**

Number of reads: 13288  
Number of pairs: 24887532  
Density: 0.2819  
Diameter: NA  
Mean edge weight: 125.98  
Max. degree: 5056

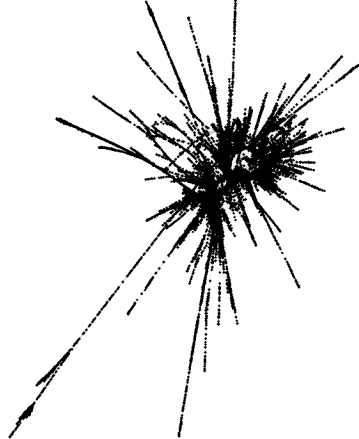

**CL2**

Number of reads: 43143  
Number of pairs: 1833126  
Density: 0.00197  
Diameter: NA  
Mean edge weight: 134.03  
Max. degree: 750

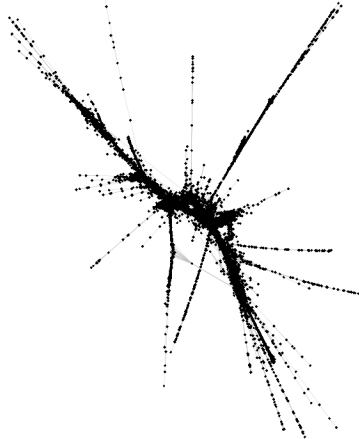

**CL3**

Number of reads: 40049  
Number of pairs: 17095032  
Density: 0.02132  
Diameter: NA  
Mean edge weight: 118.99  
Max. degree: 2608

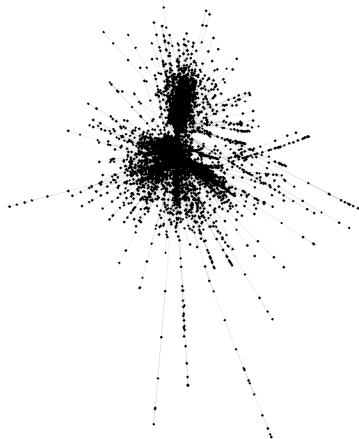

**CL4**

Number of reads: 38815  
Number of pairs: 24980157  
Density: 0.03316  
Diameter: NA  
Mean edge weight: 114.21  
Max. degree: 5347

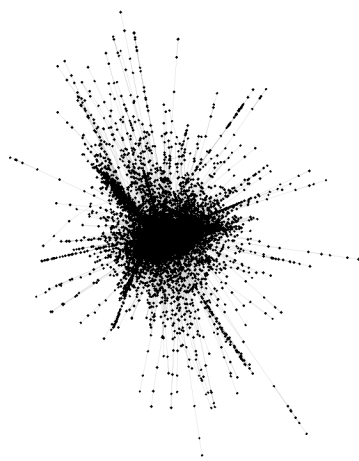

**CL5**

Number of reads: 34042  
Number of pairs: 24963817  
Density: 0.04308  
Diameter: NA  
Mean edge weight: 118.15  
Max. degree: 6939

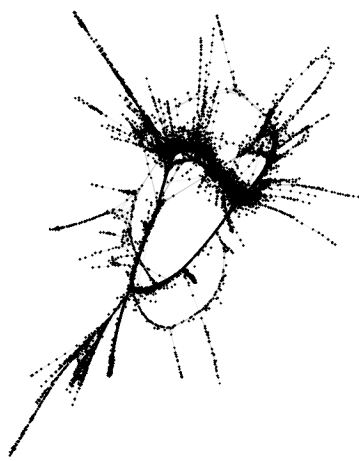

**CL6**

Number of reads: 38149  
Number of pairs: 6519854  
Density: 0.00896  
Diameter: NA  
Mean edge weight: 136.9  
Max. degree: 1349

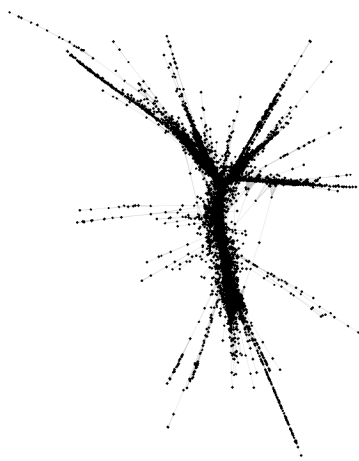

**CL7**

Number of reads: 34628  
Number of pairs: 17040146  
Density: 0.02842  
Diameter: NA  
Mean edge weight: 118.27  
Max. degree: 3382

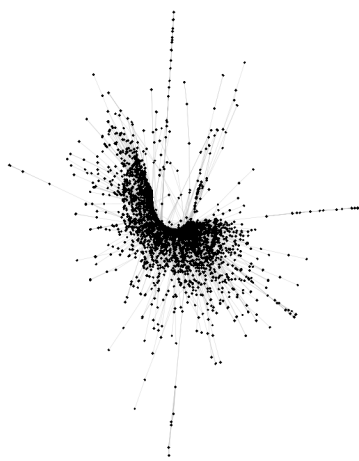

**CL8**

Number of reads: 27553  
Number of pairs: 24922448  
Density: 0.06566  
Diameter: NA  
Mean edge weight: 134.44  
Max. degree: 2955

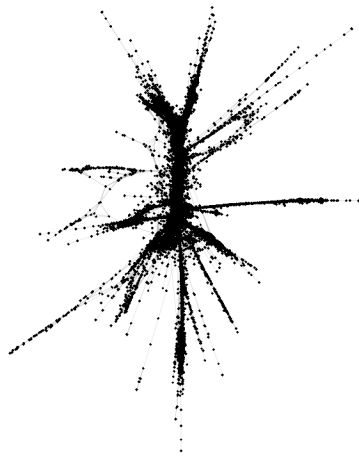

**CL9**

Number of reads: 33471  
Number of pairs: 8469047  
Density: 0.01512  
Diameter: NA  
Mean edge weight: 121.25  
Max. degree: 2160

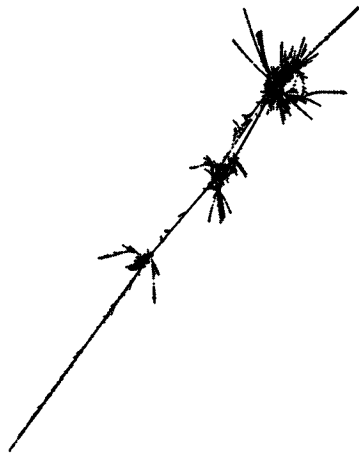

**CL10**

Number of reads: 33129  
Number of pairs: 2678185  
Density: 0.004881  
Diameter: NA  
Mean edge weight: 138.69  
Max. degree: 711

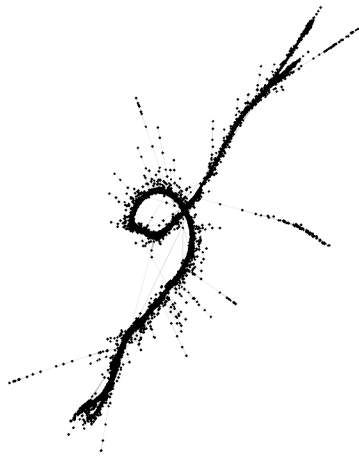

**CL11**

Number of reads: 31882  
Number of pairs: 6992372  
Density: 0.01376  
Diameter: NA  
Mean edge weight: 132.01  
Max. degree: 923

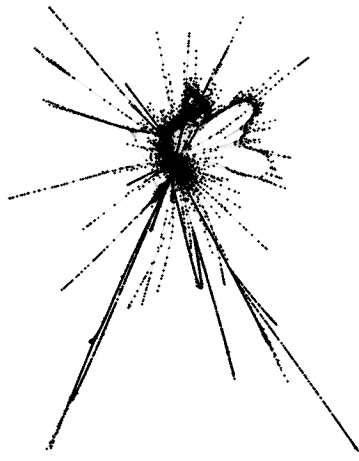

**CL12**

Number of reads: 31193  
Number of pairs: 3941314  
Density: 0.008102  
Diameter: NA  
Mean edge weight: 109.16  
Max. degree: 2562

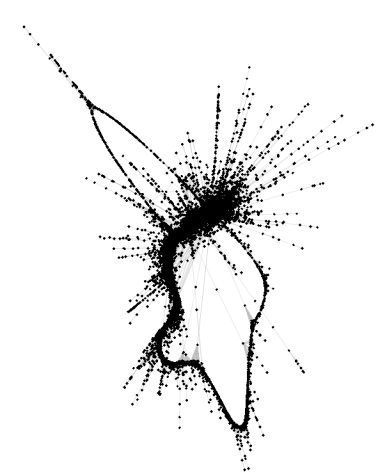

**CL13**

Number of reads: 30476  
 Number of pairs: 15560172  
 Density: 0.03351  
 Diameter: NA  
 Mean edge weight: 120.62  
 Max. degree: 4244

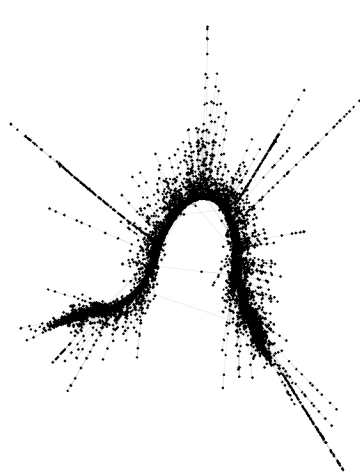

**CL14**

Number of reads: 30465  
 Number of pairs: 11960413  
 Density: 0.02577  
 Diameter: NA  
 Mean edge weight: 135.77  
 Max. degree: 1569

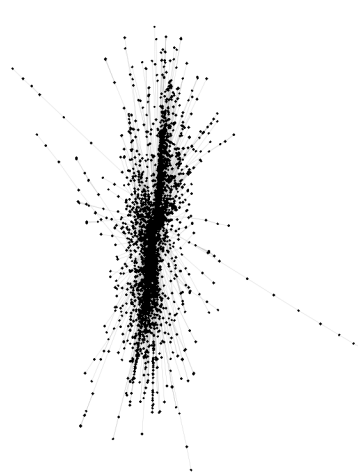

**CL15**

Number of reads: 23282  
 Number of pairs: 25124565  
 Density: 0.09271  
 Diameter: NA  
 Mean edge weight: 133.33  
 Max. degree: 3677

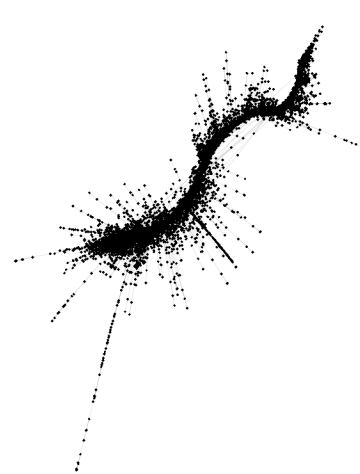

**CL16**

Number of reads: 28696  
 Number of pairs: 11355549  
 Density: 0.02758  
 Diameter: NA  
 Mean edge weight: 130.97  
 Max. degree: 1770

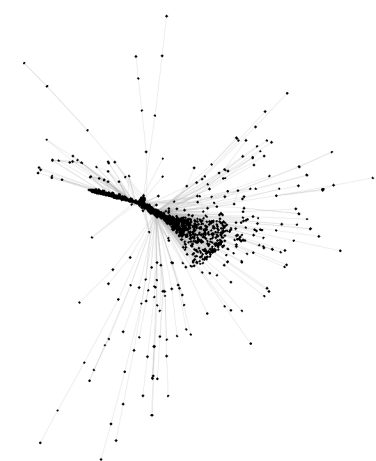

**CL17**

Number of reads: 16532  
 Number of pairs: 25182157  
 Density: 0.1843  
 Diameter: NA  
 Mean edge weight: 140.71  
 Max. degree: 4994

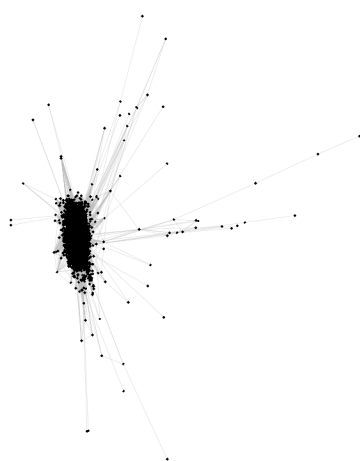

**CL18**

Number of reads: 24234  
 Number of pairs: 24858135  
 Density: 0.08466  
 Diameter: NA  
 Mean edge weight: 107.29  
 Max. degree: 18895

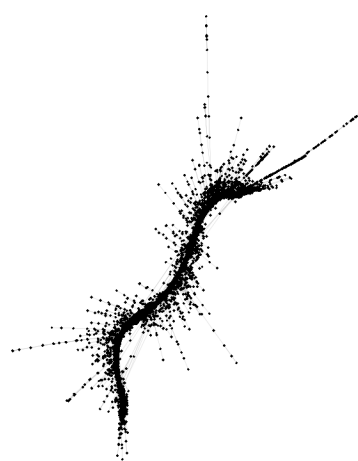

**CL19**

Number of reads: 26828  
 Number of pairs: 14572225  
 Density: 0.04049  
 Diameter: NA  
 Mean edge weight: 136.96  
 Max. degree: 2056

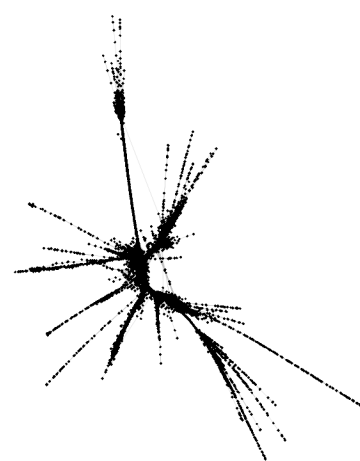

**CL20**

Number of reads: 26507  
 Number of pairs: 4542239  
 Density: 0.01293  
 Diameter: NA  
 Mean edge weight: 116.62  
 Max. degree: 1312

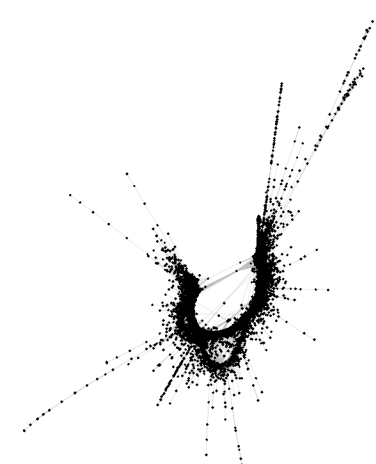

**CL21**

Number of reads: 25932  
 Number of pairs: 11941912  
 Density: 0.03552  
 Diameter: NA  
 Mean edge weight: 119.49  
 Max. degree: 2134

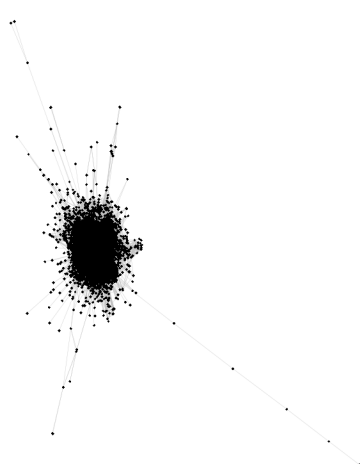

**CL22**

Number of reads: 25856  
 Number of pairs: 21767062  
 Density: 0.06512  
 Diameter: NA  
 Mean edge weight: 123.91  
 Max. degree: 4587

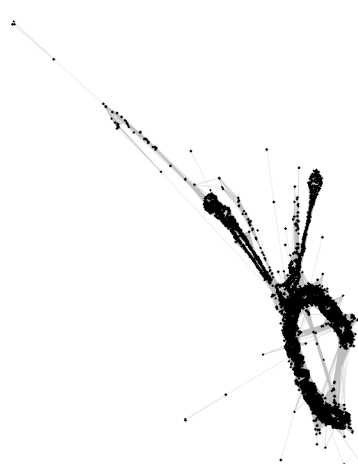

**CL23**

Number of reads: 21763  
 Number of pairs: 24985346  
 Density: 0.1055  
 Diameter: NA  
 Mean edge weight: 129.75  
 Max. degree: 3658

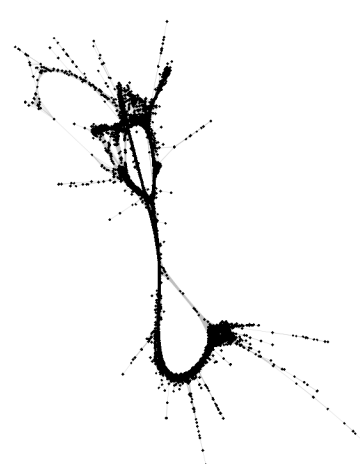

**CL24**

Number of reads: 25041  
 Number of pairs: 6852628  
 Density: 0.02186  
 Diameter: NA  
 Mean edge weight: 125.1  
 Max. degree: 2330

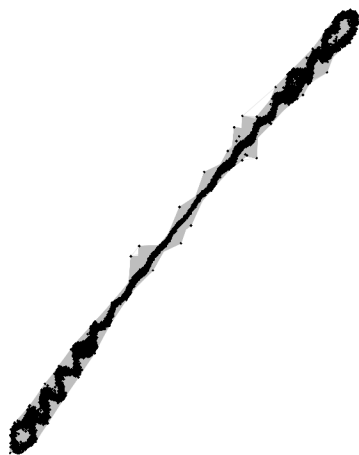

**CL25**

Number of reads: 20053  
 Number of pairs: 24977636  
 Density: 0.1242  
 Diameter: NA  
 Mean edge weight: 154.71  
 Max. degree: 2835

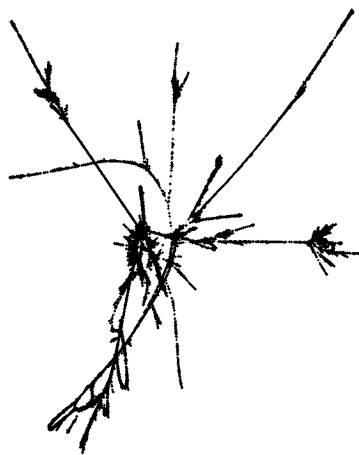

**CL26**

Number of reads: 23843  
 Number of pairs: 909631  
 Density: 0.0032  
 Diameter: NA  
 Mean edge weight: 135.49  
 Max. degree: 463

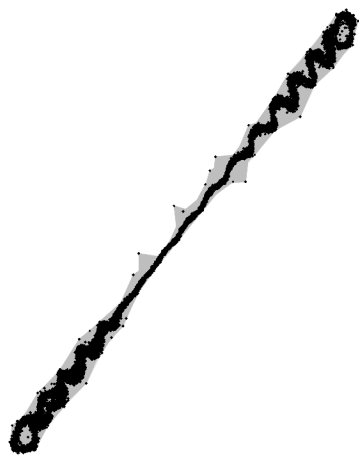

**CL27**

Number of reads: 19363  
 Number of pairs: 25026324  
 Density: 0.1335  
 Diameter: NA  
 Mean edge weight: 154.59  
 Max. degree: 3012

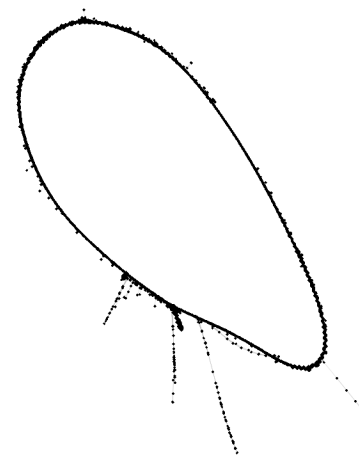

**CL28**

Number of reads: 23748  
 Number of pairs: 4003990  
 Density: 0.0142  
 Diameter: NA  
 Mean edge weight: 151.75  
 Max. degree: 613

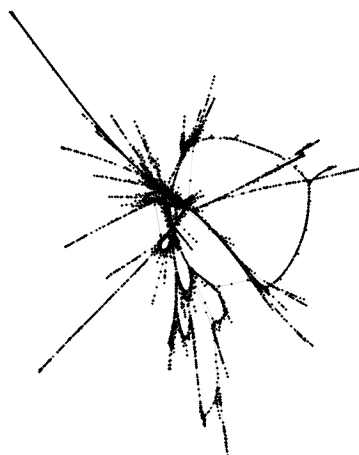

**CL29**

Number of reads: 23385  
 Number of pairs: 2348269  
 Density: 0.008589  
 Diameter: NA  
 Mean edge weight: 122.82  
 Max. degree: 696

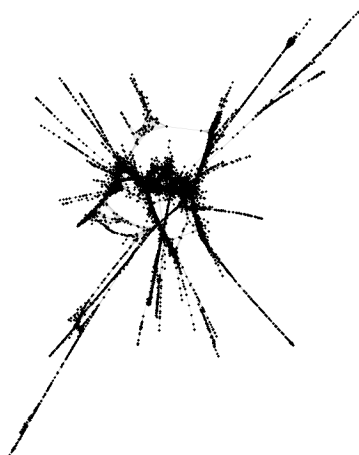

**CL30**

Number of reads: 23215  
 Number of pairs: 1547039  
 Density: 0.005741  
 Diameter: NA  
 Mean edge weight: 111.44  
 Max. degree: 754

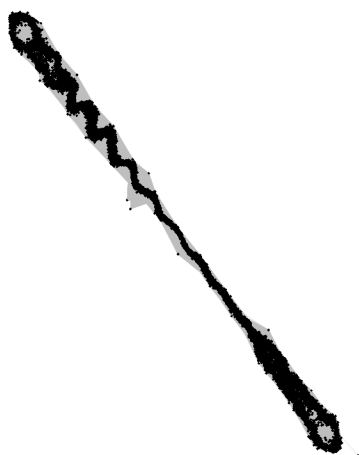

**CL31**

Number of reads: 18362  
 Number of pairs: 24956416  
 Density: 0.148  
 Diameter: NA  
 Mean edge weight: 154.18  
 Max. degree: 3130

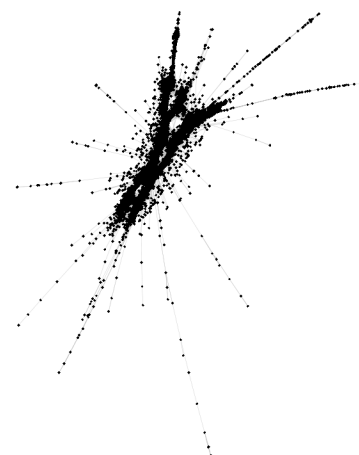

**CL32**

Number of reads: 23057  
 Number of pairs: 10526129  
 Density: 0.0396  
 Diameter: NA  
 Mean edge weight: 129.51  
 Max. degree: 2357

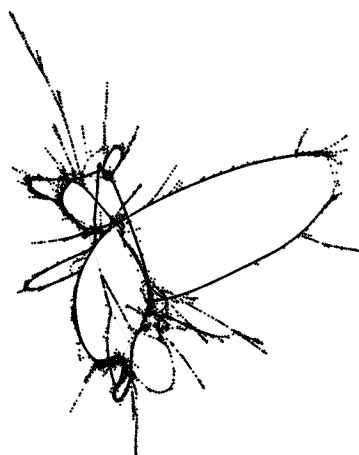

**CL33**

Number of reads: 22397  
 Number of pairs: 930694  
 Density: 0.003711  
 Diameter: NA  
 Mean edge weight: 138.93  
 Max. degree: 340

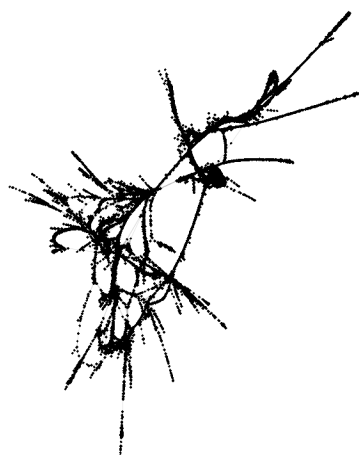

**CL34**

Number of reads: 22187  
 Number of pairs: 650652  
 Density: 0.002644  
 Diameter: NA  
 Mean edge weight: 128.66  
 Max. degree: 241

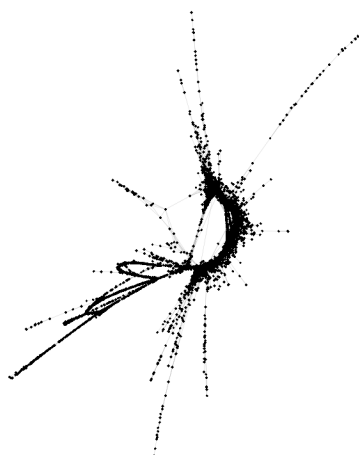

**CL35**

Number of reads: 21176  
 Number of pairs: 7047081  
 Density: 0.03143  
 Diameter: NA  
 Mean edge weight: 117.44  
 Max. degree: 1700

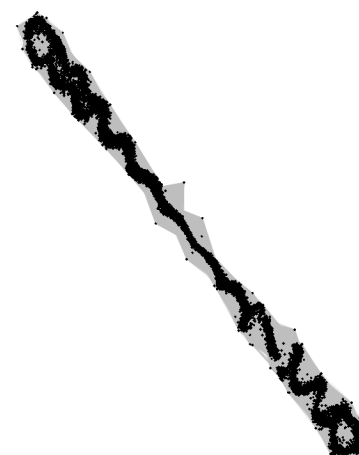

**CL36**

Number of reads: 17057  
 Number of pairs: 25010146  
 Density: 0.1719  
 Diameter: NA  
 Mean edge weight: 155.14  
 Max. degree: 3332

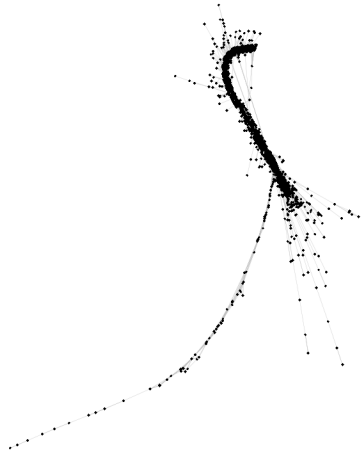

**CL37**

Number of reads: 20574  
Number of pairs: 18469459  
Density: 0.08727  
Diameter: NA  
Mean edge weight: 143.3  
Max. degree: 2291

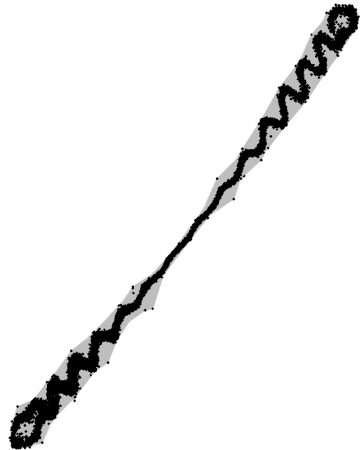

**CL38**

Number of reads: 18634  
Number of pairs: 25007179  
Density: 0.144  
Diameter: NA  
Mean edge weight: 154.76  
Max. degree: 3061

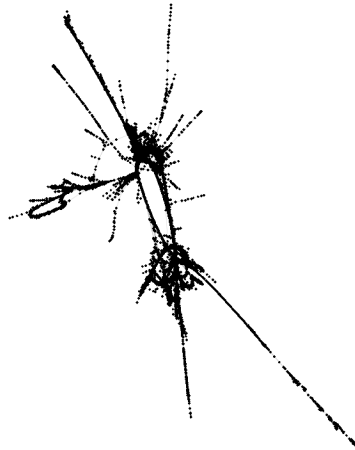

**CL39**

Number of reads: 20237  
Number of pairs: 1480003  
Density: 0.007228  
Diameter: NA  
Mean edge weight: 125.63  
Max. degree: 557

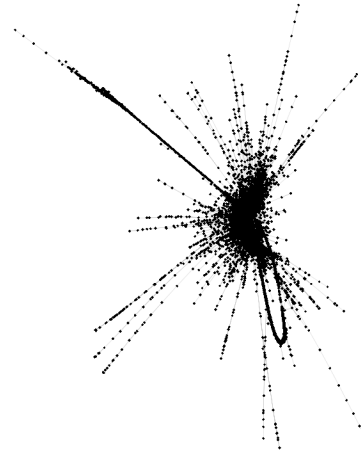

**CL40**

Number of reads: 20227  
Number of pairs: 6156618  
Density: 0.0301  
Diameter: NA  
Mean edge weight: 121.41  
Max. degree: 2489

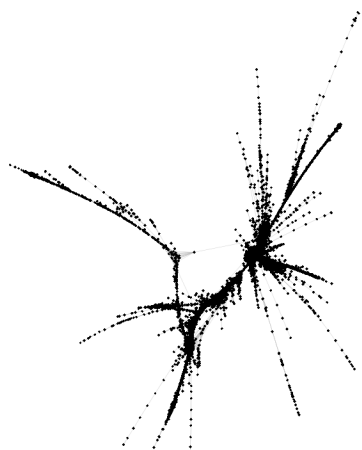

**CL41**

Number of reads: 20192  
Number of pairs: 4261449  
Density: 0.0209  
Diameter: NA  
Mean edge weight: 121.43  
Max. degree: 1709

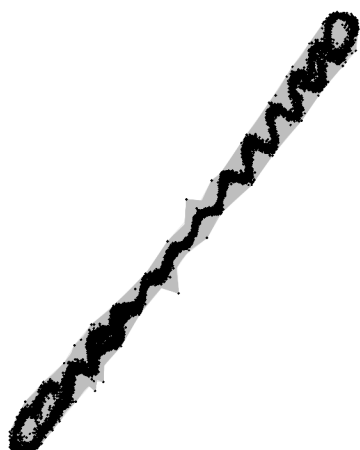

**CL42**

Number of reads: 17435  
Number of pairs: 25004487  
Density: 0.1645  
Diameter: NA  
Mean edge weight: 154.76  
Max. degree: 3206

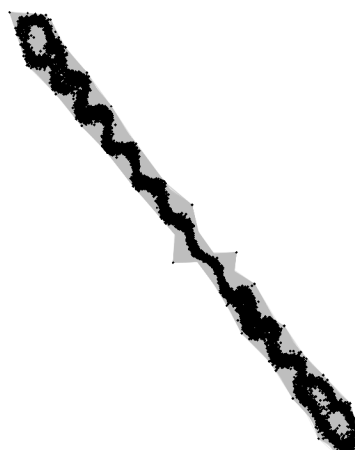

**CL43**

Number of reads: 16915  
Number of pairs: 25003172  
Density: 0.1748  
Diameter: NA  
Mean edge weight: 154.93  
Max. degree: 3317

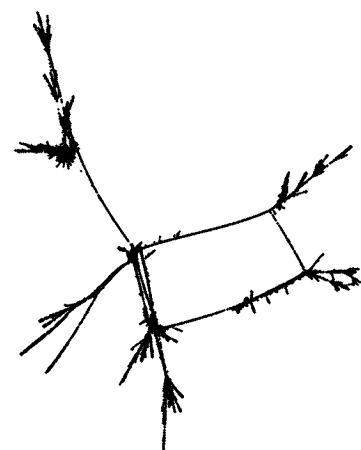

**CL44**

Number of reads: 19790  
Number of pairs: 364658  
Density: 0.001862  
Diameter: NA  
Mean edge weight: 136.93  
Max. degree: 245

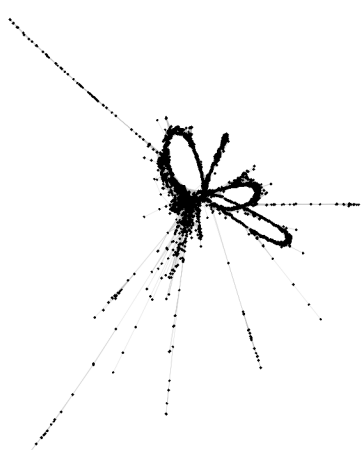

**CL45**

Number of reads: 19670  
Number of pairs: 7461731  
Density: 0.03857  
Diameter: NA  
Mean edge weight: 141.4  
Max. degree: 2278

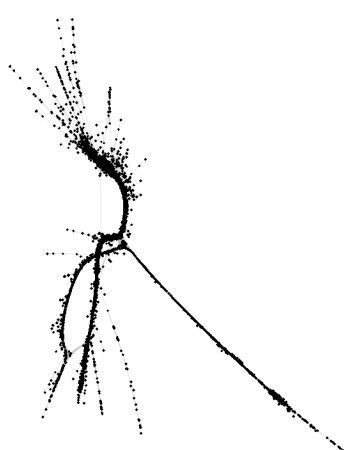

**CL46**

Number of reads: 19670  
Number of pairs: 6322189  
Density: 0.03268  
Diameter: NA  
Mean edge weight: 133.95  
Max. degree: 1962

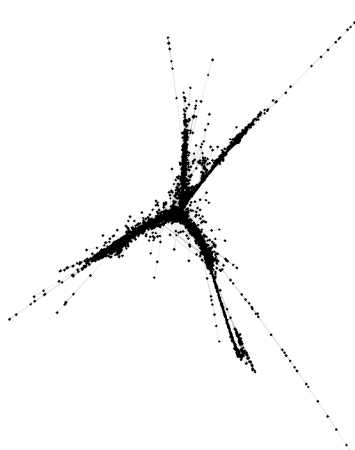

**CL47**

Number of reads: 19619  
Number of pairs: 8695928  
Density: 0.04519  
Diameter: NA  
Mean edge weight: 122.93  
Max. degree: 1907

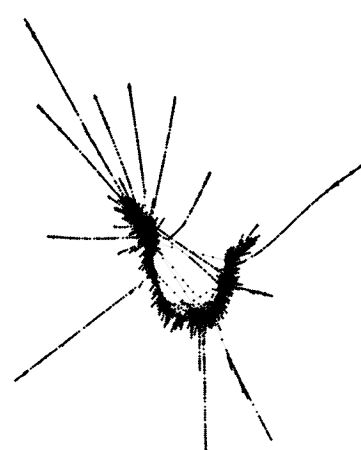

**CL48**

Number of reads: 19581  
Number of pairs: 96522  
Density: 0.0005035  
Diameter: NA  
Mean edge weight: 104.11  
Max. degree: 400

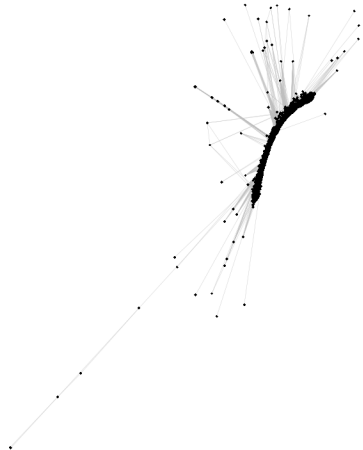

**CL49**

Number of reads: 16791  
 Number of pairs: 24999977  
 Density: 0.1774  
 Diameter: NA  
 Mean edge weight: 148.69  
 Max. degree: 3520

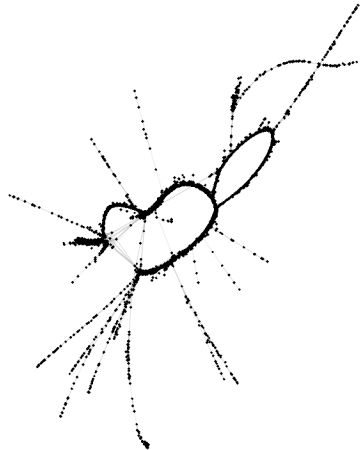

**CL50**

Number of reads: 18972  
 Number of pairs: 3598491  
 Density: 0.02  
 Diameter: NA  
 Mean edge weight: 134.35  
 Max. degree: 812

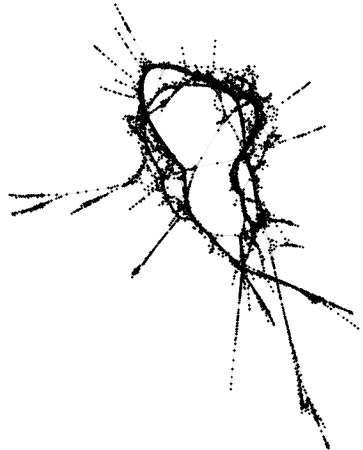

**CL51**

Number of reads: 18537  
 Number of pairs: 704072  
 Density: 0.004098  
 Diameter: NA  
 Mean edge weight: 123.54  
 Max. degree: 259

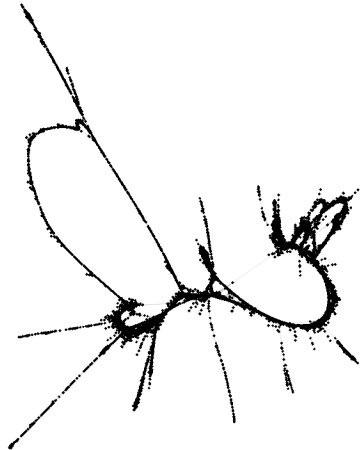

**CL52**

Number of reads: 18238  
 Number of pairs: 728825  
 Density: 0.004383  
 Diameter: NA  
 Mean edge weight: 124.74  
 Max. degree: 288

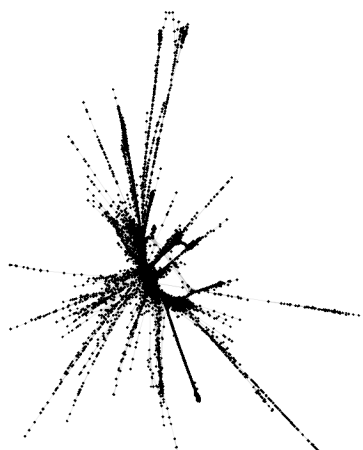

**CL53**

Number of reads: 18203  
 Number of pairs: 2714826  
 Density: 0.01639  
 Diameter: NA  
 Mean edge weight: 128.25  
 Max. degree: 1629

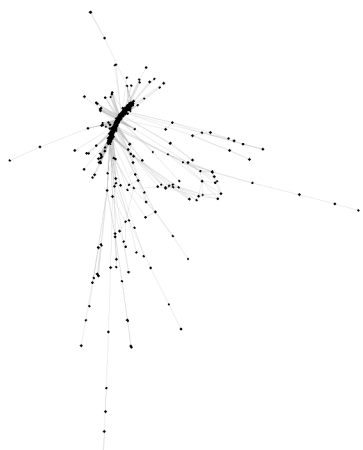

**CL54**

Number of reads: 16886  
 Number of pairs: 25014458  
 Density: 0.1755  
 Diameter: NA  
 Mean edge weight: 149.04  
 Max. degree: 3487

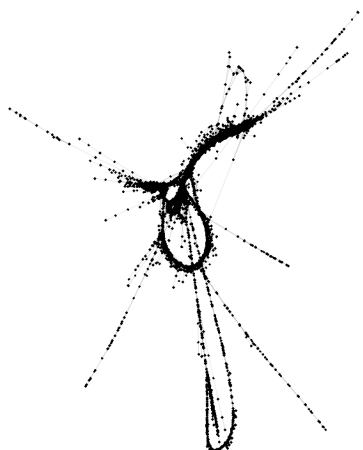

**CL55**

Number of reads: 18033  
 Number of pairs: 6454372  
 Density: 0.0397  
 Diameter: NA  
 Mean edge weight: 128.4  
 Max. degree: 1551

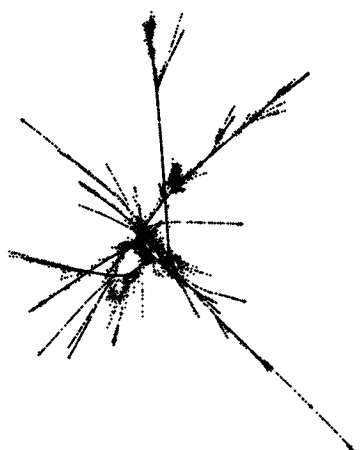

**CL56**

Number of reads: 17981  
 Number of pairs: 741079  
 Density: 0.004584  
 Diameter: NA  
 Mean edge weight: 122.41  
 Max. degree: 487

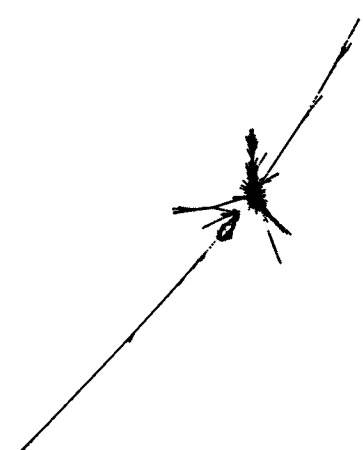

**CL57**

Number of reads: 17649  
 Number of pairs: 295203  
 Density: 0.001896  
 Diameter: NA  
 Mean edge weight: 104.97  
 Max. degree: 1050

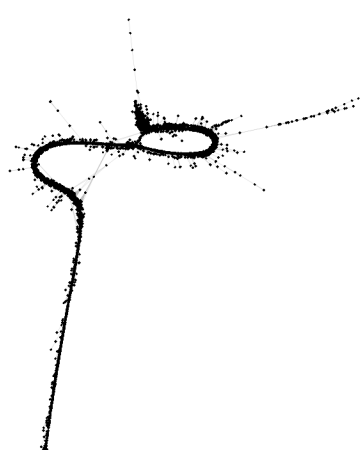

**CL58**

Number of reads: 17377  
 Number of pairs: 4395520  
 Density: 0.02911  
 Diameter: NA  
 Mean edge weight: 138.12  
 Max. degree: 1139

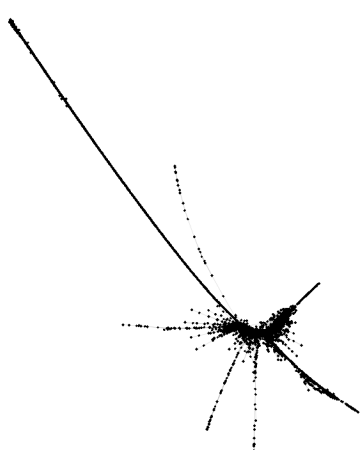

**CL59**

Number of reads: 17287  
 Number of pairs: 6351871  
 Density: 0.04251  
 Diameter: NA  
 Mean edge weight: 127.76  
 Max. degree: 1935

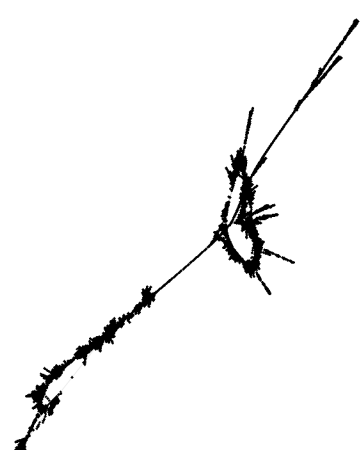

**CL60**

Number of reads: 17071  
 Number of pairs: 85850  
 Density: 0.0005892  
 Diameter: NA  
 Mean edge weight: 116.86  
 Max. degree: 185

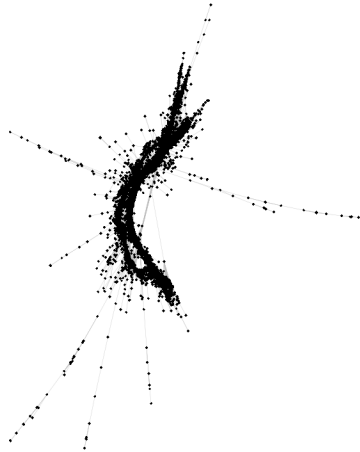

**CL61**

Number of reads: 16919  
Number of pairs: 6411973  
Density: 0.0448  
Diameter: NA  
Mean edge weight: 127.48  
Max. degree: 1586

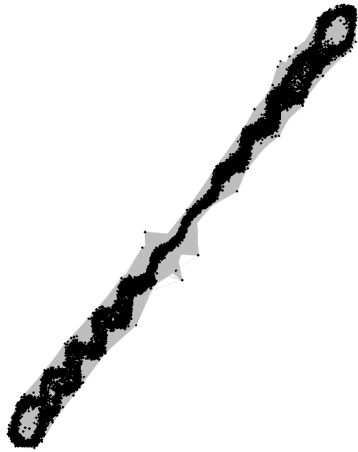

**CL62**

Number of reads: 16598  
Number of pairs: 23959546  
Density: 0.1739  
Diameter: NA  
Mean edge weight: 154.81  
Max. degree: 3334

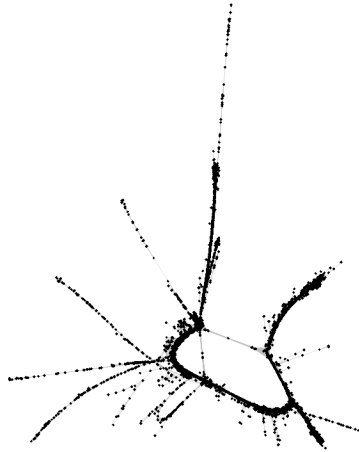

**CL63**

Number of reads: 16502  
Number of pairs: 3930976  
Density: 0.02887  
Diameter: NA  
Mean edge weight: 144.42  
Max. degree: 884

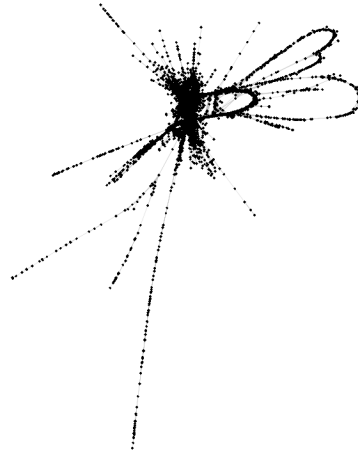

**CL64**

Number of reads: 16355  
Number of pairs: 3108263  
Density: 0.02324  
Diameter: NA  
Mean edge weight: 116.98  
Max. degree: 1719

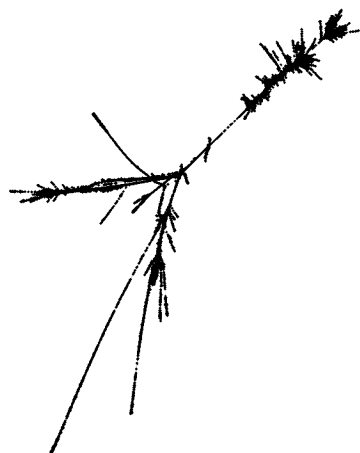

**CL65**

Number of reads: 16248  
Number of pairs: 564837  
Density: 0.004279  
Diameter: NA  
Mean edge weight: 116.39  
Max. degree: 407

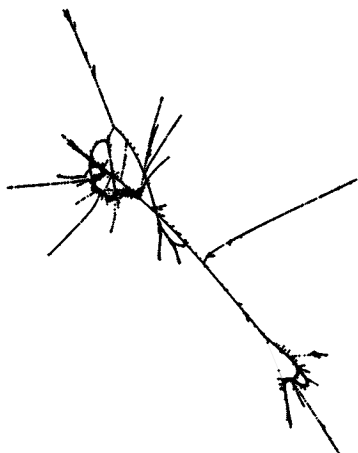

**CL66**

Number of reads: 16242  
Number of pairs: 521391  
Density: 0.003953  
Diameter: NA  
Mean edge weight: 121.7  
Max. degree: 265

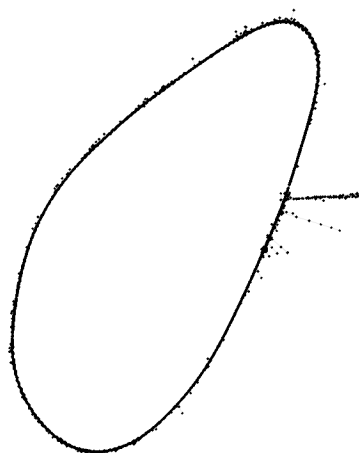

**CL67**

Number of reads: 15954  
Number of pairs: 1632215  
Density: 0.01283  
Diameter: NA  
Mean edge weight: 153.1  
Max. degree: 429

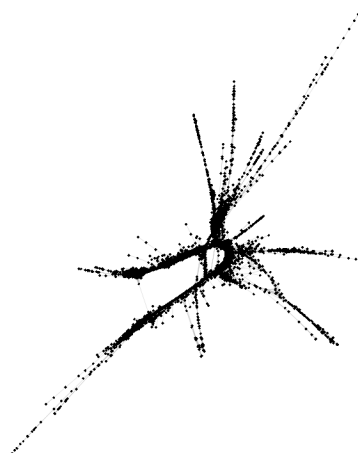

**CL68**

Number of reads: 15942  
Number of pairs: 4425306  
Density: 0.03483  
Diameter: NA  
Mean edge weight: 133.83  
Max. degree: 1041

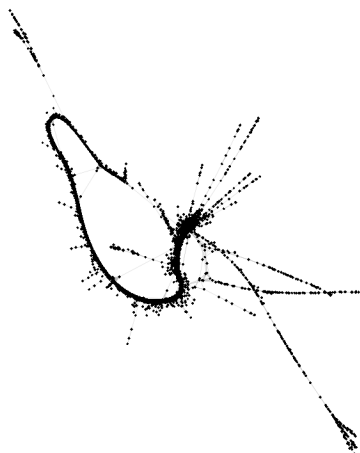

**CL69**

Number of reads: 15932  
Number of pairs: 3090369  
Density: 0.02435  
Diameter: NA  
Mean edge weight: 134.78  
Max. degree: 1268

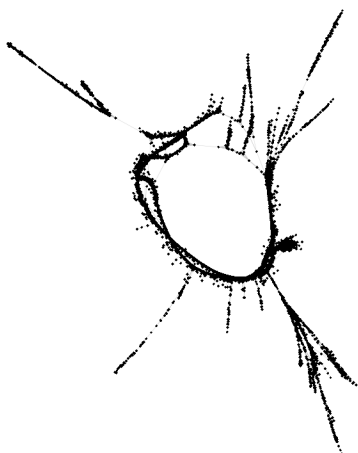

**CL70**

Number of reads: 15875  
Number of pairs: 1470193  
Density: 0.01167  
Diameter: NA  
Mean edge weight: 138.6  
Max. degree: 563

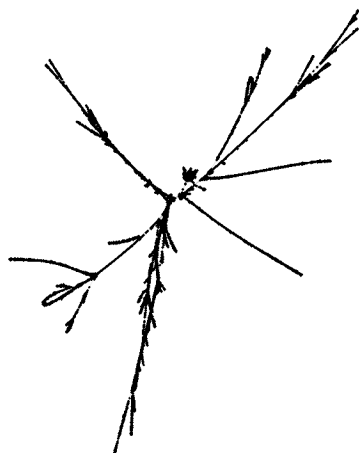

**CL71**

Number of reads: 15821  
Number of pairs: 206986  
Density: 0.001654  
Diameter: NA  
Mean edge weight: 129.4  
Max. degree: 205

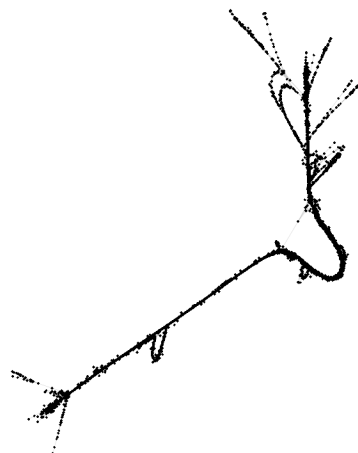

**CL72**

Number of reads: 15805  
Number of pairs: 1944166  
Density: 0.01557  
Diameter: NA  
Mean edge weight: 139.75  
Max. degree: 435

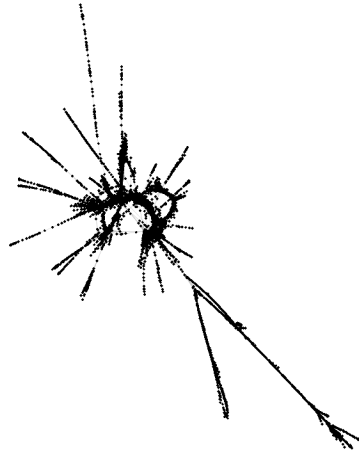

**CL73**

Number of reads: 15730  
Number of pairs: 778580  
Density: 0.006294  
Diameter: NA  
Mean edge weight: 114.5  
Max. degree: 630

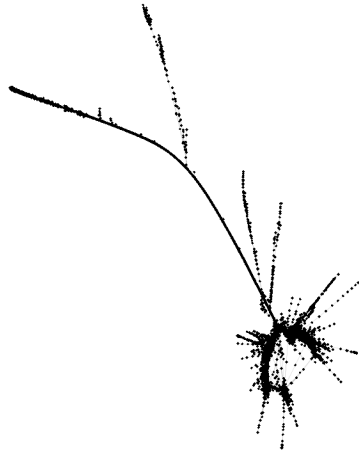

**CL74**

Number of reads: 15692  
Number of pairs: 1693258  
Density: 0.01375  
Diameter: NA  
Mean edge weight: 128.72  
Max. degree: 726

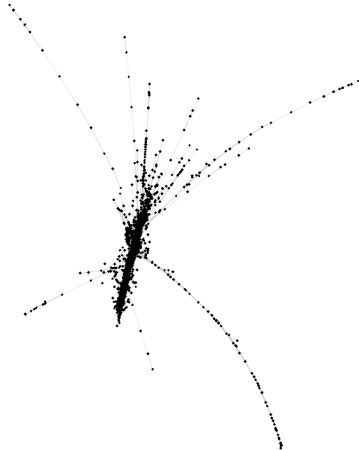

**CL75**

Number of reads: 15660  
Number of pairs: 11439304  
Density: 0.0933  
Diameter: NA  
Mean edge weight: 124.24  
Max. degree: 2819

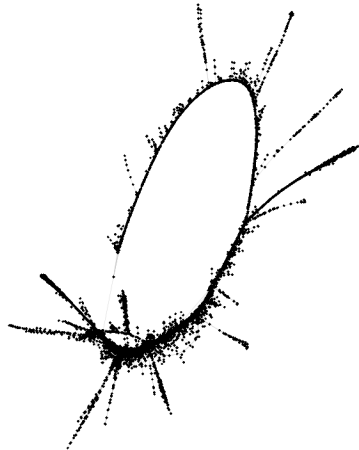

**CL76**

Number of reads: 15586  
Number of pairs: 2049073  
Density: 0.01687  
Diameter: NA  
Mean edge weight: 136.66  
Max. degree: 783

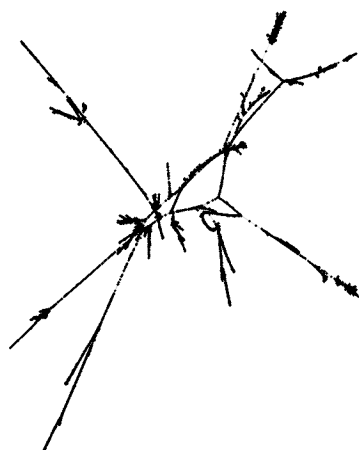

**CL77**

Number of reads: 15366  
Number of pairs: 192334  
Density: 0.001629  
Diameter: NA  
Mean edge weight: 125.38  
Max. degree: 187

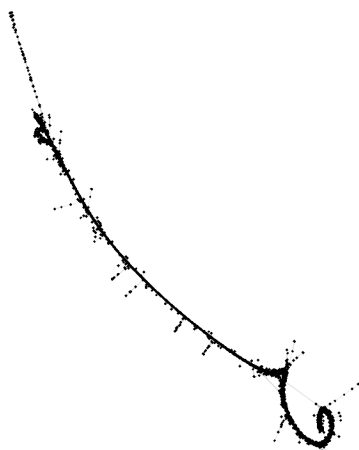

**CL78**

Number of reads: 15194  
Number of pairs: 2584341  
Density: 0.02239  
Diameter: NA  
Mean edge weight: 142.55  
Max. degree: 471

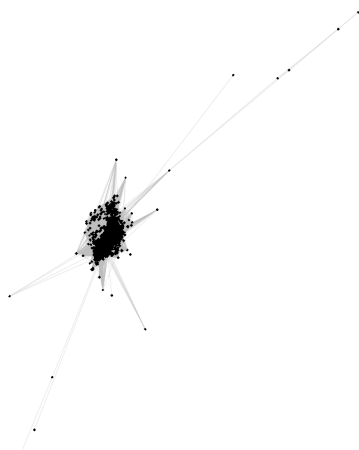

**CL79**

Number of reads: 10783  
Number of pairs: 25061348  
Density: 0.4311  
Diameter: NA  
Mean edge weight: 135.04  
Max. degree: 6222

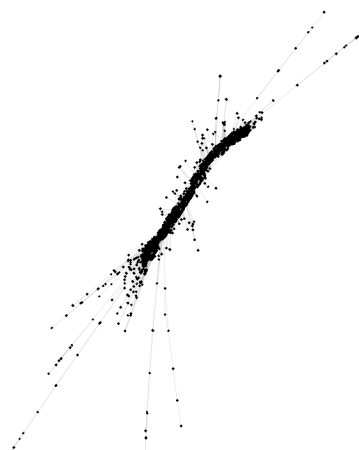

**CL80**

Number of reads: 14983  
Number of pairs: 12439301  
Density: 0.1108  
Diameter: NA  
Mean edge weight: 143.49  
Max. degree: 2092

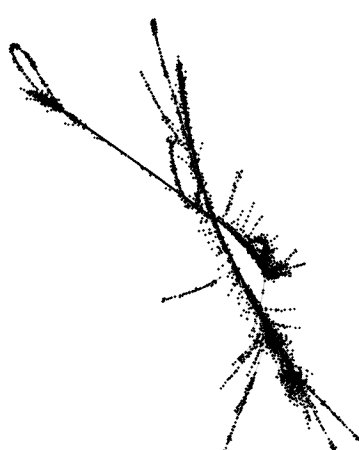

**CL81**

Number of reads: 14884  
Number of pairs: 1724321  
Density: 0.01557  
Diameter: NA  
Mean edge weight: 132.47  
Max. degree: 749

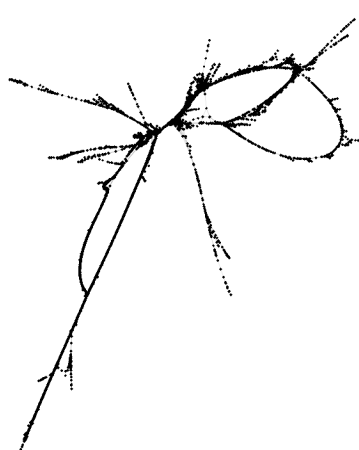

**CL82**

Number of reads: 14743  
Number of pairs: 1707725  
Density: 0.01571  
Diameter: NA  
Mean edge weight: 142.85  
Max. degree: 1308

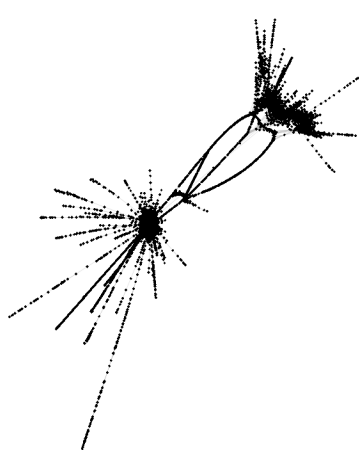

**CL83**

Number of reads: 14471  
Number of pairs: 2969693  
Density: 0.02836  
Diameter: NA  
Mean edge weight: 104.92  
Max. degree: 2642

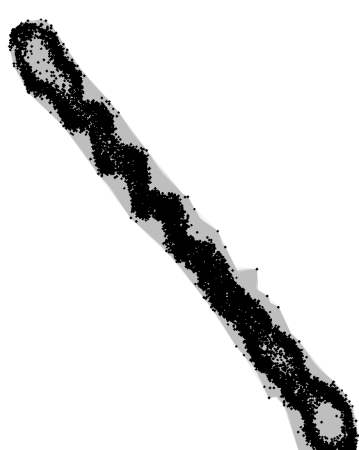

**CL84**

Number of reads: 14449  
Number of pairs: 23711094  
Density: 0.2272  
Diameter: NA  
Mean edge weight: 154.92  
Max. degree: 3712

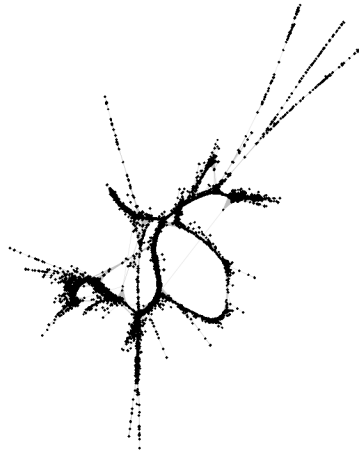

**CL85**

Number of reads: 13861  
Number of pairs: 1809445  
Density: 0.01884  
Diameter: NA  
Mean edge weigth: 123.59  
Max. degree: 688

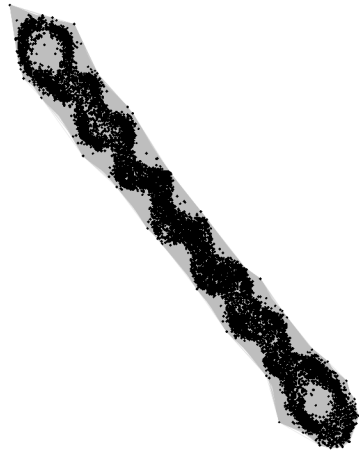

**CL86**

Number of reads: 13524  
Number of pairs: 21986762  
Density: 0.2404  
Diameter: NA  
Mean edge weigth: 155.37  
Max. degree: 3708

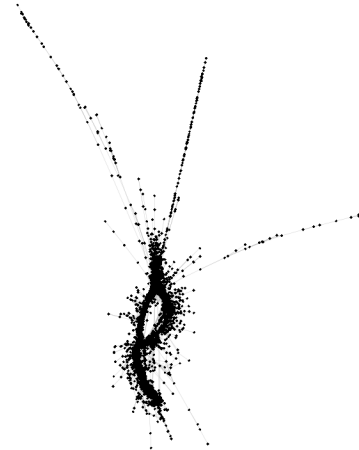

**CL87**

Number of reads: 13153  
Number of pairs: 4373358  
Density: 0.05056  
Diameter: NA  
Mean edge weigth: 121.32  
Max. degree: 1601

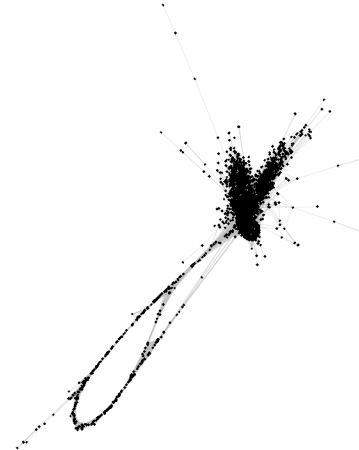

**CL88**

Number of reads: 13050  
Number of pairs: 14598552  
Density: 0.1715  
Diameter: NA  
Mean edge weigth: 121.84  
Max. degree: 8962

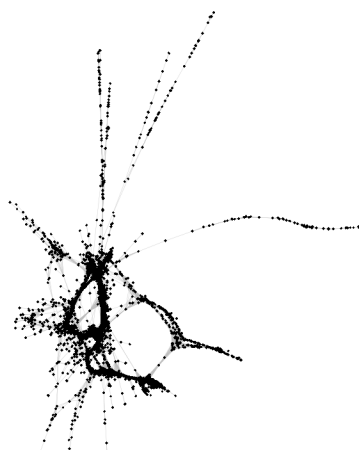

**CL89**

Number of reads: 12112  
Number of pairs: 1788939  
Density: 0.02439  
Diameter: NA  
Mean edge weigth: 129.59  
Max. degree: 1301

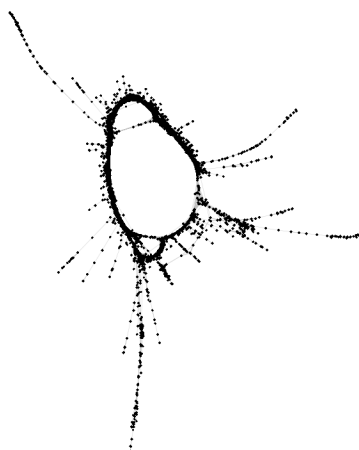

**CL90**

Number of reads: 12041  
Number of pairs: 1444927  
Density: 0.01993  
Diameter: NA  
Mean edge weigth: 121.91  
Max. degree: 562

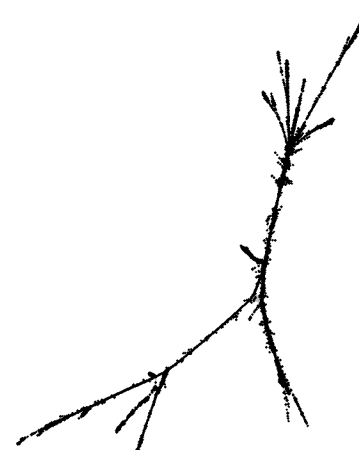

**CL91**

Number of reads: 11746  
Number of pairs: 704494  
Density: 0.01021  
Diameter: NA  
Mean edge weigth: 132.7  
Max. degree: 325

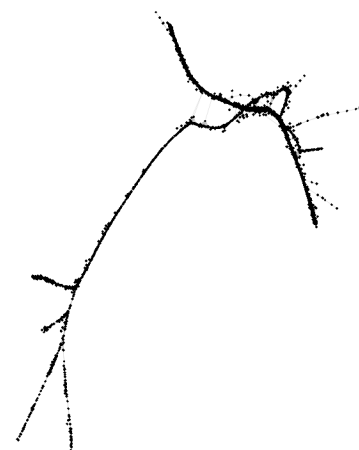

**CL92**

Number of reads: 11591  
Number of pairs: 1553625  
Density: 0.02313  
Diameter: NA  
Mean edge weigth: 143.46  
Max. degree: 433

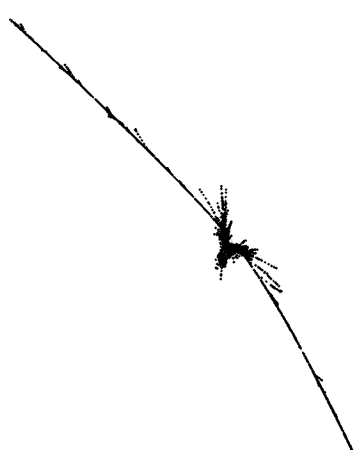

**CL93**

Number of reads: 11565  
Number of pairs: 1763131  
Density: 0.02637  
Diameter: NA  
Mean edge weigth: 112.34  
Max. degree: 959

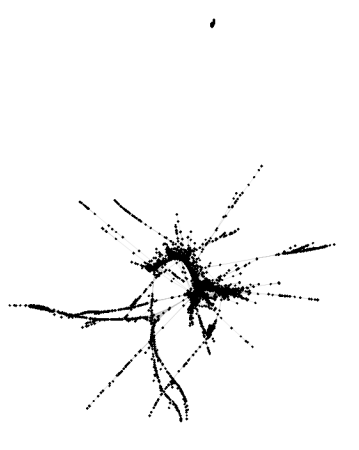

**CL94**

Number of reads: 11500  
Number of pairs: 872418  
Density: 0.01319  
Diameter: NA  
Mean edge weigth: 114.83  
Max. degree: 634

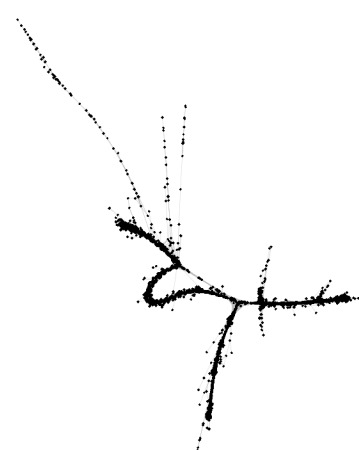

**CL95**

Number of reads: 11387  
Number of pairs: 2414715  
Density: 0.03725  
Diameter: NA  
Mean edge weigth: 145.62  
Max. degree: 882

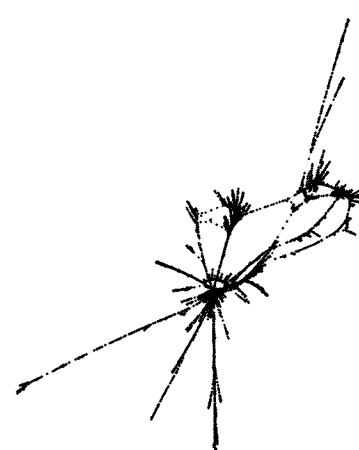

**CL96**

Number of reads: 11331  
Number of pairs: 339980  
Density: 0.005296  
Diameter: NA  
Mean edge weigth: 139.67  
Max. degree: 355



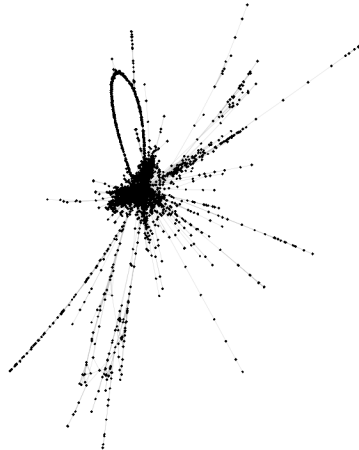

**CL97**

Number of reads: 11003  
Number of pairs: 4644549  
Density: 0.07673  
Diameter: NA  
Mean edge weight: 128.55  
Max. degree: 2475

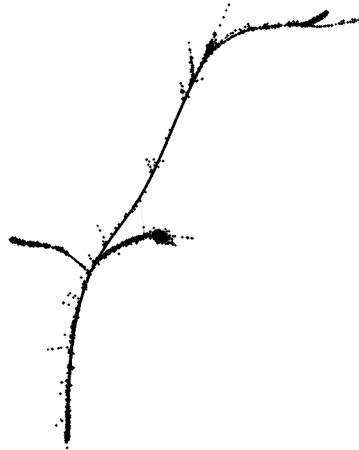

**CL98**

Number of reads: 10966  
Number of pairs: 1434705  
Density: 0.02386  
Diameter: NA  
Mean edge weight: 148.59  
Max. degree: 453

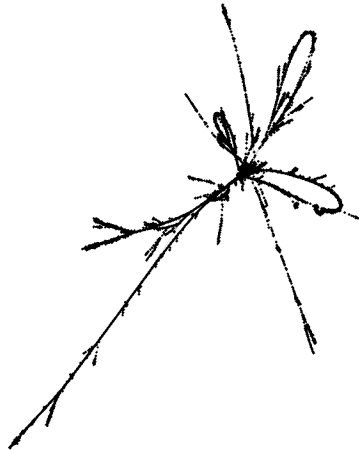

**CL99**

Number of reads: 10928  
Number of pairs: 264198  
Density: 0.004425  
Diameter: NA  
Mean edge weight: 133.01  
Max. degree: 206

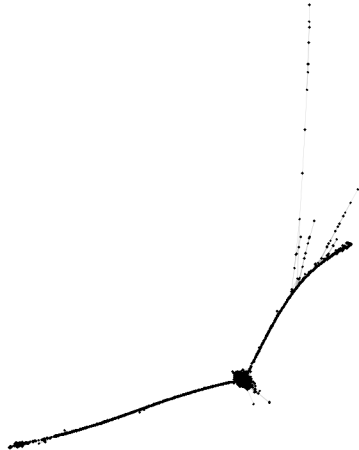

**CL100**

Number of reads: 10897  
Number of pairs: 11774251  
Density: 0.1983  
Diameter: NA  
Mean edge weight: 120.34  
Max. degree: 5535

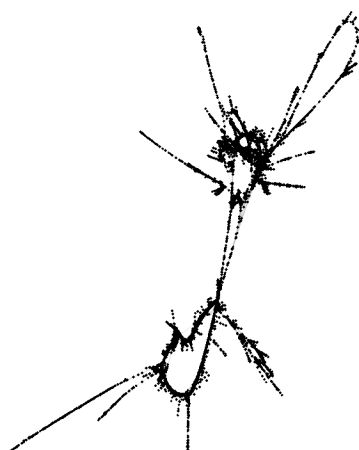

**CL101**

Number of reads: 10853  
Number of pairs: 376423  
Density: 0.006392  
Diameter: NA  
Mean edge weight: 134.28  
Max. degree: 223

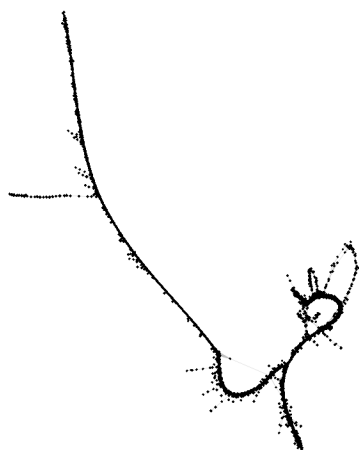

**CL102**

Number of reads: 10823  
Number of pairs: 1126365  
Density: 0.01923  
Diameter: NA  
Mean edge weight: 146.53  
Max. degree: 454

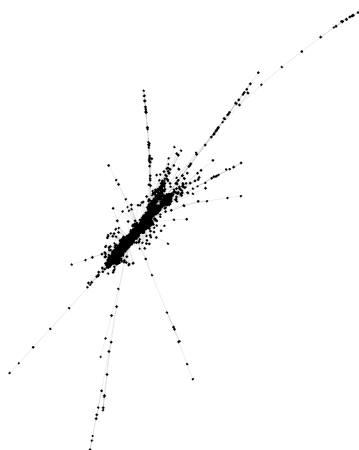

**CL103**

Number of reads: 10788  
Number of pairs: 6338727  
Density: 0.1089  
Diameter: NA  
Mean edge weight: 120.7  
Max. degree: 2106

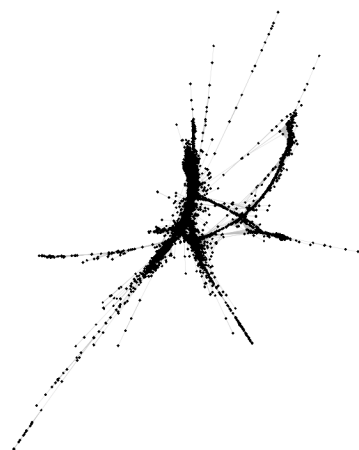

**CL104**

Number of reads: 10677  
Number of pairs: 2397533  
Density: 0.04207  
Diameter: NA  
Mean edge weight: 118.71  
Max. degree: 1654

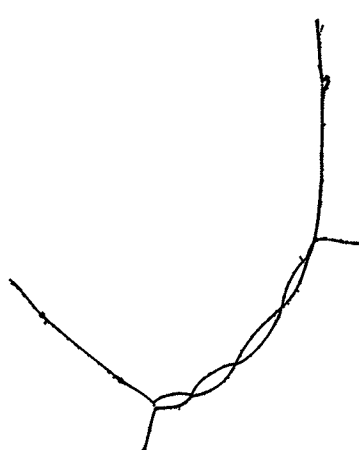

**CL105**

Number of reads: 10589  
Number of pairs: 253094  
Density: 0.004515  
Diameter: NA  
Mean edge weight: 138.49  
Max. degree: 107

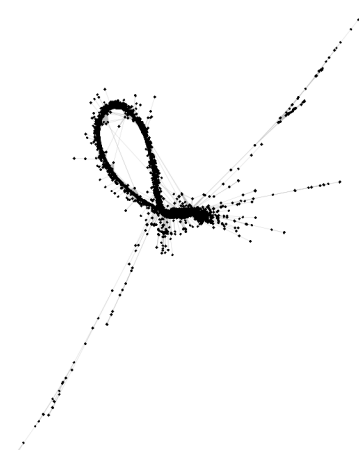

**CL106**

Number of reads: 10535  
Number of pairs: 3471658  
Density: 0.06257  
Diameter: NA  
Mean edge weight: 128.68  
Max. degree: 1455

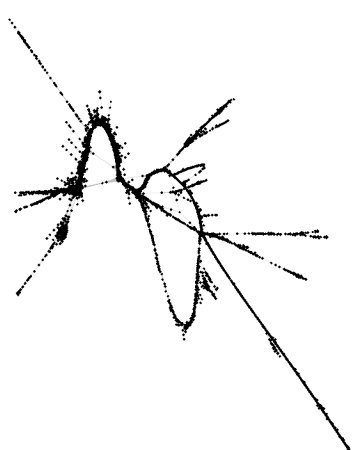

**CL107**

Number of reads: 10451  
Number of pairs: 568732  
Density: 0.01042  
Diameter: NA  
Mean edge weight: 124.94  
Max. degree: 412

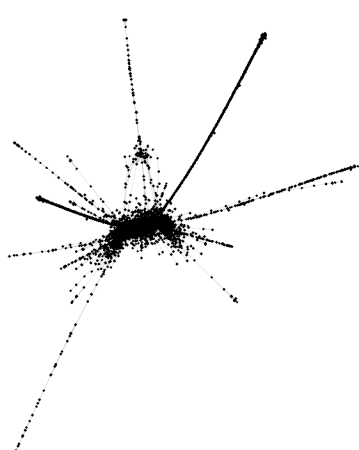

**CL108**

Number of reads: 10366  
Number of pairs: 1515436  
Density: 0.02821  
Diameter: NA  
Mean edge weight: 114.72  
Max. degree: 1370

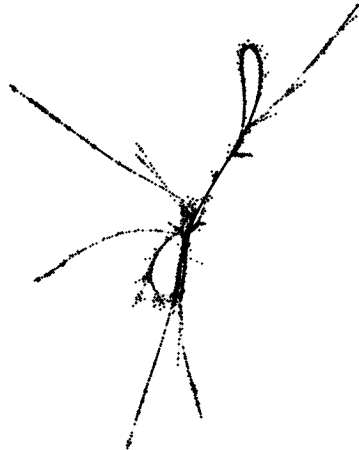

**CL109**

Number of reads: 10342  
Number of pairs: 1316587  
Density: 0.02462  
Diameter: NA  
Mean edge weight: 135.46  
Max. degree: 628

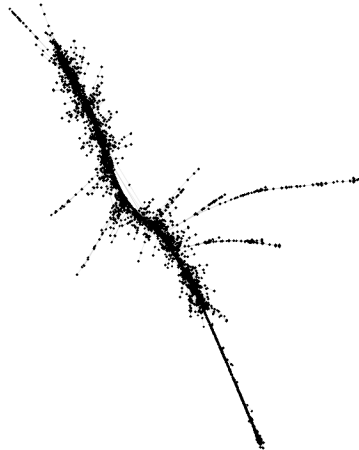

**CL110**

Number of reads: 10289  
Number of pairs: 1484013  
Density: 0.02804  
Diameter: NA  
Mean edge weight: 134.05  
Max. degree: 637

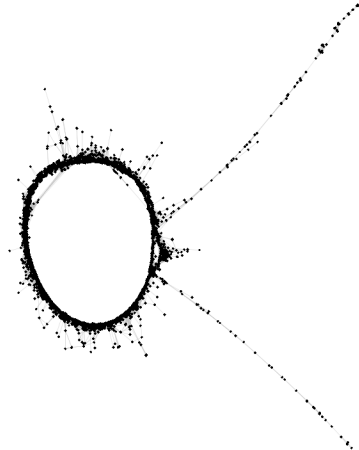

**CL111**

Number of reads: 10261  
Number of pairs: 1664297  
Density: 0.03162  
Diameter: NA  
Mean edge weight: 129.77  
Max. degree: 533

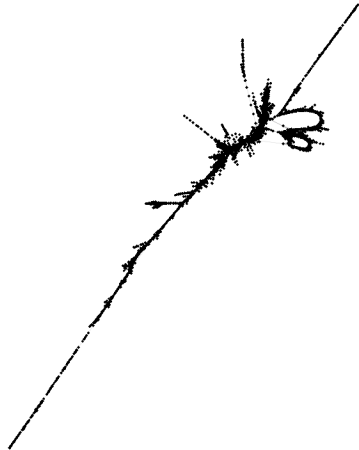

**CL112**

Number of reads: 10186  
Number of pairs: 450315  
Density: 0.008681  
Diameter: NA  
Mean edge weight: 117.55  
Max. degree: 394

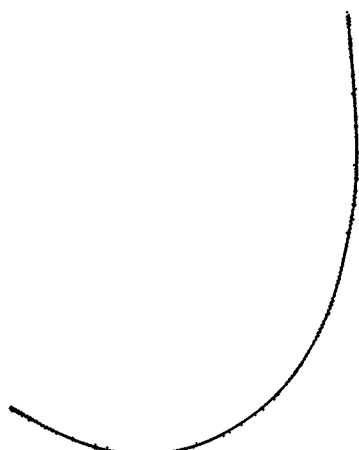

**CL113**

Number of reads: 10122  
Number of pairs: 771262  
Density: 0.01506  
Diameter: NA  
Mean edge weight: 154.21  
Max. degree: 217

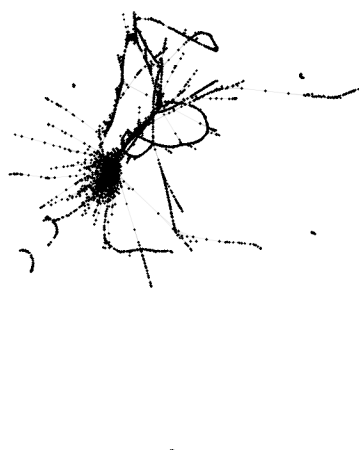

**CL114**

Number of reads: 10031  
Number of pairs: 537065  
Density: 0.01068  
Diameter: NA  
Mean edge weight: 115.59  
Max. degree: 732
