# Supplementary material for: Structural and Functional Analysis of Transposable Elements Focusing on B Chromosomes of the Cichlid Fish <em>Astatotilapia latifasciata</em>
Source: Preprints.org preprint supplement (doi:10.20944/preprints201803.0145.v1), 2018-03-19
Supplement: Supplementary file 2 [file SupplementaryFigure1.docx]

**Supplementary Figure 1.** Repetitive elements transcription levels quantified by RPKM metrics for brain, muscle and male and female gonads of B- individuals. The graph shows repeat superfamiles which includes various families with their respective copies. Each boxplot represents a range of expression values (log2 RPKM) from all expressed copies in the tissue. Although some superfamiles have only one highly expressed copy (srpRNA), most shows wide transcription distribution. The distinct superfamilies analyzed are indicated in the bottom.

**
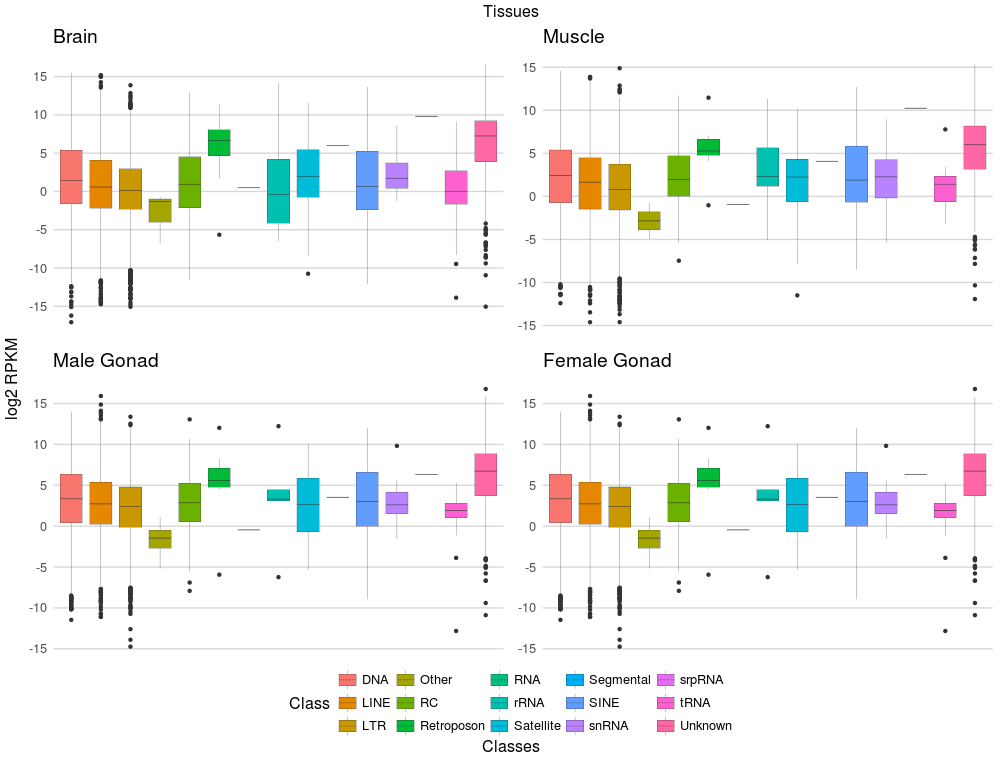
**
