# Supplementary material for: Structural and Functional Analysis of Transposable Elements Focusing on B Chromosomes of the Cichlid Fish <em>Astatotilapia latifasciata</em>
Source: Preprints.org preprint supplement (doi:10.20944/preprints201803.0145.v1), 2018-03-19
Supplement: Supplementary file 5 [file Supplementary_file_1.xlsx]

## Sheet: 0B
Supplementary File 1: Repeat copy number of families and superfamilies on the A. latifasciata 0B genome detected by RepeatMasker. Count, number of copies; bp Masked, number of base pairs masked by that specific element in the gneome; masked (%), element percentage on the genome.
Repeat Classes
==============
Total Sequences:	218259
Total Length:	758543724
Class	Count	bp Masked	masked (%)		Class	Count	bp Masked	masked (%)		Class	Count	bp Masked	masked (%)		Class	Count	bp Masked	masked (%)		Class	Count	bp Masked	masked (%)		Class	Count	bp Masked	masked (%)
DNA	70545	9591312	0.0126		LINE	1774	212762	0.0003		LTR	1851	225901	0.0003		SINE	1679	207905	0.0003		Other	3	422	0		Low_complexity	34450	1609867	0.0021
Academ	503	22987	0		CR1	1089	56508	0.0001		Copia	1286	253519	0.0003		5S	30	1428	0		DNA_virus	17	610	0		RNA	10	446	0
Academ2	18	1053	0		CR1-Zenon	290	57632	0.0001		DIRS	1513	355559	0.0005		5S-Core-RTE	4	271	0		Retroposon	3877	955262	0.0013		Satellite	5038	617527	0.0008
CMC-Chapaev	408	18063	0		CRE	6	424	0		ERV	181	9776	0		5S-Deu-L2	1732	56165	0.0001		SVA	4	262	0		Y-chromosome	5	242	0
CMC-Chapaev-3	488	54591	0.0001		DRE	4	207	0		ERV-Foamy	8	405	0		5S-Sauria-RTE	123	9406	0		Segmental	5	236	0		centr	8	1469	0
CMC-EnSpm	18393	2263734	0.003		Dong-R4	9150	2448967	0.0032		ERV-Lenti	2	101	0		7SL	8	1016	0		Unknown	322699	53635854	0.0707		macro	48	3491	0
CMC-Mirage	4	274	0		I	1458	237274	0.0003		ERV1	7922	1300811	0.0017		Alu	13	1583	0		TOTAL	326605	54592646	0.072		Simple_repeat	229887	9667831	0.0127
CMC-Transib	338	19721	0		I-Nimb	132	42224	0.0001		ERV4	132	7600	0		B2	4	220	0							rRNA	1500	197569	0.0003
Crypton	75	6937	0		Jockey	821	55550	0.0001		ERVK	3145	276857	0.0004		B4	25	1131	0							scRNA	1	104	0
Crypton-H	7	697	0		L1	21187	5144393	0.0068		ERVL	245	13776	0		ID	22	968	0							snRNA	109	11558	0
Crypton-V	600	42782	0.0001		L1-Tx1	2419	498509	0.0007		ERVL-MaLR	38	3435	0		L2	5	282	0							srpRNA	18	3214	0
Dada	2873	157011	0.0002		L2	92444	18489818	0.0244		Gypsy	17806	4629212	0.0061		MIR	16670	2002434	0.0026							tRNA	955	59672	0.0001
Ginger	1428	78816	0.0001		L2-Hydra	9	636	0		Gypsy-Troyka	9	531	0		RTE-BovB	5	347	0							TOTAL	272029	12172990	0.016
Harbinger	58	3653	0		LOA	101	5610	0		Ngaro	12486	1076482	0.0014		U	5	245	0
IS3EU	2435	285044	0.0004		Odin	5	268	0		Pao	5840	1599144	0.0021		tRNA	1994	209542	0.0003
Kolobok	27	1950	0		Penelope	28071	4313709	0.0057		TOTAL	52464	9753109	0.0128		tRNA-7SL	1	43	0
Kolobok-Hydra	363	19006	0		Proto2	225	61121	0.0001							tRNA-C	27	1479	0
Kolobok-T2	1734	61653	0.0001		R1	544	33055	0							tRNA-CR1	5	268	0
MULE-F	2	116	0		R2	158	10322	0							tRNA-Core	12616	1670972	0.0022
MULE-MuDR	514	48734	0.0001		R2-Hero	1002	306294	0.0004							tRNA-Core-L2	11453	1387716	0.0018
MULE-NOF	108	9469	0		R2-NeSL	7	917	0							tRNA-Core-RTE	7	337	0
Maverick	2622	211548	0.0003		RTE	6222	909572	0.0012							tRNA-Deu	2	157	0
Merlin	1604	64068	0.0001		RTE-BovB	27508	6416611	0.0085							tRNA-Deu-L2	83	3142	0
P	1965	429254	0.0006		RTE-RTE	10	671	0							tRNA-L2	53	3201	0
PIF-Harbinger	11423	2175244	0.0029		RTE-RTEX	15	894	0							tRNA-Mermaid	1217	106207	0.0001
PIF-ISL2EU	1135	257745	0.0003		RTE-X	306	20369	0							tRNA-RTE	24	820	0
PiggyBac	12866	2729557	0.0036		Rex-Babar	40220	8064564	0.0106							tRNA-Rex	1	62	0
Sola	3176	204285	0.0003		TOTAL	235177	47388881	0.0626							tRNA-Sauria	3	231	0
TcMar	504	33170	0												tRNA-Sauria-L2	1	43	0
TcMar-Fot1	887	136055	0.0002												tRNA-V	18156	2435761	0.0032
TcMar-ISRm11	2396	449778	0.0006												tRNA-V-CR1	538	28719	0
TcMar-Mariner	124	7914	0												tRNA-V-Core-L2	141	8020	0
TcMar-Pogo	20	1019	0												TOTAL	66647	8140121	0.0106
TcMar-Stowaway	47	4228	0
TcMar-Tc1	149220	33134074	0.0437
TcMar-Tc2	10355	2276082	0.003
TcMar-Tc4	11	696	0
TcMar-Tigger	3834	704151	0.0009
TcMar-m44	7	411	0
Zator	53	2953	0
Zisupton	668	34689	0
hAT	23167	3420840	0.0045
hAT-Ac	74006	13418194	0.0177
hAT-Blackjack	1570	208907	0.0003
hAT-Charlie	37310	6901211	0.0091
hAT-Pegasus	150	8754	0
hAT-Tag1	114	6274	0
hAT-Tip100	10027	1650374	0.0022
hAT-Tol2	6811	1535798	0.002
hAT-hAT1	6	355	0
hAT-hAT19	5	273	0
hAT-hAT5	758	150878	0.0002
hAT-hAT6	367	13210	0
hAT-hATm	259	12874	0
hAT-hATw	70	3458	0
hAT-hATx	53	2379	0
hAT-hobo	397	54368	0.0001
RC	--	--	--
Helitron	5135	606714	0.0008
TOTAL	464043	83539385	0.1101
