# Supplementary material for: Structural and Functional Analysis of Transposable Elements Focusing on B Chromosomes of the Cichlid Fish <em>Astatotilapia latifasciata</em>
Source: Preprints.org preprint supplement (doi:10.20944/preprints201803.0145.v1), 2018-03-19
Supplement: Supplementary file 6 [file Supplementary_file_4.xlsx]

## Sheet: Repeats_ALL_individuals_counts
Supplementary file 4: Coverage ratios normalized to the M1-0B genome as reference. (expanded from Table 2).
Element	Class	Family	F1-0B/M1-0B	F2-1B/M1-0B	M2-1B/M1-0B	M3-1B/M1-0B	M4-2B/M1-0B
Maui	LINE	L2	777.82	916.342	626.595	665.771	312.378
AlRepB-60	DNA	DNA	534.698	657.51	522.165	541	263.007
L1-1_AFC	LINE	L1	867.642	894.626	535.315	537.135	145.023
Gypsy-188_DR-I	LTR	Gypsy	0	357.903	478.746	505.949	977.983
AlRepB-26	LINE	L2	2.0721	454.472	438.117	454.366	976.85
SINE_AFC	SINE	tRNA-Core-L2	84.7259	339.773	424.325	437.93	656.478
AlRepB-420	Unknown	Unknown	177.412	397.86	388.079	415.263	582.663
AlRepD-1014	DNA	CMC-EnSpm	203.627	182.559	369.974	387.536	75.2152
AlRepC-1805	rRNA	rRNA	172.269	267.23	371.404	386.309	79.3123
AlRepB-738	DNA	hAT-Ac	23.6717	320.79	356.625	382.227	631.881
Gypsy-23_GA-I	LTR	Gypsy	0	311.827	336.767	360.227	709.623
BEL32-I_DR	LTR	Pao	11.2406	276.16	324.038	343.452	731.48
SINE_FR2	SINE	tRNA-V	55.3977	303.347	313.987	333.166	546.522
Mariner-N13_DR	DNA	TcMar-Tc1	17.8095	276.374	294.65	312.57	648.306
BEL32-LTR_DR	LTR	Pao	5.46088	215.989	278.118	309.231	593.383
TC1_FR5	DNA	TcMar-Tc1	390.292	399.484	324.485	307.142	32.3478
AlRepA-66	DNA	hAT-Ac	423.722	414.02	305.987	298.757	6.34732
AlRepD-1576	Unknown	Unknown	0	258.565	268.552	298.598	510.408
AlRepA-102	DNA	TcMar-Tc1	20.3826	268.861	256.561	272.349	531.602
AlRepB-127	DNA	DNA	303.607	445.474	261.389	259.697	97.9666
AlRepB-161	LINE	RTE-BovB	41.1903	175.838	228.638	237.178	210.006
AlRepB-250	DNA	DNA	152.952	307.6	221.285	236.645	317.454
AlRepB-126	DNA	hAT-Ac	149.025	246.868	216.862	233.964	226.429
AlRepC-572	Unknown	Unknown	47.0827	121.076	225.406	233.73	404.738
AlRepB-103	LINE	RTE-BovB	110.248	188.508	228.239	230.077	168.309
AlRepB-450	Unknown	Unknown	86.8227	122.475	193.206	219.665	74.4561
AlRepA-386	LTR	Ngaro	19.5206	223.881	194.607	218.705	368.635
AlRepB-429	DNA	hAT-Ac	82.8816	229.286	210.526	216.791	277.217
AlRepB-2	DNA	hAT-Ac	207.278	248.312	199.712	213.392	130.521
AlRepD-484	Unknown	Unknown	43.1193	240.563	198.917	212.261	304.462
AlRepD-1969	LINE	Rex-Babar	2.11773	154.668	201.381	210.927	360.197
AlRepB-112	Unknown	Unknown	14.5216	209.573	187.539	208.135	422.318
AlRepC-849	LINE	Rex-Babar	59.6125	147.937	197.34	205.337	298.702
AlRepC-66	DNA	PIF-Harbinger	94.347	199.31	182.963	198.704	177.507
AlRepE-1560	DNA	hAT	9.76778	188.538	177.211	191.618	294.77
AlRepC-216	Unknown	Unknown	0	183.762	176.207	189.767	382.127
AlRepC-143	Unknown	Unknown	0	176.059	164.717	189.614	388.57
AlRepD-435	Unknown	Unknown	0	161.289	160.446	182.763	338.339
AlRepC-693	Unknown	Unknown	2.16625	189.988	172.727	182.408	377.391
REX1-3_AFC	LINE	Rex-Babar	156.063	201.172	194.084	182.403	147.23
REX3_XM	LINE	RTE	7.60881	173.841	165.11	177.099	306.53
AlRepA-4	DNA	hAT-Charlie	4.74924	158.271	166.178	175.315	324.122
Dong_FR	LINE	Dong-R4	125.411	158.048	181.706	173.893	138.001
AlRepA-125	DNA	PiggyBac	9.68529	153.727	162.307	171.336	321.126
KibiFr1	LINE	L1	11.9614	176.54	160.454	170.762	286.146
AlRepB-1625	Unknown	Unknown	13.8157	148.16	162.498	170.514	293.527
AlRepC-258	Unknown	Unknown	181.284	247.005	161.05	165.727	83.5525
AlRepD-813	Unknown	Unknown	20.2838	134.003	162.201	161.263	215.949
AlRepC-767	Unknown	Unknown	92.867	190.617	169.538	158.697	148.085
AlRepB-731	DNA	TcMar-Tc2	67.9095	124.41	142.446	155.296	214.587
AlRepB-365	Unknown	Unknown	322.993	328.916	159.119	152.104	2.30376
AlRepD-1165	LINE	L2	29.1509	100.715	147.198	150.128	265.704
AlRepD-1644	Unknown	Unknown	0	165.795	137.334	149.142	329.55
AlRepD-371	Unknown	Unknown	144.221	148.909	137.561	146.571	43.1269
Rex1_FurC	LINE	Rex-Babar	29.4937	122.925	140.537	144.624	184.395
AlRepC-1280	DNA	PIF-Harbinger	56.9506	191.646	151.779	142.839	147.328
AlRepE-2863	Unknown	Unknown	2.11669	127.509	128.264	141.843	235.916
AlRepC-2352	Unknown	Unknown	22.0117	46.5992	124.008	140.587	267.755
AlRepD-229	Unknown	Unknown	169.663	150.339	137.087	140.292	71.2524
AlRepB-124	DNA	DNA	4.15966	126.107	125.997	139.617	285.037
AlRepB-358	DNA	hAT-Ac	207.765	209.305	146.771	139.403	11.8214
Tc1-2_FR	DNA	TcMar-Tc1	389.75	397.393	156.168	132.842	13.4546
AlRepC-696	DNA	CMC-EnSpm	119.147	113.882	136.371	128.599	95.0565
AlRepD-1119	LINE	L2	22.3971	88.163	115.728	126.923	187.151
AlRepC-136	DNA	hAT-Ac	85.853	203.45	114.892	126.905	81.001
AlRepC-374	Unknown	Unknown	19.1448	62.4333	121.542	123.588	217.039
Penelope-1_AFC	LINE	Penelope	100.235	135.789	119.006	121.59	137.335
AlRepE-193	Unknown	Unknown	6.29528	57.178	123.299	120.948	114.179
AlRepD-1964	Unknown	Unknown	24.49	117.836	121.222	120.855	160.237
AlRepD-424	Unknown	Unknown	93.3496	139.999	122.774	117.434	45.0991
AlRepC-195	Unknown	Unknown	2.11645	75.3071	116.65	116.801	226.86
Rex1-1B_FR	LINE	Rex-Babar	75.684	165.439	101.232	111.526	131.595
AlRepC-46	Unknown	Unknown	108.589	124.314	67.1008	111.246	4.21075
DNA-TA-5_DR	DNA	TcMar-Tigger	3.63805	155.893	100.057	109.153	234.502
AlRepA-24	SINE	MIR	60.8795	128.843	88.8542	108.044	174.039
AlRepB-234	DNA	PiggyBac	176.808	176.451	89.1741	106.24	21.8762
AlRepB-923	DNA	hAT-Charlie	40.5979	67.3813	90.9456	105.396	166.28
AlRepD-497	Unknown	Unknown	11.1919	57.2129	108.233	104.362	159.991
AlRepD-1636	Unknown	Unknown	23.3527	94.0396	96.7396	104.006	111.774
AlRepD-990	LTR	ERV1	26.3975	105.18	93.1886	102.845	168.686
AlRepD-4997	Unknown	Unknown	129.442	116.217	104.225	101.506	21.4967
AlRepB-304	Unknown	Unknown	0	92.738	94.8353	99.1553	193.313
AlRepA-93	LINE	L2	45.7918	76.3564	90.1307	99.0442	88.1875
TC1DR3	DNA	TcMar-Tc1	7.0375	93.8446	92.3661	97.4364	228.216
DNA7-N1_DR	DNA	DNA	40.1287	71.1848	87.1471	94.8968	161.59
AlRepB-193	LINE	Penelope	31.0285	66.1279	96.3219	94.8273	196.458
AlRepE-1110	Unknown	Unknown	16.8508	62.6613	89.0298	93.9498	108.933
REX1-1_AFC	LINE	Rex-Babar	132.339	145.039	93.2761	93.2261	12.0798
AlRepC-927	DNA	hAT-Ac	253.978	250.688	96.813	92.9096	0
AlRepB-727	DNA	hAT-Ac	122.415	133.996	96.9576	92.2278	21.0933
Bridge1_FR	LINE	Penelope	95.2317	58.6906	83.9093	90.7806	112.668
REX1-2_AFC	LINE	Rex-Babar	170.249	174.989	104.246	88.6829	5.04212
Expander	LINE	RTE	11.287	50.1209	82.5693	86.5892	42.7796
AlRepD-297	Unknown	Unknown	4.15219	64.6078	73.6647	85.6206	116.849
AlRepE-3334	DNA	PIF-Harbinger	77.0679	142.07	86.797	85.5336	61.1499
CR1-2_FR	LINE	Rex-Babar	22.3229	65.4756	98.191	84.9067	102.647
AlRepD-1291	Unknown	Unknown	24.9312	54.0544	75.8589	82.7591	75.0629
L2-3_DRe	LINE	L2	114.602	124.349	80.1005	81.7231	8.47956
AlRepD-245	LINE	Rex-Babar	31.4565	121.701	72.5577	81.3888	97.7312
AlRepD-386	Unknown	Unknown	5.05773	24.5221	76.7485	81.121	119.592
AlRepD-467	RC	Helitron	60.8708	77.7652	95.0416	80.4958	13.4005
AlRepC-702	Unknown	Unknown	110.222	78.4705	88.171	80.1526	2.52706
Tc1-9_Xt	DNA	TcMar-Tc1	17.1309	78.8803	74.7049	78.8844	192.224
AlRepB-59	DNA	hAT-Tip100	94.8334	111.908	92.0584	78.3137	28.4789
AlRepD-3077	DNA	PIF-Harbinger	79.1919	143.602	83.3205	76.935	57.9626
Dong2_FR	LINE	Dong-R4	96.5718	102.697	82.3142	75.8906	41.1847
AlRepD-934	Unknown	Unknown	40.9938	94.4588	85.6398	73.88	45.6161
AlRepD-6552	Unknown	Unknown	7.09906	82.966	65.7105	73.2587	107.779
AlRepC-690	Unknown	Unknown	155.189	155.071	70.6433	72.4343	2.38132
REX1-4_AFC	LINE	Rex-Babar	86.4647	102.758	77.4882	72.3666	72.1934
AlRepB-356	Unknown	Unknown	93.6523	79.95	72.5748	71.4608	54.4374
AlRepB-148	Unknown	Unknown	71.5898	90.0269	57.3183	70.1489	5.39173
AlRepA-21	LINE	L2	22.318	38.1609	68.8134	70.0816	108.522
AlRepE-584	Unknown	Unknown	44.9371	104.572	60.6371	69.3835	60.9742
AlRepC-87	Unknown	Unknown	87.5847	102.492	62.3812	68.5237	51.8484
SINE3-1a	SINE	5S-Deu-L2	13.6488	86.8799	75.0708	67.3818	91.0497
Tc1-2_PM	DNA	TcMar-Tc1	23.2692	70.7954	64.0395	65.8197	147.903
AlRepC-17	Unknown	Unknown	4.16235	23.3378	64.1129	65.4626	144.633
AlRepC-555	DNA	PiggyBac	43.4099	86.5263	64.8904	64.6933	78.6852
AlRepA-115	DNA	DNA	0	57.8255	58.9089	63.7987	169.245
AlRepD-4	Unknown	Unknown	78.4059	101.209	65.0421	63.1791	14.1456
AlRepC-346	LINE	L2	113.203	130.226	62.6502	63.0615	2.37033
DNA-8-25_DR	DNA	hAT-Ac	31.9855	31.3548	86.4031	62.7244	4.18769
AlRepC-349	Unknown	Unknown	12.2658	44.3315	56.0977	61.8541	67.0612
Tc1-1_ACar	DNA	TcMar-Tc1	316.912	309.728	48.4275	61.3555	0
AlRepD-2530	Unknown	Unknown	5.19862	25.0119	63.5604	60.5747	93.1845
AlRepD-685	Unknown	Unknown	41.2096	44.4873	68.0009	60.4546	20.2257
AlRepC-946	DNA	TcMar-Tc1	0	55.1075	57.345	60.0434	122.235
AlRepD-499	Unknown	Unknown	2.00982	15.3027	56.4191	58.7183	101.521
AlRepC-436	DNA	hAT-Ac	41.7982	55.4794	51.5099	58.5835	8.19054
AlRepD-1610	Unknown	Unknown	89.029	57.3627	57.7447	57.2899	4.5277
AlRepD-1008	Unknown	Unknown	4.32274	75.7066	53.494	56.8553	97.1327
AlRepD-4130	DNA	hAT-Ac	37.5911	87.0187	51.0363	56.7974	31.079
AlRepD-4675	Unknown	Unknown	4.9009	52.7941	48.3058	56.2597	107.964
TC1_FR1	DNA	TcMar-Tc1	5.78033	45.3135	52.6165	55.7367	129.944
AlRepD-1816	Unknown	Unknown	63.1653	51.9654	52.2096	54.49	4.78717
AlRepD-111	Unknown	Unknown	11.5092	45.8894	49.8471	54.3536	89.6006
SINE2-1_AFC	SINE	tRNA-Core	18.1091	52.3489	48.7338	53.8904	111.7
AlRepD-211	Unknown	Unknown	19.8049	44.3157	48.3521	53.727	72.5156
AlRepB-438	DNA	hAT-Charlie	49.4992	45.4888	50.2357	52.304	45.5823
AlRepD-2463	Unknown	Unknown	68.9577	85.1116	59.9014	51.0523	0
AlRepD-984	Unknown	Unknown	0	52.0132	51.4207	50.747	103.498
AlRepD-2011	Unknown	Unknown	0	55.7406	45.5442	49.2395	80.1444
AlRepC-32	DNA	hAT	22.752	25.8577	51.7686	48.6419	28.6745
Tc1-5_Xt	DNA	TcMar-Tc1	7.28198	50.6756	48.8596	48.5558	112.634
RTE-1_GA	LINE	RTE-BovB	4.60721	21.5522	52.1419	47.8922	68.051
AlRepE-1213	LINE	L2	0	52.2664	46.2642	47.8734	99.7894
AlRepE-737	Unknown	Unknown	0	67.9772	46.6892	47.8265	68.2483
Daphne-27_DRe	LINE	L2	64.4139	82.2177	51.7213	47.0832	4.28752
Penelope-5_XT	LINE	Penelope	8.77428	33.0668	43.0346	46.41	68.8376
AlRepD-987	Unknown	Unknown	20.3995	25.7801	46.3609	46.2507	0
AlRepC-102	DNA	TcMar-Tc1	40.671	52.2934	41.738	46.2003	13.6048
AlRepD-818	Unknown	Unknown	85.8743	80.4995	43.4621	45.7629	0
Polinton-1N1_DR	DNA	Maverick	25.7074	42.176	41.2982	45.6383	37.0482
AlRepD-4606	Unknown	Unknown	11.1139	39.0026	41.4444	45.2127	93.5397
HP_FR2	DNA	DNA	40.5653	35.4021	32.4517	44.8952	0
DNA9-3_DR	DNA	DNA	5.26504	20.225	46.116	44.8374	65.7913
Tc1-1_PM	DNA	TcMar-Tc1	42.317	74.2002	41.39	44.206	70.0713
AlRepC-358	Unknown	Unknown	48.7824	44.0098	42.6345	43.9506	0
AlRepE-385	Unknown	Unknown	43.6397	49.1128	39.9561	43.2536	3.10072
AlRepA-51	Unknown	Unknown	2.12236	28.5122	38.176	43.2282	103.956
TC1DR3B	DNA	DNA	6.05326	6.19625	40.2218	42.9101	75.7293
AlRepD-1787	Unknown	Unknown	26.2369	31.6659	38.5286	41.7755	18.8373
AlRepC-847	Unknown	Unknown	4.34729	27.4318	42.1704	40.9108	83.0032
AlRepC-1114	DNA	CMC-EnSpm	39.1066	42.2981	37.8385	40.4126	8.5313
AlRepC-2120	DNA	hAT-Ac	7.90673	30.6356	30.5597	40.2577	67.897
AlRepD-337	DNA	TcMar-Tc2	51.1642	76.1782	47.8376	40.1239	42.7435
AlRepB-65	Unknown	Unknown	39.3859	45.7009	34.065	39.915	58.0426
AlRepD-1117	LINE	L2	39.3188	55.3682	34.2411	39.741	7.60963
AlRepD-688	Unknown	Unknown	0	32.6527	37.2402	39.5289	91.4229
Chaplin8_FR	DNA	hAT-Charlie	58.6513	51.1137	32.0936	39.3538	0
AlRepD-528	RC	Helitron	35.5921	49.4973	37.4796	39.2169	2.02458
ERV4_DR-I	LTR	ERV1	0	44.4802	35.3347	38.9931	60.7914
TC1_FR3	DNA	TcMar-Tc1	2.3222	40.4774	37.2318	38.9693	99.7471
AlRepC-1282	DNA	hAT	37.8831	31.0368	35.3281	38.4569	0
Mariner-11_DR	DNA	TcMar-Tc1	9.74583	19.0568	48.2273	37.9984	34.6174
piggyBac-N6_DR	DNA	PiggyBac?	5.68056	24.7773	31.5631	37.7992	60.4938
AlRepE-1026	Unknown	Unknown	15.5295	23.4721	37.2959	37.6343	79.4098
AlRepD-287	Unknown	Unknown	54.5991	63.6734	41.2456	37.4996	4.31451
AlRepC-144	LINE	Penelope	2.27142	27.652	32.3119	36.2787	71.5707
AlRepC-905	Unknown	Unknown	5.48813	34.196	34.3384	35.764	81.3634
AlRepC-270	Unknown	Unknown	92.005	95.4207	33.017	35.6964	7.93082
AlRepB-13	LTR	Ngaro	5.17635	23.8962	38.2574	35.6703	60.0643
AlRepD-1209	LINE	L2	29.5764	31.6044	37.0736	35.4817	0
ERV13_MD_I-int	LTR	ERV1	5.70622	16.5871	37.1798	35.4335	24.1228
AlRepE-993	Unknown	Unknown	0	23.0423	30.3295	35.4167	79.8387
hAT-N97_DR	DNA	hAT-Ac	4.08124	15.7016	40.7845	35.2789	45.9001
AlRepC-2154	DNA	hAT-Ac	26.0876	36.2444	40.7869	35.1558	11.2693
SINE2-1_GA	SINE	MIR	10.1016	18.649	39.2164	34.6263	61.7802
AlRepD-3818	Unknown	Unknown	16.1631	31.0209	32.0581	34.6015	27.1277
AlRepC-1508	DNA	hAT-Charlie	17.8617	34.263	35.329	34.3194	36.2433
AlRepC-65	DNA	PIF-Harbinger	7.67471	13.923	24.1303	34.1059	54.0231
L2-45_DR	LINE	L2	2.99623	13.2264	32.7265	34.1033	68.8213
TC1_FR2	DNA	TcMar-Tc1	6.26768	31.6369	33.2597	34.0759	83.024
AlRepD-880	Unknown	Unknown	0	10.7396	33.6171	33.6053	58.2453
AlRepD-487	DNA	hAT-Ac	24.8109	27.7411	32.8659	33.2256	4.30747
AlRepD-573	Unknown	Unknown	10.7782	21.4839	30.8336	33.0151	59.1887
AlRepA-208	DNA	hAT-Charlie	7.90543	26.006	29.309	32.708	69.6255
AlRepC-1298	Unknown	Unknown	4.98763	21.3733	33.0861	32.6507	43.2405
AlRepD-79	DNA	TcMar-Tc1	39.8856	48.8558	31.4122	31.4036	9.17136
Harbinger-N16_DR	DNA	PIF-Harbinger	24.3887	48.1267	35.0182	30.7384	28.4751
CR1-25_CQ	LINE	CR1	0	20.6391	29.8159	30.4096	50.138
AlRepC-1547	LINE	L2	52.6178	53.743	40.4839	29.7161	0
Bridge1_TN	LINE	Penelope	14.7312	20.9295	29.5309	29.4221	28.2524
AlRepD-192	Unknown	Unknown	0	29.1288	29.2652	29.3752	66.5319
AlRepD-1055	LTR	ERV1	7.72357	11.9196	24.9913	29.3725	19.2301
AlRepC-394	DNA	hAT-Tol2	9.87028	20.9883	27.622	29.2497	73.4542
AlRepD-2251	DNA	Dada	2.1796	27.0994	24.2873	29.2349	70.1437
AlRepD-383	Unknown	Unknown	25.083	17.2854	30.9978	28.3721	7.65685
REX1-6_XT	LINE	Rex-Babar	19.4421	23.5917	30.4574	28.2034	6.55152
AlRepB-392	DNA	hAT-Charlie	32.5931	55.3939	18.1935	28.1107	29.3044
AlRepE-174	LTR	ERV1	16.0758	33.5416	29.9933	28.1017	18.6849
Helitron-2_DR	RC	Helitron	17.6813	33.3407	25.1683	28.0239	58.0517
AlRepC-2318	Unknown	Unknown	11.4415	29.9186	46.6709	27.4909	29.5864
HEROFr	LINE	R2-Hero	2.16871	2.15112	29.1088	27.2337	6.60608
AlRepA-297	Unknown	Unknown	30.0506	31.8759	33.442	26.8924	41.8327
HE1_MM	SINE	tRNA-V-CR1	0	25.9259	25.6799	26.8166	40.9345
DNA-X-16_DR	DNA	DNA	2.00651	14.0587	22.3286	26.6471	53.5738
AlRepD-325	Unknown	Unknown	6.70471	11.2856	27.4267	26.5797	34.5452
AlRepC-53	Unknown	Unknown	36.5514	44.6644	21.802	26.5693	0
AlRepD-8121	LINE	L2	4.29397	2.93992	20.8858	26.5243	43.5718
hAT-N127_DR	DNA	hAT-Charlie	5.57554	13.2544	33.3234	26.4767	37.6777
AlRepD-1230	Unknown	Unknown	28.6031	35.9394	23.1272	26.1943	0
AlRepD-2440	Unknown	Unknown	4.82244	6.7598	22.1104	26.1162	8.92961
ERV1-1-I_DR	LTR	ERV1	2.40299	16.4302	28.2181	25.9847	39.7078
DNA2-16_DR	DNA	DNA	0	18.2956	18.376	25.9	43.6414
EXPANDER1_DR	LINE	RTE	5.39082	26.075	28.0918	25.6153	39.371
AlRepC-1720	Unknown	Unknown	23.8439	28.2473	27.6999	25.6048	7.16616
AlRepE-3612	Unknown	Unknown	2.32572	22.4617	24.0781	25.5088	53.1873
AlRepB-11	DNA	DNA	57.5366	59.9185	20.429	25.4149	30.3197
hAT-N93_DR	DNA	hAT-Ac	9.17019	7.45789	24.3096	25.3297	0
AlRepC-625	DNA	TcMar-Tc2	19.5796	20.2463	20.3181	25.1855	11.1621
AlRepC-891	LINE	L1	24.3844	17.2071	24.8917	25.1462	2.02181
AlRepC-513	DNA	PIF-ISL2EU	46.4956	34.3358	29.7462	24.9042	11.4459
AlRepD-1010	Unknown	Unknown	25.2955	31.0452	25.5652	24.7097	14.639
AlRepC-373	Unknown	Unknown	2.34206	21.5458	25.9231	24.5966	63.1221
AlRepD-1357	Unknown	Unknown	20.2574	28.1844	22.4224	24.567	6.71587
AlRepD-991	Unknown	Unknown	15.319	12.1104	15.0884	24.4778	6.50768
Rex1-31_DRe	LINE	Rex-Babar	34.4701	31.5961	25.1397	24.4559	12.6929
Gypsy-30_GA-I	LTR	ERV1	0	8.98414	22.2532	24.3443	25.5479
DNA8-10_DR	DNA	hAT-Ac	9.79408	23.7765	18.4686	24.2965	33.1037
AlRepB-517	DNA	TcMar-Tc1	4.16768	15.4167	27.416	24.2793	43.8083
AlRepD-326	Unknown	Unknown	25.0259	39.3397	19.491	23.9046	4.61863
AlRepB-157	Satellite	Satellite	545.895	537.41	39.6868	23.7525	44.3984
Copia-3_GA-I	LTR	Copia	19.347	25.0815	21.1609	23.5337	75.7043
AlRepC-286	DNA	hAT-Ac	10.5511	18.1811	18.7164	23.4889	31.3122
AlRepC-1745	DNA	CMC-EnSpm	17.1191	17.2262	14.548	23.4875	24.3593
AlRepC-312	DNA	TcMar-Tc1	0	29.8654	29.4977	23.4091	63.4099
AlRepD-2135	Unknown	Unknown	16.6833	16.3854	23.448	23.2485	7.37393
Gypsy-29_GA-I	LTR	Gypsy	9.00812	0	14.0808	23.118	0
AlRepD-2923	Unknown	Unknown	24.174	25.528	22.0772	23.0725	4.42834
AlRepD-783	Unknown	Unknown	65.4696	70.2168	17.2273	22.9561	5.28082
Bridge2(Xena)	LINE	Penelope	0	11.0432	23.0946	22.8927	44.9015
AlRepD-1283	LTR	ERV1	10.5713	11.1123	26.9286	22.6704	0
Mariner-5_XT	DNA	TcMar-Tc2	33.2774	35.2822	21.9778	22.5998	0
L2-4_LCh	LINE	LINE	0	9.64581	18.9956	22.5971	29.8257
Rex1-3_FR	LINE	Rex-Babar	5.77952	3.2297	24.4559	22.5628	8.20025
AlRepC-692	Unknown	Unknown	5.06085	18.0339	24.0625	22.5201	50.0474
AlRepB-99	DNA	hAT	35.7402	41.079	15.2599	22.423	37.3928
RTE-2_AFC	LINE	RTE-BovB	14.3675	19.1029	22.4562	22.3246	67.14
AlRepC-43	Unknown	Unknown	37.6606	37.8431	22.69	22.1813	6.23387
Crack-3_DR	LINE	L2	0	27.4743	22.0754	22.1766	38.6197
AlRepC-235	Unknown	Unknown	0	28.0475	22.3057	22.0282	65.2887
AlRepC-4009	Unknown	Unknown	11.4329	5.36295	19.4821	21.7237	0
Gypsy-178_DR-I	LTR	Gypsy	0	16.5213	20.1397	21.5781	35.1887
AlRepD-775	Unknown	Unknown	32.6387	37.5228	22.6491	21.5192	14.2809
SINE_TE	SINE	tRNA-V	0	19.7467	23.1425	21.343	46.6517
AlRepB-180	DNA	hAT-Ac	7.05165	13.229	27.438	20.9039	34.8458
AlRepC-1303	Unknown	Unknown	5.01177	15.6354	16.6355	20.6747	25.0005
AlRepD-6972	Unknown	Unknown	35.0838	32.7946	15.9666	20.5993	0
AlRepC-743	LINE	L2	22.8824	26.984	24.8551	20.5779	38.5031
AlRepB-221	Unknown	Unknown	0	14.9652	21.3727	20.5391	36.8879
AlRepC-2145	DNA	hAT-Ac	0	0	17.7398	20.2818	0
AlRepE-12676	Unknown	Unknown	39.4091	37.042	20.6735	20.0967	0
AlRepE-2572	Unknown	Unknown	4.6376	6.50598	22.2285	19.9473	44.9572
AlRepC-1036	Unknown	Unknown	39.3831	45.9958	18.9174	19.9202	5.74009
AlRepD-2531	Unknown	Unknown	7.10353	15.7457	18.1567	19.7718	14.6499
AlRepB-14	LINE	Rex-Babar	14.3794	28.0042	20.5453	19.7001	23.4819
AlRepB-128	Unknown	Unknown	0	11.934	14.2292	19.655	33.8804
Merlin-1_DR	DNA	Merlin	8.55361	16.9304	18.675	19.5554	25.2186
Helitron-3_DR	RC	Helitron	4.29598	2.54645	26.6616	19.5029	2.94825
AlRepC-2717	LINE	Rex-Babar	2.10694	14.9742	13.1307	19.4722	31.8075
AlRepE-2097	DNA	hAT-Tip100	9.86349	10.9099	10.3908	19.3021	2.32248
AlRepE-233	DNA	DNA	15.4457	18.8517	14.8532	19.299	0
AlRepD-2090	Unknown	Unknown	22.3635	35.995	24.1794	19.1765	49.1406
Kiri-1_DBi	LINE	L2	0	11.5509	18.1475	19.0475	37.7274
AlRepC-457	DNA	hAT-Charlie	19.8651	22.3212	18.3814	18.9107	25.8662
AlRepD-11767	DNA	PiggyBac	27.2747	21.6078	18.1326	18.8878	16.8763
AlRepD-2262	Unknown	Unknown	8.43431	5.03131	24.5993	18.8421	0
AlRepC-13	LINE	Rex-Babar	2.1383	14.7674	19.6158	18.6972	45.6224
L2-1_FR1	LINE	L2	21.0553	18.1629	22.218	18.65	2.22677
AlRepC-300	Unknown	Unknown	36.9885	33.9885	24.0959	18.6053	4.17471
Gypsy-14_PBa-I	LTR	LTR	2.84003	4.91538	20.1347	18.5363	18.1257
hAT-N74_DR	DNA	hAT-Ac	15.123	20.6686	18.1167	18.345	17.3027
AlRepD-3287	DNA	hAT-hAT5	17.4225	14.866	14.8247	18.261	14.4256
AlRepB-200	Unknown	Unknown	0	16.5677	19.6217	18.2505	48.2183
AlRepE-3165	Unknown	Unknown	20.9785	21.4077	21.3505	18.0801	2.38382
AlRepD-2665	LTR	ERV1	10.847	13.2063	21.6604	18.0694	8.66797
AlRepC-753	LINE	Rex-Babar	43.5298	41.4169	19.8086	17.9682	0
AlRepC-580	Unknown	Unknown	5.37374	4.75855	17.8415	17.9568	23.8067
L1-27_DR	LINE	L1	23.718	22.2419	16.1481	17.9125	15.8671
AlRepD-91	Unknown	Unknown	2.20294	8.82737	9.17427	17.7903	39.8625
ONSATB	Satellite	Satellite	2.07607	7.30411	22.414	17.5941	8.40301
Gypsy-1_FR-I	LTR	Gypsy	2.95493	6.01809	24.5812	17.5828	2.49577
AlRepC-308	DNA	TcMar-Tc1	10.231	10.562	9.72265	17.5642	0
Expander2	LINE	RTE	2.47875	18.7421	15.4599	17.543	31.7681
AlRepC-1286	DNA	hAT-Ac	25.7421	34.8451	11.9535	17.4877	9.77121
L2-11_DRe	LINE	L2	0	0	19.8763	17.4072	0
CR1-3_FR	LINE	Rex-Babar	7.22849	16.3922	17.1857	17.0672	20.8545
AlRepD-1833	Unknown	Unknown	6.95649	14.1637	18.9603	17.0401	31.4214
AlRepC-223	LTR	ERV1	14.2431	12.9668	16.5087	16.9615	19.7365
AlRepE-2339	Unknown	Unknown	13.3311	16.8639	15.5057	16.9353	42.5045
AlRepC-61	Unknown	Unknown	0	13.4891	17.7865	16.8792	41.5023
AlRepD-1390	Unknown	Unknown	0	0	17.3707	16.742	12.7152
TE-X-5_DR	Satellite	Satellite	10.0107	8.01146	17.1196	16.5176	11.443
AlRepD-5264	Unknown	Unknown	12.7565	20.2118	11.373	16.5167	6.47566
AlRepE-421	Unknown	Unknown	0	0	16.1798	16.4807	34.2769
AlRepE-4827	Unknown	Unknown	15.223	14.3642	10.2646	16.4315	0
AlRepD-7900	LINE	R2-Hero	2.02983	12.6055	15.0146	16.355	37.4747
AlRepD-253	Unknown	Unknown	25.6576	16.1619	13.9136	16.2593	0
AlRepD-23	LTR	ERVK	14.9589	17.8791	10.6101	16.22	6.56654
AlRepC-73	Unknown	Unknown	7.11237	7.51421	16.4146	16.1922	18.4164
AlRepE-1471	Unknown	Unknown	0	17.5805	16.4645	16.1577	28.7169
AlRepC-505	DNA	hAT-Charlie	5.41253	2.30447	6.8742	16.1303	19.7555
TZF28B	DNA	TcMar-Tc1	5.31581	14.692	15.8512	16.0779	42.4428
AlRepE-2751	Unknown	Unknown	0	14.0252	14.9874	15.9634	38.1155
AlRepD-2553	Unknown	Unknown	7.45755	13.835	6.55859	15.9425	22.4938
AlRepD-288	LINE	L2	27.1186	25.8859	17.349	15.9402	11.2914
Penelope-7_XT	LINE	Penelope	0	2.51373	15.4457	15.9269	32.6276
AlRepD-3229	LTR	ERV1	17.9003	20.8855	17.6278	15.8916	4.38914
AlRepD-1578	Unknown	Unknown	14.8376	21.1655	17.5577	15.6443	0
AlRepD-779	Unknown	Unknown	3.01083	13.0234	14.825	15.567	35.1903
AlRepD-2942	LINE	L2	7.60388	19.3183	9.80488	15.5581	7.14867
Tc1-1_DR	DNA	TcMar-Tc1	0	11.6983	15.313	15.4115	33.3718
RTE-1_AFC	LINE	RTE-BovB	0	14.7155	15.6649	15.4062	35.3025
AlRepE-4385	Unknown	Unknown	42.3618	48.8229	13.8815	15.3999	6.00648
AlRepD-5518	Unknown	Unknown	2.3742	2.31632	14.3541	15.2324	13.9123
AlRepD-1339	DNA	TcMar-Tc2	6.45869	11.5766	11.3663	15.1028	15.9442
AlRepE-5457	Unknown	Unknown	11.6127	18.1506	16.9366	15.0336	29.6917
AlRepC-57	DNA	DNA	0	15.0029	15.6812	14.9614	34.6932
DNA-8-13_DR	DNA	hAT?	0	0	17.4739	14.9383	11.6513
Tc1-6_DR	DNA	TcMar-Tc1	12.4114	13.8451	12.4823	14.8386	19.9634
SINE2-2_DR	SINE	tRNA-Mermaid	2.35376	28.2548	19.6449	14.8056	31.693
AlRepD-756	Unknown	Unknown	0	12.2935	13.5241	14.7443	37.0577
AlRepD-207	Unknown	Unknown	9.61489	9.07427	18.353	14.7041	6.52865
AlRepD-3833	Unknown	Unknown	4.63637	2.32227	11.5088	14.7024	0
AlRepE-684	LTR	Gypsy	11.0693	13.4387	14.82	14.6746	2.03908
hAT-N106_DR	DNA	hAT	9.72939	19.4311	9.12332	14.6345	19.7237
AlRepB-383	DNA	TcMar-Tc1	25.1163	22.3975	6.17376	14.3581	0
AlRepE-1600	LINE	L1-Tx1	6.81095	10.1997	12.4103	14.3474	13.6679
Gypsy-21_GA-I	LTR	Gypsy	4.31345	4.48691	10.615	14.3088	21.7404
AlRepD-6292	DNA	TcMar-Tc1	0	14.3152	14.3788	14.2828	22.5736
Rex1-2_FR	LINE	Rex-Babar	11.7736	14.335	20.1407	14.178	3.2185
AlRepE-2838	DNA	hAT-Tol2	0	17.6493	12.3553	14.0391	26.2914
AlRepD-2293	Unknown	Unknown	11.3211	12.5501	13.2904	14.0004	5.18571
AlRepB-44	DNA	TcMar-Tc1	9.89553	24.2828	17.6207	13.9683	41.5446
DNA9-5_DR	DNA	DNA	2.05426	9.70984	14.7291	13.9487	20.1383
hAT-N53_DR	DNA	hAT-Ac?	2.21777	6.76775	14.0583	13.9422	11.1172
AlRepD-8976	Unknown	Unknown	10.895	6.47067	13.4005	13.8552	4.84839
AlRepD-908	Unknown	Unknown	40.6438	31.1568	15.8655	13.7989	11.9184
AlRepC-911	LINE	Rex-Babar	13.8352	20.8968	16.4466	13.7449	9.43049
AlRepE-60	Unknown	Unknown	26.3653	9.90529	22.7496	13.5881	4.87133
AlRepD-3550	Unknown	Unknown	16.7215	11.6525	11.0943	13.5648	11.0202
Tc1-15_Xt	DNA	TcMar-Tc1	4.20238	10.3039	16.1352	13.459	33.5405
AlRepD-195	Unknown	Unknown	0	8.16737	10.2809	13.3861	7.5494
AlRepC-1946	Unknown	Unknown	4.23338	9.40024	13.6729	13.3048	6.65891
EnSpm-N11_DR	DNA	CMC-EnSpm?	0	13.76	12.3148	13.2407	32.606
AlRepE-1008	Unknown	Unknown	2.23718	4.45696	14.0417	13.193	23.5217
AlRepD-360	Unknown	Unknown	0	13.0251	10.8409	13.1704	24.4587
Polinton-2_DR	DNA	Maverick	4.40756	5.61027	11.2171	13.1598	12.1359
AlRepC-1638	Unknown	Unknown	15.1813	11.1276	15.1476	13.1456	4.87159
EnSpm-14_DR	DNA	CMC-EnSpm	0	6.94825	10.5405	13.1333	8.64946
AlRepD-1713	SINE	tRNA-Core	4.34313	0	17.4455	13.1128	29.6479
AlRepD-3184	DNA	hAT	24.3653	22.3016	22.4191	13.0833	14.4575
L2-43_DR	LINE	L2	2.06149	13.9361	10.1017	13.0026	28.6572
AlRepE-2341	LINE	L2	12.0104	21.0633	7.04485	12.9446	18.0509
AlRepB-773	DNA	hAT-Charlie	16.3012	25.6799	14.8708	12.8219	15.6181
AlRepE-4155	Unknown	Unknown	2.24119	4.77251	13.5871	12.7756	30.4039
Gypsy-201_DR-I	LTR	Gypsy	0	0	16.8453	12.7657	68.6334
AlRepD-2080	LINE	L2	2.30436	9.5391	7.5232	12.7622	26.8544
AlRepC-234	DNA	hAT	26.6649	23.2177	18.0549	12.7386	12.1335
AlRepE-5054	Unknown	Unknown	2.43116	5.9858	13.1421	12.7314	11.3008
AlRepD-1793	Unknown	Unknown	0	10.7483	10.1805	12.6329	28.6108
AlRepD-3252	DNA	DNA	2.15318	10.7527	10.2391	12.6117	20.6354
AlRepE-2666	Unknown	Unknown	12.3496	15.1866	10.7327	12.4961	0
AlRepC-1568	Unknown	Unknown	2.47413	19.4641	10.7489	12.2781	27.8053
AlRepC-549	Unknown	Unknown	12.7606	12.2068	24.6476	12.2012	26.2758
EnSpm-16_DR	DNA	CMC-EnSpm	2.56447	11.1035	15.1422	12.1977	22.7876
AlRepE-1478	DNA	CMC-EnSpm	41.6606	34.2074	7.77154	11.9992	0
AlRepD-1887	Unknown	Unknown	18.2611	24.3298	15.1747	11.9098	2.01357
AlRepD-2769	DNA	CMC-EnSpm	17.9944	12.8909	10.101	11.8027	4.39378
IS3EU-3_DR	DNA	IS3EU	0	4.23117	6.51226	11.7241	0
Gypsy92-I_DR	LTR	Gypsy	18.1278	12.3903	8.352	11.6476	5.4715
DNA-8-18_DR	DNA	hAT	9.53099	11.291	9.63269	11.6248	11.6778
AlRepC-238	LINE	Rex-Babar	5.28819	5.2339	13.0341	11.6113	0
AlRepC-345	LTR	Gypsy	2.63879	2.19836	12.1784	11.5666	3.69146
L2-16_DRe	LINE	Rex-Babar	15.4194	16.4852	9.47765	11.5157	5.69986
AlRepC-488	DNA	DNA	11.5355	5.9491	15.7661	11.4756	23.9112
AlRepC-1227	Unknown	Unknown	2.3223	8.37903	13.896	11.4609	22.4898
hAT-N144_DR	DNA	hAT?	5.10983	2.64536	9.40279	11.4094	22.994
AlRepA-485	SINE	tRNA-Core	5.71853	10.2154	9.79413	11.3743	21.757
AlRepC-560	Unknown	Unknown	16.2354	15.1706	13.3703	11.2999	22.9797
CryptonV-2_DR	DNA	Crypton-V	0	9.9481	11.8973	11.2848	25.9481
AlRepD-242	Unknown	Unknown	16.0749	22.5801	11.1677	11.2021	2.66711
DNA2c_Lch	DNA	DNA	22.9123	28.6076	9.40338	11.1523	2.39151
AlRepD-1257	LINE	L2	0	0	9.58017	11.1416	14.019
DNA8-21_DR	DNA	Merlin	0	0	9.27978	11.1321	26.4049
AlRepD-94	Unknown	Unknown	59.9708	56.6723	18.9079	11.1247	0
AlRepC-521	Retroposon	Retroposon	0	0	11.1983	11.0888	16.1351
AlRepD-691	LINE	CR1-Zenon	5.4983	15.4841	12.0622	11.0712	11.8536
AlRepC-536	DNA	hAT-Ac	9.5985	18.4997	5.21149	10.9926	2.75127
AlRepD-2645	Unknown	Unknown	0	11.1248	8.69511	10.9444	30.5466
AlRepD-755	Unknown	Unknown	2.47816	8.55524	10.2827	10.9132	15.3587
AlRepD-1783	Unknown	Unknown	29.0046	23.1326	6.88549	10.9123	2.26241
AlRepC-4030	DNA	DNA	0	10.5944	10.1211	10.9037	25.8805
AlRepC-643	Unknown	Unknown	0	7.6399	10.8624	10.863	17.1957
AlRepC-733	DNA	hAT-Ac	11.7524	9.45572	8.18236	10.8194	6.67552
AlRepE-257	DNA	TcMar-ISRm11	4.81438	6.1801	11.7739	10.8098	10.2027
AlRepC-30	DNA	hAT	0	3.04225	9.6041	10.7617	17.0302
SMAR12	DNA	TcMar-Tc2	0	11.169	9.47636	10.7436	20.9081
L1-51_DR	LINE	L1	0	12.362	12.0694	10.644	23.5325
AlRepB-473	DNA	hAT	11.4865	13.2519	10.1988	10.5867	12.2098
AlRepE-488	LINE	Rex-Babar	2.75087	6.24591	10.5098	10.5002	28.5508
TC1_FR4	DNA	TcMar-Tc1	19.4	13.565	14.6976	10.4917	5.43861
AlRepD-1284	LTR	ERV1	2.84573	0	5.5569	10.3462	2.15456
AlRepD-381	DNA	TcMar-Tigger	10.0908	6.44627	2.8618	10.324	9.25654
AlRepD-1672	LINE	L1	2.50149	2.49913	10.8067	10.3205	0
AlRepD-1719	LINE	L2	13.8432	15.0226	7.03493	10.3126	0
AlRepD-2048	Unknown	Unknown	10.4919	2.89611	11.3483	10.2986	26.1825
AlRepC-1119	DNA	hAT-Charlie	0	2.81348	13.0902	10.2978	9.29961
AlRepD-157	Unknown	Unknown	7.31347	15.0791	10.4176	10.2776	6.75482
DNA2-5_DR	DNA	hAT-Ac	9.50523	9.4875	9.13306	10.2207	20.1815
DIRS-8_DR	LTR	Ngaro	0	8.75696	10.0074	10.1825	23.8815
AlRepE-554	Unknown	Unknown	12.2622	14.1823	10.3715	10.1767	8.06176
AlRepB-784	DNA	hAT-Ac	6.3385	9.52439	15.4883	10.1692	8.29482
AlRepD-609	Unknown	Unknown	0	10.5348	11.5625	10.1304	21.7124
AlRepD-5449	Unknown	Unknown	4.14114	8.98876	12.2998	10.0998	13.3659
AlRepD-2509	Unknown	Unknown	0	8.79774	9.75365	10.0327	16.8682
AlRepD-546	Unknown	Unknown	2.29226	12.0658	11.6521	9.99023	28.6019
AlRepB-173	Retroposon	Retroposon	12.5112	11.3004	13.2419	9.92929	11.7848
AlRepD-1832	Unknown	Unknown	0	8.97996	10.2101	9.88587	17.6221
AlRepE-5869	Unknown	Unknown	2.03189	2.41753	6.49992	9.82602	2.08884
AlRepD-6553	Unknown	Unknown	2.9254	5.24937	9.62027	9.82229	2.06469
AlRepC-1121	Unknown	Unknown	6.71501	7.98547	9.19825	9.79853	14.3088
AlRepC-282	Unknown	Unknown	16.8762	10.6605	8.73804	9.79643	31.2638
AlRepD-531	Unknown	Unknown	9.77435	9.0059	7.52358	9.7263	8.5546
TDR3	DNA	hAT-Charlie	4.87232	2.36848	8.51983	9.72125	6.70134
Kolobok-2_XT	DNA	Kolobok-T2	4.53026	5.56635	3.67689	9.70369	15.2984
AlRepC-1255	DNA	PiggyBac	2.71982	9.1715	13.0492	9.70157	12.1956
AlRepC-2165	Unknown	Unknown	0	9.40518	11.1025	9.69976	12.9885
AlRepC-326	Unknown	Unknown	0	8.42904	6.44077	9.69157	24.9872
Tc1-10_Xt	DNA	TcMar-Tc1	14.9441	15.2029	18.4597	9.67981	10.2461
L1-85_DR	LINE	L1-Tx1	2.2529	10.1646	7.65875	9.6645	0
AlRepD-1627	Unknown	Unknown	0	8.55408	8.87441	9.65174	17.2237
MER6	DNA	TcMar-Tigger	2.07521	13.1458	8.57403	9.62068	20.0491
AlRepD-2238	DNA	PIF-Harbinger	0	6.71247	10.0094	9.59866	24.2602
AlRepE-3921	Unknown	Unknown	15.0115	18.3388	10.0532	9.53777	2.13699
LSU-rRNA_Hsa	rRNA	rRNA	19.0902	20.1755	9.03905	9.49903	8.72174
AlRepD-618	Unknown	Unknown	2.87865	2.01615	8.89943	9.45917	0
AlRepD-4584	Unknown	Unknown	0	9.94701	9.01174	9.34978	22.8684
AlRepD-8475	DNA	hAT-Ac	4.4657	6.53445	9.90171	9.34742	6.74173
L1-74_DR	LINE	L1-Tx1	11.2159	13.9408	6.3684	9.2501	2.84035
TguERVK4a_I-int	LTR	ERVK	0	7.15782	8.2097	9.20113	18.9317
Mariner-4_DR	DNA	TcMar-Tc1	3.5004	7.37211	12.8201	9.19963	18.4127
AlRepD-2754	DNA	P	0	0	10.2757	9.13548	0
DNA2-3_DR	DNA	hAT?	0	11.0289	10.9871	9.11897	16.7272
AlRepD-469	Unknown	Unknown	2.54309	3.16387	7.22235	8.96076	0
AlRepD-44	Unknown	Unknown	0	10.3736	7.86896	8.94264	20.2892
DNA8-23_DR	DNA	DNA	0	8.39875	9.33922	8.9331	25.6892
AlRepD-1716	LTR	Gypsy	25.0718	33.0142	12.7812	8.92631	7.71653
L2-46_DR	LINE	L2	0	2.61261	10.3694	8.91344	9.97637
AlRepC-247	Unknown	Unknown	4.23219	3.8939	4.54874	8.89172	18.7049
AlRepD-2848	LINE	L1-Tx1	2.03909	4.96375	9.12569	8.88919	4.17356
AlRepD-1235	Unknown	Unknown	0	3.06063	10.9447	8.88319	17.8034
Tx1-7_DR	LINE	L1-Tx1	0	0	5.17269	8.86431	0
AlRepC-501	LINE	Rex-Babar	9.3196	7.89719	9.32589	8.85492	0
AlRepC-1837	LINE	L2	6.53011	9.80935	7.15832	8.77026	2.50751
RLTR20A4	LTR	ERVK	0	4.47325	5.24074	8.69374	12.1089
AlRepE-3863	LINE	Rex-Babar	4.63907	2.08363	8.25283	8.68956	3.07904
AlRepC-631	DNA	TcMar-Tc1	0	6.31825	6.18028	8.67405	15.0999
Rex1-1_PM	LINE	Rex-Babar	0	2.22718	4.56765	8.65783	0
hAT-N50B_DR	DNA	hAT-Ac	4.03567	11.9197	7.79982	8.52178	21.3556
AlRepD-1181	LINE	L2	2.52312	11.4401	9.96317	8.49413	13.1807
AlRepD-5045	Unknown	Unknown	14.1268	20.6907	10.8234	8.48268	11.2025
CR1-66_HM	LINE	L2	19.4078	22.3293	8.61833	8.46038	0
EnSpm-7_DR	DNA	CMC-EnSpm	0	8.99216	5.69697	8.43736	19.1113
ERV24_Prim-int	LTR	ERV1	0	7.30686	7.68007	8.42269	13.2269
AlRepE-6108	LINE	L2	3.2565	9.82871	7.14458	8.40022	35.757
AlRepD-2583	Unknown	Unknown	0	5.1029	5.41	8.32586	12.0187
AlRepD-4541	LINE	Rex-Babar	11.8486	19.2191	6.60344	8.23365	21.958
AlRepD-2072	LTR	ERV1	2.31327	2.01265	9.5839	8.21329	4.04604
AlRepC-3303	Unknown	Unknown	0	3.64732	7.84682	8.13798	41.6942
EnSpm-2_DR	DNA	CMC-EnSpm	7.24643	4.94635	7.26166	7.96583	3.72453
AlRepC-769	Unknown	Unknown	12.5966	10.0472	7.51094	7.95818	2.16787
AlRepD-210	LTR	DIRS	12.2683	14.6535	18.2511	7.87728	0
AlRepD-1790	Unknown	Unknown	0	0	6.56761	7.8697	4.08749
AlRepC-1433	DNA	hAT-Charlie	4.80255	13.6531	8.61415	7.85699	27.4096
CR1-22_DR	LINE	L2	2.5986	4.10494	8.77608	7.82646	14.6505
AlRepD-4002	Unknown	Unknown	0	8.19793	7.65094	7.80695	16.6495
AlRepD-3030	Unknown	Unknown	0	7.82854	7.14839	7.78876	12.0646
AlRepE-1139	Unknown	Unknown	5.23155	7.66606	10.5596	7.76333	2.00136
Penelope-1_DR	LINE	Penelope	0	0	5.37403	7.754	6.1587
AlRepD-992	LINE	L1	8.78636	7.34698	9.31663	7.74261	7.08785
AlRepE-1229	DNA	TcMar-Tc1	2.09895	4.44077	6.48779	7.70309	11.4961
HERVIP10B3-int	LTR	ERV1	0	4.29784	6.757	7.64061	19.5723
L2-8_NVi	LINE	L2	0	6.39303	8.78483	7.4831	23.6479
Sola1-2_AC	DNA	Sola	9.75338	4.94927	4.46002	7.40322	6.79802
AlRepD-392	Unknown	Unknown	7.38516	16.3924	8.51214	7.38769	5.71596
AlRepE-2127	Unknown	Unknown	0	6.3574	9.41293	7.35264	17.9266
AlRepD-3364	RC	Helitron	0	5.74512	7.28508	7.34027	16.6386
Mariner-17_AEc	DNA	DNA	0	6.67489	6.66751	7.32534	11.294
hAT-47_HM	DNA	hAT-Tip100	15.103	10.9698	12.9543	7.31106	0
AlRepC-146	DNA	hAT-Ac	16.7239	15.9675	8.01324	7.30427	24.761
SWIMMER1	LINE	L1	0	13.9577	2.54611	7.28158	31.4384
AlRepC-754	DNA	DNA	0	5.62214	7.15078	7.27492	14.59
AlRepD-1590	Unknown	Unknown	4.87164	0	7.17733	7.23149	4.79997
AlRepB-767	Unknown	Unknown	25.1297	18.1592	7.35831	7.22348	8.09295
Daphne-18_HM	LINE	L2	0	2.18551	9.59951	7.12311	7.64161
AlRepD-347	Unknown	Unknown	0	2.0178	8.38036	7.05221	15.6373
hAT-14_HM	DNA	hAT-Ac	5.44047	2.78836	4.47369	7.011	0
L2-42_DRe	LINE	L2	0	2.52207	6.87058	6.9809	3.81867
AlRepB-964	DNA	hAT-Tip100	4.59478	9.37579	13.7896	6.97663	12.6577
Chap3a_Cis	DNA	hAT-Charlie	0	8.11792	6.02529	6.95124	14.937
hAT-N47B_DR	DNA	hAT?	2.60062	4.72134	4.45436	6.90027	0
AlRepE-1257	Unknown	Unknown	2.37127	4.81919	7.17539	6.88196	6.73452
AlRepE-305	Unknown	Unknown	2.13834	2.37429	6.52984	6.82363	0
AlRepC-1442	DNA	hAT-Ac	12.0424	20.6268	8.96971	6.81599	0
DNA8-4A_DR	DNA	hAT-Charlie	2.78564	3.78893	6.12463	6.792	19.4005
AlRepC-1068	DNA	hAT-Tip100	2.65107	2.7253	7.32841	6.77026	9.05614
AlRepC-1270	Unknown	Unknown	2.22464	9.21541	6.26136	6.75951	17.8252
AlRepD-808	DNA	PIF-Harbinger	13.6016	5.21017	10.7879	6.74606	0
ERV40_MD_I-int	LTR	ERV1	0	3.1171	6.77228	6.72107	9.35265
Ronin2_I-int	LTR	Gypsy	2.11108	2.03961	6.58485	6.68555	2.22666
AlRepC-299	Unknown	Unknown	9.13766	16.1429	4.4009	6.68224	0
AlRepE-50	Unknown	Unknown	6.72232	14.4006	7.8764	6.67677	9.4195
AlRepD-1474	Unknown	Unknown	0	5.62015	5.58919	6.63722	9.25522
MacERV4_int-int	LTR	ERVK	0	5.35369	5.24934	6.60129	12.4511
AlRepD-2015	Unknown	Unknown	4.58502	11.6614	14.9874	6.5856	6.33811
ERV1-1-I_Lch	LTR	LTR	0	5.46271	8.23738	6.57758	10.7315
AlRepC-1543	DNA	IS3EU	20.8467	25.2249	9.03597	6.55952	11.3352
AlRepD-762	Unknown	Unknown	2.84773	0	0	6.5554	0
AlRepD-3491	DNA	Sola	2.26552	2.42301	8.86174	6.49258	11.2341
AlRepD-1017	DNA	DNA	0	0	6.29803	6.47189	10.0681
AlRepD-974	Unknown	Unknown	0	10.2327	9.18029	6.45424	15.3114
AlRepD-5194	SINE	MIR	2.10915	4.13732	4.64057	6.37988	13.0531
AlRepC-212	Unknown	Unknown	0	6.34739	6.88128	6.36652	27.1147
DNA-8-34_DR	DNA	hAT-Tip100	0	2.22216	5.5072	6.33596	8.30216
AlRepD-382	DNA	DNA	7.84807	6.67622	4.69111	6.30617	16.843
AlRepC-159	LINE	L2	8.17024	6.74029	5.95548	6.29778	0
ENSPM-6_DR	DNA	CMC-EnSpm	2.38242	5.38181	8.13308	6.27993	24.9487
AlRepC-1432	Unknown	Unknown	2.00082	0	4.34563	6.27877	0
EnSpm-1_PM	DNA	CMC-EnSpm	0	4.84399	4.2434	6.2769	10.185
AlRepE-1530	Unknown	Unknown	11.8396	10.2488	11.9375	6.2758	0
AlRepD-3916	Unknown	Unknown	3.54176	5.06332	5.61874	6.26632	0
AlRepC-1293	Unknown	Unknown	2.6985	2.54537	4.19505	6.25088	6.6502
DNA-8-3_DR	DNA	DNA	0	6.98499	6.51879	6.18876	16.5671
AlRepC-532	DNA	hAT	17.7689	13.5632	2.72624	6.18076	2.3124
TguLTRL1_I	LTR	ERVL	0	5.40236	6.42992	6.10181	7.35191
AlRepD-2676	DNA	TcMar-Tc2	5.88354	2.01366	6.62176	6.08698	2.34828
AlRepC-71	Unknown	Unknown	0	2.20696	5.64999	6.07879	4.92101
AlRepD-1389	Unknown	Unknown	0	4.77957	7.55898	6.02076	17.2722
Ginger1-1_AC	DNA	Ginger	0	0	5.24837	5.9968	3.98667
AlRepD-2481	Unknown	Unknown	4.24419	8.79219	5.10631	5.94929	9.80643
Daphne-24_HMa	LINE	L2	0	0	5.48673	5.92676	0
BEL5-I_DR	LTR	Pao	3.52484	6.43735	7.33163	5.90081	8.50403
AlRepD-1738	Unknown	Unknown	0	6.11386	7.78651	5.89791	19.6753
AlRepD-1353	DNA	PiggyBac	0	2.34097	5.20094	5.77524	2.13639
hAT-6B_PM	DNA	hAT-Charlie	7.52628	7.01999	4.51139	5.75596	0
Tx1-38_DR	LINE	L1-Tx1	8.86859	8.14513	3.27014	5.75477	3.65109
AlRepD-2695	Unknown	Unknown	0	7.12982	5.65613	5.74408	16.1693
Tc1-8_Xt	DNA	TcMar-Tc1	2.19535	0	2.7081	5.71931	6.48572
EnSpm-1_HM	DNA	CMC-EnSpm	2.66221	6.87764	8.94631	5.71343	7.32342
L1-70_DR	LINE	L1-Tx1	8.58566	5.18571	5.31849	5.70578	2.05177
Academ-1_GA	DNA	Academ	0	2.12711	3.80771	5.69662	4.63093
Polinton-1_CPB	DNA	Maverick	2.64793	2.84582	5.38	5.68071	0
hAT-11_LCh	DNA	DNA	21.3563	16.6661	6.17865	5.65207	6.64588
AlRepE-5440	LINE	L1	2.63379	2.44207	6.34069	5.62523	0
AlRepB-45	SINE	SINE	12.9367	15.4318	4.27251	5.59799	13.2092
L2-51_DR	LINE	L2	2.3253	4.89062	5.50916	5.53752	0
tRNA-1_DRe	Satellite	Satellite	0	0	4.75904	5.51907	2.0181
AlRepB-269	Unknown	Unknown	7.18685	2.71027	4.942	5.48899	2.07527
SINE3_AFC	SINE	tRNA-Mermaid	2.01375	2.20378	5.25366	5.48767	2.19317
Harbinger-1_GA	DNA	PIF-Harbinger	10.8677	12.9842	8.15262	5.47364	0
L2-34_DR	LINE	L2	0	4.11354	5.53353	5.47148	10.1958
DNA8-12_CB	DNA	DNA	0	0	5.08461	5.42514	7.62968
L1-67_DR	LINE	L1	0	2.19485	6.63513	5.41642	0
AlRepC-213	DNA	DNA	0	2.67017	4.94681	5.37113	11.2492
Mariner-7_XT	DNA	DNA	6.86052	7.01089	5.29588	5.35793	2.23813
Mariner-N3_DR	DNA	CMC-EnSpm?	0	5.60602	4.59815	5.34006	5.75252
EnSpm-N10_DR	DNA	CMC-EnSpm	2.04249	3.81755	4.33232	5.33138	4.20643
AlRepC-1586	Unknown	Unknown	0	7.88985	6.03631	5.32725	12.8366
AlRepD-873	Unknown	Unknown	2.42315	2.96272	7.87999	5.30997	4.61312
AlRepE-134	DNA	DNA	6.2354	3.04641	3.32479	5.30896	3.82398
DNA-N4_DR	DNA	DNA	0	4.61327	4.90542	5.30849	18.8612
Mariner-N14_DR	DNA	TcMar-Tigger	0	2.78816	4.98862	5.27765	11.2442
REX1-2_DR	LINE	Rex-Babar	0	3.52515	3.18706	5.2691	11.8406
L1-108_DR	LINE	L1	0	2.7473	5.90151	5.26856	4.74331
AlRepE-2431	Unknown	Unknown	9.68193	6.84479	3.80879	5.22265	0
EnSpm-19_DR	DNA	CMC-EnSpm	0	2.06844	2.72653	5.19494	0
AlRepD-1254	DNA	hAT-Ac	5.68886	0	7.32814	5.18773	0
AlRepE-1854	DNA	TcMar-Tc2	0	0	5.82893	5.17018	0
AlRepC-558	DNA	TcMar-Fot1	10.9285	12.6569	14.4338	5.16798	0
Mariner-1_SP	DNA	TcMar-Fot1	0	0	2.48264	5.15821	12.4929
AlRepD-2779	DNA	hAT-Ac	3.50721	0	3.41762	5.14831	2.87724
AlRepE-6137	Unknown	Unknown	0	4.71885	5.0863	5.14117	18.7135
Harbinger-1_DR	DNA	PIF-Harbinger	4.78446	8.2364	5.32245	5.12726	0
Helitron-N1_PBa	DNA	DNA	2.00597	4.68574	5.24889	5.10523	11.0586
AlRepC-1083	DNA	hAT-Tip100	4.7217	4.39913	2.69269	5.09963	5.1785
Tc1-7_DR	DNA	TcMar-Tc1	0	2.76308	5.4607	5.08797	13.9366
L1-43_DR	LINE	L1	5.87989	3.18041	4.49423	5.08648	2.04142
AlRepD-2057	LINE	L2	7.10296	5.43086	4.34854	5.03266	8.80801
Helitron-N21_CGi	RC	Helitron	8.74175	4.43786	4.22941	5.02341	4.32978
L2-7_DRe	LINE	L2	2.6644	3.91615	3.14698	5.01818	0
AlRepE-294	Unknown	Unknown	0	4.37919	4.66521	5.01288	14.4781
L2-17_DRe	LINE	L2	0	3.02429	2.47674	5.00521	13.1485
AlRepE-4191	Unknown	Unknown	0	2.27684	4.95124	4.98421	18.8006
AlRepB-136	Unknown	Unknown	2.00607	2.10969	4.66637	4.96583	11.5521
EnSpm-15_DR	DNA	CMC-EnSpm	6.21099	13.9408	4.57407	4.95637	7.13104
AlRepE-819	Unknown	Unknown	24.1135	7.69964	4.42452	4.94604	8.1342
Furousha2	DNA	hAT-Ac	0	0	5.15155	4.93886	0
hAT-6_GA	DNA	hAT-Charlie	5.76268	7.54715	4.83515	4.90982	11.4484
AlRepE-199	Unknown	Unknown	4.0612	5.0019	4.57829	4.88557	18.6639
AlRepE-3325	Unknown	Unknown	0	2.15465	5.20691	4.85449	2.08257
Mariner-14_LCh	DNA	DNA	0	4.39264	3.48709	4.80822	10.0984
AlRepD-486	SINE	SINE	7.55737	7.57398	7.0801	4.79572	4.6786
AlRepC-959	DNA	hAT-Ac	5.14839	6.57886	8.87481	4.78388	0
AlRepE-6122	Unknown	Unknown	2.01866	4.3696	5.08376	4.77696	3.74345
Tc1-4_DR	DNA	TcMar-Tc1	2.69414	8.13053	6.45126	4.76465	8.87284
CR1-7_SP	LINE	L2	0	0	4.43107	4.75794	0
AlRepE-6153	Unknown	Unknown	5.76238	5.6209	6.80492	4.75064	0
hAT-2n1_DR	DNA	hAT-Charlie	0	4.21251	3.58647	4.74402	7.16706
DIRS1_FR	LTR	DIRS	7.15431	9.83352	7.06879	4.73387	7.74413
AlRepC-1084	LINE	Rex-Babar	3.07077	0	5.54319	4.73337	2.59344
ERV1-3-I_DR	LTR	ERV1	9.0977	7.27941	5.40467	4.70143	2.05864
ERV1-1_LCh-I	LTR	LTR	0	4.54442	4.41155	4.69528	11.1978
AlRepC-895	DNA	TcMar-Tc1	2.47826	10.3944	7.62097	4.68163	17.6793
HelitronY1_CE	RC	Helitron	0	0	4.4689	4.68	5.72183
AlRepE-528	Unknown	Unknown	3.50571	0	5.15066	4.67389	0
L2-41_DRe	LINE	L2	10.0458	11.583	10.3439	4.67249	0
DIRS-1F-LTR_DR	LTR	Ngaro	0	0	2.27161	4.66226	7.0973
AlRepC-22	Unknown	Unknown	0	5.35712	6.8068	4.6547	22.7642
AlRepD-134	Unknown	Unknown	5.09968	5.29016	16.6487	4.62263	23.3986
RTE-11_SP	LINE	RTE-BovB	0	0	3.6827	4.59109	3.85614
AlRepC-91	DNA	TcMar-Tc2	2.37476	6.47566	9.48488	4.54896	0
Gypsy-17-I_DR	LTR	Gypsy	2.03116	2.12588	2.15644	4.54564	16.301
Tx1-3_DR	LINE	L1-Tx1	0	0	5.34858	4.53291	0
TZSAT	Satellite	Satellite	181.04	177.246	4.73239	4.51706	6.8609
AlRepD-1554	LINE	L2	0	0	6.08133	4.49879	0
AlRepD-1005	Unknown	Unknown	0	2.78125	2.2985	4.49219	3.13486
hAT-2_LCh	DNA	DNA	0	0	10.1452	4.49184	0
AlRepD-1221	LINE	Rex-Babar	0	0	7.09617	4.48211	7.90525
hAT-8_DR	DNA	hAT-Tip100	0	0	3.01746	4.48157	2.65175
AlRepD-1895	Unknown	Unknown	10.2551	6.9308	4.79519	4.47701	7.01698
EnSpm-9_DR	DNA	CMC-EnSpm	9.56586	4.87678	6.54544	4.46678	5.74437
AlRepD-1024	Unknown	Unknown	10.4257	14.4552	2.08165	4.46402	12.5891
Gypsy-42_GA-I	LTR	Gypsy	8.44487	5.65682	6.81199	4.43776	2.51437
CR1-52_BF	LINE	CR1-Zenon	0	4.27059	3.29993	4.42577	7.65634
AlRepD-29	Unknown	Unknown	2.2701	2.02383	2.13851	4.40617	0
AlRepE-3388	Unknown	Unknown	3.59052	5.66626	4.76908	4.40387	2.49798
AlRepC-800	LTR	LTR	3.02208	9.44035	4.55224	4.40159	6.77387
AlRepD-2838	Unknown	Unknown	0	4.23685	3.56173	4.39752	6.79764
DNA-2-20_DR	DNA	CMC-EnSpm	0	0	0	4.37269	0
DNA7-N2_DR	DNA	hAT-hAT6	0	0	4.99588	4.364	4.211
AlRepD-837	DNA	TcMar-Tc1	0	3.71604	4.07239	4.36249	8.90258
AlRepC-1646	DNA	hAT	5.96827	7.12685	2.07418	4.34927	2.44124
AlRepB-160	LINE	L2	2.03551	0	2.15028	4.34445	2.18634
AlRepE-1831	Unknown	Unknown	3.36115	3.20714	2.11486	4.33414	0
AlRepD-280	Unknown	Unknown	2.34711	2.14157	0	4.31889	0
Gypsy-5_GA-I	LTR	Gypsy	0	0	4.18836	4.30676	0
AlRepD-2178	Unknown	Unknown	5.25817	5.82573	2.14563	4.29769	0
AlRepD-4496	Unknown	Unknown	0	0	4.39067	4.29354	0
AlRepC-659	Unknown	Unknown	2.17675	0	2.1597	4.28543	4.31722
AlRepD-1103	Unknown	Unknown	0	0	0	4.28517	2.08998
L1-54_XT	LINE	L1	0	0	3.49197	4.28183	0
AlRepD-2443	Unknown	Unknown	2.15201	2.09409	0	4.27948	4.78299
AlRepE-715	Unknown	Unknown	2.63912	3.24436	0	4.27238	0
Gypsy120-I_DR	LTR	Gypsy	0	0	2.04036	4.26027	0
AlRepD-2663	LINE	L2	4.82978	3.3444	7.65452	4.24372	2.61702
DNA15TA1_DR	DNA	CMC-EnSpm	0	3.41783	3.52625	4.24047	5.91112
AlRepD-519	Unknown	Unknown	5.48567	2.14998	2.0787	4.22684	2.25331
AlRepE-7227	Unknown	Unknown	7.0157	10.047	4.60519	4.22494	4.64108
AlRepD-657	DNA	hAT-Tol2	6.73788	0	2.83683	4.21676	10.3203
AlRepE-42	Unknown	Unknown	0	0	6.75205	4.20857	2.23762
AlRepB-185	DNA	DNA	18.2209	4.54761	2.51876	4.20542	28.8115
DNAX-24B_DR	DNA	DNA	0	0	0	4.1987	4.38466
AlRepD-2186	Unknown	Unknown	2.56298	8.53024	2.01918	4.19042	4.42514
LOOPERN6_DR	DNA	PiggyBac?	4.15689	7.97921	2.33181	4.1898	0
AlRepD-6835	Unknown	Unknown	2.0687	4.05402	4.55462	4.18872	12.9672
MIR_Aves2	SINE	MIR	3.1551	12.6792	3.90399	4.17933	4.31656
AlRepD-697	DNA	hAT-Blackjack	2.07916	9.53087	3.87049	4.16861	6.30376
Gypsy-14-I_DR	LTR	Gypsy	0	0	2.09628	4.15615	4.33088
AlRepC-169	Unknown	Unknown	20.3494	18.5604	6.54257	4.15593	8.93356
AlRepD-491	Unknown	Unknown	2.35735	2.42431	0	4.15361	6.48897
AlRepC-968	Unknown	Unknown	2.73133	0	0	4.14846	3.48691
hAT-9_DR	DNA	hAT-Charlie	0	2.39356	4.14032	4.11255	2.50398
hAT-N44_DR	DNA	hAT-Tip100	6.02949	7.98555	2.1276	4.09442	0
REX1-7_DR	LINE	Rex-Babar	3.9462	7.08914	6.54417	4.08643	0
AlRepD-1307	LTR	Pao	2.32275	13.765	4.60538	4.07686	40.1894
IS3EU-4_DR	DNA	IS3EU	0	0	2.18099	4.05365	0
ERV1-N7-I_DR	LTR	ERV1	0	0	5.29226	4.04596	2.21106
AlRepD-6317	Unknown	Unknown	0	2.34698	4.66448	4.03552	9.30369
AlRepD-2705	Unknown	Unknown	2.08444	0	0	4.02525	0
AlRepC-128	DNA	hAT	2.42774	3.57621	3.71404	4.02319	5.62877
RMER6-int	LTR	ERVK	0	4.46141	3.91184	4.00018	8.80546
DNA-8-9_DR	DNA	hAT-Ac?	2.14629	4.55168	4.0248	3.97771	4.83471
AlRepD-183	DNA	DNA	0	3.97626	4.48313	3.95088	7.43294
AlRepE-1352	Unknown	Unknown	0	2.94039	3.44123	3.94646	9.58965
AlRepD-440	Unknown	Unknown	0	3.09313	3.23433	3.94044	7.4946
Gypsy-16-I_DR	LTR	Gypsy	0	0	3.40575	3.89667	7.59147
DNA-8-31_DR	DNA	DNA	0	3.59241	3.84013	3.87637	6.3077
AlRepC-1878	DNA	DNA	2.06584	3.58524	8.70166	3.8572	11.2336
Nimb-3_DR	LINE	I	0	3.79456	3.09019	3.80545	5.50106
ERV1-1B_DR-I	LTR	ERV1	0	3.60984	3.47547	3.79229	6.90914
TE-X-4_DR	Unknown	Unknown	2.45217	2.12584	3.62314	3.7806	2.04927
MuDr-3_HM	DNA	MULE-MuDR	0	5.05757	3.55433	3.72397	5.47682
NOF_FB	DNA	MULE-NOF	0	3.13985	3.51965	3.70492	6.81602
AlRepB-569	Unknown	Unknown	2.00491	7.46918	5.05529	3.66755	7.8376
AlRepD-412	Unknown	Unknown	0	4.36852	5.93169	3.63661	0
Mariner-1_DR	DNA	TcMar-Tc1	0	3.30831	3.32461	3.57637	6.01927
EnSpm-15_HM	DNA	CMC-EnSpm	0	0	2.98727	3.57544	0
Gypsy65-I_DR	LTR	Gypsy	0	0	3.96381	3.57259	2.37258
Poseidon-2C_PM	LINE	Penelope	5.86065	2.43767	4.01642	3.54712	4.61335
Gypsy-53_PM-LTR	LTR	Gypsy	0	2.96617	3.06575	3.54709	0
AlRepD-5020	DNA	hAT-Ac	0	3.59008	3.22206	3.54139	14.0366
LTR-522_AMi	LTR	Gypsy	0	2.20975	2.85126	3.53612	6.67024
AlRepD-763	DNA	TcMar-ISRm11	0	0	3.61241	3.51299	0
LONGPAL1	DNA	MULE-MuDR	0	3.27268	2.78275	3.50659	6.2902
AlRepC-162	SINE	MIR	0	2.79412	3.1649	3.50518	20.6369
Gypsy36-I_AG	LTR	Gypsy	0	0	2.8134	3.50253	0
Jockey-3_DT	LINE	Jockey	0	2.1451	3.39755	3.46518	8.42256
hAT-N46_DR	DNA	hAT-Tip100	0	0	3.46236	3.43302	0
CR1-115_AAe	LINE	CR1	0	2.20632	2.90461	3.40974	11.3129
DNA-8-27_DR	DNA	hAT-Ac?	0	2.59646	2.33063	3.40439	3.67532
AlRepD-12292	Unknown	Unknown	2.0091	2.26735	7.94015	3.37646	0
Harbinger-2N1_DR	DNA	PIF-Harbinger	0	3.12767	2.812	3.32891	4.71179
FRAM	SINE	Alu	0	0	2.17465	3.32321	0
AlRepD-214	Unknown	Unknown	0	5.90188	5.5374	3.31516	23.6788
Dada-U6_DR	DNA	Dada	2.27693	0	2.64635	3.30812	2.97926
AlRepB-351	DNA	TcMar-Tc1	11.9479	5.9033	2.58725	3.29169	12.2522
AlRepC-736	DNA	PIF-Harbinger	0	3.64343	5.47742	3.28973	10.0532
Chapaev3-2_PM	DNA	CMC-Chapaev-3	0	4.20009	2.94163	3.28353	12.5653
Gypsy-226_DR-LTR	LTR	Gypsy	2.05502	0	2.57589	3.27607	2.74653
AlRepC-1023	DNA	DNA	0	3.40673	3.52583	3.27471	5.77966
GGERVL-A-int	LTR	ERVL	0	0	3.79659	3.20326	0
Gypsy120-LTR_DR	LTR	Gypsy	0	0	2.6631	3.19522	3.4391
RLTR20C2_MM	LTR	ERVK	0	2.95453	2.99571	3.19009	11.3224
Gypsy-24_DEl-I	LTR	Gypsy	9.5737	0	2.9089	3.18336	3.17123
AlRepE-95	Unknown	Unknown	9.20776	7.4363	3.44577	3.17933	2.004
AlRepE-1056	Unknown	Unknown	0	0	0	3.17375	0
DNA-2-24B_DR	DNA	DNA	2.33738	0	2.55788	3.16081	2.95907
Polinton-1_LCh	DNA	DNA	0	0	2.35351	3.14584	0
hAT-21_CPB	DNA	hAT-Charlie	0	2.47045	2.46753	3.14381	9.82166
CR1-42_HM	LINE	L2	4.94817	0	2.83421	3.13122	3.22546
Charlie17	DNA	hAT-Charlie	0	3.76335	2.9763	3.12859	6.92848
CR1-7_NV	LINE	CR1	0	0	2.77052	3.10835	2.33272
Mariner-6_DR	DNA	TcMar-Tc1	0	3.28521	2.82342	3.10665	5.96011
AlRepC-281	DNA	TcMar-Tc1	0	5.90866	3.5863	3.10636	6.19753
AlRepE-1561	LTR	Pao	2.58214	8.31507	2.76067	3.07419	9.46962
AlRepD-7076	Unknown	Unknown	2.10771	4.12638	2.4444	3.06851	4.58638
AlRepE-118	DNA	PIF-Harbinger	0	3.55658	3.55299	3.06198	8.28684
L1-12_DR	LINE	L1	0	2.13654	2.84324	3.04569	0
LTR24_Sar	LTR	ERVK	0	2.23104	2.56818	3.02343	11.5968
ERV1-10_DR-I	LTR	ERV1	0	2.76691	5.02868	3.01711	2.20015
DNA-6-N2_DR	DNA	DNA	2.18623	2.84302	3.19576	3.00764	23.0321
CR1-46_DR	LINE	L2	0	3.26299	2.93482	3.00463	11.1901
AlRepD-27	Unknown	Unknown	0	5.12714	2.40435	2.99545	5.16663
AlRepD-2292	DNA	CMC-EnSpm	0	2.78934	3.12067	2.99399	20.8015
AlRepD-2569	DNA	TcMar-Tc2	8.64976	11.1933	5.43809	2.98947	2.89482
AlRepE-5617	Unknown	Unknown	0	3.02269	2.62504	2.98524	4.40089
AlRepE-299	Unknown	Unknown	0	0	2.69418	2.98234	0
Chapaev-3A_HM	DNA	CMC-Chapaev	2.81717	2.13867	2.53563	2.97663	3.28145
Helitron-8_CGi	RC	Helitron	3.32062	4.31614	3.40168	2.97465	0
DNA-2-18_DR	DNA	CMC-EnSpm	0	0	3.87048	2.965	2.528
AlRepD-4165	LINE	Dong-R4	2.95797	3.02265	5.61939	2.95652	0
Dada-tA_OL	DNA	Dada	0	0	2.44035	2.95218	0
AlRepC-1033	DNA	PIF-Harbinger	5.23201	8.10609	2.57073	2.94852	6.68722
AlRepD-2599	DNA	hAT-Charlie	0	3.35858	5.18447	2.94004	12.0953
L1-39_DR	LINE	L1	2.82186	3.52372	2.27945	2.94	0
Harbinger-2_DR	DNA	PIF-Harbinger	4.28083	7.64736	2.10313	2.92845	8.4239
TDR17B	DNA	Sola	0	2.22948	5.52073	2.92298	4.63647
AlRepD-199	DNA	DNA	0	2.8602	2.141	2.91861	11.9185
ERV1-2-I_XT	LTR	ERV1	0	0	3.78739	2.91695	0
CR1_Ele35	LINE	CR1	0	0	2.87089	2.90004	2.22471
Helitron-N14_CGi	RC	Helitron	0	0	3.40389	2.89429	0
SINE2-1B_DR	SINE	tRNA	4.16301	8.14774	2.17702	2.89276	18.6026
AlRepE-1044	Unknown	Unknown	0	2.0072	2.55485	2.89265	4.89324
AlRepD-4379	LINE	RTE-BovB	0	2.94513	2.42197	2.88638	11.8075
MINISAT4_CB	Satellite	Satellite	0	0	2.76083	2.88002	3.11814
EnSpm-6N1_DR	DNA	CMC-EnSpm	2.00848	3.26917	2.54175	2.87658	12.7899
Tx1-23_DR	LINE	L1-Tx1	2.5138	2.63793	2.83193	2.87227	0
BEL-6_CGi-I	LTR	Pao	0	0	3.58732	2.85925	8.44284
AlRepD-1609	Unknown	Unknown	0	0	2.79803	2.85404	0
L2-54_DR	LINE	L2	3.1357	2.88149	4.9673	2.85056	11.9468
ERV1-1-EC_I-int	LTR	ERV1	0	2.14426	3.6064	2.84496	2.14959
FUGUREP2	Unknown	Unknown	3.75156	3.77942	2.91935	2.8416	7.11044
DIRS-13_DR	LTR	DIRS	2.5075	2.51386	2.75103	2.83304	0
AlRepE-3032	DNA	hAT-Blackjack	0	2.15912	2.18247	2.82565	4.94648
AlRepD-2414	LTR	Gypsy	4.45169	0	2.38605	2.82367	0
REX1-8_DR	LINE	Rex-Babar	0	0	2.34887	2.82286	0
AlRepE-277	Unknown	Unknown	0	0	2.34254	2.82183	6.1361
L1-5B_EC	LINE	L1	0	2.46678	2.15543	2.81932	5.84496
AlRepC-239	Unknown	Unknown	2.12951	2.03194	2.32724	2.81442	0
hAT-N21B_DR	DNA	hAT-Ac	0	2.11515	2.23712	2.80842	8.24888
Chapaev-8_HM	DNA	CMC-Chapaev	6.17772	6.41544	3.29549	2.80299	0
AlRepE-234	Unknown	Unknown	10.0595	2.67061	2.76717	2.79806	27.7778
AlRepD-970	LINE	L2	7.96484	0	2.15208	2.79455	2.75472
DNA8-26_DR	DNA	DNA	0	0	3.05634	2.79304	0
ISL2EU-8_CGi	DNA	PIF-ISL2EU	0	0	4.22619	2.7835	8.25212
Mariner-8_LCh	DNA	DNA	0	2.00525	2.64594	2.78068	3.67915
Gypsy47-I_DR	LTR	Gypsy	9.94772	4.41453	3.20878	2.77836	3.21072
Chaplin2a_FR	DNA	hAT-Charlie	2.60292	2.20953	4.78004	2.76803	0
ERV6_MD_I-int	LTR	ERV1	0	0	2.38095	2.76089	0
hAT-15_HM	DNA	hAT-Tip100	0	2.51444	2.40442	2.75892	2.66637
AlRepE-307	Unknown	Unknown	2.51663	4.53218	2.76948	2.74543	0
Ginger1-2_DR	DNA	Ginger	0	2.83116	2.4288	2.71557	4.20055
Mutsu-2_SK	LINE	L1-Tx1	0	2.78043	2.80798	2.71476	9.88164
AlRepE-1331	LTR	ERV1	16.0799	13.3093	2.60288	2.69449	6.30348
hAT-6_XT	DNA	hAT-Charlie	4.62226	2.28844	2.41537	2.68749	13.8328
AlRepD-641	DNA	TcMar-ISRm11	5.2019	2.72667	6.93851	2.68434	2.49623
AlRepD-2331	Unknown	Unknown	0	0	2.64451	2.67797	3.65118
Gypsy-21-I_DR	LTR	Gypsy	0	4.43219	2.7233	2.67229	9.25245
AlRepD-946	Unknown	Unknown	5.43465	5.53519	4.79583	2.66543	0
Gypsy-3_AEc-I	LTR	LTR	0	0	3.44411	2.66459	0
Mariner-29_AEc	DNA	DNA	0	2.0459	2.2666	2.66407	10.4933
AlRepD-3650	Unknown	Unknown	0	5.71088	7.76554	2.66149	11.0428
BEL-50_DRe-LTR	LTR	Pao	0	0	3.23793	2.65828	2.37036
AlRepD-3065	Unknown	Unknown	2.72103	0	2.3806	2.65798	6.80115
CR1-29_BF	LINE	CR1-Zenon	2.68995	3.08227	2.3034	2.65206	0
MOSAT-2_DR	Satellite	Satellite	0	4.92904	2.51917	2.65096	4.32973
Sat-1_TSy	Satellite	Satellite	0	0	2.68793	2.64241	9.689
CATCH3I_DR	LTR	Pao	2.14747	0	2.6674	2.63822	0
EnSpm-18_DR	DNA	CMC-EnSpm	2.3637	2.21087	5.14225	2.63792	7.27164
Chapaev-20_HM	DNA	CMC-Chapaev-3	6.96873	6.00723	2.08362	2.63209	2.79655
ZFERV-2-I_DR	LTR	ERV1	0	0	0	2.62284	0
Proto2-1_BF	LINE	Proto2	2.42307	2.68277	2.41455	2.62222	0
hAT-10_DR	DNA	hAT-Tip100	2.5845	3.10597	2.64875	2.61413	0
DNA-2-31_DR	DNA	TcMar-ISRm11	8.93444	5.18737	2.64887	2.61	0
hAT-3_PM	DNA	hAT-Charlie	0	0	3.42385	2.60993	0
AlRepD-2811	Unknown	Unknown	2.41672	2.43275	2.43606	2.60209	12.3473
TC1DR2	DNA	TcMar-Tc1	0	2.42626	2.65325	2.60199	4.59456
AlRepC-2606	Unknown	Unknown	0	0	2.5785	2.60058	0
REX1-7_XT	LINE	Rex-Babar	5.03045	5.66603	2.62582	2.58677	2.27963
L2B-2_PBa	LINE	LINE	0	0	0	2.58239	0
AlRepD-355	Unknown	Unknown	0	3.06062	2.80883	2.57609	11.0421
LINEX-2_DR	Retroposon	Retroposon	0	0	2.15493	2.57391	0
REX1-1_DR	LINE	Rex-Babar	2.3646	2.73503	5.31665	2.5737	4.34032
AlRepE-3131	DNA	DNA	0	3.12355	4.91969	2.56913	13.1907
Helitron-N1_SP	RC	Helitron	0	0	3.54929	2.5656	0
AlRepC-1390	Unknown	Unknown	0	2.0412	2.79887	2.56337	10.5365
FW_DM	LINE	Jockey	0	2.30533	2.58604	2.56163	6.28267
Gypsy57-I_DR	LTR	Gypsy	0	0	2.49477	2.56107	2.94846
AlRepD-92	Unknown	Unknown	0	0	2.48613	2.55511	0
AlRepC-18	DNA	hAT	0	3.03465	2.44522	2.55163	15.5675
AlRepD-2258	DNA	hAT-Ac	0	4.78338	2.00396	2.54918	10.9149
AlRepE-2393	DNA	hAT-Charlie	0	0	2.2619	2.54838	0
AlRepD-488	Unknown	Unknown	9.25012	13.4352	6.72573	2.54551	9.7849
DNA-1-2_DR	DNA	DNA	2.37702	6.07217	2.38624	2.54004	10.1175
AlRepE-1897	LINE	L2	2.31586	6.20331	2.276	2.53326	33.3337
CR1-13_NV	LINE	Rex-Babar	0	0	2.61915	2.53017	0
AlRepE-1681	Unknown	Unknown	0	2.67182	2.31064	2.52993	6.14646
AlRepE-2361	Unknown	Unknown	0	2.41321	2.60118	2.51565	6.18896
AlRepD-2362	Unknown	Unknown	0	0	0	2.51288	0
hAT-25_LMi	DNA	hAT-Charlie	2.29408	3.50274	2.78746	2.50505	0
BEL_I-int	LTR	Pao	0	0	2.43517	2.50502	0
DNAX-23_DR	DNA	DNA	0	4.43323	4.50971	2.50015	7.72756
DIRS-1D-LTR_DR	LTR	Ngaro	2.03713	2.60294	0	2.50015	2.6665
AlRepE-2129	Unknown	Unknown	0	2.24786	0	2.49938	0
Rex1-1_ACar	LINE	Rex-Babar	0	0	2.80955	2.49893	0
DNA8-25_DR	DNA	DNA	0	2.35772	0	2.49594	0
AlRepD-3038	LINE	Rex-Babar	4.14779	4.99388	6.41774	2.49301	2.44839
DNA2-6_DR	DNA	DNA	2.07623	2.24673	2.50424	2.48783	0
AlRepD-2729	Unknown	Unknown	0	2.56163	2.07538	2.48701	9.24337
DNA-TA-1_DR	DNA	CMC-EnSpm	0	0	2.37273	2.48588	2.52251
Kiri-5_AAe	LINE	L2	0	0	2.7033	2.46918	0
AlRepC-3203	Unknown	Unknown	0	0	0	2.46815	10.313
BEL-42_DRe-I	LTR	Pao	4.50699	2.91802	2.55228	2.46547	0
Tx1-6_Crp	LINE	L1-Tx1	0	0	2.07657	2.45504	5.10317
DIRS-6B_DR	LTR	Ngaro	0	0	2.46344	2.45099	0
AlRepD-2405	LINE	L2	0	0	2.39655	2.45072	0
L2-53_DR	LINE	L2	0	0	2.14023	2.44764	5.89066
AlRepD-916	Unknown	Unknown	0	0	0	2.4471	0
AlRepE-79	LINE	L2	7.88304	11.132	4.3766	2.4466	0
AlRepD-611	DNA	hAT-hobo	2.03812	2.48603	2.83659	2.43775	6.07011
AlRepD-1040	LINE	RTE-BovB	0	0	2.17989	2.4336	0
Gypsy-23_Crp-I	LTR	Gypsy	0	2.66719	2.2955	2.42897	3.09961
CR1-16_BF	LINE	CR1	0	2.44515	2.50824	2.42686	4.77763
DNA-2-24_DR	DNA	DNA	0	2.3789	2.45675	2.41648	5.26337
Sola3-2_CB	DNA	Sola	0	0	2.10494	2.40881	0
hAT-N21_DR	DNA	hAT-Charlie	0	0	2.20763	2.40765	0
TC2_FR4	DNA	TcMar-Tc2	0	0	2.66788	2.40329	0
Gypsy-19_GA-I	LTR	Gypsy	0	0	2.12306	2.40145	0
Kiri-21_AAe	LINE	L2	0	0	2.58513	2.39537	0
Mariner-23_LCh	DNA	DNA	0	2.20171	0	2.3805	0
MIR_Aves1	SINE	MIR	3.24018	20.853	4.74962	2.37074	2.37878
Crack-2_SP	LINE	L2	0	0	2.01125	2.37054	0
AlRepD-453	LINE	L1	0	0	2.48854	2.35948	0
Rex1-21_DRe	LINE	Rex-Babar	0	2.01835	2.36317	2.35516	2.2058
AlRepD-1356	SINE	MIR	0	0	2.06361	2.35306	6.14748
DNA2-1_DR	DNA	CMC-EnSpm?	0	0	2.14361	2.35126	0
L2-50_DR	LINE	L2	0	0	2.12563	2.34879	4.55356
Chaplin7a_FR	DNA	hAT-Charlie	0	0	0	2.34802	0
L1-7_LCh	LINE	LINE	0	0	0	2.34737	0
Samurai_I-int	LTR	Gypsy	2.1773	2.32784	2.10466	2.34462	0
AlRepE-2742	Unknown	Unknown	2.22006	0	2.2636	2.33913	0
AlRepC-987	DNA	TcMar-Tc1	0	2.17911	2.20031	2.33834	8.70434
AlRepD-1921	DNA	TcMar-Tc2	2.32999	2.38673	4.6088	2.33578	0
AlRepD-3787	Unknown	Unknown	0	0	8.44675	2.33525	2.35106
L2-56_DR	LINE	L2	0	0	2.30043	2.33512	7.04117
AlRepC-2359	Unknown	Unknown	0	0	0	2.33204	0
EnSpm-N13_DR	DNA	CMC-EnSpm	0	0	2.4154	2.32637	10.084
AlRepD-1127	LINE	L1	5.99123	4.66175	4.15717	2.32616	0
Rex1-29_DRe	LINE	Rex-Babar	2.00176	2.07421	0	2.32554	0
AlRepE-5455	LINE	L1-Tx1	3.36509	3.37667	5.28043	2.32382	18.1828
TC1_RP	DNA	TcMar-Tc1	0	0	4.65386	2.32369	0
Tx1-11_DR	LINE	L1-Tx1	0	0	0	2.32039	0
AlRepC-160	DNA	hAT-Ac	0	2.24901	4.26573	2.31429	5.70419
AlRepE-7493	Unknown	Unknown	2.4881	2.03426	2.45913	2.31204	0
AlRepE-1201	Unknown	Unknown	0	2.39007	2.21766	2.31056	0
GypsOL-int	LTR	Gypsy	0	0	0	2.30906	0
AlRepD-1296	Unknown	Unknown	5.329	4.89546	0	2.30824	0
AlRepD-2046	Unknown	Unknown	0	0	4.33058	2.30633	0
AlRepC-4392	LINE	Rex-Babar	15.5514	14.4912	0	2.30576	0
ERV2-4_Opr-I	LTR	ERVK	0	0	2.05571	2.30066	4.19909
Nimb-14_DR	LINE	I	0	0	0	2.3004	0
AlRepD-3081	Unknown	Unknown	6.74277	7.36479	2.24366	2.29912	4.46752
AlRepE-6034	LINE	L2	2.77412	2.19919	0	2.29871	0
AlRepE-436	Unknown	Unknown	3.39494	7.12927	2.01789	2.29821	10.4517
piggyBac-15_SM	DNA	PiggyBac	0	0	2.04413	2.29762	0
AlRepD-4371	Unknown	Unknown	2.15275	2.1121	2.18459	2.29269	0
EnSpm-10_DR	DNA	CMC-EnSpm	2.06388	2.92844	0	2.29073	2.88279
Kolobok-N4_DR	DNA	Kolobok-T2	2.21212	0	4.2087	2.28845	4.7405
L1-72_DR	LINE	L1	3.00475	2.32395	4.38236	2.28627	0
REX1-1_GA	LINE	Rex-Babar	9.55576	4.80513	0	2.28226	4.28368
AlRepE-262	DNA	hAT-Tip100	0	0	0	2.28214	7.83746
Gypsy-26_GA-I	LTR	Gypsy	0	2.2518	7.08894	2.27995	0
ERV1-N3-I_DR	LTR	ERV?	0	0	0	2.27857	0
Gypsy49-I_DR	LTR	Gypsy	2.14483	0	2.06721	2.27823	0
AlRepD-2648	Unknown	Unknown	10.2345	11.6841	2.13079	2.27014	15.46
L1-95_DR	LINE	L1	2.21098	5.23746	4.80964	2.27	2.36293
Crack-1_DR	LINE	L2	0	2.08299	2.73949	2.26987	2.02006
AlRepE-4744	Unknown	Unknown	6.8502	3.35327	0	2.26725	0
AlRepD-389	LINE	L2	2.23036	6.48862	2.12568	2.26371	4.37229
AlRepE-734	DNA	TcMar-ISRm11	9.64822	7.31658	2.32544	2.25582	0
DIRS-12_DR	LTR	DIRS	0	0	0	2.25304	0
AlRepE-1292	DNA	hAT	0	0	2.36387	2.24629	0
AlRepE-588	Unknown	Unknown	2.30428	4.74817	2.08949	2.24601	0
AlRepD-209	DNA	hAT	8.46698	3.05964	2.49122	2.2439	7.521
Polinton-2_CI	DNA	Maverick	0	0	2.3679	2.2404	0
Gypsy-31-I_DR	LTR	Gypsy	0	0	2.21981	2.23963	0
Gypsy36-I_DR	LTR	Gypsy	0	2.15538	2.49519	2.23451	0
L2-35_DRe	LINE	L2	0	2.00328	2.20813	2.23296	6.60768
Gypsy-18_OD-I	LTR	Gypsy	0	2.04315	2.24063	2.23267	3.19933
Charlie2a	DNA	hAT-Charlie	0	0	2.44969	2.23172	0
TDR19	DNA	hAT	2.61241	2.36854	0	2.22622	0
NonLTR-1C_DR	Retroposon	Retroposon	0	0	4.21046	2.22219	6.54642
Academ-1_PM	DNA	Academ	0	2.45655	2.43446	2.21869	11.2826
Helitron-7_CGi	RC	Helitron	0	0	2.87773	2.21818	0
EnSpm-17_DR	DNA	CMC-EnSpm	0	0	0	2.21742	0
AlRepE-2999	Unknown	Unknown	0	0	2.13964	2.21621	0
AlRepE-5053	Unknown	Unknown	8.09429	4.88945	2.39735	2.21472	4.91268
BovB_Gd	LINE	RTE-BovB	0	0	0	2.20236	0
hAT-5_DR	DNA	hAT-Charlie	0	0	2.01345	2.202	2.09007
DNA-8-5_DR	DNA	hAT	0	2.57581	2.24893	2.2012	8.65558
AlRepD-1812	Unknown	Unknown	0	4.10649	2.03975	2.19834	0
AlRepC-469	LINE	L2	0	2.14461	2.16537	2.19832	10.3065
AlRepD-3031	Unknown	Unknown	4.68202	2.98491	0	2.19748	7.62353
hAT-42_Lch	DNA	DNA	0	0	0	2.19745	5.76083
AlRepD-159	Unknown	Unknown	0	2.16504	0	2.1963	5.11594
Tx1-42_DR	LINE	L1-Tx1	0	0	2.55526	2.19538	0
Nimb-4_DR	LINE	I	2.4947	2.35922	2.18497	2.18988	2.45337
L2-8_LCh	LINE	LINE	0	0	2.43251	2.18819	0
AlRepD-370	LINE	L2	7.91089	9.82152	4.32735	2.18796	2.14649
Sola1-1_AC	DNA	Sola	0	2.2452	2.01878	2.18516	7.8408
AlRepE-2537	DNA	PiggyBac	7.34434	6.20447	2.36941	2.18503	0
Mariner-3_DR	DNA	TcMar-ISRm11	0	5.0516	2.23113	2.18473	0
Mariner-2N2_XT	DNA	TcMar-Tc2	0	0	0	2.18267	0
hAT-N150_DR	DNA	hAT	0	0	0	2.17785	0
Gypsy-13_GA-I	LTR	Gypsy	0	0	2.30156	2.17771	0
AlRepE-747	LTR	ERVK	0	0	0	2.17684	2.11549
L1-59_DR	LINE	L1	6.56475	6.84905	4.794	2.17407	3.05818
Transib-12_HM	DNA	CMC-Transib	0	2.0889	2.43199	2.1715	3.95945
BovB_Gl	LINE	RTE-BovB	5.09303	3.05292	0	2.1695	0
hATN-28_DRe	DNA	hAT-Charlie	0	0	0	2.16808	2.47558
GLT2_SM	LTR	LTR	0	2.15945	0	2.16743	0
L1-53_DR	LINE	L1	0	0	0	2.16553	0
Furousha1	DNA	hAT-Ac	0	2.02266	2.50263	2.16502	0
Gypsy141-I_DR	LTR	Gypsy	0	0	0	2.16283	0
DIRS-15_DR	LTR	Ngaro	0	0	0	2.16201	2.7873
AlRepD-311	Unknown	Unknown	0	0	0	2.15765	4.78965
L1-94_DR	LINE	L1	0	0	0	2.15523	0
Mariner-18_HSal	DNA	DNA	0	0	0	2.15335	2.46587
Tx1-18_DR	LINE	L1-Tx1	4.80219	2.92067	2.87947	2.15232	0
L2-1_DR	LINE	L2	0	2.12222	2.35285	2.14792	5.27237
LTR-12_Crp	LTR	ERV1?	0	2.07849	2.56815	2.14669	12.2384
MdoERV2a-int	LTR	ERV1	2.84937	2.31036	0	2.14659	0
AlRepD-4614	LINE	L2	4.28301	2.71975	0	2.14344	2.06191
Tx1-31_DR	LINE	L1-Tx1	4.74581	2.65628	0	2.14323	0
AlRepC-1154	LINE	RTE-BovB	4.87529	3.14502	2.22619	2.14011	0
Gypsy4-1-I_Lch	LTR	LTR	0	0	2.37604	2.13984	0
AlRepD-12181	Unknown	Unknown	2.38498	0	0	2.13757	7.1508
SATII_PC	Satellite	Satellite	9.05302	4.31729	2.07442	2.13628	2.24676
ZFERV_I-int	LTR	ERV1	0	0	0	2.13583	0
Gypsy-24-I_XT	LTR	Gypsy	0	0	0	2.13495	6.2478
AlRepD-74	DNA	PIF-Harbinger	0	0	4.36355	2.13494	0
RCC9	Satellite	Satellite	0	0	0	2.13432	2.00207
AlRepD-1926	DNA	TcMar-Tc2	7.85929	8.13621	2.45114	2.13167	0
hAT-N136_DR	DNA	hAT-Ac	2.82658	2.41861	2.11891	2.13164	0
L2-36_DRe	LINE	L2	0	0	0	2.12894	0
ERV1-1_SSc-I	LTR	ERV1	0	2.08029	2.20017	2.12761	8.0089
AlRepC-595	DNA	P	4.41746	4.50304	2.09788	2.12639	0
AlRepE-324	LTR	Gypsy	0	0	2.91398	2.12588	0
AlRepE-474	Unknown	Unknown	2.14355	0	0	2.12141	0
Gypsy100-I_DR	LTR	Gypsy	0	2.19592	0	2.12071	3.24556
AlRepD-2459	LINE	Rex-Babar	2.66789	4.94596	2.52271	2.12034	2.12011
HAT1_DR	DNA	hAT-Ac	0	0	0	2.11995	2.03661
AlRepE-3564	LINE	L1	4.67022	2.56719	2.0559	2.11746	4.64652
AlRepD-577	Unknown	Unknown	5.2375	4.75087	0	2.11728	0
L2-14_DRe	LINE	L2	0	0	2.33325	2.1133	0
ISL2EU-6_HM	DNA	PIF-ISL2EU	0	0	2.02952	2.11131	0
AlRepD-4703	Unknown	Unknown	0	0	0	2.11129	2.72854
AlRepE-368	Unknown	Unknown	0	0	2.22032	2.11119	0
tRNA-Ile-ATT	tRNA	tRNA	0	2.30643	0	2.11078	0
Helitron-N2_XT	RC	Helitron	6.29456	8.63276	2.32891	2.11058	0
TC2_FR5	DNA	TcMar-Tc2	0	2.47094	4.71119	2.10773	0
AlRepC-1574	Unknown	Unknown	2.96114	0	4.14221	2.10719	0
AlRepD-2707	DNA	DNA	4.67363	2.21241	0	2.10485	2.2682
AlRepD-2734	LINE	I	0	0	0	2.10197	0
EnSpm-N8_DR	DNA	CMC-EnSpm	2.64593	4.62269	0	2.09999	0
DNA-8-21_DR	DNA	hAT-Ac	2.17761	0	0	2.09182	0
BEL17-I_DR	LTR	Pao	0	0	0	2.08897	0
AlRepD-5953	Unknown	Unknown	0	0	0	2.08804	4.02964
AlRepD-3668	DNA	DNA	35.7806	37.303	2.26623	2.0866	0
AlRepE-4	Unknown	Unknown	0	2.09137	0	2.08289	8.36314
RTEX-2_NV	LINE	RTE-X	2.59076	0	2.395	2.07891	0
L1-68_DR	LINE	L1	0	0	0	2.07593	0
AlRepD-807	LINE	Rex-Babar	2.14764	0	4.17711	2.07534	0
AlRepE-891	Unknown	Unknown	3.74834	7.2812	2.21715	2.07183	0
AlRepD-520	Unknown	Unknown	47.3562	30.866	6.79744	2.07003	0
AlRepC-328	Unknown	Unknown	0	2.23695	2.02757	2.06882	9.886
BEL1-I_Dya	LTR	Pao	0	0	0	2.06791	0
Tc1-1_FR	DNA	TcMar-Tc1	0	0	0	2.06339	2.7384
hAT-42_HM	DNA	hAT-Tip100	2.36231	2.15261	0	2.0629	0
BEL36-LTR_DR	LTR	Pao	0	0	0	2.06132	0
Mariner-79B_HSal	DNA	DNA	0	0	2.14688	2.05958	10.0979
EnSpm-21_HMa	DNA	CMC-EnSpm	5.66823	5.78745	0	2.05917	0
Mdo2LTR2b-int	LTR	ERV1	0	2.39335	2.29124	2.05596	2.04541
AlRepD-870	Unknown	Unknown	3.23246	2.9936	0	2.05589	2.82166
Crack-16_BF	LINE	L2	0	0	0	2.05473	0
RTE-2_SK	LINE	RTE-BovB	0	0	0	2.05393	0
L1-79_DR	LINE	L1	0	2.05381	0	2.0526	0
AlRepC-670	Unknown	Unknown	0	0	2.03092	2.05074	4.88696
hAT-N21B_CPB	DNA	hAT-Charlie	0	2.67261	0	2.04993	0
AlRepD-583	Unknown	Unknown	2.7064	2.86459	0	2.04913	0
Gypsy13-I_DR	LTR	Gypsy	0	0	2.06154	2.0486	8.75158
YREP_CC	Unknown	Unknown	0	2.46053	2.8031	2.04788	3.24487
L2-6_DRe	LINE	L2	0	0	0	2.04753	2.141
Tc1-14_Xt	DNA	TcMar-Tc1	0	0	0	2.04725	0
AlRepD-5228	SINE	SINE	0	0	0	2.04653	0
CR1-20_SP	LINE	L2	0	0	2.14135	2.04556	0
I_Ele4D_AAe	LINE	I	0	0	0	2.04467	0
TDR8C	DNA	DNA	2.67718	0	2.47598	2.04434	0
Gypsy-176_DR-I	LTR	Gypsy	0	0	2.05433	2.04429	0
Mariner-3_OL	DNA	TcMar-ISRm11	13.2394	7.89758	2.03174	2.04123	4.25002
DIRS-9C_DR	LTR	Ngaro	0	0	0	2.0393	0
AlRepD-590	Unknown	Unknown	0	2.61984	0	2.03794	2.08027
AlRepE-6871	LINE	RTE-BovB	0	0	0	2.03745	2.03944
Rex1-38_DRe	LINE	Rex-Babar	0	2.35876	2.3293	2.03519	2.07916
AlRepD-1441	Unknown	Unknown	8.8339	5.40265	2.01572	2.03226	4.45938
Kolobok-N21_NV	DNA	Kolobok	0	0	2.00931	2.0318	0
AlRepD-6450	LINE	L2	0	0	2.01641	2.02927	0
MER6A	DNA	TcMar-Tigger	0	0	2.00436	2.02811	2.22071
hAT-10_Crp	DNA	hAT-Charlie	0	0	2.25429	2.02477	0
Penelope-1_LCh	LINE	LINE	0	0	0	2.02415	0
AlRepD-859	DNA	hAT-Charlie	4.37154	4.95758	2.13023	2.02394	4.15589
Gypsy-27_GA-I	LTR	Gypsy	0	0	0	2.0239	0
BEL-10_DEl-I	LTR	Pao	0	0	0	2.02253	0
AlRepD-4178	Unknown	Unknown	0	0	2.61007	2.0202	0
Gypsy-13_AA-I	LTR	Gypsy	0	0	0	2.01865	0
AlRepD-1383	LTR	Gypsy	2.01185	4.32296	0	2.01623	0
Gypsy-126_DR-I	LTR	Gypsy	0	0	0	2.01515	0
AlRepD-4270	LINE	L2	5.23058	0	0	2.01509	6.17614
LTR18F_ML	LTR	ERV1	2.51975	2.39521	0	2.01223	0
AlRepD-182	SINE	tRNA	0	0	2.0194	2.00967	2.63452
AlRepD-1402	DNA	hAT-Ac	0	2.09633	0	2.00651	0
DNA-1-9_DR	DNA	PIF-Harbinger?	0	2.74658	0	2.0043	2.27144
CR1-79_HM	LINE	L2	2.48273	0	6.77339	2.00392	2.59931
Rex1-6_DR	LINE	Rex-Babar	0	0	0	2.0015	0
LTR73-int_MD	LTR	ERVK	0	0	0	2.00088	0
L2-4_DRe	LINE	L2	0	0	0	2.00087	0
TDR21	DNA	hAT-Charlie	0	0	0	2.00065	0
U2	snRNA	snRNA	0	0	0	2.00054	0
AlRepD-163	Unknown	Unknown	10.6247	2.17508	0	0	18.0989
AlRepE-3106	LTR	Pao	0	0	2.29863	0	16.7999
AlRepC-687	Unknown	Unknown	0	2.16888	0	0	12.0164
AlRepE-2032	Unknown	Unknown	0	0	2.07594	0	11.9205
AlRepE-1423	Unknown	Unknown	0	0	2.02691	0	11.0193
AlRepD-5893	Unknown	Unknown	0	0	0	0	10.7275
Sola1-1_AP	DNA	Sola	0	0	2.65206	0	10.5721
IS3EU-5_DR	DNA	IS3EU	2.08029	0	0	0	8.72854
AlRepD-146	Unknown	Unknown	0	2.09996	2.43447	0	7.73604
hAT-N36_DR	DNA	hAT?	0	0	2.00349	0	7.71435
Mariner-62_HSal	DNA	DNA	0	0	0	0	7.38453
AlRepD-2030	Unknown	Unknown	5.41195	7.79077	4.2807	0	7.11319
AlRepC-98	Unknown	Unknown	0	0	0	0	7.03815
Gypsy-15-I_DR	LTR	Gypsy	0	2.04987	0	0	6.9279
Helitron-N1_HSal	DNA	DNA	0	0	0	0	6.82913
AlRepD-856	LINE	Rex-Babar	0	2.3323	0	0	6.82291
Chaplin5_FR	DNA	hAT-Charlie	0	0	0	0	6.67149
DNA6-2_DR	DNA	DNA	0	0	0	0	6.45173
Gypsy-9_Crp-I	LTR	Gypsy	0	0	0	0	6.37193
Copia-1_GA-I	LTR	Copia	2.64944	2.33753	0	0	6.24648
AlRepD-1147	Unknown	Unknown	7.72018	10.614	0	0	5.84674
Mariner-N5_HSal	DNA	DNA	0	0	2.11044	0	5.78817
ERV1-10_AMi-I	LTR	ERV1	0	6.1288	0	0	5.63983
AlRepD-727	DNA	hAT-Ac	0	2.01289	4.25516	0	5.50629
Mariner-5_GA	DNA	TcMar-ISRm11	3.05446	3.37501	0	0	5.41681
AlRepD-1120	Unknown	Unknown	0	0	0	0	5.33272
AlRepD-3179	Unknown	Unknown	0	2.06944	0	0	5.32452
TC1_TF	DNA	TcMar-Tc1	0	0	0	0	5.27869
AlRepC-365	Unknown	Unknown	0	0	0	0	5.07208
AlRepC-1412	Unknown	Unknown	0	0	0	0	5.0496
hAT-N70_DR	DNA	hAT?	2.12192	0	0	0	4.94584
AlRepD-3604	Unknown	Unknown	2.48708	2.86111	0	0	4.90927
AlRepC-132	DNA	DNA	0	0	0	0	4.86281
AlRepE-1373	Unknown	Unknown	0	0	0	0	4.85821
AlRepD-956	DNA	PIF-Harbinger	0	2.03816	0	0	4.81501
AlRepD-328	Unknown	Unknown	0	0	0	0	4.788
AlRepD-2369	Unknown	Unknown	2.18092	3.10485	2.0859	0	4.70677
hAT-N142_DR	DNA	hAT?	2.72818	3.77176	0	0	4.68164
AlRepD-1370	Unknown	Unknown	0	0	0	0	4.67955
Gypsy-201_DR-LTR	LTR	Gypsy	0	2.28893	0	0	4.60899
AlRepD-30	Unknown	Unknown	4.40251	0	0	0	4.57447
Tx1-5_FR	LINE	L1-Tx1	0	0	0	0	4.51735
AlRepE-2778	DNA	CMC-EnSpm	0	0	0	0	4.46915
AlRepC-335	Unknown	Unknown	2.22208	6.24129	0	0	4.4237
AlRepD-1798	Unknown	Unknown	0	0	0	0	4.36452
AlRepE-3576	LTR	LTR	0	0	0	0	4.34016
AlRepC-64	Unknown	Unknown	0	2.07526	2.24139	0	4.31532
AlRepD-886	Unknown	Unknown	2.14213	0	0	0	4.22108
DNA-8-32_DR	DNA	hAT	5.86705	5.86897	4.22415	0	4.22088
AlRepE-431	LINE	L2	6.79234	8.06608	0	0	4.21405
AlRepD-2195	Unknown	Unknown	0	0	0	0	4.21334
REX5	LINE	L2	4.63522	0	0	0	4.20595
TZF28C	DNA	TcMar-Tc1	0	0	0	0	4.16196
DNA-2-32_DR	DNA	DNA	0	2.17213	0	0	3.96529
AlRepD-1385	Unknown	Unknown	0	0	0	0	3.84504
ERV-2_CPB-I	LTR	ERV1	0	2.04619	0	0	3.7113
Gypsy-6_BM-I	LTR	Gypsy	0	0	2.0045	0	3.70408
REP-4_PBa	Unknown	Unknown	0	0	0	0	3.66523
AlRepD-4032	DNA	hAT-Ac	0	0	0	0	3.63623
Chaplin1_DR	DNA	hAT-Charlie	0	0	0	0	3.61853
Tc1-13_Xt	DNA	TcMar-Tc1	0	0	0	0	3.59025
hAT-N3_FR	DNA	hAT-Tip100	0	2.70024	0	0	3.55233
AlRepD-2959	Unknown	Unknown	2.04279	0	0	0	3.52572
Zisupton-3_DR	DNA	Zisupton	0	0	0	0	3.46578
AlRepD-140	Unknown	Unknown	0	0	0	0	3.46237
AlRepD-1177	Unknown	Unknown	0	0	0	0	3.45771
Charlie3_Tarsi	DNA	hAT-Charlie	0	0	0	0	3.44241
LTR7_Hyl1	LTR	ERV1	0	0	0	0	3.36749
Daphne-73_HMa	LINE	L2	0	0	0	0	3.36733
LTR-12C2_Crp	LTR	ERV1?	0	0	0	0	3.27729
AlRepD-843	Unknown	Unknown	0	0	0	0	3.13783
hAT-N131_DR	DNA	hAT-Ac	0	0	0	0	3.10568
AlRepD-1286	DNA	TcMar-Tigger	0	2.11315	0	0	3.08826
AlRepE-180	Unknown	Unknown	2.47835	0	0	0	3.04723
SINE_FR1d	SINE	tRNA-Mermaid	0	0	0	0	3.01789
AlRepC-735	Unknown	Unknown	2.29379	2.41087	0	0	3.00094
DIRS-1E-LTR_DR	LTR	Ngaro	0	2.16639	0	0	2.96392
Gypsy146-I_DR	LTR	Gypsy	0	0	0	0	2.93746
AlRepD-366	Unknown	Unknown	0	0	0	0	2.90515
Mariner-10_DK	DNA	TcMar-Tc1	0	2.06206	0	0	2.89924
Gypsy-56_GA-I	LTR	Gypsy	0	0	0	0	2.89051
AlRepD-2446	Unknown	Unknown	0	2.50893	2.02129	0	2.83639
DNA-X-14_DR	DNA	DNA	0	2.58106	0	0	2.81382
hAT-310_Ami	DNA	hAT-Charlie	0	0	0	0	2.80297
BEL25-I_DR	LTR	Pao	0	0	0	0	2.80175
RTE-1_SK	LINE	RTE-BovB	8.15647	13.5693	0	0	2.76764
ERV1-7_AMi-I	LTR	ERV1	0	0	0	0	2.74441
AlRepD-728	Unknown	Unknown	2.72919	2.03456	0	0	2.72566
hATN-4_ACar	DNA	hAT-Charlie	2.09246	0	0	0	2.71649
L2-17_NV	LINE	L2	0	2.57012	0	0	2.69675
HATN16_DR	DNA	hAT-Charlie	2.51376	0	0	0	2.68
Crack-5_HM	LINE	L2	2.11814	0	0	0	2.66385
REX1-2_XT	LINE	Rex-Babar	0	0	0	0	2.65801
L2-27_ACar	LINE	L2	2.13494	0	0	0	2.65375
L2-5_DRe	LINE	L2	0	0	0	0	2.64582
HATN15_DR	DNA	hAT	0	0	0	0	2.63377
REX1-5_XT	LINE	Rex-Babar	3.10687	2.71893	0	0	2.62534
L1-87_DR	LINE	L1	0	0	0	0	2.6213
AlRepC-508	LINE	L2	8.05301	7.05635	2.03098	0	2.60444
L1-50_DR	LINE	L1	0	0	0	0	2.57215
L1-19_DR	LINE	L1	0	0	0	0	2.5569
Gypsy-55-I_NV	LTR	Gypsy	0	0	0	0	2.55523
AlRepE-217	Unknown	Unknown	0	2.27307	0	0	2.54852
CR1-72_AAe	LINE	CR1	0	0	0	0	2.54828
AlRepE-2094	Unknown	Unknown	0	0	0	0	2.52036
AlRepD-1612	DNA	TcMar-Tc1	0	0	0	0	2.51793
LTR94_MD	LTR	ERVK	0	0	0	0	2.51423
LOOPERN3B_DR	DNA	Kolobok-T2	0	0	0	0	2.49333
L2-36B_DRe	LINE	L2	0	0	2.44913	0	2.49125
hAT-N138_DR	DNA	hAT-Tol2	0	2.37888	0	0	2.48555
Gypsy-36_GA-I	LTR	Gypsy	0	0	0	0	2.48213
U5	snRNA	snRNA	0	0	0	0	2.48159
L1-60_DR	LINE	L1	0	0	0	0	2.48112
AlRepE-395	Unknown	Unknown	0	0	2.23892	0	2.47187
BEL-52_AA-I	LTR	Pao	0	0	0	0	2.4608
DNA-2-5_NV	DNA	DNA	0	0	0	0	2.44716
Copia-8_DAn-I	LTR	Copia	0	0	0	0	2.43908
PABL_B-int	LTR	ERV1	0	0	0	0	2.43029
TC1_PP	DNA	TcMar-Tc1	0	0	0	0	2.40585
AlRepD-5726	Unknown	Unknown	0	2.15776	2.34724	0	2.40449
AlRepC-2704	DNA	hAT-Tip100	0	2.28474	0	0	2.39825
Gypsy-12_Adi-I	LTR	Gypsy	0	0	0	0	2.39391
AlRepD-4565	DNA	MULE-MuDR	2.43855	2.04462	0	0	2.39316
AlRepD-3586	Unknown	Unknown	0	0	2.06472	0	2.39216
AlRepE-6016	Unknown	Unknown	2.18777	0	0	0	2.37104
L2-47_DR	LINE	L2	0	0	2.09634	0	2.36703
AlRepD-4141	Unknown	Unknown	2.18067	0	0	0	2.36173
L1-6_DR	LINE	L1	2.0134	0	0	0	2.35081
AlRepD-8195	Unknown	Unknown	0	0	0	0	2.33059
AlRepC-589	Unknown	Unknown	2.09559	2.21851	0	0	2.32394
AlRepE-3597	Unknown	Unknown	0	0	0	0	2.32263
AlRepC-1388	Unknown	Unknown	0	0	0	0	2.3206
AlRepE-445	Unknown	Unknown	0	0	0	0	2.31946
AlRepD-623	LINE	I-Nimb	0	0	0	0	2.31346
Gypsy-22_DWil-I	LTR	Gypsy	0	0	0	0	2.29872
AlRepD-842	Unknown	Unknown	0	0	0	0	2.2974
RTEX-14_ACar	LINE	RTE-X	0	0	0	0	2.29419
KibiTn1	LINE	L1	0	0	0	0	2.29318
R5-1_SM	LINE	R2	2.52068	0	0	0	2.29261
EnSpm-5_HM	DNA	CMC-EnSpm	0	0	0	0	2.29152
L2-2_CM	LINE	L2	0	0	0	0	2.28412
BEL-7_GA-I	LTR	Pao	0	0	4.1362	0	2.28161
AlRepE-351	LINE	L2	0	0	0	0	2.27027
LmeSINE1b	SINE	tRNA-Deu-L2	0	14.2081	0	0	2.26789
AlRepD-3570	Unknown	Unknown	0	0	0	0	2.26433
CR1-12_DR	LINE	L2	5.46448	0	0	0	2.26414
BEL-1_GA-I	LTR	Pao	0	0	0	0	2.26042
LTR7_Sar	LTR	ERVK	0	0	0	0	2.25982
Polinton-1_DAn	DNA	Maverick	0	2.32682	0	0	2.25264
Crack-31_AAe	LINE	L2	0	2.22953	0	0	2.24813
AlRepE-8693	DNA	hAT-Tip100	0	2.3011	0	0	2.24802
hAT-8_LCh	DNA	DNA	0	0	0	0	2.24324
DNA8-54_AP	DNA	DNA	0	0	0	0	2.23141
AlRepD-2229	LINE	Penelope	0	0	0	0	2.21198
Gypsy-18-I_DR	LTR	Gypsy	0	0	0	0	2.20979
Nimb-15_DR	LINE	I	0	0	4.21551	0	2.20213
Mariner-31_HM	DNA	TcMar-Fot1	0	0	0	0	2.20069
AlRepD-2961	Unknown	Unknown	4.91217	2.45773	0	0	2.1984
piggyBac-N13_DR	DNA	PiggyBac?	0	0	0	0	2.19686
EnSpm-22_HMa	DNA	CMC-EnSpm	0	0	0	0	2.19449
AlRepE-3776	DNA	DNA	2.05341	2.42514	0	0	2.19309
AlRepD-542	Unknown	Unknown	0	0	0	0	2.19301
AlRepE-4044	Unknown	Unknown	0	0	0	0	2.19177
L1-1_Tbel	LINE	L1	0	0	0	0	2.17945
Helitron-2_HM	RC	Helitron	2.63546	0	0	0	2.16399
hAT-N114_DR	DNA	hAT-Ac	0	0	0	0	2.16085
AlRepD-194	DNA	CMC-EnSpm	0	0	0	0	2.15408
Chapaev-1_AA	DNA	CMC-Chapaev	0	0	0	0	2.15396
Perere	LINE	CR1	0	0	0	0	2.15379
AlRepE-5547	LINE	Rex-Babar	0	0	0	0	2.15353
Mariner-17_HM	DNA	TcMar-Fot1	0	0	0	0	2.14923
hAT-N45B_DR	DNA	hAT	4.44795	0	0	0	2.1484
AlRepE-2962	Unknown	Unknown	3.85054	2.63347	0	0	2.14599
Mariner-3_GA	DNA	TcMar-ISRm11	5.05914	7.31832	2.17384	0	2.14135
Tx1-12_DR	LINE	L1-Tx1	0	0	0	0	2.14023
AlRepD-2225	LINE	Rex-Babar	2.00557	2.07987	0	0	2.1386
AlRepC-550	Unknown	Unknown	0	0	0	0	2.13696
L1-21_DR	LINE	L1	0	2.62171	0	0	2.13332
ERV-2B_Crp-LTR	LTR	ERV1	0	0	0	0	2.13282
AlRepD-2347	LINE	Rex-Babar	0	0	0	0	2.13262
LTR9E_Tbel	LTR	ERV1	0	0	0	0	2.13184
AlRepE-5654	Unknown	Unknown	2.0307	0	0	0	2.13171
I-1_DR	LINE	I	0	0	0	0	2.13048
AlRepE-3661	Unknown	Unknown	0	0	0	0	2.12914
Mariner-4_DAn	DNA	TcMar-Tc1	0	0	0	0	2.12832
Gypsy41-I_DR	LTR	Gypsy	0	0	0	0	2.12691
L1-42_ACar	LINE	L1	0	2.0038	0	0	2.12436
L1-24_DR	LINE	L1	0	0	0	0	2.12403
REX1-5_DR	LINE	Rex-Babar	2.65531	2.10715	0	0	2.11971
AlRepC-563	DNA	TcMar-Tc1	0	0	0	0	2.1157
AlRepC-4748	DNA	CMC-EnSpm	0	2.12627	2.03459	0	2.11557
AlRepD-1760	Unknown	Unknown	0	0	0	0	2.11399
AlRepE-541	Unknown	Unknown	0	0	0	0	2.11239
Tigger18N1_Mars	DNA	TcMar-Tigger	0	0	0	0	2.11051
P-1N_HM	DNA	P	0	0	0	0	2.10737
IS4EU-1_BF	DNA	PIF-ISL2EU	0	0	0	0	2.10721
Nimb-9_DR	LINE	I	0	0	0	0	2.1019
AlRepD-5093	DNA	hAT-Charlie	0	0	0	0	2.1003
Kolobok-N1_DR	DNA	Kolobok-T2?	0	0	0	0	2.09971
DNA-X-6_DR	DNA	DNA	0	0	0	0	2.09472
EnSpm-8_DR	DNA	CMC-EnSpm	0	2.11221	0	0	2.09289
AlRepD-1378	DNA	CMC-EnSpm	2.41933	2.41766	0	0	2.09121
AlRepD-1852	LTR	Copia	0	2.04883	0	0	2.09044
Polinton-2_AMi	DNA	Maverick	0	0	0	0	2.09014
AlRepE-2096	Unknown	Unknown	0	0	0	0	2.08994
Gypsy-46_GA-I	LTR	Gypsy	0	0	0	0	2.08898
Gypsy-50_CGi-I	LTR	Gypsy	0	0	0	0	2.08881
L2-1_PM	LINE	L2	0	0	0	0	2.08667
hAT6-N2_NV	DNA	hAT-Blackjack	0	0	0	0	2.08619
AlRepD-82	LINE	L1	4.64456	2.43675	0	0	2.08448
Rex1-40_DRe	LINE	Rex-Babar	2.99726	0	0	0	2.07863
AlRepE-11422	Unknown	Unknown	0	0	0	0	2.07303
LatiHarb1-2	DNA	DNA	0	0	0	0	2.06418
hAT-20_DR	DNA	hAT-Ac	0	0	0	0	2.06084
DNA-2-1_DR	DNA	CMC-EnSpm	0	2.19487	0	0	2.05903
Chaplin6_FR	DNA	hAT-Charlie	0	0	0	0	2.0579
AlRepE-2243	Unknown	Unknown	5.35481	2.20466	2.88811	0	2.05696
Charlie3_Xt	DNA	hAT-Charlie	0	0	0	0	2.05442
Gypsy-33_GA-I	LTR	Gypsy	0	0	0	0	2.05406
AlRepD-132	Unknown	Unknown	0	0	0	0	2.05324
DNA-2-23_DR	DNA	CMC-EnSpm	0	0	0	0	2.05148
DNA-2-33_DR	DNA	CMC-EnSpm	0	0	0	0	2.05071
AlRepC-3064	Unknown	Unknown	2.02903	0	0	0	2.04965
AlRepD-1575	DNA	hAT	0	0	0	0	2.04912
AlRepD-4293	Unknown	Unknown	2.21004	0	0	0	2.04886
DNA8-1_DR	DNA	hAT-Ac	4.36606	2.50659	2.0355	0	2.04613
AlRepD-306	DNA	PiggyBac	0	0	0	0	2.04511
CR1-18_DR	LINE	L2	0	0	0	0	2.04486
DNAX-24_DR	DNA	PIF-Harbinger?	0	2.08123	0	0	2.04287
BEL-625_AA-I	LTR	Pao	0	0	0	0	2.03968
Penelope-2_DR	LINE	Penelope	0	2.16353	0	0	2.03799
ISL2EU-1_SK	DNA	PIF-ISL2EU	0	0	0	0	2.03385
Mariner-30_HM	DNA	TcMar-Fot1	0	0	0	0	2.03276
AlRepE-3023	Unknown	Unknown	0	0	0	0	2.03005
Gypsy-25_DP-I	LTR	Gypsy	0	0	0	0	2.02814
AlRepD-1571	LINE	Rex-Babar	0	0	0	0	2.02508
AlRepD-180	Unknown	Unknown	0	0	0	0	2.0229
EnSpm-14N1_DR	DNA	CMC-EnSpm	0	0	0	0	2.01841
Copia3-I_DR	LTR	Copia	0	0	0	0	2.01643
AlRepE-6985	DNA	DNA	0	0	0	0	2.0147
CryptonV-3_DR	DNA	Crypton-V	2.23477	0	0	0	2.01315
AlRepE-3882	Unknown	Unknown	0	0	0	0	2.0122
AlRepD-1830	LTR	Gypsy	2.04475	2.75275	2.00426	0	2.01128
Mothra_OL	DNA	TcMar-Tc1	0	0	0	0	2.00949
AlRepD-1784	LINE	L2	0	0	0	0	2.00011
SINE2-2_SP	SINE	tRNA	15.5089	19.1693	0	0	0
L1-37_XT	LINE	L1	13.3859	14.3005	0	0	0
AlRepD-816	DNA	PiggyBac	12.9588	7.1105	2.51785	0	0
AlRepC-1285	Unknown	Unknown	12.7095	12.5054	2.70657	0	0
AlRepE-3962	DNA	hAT-Ac	10.8013	9.32904	0	0	0
hAT-4_ML	DNA	hAT-Charlie	9.86559	12.2044	0	0	0
DNA-TTAA0-1_DR	DNA	DNA	9.21833	9.56714	0	0	0
Mariner-2_GA	DNA	TcMar-ISRm11	8.5583	7.91507	4.19136	0	0
Rex1-1_FR	LINE	Rex-Babar	8.45733	5.88906	0	0	0
AlRepD-3826	Unknown	Unknown	8.23397	2.47815	0	0	0
SSU-rRNA_Hsa	rRNA	rRNA	8.08944	7.15339	0	0	0
BEL-9_GA-I	LTR	Pao	7.52058	0	0	0	0
AlRepD-7574	Unknown	Unknown	7.339	7.51837	0	0	0
hAT-31_DR	DNA	hAT-Ac	6.75509	7.32381	0	0	0
AlRepC-14	Unknown	Unknown	6.57609	0	0	0	0
SAT-17_DR	Satellite	Satellite	6.51128	4.31232	0	0	0
Tx1-19_DR	LINE	L1-Tx1	5.55644	4.62179	2.23325	0	0
5S	rRNA	rRNA	5.51536	6.36039	0	0	0
CR1-39_HM	LINE	CR1	5.29078	5.14776	0	0	0
tRNA-Gln-CAG	tRNA	tRNA	5.27451	6.31342	0	0	0
hAT-50_HM	DNA	hAT-Tip100	4.97199	3.20512	0	0	0
DNA-2-34_DR	DNA	TcMar-ISRm11	4.78287	5.03347	0	0	0
BEL-6_GA-I	LTR	Pao	4.73173	0	0	0	0
AlRepC-1351	DNA	hAT-Ac	4.72449	5.68488	0	0	0
tRNA-Ser-TCY	tRNA	tRNA	4.70356	7.35538	0	0	0
hAT-7_PM	DNA	hAT-Charlie	4.6988	4.08936	0	0	0
IS3EU-1_DR	DNA	IS3EU	4.61998	4.91575	2.01135	0	0
AlRepD-5654	Unknown	Unknown	4.57439	3.73979	2.07839	0	0
Polinton-1_DR	DNA	Maverick	4.39332	6.65581	2.08638	0	0
Mariner-N22_HSal	DNA	DNA	4.35809	3.97824	0	0	0
L2-12a_Lch	LINE	LINE	4.28331	4.56512	0	0	0
AlRepD-213	Unknown	Unknown	4.17281	2.77385	2.0513	0	0
DNA-AT-3_DR	DNA	DNA	4.12254	4.21886	0	0	0
Jockey-1_DVi	LINE	Jockey	4.03399	4.08799	0	0	0
hAT-N35C_DR	DNA	hAT-Ac	3.85322	4.13471	0	0	0
Gypsy89-I_DR	LTR	Gypsy	3.72119	2.55622	0	0	0
EnSpm-N17_DR	DNA	TcMar?	3.62639	5.20841	0	0	0
hAT-N149_DR	DNA	hAT	3.58541	2.42657	0	0	0
DNA6-4_DR	DNA	DNA	3.30041	3.09334	0	0	0
DNA-8-24_DR	DNA	hAT?	3.26903	3.65301	0	0	0
LTR14B3_Sar	LTR	ERV1	3.24156	3.29745	0	0	0
AlRepD-143	Unknown	Unknown	3.16297	3.79127	0	0	0
BEL-40_DRe-I	LTR	Pao	3.09441	2.77176	0	0	0
P-1_DR	DNA	P	3.08976	2.83739	0	0	0
I-65_AAe	LINE	I	3.05567	3.52274	0	0	0
LSU-rRNA_Mfr	rRNA	rRNA	3.0049	2.43743	0	0	0
EnSpm-12_DR	DNA	CMC-EnSpm	2.99902	0	0	0	0
L1-1_DR	LINE	L1	2.96389	2.57298	0	0	0
AlRepC-382	Unknown	Unknown	2.89795	0	4.24951	0	0
L1-60_ACar	LINE	L1	2.88003	2.39756	0	0	0
Waldo-6_AAe	LINE	R1	2.78577	0	0	0	0
Tx1-21_DR	LINE	L1-Tx1	2.77238	2.73894	0	0	0
DNA-6-N5_DR	DNA	DNA	2.75108	0	0	0	0
AlRepE-1501	Unknown	Unknown	2.7474	0	0	0	0
AlRepD-3423	Unknown	Unknown	2.70502	3.37253	0	0	0
BEL-61_DRe-I	LTR	Pao	2.69558	0	0	0	0
L1-94_Cis	LINE	L1	2.67791	2.80553	2.14436	0	0
AlRepE-130	LTR	Gypsy	2.58119	4.91818	2.38294	0	0
hAT-16_LCh	DNA	DNA	2.56058	2.05174	0	0	0
AlRepD-2913	Unknown	Unknown	2.52108	2.17285	0	0	0
L1-40_DR	LINE	L1	2.51829	2.33972	0	0	0
BEL-3_PM-I	LTR	Pao	2.51208	0	0	0	0
tRNA-Met-i	tRNA	tRNA	2.51128	2.46906	0	0	0
BEL-65_DRe-I	LTR	Pao	2.50417	3.0633	2.17452	0	0
AlRepD-2514	Unknown	Unknown	2.49691	3.81911	2.03139	0	0
Helitron-N1_DR	RC	Helitron	2.4849	3.15592	0	0	0
L1-5_LCh	LINE	LINE	2.48488	4.78965	0	0	0
L1-15a_Lch	LINE	LINE	2.48326	2.3828	0	0	0
L1-2_HM	LINE	L1-Tx1	2.46004	2.59318	0	0	0
Tc1-8B_DR	DNA	TcMar-Tc1	2.45128	2.10152	0	0	0
twinID-Spe	SINE	ID	2.44198	0	0	0	0
EnSpm-N18_DR	DNA	CMC-EnSpm	2.43094	0	0	0	0
tRNA-3_DRe	Satellite	Satellite	2.42814	0	0	0	0
AlRepE-246	LINE	Rex-Babar	2.41609	2.68783	4.49582	0	0
AlRepD-2879	DNA	hAT-Ac	2.39604	2.07762	0	0	0
AlRepE-2149	Unknown	Unknown	2.3927	2.21131	0	0	0
Helitron-4_DR	RC	Helitron	2.38009	0	0	0	0
L1-3_Opr	LINE	L1	2.37457	0	0	0	0
RTEX-2_BF	LINE	RTE-X	2.35675	0	0	0	0
I-80_AAe	LINE	I	2.34874	2.44652	0	0	0
HAT3_CI	DNA	hAT-Charlie	2.34283	0	0	0	0
5S_DM	RNA	RNA	2.34016	2.41071	0	0	0
L1-84_ACar	LINE	L1	2.32725	2.18292	0	0	0
Kolobok-3_Aplcal	DNA	Kolobok-Hydra	2.3197	0	0	0	0
AlRepD-1421	Unknown	Unknown	2.31253	0	0	0	0
Crack-18_BF	LINE	L2	2.29672	0	0	0	0
AlRepD-1491	Unknown	Unknown	2.28166	4.28621	2.00098	0	0
Tx1-20_DR	LINE	L1-Tx1	2.27741	2.03012	0	0	0
Penelope-12_XT	LINE	Penelope	2.27707	0	0	0	0
L1-65_DR	LINE	L1	2.27459	0	0	0	0
BEL-58_DRe-I	LTR	Pao	2.27247	0	0	0	0
tRNA-His-CAY_	tRNA	tRNA	2.26128	7.36508	0	0	0
hAT-N67_DR	DNA	hAT?	2.25557	0	0	0	0
KenoDr1	LINE	L1-Tx1	2.25046	2.41142	0	0	0
Mariner-N19_DR	DNA	TcMar-ISRm11	2.24729	2.16346	0	0	0
REP-19_CPB	DNA	hAT-Tip100	2.24563	2.55572	0	0	0
hAT-N25_Crp	DNA	hAT-Charlie	2.24046	2.71267	0	0	0
AlRepD-189	Unknown	Unknown	2.2372	2.02988	0	0	0
BEL-44_DRe-I	LTR	Pao	2.23521	0	0	0	0
DNA-2-12_DR	DNA	CMC-EnSpm	2.23304	0	0	0	0
AlRepD-716	DNA	hAT-Ac	2.22472	5.03173	0	0	0
AlRepD-3684	DNA	TcMar-ISRm11	2.21903	0	2.08637	0	0
BEL-16_DR-I	LTR	Pao	2.19541	2.54223	0	0	0
Tx1-41_DR	LINE	L1-Tx1	2.19362	2.00496	0	0	0
DNA2-10_CGi	DNA	DNA	2.19351	0	0	0	0
Mariner-2_OL	DNA	TcMar-ISRm11	2.1924	0	0	0	0
hAT-43_Lch	DNA	DNA	2.19047	0	0	0	0
hAT-N60_DR	DNA	hAT-Ac	2.17586	2.12466	0	0	0
AlRepE-983	LINE	R2-Hero	2.17088	0	0	0	0
hAT-1_SK	DNA	hAT-Tip100	2.17081	0	0	0	0
Gypsy-2_DSim-I	LTR	Gypsy	2.16156	0	0	0	0
AlRepE-3028	DNA	CMC-EnSpm	2.14678	0	0	0	0
AlRepD-4348	Unknown	Unknown	2.14599	2.04638	0	0	0
AlRepD-100	Unknown	Unknown	2.14509	0	0	0	0
LINEX-1_DR	Retroposon	Retroposon	2.14287	4.78255	0	0	0
AlRepD-1928	Unknown	Unknown	2.12726	0	0	0	0
AlRepC-269	DNA	TcMar-Tc1	2.12612	0	0	0	0
AlRepE-1220	LINE	Rex-Babar	2.10833	0	0	0	0
AlRepE-179	RC	Helitron	2.10716	0	0	0	0
ERV3-1-I_XT	LTR	ERVL	2.1043	0	0	0	0
REX1-1_XT	LINE	Rex-Babar	2.09942	0	0	0	0
Mariner-N2_DR	DNA	TcMar	2.09781	0	0	0	0
REP-10_CPB	Unknown	Unknown	2.09558	3.08513	0	0	0
AlRepC-1885	DNA	hAT	2.08991	3.50476	0	0	0
L1-30_AAe	LINE	L1	2.08833	0	0	0	0
Gypsy-31-LTR_DR	LTR	Gypsy	2.08696	0	0	0	0
AlRepD-2028	DNA	P	2.08127	2.07748	0	0	0
Mariner-39_HM	DNA	TcMar-Fot1	2.06464	0	2.52016	0	0
Copia5-I_DR	LTR	Copia	2.05821	2.10236	6.24328	0	0
AlRepE-284	Unknown	Unknown	2.05697	0	0	0	0
AlRepD-2742	Unknown	Unknown	2.05476	2.11251	2.16404	0	0
L1-8_DR	LINE	L1	2.05368	4.81365	0	0	0
AlRepE-182	Unknown	Unknown	2.04813	0	0	0	0
Kolobok-1_XT	DNA	Kolobok-T2	2.04784	0	0	0	0
AlRepE-3579	Unknown	Unknown	2.04454	2.48294	0	0	0
Tx1-11_AMi	LINE	L1-Tx1	2.04142	0	0	0	0
L1-104_DR	LINE	L1	2.04017	0	0	0	0
Gypsy-6_LCh-I	LTR	LTR	2.0377	0	0	0	0
AlRepD-606	Unknown	Unknown	2.03649	2.15069	0	0	0
BEL31-LTR_DR	LTR	Pao	2.03355	2.48942	0	0	0
DIRS-8B_DR	LTR	Ngaro	2.01973	0	0	0	0
BEL-9_GA-LTR	LTR	Pao	2.01689	0	0	0	0
L1-1_CPB	LINE	L1	2.01552	0	0	0	0
AlRepC-539	Unknown	Unknown	2.00989	2.06726	2.39572	0	0
tRNA-Lys-AAA	tRNA	tRNA	2.00803	2.16046	0	0	0
Helitron-N5_CGi	RC	Helitron	0	0	0	0	0
hAT-27N1_LCh	DNA	DNA	0	0	0	0	0
MMERGLN-int	LTR	ERV1	0	0	0	0	0
Harbinger-2C_CPB	DNA	Harbinger	0	0	0	0	0
Gypsy-7_Ano-LTR	LTR	Gypsy	0	0	0	0	0
DIRS-4B_XT	LTR	DIRS	0	0	0	0	0
CR1-5_DEl	LINE	CR1	0	0	0	0	0
RTE-19_BF	LINE	RTE-BovB	0	0	0	0	0
RNSAT1c	Satellite	Satellite	0	0	0	0	0
ERV2-3-I_BT	LTR	ERVK	0	0	0	0	0
Gypsy-140_AA-I	LTR	Gypsy	0	0	0	0	0
L1-7_HM	LINE	L1-Tx1	0	0	0	0	0
Gypsy-19_CQ-I	LTR	Gypsy	0	0	0	0	0
Gypsy-29_SI-I	LTR	LTR	0	0	0	0	0
DNA3a_Lch	DNA	DNA	0	0	0	0	0
DNA4-31_CGi	DNA	DNA	0	0	0	0	0
Gypsy-17_CFl-LTR	LTR	LTR	0	0	0	0	0
Gypsy-1_DVir-I	LTR	Gypsy	0	0	0	0	0
Gypsy-45_DWil-I	LTR	Gypsy	0	0	0	0	0
L2-13_DRe	LINE	L2	0	0	0	0	0
piggyBac-4_SM	DNA	PiggyBac	0	0	0	0	0
BEL-4_DMoj-I	LTR	Pao	0	0	0	0	0
HATN2_DR	DNA	hAT	0	0	0	0	0
Mariner-N3_Crp	DNA	TcMar-Mariner	0	0	0	0	0
L1-46_XT	LINE	L1	0	0	0	0	0
Sola2-1_HM	DNA	Sola	0	0	0	0	0
I-3_AC	LINE	I	0	0	0	0	0
BEL-81_AA-I	LTR	Pao	0	0	0	0	0
Kolobok-N2_LHu	DNA	DNA	0	0	0	0	0
TC1-1Bel	DNA	TcMar-Tc1	0	0	0	0	0
Gypsy-33_OD-I	LTR	Gypsy	0	0	0	0	0
Penelope-15_HM	LINE	Penelope	0	0	0	0	0
MSAT2_MG	Satellite	Satellite	0	0	0	0	0
Gypsy-133_AA-I	LTR	Gypsy	0	0	0	0	0
LTR91A	LTR	LTR	0	0	0	0	0
Mariner-4_SIn	DNA	DNA	0	0	0	0	0
LTR195_MD	LTR	ERV1	0	0	0	0	0
RNSAT1a	Satellite	Satellite	0	0	0	0	0
BEL-14_DEl-I	LTR	Pao	0	0	0	0	0
BEL-243_AA-I	LTR	Pao	0	0	0	0	0
Gypsy-50_PM-I	LTR	Gypsy	0	0	0	0	0
LTR8D1_EC	LTR	ERV1	0	0	0	0	0
Gypsy-28_Adi-I	LTR	Gypsy	0	0	0	0	0
Gyp1_Cis_int-int	LTR	Gypsy	0	0	0	0	0
ERVIIA_ME_I-int	LTR	ERVK	0	0	0	0	0
Sola2-5_HM	DNA	Sola	0	0	0	0	0
CER10-I_CE	LTR	Pao	0	0	0	0	0
R1-2_DAn	LINE	R1	0	0	0	0	0
LTR6F2_Cpo	LTR	ERVL-MaLR	0	0	0	0	0
EnSpmN1_DR	DNA	CMC-EnSpm	0	0	0	0	0
BEL-204_AA-I	LTR	Pao	0	0	0	0	0
hAT-3N1_CGi	DNA	hAT-Tip100	0	0	0	0	0
hAT1-1_NV	DNA	hAT-hAT1	0	0	0	0	0
Gypsy10-I_SP	LTR	Gypsy	0	0	0	0	0
L1-4_NV	LINE	L1-Tx1	0	0	0	0	0
L1-4_LCh	LINE	LINE	0	0	0	0	0
CR1_Ele4	LINE	CR1	0	0	0	0	0
L1_Opos4b	LINE	L1	0	0	0	0	0
HERVK13-int	LTR	ERVK	0	0	2.87765	0	0
BEL-173_AA-I	LTR	Pao	0	0	0	0	0
LTR8C_OC	LTR	ERV1	0	0	0	0	0
Copia-4_DWil-I	LTR	Copia	0	0	0	0	0
ERV1-3_SSc-I	LTR	ERV1	0	0	0	0	0
AlRepD-3782	LINE	Rex-Babar	0	0	0	0	0
CR1_Ele9	LINE	CR1	0	0	0	0	0
Gypsy-74-I_NV	LTR	Gypsy	0	0	0	0	0
hAT-N4_CPB	DNA	hAT	0	0	0	0	0
HITCHHIKER	DNA	PIF-Harbinger?	0	0	0	0	0
hAT-7N2_PM	DNA	hAT-Charlie	0	0	0	0	0
EnSpm-N1_SP	DNA	CMC-EnSpm	0	0	0	0	0
EnSpm-13_DR	DNA	CMC-EnSpm	0	0	0	0	0
PENELA_Smed	LINE	Penelope	0	0	0	0	0
hATm-7_HM	DNA	hAT-hATm	0	0	0	0	0
DIRS-1_LCh	LTR	LTR	0	0	0	0	0
Transib-3_HM	DNA	CMC-Transib	0	0	0	0	0
I-9B_AAe	LINE	I	0	0	0	0	0
DNA3-1_DF	DNA	DNA	0	0	0	0	0
R2NS-1_CGi	LINE	R2	0	0	0	0	0
Vingi-1_Croc	LINE	Jockey	0	0	0	0	0
Mariner-N1_HSal	DNA	DNA	0	0	0	0	0
CR1-64B_AAe	LINE	CR1	0	0	0	0	0
BEL-8_DEl-I	LTR	Pao	0	0	0	0	0
Gypsy-25-LTR_DR	LTR	Gypsy	0	0	0	0	0
hAT-N133_DR	DNA	hAT-Ac	0	0	0	0	0
Polinton-2_HM	DNA	Maverick	0	0	0	0	0
I-5_DR	LINE	I	0	0	0	0	0
Gypsy-144_AA-I	LTR	Gypsy	0	0	0	0	0
Mariner-28_HM	DNA	TcMar-Fot1	0	0	0	0	0
HAT2_CI	DNA	hAT-Ac	0	0	0	0	0
Invader1_I-int	LTR	Gypsy	0	0	0	0	0
I-5_DK	LINE	I	0	0	0	0	0
BEL-19_DAn-LTR	LTR	Pao	0	0	0	0	0
Kiri-11_AAe	LINE	L2	0	0	0	0	0
HAT2_CE	DNA	hAT	0	0	0	0	0
I-5_DF	LINE	I	0	0	0	0	0
Outcast_Ele3	LINE	Jockey	0	0	0	0	0
hAT5-4_NV	DNA	hAT-hAT5	0	0	0	0	0
Gypsy-260_AA-I	LTR	Gypsy	0	0	0	0	0
BEL-52_DRe-I	LTR	Pao	0	0	0	0	0
IS3EU-1_CGi	DNA	IS3EU	0	2.27418	0	0	0
Gypsy-39_CGi-I	LTR	Gypsy	0	0	0	0	0
LTR1B34a_CHo	LTR	ERVL-MaLR	0	0	0	0	0
I-79_AAe	LINE	I	0	0	0	0	0
Mariner15_CB	DNA	TcMar-Tc1	0	0	0	0	0
Gypsy9-I_AG	LTR	Gypsy	0	0	0	0	0
Gypsy-6_DBi-I	LTR	Gypsy	0	0	0	0	0
Daphne-8_HMa	LINE	L2	0	0	0	0	0
nhAT-1_EF	DNA	hAT-Charlie	0	0	0	0	0
ERV21_MD_I-int	LTR	ERV1	0	0	0	0	0
hAT-66_HM	DNA	hAT-Ac	0	0	0	0	0
DNA8-4C_DR	DNA	hAT-Charlie	0	0	0	0	0
Copia-111_AA-I	LTR	Copia	0	0	0	0	0
Copia-6_AG-I	LTR	Copia	0	0	0	0	0
Harbinger-2_GA	DNA	PIF-Harbinger	0	0	0	0	0
LTR18_Cja	LTR	ERV1	0	0	0	0	0
DNA4-1_SK	DNA	DNA	0	0	0	0	0
L2-44_DR	LINE	L2	0	0	0	0	0
L2A-1_SK	LINE	L2	0	0	0	0	0
EuthAT-2	DNA	hAT-Ac	0	0	0	0	0
Gypsy-1_CGi-LTR	LTR	Gypsy	0	0	0	0	0
Gypsy-6_DEl-I	LTR	Gypsy	0	0	0	0	0
MYSERV16_I-int	LTR	ERVK	0	0	0	0	0
HelitronY4_CE	RC	Helitron	0	0	0	0	0
hAT-19_CPB	DNA	hAT-Charlie	0	0	0	0	0
RTE-5_SP	LINE	RTE-X	0	0	0	0	0
Gypsy-14_DPu-I	LTR	Gypsy	0	0	0	0	0
CR1-3_DBp	LINE	CR1	0	0	0	0	0
hAT-N32C_DR	DNA	hAT-Charlie	0	0	0	0	0
hATm-30_HM	DNA	hAT-hATm	0	0	0	0	0
Char12Mar1_GG	DNA	hAT-Charlie	0	0	0	0	0
Mariner-N8_DR	DNA	TcMar	0	0	0	0	0
HERO-2_BF	LINE	R2-Hero	0	0	0	0	0
Tc1-1_Lch	DNA	DNA	0	0	0	0	0
L1-1_NV	LINE	L1-Tx1	0	0	0	0	0
BEL-62_AA-I	LTR	Pao	0	0	0	0	0
Gypsy-1_IS-I	LTR	Gypsy	0	0	0	0	0
Kiri-2_DK	LINE	L2	0	0	0	0	0
LTR5C_Mim	LTR	ERV1	0	0	0	0	0
AlRepE-4384	LINE	Rex-Babar	0	0	0	0	0
hAT-3_DRh	DNA	hAT-hobo	0	0	0	0	0
Gypsy-223_AA-I	LTR	Gypsy	0	0	0	0	0
Loner_Ele3	LINE	I	0	0	0	0	0
Gypsy-42_GA-LTR	LTR	Gypsy	0	0	0	0	0
EnSpm-3_HM	DNA	CMC-EnSpm	0	0	0	0	0
Gypsy-18_AMi-I	LTR	Gypsy	0	0	0	0	0
Gypsy-264_AA-I	LTR	Gypsy	0	0	0	0	0
CryptonV-3_CFl	DNA	DNA	0	0	0	0	0
Gypsy-79_AA-I	LTR	Gypsy	0	0	0	0	0
UCON84	Unknown	Unknown	0	0	0	0	0
UCON86	LINE	L2	0	0	0	0	0
Gypsy-62_CQ-I	LTR	Gypsy	0	0	0	0	0
Gypsy-28_DAn-I	LTR	Gypsy	0	0	0	0	0
Copia-2_DTa-I	LTR	Copia	0	0	0	0	0
Mariner-15_DRh	DNA	TcMar-Tc1	0	0	0	0	0
Charlie3	DNA	hAT-Charlie	0	0	0	0	0
Charlie1	DNA	hAT-Charlie	0	0	0	0	0
Charlie6	DNA	hAT-Charlie	0	0	0	0	0
L3	LINE	CR1	0	0	0	0	0
piggyBac-4_CGi	DNA	PiggyBac	0	0	0	0	0
Charlie8	DNA	hAT-Charlie	0	0	0	0	0
Copia-11_DPu-I	LTR	Copia	0	0	0	0	0
RTE-2_DBp	LINE	RTE-BovB	0	0	0	0	0
Perere-8	LINE	CR1	0	0	0	0	0
Perere-2	LINE	CR1	0	0	0	0	0
Perere-3	LINE	RTE	0	0	0	0	0
Gypsy-187_DR-I	LTR	Gypsy	0	0	0	0	0
L2-16_NVe	LINE	L2	0	0	0	0	0
Perere-6	LINE	CR1	0	0	0	0	0
Perere-7	LINE	CR1	0	0	0	0	0
Gypsy8-NVi_I-int	LTR	Gypsy	0	0	0	0	0
Kolobok-N2A_DR	DNA	Kolobok-T2	0	0	0	0	0
Crack-20_BF	LINE	L2	0	0	0	0	0
ERV1-2_AMi-LTR	LTR	ERV1	0	0	0	0	0
Gypsy-9_DRh-I	LTR	LTR	0	0	0	0	0
P-35_HM	DNA	P	0	0	0	0	0
R1_DM	LINE	R1	0	0	0	0	0
LTR6I_Cpo	LTR	ERVL-MaLR	0	0	0	0	0
hATm-49_HM	DNA	hAT-hATm	0	0	0	0	0
Penelope-1_SIn	LINE	LINE	0	0	0	0	0
AlRepD-847	LINE	L2	0	0	0	0	0
SINE2-6_SP	SINE	MIR	0	0	0	0	0
BEL-14_DPu-I	LTR	Pao	0	0	0	0	0
hAT-N76_DR	DNA	hAT?	0	0	0	0	0
L1-22_DR	LINE	L1	0	0	0	0	0
SR2A	LINE	DRE	0	0	0	0	0
SR2B	LINE	DRE	0	0	0	0	0
Hopers2	DNA	hAT-hobo	0	0	0	0	0
Hopers3	DNA	hAT-Pegasus	0	0	0	0	0
I-5_DBp	LINE	I	0	0	0	0	0
Gypsy-16_DEl-I	LTR	Gypsy	0	0	0	0	0
Tx1-50_DR	LINE	L1-Tx1	0	0	0	0	0
Kolobok-6_LMi	DNA	DNA	0	0	0	0	0
DIRS1_DR	LTR	DIRS	0	0	0	0	0
Tigger23a	DNA	TcMar-Tigger	0	0	0	0	0
ERV25a_MD_LTR	LTR	ERV1	0	0	0	0	0
Mariner-32_AEc	DNA	DNA	0	0	0	0	0
I-5_DBi	LINE	I	0	0	0	0	0
Jockey-6_DVi	LINE	Jockey	0	0	0	0	0
DNA7-2_CQ	DNA	DNA	0	0	0	0	0
Kolobok-1_DBp	DNA	Kolobok-Hydra	0	0	0	0	0
Gypsy23-I_AG	LTR	Gypsy	0	0	0	0	0
CR1-10D_AMi	LINE	CR1	0	0	0	0	0
CR1-9_SP	LINE	L2	0	0	0	0	0
HeT-A2_DVi	LINE	Jockey	0	0	0	0	0
hATm-1_SM	DNA	hAT-hATm	0	0	0	0	0
RLTR26B_Rn	LTR	ERVK	0	0	0	0	0
POT_Cis	DNA	TcMar-Pogo	0	0	0	0	0
ERV-3_PM-LTR	LTR	LTR	0	0	0	0	0
Jockey-3_DRh	LTR	LTR	0	0	0	0	0
BEL-628_AA-I	LTR	Pao	0	0	0	0	0
hAT-N14_CPB	DNA	hAT-Tip100	0	0	0	0	0
Jockey-1_Dro	LINE	Jockey	0	0	0	0	0
hAT-17B_Croc	DNA	hAT-Ac	0	0	0	0	0
Gypsy-5_AA-I	LTR	Gypsy	0	0	0	0	0
Kiri-27_AAe	LINE	L2	0	0	0	0	0
DIRS-9_DR	LTR	Ngaro	0	0	0	0	0
EnSpm-3_ADi	DNA	CMC-EnSpm	0	0	0	0	0
LTR4C_SS	LTR	ERVK	0	0	0	0	0
DIRS-3_SP	LTR	DIRS	0	0	0	0	0
L1-3_BT	LINE	L1	0	0	0	0	0
BEL-3_DFi-LTR	LTR	Pao	0	0	0	0	0
CR1-3_Croc	LINE	CR1	0	0	0	0	0
L1A_Oc	LINE	L1	0	0	0	0	0
Gypsy-35_CGi-I	LTR	Gypsy	0	0	0	0	0
Gypsy-13_DBp-I	LTR	Gypsy	0	0	0	0	0
Gypsy108-I_Dr	LTR	Gypsy	0	0	0	0	0
DIRS-3_SK	LTR	DIRS	0	0	0	0	0
BEL-12-LTR_NV	LTR	Pao	0	0	0	0	0
Kolobok-N1_AEc	DNA	DNA	0	0	0	0	0
RTE-1BN1_DAn	LINE	RTE-BovB	0	0	0	0	0
THE1D-int	LTR	ERVL-MaLR	0	0	0	0	0
Polinton-2_DEu	DNA	Maverick	0	0	0	0	0
DIRS-41_XT	LTR	DIRS	0	0	0	0	0
DNA-3-1B_DR	DNA	DNA	0	0	0	0	0
Gypsy-15_CGi-I	LTR	Gypsy	0	0	0	0	0
HERV1_I-int	LTR	ERV1	0	0	0	0	0
BEL-604_AA-I	LTR	Pao	0	0	0	0	0
hAT-8_SM	DNA	hAT-hATm	0	0	0	0	0
TguLTRK8a	LTR	ERVK	0	0	0	0	0
Ginger1-1_DR	DNA	Ginger	0	0	0	0	0
LTR45_EC	LTR	ERV1	0	0	0	0	0
BEL-87_CQ-I	LTR	Pao	0	0	0	0	0
BEL-94_AA-I	LTR	Pao	0	0	0	0	0
MuDR1_SM	DNA	MULE-MuDR	0	0	0	0	0
P1a_Cis	DNA	P	0	0	0	0	0
RatSatRep2	Unknown	Unknown	0	0	0	0	0
MSAT-1_DW	Satellite	Satellite	0	0	0	0	0
RatSatRep1	Satellite	Satellite	0	0	0	0	0
LTR48B	LTR	ERV1	0	0	0	0	0
DNAX-10B_DR	DNA	DNA	0	0	0	0	0
Gypsy-4_CSa-I	LTR	Gypsy	0	0	0	0	0
B3A	SINE	B2	0	0	0	0	0
Jockey-12_DAn	LINE	Jockey	0	0	0	0	0
hAT-14_Crp	DNA	hAT-Ac	0	0	0	0	0
I-7_DBi	LINE	I	0	0	0	0	0
L1-30_XT	LINE	L1	0	0	0	0	0
Penelope-9_XT	LINE	Penelope	0	0	0	0	0
L1MDa	LINE	L1	0	0	0	0	0
CryptonV-2_HSal	DNA	DNA	0	0	0	0	0
DIRS-8_NV	LTR	DIRS	0	0	0	0	0
Gypsy-14_DBi-I	LTR	Gypsy	0	0	0	0	0
Mariner-36_HM	DNA	TcMar-Fot1	0	0	0	0	0
Gypsy-22_DAn-I	LTR	Gypsy	0	0	0	0	0
XLLINE	LINE	CR1	0	0	0	0	0
DNA2-6_CGi	DNA	DNA	0	0	0	0	0
7SLRNA	srpRNA	srpRNA	0	0	0	0	0
Helitron-4_NVi	RC	Helitron	0	0	0	0	0
Mariner38C_CB	DNA	TcMar-Tc1	0	0	0	0	0
hAT-N4_XT	DNA	hAT-Charlie	0	0	0	0	0
P-1_LHu	DNA	DNA	0	0	0	0	0
Gypsy-5_DWil-LTR	LTR	Gypsy	0	0	0	0	0
Gypsy-5_DKi-LTR	LTR	Gypsy	0	0	0	0	0
Charlie18a	DNA	hAT-Charlie	0	0	0	0	0
DNA5-1_CGi	DNA	DNA	0	0	0	0	0
Tx1-7_AMi	LINE	L1-Tx1	0	0	0	0	0
DIRS-47_XT	LTR	DIRS	0	0	0	0	0
LmeSINE1d	SINE	SINE	0	0	0	0	0
Gypsy-63_CQ-I	LTR	Gypsy	0	0	0	0	0
Gypsy-25_DWil-I	LTR	Gypsy	0	0	0	0	0
IAPEY5_I-int	LTR	ERVK	0	0	0	0	0
Tx1-1_BF	LINE	L1-Tx1	0	0	0	0	0
piggyBac-16_SM	DNA	PiggyBac	0	0	0	0	0
Mariner-3_DBi	DNA	TcMar-Tc1	0	0	0	0	0
Tc1-2Eso	DNA	TcMar-Tc1	0	0	0	0	0
BEL-231_AA-LTR	LTR	Pao	0	0	0	0	0
IS3EU-6_DR	DNA	IS3EU	0	0	0	0	0
Mariner-20_CGi	DNA	TcMar-Tc1	0	0	0	0	0
piggyBac-N4_BF	DNA	PiggyBac	0	0	0	0	0
LTR2B_DR	LTR	LTR	0	0	0	0	0
L1-1C_Cpo	LINE	L1	0	0	0	0	0
Mariner-33_SM	DNA	TcMar-Tigger	0	0	0	0	0
Gypsy-130_DR-I	LTR	Gypsy	0	0	0	0	0
Tc1DR3_Xt	DNA	TcMar-Tc1	0	0	0	0	0
Helitron-N32_CGi	RC	Helitron	0	0	0	0	0
DIRS-26_ACar	LTR	DIRS	0	0	0	0	0
Gypsy-34_DAn-I	LTR	Gypsy	0	0	0	0	0
CryptonA-1N2_OL	DNA	Crypton	0	0	0	0	0
Gypsy-28-LTR_DR	LTR	Gypsy	0	0	0	0	0
hAT-33_HM	DNA	hAT-hAT5	0	0	0	0	0
Crack-21_BF	LINE	L2	0	0	0	0	0
hAT-36_SM	DNA	hAT-Tip100	0	0	0	0	0
BEL-2_DRh-I	LTR	LTR	0	0	0	0	0
Copia-2_DYa-I	LTR	Copia	0	0	0	0	0
ERV2-4_EE-I	LTR	ERVK	0	0	0	0	0
Copia-9_CQ-I	LTR	Copia	0	0	0	0	0
DNA8-6_DR	DNA	hAT	0	0	0	0	0
LTR16A_EC	LTR	ERV1	0	0	0	0	0
hAT-N16_LMi	DNA	hAT-Tip100	0	0	0	0	0
MER101E_ML	LTR	ERV1	0	0	0	0	0
DNA2-22_CGi	DNA	TcMar-Tc2	0	0	0	0	0
Daphne-14_HMa	LINE	L2	0	0	0	0	0
Helitron-9_CGi	RC	Helitron	0	0	0	0	0
hAT-N36B_DR	DNA	hAT?	0	0	0	0	0
AlRepE-65	Unknown	Unknown	0	0	0	0	0
CarERV2a_LTR	LTR	ERV1	0	0	0	0	0
AgaP8	DNA	P	0	0	0	0	0
Kolobok-2_Aplcal	DNA	Kolobok-Hydra	0	0	0	0	0
hATm-27_HM	DNA	hAT-hATm	0	0	0	0	0
Jockey-4_DT	LINE	Jockey	0	0	0	0	0
Mariner-1_CFl	DNA	DNA	0	0	0	0	0
Copia2-I_Dmoj	LTR	Copia	0	0	0	0	0
L1-28_ACar	LINE	L1	0	0	0	0	0
Copia-1_DSe-I	LTR	Copia	0	0	0	0	0
Jockey-4_DF	LINE	Jockey	0	0	0	0	0
Gypsy-8_DRh-I	LTR	LTR	0	0	0	0	0
Gypsy-37_Adi-I	LTR	Gypsy	0	0	0	0	0
Gypsy-7-I_XT	LTR	Gypsy	0	0	0	0	0
Gypsy-212_AA-LTR	LTR	Gypsy	0	0	0	0	0
Gypsy-43_PM-LTR	LTR	Gypsy	0	0	0	0	0
Jockey-4_DK	LINE	Jockey	0	0	0	0	0
Gypsy-183_DR-I	LTR	Gypsy	0	0	0	0	0
DIRS-14_DR	LTR	Ngaro	0	0	0	0	0
Mariner-21_CGi	DNA	TcMar-m44	0	0	0	0	0
hAT-N9_XT	DNA	hAT-Charlie	0	0	0	0	0
Penelope-1A_NV	LINE	Penelope	0	0	0	0	0
ERV-4_Crp-LTR	LTR	ERV1	0	0	0	0	0
Kolobok-22_HMa	DNA	Kolobok-Hydra	0	0	0	0	0
Mariner-3_CGi	DNA	TcMar-Mariner	0	0	0	0	0
hAT-28_LCh	DNA	DNA	0	0	0	0	0
MARWOLEN1	DNA	TcMar-Tc1	0	0	0	0	0
Helitron-N2_AC	RC	Helitron	0	0	0	0	0
Crack-22_AAe	LINE	L2	0	0	0	0	0
Harbinger-4_XT	DNA	PIF-Harbinger	0	0	0	0	0
Gypsy-131_DR-I	LTR	Gypsy	0	0	0	0	0
DNA2-1_CGi	DNA	DNA	0	0	0	0	0
Gypsy-2_AC-I	LTR	Gypsy	0	0	0	0	0
DNA-X-3_DR	DNA	DNA	0	0	0	0	0
L2-9_NVi	LINE	L2	0	0	0	0	0
Mariner-13_SIn	DNA	DNA	0	0	0	0	0
CR1-H2	LINE	CR1	0	0	0	0	0
Gypsy-3_Crp-I	LTR	Gypsy	0	0	0	0	0
CR1-L1_Tgu	LINE	CR1	0	0	0	0	0
hAT-N119_DR	DNA	hAT-Ac	0	0	0	0	0
BEL-8_DAn-LTR	LTR	Pao	0	0	0	0	0
ERV2-3_CPo-LTR	LTR	ERVK	0	0	0	0	0
Gypsy-22-LTR_SP	LTR	Gypsy	0	0	0	0	0
DNA-2-3_NVi	DNA	DNA	0	0	0	0	0
BEL-593_AA-I	LTR	Pao	0	0	0	0	0
L1-39_XT	LINE	L1	0	0	0	0	0
L1-3A_Cho	LINE	L1	0	0	0	0	0
Gypsy-17_CPB-I	LTR	Gypsy	0	0	0	0	0
DNA4-27_CGi	DNA	DNA	0	0	0	0	0
SFV1-23B_Gav-LTR	LTR	ERV4	0	0	0	0	0
Helitron-1_DEu	RC	Helitron	0	0	0	0	0
Copia-100_AA-I	LTR	Copia	0	0	0	0	0
Gypsy-13_DTa-I	LTR	Gypsy	0	0	0	0	0
Gypsy-26_OD-I	LTR	Gypsy	0	0	0	0	0
BEL-196_AA-LTR	LTR	Pao	0	0	0	0	0
AlRepD-677	Unknown	Unknown	0	0	0	0	0
Gypsy-207_DR-I	LTR	Gypsy	0	0	0	0	0
Gypsy-7_Gav-I	LTR	Gypsy	0	0	0	0	0
Gypsy-12_RP-I	LTR	Gypsy	0	0	0	0	0
Sola2-3_SP	DNA	Sola	0	0	0	0	0
TC2_FR3A	DNA	TcMar-Tc2	0	0	0	0	0
Kolobok-N4_LMi	DNA	DNA	0	0	0	0	0
Jockey-8_DRh	LTR	LTR	0	0	0	0	0
DNA4-42B_CGi	DNA	DNA	0	0	0	0	0
L2B-5_AAe	LINE	L2	0	0	0	0	0
Copia-10_CQ-I	LTR	Copia	0	0	0	0	0
Loa-1B_DT	LINE	LOA	0	0	0	0	0
Kolobok-1_CS	DNA	Kolobok-T2	0	0	0	0	0
LTR8_Mim	LTR	ERV1	0	0	0	0	0
BEL-2_SI-I	LTR	Pao	0	0	0	0	0
BEL-4-LTR_XT	LTR	Pao	0	0	0	0	0
Copia-3_Ano-LTR	LTR	Copia	0	0	0	0	0
RTEX-7_CGi	LINE	RTE-X	0	0	0	0	0
Harbinger-2_XT	DNA	PIF-Harbinger	0	0	0	0	0
Copia-4_AA-I	LTR	Copia	0	0	0	0	0
I-2_DAn	LINE	I	0	0	0	0	0
LTR23_LA	LTR	ERV1	0	0	0	0	0
TE-5_CGi	Unknown	Unknown	0	0	0	0	0
ERV1-4B_Gav-LTR	LTR	ERV1	0	0	0	0	0
Gypsy-73_AA-I	LTR	Gypsy	0	0	0	0	0
Kiri-3_DK	LINE	L2	0	0	0	0	0
I-57_AAe	LINE	I	0	0	0	0	0
Copia-9_LH-I	LTR	LTR	0	0	0	0	0
Gypsy134-I_DR	LTR	Gypsy	0	0	0	0	0
L2-5_LCh	LINE	LINE	0	0	0	0	0
Helitron-2_NVi	RC	Helitron	0	0	0	0	0
hAT-67_HM	DNA	hAT-Tip100	0	0	0	0	0
DNA-5_Crp	DNA	PIF-Harbinger	0	0	0	0	0
Helitron-N49_CGi	RC	Helitron	0	0	0	0	0
nhAT3_ML	DNA	hAT-Charlie	0	0	0	0	0
Gypsy-41_DAn-I	LTR	Gypsy	0	0	0	0	0
Kolobok-1_Ppac	DNA	Kolobok-T2	0	0	0	0	0
CR1_Ele22	LINE	CR1	0	0	0	0	0
Kiri-3_DTa	LINE	L2	0	0	0	0	0
hAT-17_CPB	DNA	hAT-Tip100	0	0	0	0	0
LTR6B_SS	LTR	ERVK	0	0	0	0	0
CR1_Ele26	LINE	CR1	0	0	0	0	0
CR1_Ele27	LINE	CR1	0	0	0	0	0
CR1_Ele24	LINE	CR1	0	0	0	0	0
nMar-14_Hmel	DNA	TcMar-Tc1	0	0	0	0	0
BTSAT2c	Satellite	centr	0	0	0	0	0
CR1_Ele28	LINE	CR1	0	0	0	0	0
CR1_Ele29	LINE	CR1	0	0	0	0	0
Outcast-16_AAe	LINE	Jockey	0	0	0	0	0
Kolobok-N1_PBa	DNA	DNA	0	0	0	0	0
P-15_HM	DNA	P	0	0	0	0	0
BEL-64_CQ-I	LTR	Pao	0	0	0	0	0
RTEX-12_ACar	LINE	RTE-X	0	0	0	0	0
RTE-16_CPB	LINE	RTE-BovB	0	0	0	0	0
LTR1_Ttr	LTR	ERV1	0	0	0	0	0
Gypsy19-LTR_SP	LTR	Gypsy	0	0	0	0	0
I-3_CQ	LINE	I	0	0	0	0	0
LTR-2056_Gav	LTR	ERV4	0	0	0	0	0
I-7_AAe	LINE	I	0	0	0	0	0
L1-3_SSc	LINE	L1	0	0	0	0	0
Gypsy-230_DR-LTR	LTR	Gypsy	0	0	0	0	0
Gypsy_6B	LTR	Gypsy	0	0	0	0	0
hATw-4_BF	DNA	hAT-hATw	0	0	0	0	0
Sola1-N4_AAe	DNA	Sola	0	0	0	0	0
BEL-93_AA-I	LTR	Pao	0	0	0	0	0
hAT-N1_SP	DNA	hAT	0	0	0	0	0
Copia-29_DPu-I	LTR	Copia	0	0	0	0	0
DIRS-36_NV	LTR	Ngaro	0	0	0	0	0
Mariner-9_BM	DNA	TcMar-Tc1	0	0	0	0	0
Harbinger-1_SP	DNA	PIF-Harbinger	0	0	0	0	0
BEL7-I_DR	LTR	Pao	0	0	0	0	0
Gypsy74-LTR_DR	LTR	Gypsy	0	0	0	0	0
BEL-63_CQ-I	LTR	Pao	0	0	0	0	0
Helitron-1_LCh	DNA	DNA	0	0	0	0	0
TguERVK8_I-int	LTR	ERVK	0	0	0	0	0
DIRS-31_ACar	LTR	DIRS	0	0	0	0	0
CR1-77_HM	LINE	L2	0	0	0	0	0
Gypsy5-LTR_DR	LTR	Gypsy	0	0	0	0	0
BEL-2_DWil-I	LTR	Pao	0	0	0	0	0
Gypsy-16-I_HM	LTR	Gypsy	0	0	0	0	0
AlRepE-6157	Unknown	Unknown	0	0	0	0	0
LTR14C_Mim	LTR	ERV1	0	0	0	0	0
Gypsy-225_AA-I	LTR	Gypsy	0	0	0	0	0
ERV2A-CPo_I-int	LTR	ERVK	0	0	0	0	0
hAT-38_SM	DNA	hAT-hATm	0	0	0	0	0
MDG3_I-int	LTR	Gypsy	0	0	0	0	0
Gypsy-592_AA-I	LTR	Gypsy	0	0	0	0	0
MURVY-int	LTR	ERV1	0	0	0	0	0
CR1-14_Croc	LINE	CR1	0	0	0	0	0
SR2	LINE	RTE-BovB	0	0	0	0	0
MinoAg1	LINE	R1	0	0	0	0	0
ROVER-I_DM	LTR	Gypsy	0	0	0	0	0
SR1	LINE	CR1	0	0	0	0	0
Kanga2_a	DNA	TcMar-Tc2	0	0	0	0	0
Gypsy-177_AA-LTR	LTR	Gypsy	0	0	0	0	0
hAT-29_DR	DNA	hAT-Ac	0	0	0	0	0
HERVE_a-int	LTR	ERV1	0	0	0	0	0
ERV-6_CPB-I	LTR	ERV1	0	0	0	0	0
KolobokE-2_TC	DNA	DNA	0	0	0	0	0
Gypsy-6_AEc-LTR	LTR	LTR	0	0	0	0	0
hAT-6_Crp	DNA	hAT-Charlie	0	0	0	0	0
BEL11-I_AG	LTR	Pao	0	0	0	0	0
Gypsy-162_AA-I	LTR	Gypsy	0	0	0	0	0
DNA2-13_DR	DNA	DNA	0	0	0	0	0
L1-21_Lch	LINE	LINE	0	0	0	0	0
CR1-9_NV	LINE	Rex-Babar	0	0	0	0	0
Gypsy-25_OD-I	LTR	Gypsy	0	0	0	0	0
Polinton-2A_NV	DNA	Maverick	0	0	0	0	0
Helitron-N2f_CGi	RC	Helitron	0	0	0	0	0
Gypsy72-I_AG	LTR	Gypsy	0	0	0	0	0
L1-2_SP	LINE	L1	0	0	0	0	0
ERV3-2_CJa-I	LTR	ERV1	0	0	0	0	0
BEL-11_DPu-I	LTR	Pao	0	0	0	0	0
Copia-5_Ano-LTR	LTR	Copia	0	0	0	0	0
Gypsy-244_AA-I	LTR	Gypsy	0	0	0	0	0
Gypsy-17_DEl-LTR	LTR	Gypsy	0	0	0	0	0
CR1-89_HM	LINE	CR1	0	0	0	0	0
Rehavkus-2_NVi	DNA	MULE-NOF	0	0	0	0	0
LTR24C	LTR	ERV1	0	0	0	0	0
RLTRMRS_PS	LTR	ERVK	0	0	0	0	0
piggyBac-5_CGi	DNA	PiggyBac	0	0	0	0	0
Gypsy-13_OD-I	LTR	Gypsy	0	0	0	0	0
Gypsy-25_LH-LTR	LTR	LTR	0	0	0	0	0
LTR8B_TS	LTR	ERVK	0	0	0	0	0
ERV1-3_TSy-LTR	LTR	ERV1	0	0	0	0	0
CR1-74_AAe	LINE	CR1	0	0	0	0	0
BEL-1_DKi-LTR	LTR	Pao	0	0	0	0	0
RTE-4562_AMi	LINE	RTE-BovB	0	0	0	0	0
Gypsy-32_DYa-LTR	LTR	Gypsy	0	0	0	0	0
BovB-1_DR	LINE	RTE-BovB	0	0	0	0	0
Gypsy-190_DR-I	LTR	Gypsy	0	0	0	0	0
Gypsy20-LTR_SP	LTR	Gypsy	0	0	0	0	0
MERVL-int	LTR	ERVL	0	0	0	0	0
DIRS-9_CPB	LTR	DIRS	0	0	0	0	0
SAT-22_DR	Satellite	Satellite	0	0	0	0	0
Gypsy19-I_Dya	LTR	Gypsy	0	0	0	0	0
Transib-1_DF	DNA	CMC-Transib	0	0	0	0	0
DNA8-20_DR	DNA	DNA	0	0	0	0	0
SPOCK_DMi	LINE	Jockey	0	0	0	0	0
DNA18_Lch	DNA	DNA	0	0	0	0	0
L1-1_LCh	LINE	LINE	0	2.20578	2.1358	0	0
LTR21_MD	LTR	ERV1	0	0	0	0	0
LTR-334_AMi	LTR	LTR	0	0	0	0	0
hAT-12_SM	DNA	hAT-Charlie	0	0	0	0	0
PARISa_DMo	DNA	TcMar-Tc1	0	0	0	0	0
Crack-32_BF	LINE	L2	0	0	0	0	0
CR1-72_HM	LINE	CR1	0	0	0	0	0
CryptonV-10_CFl	DNA	DNA	0	0	0	0	0
L1-9_DR	LINE	L1	0	0	0	0	0
[truncated: 10,670 more rows]
