# Supplementary material for: Structural and Functional Analysis of Transposable Elements Focusing on B Chromosomes of the Cichlid Fish <em>Astatotilapia latifasciata</em>
Source: Preprints.org preprint supplement (doi:10.20944/preprints201803.0145.v1), 2018-03-19
Supplement: Supplementary file 7 [file Supplementary_file_5.xlsx]

## Sheet: RPKM
Supplementary file 5: RPKM values of repetitive elements from brain, muscle and male/female gonads.
Repeat	Class	Family	Brain Mean RPKM	Muscle Mean RPKM	Male Mean RPKM	Female Mean RPKM
AlRepA-51	Unknown	Unknown	97558.2	40794.5	58279.8	51010.5
Tc1-5_Xt	DNA	TcMar-Tc1	26948.8	9937.16	11412.7	36168
TE-X-12_DR	Unknown	Unknown	5790.02	2241.08	9956.03	27602.3
AlRepD-1658	Unknown	Unknown	6612.73	1570.65	11995.1	19220
AlRepC-373	Unknown	Unknown	25734.4	9244.05	15976	19023.6
AlRepE-6137	Unknown	Unknown	11767.6	3941.61	14674.6	18935.8
AlRepA-4	DNA	hAT-Charlie	20162.7	12270.6	15324.9	15889.1
AlRepD-2292	DNA	CMC-EnSpm	8810.31	4062.87	10780.2	13661.2
AlRepA-102	DNA	TcMar-Tc1	40156.5	20107.8	16768.4	13466
I-5B_AAe	LINE	I	21.1321	1.91383	484.305	12712.8
AlRepB-44	DNA	TcMar-Tc1	46126.2	23099.1	11500.8	11911.6
Tc1-9_Xt	DNA	TcMar-Tc1	34841.7	24566.5	13502.8	11774.2
AlRepC-17	Unknown	Unknown	16365.1	8711.98	13018.1	11663.7
AlRepC-905	Unknown	Unknown	21154.1	10216.7	8014.78	10133.6
AlRepC-580	Unknown	Unknown	12157.2	10816.6	8181.26	10028.7
AlRepC-560	Unknown	Unknown	5419.67	2487.69	45706.1	9810.87
RTE-2_AFC	LINE	RTE-BovB	34675.4	15004.7	17719.3	9458.52
TZF28B	DNA	TcMar-Tc1	9015.39	6496.29	6472.47	9378.52
AlRepC-1227	Unknown	Unknown	18746.3	6035.64	8552.17	9130.61
AlRepA-115	DNA	DNA	14024.9	7015.64	9376.98	8922.46
AlRepC-374	Unknown	Unknown	559.056	200.077	858.315	8597.89
AlRepD-1079	DNA	TcMar-Tc1	8960.14	5188.86	7695.38	8313.97
AlRepB-103	LINE	RTE-BovB	37429.6	14529.8	11940.9	8016.6
AlRepD-1793	Unknown	Unknown	15421	3043.71	5182.69	7812.53
Tc1-17a_Xen	DNA	TcMar-Tc1	573.049	159.146	502.175	7659.49
AlRepC-1412	Unknown	Unknown	2340.18	2977.43	3811.14	7496
AlRepB-112	Unknown	Unknown	23582.1	8360	11827.2	7301.3
AlRepD-1165	LINE	L2	32776.6	11375.7	61882.2	7072.5
AlRepB-569	Unknown	Unknown	5201.85	3163.42	3128.11	7029.58
AlRepD-1177	Unknown	Unknown	737.603	325.981	1569.73	6910.01
AlRepC-195	Unknown	Unknown	2758.54	1583.41	7369.89	6789.83
AlRepD-111	Unknown	Unknown	6426	3455.08	4688.02	6554.35
AlRepC-1837	LINE	L2	11006.2	3375.49	8575.6	6530.85
AlRepE-130	LTR	Gypsy	107.604	49.1834	400.627	6523.28
AlRepE-421	Unknown	Unknown	793.723	1186.24	3062.79	6168.42
AlRepE-3269	rRNA	rRNA	18204.3	2542.92	4790.42	5252.55
AlRepD-2362	Unknown	Unknown	11562.2	5371.85	4949.77	5195.42
AlRepD-1491	Unknown	Unknown	786.81	1020.37	1055.96	5158.54
AlRepC-128	DNA	hAT	9125.47	2492	3471.43	5137.89
AlRepB-13	LTR	Ngaro	5862.88	4695.66	5918.93	4868.68
hAT-N144_DR	DNA	hAT	21843.4	2657.67	13536.9	4765.97
TC1_FR1	DNA	TcMar-Tc1	11173.2	4523.77	4349.67	4671.53
AlRepC-1878	DNA	DNA	9855.02	5566.16	3992.98	4630.85
AlRepC-239	Unknown	Unknown	5691.93	1254.22	112257	4442.13
AlRepC-61	Unknown	Unknown	32585.2	5413.78	8127.22	4320.47
AlRepB-45	SINE	SINE	1543.2	994.463	3604.71	4313.64
AlRepC-946	DNA	TcMar-Tc1	8732.26	5511.82	3676.88	4094.26
AlRepB-124	DNA	DNA	7439.2	2056.89	13186.5	3937.83
AlRepC-2165	Unknown	Unknown	6623	2199.07	4473.04	3914.24
AlRepB-517	DNA	TcMar-Tc1	8779.12	7254.45	5954.38	3871.49
AlRepD-412	Unknown	Unknown	4261.77	1864.48	1704.94	3842.39
AlRepD-6292	DNA	TcMar-Tc1	4073.05	1114.8	2498.26	3721.2
AlRepD-328	Unknown	Unknown	455.679	185.583	3233.01	3705.18
Penelope-1_AFC	LINE	Penelope	32355.3	13250.9	9279.95	3607.55
AlRepD-213	Unknown	Unknown	5594.93	1078.16	3921.83	3462.58
AlRepC-1586	Unknown	Unknown	4794.42	2907.56	3410.48	3432.54
TDR13	DNA	DNA	130.792	714.435	437.889	3288.3
AlRepD-990	LTR	ERV1	5150.74	30264.6	10682.2	3275.63
hAT-2_HM	DNA	hAT-Tag1	1593.73	55.6125	1294.81	3259.1
SINE_FR2	SINE	tRNA-V	7129.39	3308.48	4019.23	3252.78
AlRepD-873	Unknown	Unknown	741.769	1100.21	775.762	3185.57
AlRepB-180	DNA	hAT-Ac	7096.34	3845.84	3414.75	3140.33
Dong_FR	LINE	Dong-R4	3615.42	1461.65	1256.27	3132.69
Polinton-2A_NV	DNA	Maverick	2261.36	436.434	1969.65	3058.55
AlRepC-692	Unknown	Unknown	6377.84	3194.93	3226.57	2988.87
Sola3-1_BF	DNA	Sola	7075.46	1504.39	3444.37	2937.54
Helitron-2_DR	RC	Helitron	8072.41	1782	8546.27	2877.19
TC1_FR2	DNA	TcMar-Tc1	5337.34	3758.08	3185.53	2770.78
Helitron-8_CGi	RC	Helitron	1.34676	1.17478	73.6321	2732.98
EnSpm-9_DR	DNA	CMC-EnSpm	6673.94	1227.5	2155.36	2681.84
AlRepD-1008	Unknown	Unknown	309.322	61.181	263.1	2626.6
AlRepD-2030	Unknown	Unknown	969.251	279.098	1285.37	2557.43
AlRepA-21	LINE	L2	19696.9	5786.97	29971	2523.75
AlRepB-99	DNA	hAT	6449.67	1871.54	3111.64	2466.91
RTEX-7_SK	LINE	RTE-X	1262.63	1071.2	15047.2	2439.29
AlRepE-2826	Unknown	Unknown	1661.08	3179.07	1536.1	2426.32
hAT-N127_DR	DNA	hAT-Charlie	1309.62	389.819	2685.79	2317.18
AlRepC-572	Unknown	Unknown	9160.26	4152.71	11509.6	2295.52
TX1	LINE	L1	42.1529	75.4898	382.741	2275.59
AlRepD-762	Unknown	Unknown	777.989	309.162	482.19	2272.84
AlRepE-1229	DNA	TcMar-Tc1	757.194	475.897	829.155	2240.93
AlRepD-1627	Unknown	Unknown	1716.19	642.142	582.734	2184.59
AlRepE-7493	Unknown	Unknown	339.088	137.461	707.443	2162.74
AlRepD-870	Unknown	Unknown	2379.76	685.162	1868.96	2108.92
AlRepD-984	Unknown	Unknown	807.177	1069.9	954.19	2106.71
AlRepE-65	Unknown	Unknown	2459.98	1375.01	1410.35	2092.72
AlRepE-747	LTR	ERVK	1044.09	436.17	974.675	1971.19
BEL1-I_SM	LTR	Pao	3321.14	4315.48	3074.5	1934.96
Mariner-N13_DR	DNA	TcMar-Tc1	2726.37	1275.45	3070.51	1933.94
ERV1-1_OPr-I	LTR	ERV1	452.557	301.713	825.782	1886.61
AlRepD-189	Unknown	Unknown	3363.5	3374.96	981.058	1866.17
AlRepE-1044	Unknown	Unknown	1391.88	657.49	1743.12	1861.82
AlRepC-64	Unknown	Unknown	7991.72	2356.33	3508.52	1831.26
AlRepC-212	Unknown	Unknown	1078.11	570.038	869.151	1810.67
AlRepC-508	LINE	L2	8827.18	2355.85	4240.68	1803.31
AlRepD-4584	Unknown	Unknown	460.599	128.451	313.086	1797.31
Maui	LINE	L2	14463.7	4208.91	8556.14	1787.98
Mariner-62_HSal	DNA	DNA	4662.62	899.597	1965.39	1767.37
AlRepC-312	DNA	TcMar-Tc1	2637.8	1026.62	1523.59	1761.83
Mariner-2_HM	DNA	TcMar-Fot1	375.628	146.451	297.216	1738.53
AlRepD-4279	Unknown	Unknown	390.054	709.474	169.11	1728.65
AlRepC-247	Unknown	Unknown	1192.42	485.419	1195.33	1717.8
AlRepD-1976	Unknown	Unknown	2888.08	1256.47	1328.92	1715.57
L1-1_AFC	LINE	L1	6921.17	5170.43	4784.62	1707.76
HERVK22-int	LTR	ERVK	100.419	111.384	572.04	1700.45
AlRepB-304	Unknown	Unknown	1354.82	1644.24	1564.07	1699.04
AlRepD-1291	Unknown	Unknown	705.032	203.705	362.973	1676.01
AlRepD-1273	DNA	PIF-Harbinger	1234.72	380.235	623.738	1674.95
AlRepD-3650	Unknown	Unknown	964.69	392.56	921.403	1658.68
L2-41_DRe	LINE	L2	12248.6	1602.57	3545.38	1642.35
AlRepD-2251	DNA	Dada	5556.74	1318.99	5445.65	1619.86
Gypsy-206_DR-I	LTR	Gypsy	771.444	165.748	350.151	1570.03
AlRepA-485	SINE	tRNA-Core	6934.73	2418.17	2784.06	1531.73
AlRepE-42	Unknown	Unknown	345.249	796.661	549.975	1526.1
AlRepD-463	Unknown	Unknown	4582.98	2412.3	6173.47	1525.97
Tc1-2_PM	DNA	TcMar-Tc1	6154.3	4554.66	2240.68	1503.19
AlRepD-2695	Unknown	Unknown	4601.59	1552.08	1156.51	1493.53
AlRepD-3065	Unknown	Unknown	1291.11	527.225	1191.7	1485.34
AlRepC-213	DNA	DNA	2914.15	615.688	1220.28	1477.59
AlRepC-349	Unknown	Unknown	1129.78	632.358	18240.1	1468.48
AlRepD-856	LINE	Rex-Babar	4841.87	850.061	1921.92	1449.92
AlRepC-46	Unknown	Unknown	705.492	522.549	597.338	1418.21
AlRepD-4348	Unknown	Unknown	4295.71	383.059	419.4	1404.06
Helitron-N26_CGi	RC	Helitron	567.27	3371.99	1261.05	1381.2
AlRepC-968	Unknown	Unknown	2018.72	1504.8	1473.62	1378.61
AlRepD-199	DNA	DNA	4432.16	1577.15	1183.43	1372.18
AlRepC-457	DNA	hAT-Charlie	677.881	197.553	528.918	1343.16
DIRS-15_DR	LTR	Ngaro	801.565	75.6014	640.142	1340.02
AlRepC-469	LINE	L2	2804.23	1166.54	2027.1	1339.33
AlRepC-32	DNA	hAT	1329.14	840.316	2117.62	1318.25
AlRepE-6108	LINE	L2	543.312	296.458	941.169	1316.3
Tc1-1_Xt	DNA	TcMar-Tc1	1676.64	741.69	1092.71	1312.11
RTE-2_CPB	LINE	RTE-BovB	124.713	60.734	439.242	1310.1
AlRepD-114	Unknown	Unknown	7206.17	589.711	1174.9	1305.51
AlRepC-501	LINE	Rex-Babar	1231.5	410.903	887.018	1303.95
hAT6-2_SP	DNA	hAT-Blackjack	1404.88	3710.09	665.524	1291.53
AlRepC-159	LINE	L2	1077.68	402.191	851.934	1276.5
Mariner-52_HSal	DNA	DNA	1127.27	1231.54	1638.4	1275.81
AlRepB-173	Retroposon	Retroposon	2714.76	2831.63	4164.83	1272.12
AlRepD-5624	Unknown	Unknown	2328.4	786.422	597.542	1263.5
AlRepC-20	DNA	hAT-Charlie	3260.96	1016.96	1226.48	1259.05
DNA-2-3_HM	DNA	CMC-EnSpm	16.4288	0	38.3896	1256.46
AlRepE-1026	Unknown	Unknown	2387.33	899.371	3209.19	1252.21
Gypsy-10_GA-LTR	LTR	Gypsy	0.900122	0	71.2625	1251.26
AlRepC-687	Unknown	Unknown	2567.45	9943.69	1748.98	1238.17
Transib-6_AAe	DNA	CMC-Transib	123.545	0	264.894	1232.75
AlRepD-2238	DNA	PIF-Harbinger	1887.57	722.803	941.185	1227.73
AlRepD-2734	LINE	I	588.322	233.605	484.063	1227.1
EnSpm-5_HM	DNA	CMC-EnSpm	848.043	5205.58	1093.9	1209.83
Kolobok-N4_XT	DNA	Kolobok-T2	220.174	98.4169	1649.13	1203.69
AlRepD-508	Unknown	Unknown	264.039	89.3268	264.52	1197.68
AlRepB-160	LINE	L2	2955.17	4645.22	1385.11	1196.57
L1-47_DR	LINE	L1	931.377	163.703	604.641	1168.81
piggyBac-1_DR	DNA	PiggyBac	943.813	618.77	1123.79	1157.02
AlRepA-386	LTR	Ngaro	2200.93	1242.95	1063.64	1156.66
AlRepA-297	Unknown	Unknown	4798.73	1413.36	3993.43	1156.45
IS3EU-1_DR	DNA	IS3EU	566.242	231.311	1229.83	1151.54
DNA-X-12_DR	DNA	DNA	1941.62	2568.41	8272.98	1145.36
AlRepE-4080	Unknown	Unknown	1844.48	2358.92	1231.43	1143.91
AlRepD-2509	Unknown	Unknown	7735.07	2340.46	3435.47	1133.63
LTR24_Sar	LTR	ERVK	4216.81	5713.64	2437.61	1109.34
AlRepC-1255	DNA	PiggyBac	1814.09	762.681	1481.36	1105.29
hAT-28_LCh	DNA	DNA	72.4756	309.469	634.125	1094.92
DNA9-3_DR	DNA	DNA	3258.39	3144.04	957.475	1090.4
AlRepC-365	Unknown	Unknown	1774.5	5002.46	2572.64	1061.05
AlRepC-2359	Unknown	Unknown	3224.62	2083.24	1295.51	1056.14
AlRepD-182	SINE	tRNA	1085.1	348.541	845.62	1051.23
AlRepA-24	SINE	MIR	12829.3	6692.33	2761.83	1043.63
hAT-26_DR	DNA	hAT-Ac	1139.88	429.871	430.386	1037.71
AlRepE-2606	Unknown	Unknown	1606.81	135.727	375.344	1032.35
DNA8-21_DR	DNA	Merlin	1422.95	178.062	909.651	1030.66
AlRepD-1441	Unknown	Unknown	147.348	72.4892	435.907	1026.37
AlRepD-2729	Unknown	Unknown	354.623	599.491	528.27	997.818
DNA8-26_DR	DNA	DNA	2183.57	880.385	1172.7	995.919
AlRepB-727	DNA	hAT-Ac	7582.72	2096.77	2692.55	988.336
AlRepD-2352	Unknown	Unknown	5490.22	1838.73	2049.04	959.676
AlRepD-1895	Unknown	Unknown	2702.6	533.037	793.601	958.146
Mariner-4_DR	DNA	TcMar-Tc1	6527.27	3315.32	2773.53	955.394
AlRepD-34	Unknown	Unknown	1651.34	699.276	417.072	952.717
SINE3_AFC	SINE	tRNA-Mermaid	350.498	296.754	287.514	948.591
REP-4_PBa	Unknown	Unknown	4386.1	1252.23	2705.58	940.243
AlRepC-1023	DNA	DNA	2235.24	1208.68	1824.46	935.791
Gypsy-19_CGi-I	LTR	Gypsy	272.17	423.652	801.301	935.664
FUGUREP2	Unknown	Unknown	4682.32	2056.34	1710.67	935.517
AlRepB-269	Unknown	Unknown	2419.82	979.23	1114.02	933.314
ERV1-1_SSc-I	LTR	ERV1	15019.3	512.211	777.702	922.986
AlRepD-1203	Unknown	Unknown	407.38	472.144	299.733	918.626
Ginger1-1_AC	DNA	Ginger	2559.83	464.632	550.257	917.935
L2-53_DR	LINE	L2	1704.01	470.139	1877.93	899.578
AlRepC-670	Unknown	Unknown	851.051	476.125	621.497	899.402
hAT-21_CPB	DNA	hAT-Charlie	1303.22	482.144	2403.79	895.29
Gypsy-31-LTR_DR	LTR	Gypsy	636.095	613.574	880.412	889.571
AlRepE-3342	Unknown	Unknown	359.339	236.113	185.166	880.003
AlRepD-2327	DNA	hAT	1345.57	383.791	746.588	876.195
hAT-N47B_DR	DNA	hAT	286.349	91.929	841.695	872.746
TC1_RP	DNA	TcMar-Tc1	1339.96	612.066	993.698	872.621
TC1DR3	DNA	TcMar-Tc1	1992.47	773.173	1218.02	869.481
AlRepD-6450	LINE	L2	589.19	280.786	522.49	861.095
AlRepC-1508	DNA	hAT-Charlie	1300.28	1144.07	1313.25	861.031
AlRepD-355	Unknown	Unknown	2697.45	1694.11	1183.76	850.869
TC1_FR3	DNA	TcMar-Tc1	1948.08	1147.85	1657.08	847.202
AlRepB-200	Unknown	Unknown	3096.37	1417.39	1377.44	845.701
Tc1-14_Xt	DNA	TcMar-Tc1	673.77	514.607	272.547	839.461
hAT-N53_DR	DNA	hAT-Ac	1522.34	983.718	1438.44	832.125
hAT-N91_DR	DNA	hAT-Ac	222.362	96.0251	455.431	828.592
AlRepC-4030	DNA	DNA	2062.87	1255.76	2503.53	823.392
AlRepD-27	Unknown	Unknown	606.266	330.403	503.128	819.546
BEL-57_CQ-I	LTR	Pao	133.689	337.586	252.191	817.899
AlRepC-1672	DNA	hAT-Ac	614.933	288.275	256.552	817.302
Tc1-7_DR	DNA	TcMar-Tc1	3953	1493.76	1830.13	815.711
AlRepD-3423	Unknown	Unknown	3978.23	248.62	922.801	813.044
Mariner-N13_HSal	DNA	DNA	3779.85	207.283	238.417	804.114
Copia-17_CQ-I	LTR	Copia	89.7927	185.268	212.85	799.306
Ag-Jock-1	LINE	Jockey	2917.75	1893.43	1019.55	788.943
Tx1-12_AMi	LINE	L1-Tx1	222.078	117.946	272.696	787.459
AlRepB-731	DNA	TcMar-Tc2	11499.8	4303.84	4707.82	787.375
ACCORD2_I-int	LTR	Gypsy	12.1375	23.306	119.628	777.863
DNA-8-3_HM	DNA	DNA	999.046	1010.71	253.488	776.484
Gypsy-25_IS-I	LTR	Gypsy	306.752	1079.75	259.906	776.367
Expander	LINE	RTE	4068.42	953.552	1123.47	773.533
Tc1-1_ACar	DNA	TcMar-Tc1	7391.77	5778.31	2612.26	772.434
AlRepE-3612	Unknown	Unknown	1405.02	560.976	833.354	765.703
AlRepD-4703	Unknown	Unknown	1237.11	453.845	389.378	764.671
Gypsy-119_AA-LTR	LTR	Gypsy	1192.61	4.55265	92.9462	763.189
CR1-22_DR	LINE	L2	663.938	111.483	112.267	753.945
AlRepD-546	Unknown	Unknown	542.91	167.18	374.812	753.527
AlRepB-234	DNA	PiggyBac	3604.35	1571.09	4142.52	750.41
AlRepB-250	DNA	DNA	2881.06	1247.66	2147.15	745.101
Gypsy-33_GA-I	LTR	Gypsy	1753.98	1042.57	286.563	740.904
REX1-4_AFC	LINE	Rex-Babar	3597.9	1693.79	2140.68	737.787
AlRepD-987	Unknown	Unknown	8959.14	7458.23	2722.23	734.398
Daphne-18_HM	LINE	L2	4328.18	469.131	1033.71	726.409
AlRepC-281	DNA	TcMar-Tc1	675.794	254.752	314.797	720.587
AlRepD-1221	LINE	Rex-Babar	1007.95	445.724	1033.96	717.204
Kolobok-2_AP	DNA	DNA	2008.41	267.093	458.323	711.046
LOOPERN2_DR	DNA	Kolobok-T2	793.272	336.967	356.155	710.558
AlRepD-1357	Unknown	Unknown	2159.96	4469.64	1480.31	708.343
Tx1-13_SK	LINE	L1-Tx1	66.8762	52.8784	519.91	707.027
Tx1-3_PM	LINE	L1-Tx1	1128.9	5994.9	1831.05	704.675
AlRepB-14	LINE	Rex-Babar	2484.69	1114.78	1851.76	699.416
ERV3-1-EC_I-int	LTR	ERVL	243.245	21.5587	602.725	696.045
Gypsy-50_GA-LTR	LTR	Gypsy	218.267	72.4795	468.287	689.991
RLTR20A4	LTR	ERVK	1416.38	618.799	1031.46	681.871
AlRepC-1154	LINE	RTE-BovB	4577.34	3291.79	2562.01	679.227
CR1-79_HM	LINE	L2	1575.83	153.236	618.925	669.598
AlRepD-1406	Unknown	Unknown	1477.05	664.154	415.581	663.338
AlRepC-1250	Unknown	Unknown	628.912	177.761	633.107	659.178
LTR2C_Opr	LTR	ERVK	566.877	211.386	271.945	657.187
AlRepD-311	Unknown	Unknown	1212.84	364.124	786.015	653.207
AlRepB-128	Unknown	Unknown	1284.89	782.228	951.712	649.109
AlRepD-5953	Unknown	Unknown	746.779	101.754	524.384	647.439
Gypsy-246_AA-I	LTR	Gypsy	40.7451	224.325	913.995	645.886
Gypsy-69_PM-I	LTR	Gypsy	10.3298	27.5142	120.106	640.597
AlRepC-563	DNA	TcMar-Tc1	2450.45	1105.34	1057.8	639.314
AlRepE-2838	DNA	hAT-Tol2	1037.42	689.003	649.681	638.901
AlRepC-216	Unknown	Unknown	924.461	530.974	421.099	638.074
Helitron-N2_DR	RC	Helitron	810.663	43.0701	392.096	636.118
ERV-4_CPB-I	LTR	ERV1	0.112212	0.396223	27.7498	631.96
AlRepD-1254	DNA	hAT-Ac	2294.25	386.02	443.617	631.872
AlRepB-60	DNA	DNA	8440.79	2378.23	2803.29	629.027
Ginger1-5_HM	DNA	Ginger	1525.03	205	1222.54	624.843
DIRS-8B_DR	LTR	Ngaro	1359	68.7442	591.417	622.74
AlRepC-328	Unknown	Unknown	901.345	450.696	585.986	619.908
AlRepD-207	Unknown	Unknown	304.914	147.595	979.477	619.266
Gypsy-49_DEl-I	LTR	Gypsy	629.249	495.048	406.994	616.526
Mariner-21_SIn	DNA	DNA	569.303	320.505	437.92	614.867
DNA2-5_DR	DNA	hAT-Ac	2106.64	348.315	1694.96	614.241
Rex1-1_PM	LINE	Rex-Babar	3854.94	1383.09	1812.23	612.294
REX1-2_XT	LINE	Rex-Babar	2649.15	670.276	875.117	610.327
Tx1-5_DR	LINE	L1-Tx1	162.922	156.055	417.031	610.089
AlRepD-688	Unknown	Unknown	3693.77	494.247	1062.57	605.847
ISL2EU-8_CGi	DNA	PIF-ISL2EU	474.559	291.939	341.919	604.45
SINE2-1_AFC	SINE	tRNA-Core	3236.51	1239.68	961.088	601.324
AlRepC-549	Unknown	Unknown	5420.55	688.198	2614.39	597.104
L2-46_DR	LINE	L2	864.195	694.957	986.591	597.098
hAT-4B_ACar	DNA	hAT-Ac	49.0185	29.3369	108.766	592.787
Gypsy68-I_AG	LTR	Gypsy	203.784	146.189	716.384	592.661
AlRepD-1235	Unknown	Unknown	736.269	277.253	378.329	592.232
AlRepD-880	Unknown	Unknown	696.602	760.632	891.942	576.433
AlRepD-386	Unknown	Unknown	1433.98	383.318	467.557	575.91
AlRepD-956	DNA	PIF-Harbinger	1249.68	262.515	839.626	575.549
DIRS-N4_DR	LTR	Ngaro	13.5156	81.8031	97.3598	574.646
Copia-27_DPu-I	LTR	Copia	175.573	117.538	170.007	573.1
AlRepD-175	Unknown	Unknown	192.819	71.8247	95.1002	571.509
AlRepD-1798	Unknown	Unknown	1199.84	668.393	386.438	569.135
AlRepD-685	Unknown	Unknown	336.106	813.508	2198.2	565.588
AlRepD-306	DNA	PiggyBac	852.523	907.966	578.472	563.384
RT1	LINE	R1	375.468	226.691	246.97	562.52
TE-X-5_DR	Satellite	Satellite	3042.64	1171.7	1064.86	556.96
AlRepD-1787	Unknown	Unknown	1285.29	651.442	1112	556.665
AlRepE-3131	DNA	DNA	1081.15	390.485	525.587	556.188
Copia-13_CQ-I	LTR	Copia	19.8209	7.05767	62.7014	555.477
Kolobok-N1_AEc	DNA	DNA	3647.31	598.317	296.71	553.663
EnSpm-N10_DR	DNA	CMC-EnSpm	630.559	135.503	535.261	551.225
Harbinger-8_DR	DNA	PIF-Harbinger	2593.12	89.6229	321.831	546.373
AlRepD-1905	Unknown	Unknown	849.448	635.788	686.925	535.229
AlRepD-1713	SINE	tRNA-Core	293.092	161.566	191.297	534.335
Harbinger-1_GA	DNA	PIF-Harbinger	855.134	349.855	1032.79	532.751
AlRepA-93	LINE	L2	3810.12	1418.19	3132.59	526.695
AlRepB-784	DNA	hAT-Ac	5641.69	2605.92	2184.17	522.899
Ngaro1_DR	LTR	Ngaro	213.978	144.819	311.935	522.569
AlRepD-1346	LINE	L2	743.808	112.66	1041.39	518.209
AlRepB-738	DNA	hAT-Ac	5860.64	11066.8	2907.3	517.719
AlRepD-2779	DNA	hAT-Ac	349.249	144.583	225.565	515.037
AlRepC-743	LINE	L2	1118.29	526.866	1943.57	512.207
AlRepB-438	DNA	hAT-Charlie	10122.3	2918.45	2206.09	511.64
BEL-1_CQ-I	LTR	Pao	236.64	11.3207	109.365	508.431
TX1_FR1	LINE	L1	26.8608	80.5157	101.964	499.079
AlRepD-1981	Unknown	Unknown	249.385	1053.02	572.667	497.834
Pigibakku	DNA	PiggyBac	559.417	89.0298	234.4	494.885
Gypsy8-I_Dpse	LTR	Gypsy	527.416	549.441	278.902	493.191
AlRepD-2733	Unknown	Unknown	1581.53	306.563	704.76	492.214
DNA-1_Gav	DNA	DNA	171.505	75.0196	108.178	490.819
Charlie16	DNA	hAT-Charlie	0.861789	1.3658	36.0904	487.94
AlRepD-2017	Unknown	Unknown	1312.22	263.458	628.548	486.79
HeliNoto	RC	Helitron	5.40478	0	70.1065	483.024
AlRepE-2127	Unknown	Unknown	252.932	145.445	717.208	482.529
AlRepC-1036	Unknown	Unknown	2699.19	6590.19	2952.94	479.098
DNA8-14_DR	DNA	DNA	133.408	129.117	510.247	476.823
Kolobok-2_CGi	DNA	Kolobok-T2	189.401	44.8596	78.615	475.688
SINE2-2_SP	SINE	tRNA	86.7573	23.6271	39.6702	470.67
AlRepD-11767	DNA	PiggyBac	202.319	76.7523	143.04	470.039
AlRepD-657	DNA	hAT-Tol2	667.202	527.826	753.235	465.454
AlRepB-126	DNA	hAT-Ac	3274.38	3106.4	1679.24	464.251
L1-47B_ACar	LINE	L1	288.042	336.602	1069.77	463.541
AlRepC-1119	DNA	hAT-Charlie	3619.25	805.941	990.023	455.621
AlRepD-5020	DNA	hAT-Ac	1950.96	437.564	678.194	451.97
AlRepD-4379	LINE	RTE-BovB	1030.1	891.151	809.379	450.245
AlRepC-589	Unknown	Unknown	28.1296	19.2199	66.1966	447.397
DNA6-6_DR	DNA	DNA	1743.23	481.492	1101.14	443.437
AlRepE-60	Unknown	Unknown	266.84	200.95	1089.52	442
AlRepE-7227	Unknown	Unknown	165.015	52.9418	53.9884	440.963
AlRepB-221	Unknown	Unknown	1364.92	522.806	702.416	438.756
ERV1-N3-I_DR	LTR	ERV	2518.84	718.673	566.565	435.485
RNERVK3-int	LTR	ERVK	0.675738	3.41449	62.3409	435.366
AlRepD-1612	DNA	TcMar-Tc1	858.261	336.262	443.646	435.094
R1_DYa	LINE	R1	1456.94	1959.46	236.79	434.373
SINE2-1_GA	SINE	MIR	385.056	1118.87	147.272	432.982
AlRepE-1640	Unknown	Unknown	167.578	388.555	309.9	430.627
REX3_XM	LINE	RTE	783.616	266.351	376.819	427.13
AlRepE-277	Unknown	Unknown	1432.17	217.688	405.944	423.223
AlRepD-325	Unknown	Unknown	340.769	134.533	128.566	422.729
L2-32_DRe	LINE	L2	437.391	70.2622	494.584	419.719
Copia-1-I_HS	LTR	Copia	331.498	79.8833	74.5082	418.045
ERV1-1-I_DR	LTR	ERV1	370.035	120.63	1096.21	417.392
AlRepE-2134	Unknown	Unknown	992.492	315.528	428.564	414.174
Mariner-15_SIn	DNA	DNA	1380.07	517.619	524.977	414.134
AlRepC-2120	DNA	hAT-Ac	461.079	550.151	192.619	413.925
Polinton-2_PBa	DNA	DNA	507.974	226.406	23.3786	412.446
Polinton-1_SP	DNA	Maverick	1074.56	208.316	203.416	412.008
Gypsy18-I_Dya	LTR	Gypsy	116.858	773.117	849.657	411.908
AlRepD-946	Unknown	Unknown	1532.06	527.246	587.815	410.573
MER31-int	LTR	ERV1	17.1589	6.78217	51.789	410.096
Ginger1-2_DR	DNA	Ginger	419.575	82.9022	394.795	397.977
AlRepE-7955	Unknown	Unknown	208.461	175.869	361.215	397.234
AlRepD-2742	Unknown	Unknown	143.377	246.247	105.674	395.971
Tx1-10_Crp	LINE	L1-Tx1	64.142	27.0627	132.643	395.958
Gypsy-87_AA-I	LTR	Gypsy	10.3201	21.1234	87.0146	392.614
Kolobok-6_CGi	DNA	Kolobok-Hydra	8.25783	0	121.141	392.568
AlRepD-5353	DNA	hAT-Charlie	1036.75	314.175	477.662	391.254
AlRepD-677	Unknown	Unknown	4189.74	390.254	422.49	389.617
Gypsy-30_CPB-I	LTR	Gypsy	770.154	5087.58	2005.95	386.07
KibiFr1	LINE	L1	276.789	3028.04	916.433	384.228
AlRepC-160	DNA	hAT-Ac	370.13	53.5601	123.06	382.481
AlRepD-44	Unknown	Unknown	690.286	275.537	1554.52	379.301
AlRepD-1040	LINE	RTE-BovB	2764.77	534.308	1801.74	377.995
AlRepE-118	DNA	PIF-Harbinger	844.917	329.42	283.3	377.705
BEL-51_DRe-I	LTR	Pao	73.0144	129.334	2913.01	376.23
AlRepD-611	DNA	hAT-hobo	1028.23	9077.79	402.594	374.753
Mariner-34_SM	DNA	TcMar-Pogo	33.4016	24.551	99.2984	370.637
Tc1-13_Xt	DNA	TcMar-Tc1	1086.5	450.143	595.941	366.213
AlRepE-4	Unknown	Unknown	850.312	300.169	541.797	363.587
AlRepD-3038	LINE	Rex-Babar	632.827	267.418	433.097	357.512
AlRepE-2999	Unknown	Unknown	111.809	85.9279	139.097	356.123
CryptonV-1_DR	DNA	Crypton-V	89.5304	75.1335	231.833	356.012
DNA8-10_DR	DNA	hAT-Ac	1346.56	349.961	923.348	354.486
AlRepD-2103	LINE	RTE-BovB	852.199	431.375	958.19	354.16
EnSpm-5_DR	DNA	CMC-EnSpm	268.139	196.954	126.718	353.133
AlRepD-1439	SINE	SINE	825.247	529.893	632.211	352.93
Polinton-2_AMi	DNA	Maverick	312.303	108.754	296.477	352.569
SPIN_Et	DNA	hAT-Charlie	369.084	3404.63	1216.31	351.244
AlRepD-1014	DNA	CMC-EnSpm	1474.31	303.349	320.486	350.66
Mariner-2_GA	DNA	TcMar-ISRm11	192.639	351.074	230.256	350.499
ENSPM-6_DR	DNA	CMC-EnSpm	939.074	190.136	1163.67	348.744
hAT-N10_CPB	DNA	hAT-Ac	20.5907	11.6416	80.7998	347.095
AlRepD-606	Unknown	Unknown	612.47	644.432	392.963	346.75
L1-11_DR	LINE	L1	1656.7	234.997	286.517	345.902
AlRepD-1055	LTR	ERV1	1944.58	515.64	1322.47	345.877
MRE1_OL	Unknown	Unknown	106.877	51.715	105.574	345.151
Tc1-1Neo	DNA	TcMar-Tc1	1248.48	519.569	432.063	344.595
AlRepE-5547	LINE	Rex-Babar	313.158	470.53	1495.17	344.302
ERV40_MD_I-int	LTR	ERV1	423.934	118.917	4280.6	342.782
7SLRNA	srpRNA	srpRNA	908.241	1218.71	80.8432	342.284
Gypsy-51_GA-LTR	LTR	Gypsy	837.797	110.55	415.652	341.996
AlRepD-1852	LTR	Copia	212.402	606.195	115.412	340.503
AlRepB-964	DNA	hAT-Tip100	4086.15	2154.38	1217.39	340.495
Tc1-11_Xt	DNA	TcMar-Tc1	494.721	226.806	212.766	340.135
Copia3-I_DR	LTR	Copia	1401.59	938.353	425.393	339.773
Loa-1_LHu	LINE	LINE	276.379	1210.89	1062.71	339.657
AlRepD-192	Unknown	Unknown	532.796	424.686	258.161	337.592
hAT-N35B_DR	DNA	hAT-Ac	103.272	442.255	239.263	335.316
Gypsy24-I_Dpse	LTR	Gypsy	47.5978	124.245	68.5589	332.966
Tc1-1_FR	DNA	TcMar-Tc1	1219.68	288.835	410.128	332.754
AlRepC-735	Unknown	Unknown	587.891	219.879	267.232	332.249
LTR11_Ami	LTR	Gypsy	1804.69	96.5425	176.599	330.451
AlRepD-4002	Unknown	Unknown	764.725	107.801	282.446	330.276
SFV1-15_AMi-I	LTR	ERV4	627.233	74.3852	216.562	328.872
LTR32_Ttr	LTR	ERV1	294.881	186.098	89.3655	327.302
hAT-N131_DR	DNA	hAT-Ac	943.461	491.602	394.233	322.391
AlRepD-29	Unknown	Unknown	119.767	27.923	167.416	322.355
DNA8-25_DR	DNA	DNA	1205.64	170.588	691.906	322.005
AlRepD-2446	Unknown	Unknown	363.79	881.774	198.992	321.867
Daphne-38_HMa	LINE	L2	473.073	50.7797	195.874	321.723
STRID3	SINE	ID	414.782	20.2468	165.215	320.675
L2-1_FR1	LINE	L2	382.307	71.0225	167.105	317.057
AlRepD-467	RC	Helitron	1101.79	512.059	1633.17	314.626
Gyps2_I-int	LTR	Gypsy	324.688	355.823	199.715	314.12
Gypsy56-I_DR	LTR	Gypsy	145.836	203.484	653.216	313.29
DNA-8-13_DR	DNA	hAT	152.528	166.292	204.896	312.677
AlRepD-211	Unknown	Unknown	373.39	136.5	2879.41	311.055
Tx1-9_DR	LINE	L1-Tx1	38.1631	18.0436	31.5959	310.74
AlRepC-2883	Unknown	Unknown	912.208	238.781	783.403	310.355
Tx1-5_PM	LINE	L1-Tx1	1005.09	640.639	412.092	309.212
Gypsy-24_DEl-I	LTR	Gypsy	305.907	1766.87	227.649	308.376
EXPANDER1_DR	LINE	RTE	1193.47	333.499	850.579	302.198
EnSpm-13_DR	DNA	CMC-EnSpm	100.948	11.4494	187.263	300.495
Rex1-31_DRe	LINE	Rex-Babar	2659.05	550.689	1037.54	300.295
AlRepC-693	Unknown	Unknown	983.375	413.549	430.26	297.743
AlRepE-5617	Unknown	Unknown	532.92	118.666	300.319	296.359
Mariner-5_CFl	DNA	DNA	342.095	0.787687	67.8202	295.984
AlRepE-431	LINE	L2	390.102	768.519	321.475	294.826
AlRepD-2530	Unknown	Unknown	646.979	167.777	1195.57	293.71
HERVL-int	LTR	ERVL	55.0971	33.9992	106.011	289.73
AlRepD-2221	Unknown	Unknown	409.867	308.903	475.118	289.398
AlRepE-474	Unknown	Unknown	449.236	100.437	193.948	288.882
LTR11a_MD	LTR	ERV1	228.115	2.08123	6.40847	288.293
HATN11B_DR	DNA	hAT	1012.72	174.906	333.077	288.088
IS3EU-4_DR	DNA	IS3EU	562.904	131.891	783.422	287.967
AlRepE-1831	Unknown	Unknown	548.594	245.305	434.517	287.805
Tc1-4Ory	DNA	TcMar-Tc1	1915.01	622.243	652.466	287.286
AlRepC-969	Unknown	Unknown	745.803	170.214	223.516	287.241
PTERV2b-int	LTR	ERV1	725.234	8.77878	14.4845	286.396
CR1-3_FR	LINE	Rex-Babar	2196.2	934.422	1418.37	285.843
DNA3-1_CGi	DNA	CMC-EnSpm	294.79	7.08364	96.2852	285.193
AlRepE-134	DNA	DNA	177.168	27.5656	155.129	284.992
Penelope_Ele2	LINE	Penelope	50.6099	18.2406	98.6385	284.905
P-29_HM	DNA	P	48.2707	67.4327	280.859	284.311
Mariner-N7_PBa	DNA	DNA	0	0	11.6323	281.782
AlRepC-2717	LINE	Rex-Babar	331.722	111.797	298.342	281.418
AlRepC-845	DNA	PIF-Harbinger	1099.94	448.063	3749.11	281.249
Copia-132_AA-I	LTR	Copia	10.93	39.1333	124.445	281.196
EnSpm-17_HM	DNA	CMC-EnSpm	958.065	173.847	341.731	281.106
L2B-5_AAe	LINE	L2	50.2378	101.68	81.3118	279.953
TART_DV	LINE	Jockey	1080.49	629.014	1243.92	279.087
ISL2EU-1_CS	DNA	PIF-ISL2EU	28.8194	5.5384	59.0284	277.9
AlRepC-595	DNA	P	1094.67	786.167	1655.25	276.913
Helitron-N1_PBa	DNA	DNA	821.394	379.218	830.259	276.419
EnSpm-N13_DR	DNA	CMC-EnSpm	6609.87	262.758	499.651	276.33
Tx1-18_Lch	LINE	LINE	318.02	29.9524	268.53	275.29
AlRepD-775	Unknown	Unknown	129.687	237.766	1337.66	274.929
EnSpm-N14_DR	DNA	CMC-EnSpm	1292.77	481.931	239.107	274.694
AlRepE-2129	Unknown	Unknown	253.622	105.114	215.042	272.919
AlRepC-754	DNA	DNA	1059.67	817.813	1144.63	271.899
AlRepD-2283	Unknown	Unknown	1083.85	364.121	433.602	271.885
AlRepD-23	LTR	ERVK	2743.88	2026.35	659.942	271.765
hAT-N21_DR	DNA	hAT-Charlie	299.648	250.008	187.514	270.643
ERV-2B_Crp-LTR	LTR	ERV1	1666.2	2299.29	566.648	269.987
AlRepE-3661	Unknown	Unknown	972.202	381.448	1051.6	268.634
AlRepB-26	LINE	L2	903.815	351.672	411.03	268.624
AlRepD-779	Unknown	Unknown	414.179	488.311	219.753	268.542
Gypsy-25_CGi-I	LTR	Gypsy	113.307	91.78	97.3141	267.916
ERV-6_LCh-I	LTR	LTR	47.3146	8.40199	115.065	264.707
AlRepE-4744	Unknown	Unknown	704.823	699.157	275.775	264.533
AlRepC-1298	Unknown	Unknown	707.755	173.545	196.072	262.153
AlRepB-351	DNA	TcMar-Tc1	647.816	291.454	465.576	261.306
Furousha1	DNA	hAT-Ac	26.2644	4.18101	189.982	260.912
Gypsy-8_AMi-LTR	LTR	Gypsy	143.989	57.1833	228.64	260.316
DNA-6-N5_DR	DNA	DNA	442.964	78.4664	31.6651	257.24
CR1-2_IS	LINE	CR1	166.116	13.6267	74.4159	256.959
AlRepB-59	DNA	hAT-Tip100	2571.12	862.822	1184.16	256.799
DNA-2-15_DR	DNA	DNA	828.153	39.3506	172.919	256.073
AlRepE-246	LINE	Rex-Babar	784.342	411.642	756.576	255.186
DNA8-4A_DR	DNA	hAT-Charlie	720.451	309.921	1125.18	254.252
L1-24_DR	LINE	L1	585.403	280.043	185.44	249.891
EnSpm-4_ADi	DNA	CMC-EnSpm	196.04	15.1569	1.57948	249.746
Mariner-30_HM	DNA	TcMar-Fot1	158.138	140.078	264.15	248.864
BEL-1_DWil-I	LTR	Pao	95.099	5.64249	443.028	248.213
Gypsy-1_AC-I	LTR	Gypsy	2726	2860.95	329.897	247.938
AlRepD-3179	Unknown	Unknown	343.387	264.668	312.968	247.701
L1-53_DR	LINE	L1	94.8739	7.51768	129.65	245.21
AlRepC-282	Unknown	Unknown	768.163	250.02	565.754	244.556
AlRepD-3031	Unknown	Unknown	1073.4	517.238	1739.96	244.424
AlRepD-1356	SINE	MIR	392.886	385.386	298.77	244.318
AlRepD-618	Unknown	Unknown	1169.25	233.573	443.986	243.565
AlRepE-10970	Unknown	Unknown	172.357	68.9286	326.905	241.813
AlRepD-2459	LINE	Rex-Babar	586.959	240.774	383.306	241.546
DNA4-24_CGi	DNA	DNA	543.648	86.4371	116.51	241.034
AlRepB-193	LINE	Penelope	1258.26	1918.77	481.59	239.985
AlRepD-974	Unknown	Unknown	345.178	110.308	271.767	239.854
AlRepD-440	Unknown	Unknown	1543.92	379.13	450.32	239.481
AlRepD-2347	LINE	Rex-Babar	90.7714	72.5499	1075.98	238.803
Helitron-4_DR	RC	Helitron	374.225	136.919	598.841	238.234
Polinton-1_DEu	DNA	Maverick	0.377236	0.544994	62.3054	238.206
CR1-20_CQ	LINE	CR1	40.5093	8.5724	28.6085	237.201
Gypsy-6_AEc-LTR	LTR	LTR	542.347	170.011	211.935	235.885
Sat-1_TSy	Satellite	Satellite	1153.86	90.7092	268.079	234.451
SFV1-12_AMi-I	LTR	ERV4	20.8086	1.36382	66.8868	232.817
DIRS-36_XT	LTR	DIRS	64.6979	64.6707	646.465	230.598
DNA-8-5_DR	DNA	hAT	1321.42	115.915	278.006	230.353
AlRepD-371	Unknown	Unknown	468.352	117.285	309.2	230.231
AlRepD-5449	Unknown	Unknown	279.051	100.836	137.984	230.118
MER6	DNA	TcMar-Tigger	869.221	342.93	271.036	225.578
AlRepE-3847	Unknown	Unknown	65.4987	11.9325	143.638	223.949
AlRepE-4155	Unknown	Unknown	587.079	165.602	802.616	222.537
AlRepE-217	Unknown	Unknown	143.571	57.7819	389.24	222.098
AlRepC-696	DNA	CMC-EnSpm	2866.26	812.622	622.483	222.062
AlRepD-347	Unknown	Unknown	3556.22	290.35	1470.25	220.982
LTR2_Tbel	LTR	ERVK	5.35659	1.05061	68.4378	220.66
AlRepD-3364	RC	Helitron	392.851	105.419	158.149	220.21
DNA-8-18_DR	DNA	hAT	1857.58	1319.22	936.327	219.454
AlRepD-5194	SINE	MIR	3749.66	1048.7	599.903	217.691
AlRepD-531	Unknown	Unknown	310.575	199.669	418.789	215.836
AlRepC-346	LINE	L2	977.608	659.17	1657.84	215.698
Copia-7-I_DR	LTR	Gypsy	24.0194	29.654	48.9405	215.271
ZFERV-2-I_DR	LTR	ERV1	253.589	665.302	492.989	214.693
AlRepC-1286	DNA	hAT-Ac	1962.42	395.479	510.887	212.047
RTE-23_CPB	LINE	RTE-BovB	13.3266	55.294	122.103	210.512
RTE-1_DR	LINE	RTE-BovB	12.4821	3.10288	675.791	210.369
L1A_Oc	LINE	L1	73.6071	94.7617	40.7452	209.97
AlRepD-2440	Unknown	Unknown	466.439	530.204	570.936	209.116
AlRepC-1885	DNA	hAT	510.457	324.93	338.777	208.982
REX1-1_GA	LINE	Rex-Babar	598.586	148.771	280.043	206.472
DIRS-17_XT	LTR	DIRS	31.6025	14.8252	223.166	206.211
AlRepA-125	DNA	PiggyBac	736.85	508.647	532.986	205.662
Tc1-3_Xt	DNA	TcMar-Tc1	553.083	116.487	426.871	203.704
AlRepE-294	Unknown	Unknown	386.937	398.097	329.061	202.005
CryptonV-2_DR	DNA	Crypton-V	524.406	175.09	117.657	201.701
Charlie17b	DNA	hAT-Charlie	44.1819	1.58813	365.57	201.129
AlRepD-2599	DNA	hAT-Charlie	667.845	349.573	524.817	200.631
L1-56_DR	LINE	L1	1217.6	303.237	557.699	198.007
L2-17_DRe	LINE	L2	300.454	98.5051	241.695	197.144
ISL2EU-3N1_CFl	DNA	DNA	329.404	284.612	106.232	196.168
Bridge1_TN	LINE	Penelope	2725.7	2137	1434.16	194.135
AlRepE-11422	Unknown	Unknown	110.82	82.5809	52.1815	194.047
AlRepB-356	Unknown	Unknown	2647.59	2286.49	1616.11	193.773
AlRepD-716	DNA	hAT-Ac	582.401	175.818	116.078	193.642
hAT-42_HM	DNA	hAT-Tip100	358.783	428.975	128.495	193.356
Gypsy47-I_DR	LTR	Gypsy	411.782	138.867	1759.55	192.768
AlRepC-1574	Unknown	Unknown	534.425	103.709	262.352	190.913
AlRepE-6985	DNA	DNA	2383.64	293.94	197.63	190.292
Mariner-N27_HSal	DNA	DNA	315.209	1127.13	185.194	186.787
Polinton-1_CGi	DNA	Maverick	104.211	45.2509	181.813	186.407
AlRepE-2026	Unknown	Unknown	65.4923	67.8532	693.174	185.781
AlRepC-555	DNA	PiggyBac	1391.79	677.672	403.515	185.615
AlRepC-269	DNA	TcMar-Tc1	696.151	232.743	394.963	184.886
HERVE-int	LTR	ERV1	112.361	91.773	164.917	184.249
AlRepB-1625	Unknown	Unknown	1471.35	323.606	320.309	183.818
AlRepE-1780	Unknown	Unknown	179.12	46.6135	314.462	183.441
AlRepD-1969	LINE	Rex-Babar	615.484	183.677	583.352	183.19
AlRepC-1957	LINE	RTE-BovB	943.495	317.486	310.775	182.989
ORTE-1_AAe	LINE	RTE-BovB	83.6136	58.2251	203.69	182.955
AlRepD-2291	Unknown	Unknown	771.389	315.823	313.695	182.337
L1-48_DR	LINE	L1	699.009	99.6581	255.658	181.827
AlRepB-767	Unknown	Unknown	678.617	178.966	1298.33	181.537
hAT-9A_XT	DNA	hAT-Ac	1.29541	1.01925	11.6862	180.992
DIRS-52_XT	LTR	DIRS	13.0127	21.8162	26.7349	180.892
Gypsy82-LTR_Dr	LTR	Gypsy	1478.75	375.644	521.788	180.534
AlRepD-2376	Unknown	Unknown	20050	173.809	545.4	179.93
AlRepC-1169	DNA	CMC-EnSpm	110.224	12.2769	43.3017	179.929
RTE-1_GA	LINE	RTE-BovB	393.793	144.193	356.988	177.003
AlRepC-637	LINE	LINE	393.479	65.0464	463.675	176.942
Copia-1_AC-I	LTR	Copia	112.796	170.845	74.0997	176.052
AlRepC-27	LINE	L2	46.1318	75.0701	40.1046	175.765
AlRepD-3570	Unknown	Unknown	208.722	19.6657	51.2147	175.326
MuDR-1_DR	DNA	MULE-NOF	62.9356	152.317	245.347	173.972
Kolobok-1_Ppac	DNA	Kolobok-T2	49.9249	74.511	141.882	173.079
Gypsy-124_AA-LTR	LTR	Gypsy	169.78	41.1396	19.4771	172.448
AlRepD-1385	Unknown	Unknown	190.12	34.0201	135.301	171.982
AlRepD-3818	Unknown	Unknown	689.92	261.477	918.261	169.712
AlRepC-558	DNA	TcMar-Fot1	235.061	3511.89	141.497	169.29
AlRepB-773	DNA	hAT-Charlie	3002.58	1394.42	848.942	168.848
SINE2-1B_DR	SINE	tRNA	342.237	207.191	234.569	168.846
Gypsy64-I_DR	LTR	Gypsy	82.7661	52.59	188.979	168.02
ERV23_MD_I-int	LTR	ERVK	94.9314	60.995	543.856	167.639
BEL-3_DTa-I	LTR	Pao	0	0	17.565	166.673
CR1-5_CGi	LINE	CR1-Zenon	34.2406	1.60054	13.4907	165.6
EnSpm-4_HM	DNA	CMC-EnSpm	302.816	184.467	98.5531	165.592
DNA-TA-12_CQ	DNA	DNA	151.424	25.3414	334.1	165.192
AlRepD-326	Unknown	Unknown	455.84	264.502	160.625	164.813
AlRepE-1423	Unknown	Unknown	300.458	136.083	370.925	163.913
DIRS-22_ACar	LTR	DIRS	104.501	106.613	933.556	163.705
AlRepC-1946	Unknown	Unknown	400.835	260.67	181.794	163.638
AlRepB-185	DNA	DNA	4778.01	1095.39	622.81	162.632
hAT-23_DR	DNA	hAT-Tip100	29.2464	8.7609	34.3961	162.629
AlRepC-521	Retroposon	Retroposon	271.785	128.634	303.558	162.181
AlRepE-659	DNA	TcMar-Tc1	247.798	87.2193	200.372	162.137
AlRepD-1230	Unknown	Unknown	468.576	270.497	388.843	161.584
AlRepD-2997	DNA	hAT	497.84	335.004	300.29	160.117
TRAS3_BM	LINE	R1	426.774	55.9124	230.987	159.356
RLTR45-int	LTR	ERVK	158.195	17.8899	195.273	158.832
Gypsy-66_AA-I	LTR	Gypsy	201.401	154.13	33.9016	158.598
AlRepD-5518	Unknown	Unknown	76.5363	2.45843	54.3315	157.847
BARI_DM	DNA	TcMar-Tc1	735.905	215.861	142.64	157.756
ERV38_MD-int	LTR	ERV1	266.858	42.1208	136.413	157.724
Mariner-14_SIn	DNA	DNA	273.478	59.2529	33.2593	157.472
AlRepC-847	Unknown	Unknown	986.737	115.791	393.557	157.303
AlRepE-1425	Unknown	Unknown	345.776	163.534	308.167	157.14
Gypsy6-I_DR	LTR	Gypsy	8.95744	2.79829	3.16463	157.105
EnSpm-14N1_DR	DNA	CMC-EnSpm	727.526	19.6674	282.799	156.801
Gypsy-128_AA-I	LTR	Gypsy	10.9121	16.6211	70.9088	156.622
DNA2-16_DR	DNA	DNA	273.709	234.59	249.63	156.546
Zator-3_CGi	DNA	Zator	128.2	57.665	34.7449	156.403
AlRepE-174	LTR	ERV1	60.6591	16.6241	55.2995	155.84
Mariner-8_LCh	DNA	DNA	595.633	112.986	225.859	155.597
AlRepC-22	Unknown	Unknown	590.127	276.61	261.393	155.53
REX1-4_XT	LINE	Rex-Babar	481.29	207.027	275.002	154.898
AlRepD-1840	Unknown	Unknown	482.309	62.2165	342.231	154.227
RNLTR11-int	LTR	ERVK	59.9462	31.8246	14.1389	153.868
HEL	RC	Helitron	28.9352	26.5351	81.1528	153.764
AlRepD-4270	LINE	L2	1094.39	671.384	585.32	153.067
BEL-13_Adi-I	LTR	Pao	11.9543	7.36198	13.0609	153.051
hAT-2n1_DR	DNA	hAT-Charlie	2492.54	164.099	189.397	152.966
AlRepD-1760	Unknown	Unknown	235.738	42.2614	129.61	152.615
AlRepC-1388	Unknown	Unknown	1107.6	289.653	477.744	152.315
Gypsy-166_AA-LTR	LTR	Gypsy	5.28683	12.7532	165.406	152.285
ERV1-1_LCh-I	LTR	LTR	20.2907	13.3684	273.197	151.788
Gypsy-101_AA-LTR	LTR	Gypsy	113.191	182.596	27.8807	151.036
AlRepD-3184	DNA	hAT	2371.18	614.488	450.98	150.581
Tc1-8_DR	DNA	TcMar-Tc1	317.805	74.2494	149.114	150.109
Gypsy37-I_AG	LTR	Gypsy	626.549	126.775	544.561	149.747
CR1-44_DR	LINE	L2	158.967	48.6696	125.42	149.586
LTR-14_Gav	LTR	ERV4	106.796	47.9358	115.216	149.548
AlRepE-1134	Unknown	Unknown	334.418	34.1748	135.883	149.203
AlRepE-528	Unknown	Unknown	21.2669	9.65833	48.4608	148.824
AlRepE-737	Unknown	Unknown	208.836	68.072	129.882	148.506
RLTR20C1_MM	LTR	ERVK	202.153	51.5879	29.271	148.149
AlRepE-6122	Unknown	Unknown	204.46	32.4109	40.2407	147.832
L2B-2_AAe	LINE	L2	207.625	14.4589	33.1039	147.423
AlRepD-1337	Unknown	Unknown	104.723	233.687	50.6552	147.055
AlRepE-1897	LINE	L2	439.949	107.835	34.1174	145.336
BEL-30_CQ-LTR	LTR	Pao	133.769	55.0651	21.1907	145.222
hAT-2_SM	DNA	hAT-Charlie	149.448	8.38555	223.092	145.096
AlRepD-609	Unknown	Unknown	221.344	155.044	103.738	144.784
AlRepD-4565	DNA	MULE-MuDR	1546.11	483.258	335.118	143.828
MER50-int	LTR	ERV1	111.977	8.16722	54.0207	143.55
BEL-593_AA-I	LTR	Pao	10.7009	2.39613	24.8257	143.271
AlRepC-223	LTR	ERV1	1731.76	1218.17	1539	142.892
Mariner-68_HSal	DNA	DNA	768.294	1317.33	140.235	142.588
R1-5_BM	LINE	R1	63.9905	56.9507	99.9353	142.057
BEL-20_AA-I	LTR	Pao	136.243	866.375	320.399	141.705
MOSAT-2_DR	Satellite	Satellite	94.9274	11.2813	86.0043	141.275
Dada-1_ON	DNA	Dada	25.0984	4.90276	14.7905	140.684
AlRepC-1121	Unknown	Unknown	389.882	245.681	123.858	140.546
TC1_TF	DNA	TcMar-Tc1	86.0555	22.2722	61.4961	140.197
AlRepA-66	DNA	hAT-Ac	3107.07	1062.1	786.596	139.348
AlRepE-843	DNA	CMC-EnSpm	330.072	121.774	308.645	138.453
CR1-J2_Pass	LINE	CR1	1.44801	73.6225	26.1743	138.058
Tc1DR3_Xt	DNA	TcMar-Tc1	326.328	286.046	135.517	137.662
Helitron-2_DVir	RC	Helitron	354.089	22.747	11.2503	137.171
AlRepD-590	Unknown	Unknown	377.155	76.5115	104.692	136.499
Rex1-21_DRe	LINE	Rex-Babar	397.586	372.664	166.294	135.068
AlRepD-1609	Unknown	Unknown	67.8569	254.28	82.5681	135.057
AlRepB-148	Unknown	Unknown	3558.56	966.52	998.877	133.803
Gypsy-2_TCa-I	LTR	Gypsy	10.6722	18.898	64.2691	133.254
DIRS-4_SP	LTR	DIRS	30.3691	1.73618	385.269	132.948
AlRepE-199	Unknown	Unknown	258.788	100.555	261.269	132.892
HAT1_DR	DNA	hAT-Ac	228.305	54.1969	145.682	132.883
EnSpm-10_HM	DNA	CMC-EnSpm	449.398	114.939	143.165	132.838
AlRepD-132	Unknown	Unknown	142.847	153.35	136.961	132.786
AlRepD-6317	Unknown	Unknown	346.907	96.932	341.474	131.997
AlRepD-3550	Unknown	Unknown	163.082	37.2732	84.0388	131.969
AlRepD-1147	Unknown	Unknown	272.874	286.413	211.772	130.503
AlRepD-1411	Unknown	Unknown	378.061	15.808	250.657	129.999
DNA5_Lch	DNA	DNA	41.7259	95.2698	103.047	129.247
Tc1-2_FR	DNA	TcMar-Tc1	995.383	722.62	452.65	128.519
AlRepE-1681	Unknown	Unknown	703.543	482.73	401.758	128.032
Tc1-4_DR	DNA	TcMar-Tc1	150.453	63.0295	293.492	127.733
AlRepE-2882	Unknown	Unknown	77.931	24.0524	69.1995	127.409
DNA-5-4_DR	DNA	DNA	235.647	47.9075	155.268	127.38
G4_DM	LINE	Jockey	0.741735	0	5.83285	126.846
BEL-9_LH-I	LTR	LTR	5.77079	0	8.7548	126.119
hAT-N50B_DR	DNA	hAT-Ac	295.392	113.067	129.434	126.093
Gypsy-7_PPc-I	LTR	Gypsy	83.6815	95.3334	104.952	126.044
Gypsy-27_GA-I	LTR	Gypsy	134.968	1.33902	55.9233	126.021
Gypsy-6_AA-I	LTR	Gypsy	237.664	277.935	68.6516	125.891
AlRepD-850	LINE	Rex-Babar	964.367	149.291	659.424	125.447
hAT-6B_PM	DNA	hAT-Charlie	74.6177	50.2335	103.455	124.016
L2B-4_AAe	LINE	L2	69.0221	24.9144	79.3847	123.976
BEL-232_AA-I	LTR	Pao	174.861	46.8591	53.4331	122.984
RNHAL1	LINE	L1	11.9046	10.4503	56.092	122.851
AlRepD-389	LINE	L2	1011.3	1441.01	444.801	122.831
AlRepD-1371	Unknown	Unknown	502.695	430.541	438.476	122.803
TZF28	DNA	TcMar-Tc1	20.0922	17.0125	22.228	122.18
L2-5_PM	LINE	L2	329.194	25.1219	717.123	121.321
DNA8-17_DR	DNA	DNA	1217.42	91.5774	452.6	121.309
Gypsy27-I_AG	LTR	Gypsy	111.726	36.5654	94.3314	121.054
L1-15a_Lch	LINE	LINE	11.1078	1.17237	26.3329	120.773
AlRepE-2393	DNA	hAT-Charlie	543.712	268.886	169.862	120.53
Mariner-9_DR	DNA	TcMar-Tc1	284.748	1033.42	316.923	120.063
AlRepC-1351	DNA	hAT-Ac	544.608	138.487	887.583	119.743
Kolobok-9_CGi	DNA	Kolobok-Hydra	1.62389	0	3.02011	119.714
AlRepE-1661	LTR	ERV1	178.262	770.016	119.331	119.692
CR1-24_DR	LINE	L2	135.25	128.774	55.5537	118.991
AlRepC-4392	LINE	Rex-Babar	512.832	273.764	236.527	118.689
Academ-1_GA	DNA	Academ	1130.92	368.151	566.336	118.476
AlRepD-2414	LTR	Gypsy	214.532	191.597	176.711	118.471
AlRepC-488	DNA	DNA	777.838	324.402	271.58	118.124
RMER17C-int	LTR	ERVK	2.5356	0	5.47026	117.549
AlRepD-1738	Unknown	Unknown	353.156	85.6052	86.0609	117.277
L1-43_ACar	LINE	L1	63.3649	16.3401	128.65	116.991
ERV6B-MD_I-int	LTR	ERV1	25.7641	65.3656	148.238	116.93
Harbinger-6_LCh	DNA	DNA	29.2028	1.52764	4.16409	116.805
AlRepE-541	Unknown	Unknown	943.344	215.393	1446.55	116.667
DNA-N4_DR	DNA	DNA	119.408	283.323	104.673	116.513
AlRepD-847	LINE	L2	8084.16	1025.68	113.754	115.736
Tx1-8_BF	LINE	L1-Tx1	11.5231	26.4638	7.07806	115.571
Mariner-79B_HSal	DNA	DNA	365.868	184.306	69.2055	114.638
AlRepD-163	Unknown	Unknown	937.68	480.62	921.428	114.542
Academ-5_SK	DNA	Academ	192.169	6.21308	55.6518	114.461
IS3EU-2_DR	DNA	IS3EU	118.544	23.2912	210.236	114.091
MER6A	DNA	TcMar-Tigger	132.668	149.264	141.662	113.553
SMAR26	DNA	TcMar-Mariner	3.09824	2.24053	0	112.475
CR1_Ele33	LINE	CR1	66.1607	2.84541	44.9277	112.435
DNA2-7_DR	DNA	DNA	189.952	43.5615	52.0433	112.287
AlRepE-305	Unknown	Unknown	65.12	17.9499	287.822	111.93
DIRS-8A_XT	LTR	DIRS	71.6346	2.33005	27.3548	111.645
Tx1-45_DR	LINE	L1-Tx1	59.1663	92.9536	41.1921	110.186
DNA-8-9_DR	DNA	hAT-Ac	1419.25	140.645	347.378	108.356
Gypsy11-I_DR	LTR	Gypsy	45.5899	8.71735	93.1501	108.303
AlRepD-2369	Unknown	Unknown	489.25	327.45	916.396	108.229
AlRepC-1270	Unknown	Unknown	569.369	81.7316	342.551	108.195
DNA-4-3_DR	DNA	DNA	1064.9	312.314	487.199	107.978
AlRepC-690	Unknown	Unknown	1842.34	426.903	1267.47	107.943
EnSpm-1_PM	DNA	CMC-EnSpm	207.974	123.433	472.918	107.605
BEL-137_AA-LTR	LTR	Pao	93.8968	3.70681	1.9147	107.467
AlRepC-733	DNA	hAT-Ac	383.125	107.726	285	107.344
hAT-22_HM	DNA	hAT-Tip100	111.263	37.5574	13.0829	106.903
ERV2-5_Pca-I	LTR	ERVK	45.9841	5.02113	568.586	106.821
Tc1-16_Xt	DNA	TcMar-Tc1	88.8177	186.261	339.518	106.282
DNA-TA-5_DR	DNA	TcMar-Tigger	1340.37	340.854	518.139	105.739
L2-3_DRe	LINE	L2	368.265	133.138	402.661	105.504
BEL-46_DRe-I	LTR	Pao	38.3245	15.5455	36.6845	105.461
AlRepE-2962	Unknown	Unknown	188.981	115.448	614.157	104.93
AlRepD-3030	Unknown	Unknown	556.481	152.83	530.834	104.654
AlRepD-4541	LINE	Rex-Babar	763.272	154.002	234.544	104.439
AlRepC-1442	DNA	hAT-Ac	2979.37	447.067	371.205	104.306
AlRepE-5091	Unknown	Unknown	459.92	352.181	154.778	103.699
AlRepD-991	Unknown	Unknown	112.94	159.531	282.988	101.935
hAT-N81_DR	DNA	hAT-Charlie	719.444	91.5801	82.6809	101.689
AlRepC-643	Unknown	Unknown	189.457	61.278	194.97	101.655
L1-1_DN	LINE	L1	37.2328	20.2789	25.9431	101.349
Rex1_FurC	LINE	Rex-Babar	1722.82	709.636	487.107	101.007
Gypsy-46_GA-I	LTR	Gypsy	50.3042	52.4345	91.2825	100.676
ERV1-9N-I_ML	LTR	ERV1	7349.96	281.457	3130.17	100.477
Polinton-1_LCh	DNA	DNA	46.9442	60.6225	68.4567	100.39
AlRepA-208	DNA	hAT-Charlie	711.611	408.058	219.527	100.193
AlRepC-136	DNA	hAT-Ac	2706.27	1013.97	856.435	99.8928
HERV16-int	LTR	ERVL	54.0311	4.44811	22.4215	99.844
HelitronN-1_DPe	RC	Helitron	315.397	26.9636	206.06	99.8169
Harbinger-2_XT	DNA	PIF-Harbinger	441.771	50.4063	275.376	99.4042
Daphne-27_DRe	LINE	L2	870.076	372.798	479.881	99.369
TDR3	DNA	hAT-Charlie	503.096	336.768	157.811	99.3632
Mariner-16_SIn	DNA	DNA	122.755	98.8613	38.2053	98.9917
AlRepD-1257	LINE	L2	1249.7	112.059	241.773	98.4563
BEL-5_DAn-LTR	LTR	Pao	47.2026	26.5201	19.588	98.3979
SINE_AFC	SINE	tRNA-Core-L2	1604.6	1841.34	405.178	97.9846
AlRepE-1600	LINE	L1-Tx1	396.946	253.659	448.405	97.1646
ERV3-1-I_XT	LTR	ERVL	36.2356	22.7103	27.7837	97.1086
RTE-29_CPB	LINE	RTE-BovB	195.589	412.89	106.043	97.0379
Zisupton-1_DR	DNA	Zisupton	288.575	475.355	532.185	96.9957
AlRepE-2096	Unknown	Unknown	110.535	648.359	411.527	96.2731
AlRepE-4191	Unknown	Unknown	46.4564	19.5123	22.2707	96.127
Harbinger-6_DR	DNA	PIF-Harbinger	24.0001	1.35244	20.4638	96.0464
TE-X-4_DR	Unknown	Unknown	214.501	102.231	89.2118	95.9093
L1-60_ACar	LINE	L1	49.7428	20.2111	55.7506	95.3806
Ronin2_I-int	LTR	Gypsy	1884.02	265.862	754.48	93.9087
Penelope-4_HM	LINE	Penelope	13.0979	2.22684	20.4025	93.8335
AlRepC-43	Unknown	Unknown	1299.6	280.013	514.316	93.6653
AlRepE-3579	Unknown	Unknown	568.488	108.927	192.855	93.6302
AlRepC-767	Unknown	Unknown	788.571	854.307	643.715	93.5246
AlRepD-2959	Unknown	Unknown	553.789	188.941	400.129	93.2366
Kolobok-3_Aplcal	DNA	Kolobok-Hydra	2059.1	102.296	137.228	92.9
AlRepC-625	DNA	TcMar-Tc2	1069.56	345.139	448.03	92.6486
AlRepD-1010	Unknown	Unknown	309.492	372.639	117.912	92.6167
CR1-Y_Pass	LINE	CR1	7.63999	9.82496	13.8091	92.4573
AlRepE-12844	LINE	Rex-Babar	276.328	199.643	350.101	92.3244
HERO-2_DR	LINE	R2-Hero	106.413	29.34	77.7439	92.2933
AlRepE-1008	Unknown	Unknown	73.4565	17.6731	164.126	92.2246
AlRepC-382	Unknown	Unknown	356.192	84.046	483.755	92.049
Dada-U1B_DR	DNA	Dada	29.2402	66.8055	31.1166	91.7675
Chapaev-6_HM	DNA	CMC-Chapaev	79.862	11.3658	40.3822	91.7512
Gypsy38-I_DR	LTR	Gypsy	9.14626	0	6.66254	91.348
IMPB_01	Satellite	Satellite	233.554	71.1901	83.1613	91.3291
AlRepE-2751	Unknown	Unknown	2337.19	321.987	313.427	91.1793
AlRepC-3064	Unknown	Unknown	378.702	88.2962	345.496	91.1525
hAT-6_DR	DNA	hAT-Ac	10.656	0	37.278	89.318
AlRepD-1030	DNA	hAT-Ac	675.243	192.439	220.944	89.1756
hAT-N70_DR	DNA	hAT	153.406	16.9107	27.9418	89.1599
DIRS-13_DR	LTR	DIRS	625.721	151.803	87.8174	89.0932
LTRX1-I_XT	LTR	Copia	23.1304	8.38794	20.5654	88.7828
Rex1-53_DR	LINE	Rex-Babar	13.3518	0	7.81341	88.675
Academ-5_SP	DNA	Academ	15.3524	4.24981	235.361	88.4431
TC1_FR4	DNA	TcMar-Tc1	533.054	289.844	577.231	88.3853
TTAA16_AP	DNA	DNA	108.445	26.0049	35.2004	87.9183
AlRepC-631	DNA	TcMar-Tc1	87.061	114.464	57.1504	87.8788
AlRepE-993	Unknown	Unknown	476.69	669.613	605.974	87.7824
AlRepD-6835	Unknown	Unknown	426.925	89.3464	197.24	87.7305
Mariner-25_LCh	DNA	DNA	26.4513	16.4486	29.5159	87.6414
CR1-1_CPB	LINE	CR1	230.776	522.378	475.575	87.5734
BEL-9_DWil-I	LTR	Pao	20.608	7.31314	28.0244	87.0417
L2-7_DRe	LINE	L2	198.924	18.6516	103.524	86.8393
Copia9-NVi_I-int	LTR	Copia	27.6659	5.55289	118.398	86.0973
RTEX-21_SK	LINE	RTE-X	70.0808	9.65334	68.9912	85.8766
AlRepD-1607	Unknown	Unknown	74.2624	305.919	261.17	85.3993
Gypsy-30_GA-I	LTR	ERV1	52.9372	25.9703	52.2475	85.3763
AlRepB-365	Unknown	Unknown	2061.87	521.638	936.035	85.0319
EnSpm-3_NVe	DNA	CMC-EnSpm	72.0981	19.9512	201.287	84.633
AlRepC-2318	Unknown	Unknown	1161.87	495.498	1139.96	84.3809
hAT-N68_DR	DNA	hAT-Ac	94.6083	7.30469	20.8581	84.313
AlRepD-4293	Unknown	Unknown	86.8928	48.7949	160.492	84.2382
AlRepD-1512	Unknown	Unknown	63.2701	15.118	139.458	83.1058
Tx1-5_SK	LINE	L1-Tx1	32.2776	20.1395	23.1331	82.8331
AlRepC-258	Unknown	Unknown	777.402	208.103	296.453	82.5081
SINE2-2_DR	SINE	tRNA-Mermaid	51.4504	16.8478	112.508	82.3789
Daphne-21_SPu	LINE	L2	20.8921	41.1996	7.4907	81.6987
Gypsy-24_PBa-I	LTR	LTR	14.5203	53.5723	89.4513	81.4994
AlRepC-891	LINE	L1	325.507	500.966	214.506	81.3692
AlRepE-234	Unknown	Unknown	9.63876	1.51393	8.95155	81.3663
LTR-12B1_Crp	LTR	ERV1	45.3968	17.9434	30.244	81.2985
Gypsy-10_OD-I	LTR	Gypsy	29.8226	194.432	43.9173	81.2628
AlRepC-87	Unknown	Unknown	314.34	137.774	243.196	81.2256
Gypsy-10_CPB-I	LTR	Gypsy	9.16604	16.5137	62.6515	81.2214
Nimb-12_DR	LINE	I	20.2148	10.2664	101.847	81.0377
Dada-U6_SS	DNA	Dada	106.169	14.6756	55.2465	80.8279
DNA7-N2_DR	DNA	hAT-hAT6	46.5754	12.6618	39.4292	80.7708
AlRepC-1114	DNA	CMC-EnSpm	782.473	594.412	848.135	80.6303
ERV1-5N-EC_I-int	LTR	ERV1	2.11499	0	0	80.2052
AlRepD-1017	DNA	DNA	103.044	69.4438	116.49	80.1721
AlRepE-2550	Unknown	Unknown	338.628	152.614	123.915	79.9832
Gypsy-28_DWil-I	LTR	Gypsy	6.27008	10.4216	12.5438	79.7616
AlRepE-1201	Unknown	Unknown	815.048	917.864	790.886	78.9705
Mariner-38B_SIn	DNA	DNA	48.5214	11.719	44.9406	78.4647
Gypsy25-I_AG	LTR	Gypsy	215.264	0	93.1137	78.445
AlRepD-528	RC	Helitron	420.232	161.574	259.937	78.3189
AlRepD-908	Unknown	Unknown	987.517	277.169	950.714	78.2427
AlRepD-727	DNA	hAT-Ac	9.37525	2.6962	6.76626	78.206
AlRepB-65	Unknown	Unknown	575.444	165.595	321.089	78.0689
MMERVK9E_I-int	LTR	ERVK	58.1627	20.6385	99.7594	77.7814
AlRepD-859	DNA	hAT-Charlie	326.188	67.5635	75.7658	77.7385
LIN4b_SM	LINE	R2	708.991	117.134	108.595	77.6201
AlRepD-5045	Unknown	Unknown	901.099	279.062	835.099	77.5667
Helitron-N1B_CGi	RC	Helitron	49.9499	19.0085	31.1476	77.5577
AlRepE-284	Unknown	Unknown	461.371	112.614	142.09	77.4877
Chapaev3-1_HR	DNA	CMC-Chapaev-3	59.5479	23.6605	435.113	77.1449
DNA2-10_CGi	DNA	DNA	1689.89	113.082	106.756	76.922
Gypsy-9_OD-I	LTR	Gypsy	46.4248	32.4166	78.3811	76.7045
Mariner-29_AEc	DNA	DNA	234.543	15.0966	68.4479	76.6578
Chaplin4_FR	DNA	hAT-Charlie	94.8834	63.8657	54.6756	76.4263
ERV1-2_Gav-I	LTR	ERV1	75.8598	28.1489	42.6843	76.3715
Dada-tL_DR	DNA	Dada	641.721	198.466	515.764	75.9011
EnSpm-7_DR	DNA	CMC-EnSpm	165.317	80.3051	115.496	75.8921
AlRepD-57	Unknown	Unknown	219.49	252.543	119.942	74.9627
MER49	LTR	ERV1	0.118215	1.25638	5.52762	74.9323
DNA-2-27_DR	DNA	DNA	26.3578	441.283	169.052	73.9041
BEL31-LTR_DR	LTR	Pao	17.636	21.6296	44.2004	73.7834
AlRepE-3023	Unknown	Unknown	338.773	289.077	130.512	73.7401
AlRepE-3364	Unknown	Unknown	367.939	39.3689	48.6617	73.5931
BEL-17_DEl-I	LTR	Pao	23.9999	42.6161	79.4342	73.5382
DNA-1-2_DR	DNA	DNA	131.061	46.2314	200.868	73.0655
LTR34	LTR	ERV1	23.296	7.95192	3.22227	73.0325
LTR-12D_Crp	LTR	ERV1	23.5689	57.7071	23.9902	72.8652
Daphne-6_SPu	LINE	L2	0.593318	0	172.474	72.3988
Tx1-12_Lch	LINE	LINE	156.219	13.595	78.4567	72.3704
Harbinger-N4_NV	DNA	PIF-Harbinger	84.7587	11.2474	0	72.3641
AlRepD-886	Unknown	Unknown	170.43	37.2647	81.4409	72.2812
Mariner-N14_DR	DNA	TcMar-Tigger	1144.34	176.05	398.668	71.8281
AlRepD-12181	Unknown	Unknown	430.95	58.8551	301.809	71.5703
CER15-1-I_CE	LTR	Pao	9.69231	3.94795	4.86071	71.2044
AlRepD-337	DNA	TcMar-Tc2	785.071	238.571	649.7	70.88
Mariner-28_DF	DNA	TcMar-Tc1	11.8116	9.5044	9.68853	70.4776
L1-50_DR	LINE	L1	534.552	124.556	185.161	70.4099
Kolobok-12_CGi	DNA	DNA	96.8669	95.6684	151.22	69.6049
Mariner-35_SM	DNA	TcMar-Pogo	12.6956	6.79676	16.8263	69.4636
DNA3-10_CGi	DNA	DNA	29.5879	38.0017	8.58237	69.3609
I-3_DR	LINE	I	11.3707	20.0017	16.7444	68.7701
AlRepD-2195	Unknown	Unknown	64.7187	20.9716	49.4153	68.6283
L1-66_DR	LINE	L1	278.14	43.3616	70.934	68.628
AlRepD-577	Unknown	Unknown	253.02	34.8203	232.344	68.2404
ERV-2_Crp-LTR	LTR	ERV1	49.5535	19.3328	75.993	68.0221
Gypsy120-I_DR	LTR	Gypsy	96.2205	12.1333	18.1548	67.9893
Tx1-3_DR	LINE	L1-Tx1	4.32359	1.48456	19.5628	67.8432
Penelope-13_HM	LINE	Penelope	31.6434	31.2362	49.0933	67.8163
EnSpm-1_BF	DNA	CMC-EnSpm	4.65794	0.918813	5.48175	67.626
ERV1-N7-I_DR	LTR	ERV1	1016.18	202.969	136.344	67.575
AlRepE-1615	DNA	CMC-EnSpm	87.4254	21.6895	107.097	67.3465
AlRepC-895	DNA	TcMar-Tc1	838.212	1016.07	2870.94	67.2176
AlRepE-2559	DNA	TcMar-Tc1	1652.55	22.8528	76.4199	66.8342
SAT-1_AMi	Satellite	Satellite	51.5236	19.4452	103.612	66.1694
L2-11_DRe	LINE	L2	577.299	109.371	69.8767	66.1232
AlRepD-970	LINE	L2	122.267	122.853	112.297	65.698
AlRepD-2424	LINE	L2	169.339	19.8469	64.7677	64.8298
BEL4-I_AG	LTR	Pao	53.615	34.1003	120.48	64.6072
L1-32_XT	LINE	L1	18.6194	2.94841	44.4212	64.5779
AlRepD-8195	Unknown	Unknown	33.6949	38.1273	26.3124	64.4383
Nimb-1_DR	LINE	I	445.666	312.371	265.246	64.4021
Gypsy-43_CGi-I	LTR	Gypsy	118	10.6451	37.2559	64.3623
AlRepC-505	DNA	hAT-Charlie	1375.97	623.892	411.135	64.1452
hAT-N7_BF	DNA	hAT-Ac	124.477	10.3669	67.0169	63.9778
AlRepD-1715	Unknown	Unknown	188.611	161.933	69.574	63.9593
AlRepE-182	Unknown	Unknown	45.8967	80.4737	258.876	63.9307
Tx1-10_AMi	LINE	L1-Tx1	39.1853	18.6196	35.3974	63.8253
AlRepE-2401	DNA	PIF-Harbinger	253.307	161.921	76.3839	63.4321
MSAT_MG	Satellite	Satellite	49.7086	6.32675	21.2218	63.3389
AlRepD-297	Unknown	Unknown	612.845	227.208	287.249	63.0342
CR1-89_HM	LINE	CR1	276.067	436.911	1855.89	62.6999
AlRepC-436	DNA	hAT-Ac	788.373	392.189	1833.42	62.6755
BEL-48_AA-I	LTR	Pao	79.4331	118.716	303.009	62.6704
AlRepE-1352	Unknown	Unknown	99.2067	21.6587	57.5045	62.6112
AlRepE-98	Unknown	Unknown	230.019	27.2525	91.0434	62.4923
BEL-47_DRe-I	LTR	Pao	18.8437	2.57824	27.5298	62.4913
Mariner-3_NV	DNA	TcMar-ISRm11	3.73576	13.7294	12.2851	62.4478
AlRepC-959	DNA	hAT-Ac	780.385	334.141	409.337	62.0584
L2-5_NVi	LINE	L2	105.382	70.0463	34.1213	62.0419
AlRepC-91	DNA	TcMar-Tc2	868.424	205.029	353.999	61.8436
AlRepC-736	DNA	PIF-Harbinger	185.93	52.7063	103.554	61.5049
AlRepD-195	Unknown	Unknown	215.337	247.341	249.207	61.4006
Tc1-6_DR	DNA	TcMar-Tc1	903.596	339.527	324.066	61.3605
AlRepD-1256	DNA	DNA	306.297	147.411	115.541	61.1024
CR1-16_BF	LINE	CR1	3.67908	0	8.03596	60.9061
RTEX-19_SK	LINE	RTE-X	7.57556	0	3.91214	60.7458
L2-17_NV	LINE	L2	42.2195	3.05527	67.0366	60.6083
Jockey-13_AAe	LINE	Jockey	290.771	15.4925	72.528	60.5551
L2-14_DRe	LINE	L2	413.865	127.517	410.144	60.0503
hATm-3_AA	DNA	hAT-hATm	83.3869	37.0298	32.2224	60.0084
Gypsy-54_GA-I	LTR	Gypsy	25.6774	243.853	73.2208	59.9691
AlRepD-1719	LINE	L2	399.19	217.591	303.56	59.9325
AlRepD-488	Unknown	Unknown	153.336	64.306	32.6595	59.6235
DNAX-24B_DR	DNA	DNA	248.615	23.2317	265.151	59.3721
DNA-X-13_DR	DNA	DNA	33.4395	12.8348	4.7468	59.3452
AlRepE-2572	Unknown	Unknown	370.222	1174.49	126.279	59.1927
DNA9-2_AAe	DNA	MULE-MuDR	126.928	137.649	153.521	59.1799
AlRepD-2838	Unknown	Unknown	177.077	12.4294	27.2517	59.1683
EnSpm-22_HMa	DNA	CMC-EnSpm	58.5314	59.0239	67.6967	59.0703
Gypsy80-I_DR	LTR	Gypsy	158.477	14.9218	0	59.0449
AlRepB-383	DNA	TcMar-Tc1	920.712	352.35	435.368	58.9562
AlRepC-659	Unknown	Unknown	370.425	112.903	191.273	58.8601
AlRepD-2705	Unknown	Unknown	266.435	50.3193	175.344	58.7584
DIRS-13C_XT	LTR	DIRS	29.3755	83.0771	17.2435	58.6548
AlRepC-162	SINE	MIR	101.49	86.8691	89.1051	58.1509
AlRepD-4248	DNA	hAT-Ac	508.888	158.788	252.266	58.009
Polinton-1_CPB	DNA	Maverick	137.225	33.597	163.119	57.6037
hAT-1_LMi	DNA	hAT-Tip100	20.1491	33.3202	73.157	57.4297
L1MdGf_I	LINE	L1	22.3978	9.81757	29.7997	57.0121
HE1_SINE	SINE	tRNA-V-CR1	598.662	183.365	94.743	56.9302
L1-79_DR	LINE	L1	110.845	26.5088	72.5382	56.8371
Copia-11H_DR-LTR	LTR	Gypsy	397.896	7.28967	30.3565	56.6233
DIRS-16_DR	LTR	Ngaro	1.02308	6.57942	8.93923	56.4664
HarbingerN4_DR	DNA	PIF-Harbinger	316.167	22.369	52.4848	56.4318
REX5	LINE	L2	484.16	82.4315	251.647	56.4119
LOOPERN3B_DR	DNA	Kolobok-T2	127.74	6.42081	46.5923	56.1303
hAT-24_LMi	DNA	hAT-Tip100	49.2739	36.978	17.9311	56.123
AlRepD-586	LINE	Rex-Babar	322.519	143.541	292.446	56.0702
AlRepE-4384	LINE	Rex-Babar	100.149	92.6052	80.116	56.0157
L1-1_Vpa	LINE	L1	57.9058	71.3623	32.5361	55.9703
EnSpm-16_DR	DNA	CMC-EnSpm	293.764	150.954	337.11	55.7587
CR1_Ele24	LINE	CR1	15.7078	49.0231	169.553	55.3381
BEL-7_DPu-I	LTR	Pao	39.7622	8.08734	0	54.8206
AlRepD-2405	LINE	L2	70.0844	24.674	78.2041	54.5786
Gypsy148-LTRb_DR	LTR	Gypsy	4.61255	4.90806	1.71508	54.4346
AlRepD-2942	LINE	L2	391.442	329.099	41.2397	54.168
CASAT_HD	Satellite	Satellite	1145.12	131.216	399.146	54.0011
piggyBac-5_CGi	DNA	PiggyBac	17.2098	5.47329	4.13309	53.7867
BtERVF1_I-int	LTR	ERV1	11.0996	10.5785	20.8073	53.7357
DIRS-4_DR	LTR	Ngaro	97.7456	61.2968	26.5031	53.6426
AlRepD-826	DNA	DNA	685.684	94.7159	3795.22	53.6328
AlRepD-1948	DNA	hAT-hAT5	91.2702	46.4758	74.2415	53.631
Gypsy-22_GA-I	LTR	Gypsy	56.9054	164.681	675.676	53.6273
DNA8-15_CQ	DNA	DNA	50.6026	6.1857	23.9584	53.44
L2-1_SIn	LINE	LINE	36.0779	11.5285	57.1731	53.2275
Gypsy-20-I_NV	LTR	Gypsy	15.8335	17.8129	27.5194	53.1618
AlRepE-891	Unknown	Unknown	177.28	79.4253	10665.8	52.5082
AlRepD-7900	LINE	R2-Hero	2037.52	164.665	879.941	52.4995
RT2	LINE	R1	81.7077	11.0074	49.144	52.4978
L2-44_DR	LINE	L2	744.902	183.942	353.518	52.4487
Gypsy15-I_SP	LTR	Gypsy	10.011	32.0019	25.9445	52.4159
AlRepD-74	DNA	PIF-Harbinger	310.632	46.0438	129.323	52.3524
IMPB_02	Satellite	Satellite	78.3893	34.956	63.436	52.2829
AlRepD-5347	Unknown	Unknown	43.8242	13.5222	5.53566	52.2571
hAT-13_DR	DNA	hAT-Tip100	566.217	16.8894	122.323	52.2199
Polinton-3_TC	DNA	Maverick	42.8421	64.9702	14.8989	52.216
L1-1D_Cpo	LINE	L1	6.82521	2.23966	4.66326	52.0369
Gypsy-13_DBi-I	LTR	Gypsy	2.61458	13.3557	0.368584	51.977
BEL-609_AA-I	LTR	Pao	35.2308	17.9689	131.679	51.9101
AlRepD-1644	Unknown	Unknown	123.238	55.8567	46.4029	51.8991
MMERVK9C_I-int	LTR	ERVK	31.8059	49.6197	249.408	51.3937
L1-3_TS	LINE	L1	11.3051	58.6143	40.125	51.0035
DIRS-8_DR	LTR	Ngaro	133.339	26.6557	126.313	50.9997
AlRepC-132	DNA	DNA	374.633	71.083	195.06	50.5976
LTR12B_Tbel	LTR	ERV1	12.6093	20.3656	107.741	50.3268
SMAR9	DNA	TcMar-Tigger	270.217	11.8031	33.9526	50.2479
Gypsy-5_DKi-I	LTR	Gypsy	11.9705	0.656633	8.77731	50.0149
ERV1-1-I_Lch	LTR	LTR	21.3949	17.1813	13.505	49.8411
tRNA-Pro-CCA	tRNA	tRNA	15.9476	0	5.98241	49.8031
hAT-16_LMi	DNA	hAT-Blackjack	189.382	371.917	276.123	49.6505
P-27_HM	DNA	P	43.2585	51.8556	108.886	49.6149
Gypsy124-I_DR	LTR	Gypsy	37.1942	9.38415	149.819	49.6032
AlRepC-394	DNA	hAT-Tol2	108.227	28.6767	80.7416	49.5807
L1-45_AAe	LINE	L1	128.771	30.0672	18.4613	49.1582
Gypsy-13_GA-I	LTR	Gypsy	19.3287	6.60971	25.3451	49.0144
Merlin-1_DR	DNA	Merlin	242.152	90.1267	79.2761	48.7739
BEL-4_DWil-I	LTR	Pao	5.61189	24.7014	50.4328	48.7299
L1-2_CPB	LINE	L1	83.1068	4.50107	48.6933	48.7187
AlRepE-715	Unknown	Unknown	369.975	79.327	1334.94	48.6857
RTEX-1_BF	LINE	RTE-X	20.6513	10.649	26.3896	48.4534
Tx1-1_DPu	LINE	L1-Tx1	1.60987	0.240457	1.09537	48.3664
Gypsy-34_GA-LTR	LTR	Gypsy	135.359	140.998	372.942	48.0855
AlRepB-392	DNA	hAT-Charlie	351.642	132.405	352.916	47.9929
Copia-45_AA-LTR	LTR	Copia	44.9217	15.4312	68.9174	47.7311
Ginger1-1_DR	DNA	Ginger	158.163	19.2054	74.4159	47.6348
Gypsy120-LTR_DR	LTR	Gypsy	565.245	99.5839	76.8518	47.2464
Polinton-5_NV	DNA	Maverick	22.9577	21.7016	58.9512	47.234
AlRepD-2258	DNA	hAT-Ac	111.833	77.9496	49.3776	47.0511
AlRepD-1832	Unknown	Unknown	363.954	23.3087	77.8274	46.9697
Polinton1_SM	DNA	Maverick	60.7578	12.9555	20.263	46.9524
Copia-2_Ano-I	LTR	Copia	8.50767	0	7.198	46.8173
AlRepE-180	Unknown	Unknown	154.723	67.9603	76.4604	46.7891
Gypsy-23-I_DR	LTR	Gypsy	46.8996	1.53272	30.8723	46.6974
hAT-14_HM	DNA	hAT-Ac	35.3396	14.9554	78.7882	46.6734
AlRepD-4032	DNA	hAT-Ac	437.95	164.554	166.769	46.5962
AlRepD-1120	Unknown	Unknown	155.285	32.8357	44.8876	46.5019
TC2_FR3A	DNA	TcMar-Tc2	124.017	76.0513	290.34	46.4801
L1-1_DR	LINE	L1	407.857	199.792	101.469	46.4289
Chaplin8_FR	DNA	hAT-Charlie	174.645	309.192	38.3019	46.4063
AlRepC-1303	Unknown	Unknown	644.102	155.159	145.456	46.2631
L2-51_DR	LINE	L2	411.083	190.134	133.284	46.1814
DIRS-1E-LTR_DR	LTR	Ngaro	128.802	42.4299	45.9423	46.1517
Helitron-3N3_PM	RC	Helitron	319.04	142.958	164.604	46.1479
Jockey-3_DVi	LINE	Jockey	4.98852	4.27867	0	46.0953
Mariner-13_SIn	DNA	DNA	27.3774	10.6511	41.531	46.0306
Polinton-2_NV	DNA	Maverick	75.5181	60.1578	49.3997	45.9673
Mariner-10_DR	DNA	TcMar-Tc1	60.3987	40.8742	98.1299	45.8617
Gypsy5_I-int	LTR	Gypsy	11.4576	173.473	36.0276	45.8178
Gypsy19-I_SP	LTR	Gypsy	11.1485	1.07259	10.7045	45.6925
CarERV2-int	LTR	ERV1	0.567769	48.6444	9.64083	45.6774
SFV1-16_Gav-I	LTR	ERV4	104.357	27.4765	212.708	45.506
AlRepD-2463	Unknown	Unknown	213.859	95.9701	112.118	45.3594
Gypsy-12_LH-I	LTR	LTR	5.83396	0.595417	1.75584	45.1653
AlRepD-2481	Unknown	Unknown	129.305	87.3774	154.511	44.9769
AlRepE-2032	Unknown	Unknown	21.6505	11.2961	55.6905	44.9669
hAT-57_HM	DNA	hAT-hATm	27.1883	2.78759	324.667	44.9344
Dada-tA_OL	DNA	Dada	527.603	86.5235	101.246	44.8577
AlRepE-5455	LINE	L1-Tx1	956.46	468.832	216.804	44.5987
Gypsy-9_Crp-I	LTR	Gypsy	33.542	65.6744	43.0782	44.4714
Gypsy-213_AA-I	LTR	Gypsy	26.754	2.32781	75.8705	44.446
AlRepE-262	DNA	hAT-Tip100	119.281	108.972	72.8424	44.315
Rex1-3_FR	LINE	Rex-Babar	577.663	344.003	369.642	44.1102
AlRepC-1084	LINE	Rex-Babar	331.682	149.223	130.055	44.1022
AlRepD-1119	LINE	L2	306.1	83.2715	252.177	44.0293
L1-10_DR	LINE	L1	69.1477	4.63452	25.3915	43.9978
AlRepD-645	DNA	hAT-Ac	403.25	79.3558	81.3259	43.9769
Gypsy61-I_AG	LTR	Gypsy	34.1543	28.2278	271.241	43.8891
Dada-1_NV	DNA	Dada	31.0683	9.09818	36.8101	43.8747
P-15_HM	DNA	P	138.207	6.3203	87.9193	43.6399
Transib-10_HM	DNA	CMC-Transib	15.6423	97.4663	13.5679	43.4913
REX1-5_DR	LINE	Rex-Babar	350.553	60.5605	471.817	43.3543
Tx1-13_CGi	LINE	L1-Tx1	8.07047	27.0855	4.16822	43.1243
AlRepD-1716	LTR	Gypsy	242.821	94.0155	123.8	43.0365
AlRepD-808	DNA	PIF-Harbinger	334.654	274.808	453.254	42.5846
GypsOL-int	LTR	Gypsy	125.487	35.6874	101.27	42.4911
Tigger17	DNA	TcMar-Tigger	26.3488	0	22.1312	42.3862
ISFUN1	RC	Helitron	994.414	0	7.21985	42.2729
AlRepC-1033	DNA	PIF-Harbinger	545.032	294.161	163.343	42.1586
AlRepE-257	DNA	TcMar-ISRm11	182.657	843.594	53.7417	42.1584
AlRepD-4	Unknown	Unknown	752.034	254.948	302.355	41.9469
R1-4_DWi	LINE	R1	27.0995	10.3904	44.2432	41.8001
HAT4_CI	DNA	hAT-Ac	6.80051	4.70278	10.3535	41.7192
MonoRep204	Segmental	Segmental	63.8663	17.0176	11.6193	41.7102
L2-23_ACar	LINE	L2	174.165	13.5069	51.9705	41.4068
AlRepE-3334	DNA	PIF-Harbinger	244.79	40.9028	238.421	41.3223
TDR8C	DNA	DNA	47.1613	6.88082	50.3129	40.8126
AlRepE-1530	Unknown	Unknown	281.575	27.483	95.3972	40.8036
AlRepD-1712	Unknown	Unknown	165.069	156.469	77.2097	40.7059
Gypsy1-NVi_I-int	LTR	Gypsy	150.935	207.579	72.6419	40.6863
Waldo-2_AAe	LINE	R1	16.5652	2.11319	5.40078	40.6582
EnSpm-14_DR	DNA	CMC-EnSpm	337.862	175.009	1546.87	40.5821
CR1-1_DVi	LINE	CR1	152.035	9.59619	21.1994	40.5599
AlRepD-1284	LTR	ERV1	83.5054	281.285	102.525	40.3888
AlRepD-499	Unknown	Unknown	81.4291	24.1442	467.619	40.1856
CR1-66_HM	LINE	L2	155.177	49.2829	332.819	40.1061
TguLTRL2a7	LTR	ERVL	11.1922	3.70612	33.9478	40.0565
CR1-76_HM	LINE	CR1	23.1948	4.21778	24.3107	39.9807
AlRepE-1110	Unknown	Unknown	155.747	47.4297	1271.33	39.9442
AlRepD-6972	Unknown	Unknown	489.312	1417.24	206.763	39.8835
AlRepD-210	LTR	DIRS	1199.66	255.865	148.523	39.8646
LTR4_Str	LTR	ERVK	41.3539	40.1288	33.3475	39.8011
Gypsy-27_CPB-I	LTR	Gypsy	0	1.70724	0	39.7024
HE1_HJ	SINE	tRNA-V-CR1	154.156	31.1705	26.7671	39.6778
Ginger1-N1_DR	DNA	Ginger	224.964	38.1174	44.7634	39.5878
L1-32_DR	LINE	L1	378.5	82.421	76.0594	39.5785
AlRepB-161	LINE	RTE-BovB	550.088	102.037	156.474	39.0501
Harbinger-N2_NV	DNA	PIF-Harbinger	7.24319	6.72678	17.3195	38.9899
DNA-2-32_DR	DNA	DNA	91.5069	12.8869	15.0837	38.7109
Gypsy-213_DR-LTR	LTR	Gypsy	15.1419	22.1239	105.573	38.6925
LTR-1B_NV	LTR	LTR	59.09	129.156	44.4274	38.5931
Outcast-1_DT	LINE	Jockey	0.564076	2.90276	2.66912	38.5251
L2-25_ACar	LINE	L2	372.684	169.969	98.07	38.463
I-1_DR	LINE	I	127.363	32.9396	99.9472	38.3425
Academ-1_CGi	DNA	Academ	12.5609	3.52345	22.5709	38.3405
AlRepD-520	Unknown	Unknown	121.797	92.28	89.775	38.3383
BEL-6_Ano-I	LTR	Pao	50.4747	6.16701	1.29028	38.1966
AlRepE-385	Unknown	Unknown	318.933	84.6514	77.3943	38.1928
AlRepE-7251	Unknown	Unknown	178.099	60.144	90.6691	38.1056
AlRepD-1283	LTR	ERV1	76.2247	130.781	447.68	38.0762
L2_Plat1i	LINE	L2	65.7519	34.8626	162.968	38.0065
AlRepC-702	Unknown	Unknown	3002.46	275.725	204.974	37.9972
AlRepD-259	DNA	PiggyBac	114.998	31.7803	72.5186	37.9537
AlRepC-66	DNA	PIF-Harbinger	366.453	205.544	168.362	37.9069
BEL-33_AA-I	LTR	Pao	31.7653	3.3761	20.3037	37.7285
Gypsy152-I_DR	LTR	Gypsy	7.4416	2.22684	167.644	37.7143
Ginger2-1_LS	DNA	Ginger	97.6294	32.1295	1131.61	37.649
Gypsy-68_AA-LTR	LTR	Gypsy	32.613	19.5134	95.2158	37.6214
Gypsy-8_CPB-I	LTR	Gypsy	5.69256	62.9093	0	37.5569
AlRepE-235	Unknown	Unknown	320.158	51.7089	19.8421	37.5491
DIRS-23_XT	LTR	DIRS	9.75427	0	2.0449	37.5047
BEL-3-I_XT	LTR	Pao	17.7562	2.36423	13.1755	37.4051
ONREP	Satellite	Satellite	12.1055	4.6162	2.50875	37.3835
L1MdF_II	LINE	L1	0.168946	0	1.40938	37.3754
Helitron-6_CGi	RC	Helitron	17.86	11.5458	37.4546	37.0477
CR1-80_HM	LINE	L2	29.5077	1.79719	33.2138	36.9452
AlRepD-2531	Unknown	Unknown	92.9648	33.8864	115.742	36.7215
AlRepC-286	DNA	hAT-Ac	457.667	231.271	153.07	36.6752
Academ-1_PM	DNA	Academ	20.1813	8.86314	24.637	36.6709
AlRepD-934	Unknown	Unknown	62.6503	32.6597	78.0555	36.6671
Mariner-2_DR	DNA	TcMar-Tc1	123.92	56.896	33.1881	36.5856
TDR17B	DNA	Sola	199.359	192.235	220.18	36.5806
AlRepD-818	Unknown	Unknown	154.432	113.614	174.208	36.5325
ERV1-2-I_BT	LTR	ERV1	14.862	5.08904	9.91075	36.4057
Gypsy-23-I_NVi	LTR	Gypsy	50.5937	23.2848	18.236	36.3598
AlRepE-445	Unknown	Unknown	58.5642	18.6894	61.2807	36.3411
hAT-N106_DR	DNA	hAT	172.852	16.9144	47.619	36.0019
AlRepD-5654	Unknown	Unknown	121.41	27.4823	118.275	35.9637
BEL-13_DEl-I	LTR	Pao	10.7359	3.80843	10.7541	35.8635
Mariner-17_AEc	DNA	DNA	68.7239	17.1244	49.8518	35.8431
Gypsy-8_DPer-LTR	LTR	Gypsy	42.6757	1.1589	31.8881	35.6099
AlRepD-2046	Unknown	Unknown	9.65682	2.93546	8.06331	35.4669
ERV1-N6-I_DR	LTR	ERV1	774.004	129.131	1119.62	35.3888
AlRepD-3275	DNA	hAT-Ac	908.787	276.598	933.989	35.2831
Gypsy105-I_Dr	LTR	Gypsy	7.95453	2.54523	2.50875	35.2505
AlRepE-2717	Unknown	Unknown	457.895	81.2785	62.598	35.0674
AmnL2-1	LINE	L2	14.1312	4.70857	27.8534	35.0651
TCB2	DNA	TcMar-Tc1	6.51521	0	0	34.9566
Tigger3b	DNA	TcMar-Tigger	18.6106	21.0851	5.37077	34.9088
MdoERV2-int	LTR	ERV1	70.4376	638.242	235.095	34.841
DNA9TA1_DR	DNA	CMC-EnSpm	379.637	564.102	54.7916	34.729
Jockey-3_DF	LINE	Jockey	0	0	0	34.5227
CR1-59_AAe	LINE	CR1	11.9809	7.52058	2.47382	34.4936
DNA-2-18_DR	DNA	CMC-EnSpm	267.036	166.1	98.6736	34.3887
Gypsy9-I_SP	LTR	Gypsy	20.7181	0.969133	7.87478	34.3489
L1-75_DR	LINE	L1	222.312	60.3047	170.146	34.3136
BEL-10_GA-I	LTR	Pao	14.6387	4.81762	9.23027	34.2813
hAT-2_AC	DNA	hAT-Charlie	49.6593	2.77881	16.8022	34.2158
Ronin3_I-int	LTR	Gypsy	437.073	296.84	40.4388	34.0743
LTR176A3_MD	LTR	ERV1	16.8708	4.90012	15.2513	33.7277
AlRepE-1373	Unknown	Unknown	85.4609	69.9397	49.3692	33.3598
Gypsy-233_DR-I	LTR	Gypsy	78.4455	7.96052	205.259	33.3329
Chapaev3-2_PM	DNA	CMC-Chapaev-3	60.674	18.8613	48.3827	33.3094
AlRepD-755	Unknown	Unknown	31.3599	12.926	21.7981	33.2136
AlRepD-1402	DNA	hAT-Ac	143.15	70.2665	65.4032	33.1046
Mariner-3_OL	DNA	TcMar-ISRm11	243.167	102.434	200.681	33.0318
Gypsy-21_DAn-LTR	LTR	Gypsy	16.3978	1.19006	1.84106	33.0038
Mariner-14_LCh	DNA	DNA	2238.34	91.6588	227.849	32.8036
AlRepD-6245	Unknown	Unknown	54.7592	91.5515	28.2051	32.7841
AlRepC-270	Unknown	Unknown	625.254	207.093	342.978	32.7772
RTE-1_AFC	LINE	RTE-BovB	106.263	24.5898	51.2546	32.769
AlRepE-684	LTR	Gypsy	207.766	168.92	142.74	32.7305
AlRepD-2769	DNA	CMC-EnSpm	1244.69	391.875	265.4	32.6288
Mariner-39_HM	DNA	TcMar-Fot1	18.3961	5.46534	9.1341	32.6135
EnSpm-17_DR	DNA	CMC-EnSpm	80.6658	38.9621	224.733	32.522
RTE_Ele2	LINE	RTE-BovB	1.19194	0	4735.74	32.3332
AlRepD-143	Unknown	Unknown	288.985	27.411	153.717	32.3241
Expander2	LINE	RTE	140.495	55.5733	31.6514	32.2412
MARINER60_CB	DNA	TcMar-Tc4	9.24853	2.5206	1.94428	32.2259
Polinton-1N1_DR	DNA	Maverick	427.864	85.2982	611.965	32.1383
hATm-27_HM	DNA	hAT-hATm	4.45462	0	8.78311	32.1141
AlRepC-2606	Unknown	Unknown	208.779	212.463	125.597	32.0842
Gypsy-6_CFl-I	LTR	LTR	13.2838	65.3491	43.8572	31.9907
DIRS-1C_CPB	LTR	DIRS	15.152	3.27284	7.86657	31.9159
SART-1_LHu	LINE	LINE	23.855	27.5947	43.0267	31.8216
BEL-176_AA-I	LTR	Pao	0.77737	0.0691192	1.48003	31.6478
Kolobok-18_HM	DNA	Kolobok-Hydra	63.3189	55.2658	58.5178	31.5305
AlRepD-46	Unknown	Unknown	254.507	207.949	61.4999	31.4411
L1-8_DR	LINE	L1	36.0763	5.52377	18.7677	31.4058
EnSpm-N2_DR	DNA	CMC-EnSpm	197.028	35.6548	21.3266	31.251
hAT-18_Crp	DNA	hAT-Charlie	2.58399	11.5023	25.5056	31.1752
ERV1_MD_I-int	LTR	ERVK	36.8124	18.9346	14.054	31.1597
AlRepE-5053	Unknown	Unknown	124.558	21.0666	63.9408	31.1539
Harbinger-3_DR	DNA	PIF-Harbinger	51.0909	7.49522	17.9616	31.0076
Gypsy-71_AA-I	LTR	Gypsy	1.95849	0	0	30.9799
R7Ag2	LINE	R1	227.114	26.4578	42.8874	30.8805
Jockey-7_DAn	LINE	Jockey	115.169	1.70724	16.5645	30.88
Gypsy-63_CQ-I	LTR	Gypsy	8.35815	5.96023	36.3157	30.8745
AlRepE-1839	Unknown	Unknown	59.6142	23.34	55.126	30.8698
Chapaev-3_NV	DNA	CMC-Chapaev	30.2392	7.39533	37.6714	30.8271
ERV-3_Crp-I	LTR	ERV1	2.28697	10.7172	53.1642	30.7678
R1-2_DEl	LINE	R1	6.739	14.0258	11.3157	30.7271
AlRepE-1436	DNA	hAT-Blackjack	18.5809	10.2662	46.1999	30.6191
Gypsy-6_PBa-I	LTR	LTR	7.05255	137.29	123.999	30.6043
AlRepD-763	DNA	TcMar-ISRm11	185.637	15.4769	102.652	30.4127
BEL-40_AA-I	LTR	Pao	5.47535	5.93381	64.682	30.3787
AlRepC-102	DNA	TcMar-Tc1	373.149	108.672	178.439	30.0846
Tc1-8B_DR	DNA	TcMar-Tc1	126.093	54.3333	26.6897	30.0655
Zator-3_AAe	DNA	Zator	0.138107	0	1.76173	29.9943
AlRepD-3555	Unknown	Unknown	10.8884	4.61	37.7845	29.9709
Gypsy-34_DEl-I	LTR	Gypsy	88.5136	9.60216	7.56412	29.5529
HAL1-5_Cho	LINE	L1	16.8853	12.3872	137.13	29.5151
TE-X-10_DR	DNA	TcMar-Tc1	188.621	17.0548	5.65115	29.4297
Tx1-38_DR	LINE	L1-Tx1	445.901	253.924	141.694	29.3271
REX1-7_DR	LINE	Rex-Babar	509.355	92.1603	33.8996	29.2659
BEL-50_CQ-I	LTR	Pao	28.3097	30.7959	97.3443	29.2086
AlRepD-134	Unknown	Unknown	10.0422	2.94525	6.28958	29.2036
AlRepE-3564	LINE	L1	44.2426	25.8999	92.2437	29.156
L1-25_DR	LINE	L1	55.7921	15.6565	100.938	29.1545
L1-65_DR	LINE	L1	156.084	88.0442	244.057	29.0233
AlRepD-2514	Unknown	Unknown	53.4615	47.6953	56.9205	28.961
EnSpm-15_DR	DNA	CMC-EnSpm	201.001	118.628	988.42	28.8636
Gypsy-31_SI-I	LTR	LTR	126.427	2.57697	1.72849	28.7786
CEMUDR2	DNA	MULE-MuDR	4.25346	0	42.6358	28.6275
AlRepD-1964	Unknown	Unknown	246.795	55.778	1987.75	28.4896
Gypsy-19-I_DR	LTR	Gypsy	166.55	25.6804	127.438	28.4282
DNA-1-7_DR	DNA	PIF-Harbinger	121.16	14.4376	13.026	28.2218
AlRepC-1568	Unknown	Unknown	2586.37	350.8	222.771	28.198
Gypsy-37_CQ-I	LTR	Gypsy	89.0088	15.8871	27.386	28.1451
Bridge1_FR	LINE	Penelope	338.53	70.329	510.633	28.1214
AlRepE-2377	DNA	CMC-EnSpm	22.2067	6.17888	17.5079	28.0283
hAT-27_LCh	DNA	DNA	216.498	43.0667	143.894	27.9783
AlRepE-21	Unknown	Unknown	133.003	13.4326	150.497	27.8436
Mariner-6_DR	DNA	TcMar-Tc1	229.681	48.256	74.9994	27.8415
IS4EU-2_DR	DNA	PIF-ISL2EU	86.6629	26.9805	225.15	27.8266
Gypsy-10_DWil-I	LTR	Gypsy	0.664899	1.39348	44.3386	27.6607
AlRepD-2011	Unknown	Unknown	138.956	114.34	51.5339	27.658
Zator-N1C_CQ	DNA	Zator	2.48178	2.33139	44.2768	27.6217
Gypsy-17_XT-I	LTR	Gypsy	283.15	215.331	190.144	27.546
REP-2_CPB	Unknown	Unknown	37.6839	4.02132	27.1898	27.4918
Kolobok-1_DR	DNA	Kolobok-T2	27.9376	28.0269	37.954	27.4893
Gypsy-82_CQ-I	LTR	Gypsy	666.301	136.104	61.7543	27.339
Gypsy-16_LH-I	LTR	LTR	0	0	0	27.2762
AlRepE-436	Unknown	Unknown	191.843	47.6292	66.261	27.1695
AlRepD-3226	LINE	L2	153.685	77.2136	30.0243	27.1394
Mariner-9_HM	DNA	TcMar-Fot1	848.995	9.86913	22.7122	27.1317
AlRepE-50	Unknown	Unknown	632.693	348.758	70.1149	27.1278
Kiri-2_AAe	LINE	L2	9.77076	17.4254	15.893	27.0989
AlRepD-3099	Unknown	Unknown	40.1035	28.8735	118.103	27.0829
Nimb-4_DR	LINE	I	596.683	41.7635	205.426	27.065
AlRepC-345	LTR	Gypsy	104.949	109.282	496.941	26.9402
Gypsy118-LTR_DR	LTR	Gypsy	170.635	23.8012	35.533	26.7659
AlRepE-368	Unknown	Unknown	250.6	112.469	24.3409	26.6842
MIRAGE1	DNA	CMC-Mirage	42.1265	49.9541	82.7858	26.672
BEL-13_LH-I	LTR	LTR	16.6403	0.644243	96.1249	26.6654
Gypsy-2_LCh-I	LTR	LTR	31.1935	21.8269	49.349	26.6601
PRIMA4-int	LTR	ERV1	155.848	22.2198	82.7037	26.619
hAT-21N2_LMi	DNA	hAT-Tip100	66.4601	10.0694	9.09183	26.6183
REX1-9_XT	LINE	Rex-Babar	10.8788	5.89614	14.0586	26.4915
AlRepD-1353	DNA	PiggyBac	72.9708	34.5342	73.9979	26.4867
AlRepD-1421	Unknown	Unknown	55.0246	477.109	87.1989	26.4849
Kolobok-N7_CGi	DNA	Kolobok	7.8612	30.0778	3.15691	26.4196
Helitron-1_CGi	RC	Helitron	19.041	11.6287	44.0443	26.4143
BEL11-I_DR	LTR	Pao	757.554	14.3577	353.304	26.3413
Tx1-4_SK	LINE	L1-Tx1	184.542	33.1847	172.831	26.1909
LTR1B2_OG	LTR	ERV1	289.109	28.9067	189.204	26.1755
Penelope-1_SIn	LINE	LINE	12.2204	9.07703	24.4321	26.1561
L1-89_DR	LINE	L1	83.9912	3.72013	50.5243	26.0109
L1-61_ACar	LINE	L1	204.853	52.5567	13.9499	25.9714
Mariner-23_AEc	DNA	DNA	36.6737	39.6167	126.198	25.9156
hAT-N6_ACar	DNA	hAT-Charlie	376.308	49.6192	267.057	25.9121
Helitron-2N_DW	RC	Helitron	1.56155	0	35.8676	25.8604
AlRepC-849	LINE	Rex-Babar	691.677	295.676	202.201	25.8324
Zisupton-4_DR	DNA	Zisupton	11.9811	9.57075	51.8528	25.7793
MuDr-1_BF	DNA	MULE-NOF	30.241	19.9287	88.5685	25.7738
CR1-2_LCh	LINE	LINE	40.0703	44.2278	9.86155	25.7101
DIRS-2_SP	LTR	DIRS	8.46867	0	0	25.6689
Academ-1_SK	DNA	Academ	28.9943	10.3136	16.4381	25.635
Jockey-3_DPer	LINE	Jockey	48.5862	85.6762	64.9663	25.6295
Gypsy-22_GA-LTR	LTR	Gypsy	105.544	186.486	413.568	25.6143
CR1-3_DBp	LINE	CR1	19.3286	5.16095	3.98304	25.5717
AlRepE-7565	Unknown	Unknown	16.8802	9.64024	80.3744	25.4431
ISL2EU-7_CGi	DNA	PIF-ISL2EU	34.0906	20.0943	18.6031	25.4401
AlRepE-1024	Retroposon	Retroposon	104.521	91.4005	60.2161	25.2741
PAO_LTR	LTR	Pao	25.8134	0.294353	22.5165	25.1563
DNAX-23_DR	DNA	DNA	316.647	32.6041	88.8294	25.1509
L1-26_DR	LINE	L1	435.194	82.0329	67.1221	24.994
CR1-5_DT	LINE	CR1	30.1755	1.44034	15.5543	24.9661
piggyBac-N12_DR	DNA	PiggyBac	153.807	50.7632	78.1734	24.9574
Mf3_MF	Unknown	Unknown	23.3852	144.395	0	24.9548
AlRepD-2090	Unknown	Unknown	56.6396	45.2925	32.9407	24.9411
RTEX-2_DR	LINE	RTE-X	33.7992	7.2025	5.55212	24.9196
CR1-2_FR	LINE	Rex-Babar	488.85	222.18	251.375	24.8585
AlRepD-183	DNA	DNA	20.8313	23.2173	12.6133	24.7493
L1-1_Pca	LINE	L1	17.938	11.2595	44.5126	24.6899
POLINTN1_SM	DNA	DNA	35.3358	2.73478	72.0375	24.6843
SAT-1_Crp	Satellite	Satellite	12.4455	4.05024	20.4955	24.6599
Jockey-1_DT	LINE	Jockey	1.49799	0	0	24.643
Polinton-1_PBa	DNA	DNA	16.5076	10.125	198.006	24.6389
Gypsy-180_AA-I	LTR	Gypsy	21.941	23.5969	7.60104	24.5117
L1-1_ME	LINE	L1	12.1252	16.3766	2.8356	24.4868
Gypsy-16_AMi-LTR	LTR	Gypsy	0.599082	0	41.3717	24.4188
L2-13B_DRe	LINE	L2	28.2333	4.39143	0	24.3967
Dong2_FR	LINE	Dong-R4	45.766	22.4815	16.7964	24.3673
LTR-522_AMi	LTR	Gypsy	0.124369	3.05036	7.60838	24.3523
AlRepE-299	Unknown	Unknown	81.0196	352.506	55.2323	24.1442
CER2-LTR_CE	LTR	Gypsy	1.78598	3.79838	0	24.1317
EnSpm-N11_DR	DNA	CMC-EnSpm	328.986	76.3323	62.3338	24.0633
Tx1-7_DR	LINE	L1-Tx1	140.259	21.1617	38.5562	23.9603
AlRepD-5346	Unknown	Unknown	90.6806	12.6398	25.9697	23.8991
TC2_FR5	DNA	TcMar-Tc2	135.995	52.5568	53.8881	23.8426
ERV1-7_AMi-I	LTR	ERV1	115.666	20.2071	544.054	23.7141
Gypsy-16_DTa-I	LTR	Gypsy	11.3026	38.9312	54.8065	23.7141
Gypsy-21-I_DR	LTR	Gypsy	87.5817	18.3847	155.625	23.6427
ERV4_DR-I	LTR	ERV1	172.291	38.9848	1439.04	23.6394
AlRepD-2923	Unknown	Unknown	237.122	47.7262	166.952	23.6234
AlRepC-234	DNA	hAT	665.09	118.22	100.117	23.6107
Mariner-5_GA	DNA	TcMar-ISRm11	119.59	91.7301	24.6369	23.6021
LTR11B2a2_EE	LTR	ERVK	0	0	49.3741	23.5877
AlRepD-4614	LINE	L2	180.971	45.6637	108.128	23.5729
BEL5-I_DR	LTR	Pao	50.9078	20.4547	34.6634	23.2795
Gypsy-11_DTa-LTR	LTR	Gypsy	11.6173	0.133379	10.8657	23.1412
AlRepE-79	LINE	L2	204.008	81.3578	98.8296	23.0928
Polinton-3_SP	DNA	Maverick	327.616	55.3296	96.1848	22.9976
AlRepB-127	DNA	DNA	533.417	246.536	145.56	22.9904
AlRepD-992	LINE	L1	222.307	49.3065	144.424	22.7267
Ginger1-7_HM	DNA	Ginger	18.6958	6.28403	15.3094	22.7084
Copia-2_Deu-I	LTR	Copia	0.305599	0	27.2881	22.6751
HE1_MM	SINE	tRNA-V-CR1	98.025	32.7828	28.0541	22.6403
Copia16-NVi_I-int	LTR	Copia	21.8975	4.70889	22.8215	22.6029
Gypsy-207_DR-I	LTR	Gypsy	11.7413	5.94469	34.1265	22.5583
AlRepE-1560	DNA	hAT	307.323	99.4239	405.796	22.5226
RLTR19-int	LTR	ERVK	114.572	53.4144	62.9347	22.4857
AlRepD-280	Unknown	Unknown	103.776	32.2976	75.7269	22.4379
AlRepD-4606	Unknown	Unknown	233.973	71.7864	69.8002	22.385
Gypsy-21_Gav-I	LTR	Gypsy	7.84402	20.1363	16.2483	22.3848
AlRepE-2537	DNA	PiggyBac	79.9713	192.657	50.8206	22.3788
ERV1-1_Gav-I	LTR	ERV1	119.883	5.45881	31.4914	22.343
EnSpm-18_DR	DNA	CMC-EnSpm	19.0836	3.09334	22.6809	22.2725
AlRepE-2621	DNA	IS3EU	486.51	27.0388	49.3523	22.2711
EnSpm-1_HM	DNA	CMC-EnSpm	335.549	15.1317	11.2375	22.2396
L1-33_DR	LINE	L1	61.9486	19.7393	66.2946	22.2048
AlRepE-3031	DNA	TcMar-Tc1	130.558	52.3103	60.2145	22.1776
Poseidon-10_HM	LINE	Penelope	0	0.346649	0	22.1705
Polinton-2_DBi	DNA	Maverick	39.8845	4.28159	3.09422	22.1671
AgaP15	DNA	P	17.9782	0.846568	8.03517	22.029
Mariner-7_DR	DNA	TcMar-Tc1	220.664	19.5372	12.4217	21.7289
AlRepD-245	LINE	Rex-Babar	277.707	150.66	99.0974	21.6449
AlRepD-94	Unknown	Unknown	44.8861	39.4661	15.3629	21.5675
AlRepB-473	DNA	hAT	1600.55	111.359	84.6789	21.4367
DNA-TA-4_NV	DNA	TcMar-Tc2	26.4335	3.2521	9.38966	21.3451
DNA2c_Lch	DNA	DNA	227.582	130.778	111.928	21.3205
AlRepD-6553	Unknown	Unknown	25.8313	13.3821	59.8447	21.312
Tc1-2Sco	DNA	TcMar-Tc1	24.4415	10.4327	17.0326	21.2442
AlRepD-453	LINE	L1	69.5412	21.6407	41.7496	21.208
Mariner-79_HSal	DNA	DNA	15.5661	15.3179	5.94061	21.199
Copia-1_DTa-I	LTR	Copia	12.3461	0	33.3834	21.1493
SAT-23_DR	Satellite	Satellite	34.3007	15.5817	43.4829	21.1463
Helitron-1_DR	RC	Helitron	247.245	26.2814	12.676	20.9171
AlRepD-816	DNA	PiggyBac	274.456	72.9408	78.1538	20.6922
AlRepE-2149	Unknown	Unknown	88.2718	21.6741	27.6838	20.6419
DIRS-5_DR	LTR	Ngaro	97.9852	43.5745	147.453	20.5467
AlRepD-3586	Unknown	Unknown	266.264	30.6799	149.651	20.4316
AlRepC-753	LINE	Rex-Babar	258.623	63.1078	111.151	20.4209
BEL-199_AA-I	LTR	Pao	4.92576	3.08212	3.60706	20.389
BEL-52_DRe-I	LTR	Pao	27.1248	0	0	20.3726
hAT-11_LCh	DNA	DNA	44.6408	11.2064	34.9039	20.3081
DNA-1_CQ	DNA	DNA	27.6729	16.4602	54.594	20.1565
tRNA-3_DRe	Satellite	Satellite	37.2306	5.27819	9.95707	20.0908
ERV1-7_DR-I	LTR	ERV1	18.4999	23.5764	23.188	20.0665
L1-95_DR	LINE	L1	91.0326	16.1935	34.0346	20.0015
Gypsy-36_DPu-I	LTR	Gypsy	40.53	24.0815	84.2549	19.9628
hAT-N26_DR	DNA	hAT	16.2852	1.11177	8.31836	19.9226
DIRS1_FR	LTR	DIRS	284.508	94.648	69.3469	19.9199
AlRepC-1805	rRNA	rRNA	43.991	40.2587	9.92573	19.9189
Gypsy-9_DAn-I	LTR	Gypsy	7.84208	4.19122	28.6189	19.9002
ERV2-1_ET-I	LTR	ERVK	12.153	13.3186	24.6311	19.8815
L2-43_DR	LINE	L2	79.2805	68.8715	82.8178	19.849
CR1-69_HM	LINE	CR1	66.9256	19.5805	22.5524	19.8062
ERV6_MD_I-int	LTR	ERV1	17.4098	2.22651	33.2021	19.8023
Harbinger-1_LMi	DNA	PIF-Harbinger	15.6949	0	5.26799	19.7691
Rex1-52_DR	LINE	Rex-Babar	689.734	96.3864	497.173	19.7517
hAT-N16_Crp	DNA	hAT-Charlie	20.1586	6.00671	29.5721	19.6848
Harbinger-2N1_DR	DNA	PIF-Harbinger	507.776	327.964	98.7675	19.6329
AlRepE-1027	DNA	DNA	176.27	254.813	171.736	19.5062
DNA2-1_DR	DNA	CMC-EnSpm	83.9024	11.0994	47.5622	19.4686
Polinton-1_SPU	DNA	Maverick	48.156	30.5041	39.7567	19.4642
DNA-3-5_DR	DNA	DNA	226.868	2.6575	0.683657	19.4256
AlRepD-2262	Unknown	Unknown	263.827	110.123	139.715	19.3931
CR1-37_DR	LINE	L2	12.6865	1.37539	0.873136	19.3859
BEL-63_DRe-I	LTR	Pao	8.84593	18.7613	0	19.179
BEL25-I_DR	LTR	Pao	31.1955	5.82279	16.786	19.1622
DNA-8-25_DR	DNA	hAT-Ac	394.668	100.168	82.432	19.1576
Chapaev-1_NV	DNA	CMC-Chapaev	0.700641	1.6656	33.8331	19.1122
Polinton-1_XT	DNA	Maverick	69.4123	1.95114	29.2631	19.0981
Kiri-2_DTa	LINE	L2	198.031	111.542	55.4042	18.9808
Gypsy-29-I_DR	LTR	Gypsy	6.94797	18.3186	11.8232	18.9761
AlRepC-769	Unknown	Unknown	153.582	73.3987	65.5641	18.9479
Gypsy-29_DPu-I	LTR	Gypsy	6.99774	17.4466	9.16574	18.9382
GYPSY2-I_CB	LTR	Gypsy	4.71546	5.69082	457.479	18.9174
AlRepE-6034	LINE	L2	321.35	63.4044	221.592	18.9148
AlRepD-1474	Unknown	Unknown	46.5213	19.5703	24.7352	18.849
Tc1-1_PM	DNA	TcMar-Tc1	48.879	11.9689	30.0282	18.7472
AlRepD-1103	Unknown	Unknown	57.8305	9.41702	52.332	18.6797
ERV54-EC_I-int	LTR	ERV1	1.12936	0.840199	988.393	18.5948
AlRepE-2742	Unknown	Unknown	61.6603	9.18433	17.8268	18.4129
AlRepD-180	Unknown	Unknown	12.2123	11.5946	21.767	18.312
Tc1-2Eso	DNA	TcMar-Tc1	34.7912	19.0984	4.33191	18.2466
L2-68_HMa	LINE	L2	54.5605	50.9545	63.0462	18.2408
Mariner-N2_DR	DNA	TcMar	130.123	48.8824	20.3772	18.2395
BEL-592_AA-I	LTR	Pao	19.3231	0.57133	8.32328	18.1852
RTEX-19_CGi	LINE	RTE-X	1.65222	0.568837	24.9127	18.1691
L1-13_DR	LINE	L1	39.5876	6.43905	11.0134	18.1513
AlRepE-588	Unknown	Unknown	294.894	249.595	333.882	18.1486
L2-1_PM	LINE	L2	15.6289	1.51185	9.15019	18.1483
AlRepE-2094	Unknown	Unknown	50.2429	35.3492	445.14	18.0371
AlRepE-3576	LTR	LTR	371.014	347.39	398.288	18.034
TC1_PP	DNA	TcMar-Tc1	47.6487	6.00379	22.3045	18.0118
Gypsy-110_DR-I	LTR	Gypsy	402.787	287.007	98.5323	17.95
DNA-5-2B_DR	DNA	hAT-Tip100	358.402	1.10145	132.667	17.9431
MMSAT4	Satellite	Satellite	2.94715	0.841486	10.5608	17.9329
AlRepD-1783	Unknown	Unknown	116.28	100.11	66.8344	17.9071
Tx1-8_SK	LINE	L1-Tx1	7.83661	2.69938	8.2123	17.8813
Tc1-2_Xt	DNA	TcMar-Tc1	96.506	76.914	32.6918	17.8344
Gypsy63-I_DR	LTR	Gypsy	36.3015	20.2917	43.2242	17.8076
Chapaev-7_HM	DNA	CMC-Chapaev	33.7971	2.77236	10.5126	17.7599
DNA8-2_DR	DNA	hAT-Tip100	86.5663	30.9884	10.4827	17.6601
hAT6-2N1_SP	DNA	hAT-Blackjack	24.5179	4.48331	3.79842	17.6505
AlRepD-146	Unknown	Unknown	211.012	129.287	120.545	17.5674
AlRepD-435	Unknown	Unknown	51.8299	5.45122	10.0245	17.5664
Gypsy141-I_DR	LTR	Gypsy	48.3249	10.6473	17.6015	17.5019
RTE-15_BF	LINE	RTE-BovB	21.9441	11.5201	66.2356	17.5008
hAT-4_DK	DNA	hAT-hobo	4.73126	0.145279	5.36259	17.4823
TDR8B	DNA	hAT-Ac	1146.74	10.0689	15.3376	17.4624
CR1-12_CGi	LINE	CR1-Zenon	53.5869	40.5972	24.1174	17.4304
P-19_HM	DNA	P	13.5411	1.74658	36.0152	17.4191
Gypsy-226_DR-I	LTR	Gypsy	42.3735	0	5.01789	17.3741
AlRepE-5054	Unknown	Unknown	70.3552	27.758	40.8817	17.3713
HERO-2_BF	LINE	R2-Hero	8.72645	0	2.38264	17.3521
AlRepD-2392	Unknown	Unknown	75.5857	17.4847	140.113	17.3384
CR1-3_DWi	LINE	CR1	36.106	6.03044	3.14902	17.2877
Gypsy92-I_DR	LTR	Gypsy	122.511	3.85734	0	17.206
AlRepD-1390	Unknown	Unknown	151.084	67.7293	123.529	17.1748
AlRepD-484	Unknown	Unknown	128.514	43.0263	606.547	17.1134
AlRepD-1383	LTR	Gypsy	172.679	90.1815	56.6362	17.1131
AlRepD-945	DNA	hAT-Charlie	55.7856	17.5105	69.9876	17.0999
AlRepB-11	DNA	DNA	53.8222	48.2986	36.8899	17.0539
BEL-2_DSe-I	LTR	Pao	381.402	27.5602	9.161	17.0525
AlRepE-307	Unknown	Unknown	78.6681	46.6082	55.0438	16.9778
BEL-10_DEl-I	LTR	Pao	3.95016	9.91531	16.1086	16.9755
L1-44_DR	LINE	L1	127.944	87.9933	45.7568	16.93
Gypsy-23_Ano-I	LTR	ERV1	25.5093	0.916581	33.018	16.8553
I-7B_AAe	LINE	I	106.582	17.4911	3.76045	16.8392
Crack-8_AAe	LINE	L2	1.04839	0	3.70339	16.8122
CR1-7_CQ	LINE	CR1	25.4472	4.98852	1.5018	16.7583
ISL2EU-18_CGi	DNA	PIF-ISL2EU	141.279	12.2349	17.4598	16.7194
piggyBac-N6_DR	DNA	PiggyBac	27.209	16.5346	11.6848	16.6562
piggyBac-1_LCh	DNA	DNA	2.33527	0.942077	0.727063	16.6248
DIRS-47_XT	LTR	DIRS	7.70337	0	151.651	16.6154
BEL-4_CSa-I	LTR	Pao	148.908	5.78751	5.00761	16.5703
Gypsy-9_CSa-I	LTR	Gypsy	85.9868	65.5839	1631.6	16.5191
AlRepE-1325	Unknown	Unknown	373.475	2.27633	30.7667	16.4803
Gypsy-55-I_NV	LTR	Gypsy	2268.53	85.2138	151.499	16.4677
RNERV14-int	LTR	ERVK	5.80509	2.32992	8.08984	16.4374
ERV1-1_TSy-I	LTR	ERV1	3.03967	132.075	0	16.429
AlRepD-2028	DNA	P	163.611	46.9413	219.19	16.4095
AlRepC-911	LINE	Rex-Babar	294.57	163.54	93.1637	16.3856
AlRepC-18	DNA	hAT	16.2289	5.32606	9.25111	16.3746
AlRepD-1830	LTR	Gypsy	24.7658	15.4811	29.3428	16.3594
AlRepC-169	Unknown	Unknown	611.697	144.885	255.006	16.3084
AlRepE-2339	Unknown	Unknown	21.3672	7.47422	17.2283	16.2212
Gypsy14-NVi_I-int	LTR	Gypsy	29.1899	19.1136	37.5649	16.2002
tRNA-Ile-ATA	tRNA	tRNA	0.824169	0.494854	0	16.1967
REP-6_CPB	Unknown	Unknown	16.1214	20.5851	12.9371	16.1621
REX1-8_DR	LINE	Rex-Babar	11.0848	7.47062	9.39904	16.1565
Gypsy-8_AMi-I	LTR	Gypsy	6.6803	19.4532	46.4776	16.112
AlRepE-1501	Unknown	Unknown	196.926	34.0235	64.4373	15.9539
AlRepD-583	Unknown	Unknown	367.24	1281.85	267.887	15.9372
DIRS-34A_XT	LTR	DIRS	31.0561	9.1309	0	15.8748
I-9_AAe	LINE	I	24.2057	37.1362	8.42319	15.8528
AlRepD-4997	Unknown	Unknown	113.166	22.1711	30.7541	15.7758
LINEX-2_DR	Retroposon	Retroposon	101.609	42.9433	48.8261	15.7514
BEL-89_CQ-I	LTR	Pao	9.04314	6.57547	9.65677	15.7033
hAT-9_LMi	DNA	hAT-Charlie	5.65214	0.858337	14.9041	15.653
AlRepD-1578	Unknown	Unknown	96.4377	44.9092	45.8984	15.5468
AlRepE-3325	Unknown	Unknown	85.8415	22.8939	76.2745	15.5257
AlRepE-6016	Unknown	Unknown	252.782	36.942	344.779	15.5242
Penelope-1_Gav	LINE	Penelope	3.01539	2.52827	9.92873	15.4696
AlRepD-2569	DNA	TcMar-Tc2	399.778	144.798	49.69	15.4503
L1-82_ACar	LINE	L1	133.67	6.57285	70.057	15.4086
Kolobok-4_DR	DNA	Kolobok-T2	83.3996	2.29065	12.7127	15.4082
ISL2EU-1_SK	DNA	PIF-ISL2EU	349.436	58.1542	207.839	15.387
Gypsy-22_DY-I	LTR	Gypsy	47.1958	1.68903	12.8881	15.3424
DNA-X-16_DR	DNA	DNA	60.88	7.83106	10.8346	15.3033
Gypsy108-I_Dr	LTR	Gypsy	1.2133	0	0	15.3025
ERV1-1-I_XT	LTR	ERV1	6.95068	0.449275	3.06992	15.2736
hAT-N29_DR	DNA	hAT	36.7101	10.0152	35.9028	15.2619
Gypsy-181_DR-I	LTR	Gypsy	0.544884	0	6.51031	15.2058
TguERV1_LTR1c	LTR	ERV1	27.7985	8.00254	13.7519	15.1894
AlRepD-2296	LTR	Ngaro	104.599	24.3403	56.805	15.1786
Chapaev-N5_AAe	DNA	CMC-Chapaev	60.7512	27.7546	64.5153	15.1606
AlRepE-7292	Unknown	Unknown	77.6029	26.3312	19.6157	15.1358
Gypsy-14_CPB-I	LTR	Gypsy	55.8933	8.97734	54.508	15.0437
Polinton-1_SM	DNA	Maverick	26.7857	0.476922	11.5879	15.0215
Academ-4_SP	DNA	Academ	39.1776	2.31187	10.6351	14.993
CR1-4_Croc	LINE	CR1	1.29507	5.47606	2.69441	14.9866
piggyBac-1_BF	DNA	PiggyBac	110.239	216.724	23.8711	14.9644
Gypsy-22-LTR_SP	LTR	Gypsy	0.785273	0	0	14.9371
Copia-9_Ano-I	LTR	Copia	3.12606	37.4645	3.22033	14.9133
Gypsy-6_LH-I	LTR	LTR	4.28881	27.5602	0	14.8991
hAT-10_DR	DNA	hAT-Tip100	229.083	50.6705	62.8175	14.8665
L1-45_DR	LINE	L1	16.9143	11.5752	20.13	14.7927
REP-4_CQ	Unknown	Unknown	22.3825	4.02629	69.7673	14.7439
CR1-49_DR	LINE	L2	200.861	23.1756	5.49571	14.738
Polinton3_SM	DNA	Maverick	0.635362	0	2.68177	14.6991
L1-19_DR	LINE	L1	24.4212	6.98902	70.2639	14.6642
piggyBac-2_XT	DNA	PiggyBac	351.026	62.6067	13.9588	14.6637
Gypsy-6_BM-I	LTR	Gypsy	31.0559	22.7096	38.0374	14.6164
Harbinger-313_AMi	DNA	PIF-Harbinger	22.7921	0	0	14.6164
REX1-9_DR	LINE	Rex-Babar	50.6865	349.739	66.1346	14.5708
HOMER	DNA	hAT-hobo	6.46579	5.78756	23.2525	14.5319
Gypsy-21_PBa-LTR	LTR	LTR	69.0783	28.5985	19.4756	14.382
AlRepE-1471	Unknown	Unknown	63.4687	27.1847	35.5652	14.374
DIRS-43_XT	LTR	DIRS	0.533478	0	0	14.3615
L1-12_DR	LINE	L1	493.776	78.6541	244.381	14.2278
Zisupton-3_DR	DNA	Zisupton	126.498	17.0417	106.044	14.2086
DIRS-2_SK	LTR	DIRS	2.19873	6.46984	4.96412	14.203
Gypsy-52_GA-I	LTR	Gypsy	15.7579	4.52487	38.8235	14.1878
AlRepD-1339	DNA	TcMar-Tc2	290.154	88.6567	59.3894	14.1838
Nimb-3_DR	LINE	I	9.23864	3.88521	18.4026	14.155
Gypsy-10_AA-I	LTR	Gypsy	0.28163	0	0	14.1308
Homo2	DNA	hAT-Ac	4.22938	0	0.883765	14.1159
AlRepE-1208	Unknown	Unknown	97.4529	52.8588	118.105	14.0874
Tc1-2Ory	DNA	TcMar-Tc1	45.6942	11.1646	14.956	14.0086
hAT-N3_FR	DNA	hAT-Tip100	6.14235	3.31856	5.70948	13.9856
SWIMMER1	LINE	L1	55.8225	22.0154	16.5631	13.9514
hAT-6_SM	DNA	hAT-Charlie	104.555	23.0295	47.3255	13.9269
L1-31_DR	LINE	L1	137.404	132.762	90.0243	13.8899
Gypsy-190_DR-I	LTR	Gypsy	32.9008	11.9599	25.676	13.8656
AlRepD-30	Unknown	Unknown	158.403	17.9191	44.3266	13.8441
Gypsy-78-I_NV	LTR	Gypsy	9.15506	1.19807	124.878	13.8265
hAT-N138_DR	DNA	hAT-Tol2	22.0977	5.90982	34.1719	13.7534
BEL-44_DRe-I	LTR	Pao	3.89567	39.2967	12.5778	13.745
AlRepD-1181	LINE	L2	47.908	16.2407	23.1425	13.6804
SAT-20_DR	Satellite	Satellite	61.4771	22.6115	4.50541	13.6674
Dada-U6_OL	DNA	Dada	45.5458	17.2352	66.2184	13.639
Mariner-6_CPB	DNA	TcMar-Tigger	0	0	5.72562	13.62
CR1-3c_LCh	LINE	LINE	31.7917	53.7967	14.4995	13.585
HAT1-N1B_DR	DNA	hAT-Ac	34.5781	3.01285	17.4585	13.5601
BEL-64_CQ-I	LTR	Pao	0.312242	87.2217	48.2273	13.5484
DNA-2-31_DR	DNA	TcMar-ISRm11	307.095	15.5563	84.6401	13.5453
Penelope-2_DR	LINE	Penelope	73.9459	22.2491	154.125	13.4979
DIRS-1-LTR_DR	LTR	Ngaro	36.4747	28.1509	32.2353	13.4898
AlRepD-892	DNA	hAT-Ac	78.992	35.1649	191.081	13.479
Crack-7_BF	LINE	L2	33.4917	5.87681	0.837283	13.4692
Rex1-1B_FR	LINE	Rex-Babar	310.303	62.0958	106.493	13.446
LTR1A2_ML	LTR	ERV1	2.67599	0.304865	3.84261	13.3603
Howilli1	DNA	hAT-Ac	0	0	40.4398	13.305
AlRepC-550	Unknown	Unknown	256.033	23.2009	32.7407	13.2668
AlRepD-287	Unknown	Unknown	294.641	53.8067	89.2246	13.2516
Mariner-11_DR	DNA	TcMar-Tc1	102.551	38.2928	33.4909	13.226
BEL-59_DRe-I	LTR	Pao	43.7539	4.81916	26.7049	13.1887
Crack-1_IS	LINE	L2	0.747017	0.817286	0.882279	13.1338
P_DB	DNA	P	37.5967	15.3617	49.3975	13.0217
BEL32-LTR_DR	LTR	Pao	65.3164	1.00005	71.0311	12.9867
L1-3_LCh	LINE	LINE	5.20719	3.52284	12.2819	12.969
EnSpm-N3B_DR	DNA	CMC-EnSpm	1.12056	1.03503	797.061	12.9149
ERV13_MD_I-int	LTR	ERV1	89.3806	8.53346	171.732	12.8862
ERVB2_1A-I_MM	LTR	ERVK	26.1844	5.83151	19.7268	12.8709
TC1_FR5	DNA	TcMar-Tc1	186.207	155.556	71.6064	12.8669
L1Hylob	LINE	L1	0	0	71.6532	12.8603
hATm-2_SM	DNA	hAT-hATm	2.56221	1.37072	7.9644	12.7321
DIRS-1F-LTR_DR	LTR	Ngaro	71.0484	17.8544	55.3682	12.7263
Gypsy61-I_DR	LTR	Gypsy	48.4348	13.3441	46.0414	12.7117
I-3_AC	LINE	I	26.4559	12.9202	14.6542	12.707
AlRepE-2642	LINE	RTE-BovB	79.9785	6.63617	40.9238	12.6609
RMER16_Mm	LTR	ERVK	15.8287	0	3.86696	12.655
AlRepC-1720	Unknown	Unknown	420.671	68.3865	138.993	12.6319
Neptune3_Ren	LINE	Penelope	2.73046	0.394739	5.20166	12.5885
Dada-U1A_DR	DNA	Dada	57.709	0	14.4223	12.5512
AlRepE-3028	DNA	CMC-EnSpm	154.502	93.2188	149.184	12.5397
Gypsy-42_GA-I	LTR	Gypsy	297.567	65.9475	73.6218	12.4926
BEL36-I_DR	LTR	Pao	180.984	20.5538	136.005	12.4905
AlRepD-1833	Unknown	Unknown	19.7369	12.5357	14.8533	12.4516
Mariner-4_LHu	DNA	DNA	15.1713	9.63496	10.5127	12.4506
MIR_Aves1	SINE	MIR	91.8571	168.976	84.2038	12.4444
CR1-1_BM	LINE	CR1	1.7019	2.04869	14.6576	12.418
Gypsy-8_DFi-I	LTR	LTR	1.52184	0.878234	6.71562	12.3754
Polinton-2_SP	DNA	Maverick	2.81917	0	2.91329	12.3269
DNA-1-6_DR	DNA	DNA	1.91471	0	2.79829	12.3041
Dada-1_GM	DNA	Dada	84.0458	0	0	12.284
ERV3-1_SSc-I	LTR	ERV1	2.12995	0	5.98241	12.2807
AlRepD-843	Unknown	Unknown	141.031	37.2153	43.2016	12.261
DNA-2-24B_DR	DNA	DNA	43.4561	13.2584	72.2328	12.2323
AlRepE-2095	Unknown	Unknown	85.0197	30.1989	69.4202	12.216
Gypsy-147_AA-I	LTR	Gypsy	12.1444	0	0	12.2026
Gypsy-10_CGi-I	LTR	Gypsy	582.687	1.89694	0	12.1803
L2-45_DR	LINE	L2	231.618	79.0584	101.005	12.1733
Sake_BM	LINE	L2	5.21471	0.826426	26.7667	12.1714
HEROFr	LINE	R2-Hero	187.835	335.516	111.751	12.1708
L1-33_ACar	LINE	L1	20.4996	50.4608	2.54472	12.1599
Mariner-101_HSal	DNA	DNA	174.576	10.7889	11.6619	12.1436
SMAR12	DNA	TcMar-Tc2	192.856	22.1918	53.406	12.142
BEL-48_CQ-I	LTR	Pao	15.6678	0	365.401	12.1371
DNA-8-32_DR	DNA	hAT	123.55	9.92453	33.4514	12.0817
Gypsy-10_Crp-I	LTR	Gypsy	0.330523	0	0	12.0633
Tigger3	DNA	TcMar-Tigger	28.1524	70.506	65.7982	12.0124
DNA-TA-4_DR	DNA	TcMar	15.3402	1.59742	16.2254	11.9771
AlRepB-450	Unknown	Unknown	96.7632	12.0831	45.3607	11.9274
Tx1-11_DR	LINE	L1-Tx1	72.1616	10.6451	66.2766	11.8747
U2	snRNA	snRNA	375.699	501.036	904.73	11.8404
AlRepE-3962	DNA	hAT-Ac	83.3217	30.6811	155.428	11.8115
LTR11_OC	LTR	ERVK	0.820959	5.51525	0	11.8094
REX1-6_XT	LINE	Rex-Babar	164.281	56.3853	102.851	11.8085
Chompy-4_Crp	DNA	PIF-Harbinger	18.2897	80.7766	131.539	11.7952
Mariner-10_DF	DNA	TcMar-Tc1	1.88156	0	0	11.7453
AlRepC-2704	DNA	hAT-Tip100	203.561	896.941	52.2209	11.741
hAT-208_Ami	DNA	hAT-Blackjack	377.644	241.7	157.432	11.6995
Gypsy127-I_DR	LTR	Gypsy	40.6179	9.82074	28.5884	11.6918
SINE2AFC	SINE	SINE	119.818	28.1984	205.964	11.6902
BEL10-I_DR	LTR	Pao	2.61653	0	6.31394	11.6723
Tx1-23_DR	LINE	L1-Tx1	154.771	33.2589	85.9822	11.6419
hAT-2_DSe	DNA	hAT-Ac	7.45823	3.00071	7.47997	11.6328
AlRepC-300	Unknown	Unknown	337.392	140.493	104.217	11.5898
CR1-46_HM	LINE	L2-Hydra	23.2901	28.822	19.4539	11.566
BEL-48_DRe-I	LTR	Pao	29.5445	8.23093	35.0774	11.5632
CR1-14_BF	LINE	CR1	9.68621	3.31037	1.89884	11.5154
EnSpm-N17_DR	DNA	TcMar	180.501	72.5705	218.881	11.4994
BEL-93_CQ-LTR	LTR	Pao	0.638362	3.3608	2.363	11.485
ERV2-3_FC-I	LTR	ERVK	5.73781	6.55152	6.56638	11.4683
Gypsy13-I_DR	LTR	Gypsy	139.275	19.3898	132.182	11.4293
ISL2EU-1_DR	DNA	PIF-ISL2EU	6.22154	2.8177	10.074	11.3899
Tc1-1Ory	DNA	TcMar-Tc1	59.9437	11.1814	18.2018	11.3881
DERV2a_I-int	LTR	ERVK	0	0.840199	0	11.3832
Helitron-N35_CGi	RC	Helitron	510.812	2.42248	17.2838	11.3689
AlRepD-641	DNA	TcMar-ISRm11	45.6104	7.87278	32.0488	11.3349
L1-1_XT	LINE	L1	3.55843	0	4.62697	11.3199
Helitron-1_HM	RC	Helitron	3872.27	27.2573	76.0878	11.2873
DNA-8-35_DR	DNA	hAT-Tip100	0	1.00426	6.255	11.2847
AlRepD-837	DNA	TcMar-Tc1	69.3156	15.1979	16.8312	11.2607
CER2-1-LTR_CE	LTR	Pao	41.3191	21.7716	22.6427	11.2215
RTE-5_LCh	LINE	LINE	78.6187	5.85192	6.51466	11.1948
hAT-N2A_XT	DNA	hAT-Ac	73.2672	108.405	101.984	11.1417
hAT-11_LMi	DNA	hAT-Tip100	4.6302	64.7043	0.682204	11.131
Tx1-15_Lch	LINE	LINE	5.7064	0.900214	0	11.1131
DIRS-12_DR	LTR	DIRS	73.0775	48.2675	29.5526	11.0866
CER10-I_CE	LTR	Pao	7.68334	1.82536	32.7828	11.0719
AlRepD-2611	DNA	TcMar-Tc1	43.0032	14.7335	37.4946	11.0239
AlRepD-3668	DNA	DNA	61.2425	49.4354	1109.74	11.0105
L1-17b_Lch	LINE	LINE	3.81694	1.21892	5.43551	10.997
Gypsy57-I_AG	LTR	Gypsy	59.4836	16.2112	43.5706	10.9782
Polinton-8_NVi	DNA	Maverick	168.128	14.3639	10.4145	10.9673
Gypsy-38_CGi-I	LTR	Gypsy	0.463974	0.10604	2.33001	10.9585
L2-5_LCh	LINE	LINE	44.9752	0.39247	9.41643	10.9399
AlRepE-3776	DNA	DNA	33.0427	15.0347	26.0917	10.9393
AlRepD-2225	LINE	Rex-Babar	72.4411	90.5405	33.4764	10.9194
ERV1-6-I_XT	LTR	ERV1	8.35132	0	16.8247	10.912
hAT-N21B_CPB	DNA	hAT-Charlie	209.936	61.2543	113.843	10.9013
R2-N2_Gav	LINE	R2	22.4086	0	43.0812	10.8795
Mariner-18_HSal	DNA	DNA	23.5739	10.6729	18.5353	10.8699
Mothra_OL	DNA	TcMar-Tc1	65.3982	47.0999	13.6407	10.8653
Gypsy-209_DR-I	LTR	Gypsy	5.65452	8.83186	4.18225	10.8581
EnSpm-11_DR	DNA	CMC-EnSpm	198.749	26.9268	75.2847	10.8564
L1-45_ACar	LINE	L1	8.66234	0	11.4955	10.8446
L1-27_DR	LINE	L1	122.42	32.1097	119.961	10.8441
LTR18_Cja	LTR	ERV1	93.5182	26.3172	38.0796	10.8411
hATm-44_HM	DNA	hAT-hATm	19.474	10.2063	0	10.8397
BEL-40_DRe-I	LTR	Pao	41.9597	0.730608	10.402	10.8367
Gypsy-17-I_XT	LTR	Gypsy	95.0743	7.08546	176.077	10.8078
CR1_Ele35	LINE	CR1	6.58308	5.81676	0	10.7464
L2-4_LCh	LINE	LINE	200.464	146.035	270.121	10.7249
DNA-6-N1_DR	DNA	DNA	20.893	0	0	10.7052
AlRepD-79	DNA	TcMar-Tc1	101.807	22.7854	31.5785	10.6704
DNA-X-14_DR	DNA	DNA	1.30097	1.61208	4.05534	10.6702
AlRepD-242	Unknown	Unknown	22.4547	3.96077	16.3348	10.6261
AlRepE-2033	Unknown	Unknown	101.594	15.479	21.1047	10.5964
SacSINE1	SINE	tRNA-Deu-L2	187.955	11.7032	13.8575	10.5693
AlRepE-968	Unknown	Unknown	19.9366	4.85977	19.9333	10.5112
AlRepD-7574	Unknown	Unknown	128.339	54.1748	67.424	10.4901
hAT5-N1_GA	DNA	hAT-hAT5	27.7637	4.03147	18.392	10.4892
Kolobok-2_AA	DNA	Kolobok-Hydra	547.775	66.3676	82.3918	10.4804
AlRepD-392	Unknown	Unknown	177.388	60.8707	23.3424	10.4662
Jockey_Ele3	LINE	Jockey	14.6889	29.3508	44.1684	10.4336
L2-9_LCh	LINE	LINE	25.1741	12.6156	59.97	10.4152
Jockey-3_DRh	LTR	LTR	2.06232	44.3039	25.8419	10.4003
BEL-6_GA-I	LTR	Pao	454.568	18.5657	137.031	10.3863
LTR21_MD	LTR	ERV1	212.34	21.7081	0	10.3841
Mariner-3_DYa	DNA	TcMar-Tc1	13.7972	0.48473	0.880865	10.3793
Gypsy16-I_AG	LTR	Gypsy	58.697	79.8548	117.146	10.3653
Harbinger-1_DR	DNA	PIF-Harbinger	62.3168	22.6339	36.6281	10.3206
BEL-61_DRe-I	LTR	Pao	148.583	104.973	26.6428	10.2844
AlRepD-3604	Unknown	Unknown	4.68823	1.82369	2.2277	10.2123
SACI-5	LTR	Gypsy	7.44948	6.40792	19.4051	10.2048
Mariner-N41_HSal	DNA	DNA	333.935	3.42026	53.1421	10.1853
Dong-1_NVe	LINE	Dong-R4	23.275	22.6679	0	10.1338
EbuSINE2	SINE	tRNA-Deu	3.22699	2.29562	7.74615	10.1138
AlRepD-1286	DNA	TcMar-Tigger	298.684	102.957	48.1679	10.1033
Crack-1_PM	LINE	L2	55.9388	37.7456	34.3485	10.1015
Gypsy70-I_DR	LTR	Gypsy	12.9929	3.70145	8.79575	10.0452
P7SL_Cpo	SINE	7SL	32.4183	38.8505	2.22204	10.0201
Gypsy-25_PM-I	LTR	Gypsy	107.247	36.6084	392.762	9.98573
Sola2-1_HM	DNA	Sola	84.6968	82.5471	6.53171	9.98362
Zisupton-5_DR	DNA	Zisupton	8.61095	5.40663	9.19926	9.90427
Gypsy-171_DR-I	LTR	Gypsy	161.439	205.235	130.957	9.88623
CR1-3_DK	LINE	CR1	7.49698	6.76221	20.129	9.8719
Gypsy-31_DYa-I	LTR	Gypsy	165.682	30.8176	0	9.87145
Tx1-8_CGi	LINE	L1-Tx1	72.7334	5.55194	7.81724	9.86723
ERV25a_MD_LTR	LTR	ERV1	17.1034	1.34334	13.2768	9.86035
Gypsy-16-I_DR	LTR	Gypsy	63.6853	63.9541	156.783	9.85769
L2-5_DRe	LINE	L2	84.1649	12.6434	19.7161	9.85238
DNA-8-34_DR	DNA	hAT-Tip100	19.9285	3.27883	20.7365	9.85117
EnSpm-2_HM	DNA	CMC-EnSpm	45.6717	30.1362	43.1087	9.845
HERVL18-int	LTR	ERVL	0.288744	1.54477	1.40917	9.84154
RNLTR15A2	LTR	ERVK	392.202	5.65246	0	9.82723
Chaplin1a_FR	DNA	hAT-Charlie	0.999834	0.0972789	8.69888	9.78465
Sola2-N2_AAe	DNA	Sola	8.11879	0.291837	28.1958	9.78421
Gypsy102-I_DR	LTR	Gypsy	278.093	67.5099	6.21085	9.78356
DNA2-3_DR	DNA	hAT	202.796	72.4704	153.61	9.7665
AlRepB-358	DNA	hAT-Ac	225.016	79.8929	43.9524	9.74792
LTR-83B_Gav	LTR	ERV1	15.9863	2.88965	21.0699	9.73452
Gypsy-217_AA-I	LTR	Gypsy	32.4131	1.70888	5.31721	9.65431
BEL-6_CGi-I	LTR	Pao	9.18471	1.30095	9.22445	9.63311
BovB_Gd	LINE	RTE-BovB	0.521702	0	149.731	9.63071
AlRepD-12292	Unknown	Unknown	110.239	19.8402	30.8872	9.6207
Gypsy-49_CGi-I	LTR	Gypsy	11.7665	8.59929	8.70165	9.60117
Daphne-41_HMa	LINE	L2	2.11456	4.92281	7.32318	9.58594
Gypsy44-LTR_DR	LTR	Gypsy	54.8117	14.6534	36.4056	9.57427
Gypsy81-I_Dr	LTR	Gypsy	0.579376	0	1.30227	9.57274
hAT-7_PM	DNA	hAT-Charlie	171.339	22.5685	9.41862	9.52943
hAT-30_DR	DNA	hAT-Ac	8.40158	0.599033	9.41592	9.50313
AlRepE-1080	Unknown	Unknown	25.4001	3.00125	18.9535	9.48029
DNA-8-27_DR	DNA	hAT-Ac	80.582	3.22234	9.56279	9.47677
LINEX-1_DR	Retroposon	Retroposon	305.66	31.5728	22.435	9.4734
MER101-int	LTR	ERV1	5.49375	0.994443	5252.3	9.4542
LTR5B	LTR	ERVK	3.94072	4.87911	2.23728	9.45211
BEL-3_DBp-I	LTR	Pao	8.56803	0.409853	0.864512	9.44158
CR1-4_DK	LINE	CR1	5.23538	10.7939	0.644454	9.39199
AGAM2	LINE	CR1	33.4563	88.1567	101.942	9.38148
AlRepE-5764	DNA	hAT-Charlie	27.9358	10.3185	7.34156	9.37652
Gypsy-22_DWil-I	LTR	Gypsy	335.595	3.43408	32.9792	9.34213
DNA-7_NV	DNA	DNA	15.709	3.56794	8.57661	9.33996
Chapaev-10_HM	DNA	CMC-Chapaev	2.87936	1.56029	2.15359	9.3175
BEL32-I_DR	LTR	Pao	258.02	40.5887	47.8754	9.27083
AlRepC-1068	DNA	hAT-Tip100	150.209	109.663	68.3342	9.25795
Gypsy-49_GA-I	LTR	Gypsy	14.8529	4.94591	10.964	9.2549
LTR-651_AMi	LTR	LTR	0.0927169	0.426811	0	9.22545
ERV1-1_CPB-I	LTR	ERV1	0	0	0	9.19266
Gypsy-19_Ano-I	LTR	Gypsy	4.98367	0.473575	15.1584	9.18137
Mariner-5_SIn	DNA	DNA	5.84895	37.1577	54.1688	9.16001
Gypsy-26_Adi-I	LTR	LTR	68.2678	44.6416	31.8471	9.15719
AlRepD-11942	Unknown	Unknown	24.1851	4.58284	12.1842	9.15084
hAT-4_DR	DNA	hAT-Ac	46.2625	9.85551	54.5141	9.12161
Gypsy-38_GA-I	LTR	Gypsy	43.1541	3.15185	7.06232	9.08637
Gypsy-24_DAn-I	LTR	Gypsy	17.1562	13.9793	0	9.0313
Daphne-73_HMa	LINE	L2	56.4299	9.5752	6.30111	9.02703
Gypsy-47_GA-LTR	LTR	Gypsy	6.62631	1.4827	1.1437	9.00927
ERV1-1-EC_I-int	LTR	ERV1	15.512	3.57938	15.5947	8.94858
BEL-1_DAn-I	LTR	Pao	10.5963	17.9409	12.0452	8.94672
AlRepD-2229	LINE	Penelope	29.8609	1.49746	8.66946	8.92748
hAT-N24_Crp	DNA	hAT-Charlie	211.27	37.3416	82.617	8.92539
MER66-int	LTR	ERV1	0.820751	0	6.07628	8.87003
Transib-4_DRh	DNA	CMC-Transib	0.459319	0	0	8.85126
Vingi-4_CPB	LINE	Jockey	0.872629	0	4.69125	8.82217
hAT-20_DR	DNA	hAT-Ac	39.5777	4.82823	106.648	8.79522
Gypsy-18_DEl-I	LTR	Gypsy	1.26253	0	0	8.78288
CR1-50_HM	LINE	CR1	4.91191	1.93381	25.8227	8.77188
AlRepC-190	DNA	DNA	114.984	51.3269	22.4813	8.74625
Mariner-N10_SIn	DNA	DNA	29.7892	2.74371	10.2324	8.70015
Rex1-38_DRe	LINE	Rex-Babar	10.0978	8.93922	0	8.69544
THE1D-int	LTR	ERVL-MaLR	0	0	0	8.67724
BEL-9_GA-I	LTR	Pao	146.701	11.1031	112.061	8.67476
AlRepD-1296	Unknown	Unknown	46.1969	12.1018	38.8332	8.65513
AlRepC-1293	Unknown	Unknown	316.134	78.2609	34.3273	8.64439
SFV1-3_AMi-I	LTR	ERV4	44.5694	10.375	28.0583	8.63879
AlRepE-395	Unknown	Unknown	107.443	64.3991	93.5381	8.61473
hAT-16_DR	DNA	hAT-Ac	112.631	16.0164	125.017	8.59883
P-4_HM	DNA	P	1.59938	2.95138	17.6271	8.59145
AlRepD-1117	LINE	L2	183.021	33.5649	118.246	8.58283
AlRepD-3491	DNA	Sola	32.428	31.2128	7.76265	8.57791
MER4-int	LTR	ERV1	8.12786	7.30554	4.82756	8.57412
CR1-2_DRh	LINE	CR1	9.3845	0.196235	2.1906	8.528
Gypsy-4_OD-I	LTR	Gypsy	176.786	13.2026	21.1831	8.52624
I-3_CQ	LINE	I	11.3266	3.27248	4.3249	8.49742
Gypsy-208_DR-I	LTR	Gypsy	42.3433	15.7099	0.700642	8.49046
Mariner-7_XT	DNA	DNA	66.3373	19.9377	89.7005	8.47057
Gypsy158-I_DR	LTR	Gypsy	25.8501	8.19534	9.03456	8.4635
Gypsy-6_GA-I	LTR	ERV1	12.8543	6.15668	154.988	8.44516
Hoana6	DNA	hAT-Ac	10.4971	26.7699	0	8.42665
Z-REP	Satellite	macro	334.592	37.0119	52.4127	8.42474
Gypsy-23_DEl-I	LTR	Gypsy	35.832	4.7069	23.5945	8.41264
Gypsy-14-I_HM	LTR	Gypsy	82.4138	57.2413	361.087	8.3944
ERV1-1_LA-I	LTR	ERV1	0	0	0	8.39371
AlRepE-463	Unknown	Unknown	129.059	36.3263	28.2961	8.39004
AlRepE-4385	Unknown	Unknown	279.703	120.671	76.9995	8.37725
I_Ele22	LINE	I	10.784	1.0504	0	8.36163
TguERV1_I-int	LTR	ERV1	14.5983	16.872	8.3139	8.36019
Gypsy-153_AA-I	LTR	Gypsy	1.28701	0.445036	1.66508	8.34921
L2-16_DRe	LINE	Rex-Babar	13.125	6.92804	17.5303	8.34613
MER51D	LTR	ERV1	165.829	13.069	0	8.34112
Polinton-1_DGr	DNA	Maverick	7.16576	1.44878	4.22733	8.29481
Gypsy-21_SI-I	LTR	Gypsy	4.30467	17.2474	56.2726	8.28795
hAT-31_LCh	DNA	DNA	27.7385	9.10531	12.2147	8.27869
MurERV4_19-int	LTR	ERVK	625.925	45.5502	96.1856	8.26256
NERV5_MD_I-int	LTR	ERV1	182.815	2.73159	36.8213	8.25487
Proto2-7_CS1	LINE	Proto2	66.9951	13.4211	18.5999	8.21286
L2-56_DR	LINE	L2	26.0285	46.1599	17.2842	8.20722
Gypsy-92_AA-I	LTR	Gypsy	0.422978	0.545528	7.16635	8.17981
Gypsy-37_GA-I	LTR	Gypsy	15.8176	2.65326	73.4817	8.14626
EnSpm-1_AP	DNA	CMC-EnSpm	0.128242	0	1.38877	8.14099
Sola2-2_HM	DNA	Sola	0.704145	0	4.83341	8.136
AlRepE-920	Unknown	Unknown	14.9379	8.89007	8.63752	8.12267
AlRepD-487	DNA	hAT-Ac	454.636	60.9438	150.276	8.09201
hAT-N5_ACar	DNA	hAT-Tip100	46.925	2.96761	14.109	8.08712
5S-Sauria	SINE	5S-Sauria-RTE	27.1227	10.0196	16.969	8.08452
L1-60_DR	LINE	L1	5.8539	1.89645	1.42296	8.08066
REX1_CY	LINE	Rex-Babar	83.7144	25.9548	90.6783	8.0769
hAT-22_DR	DNA	hAT-Charlie	48.0772	13.6137	11.5773	8.03493
L2-1_DR	LINE	L2	24.8769	7.26669	7.01086	8.0271
hAT-8_CPB	DNA	hAT-Charlie	8.43901	83.8328	8.51065	8.02356
CR1-10_NV	LINE	Rex-Babar	34.2502	96.1002	0	8.0212
LDT1	LINE	Jockey	10.7927	2.3822	0	8.00623
HAL1ME	LINE	L1	36.6408	3.06141	33.9928	8.00494
BEL-4_GA-I	LTR	Pao	25.3576	0	51.8415	7.99142
ERV-2_CPB-I	LTR	ERV1	57.3198	14.4216	879.185	7.9897
I_Ele36	LINE	I	11.0241	8.67807	0	7.93738
tRNA-Ser-TCA_m_	tRNA	tRNA	559.762	220.353	39.9349	7.91697
Gypsy-1_FR-I	LTR	Gypsy	103.673	49.6466	112.398	7.90653
Gypsy-2_DSe-I	LTR	LTR	0	0	0	7.90239
Gypsy-29_GA-I	LTR	Gypsy	154.119	46.6091	79.9804	7.90052
L1-69_DR	LINE	L1	13.2316	2.13772	2.97441	7.89169
Kiri-3_CQ	LINE	L2	10.4958	1.78954	17.2094	7.87897
AlRepC-1638	Unknown	Unknown	3.99652	3.32327	4.85128	7.87659
hAT-N108_DR	DNA	hAT-Ac	65.8226	14.8688	37.9429	7.87124
BEL-25_CQ-I	LTR	Pao	20.0065	34.6782	4.33191	7.86394
RTEX-9_SK	LINE	RTE-X	3.83662	0.396945	15.9025	7.85197
Harbinger-2_LCh	DNA	DNA	12.7973	2.67931	4.10418	7.84861
AlRepE-3165	Unknown	Unknown	90.0505	63.601	65.6973	7.84689
hAT-27_HM	DNA	hAT-Ac	65.2428	111.842	47.4348	7.83827
AlRepC-942	Unknown	Unknown	12.941	10.4148	10.6768	7.83302
CR1-2_CQ	LINE	CR1	20.725	6.01906	55.1464	7.82195
I-2_BM	LINE	I	3.66104	0	0	7.81711
Copia11-NVi_I-int	LTR	Copia	9.8649	16.9405	17.6789	7.78774
DNA-X-3_DR	DNA	DNA	46.4476	35.2032	24.7985	7.76128
Gypsy-31-I_DR	LTR	Gypsy	9.26854	5.78752	15.7428	7.72798
CR1-42_DR	LINE	L2	45.6654	1.93273	4.01264	7.72787
Tc1-8_Xt	DNA	TcMar-Tc1	40.208	23.1207	157.737	7.71944
DNA6-10_DR	DNA	DNA	116.914	33.4088	20.5187	7.71937
MarsTigger3c	DNA	TcMar-Tigger	3.93469	2.2375	0	7.695
Chaplin1_FR	DNA	hAT-Charlie	19.5789	7.91032	27.8617	7.69112
AlRepD-1784	LINE	L2	106.148	45.6331	58.7214	7.68616
BEL-14_Adi-I	LTR	Pao	1.60222	2.19182	0	7.64232
Chapaev-3_ACa	DNA	CMC-Chapaev	5.15691	4.40734	39.5777	7.63343
Tx1-1_DR	LINE	L1-Tx1	206.445	0	16.5516	7.60034
AlRepD-3161	Unknown	Unknown	250.868	41.6097	65.9924	7.59268
DNA-TTAA0-1_DR	DNA	DNA	67.2729	10.0189	15.9411	7.5636
INV2j_DB	Unknown	Unknown	152.704	0	5.34986	7.53944
AlRepD-5842	LINE	Rex-Babar	233.286	70.4519	61.3666	7.52718
Gypsy-1_PBa-I	LTR	LTR	4.80026	2.84942	7.06819	7.52653
hATN-28_DRe	DNA	hAT-Charlie	15.3725	10.0306	1.75755	7.51641
L1-54_DR	LINE	L1	49.5591	4.62644	83.8933	7.51255
R2A_NVi	LINE	R2	7.89359	2.34474	32.8001	7.49842
Gypsy-28_Adi-I	LTR	Gypsy	0.953546	1.21946	28.7639	7.48537
TZF28C	DNA	TcMar-Tc1	102.024	23.4418	49.0901	7.47322
Gypsy-11_TCa-I	LTR	Gypsy	0.50376	1.28849	25.0324	7.46908
AlRepD-92	Unknown	Unknown	5.20635	8.98858	5.87339	7.46583
Mariner-N12_DR	DNA	TcMar-Tc1	13.8384	465.908	106.324	7.46238
AlRepE-983	LINE	R2-Hero	180.104	71.467	13.7805	7.45709
Gypsy-43_DWil-I	LTR	Gypsy	21.1088	17.9061	14.6595	7.40708
AlRepC-3203	Unknown	Unknown	28.4314	25.701	9.31506	7.38836
hAT-1_LCh	DNA	DNA	66.6669	0.248335	25.9933	7.36995
AlRepB-136	Unknown	Unknown	21.7476	5.33146	9.2468	7.35537
HeT-A3_DVi	LINE	Jockey	6.25435	2.4741	18.123	7.35277
Gypsy122-I_DR	LTR	Gypsy	23.285	0.983219	12.9161	7.32168
I-7_DBp	LINE	I	205.01	2.60175	61.1098	7.31888
tRNA-Thr-ACG	tRNA	tRNA	0	10.8914	0	7.30821
LYDIA_I-int	LTR	Gypsy	0.889976	0	0	7.30821
AlRepD-1127	LINE	L1	222.344	59.7767	32.6383	7.29218
tRNA-Arg-AGG	tRNA	tRNA	13.0403	9.75129	6.16435	7.25482
EnSpm-7_HM	DNA	CMC-EnSpm	184.836	4.82038	9.10326	7.24683
RNNICER3-int	LTR	ERV1	1.79796	10.3945	6.22636	7.24446
Gypsy148-LTR_DR	LTR	Gypsy	0.741735	0	0	7.23641
NonLTR-1_DR	Retroposon	Retroposon	25.741	17.3896	0	7.23528
AlRepD-4675	Unknown	Unknown	81.1001	14.7097	17.9536	7.23113
CR1-1_AG	LINE	L2	175.212	51.7953	3.48639	7.21599
Mariner-8_DAn	DNA	TcMar-Tc1	6.41076	5.94111	74.2477	7.16516
AlRepC-13	LINE	Rex-Babar	16.9911	5.55858	9.71727	7.16228
EnSpm-N18_DR	DNA	CMC-EnSpm	24.1669	24.8821	10.3708	7.15571
L1-70_DR	LINE	L1-Tx1	7.08436	1.05251	15.4297	7.11192
L1-85_DR	LINE	L1-Tx1	28.7748	12.8175	40.8935	7.07709
Kolobok-12_HM	DNA	Kolobok-Hydra	11.6303	0	0	7.06973
P-11_HM	DNA	P	43.5831	23.3674	73.2268	7.06113
AlRepE-193	Unknown	Unknown	115.722	145.393	41.2114	7.05992
BEL-4_DBi-I	LTR	Pao	22.4742	0.223169	7.40561	7.05309
Mariner-1_BF	DNA	TcMar-Tc1	34.0834	9.71046	14.6047	7.04137
Crack-3_AAe	LINE	L2	3.14943	2.91163	6.86536	7.03551
Tx1-4_AAe	LINE	L1-Tx1	0	0	0	7.0354
Gypsy-5_RP-I	LTR	Gypsy	0	0	0	7.03093
hATm-20_HM	DNA	hAT-hATm	0.87686	0	1.00316	7.02908
EnSpm-2_DR	DNA	CMC-EnSpm	9.54799	7.33327	152.169	7.01737
L1-94_DR	LINE	L1	599.587	99.0703	111.503	7.00939
Homo10	DNA	hAT-Ac	0.736921	1.45297	24.3814	6.99722
AlRepE-8693	DNA	hAT-Tip100	6.86548	2.1165	2.9212	6.99592
P-1_DR	DNA	P	33.3408	3.59571	446.571	6.98021
HATN17_DR	DNA	hAT	487.232	38.366	69.3446	6.93562
Mariner4_CE	DNA	TcMar-Mariner	0.890003	0.319604	29.8976	6.9346
Gypsy-88_AA-I	LTR	Gypsy	15.9758	2.46657	6.98005	6.92119
AlRepD-3782	LINE	Rex-Babar	38.9301	3.68561	34.065	6.90716
OSSINE1	SINE	5S-Deu-L2	4.71338	6.29125	6.8839	6.90372
Harbinger-3_BF	DNA	PIF-Harbinger	4.2196	1.75576	0.733345	6.894
Jockey_Ele2	LINE	Jockey	24.8087	7.86575	64.1872	6.88125
Gypsy11-NVi_I-int	LTR	Gypsy	149.214	21.5544	208.425	6.88098
Academ-4_BF	DNA	Academ	8.58383	0.150418	7.99604	6.86909
Gypsy4-SM_I-int	LTR	Gypsy	21.2242	1.06703	20.5829	6.85144
CR1-2_TCa	LINE	L2	25.2772	0	3.13183	6.83847
DNA8-89_AP	DNA	hAT-Tip100	5.35563	20.5376	0	6.81768
AlRepE-554	Unknown	Unknown	28.6978	34.1156	22.7821	6.81708
Proto2-8_CS1	LINE	Proto2	3.29052	4.10073	6.92533	6.81528
Mariner-59N1_HSal	DNA	DNA	12.9573	14.4417	9.1036	6.80042
BEL-60_DRe-I	LTR	Pao	71.5374	7.51886	169.379	6.74894
ERV1-1B_CPB-I	LTR	ERV1	14.7994	51.8465	42.1363	6.73716
AlRepD-2524	Unknown	Unknown	40.7398	12.768	6.255	6.73458
Galileo_DW	DNA	P	11.1086	5.5137	4.64109	6.7335
L2-1_LCh	LINE	LINE	63.2858	58.5893	13.6145	6.72952
AlRepD-2665	LTR	ERV1	4.94859	1.67353	1.86269	6.72641
AlRepE-7416	LTR	Gypsy	14.0621	8.26486	12.967	6.70736
L1-108_DR	LINE	L1	203.52	60.9596	24.5313	6.70452
BEL-18_CQ-I	LTR	Pao	15.0833	3.16027	44.586	6.69515
BEL-1_GA-I	LTR	Pao	22.1777	95.9614	218.506	6.69129
BEL-618_AA-I	LTR	Pao	160.573	1.34701	56.9431	6.68943
L1-74_DR	LINE	L1-Tx1	61.2517	20.8728	68.9621	6.68603
SSU-rRNA_Hsa	rRNA	rRNA	9.84673	3.08949	21.7529	6.6648
Mariner2_AG	DNA	TcMar-Tc1	0	0	0	6.65716
Sola1-10_AP	DNA	Sola	0	0	0	6.64382
RP5S	rRNA	rRNA	22.2838	61.3704	8.78141	6.63881
EnSpm-8_HM	DNA	CMC-EnSpm	16.5272	2.52925	15.7533	6.62933
Helitron-N18_CGi	RC	Helitron	16.3542	7.94333	9.50678	6.61246
Rex1-1_FR	LINE	Rex-Babar	64.2904	23.8253	11.7633	6.60796
RTE-1_PM	LINE	RTE-BovB	0	0.426811	1.14512	6.60078
Mariner-1_DR	DNA	TcMar-Tc1	27.4019	8.79947	5.08734	6.58651
CR1-117_AAe	LINE	CR1	3.48924	1.54716	8.38017	6.58262
Chapaev-4_HMa	DNA	CMC-Chapaev-3	7.34581	0	5.48601	6.57166
L1_AC_7	LINE	L1	60.6046	10.9778	7.71821	6.56329
AlRepE-6770	Unknown	Unknown	36.3096	1.50998	6.28492	6.56172
TSESSEBEII	DNA	TcMar-Tc1	391.027	11.2422	26.4564	6.555
Mariner-9_DF	DNA	TcMar-Tc1	26.4472	7.06263	20.2942	6.54466
Dada-1_BF	DNA	Dada	9.54201	0.449301	4.54	6.49289
BEL-83_AA-I	LTR	Pao	0.146369	1.46757	0.561526	6.49002
hAT-44_Lch	DNA	DNA	1.48243	0.954162	11.7425	6.4804
AlRepD-229	Unknown	Unknown	25.7961	41.1181	15.8346	6.4774
Copia1-I_DR	LTR	Copia	116.017	44.468	6.89959	6.45008
Penelope-12_HM	LINE	Penelope	1214.11	3.74913	10.817	6.44912
LOA-5_CQ	LINE	LOA	6.78877	26.5979	10.6335	6.44912
HPAI	SINE	tRNA-L2	469.451	0	0	6.44912
Kiri-9_AAe	LINE	L2	0.867211	0.780256	0	6.44894
Transib-7_AAe	DNA	CMC-Transib	63.4693	0	0	6.44842
Gypsy-8_DAn-I	LTR	Gypsy	47.0866	82.7899	9.26956	6.43364
Copia-1_AA-I	LTR	Copia	13.6439	0.437755	0	6.42851
RLTR14-int	LTR	ERV1	31.956	47.6594	14.0027	6.41463
Chapaev3-1_PM	DNA	CMC-Chapaev-3	14.3847	11.0713	13.4088	6.40772
DNA3-20_CGi	DNA	DNA	28.5387	14.9951	11.5791	6.40469
Kolobok-2_DR	DNA	Kolobok-T2	86.9551	10.466	30.7254	6.39176
Ginger1-9_HM	DNA	Ginger	3.88709	2.23901	8.16828	6.3771
SINE_FR1c	SINE	tRNA-Mermaid	7.79233	2.95124	5.42052	6.37635
RLTR20A3_MM	LTR	ERVK	0.733876	0	0	6.36909
Gypsy-12_Adi-I	LTR	Gypsy	21.9107	22.198	13.1195	6.36823
Gypsy-56_GA-I	LTR	Gypsy	109.232	24.4568	151.348	6.36778
AlRepD-497	Unknown	Unknown	156.004	35.0972	117.366	6.33802
AlRepD-4130	DNA	hAT-Ac	45.6161	20.3014	38.0953	6.32576
UCON62_LCh	Unknown	Unknown	44.9616	33.5813	12.2896	6.3199
BEL18-I_DR	LTR	Pao	61.2462	19.5741	404.63	6.28362
Jockey-11_DF	LINE	Jockey	5.73129	5.18921	14.8458	6.26507
hAT-N137_DR	DNA	hAT-Tol2	41.2051	28.999	29.0072	6.24967
SAT-17_DR	Satellite	Satellite	45.8876	48.3594	248.924	6.24412
RatSatRep1	Satellite	Satellite	13.117	0	0	6.21865
Gypsy-165-I_DR	LTR	Gypsy	31.4723	3.38184	18.6133	6.20902
AlRepE-205	Unknown	Unknown	26.8251	11.069	13.322	6.19766
DNA-1-9_DR	DNA	PIF-Harbinger	22.0604	6.77673	0	6.19115
AlRepD-2135	Unknown	Unknown	56.2011	33.6562	30.7953	6.18032
hAT-N149_DR	DNA	hAT	14.4097	7.60151	4.57478	6.16442
NonLTR-1C_DR	Retroposon	Retroposon	38.3639	34.9688	33.0183	6.11112
L2_AC_13	LINE	L2	2.30548	0.86725	0	6.10565
AlRepD-8976	Unknown	Unknown	25.7563	3.71421	41.6044	6.08189
IS3EU-5_DR	DNA	IS3EU	46.164	5.62385	120.048	6.07894
L1-15c_Lch	LINE	LINE	4.07474	0	6.255	6.06976
ERV-2_LCh-I	LTR	LTR	9.19023	2.64645	0	6.06976
hAT-N120_DR	DNA	hAT-Charlie	0.101361	0.170724	0.531675	6.04634
ERV4-2_CPB-LTR	LTR	ERV4	0	0	10.3709	6.03877
AlRepE-1678	LINE	L2	14.4068	4.14982	11.0226	6.03291
DIRS-1c_Lch	LTR	LTR	9.99244	0.355676	0	6.03034
Tc1-7_Xt	DNA	TcMar-Tc1	26.1219	22.4078	31.8455	6.02242
Gypsy149-I_DR	LTR	Gypsy	19.7607	14.0564	60.7141	5.98703
REX1-5_XT	LINE	Rex-Babar	2053.82	183.926	38.9229	5.98514
Gypsy-14_DAn-I	LTR	Gypsy	0.832646	0	0	5.98179
Chapaev-1_AA	DNA	CMC-Chapaev	230.213	38.2643	16.7844	5.96582
BEL-11_GA-I	LTR	Pao	5.39991	0	5.49388	5.92904
[truncated: 10,670 more rows]
